# Supplementary material for: Comparative Genomic Analysis of Soybean Flowering Genes
Source: PubMed Central journal article supplement (PMC3367986; doi:10.1371/journal.pone.0038250), 2012-06-05

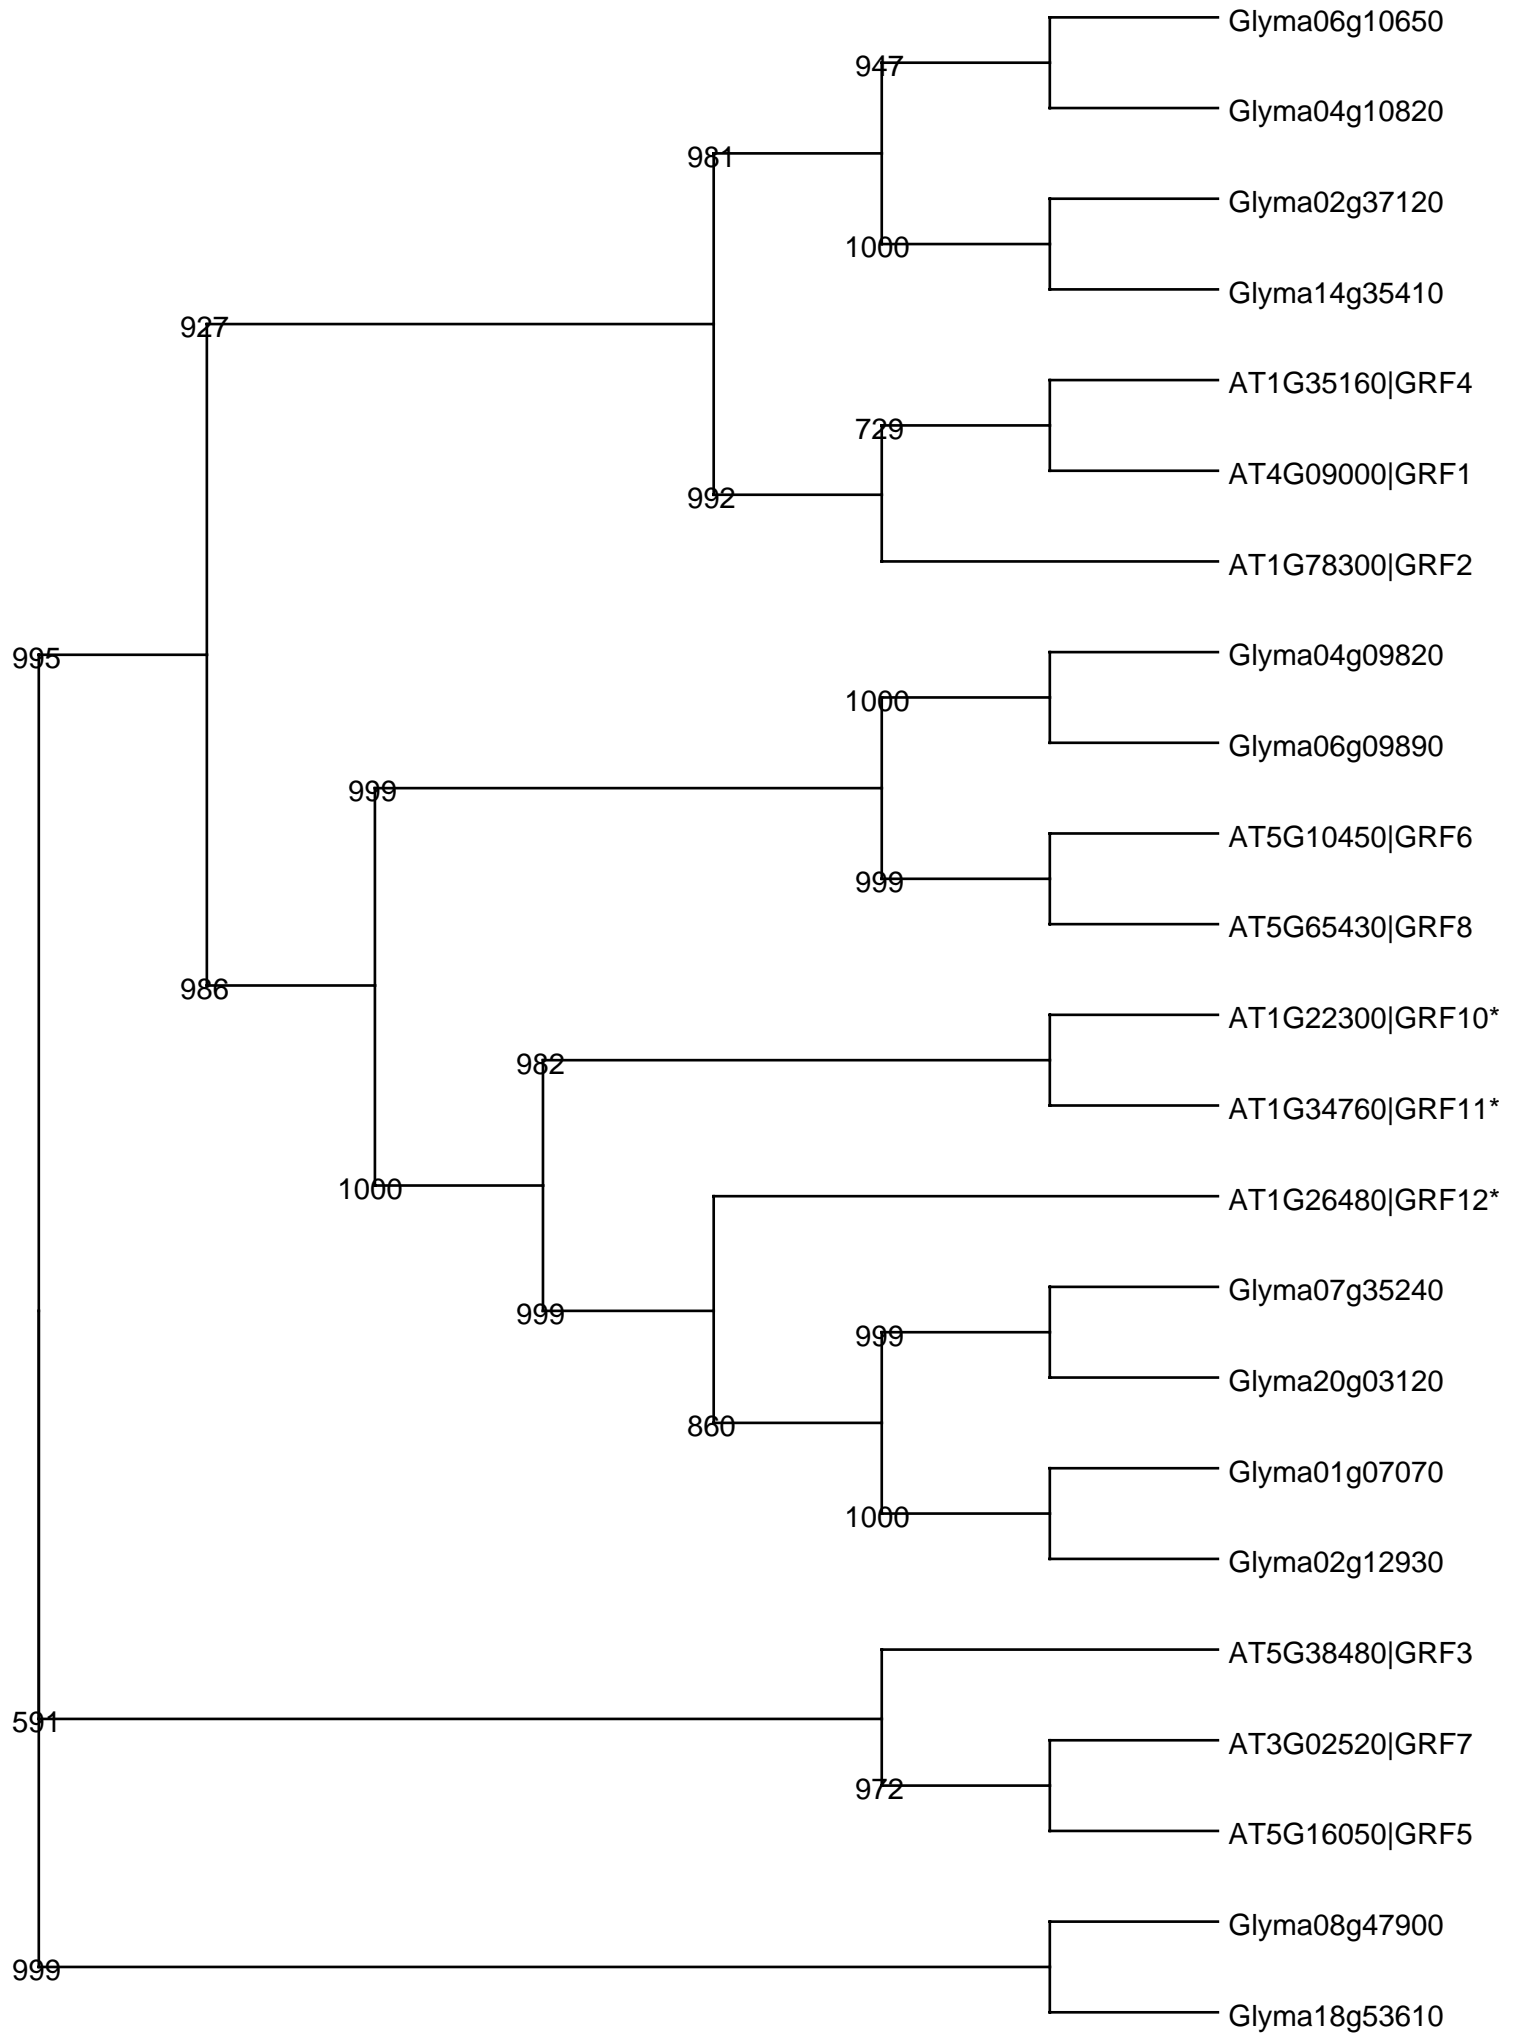

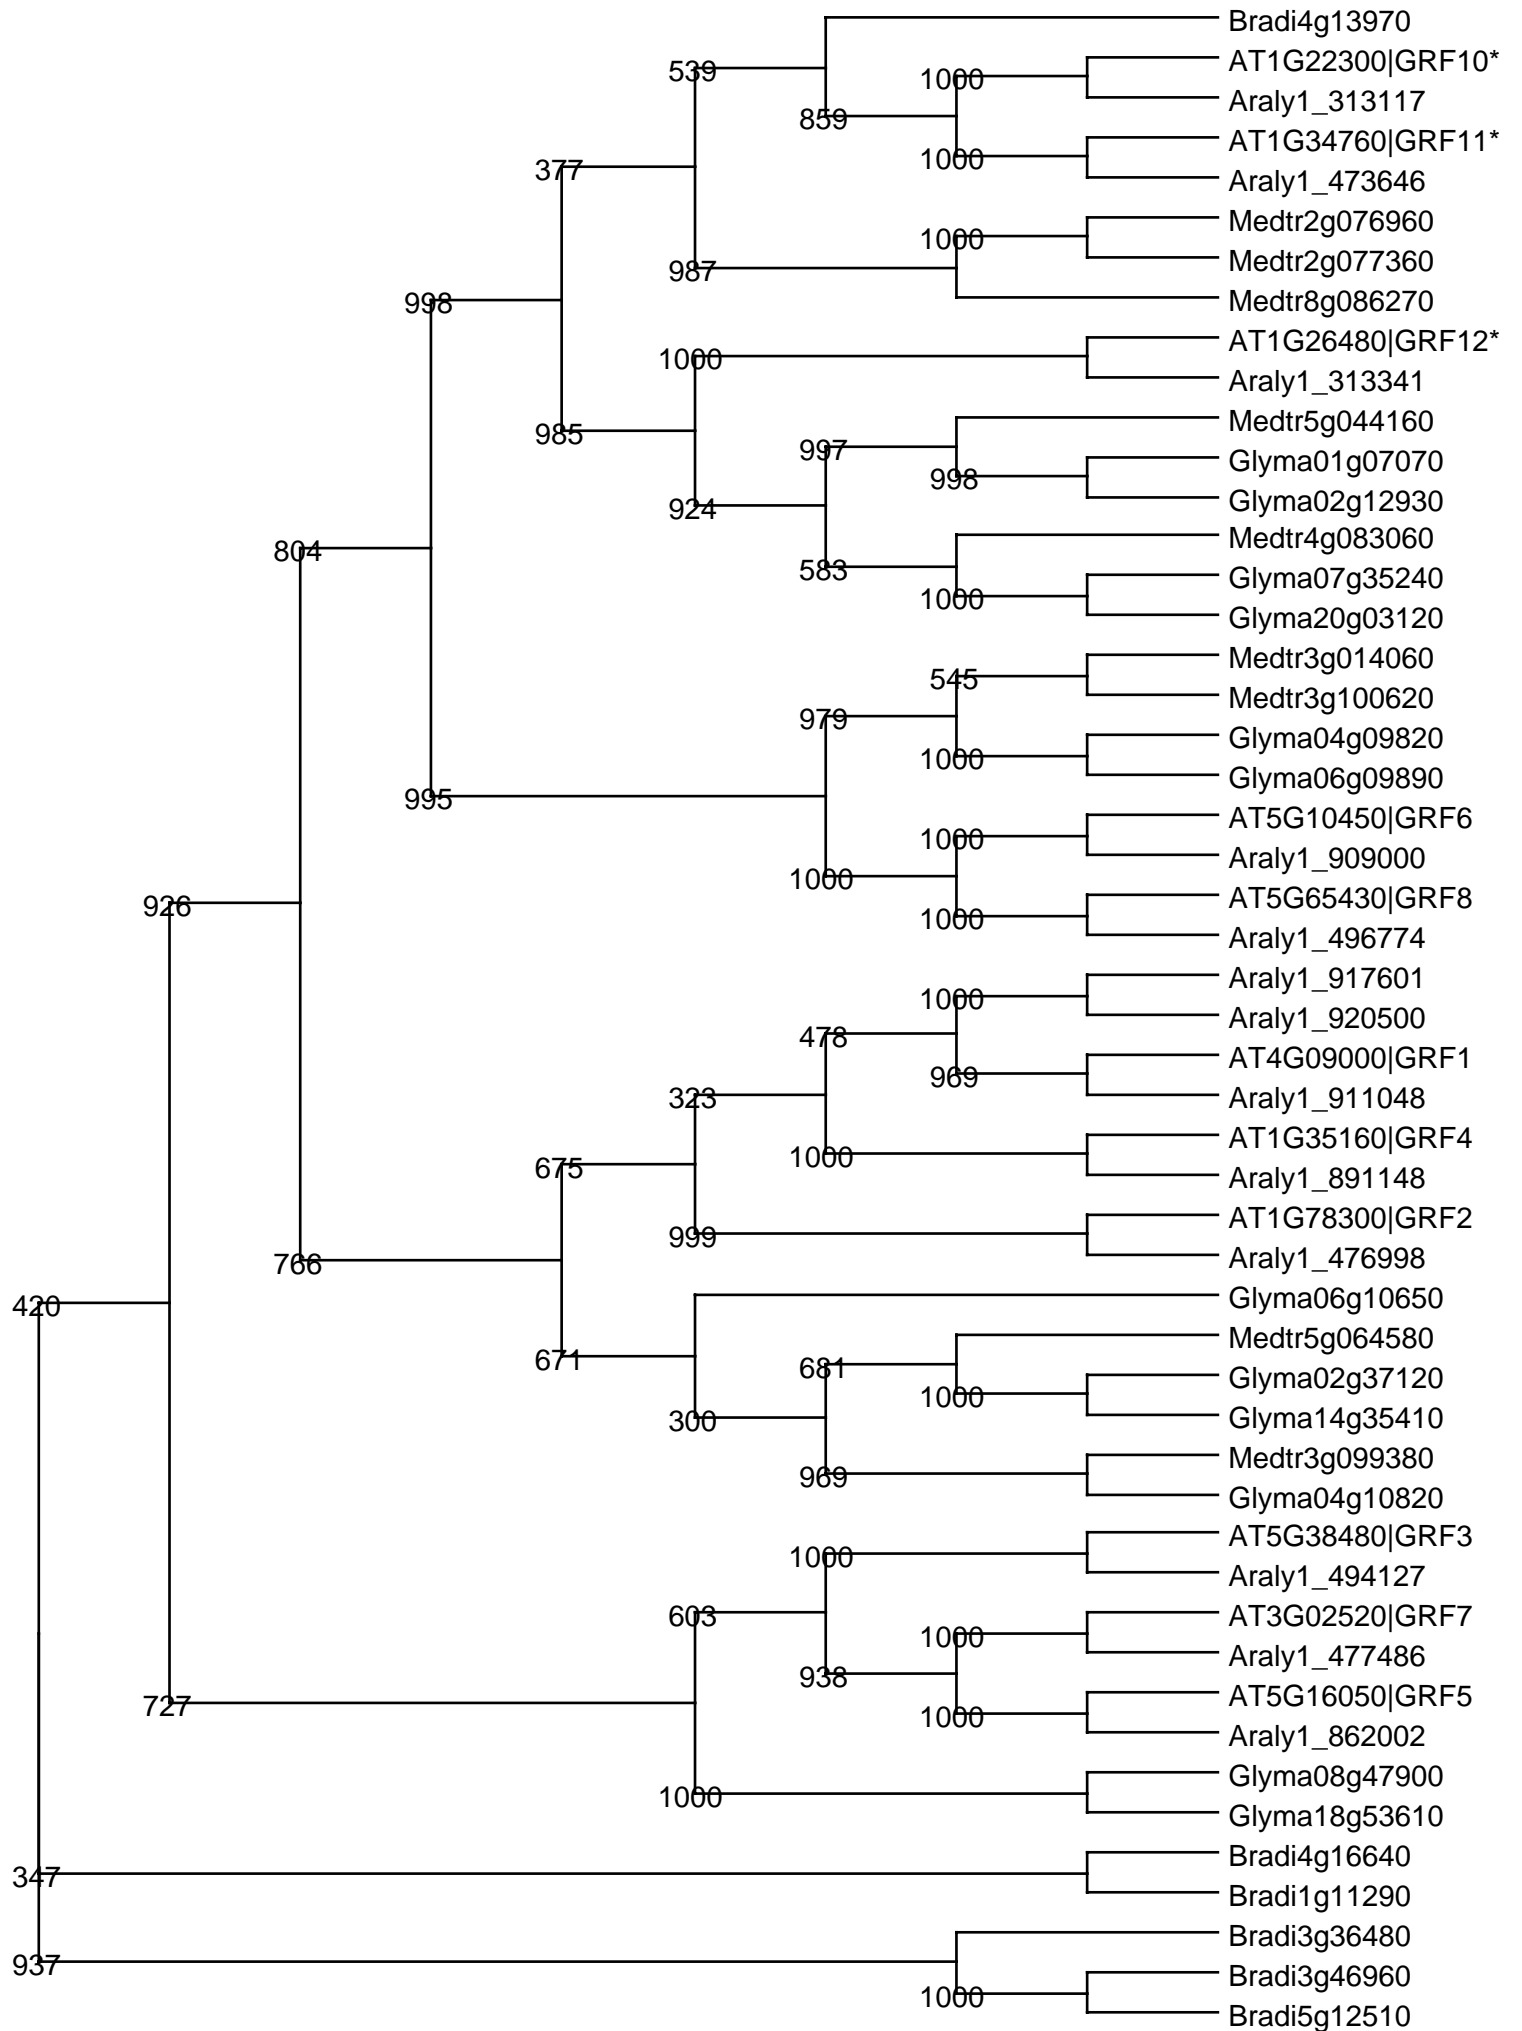

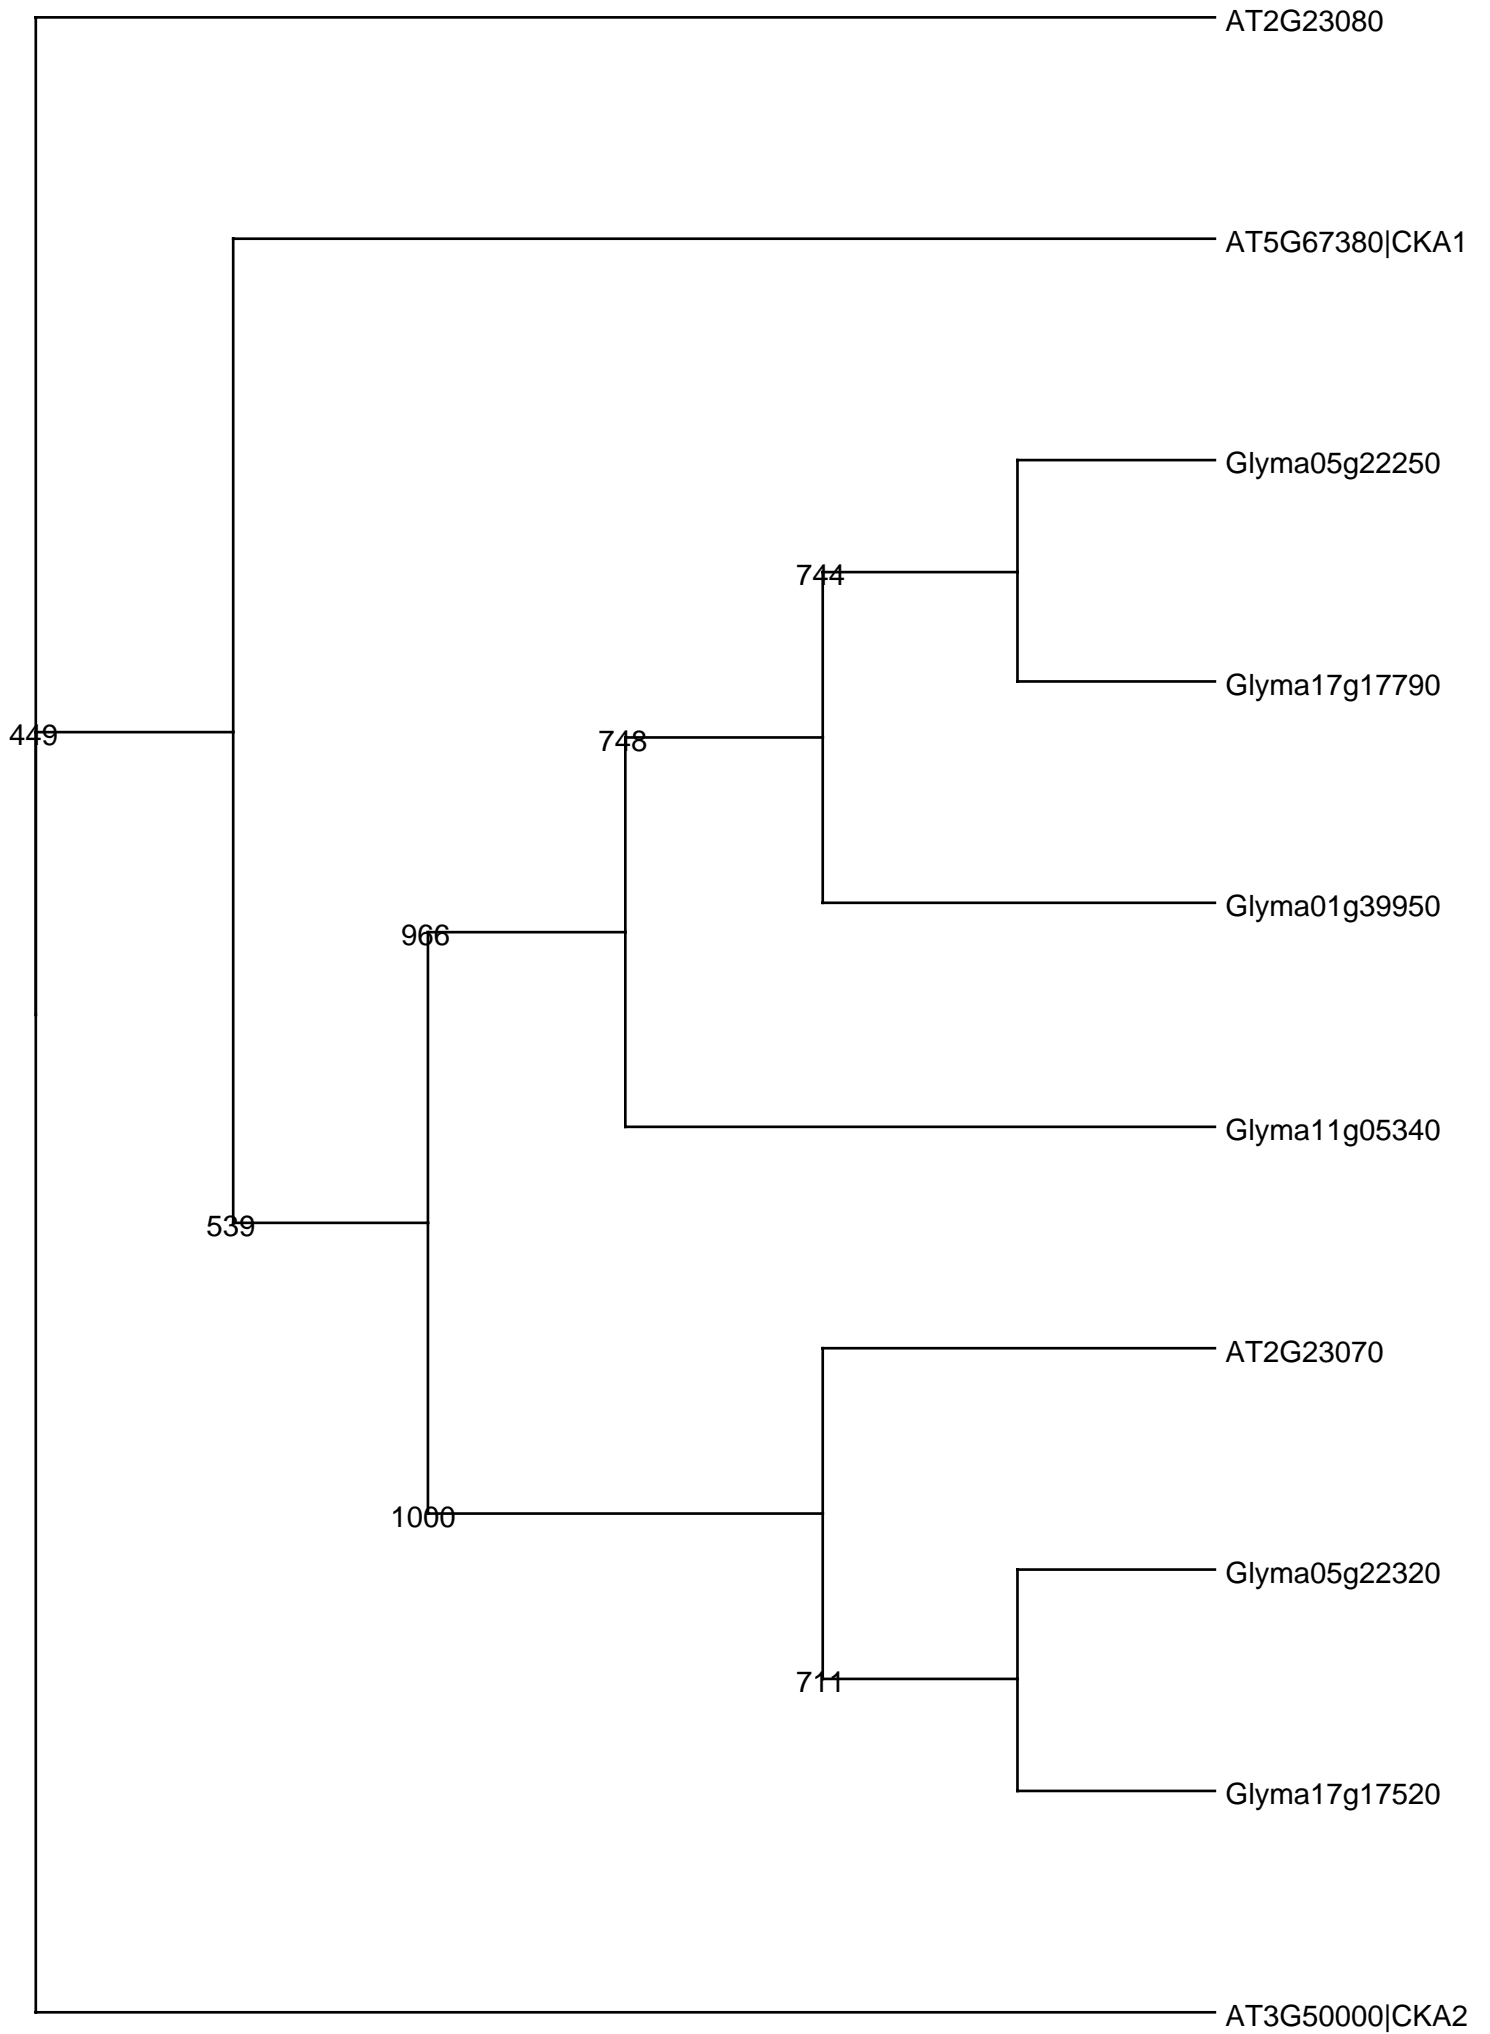

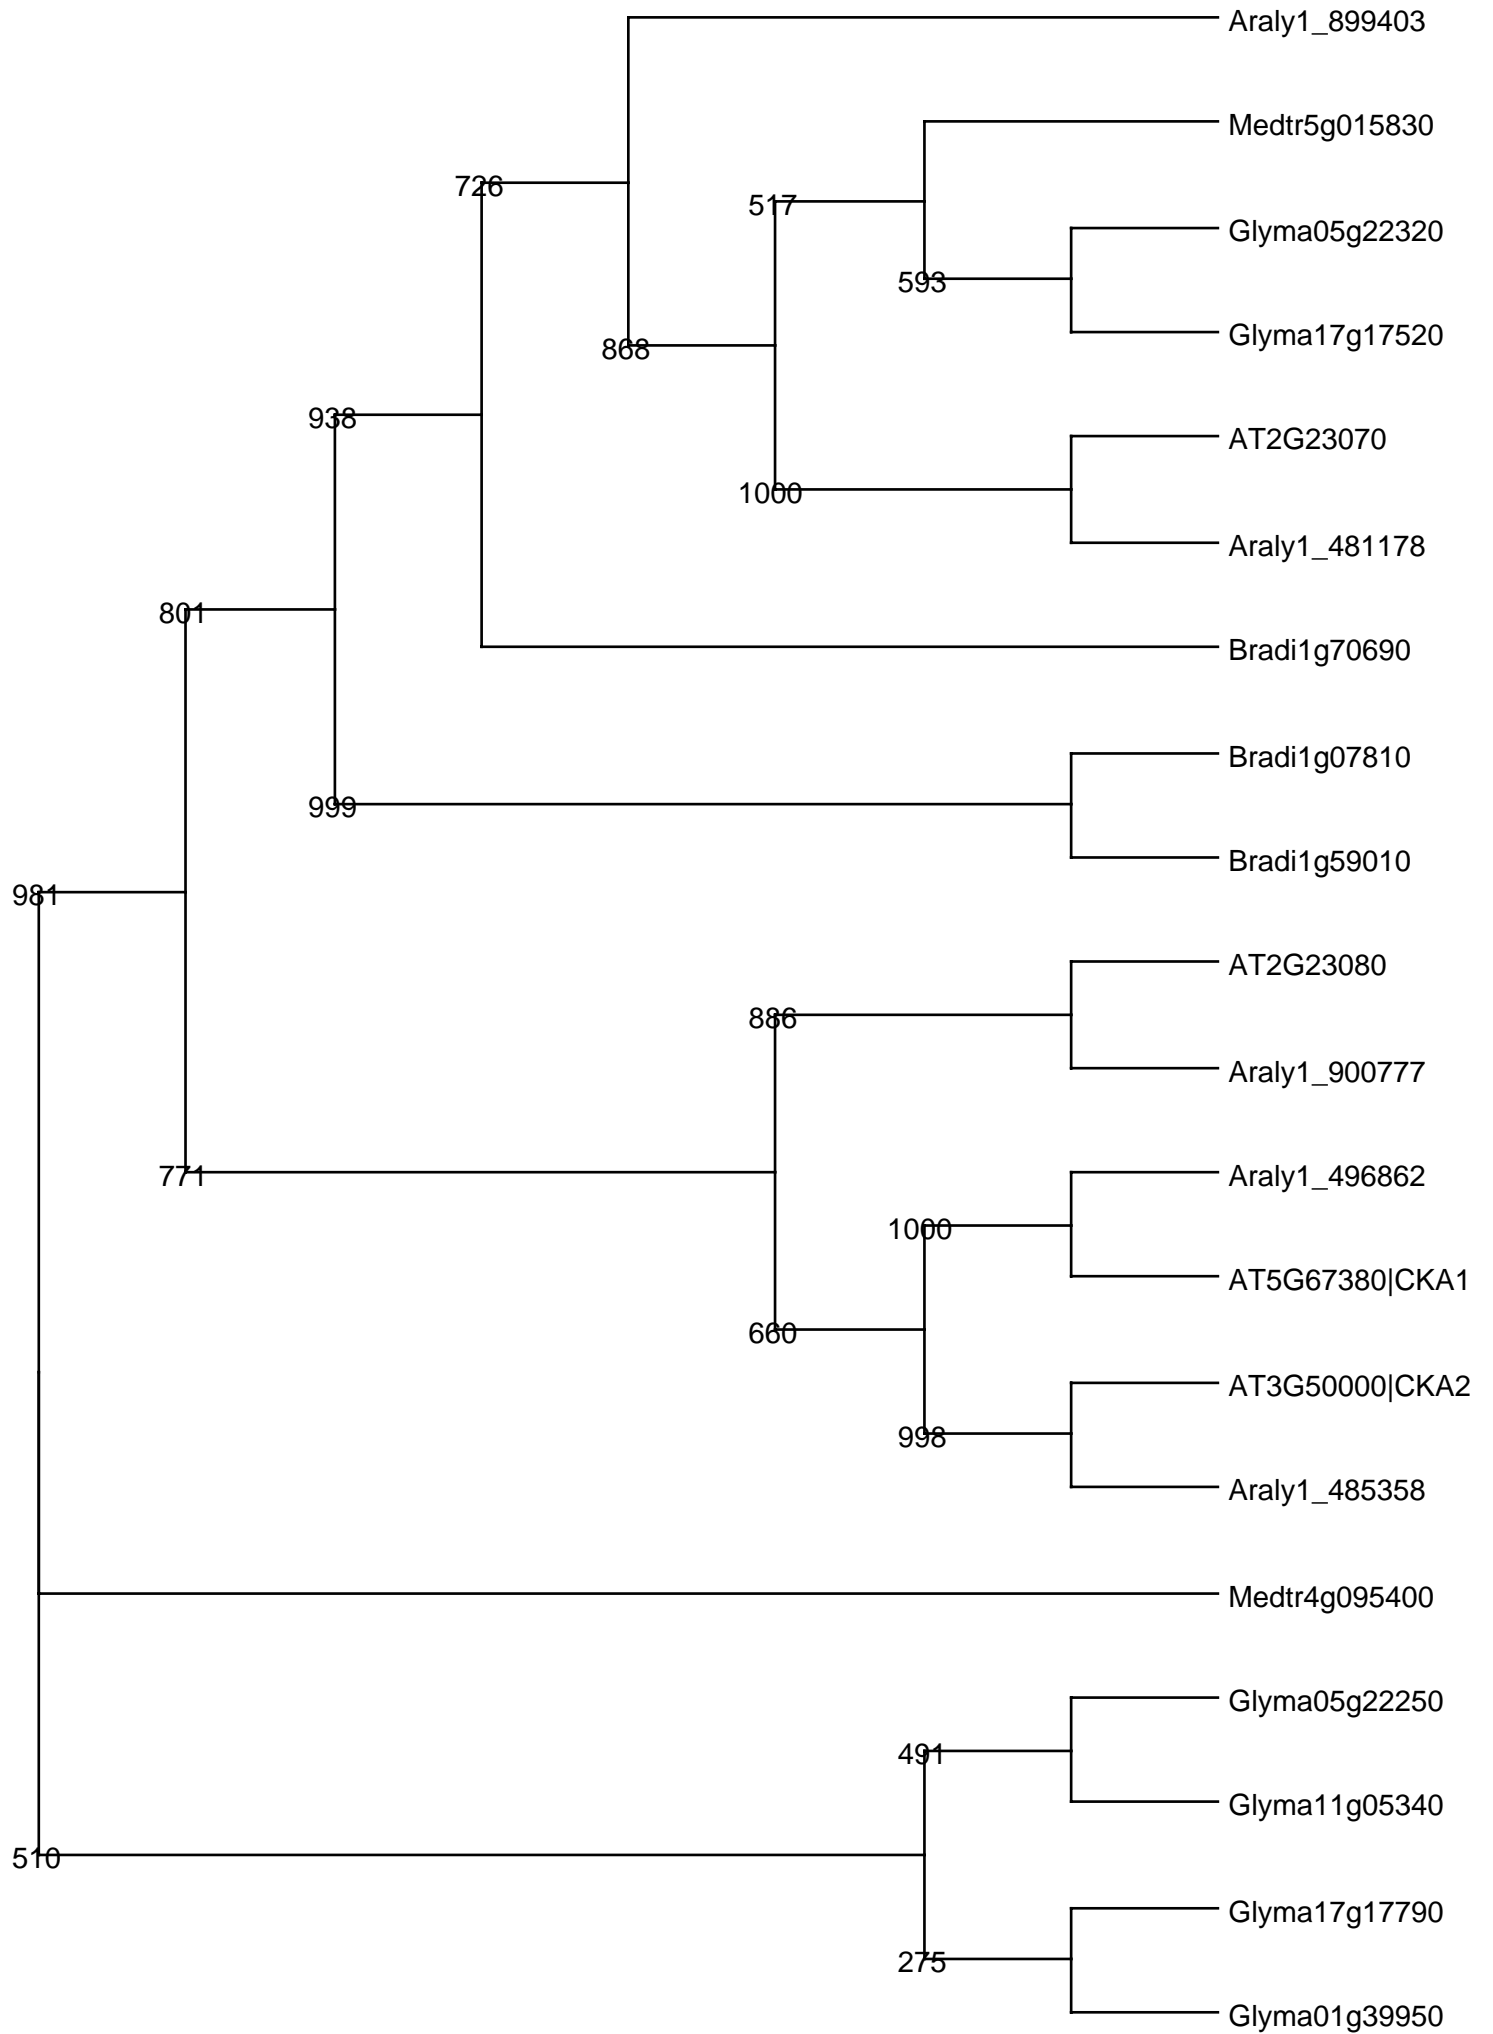

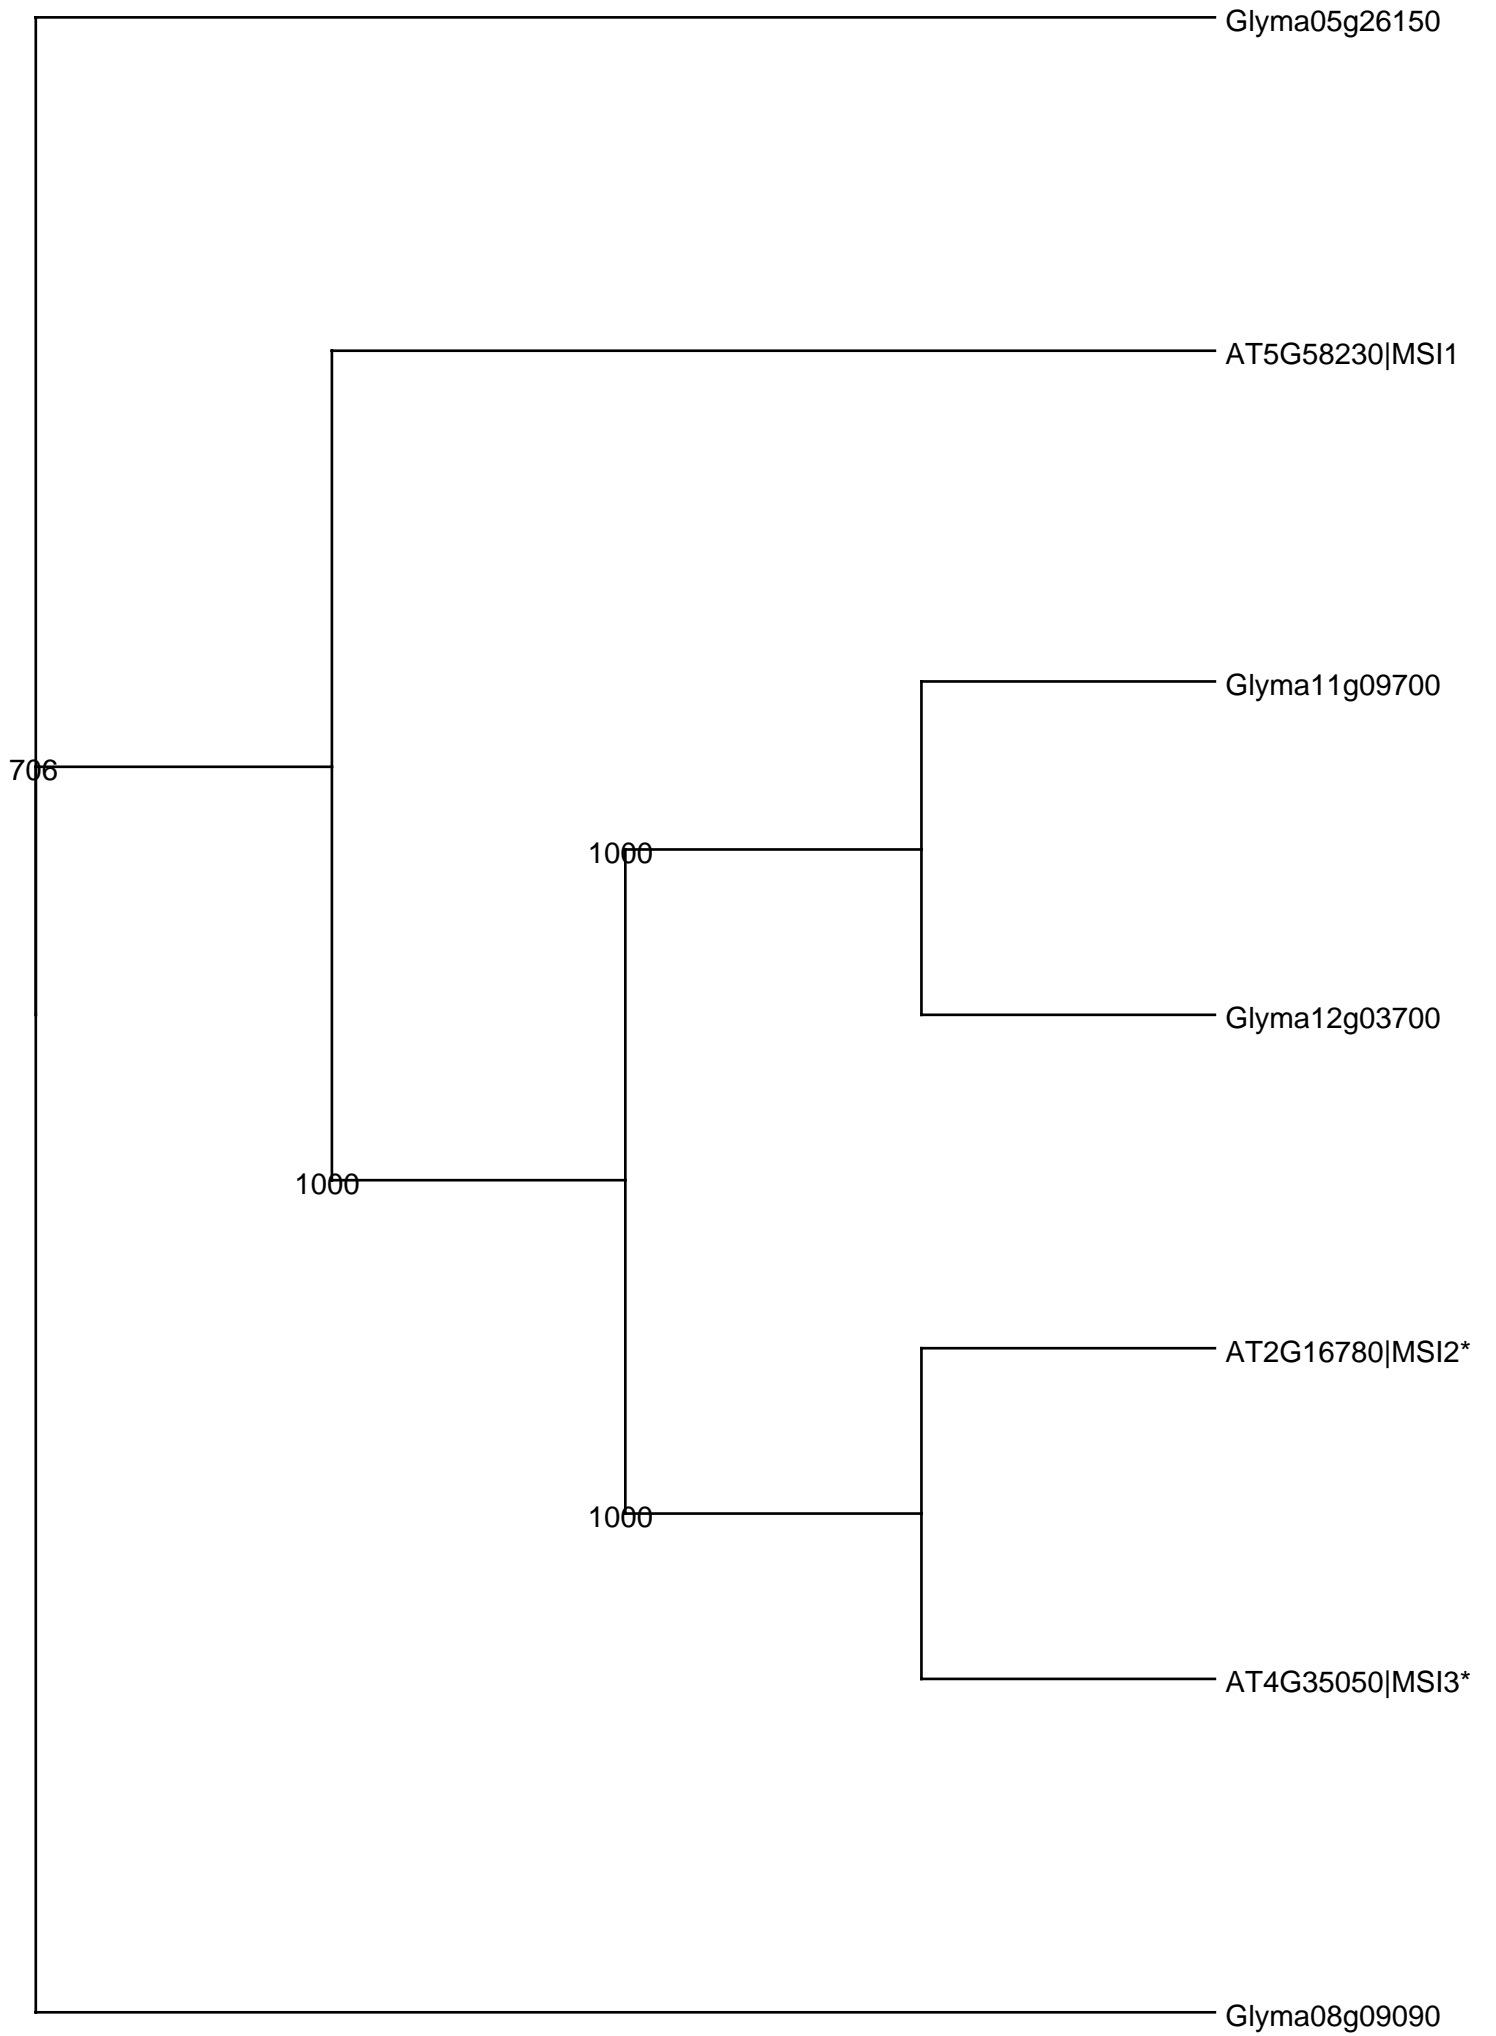

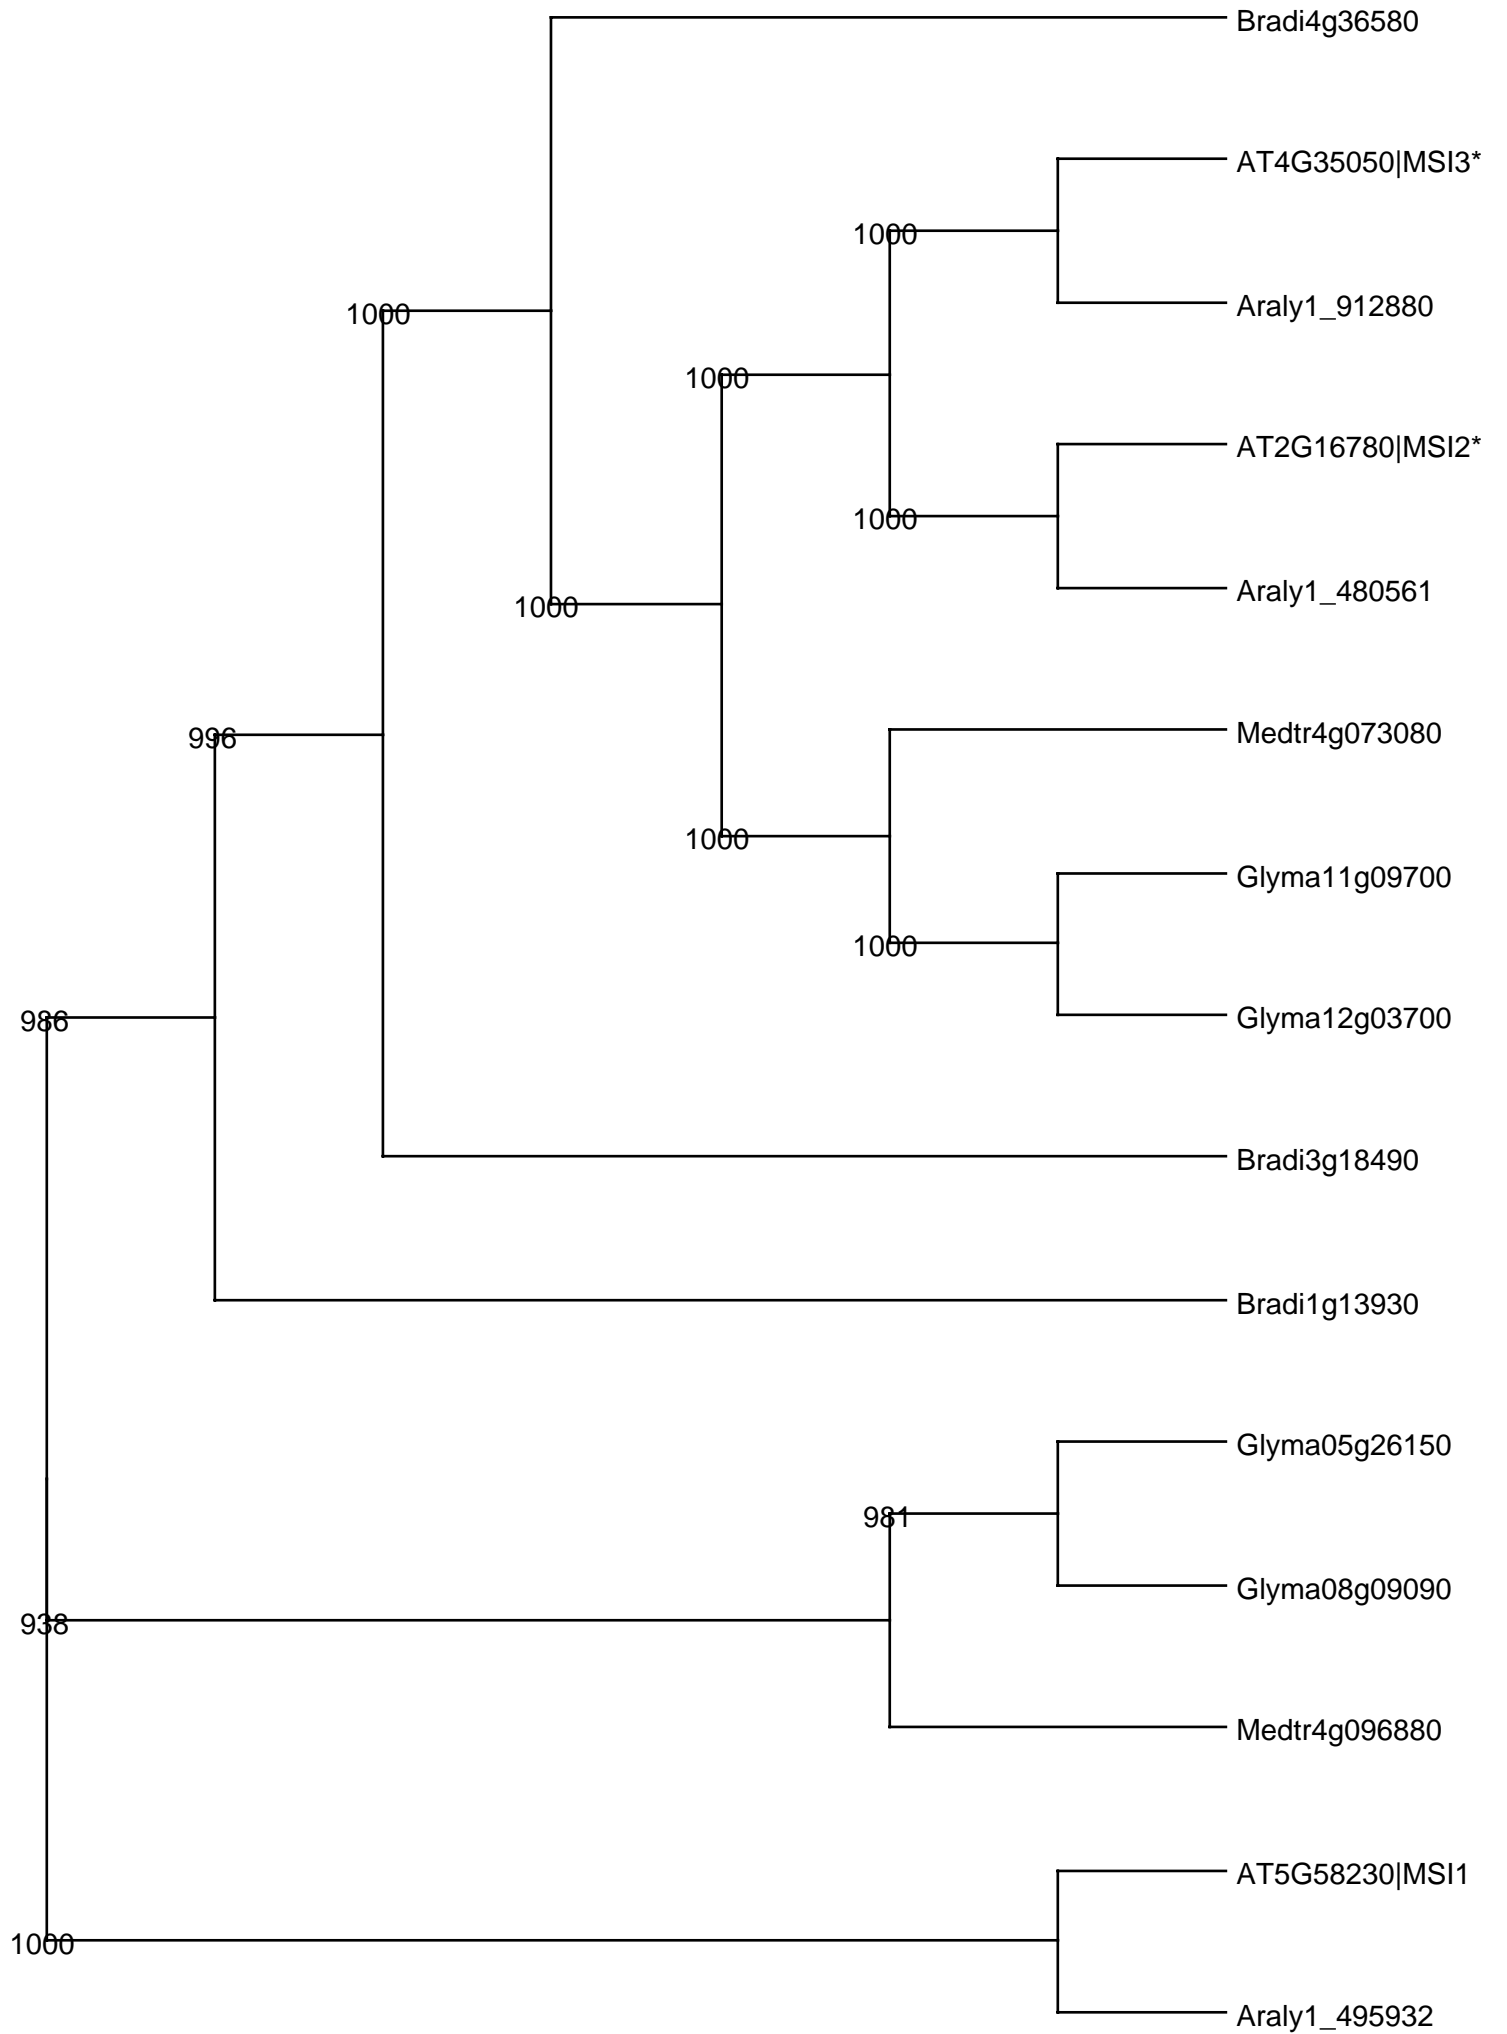

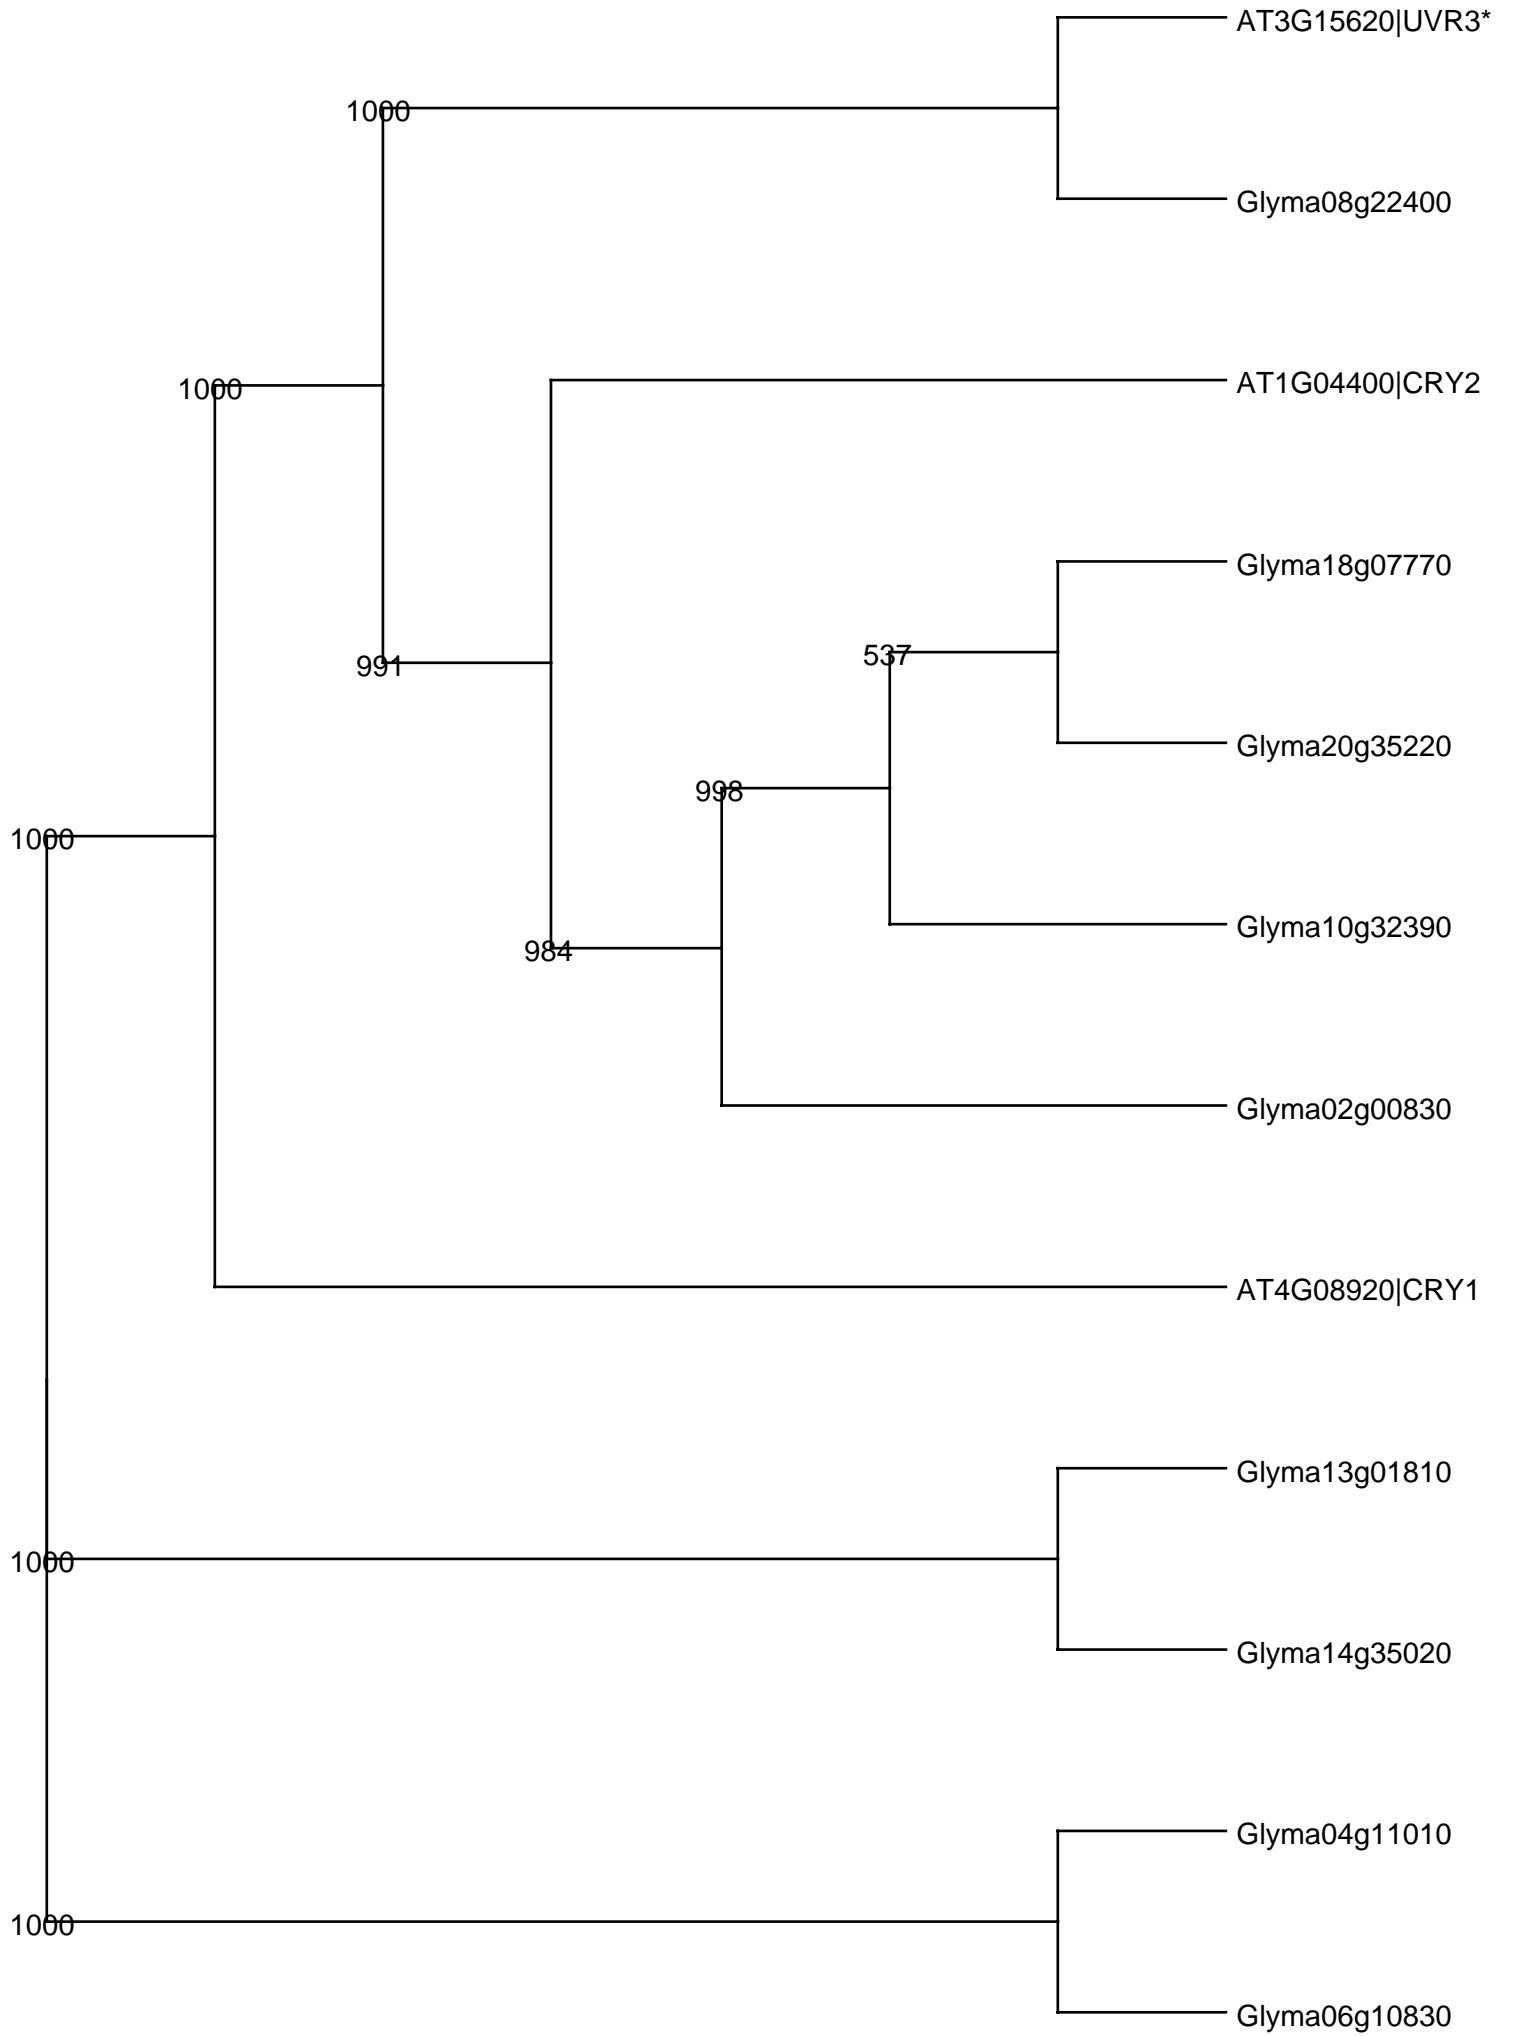

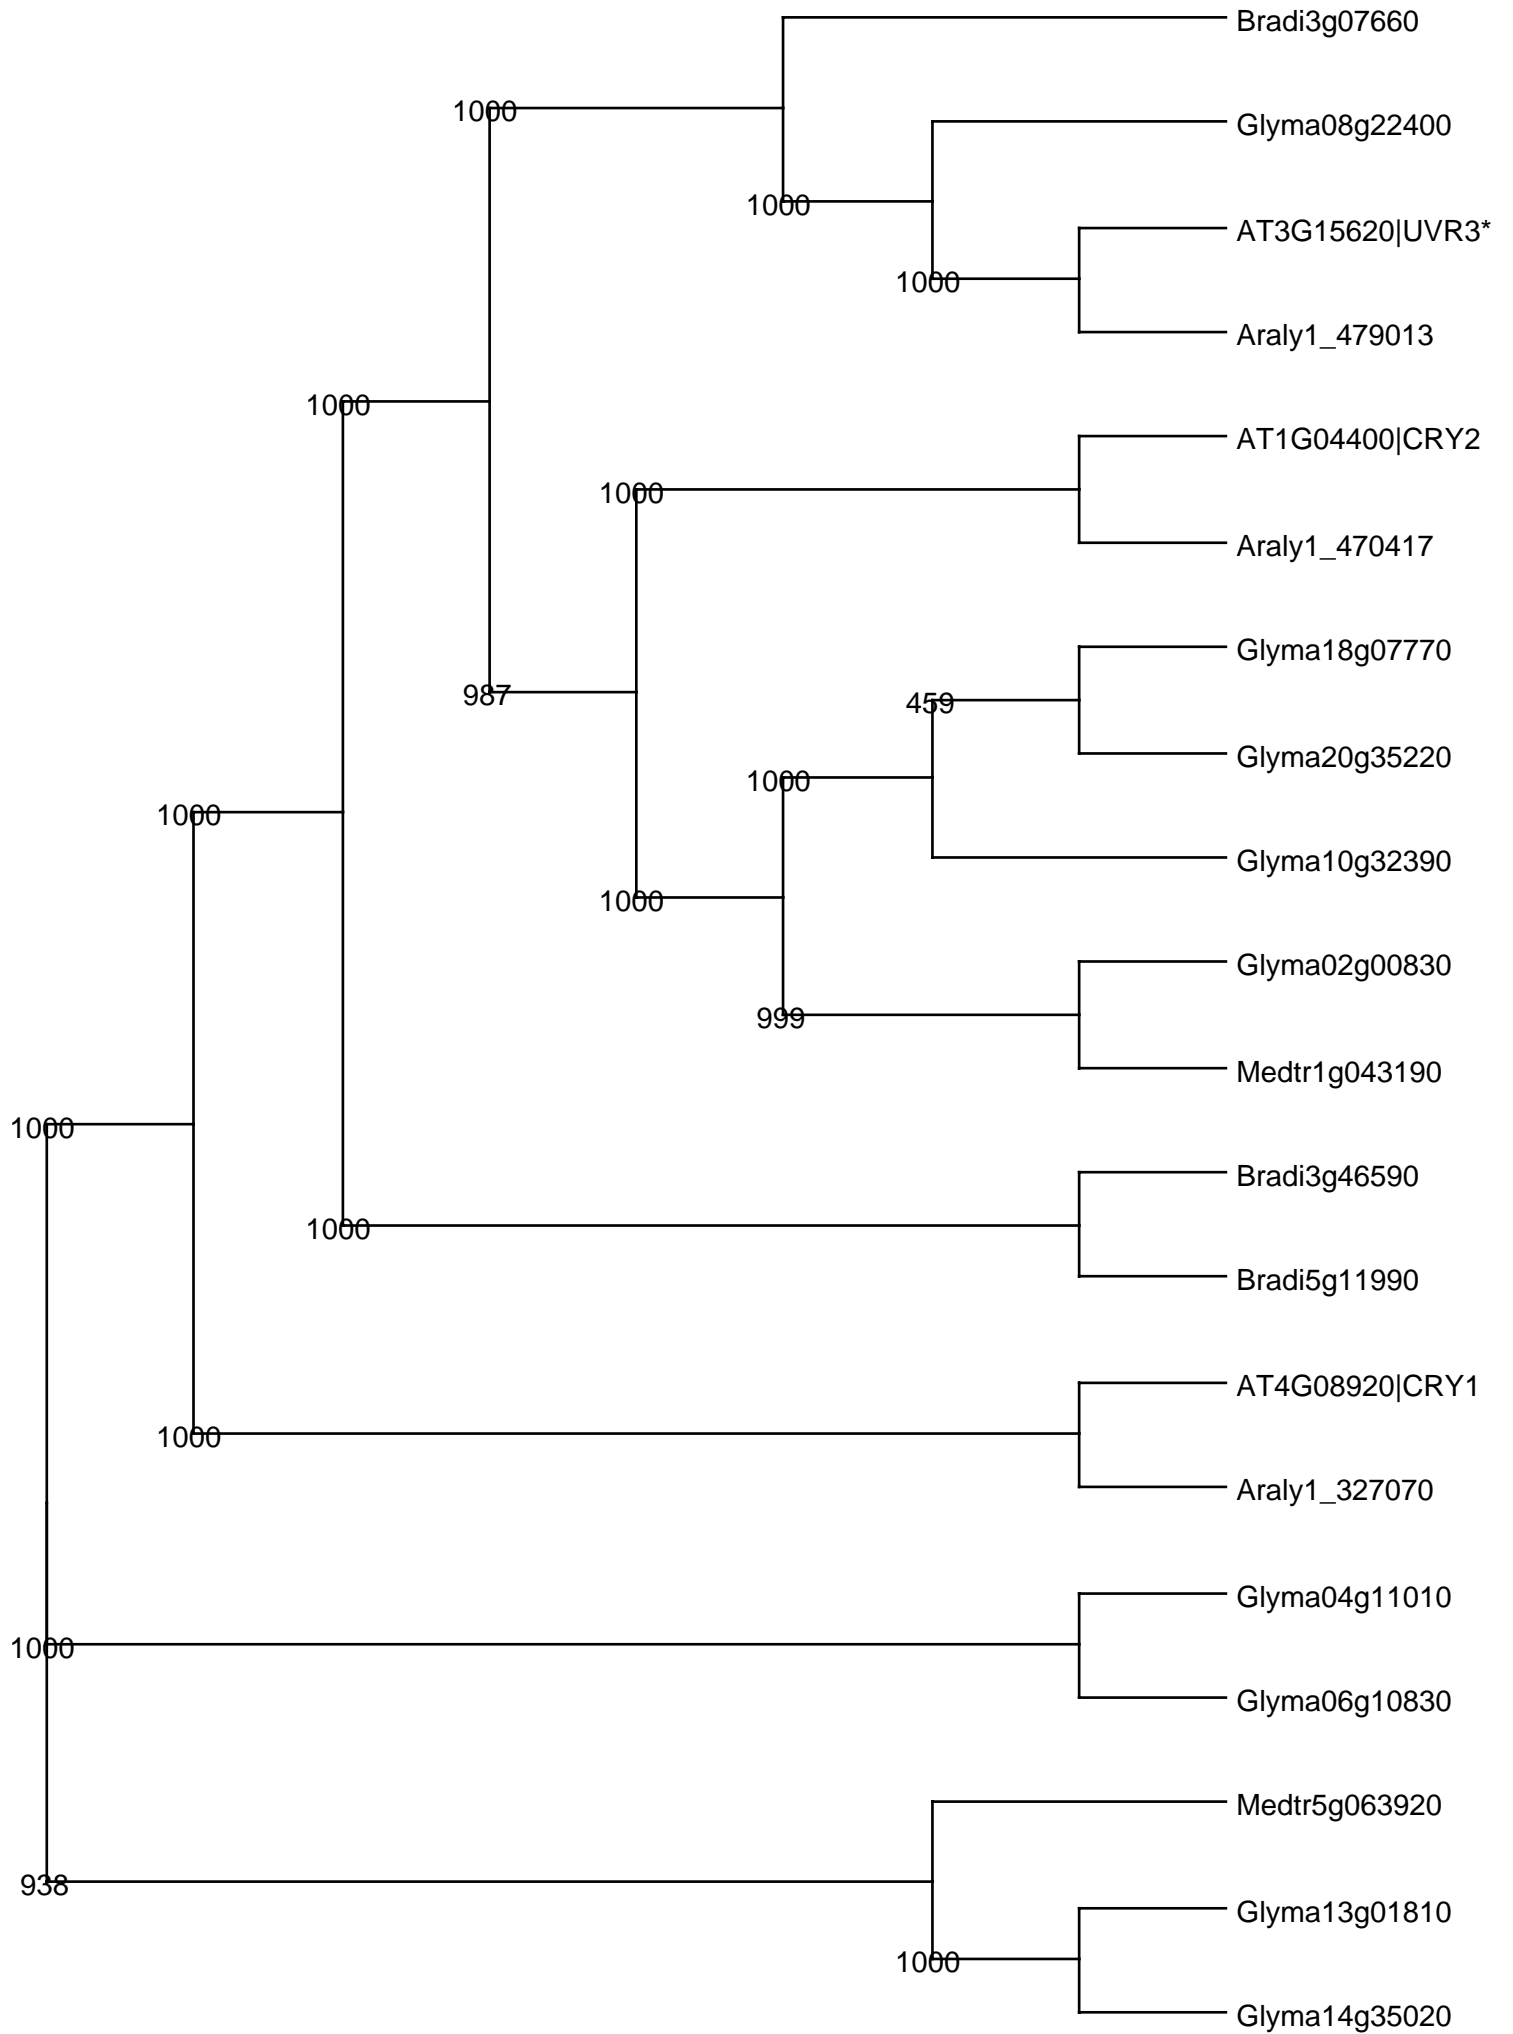



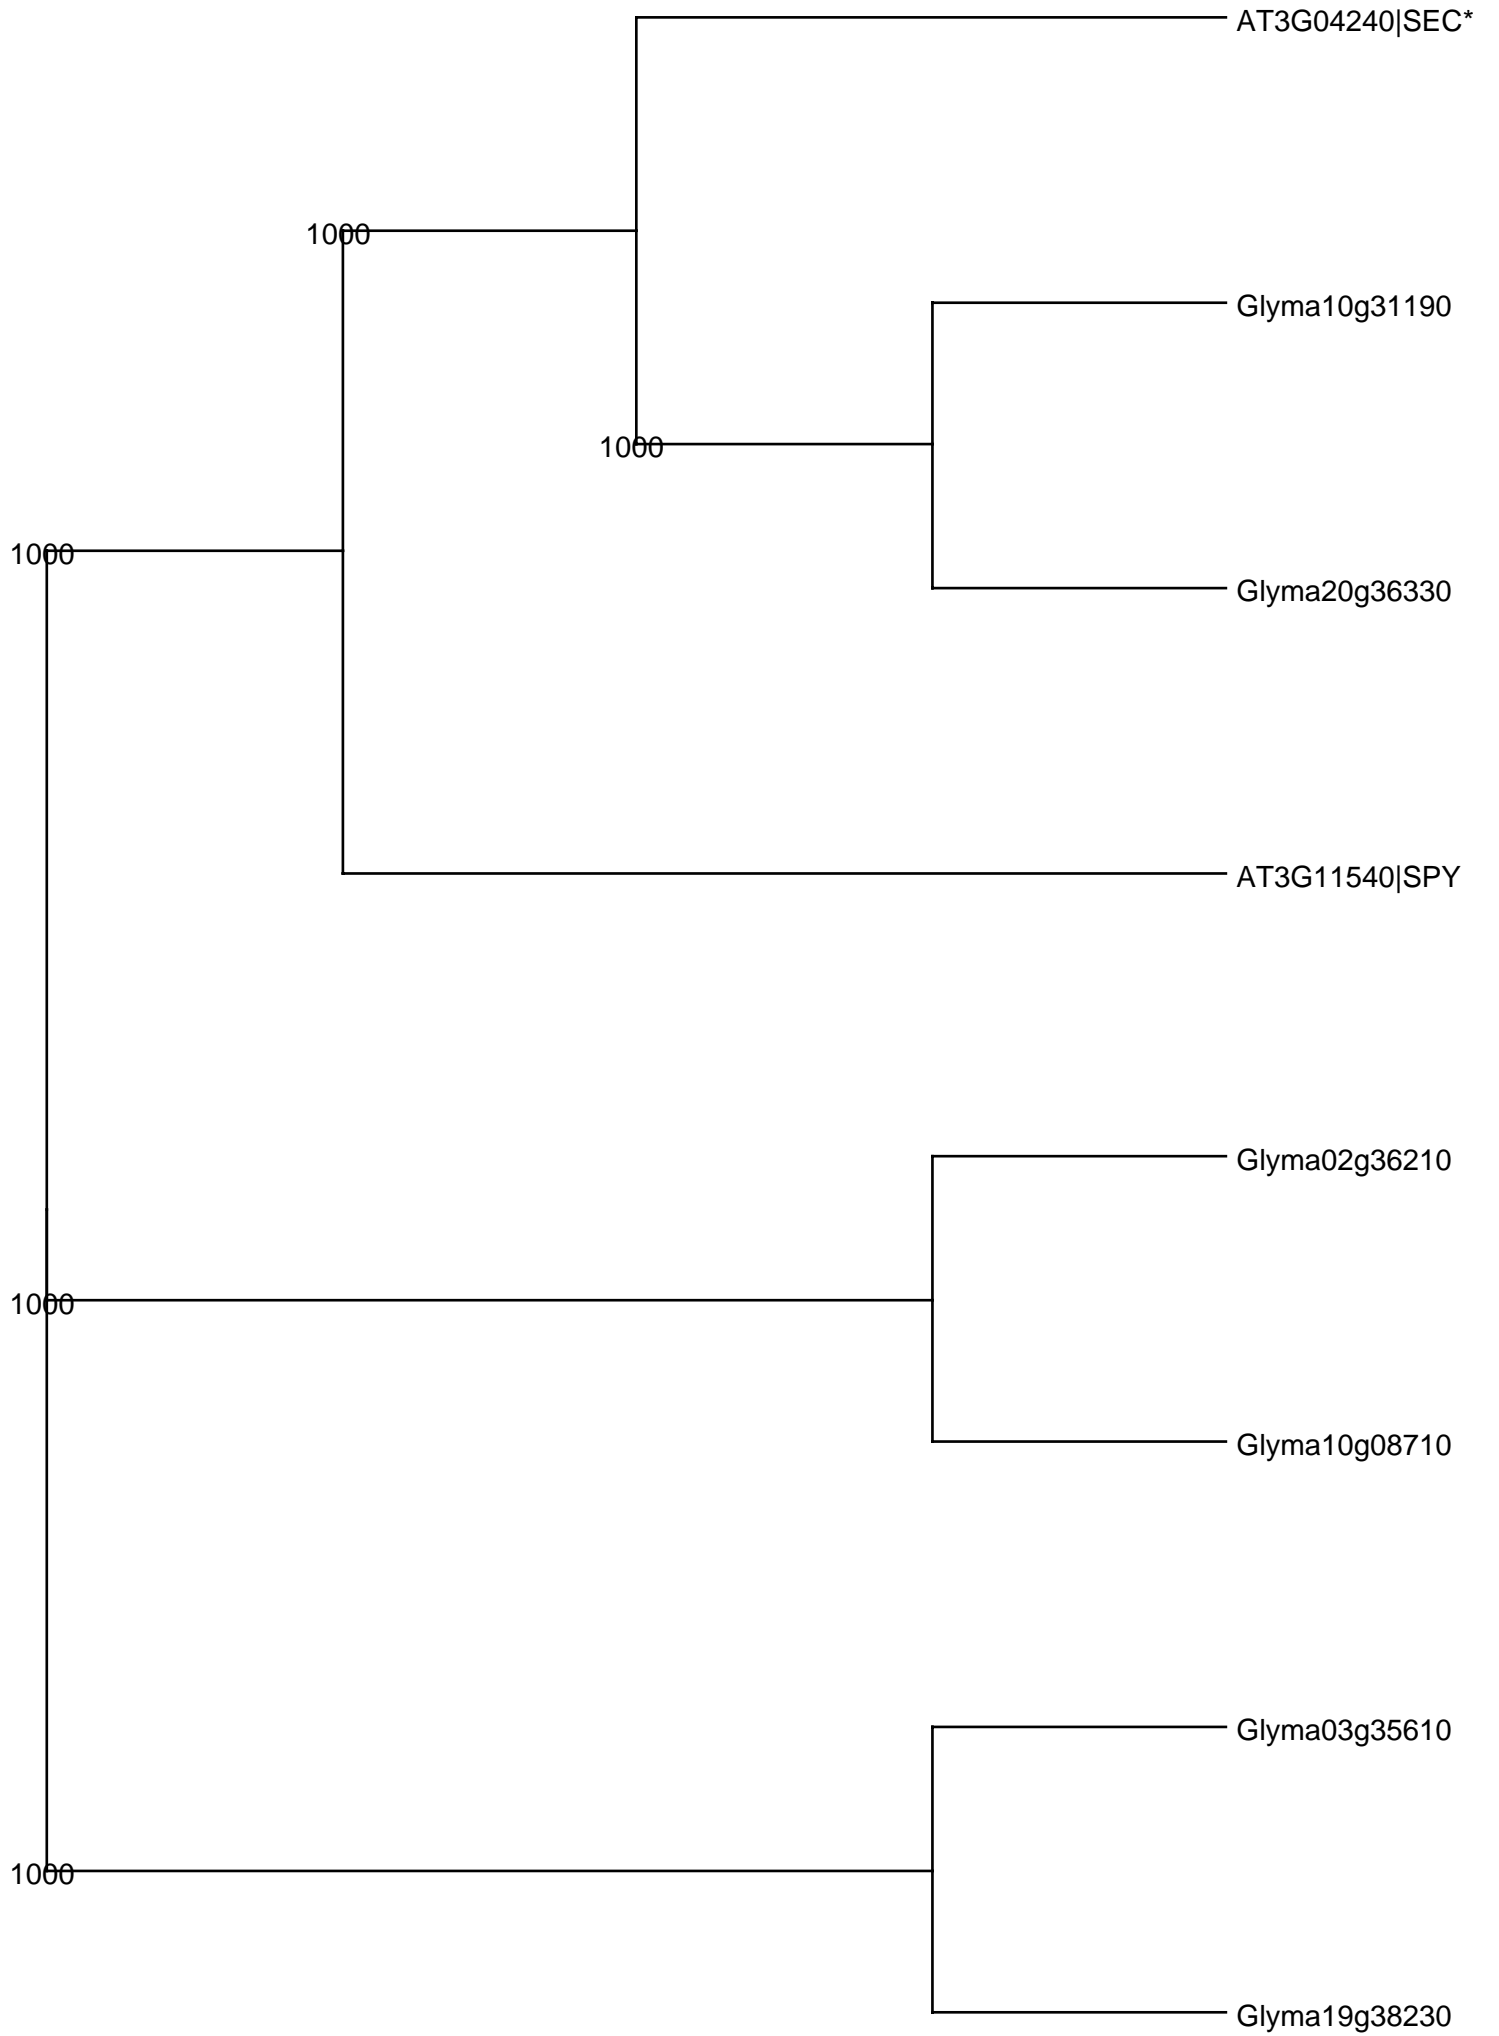

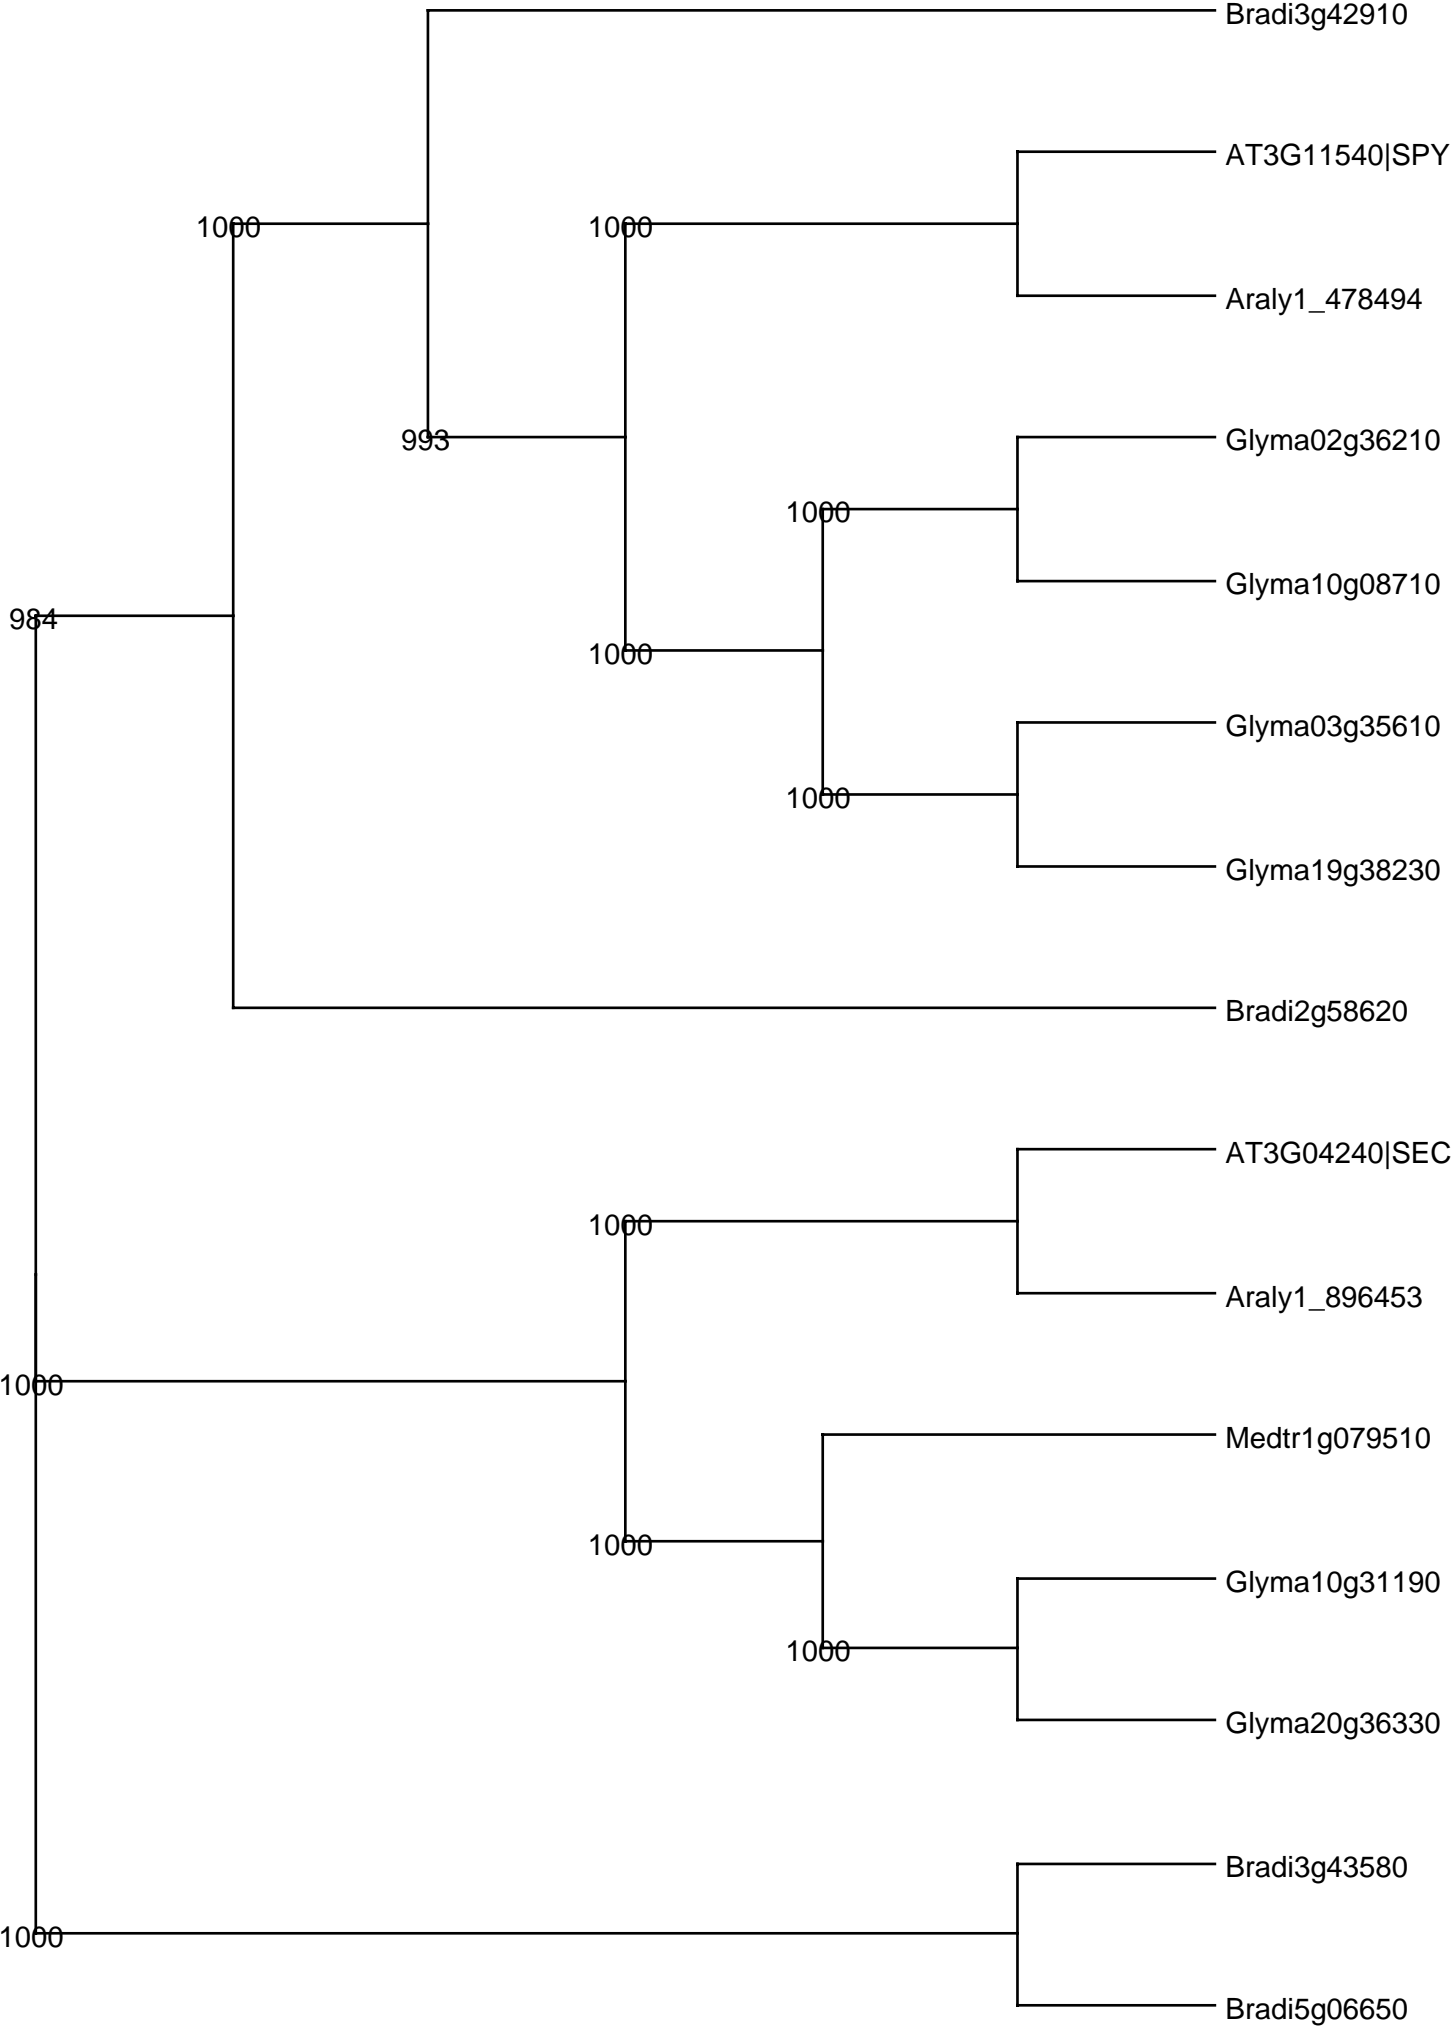

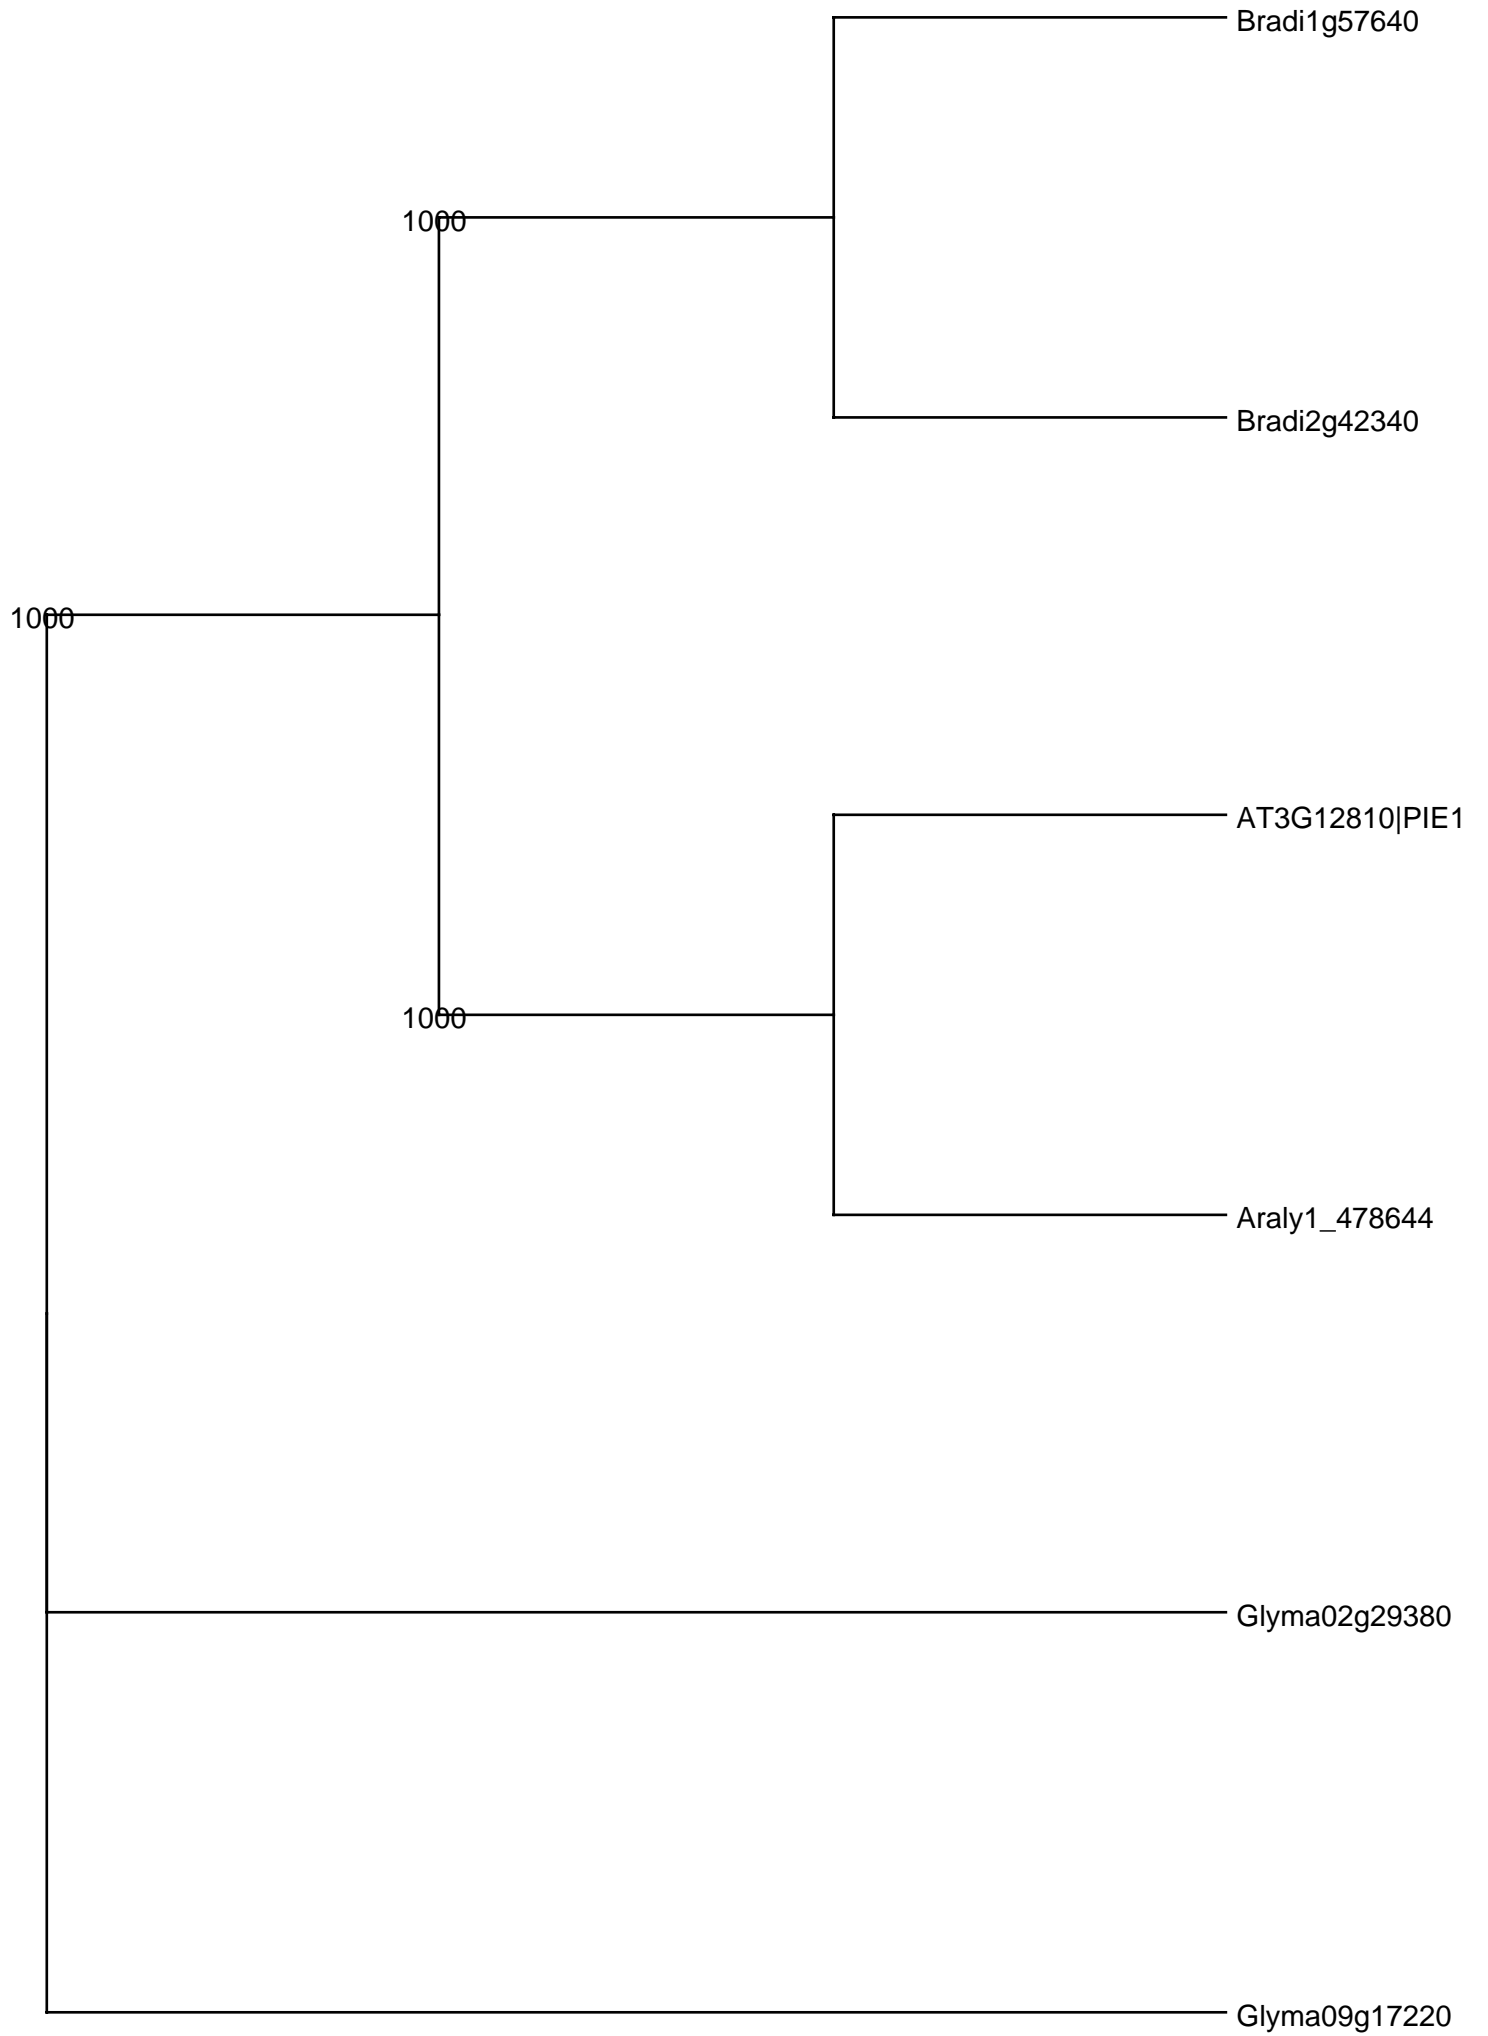

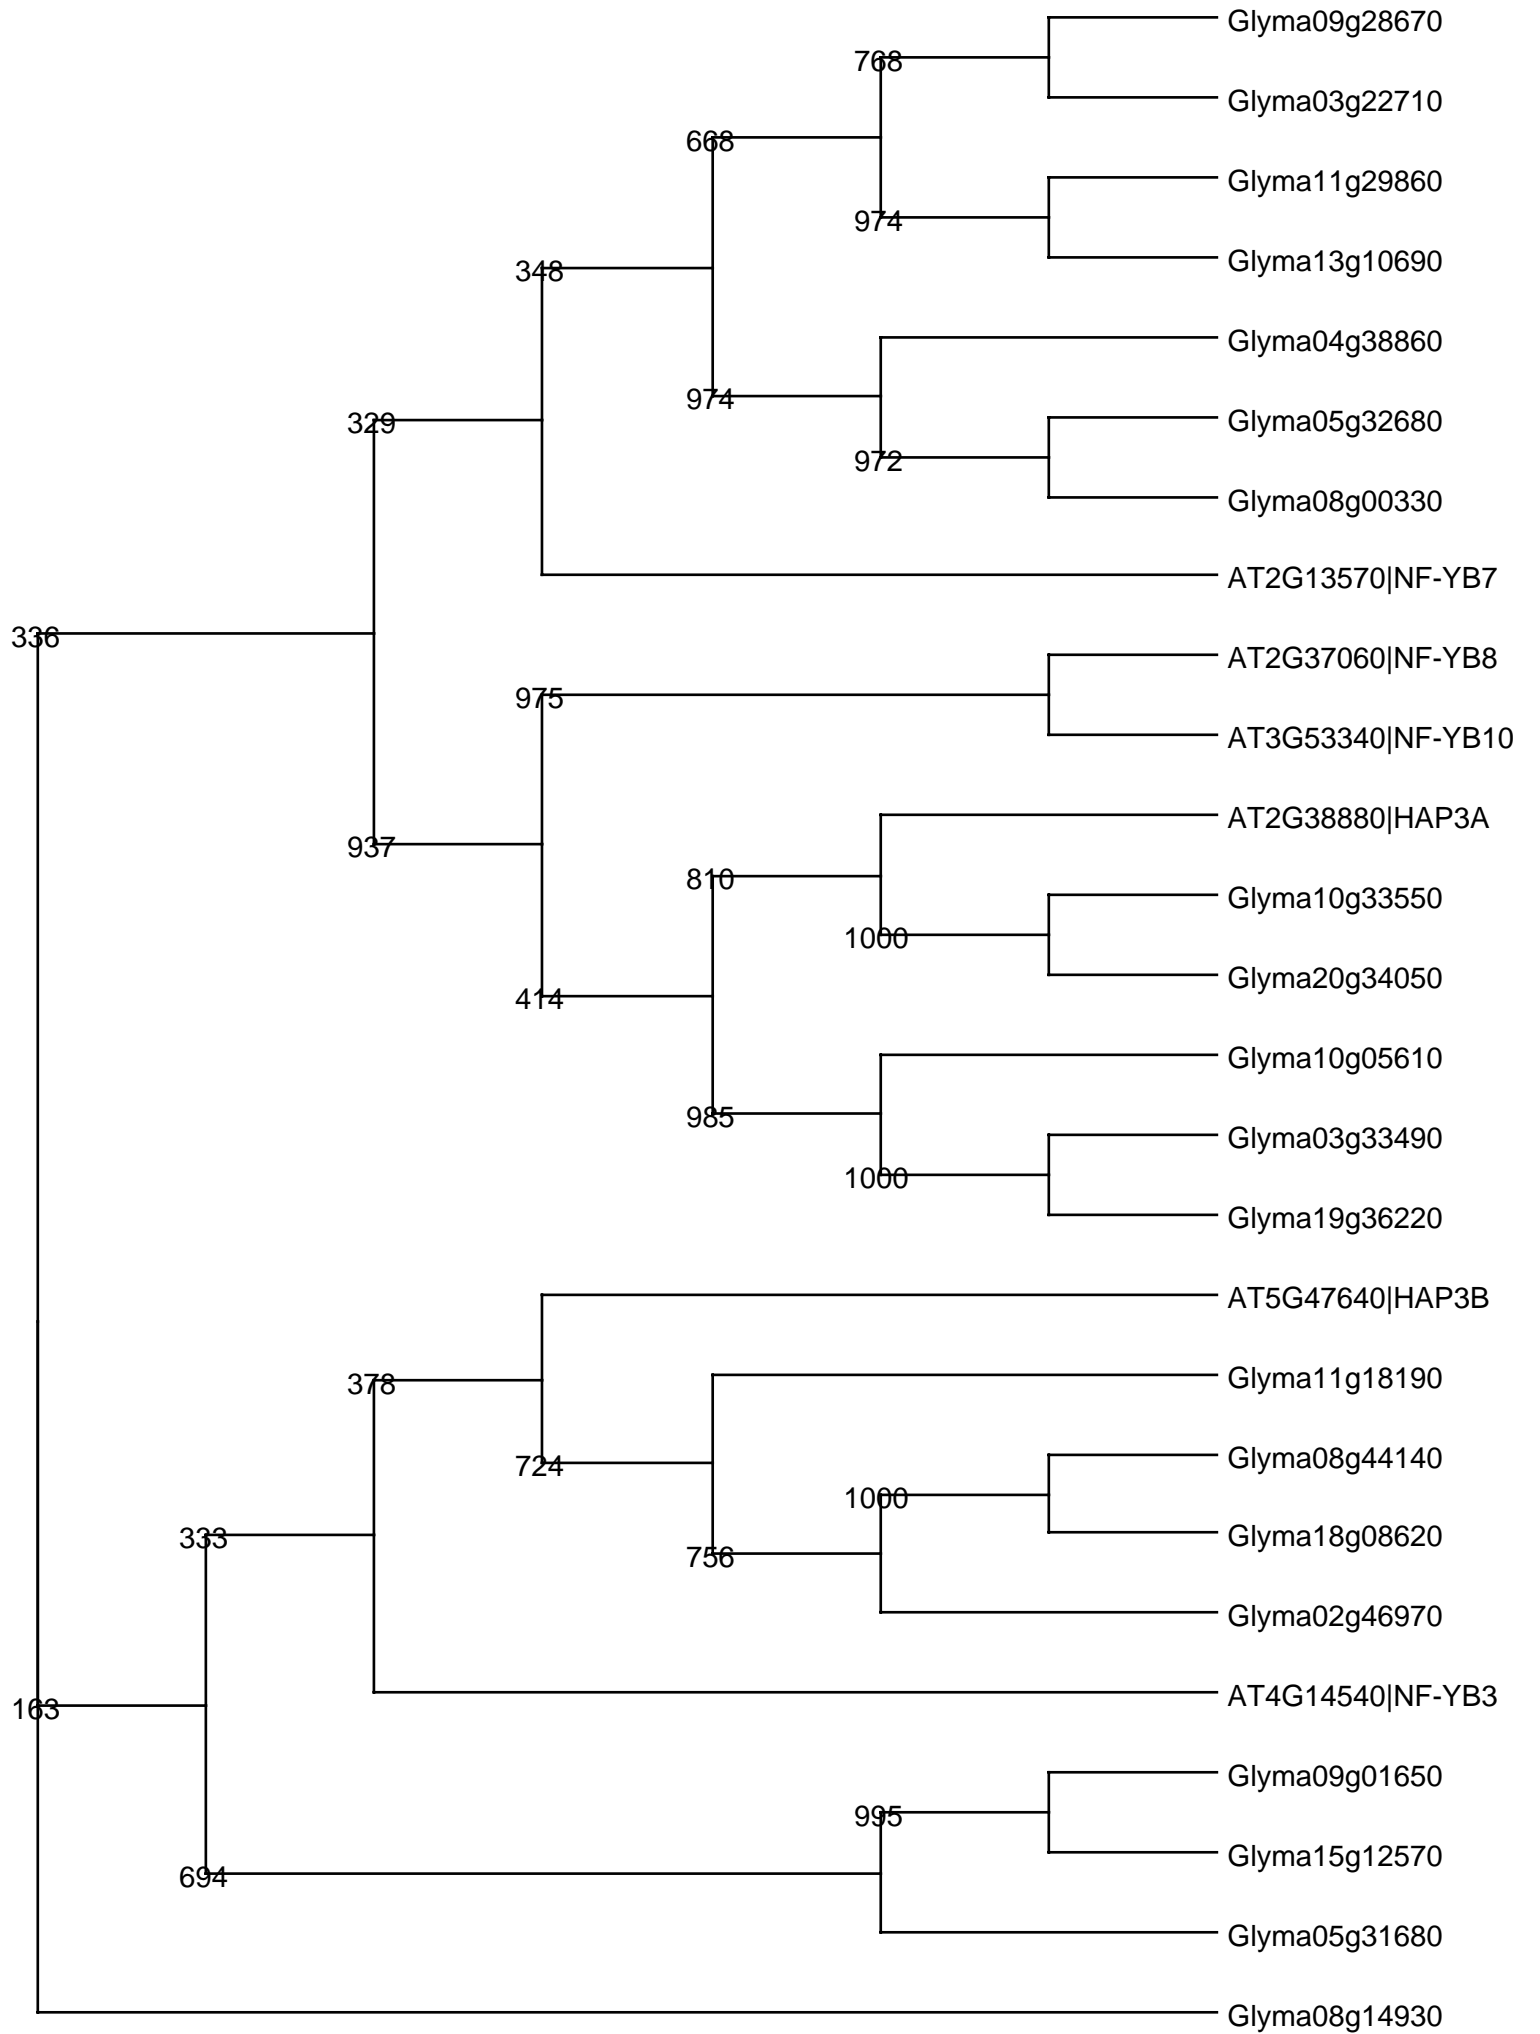

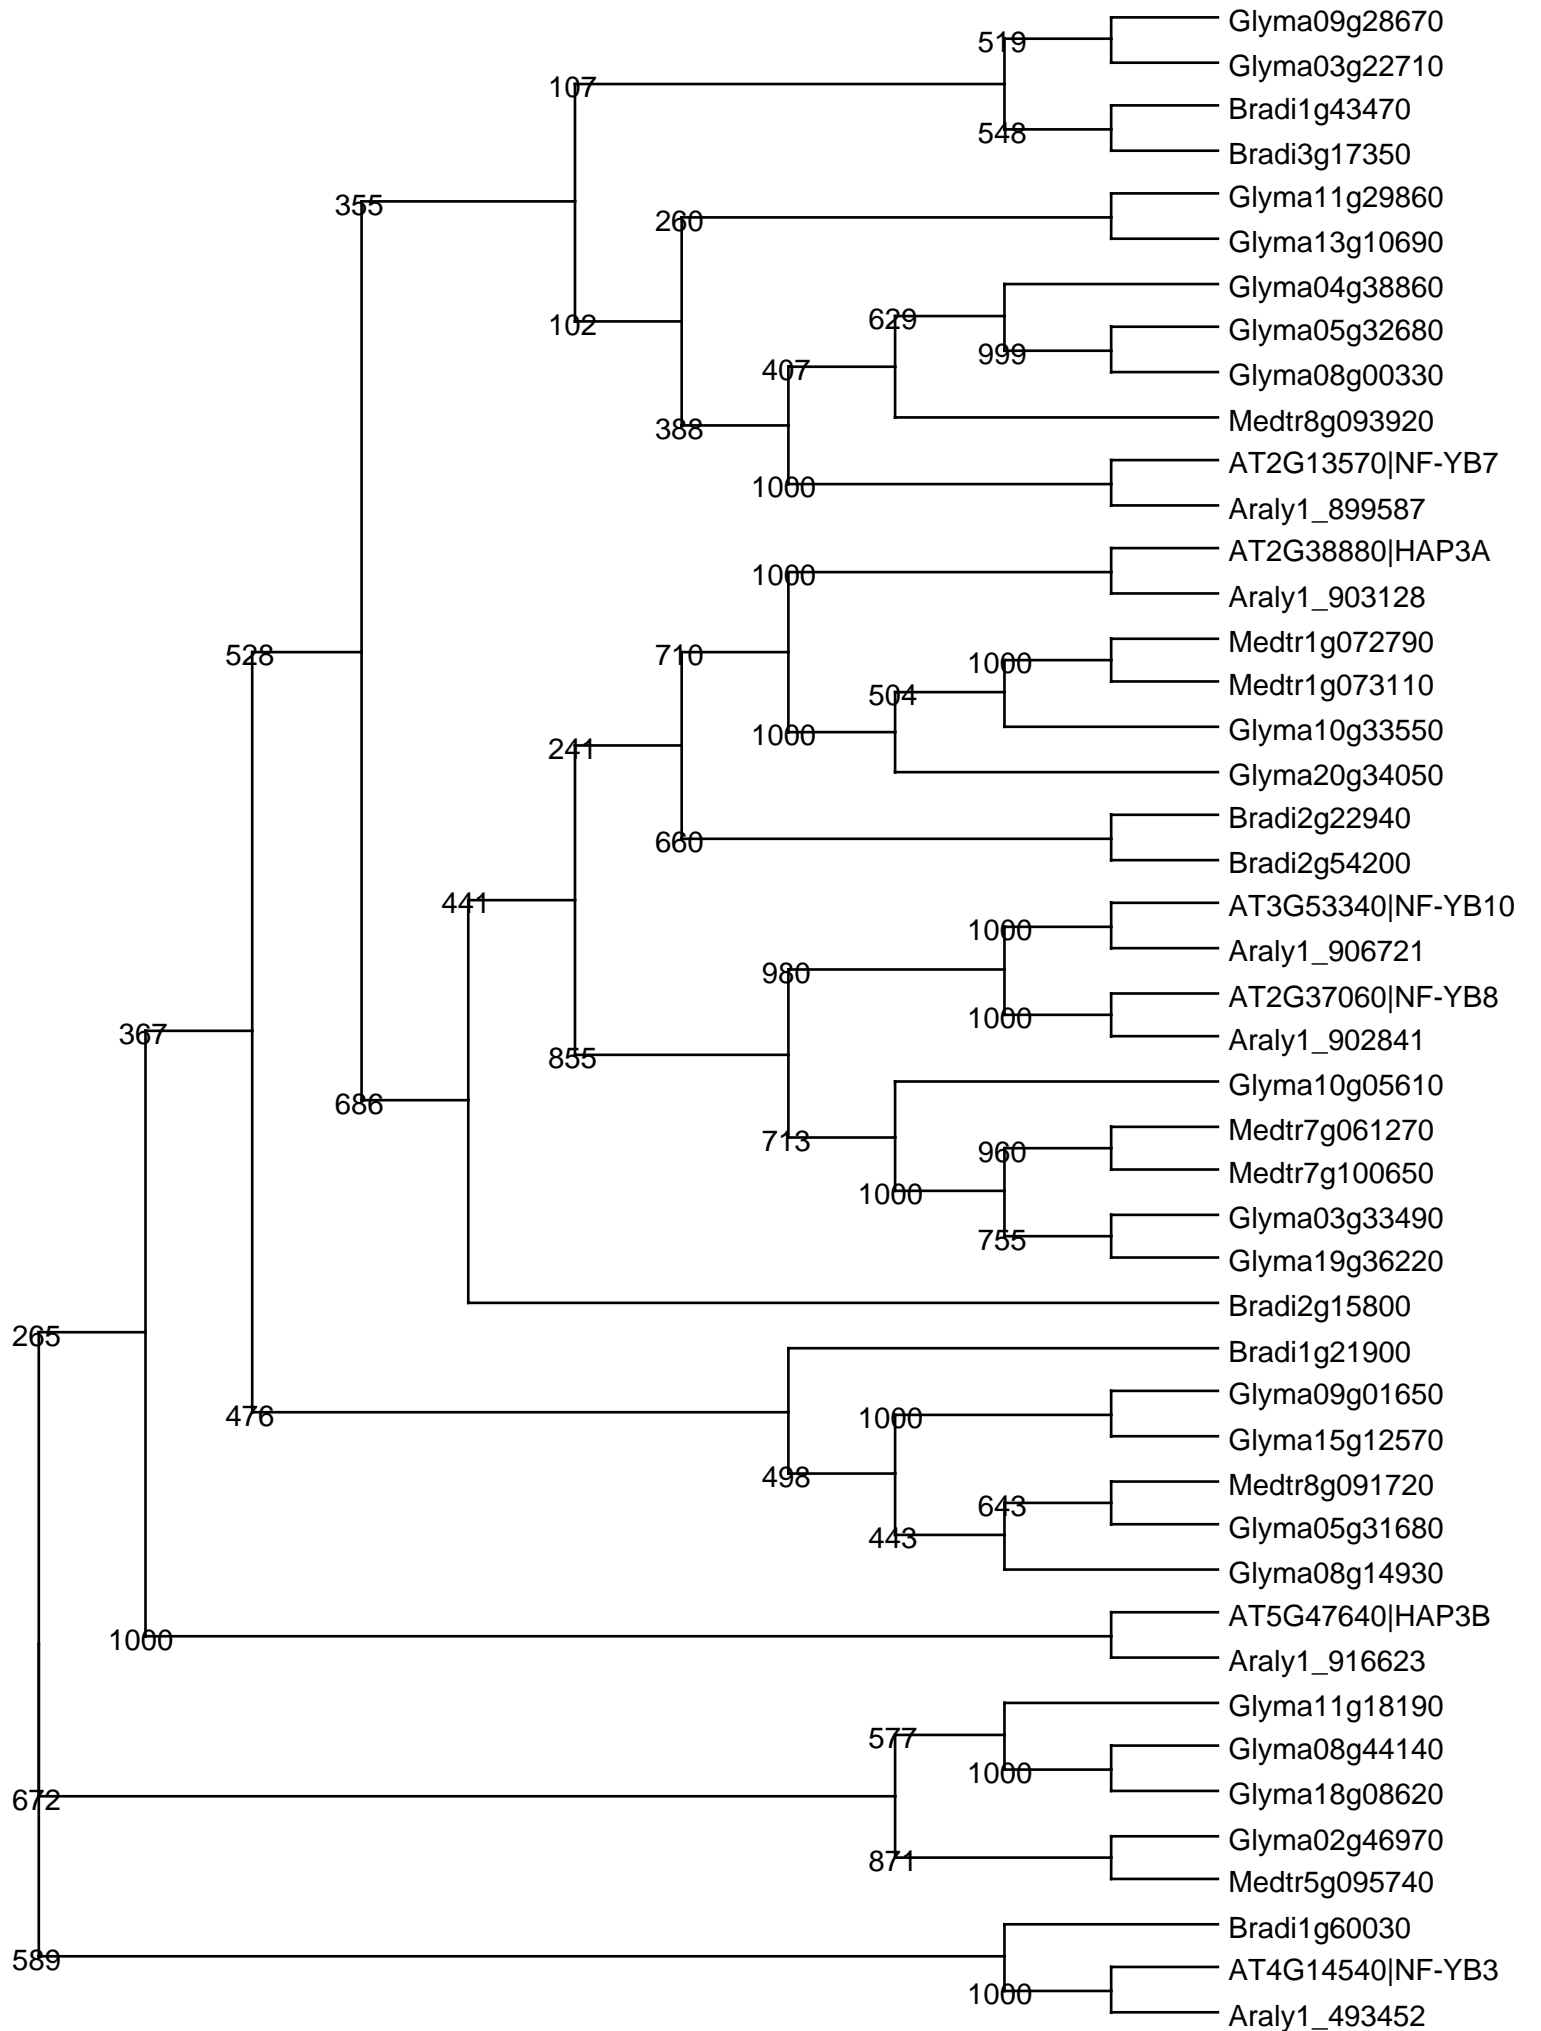

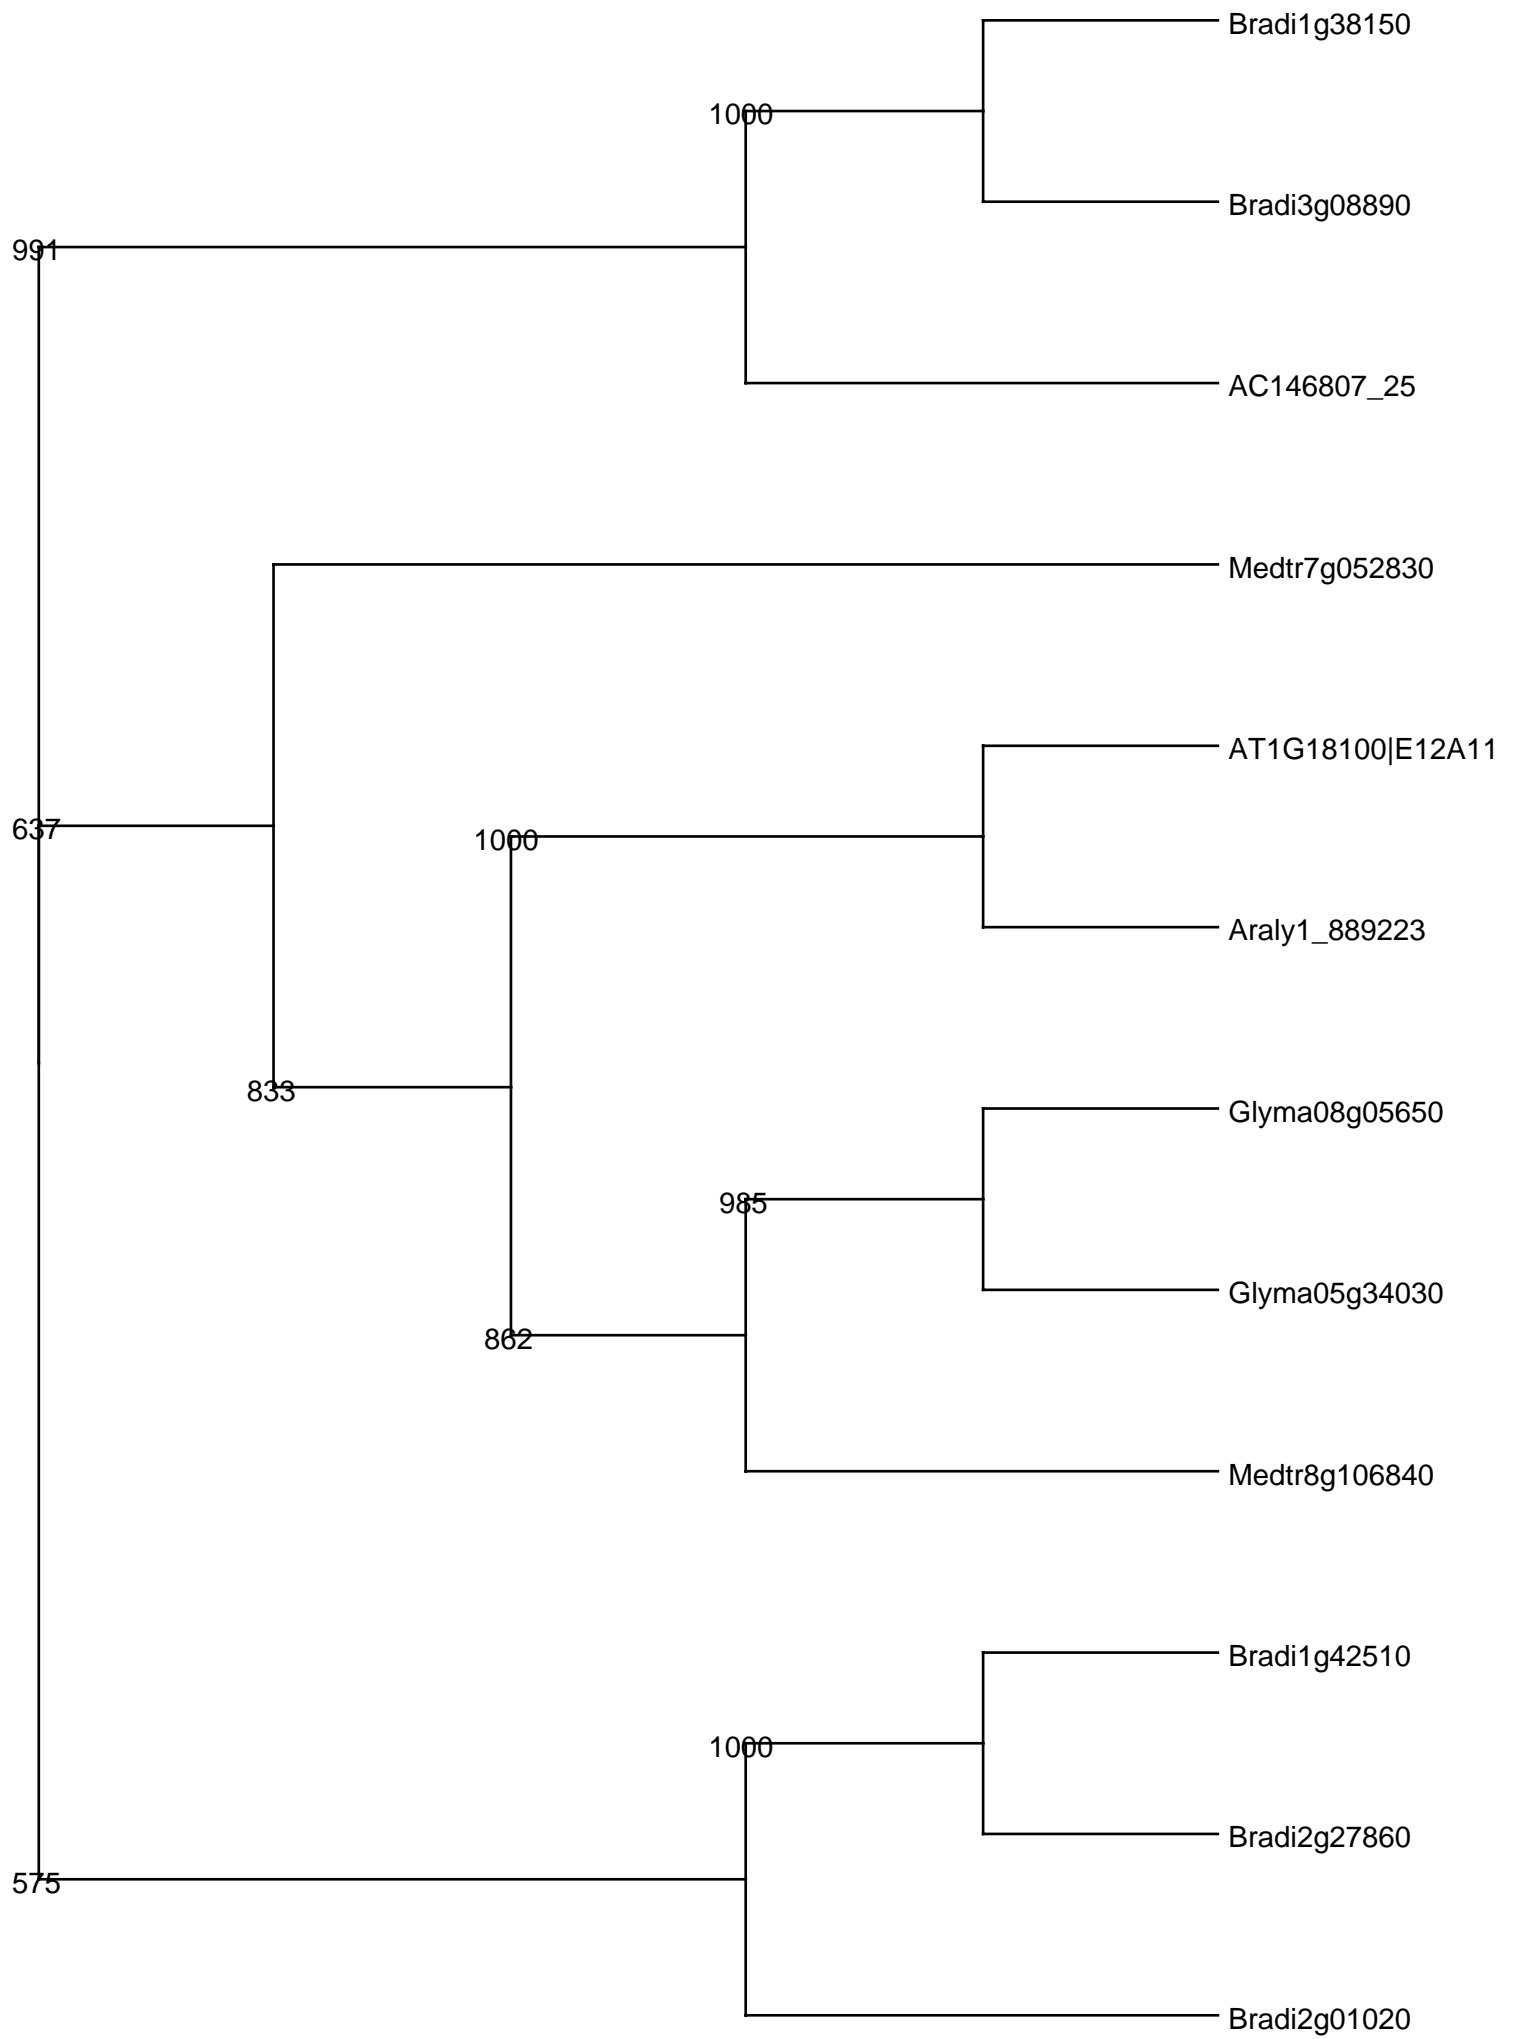

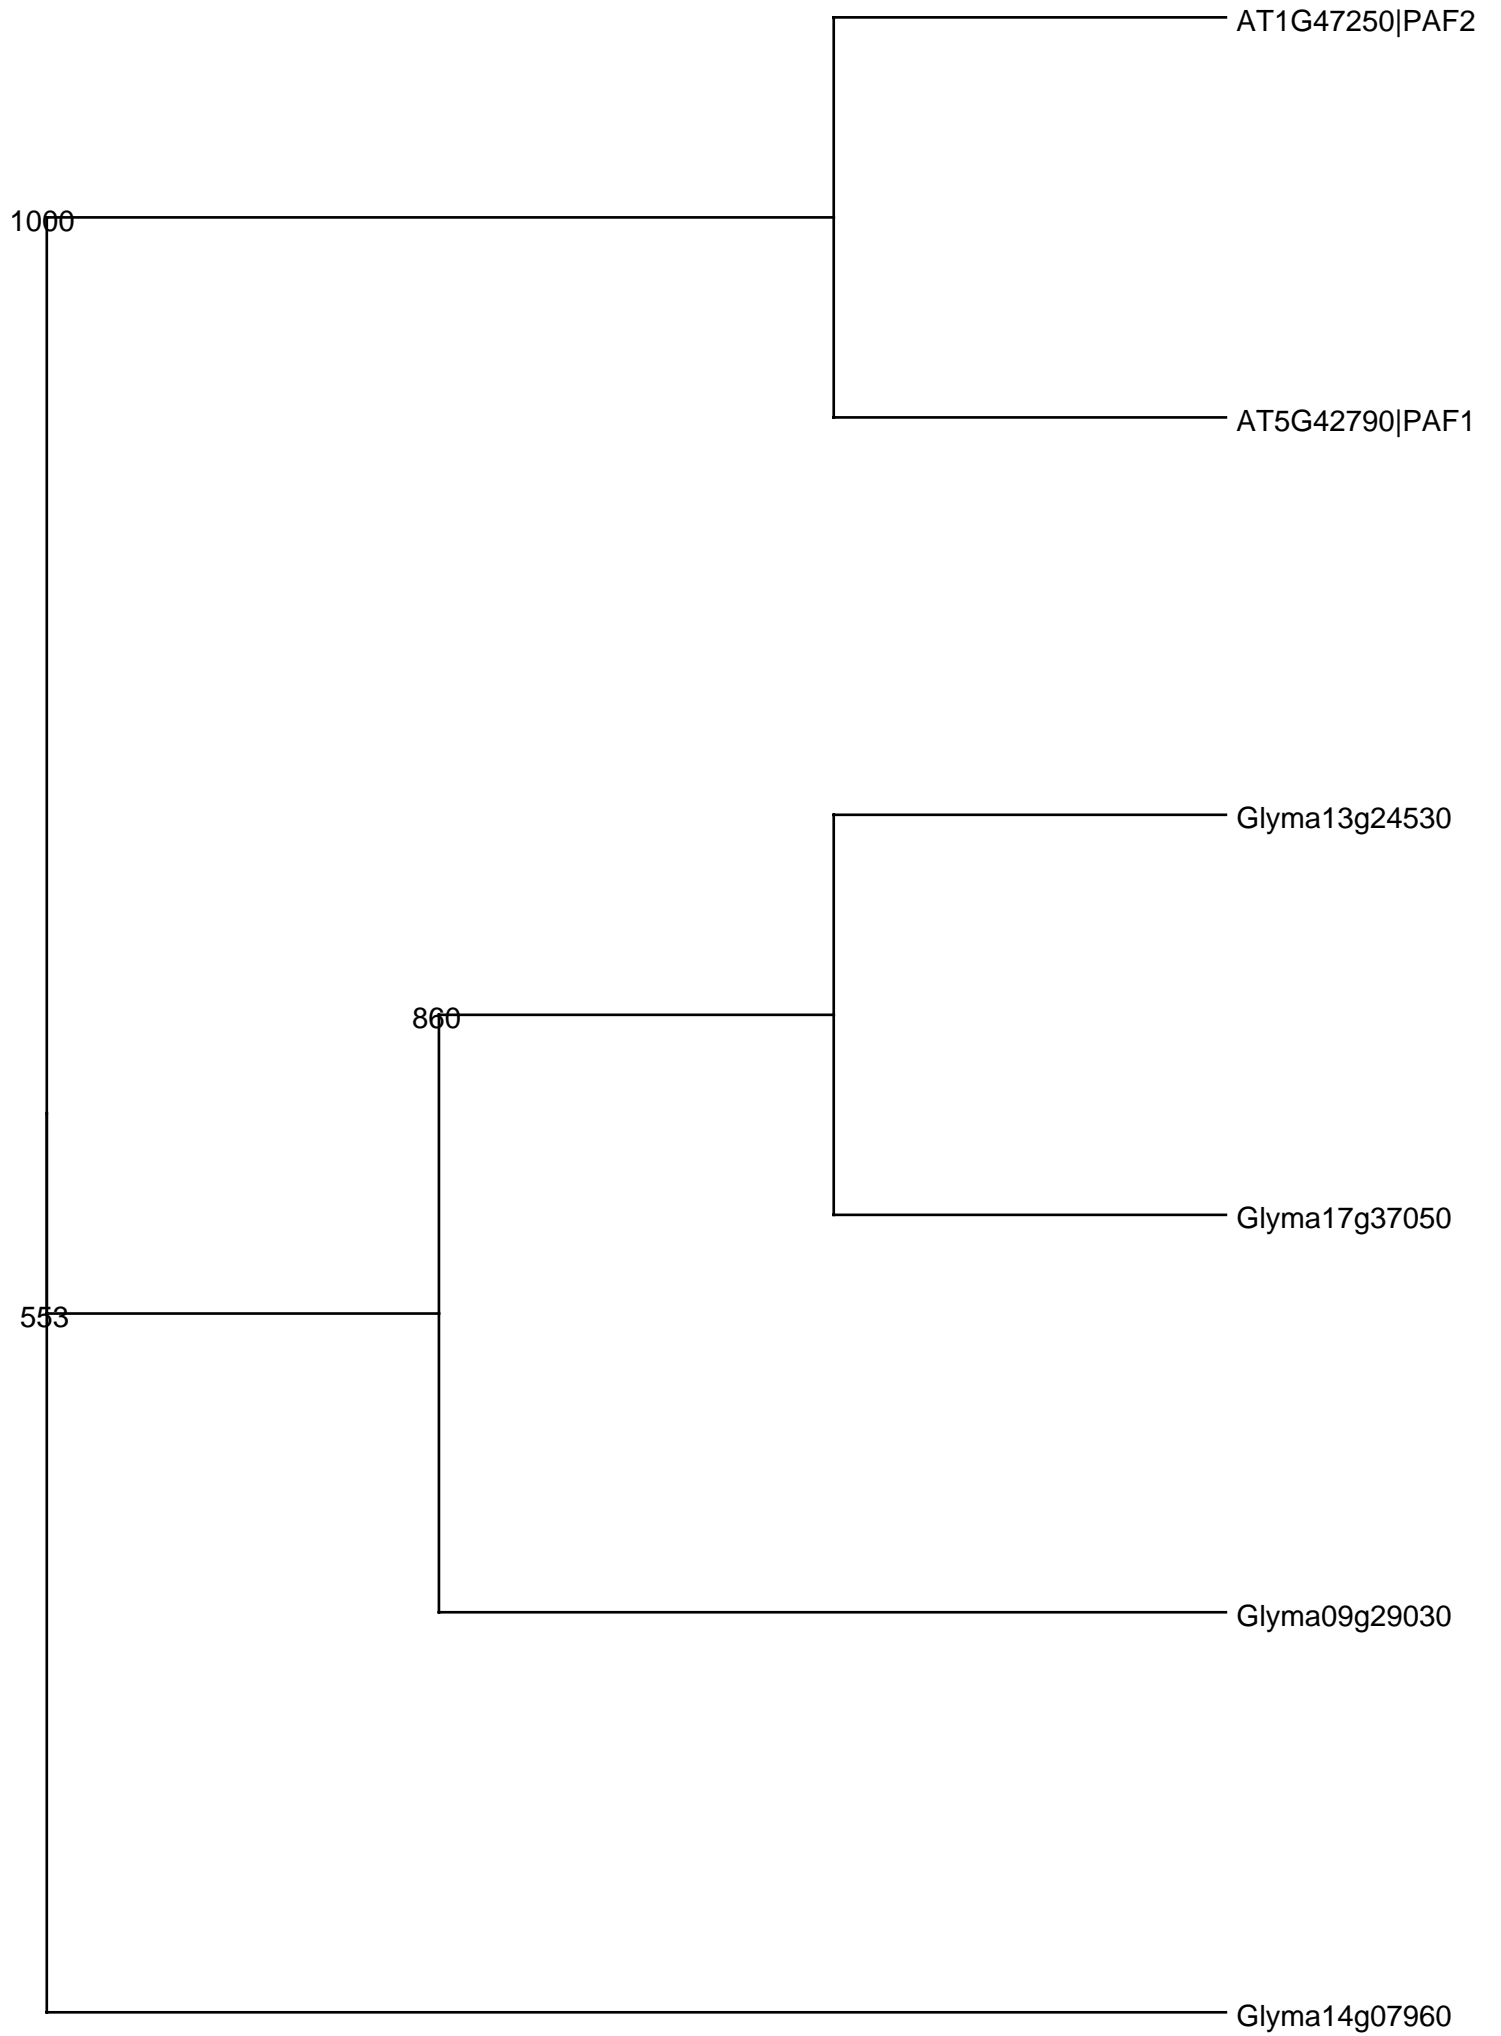

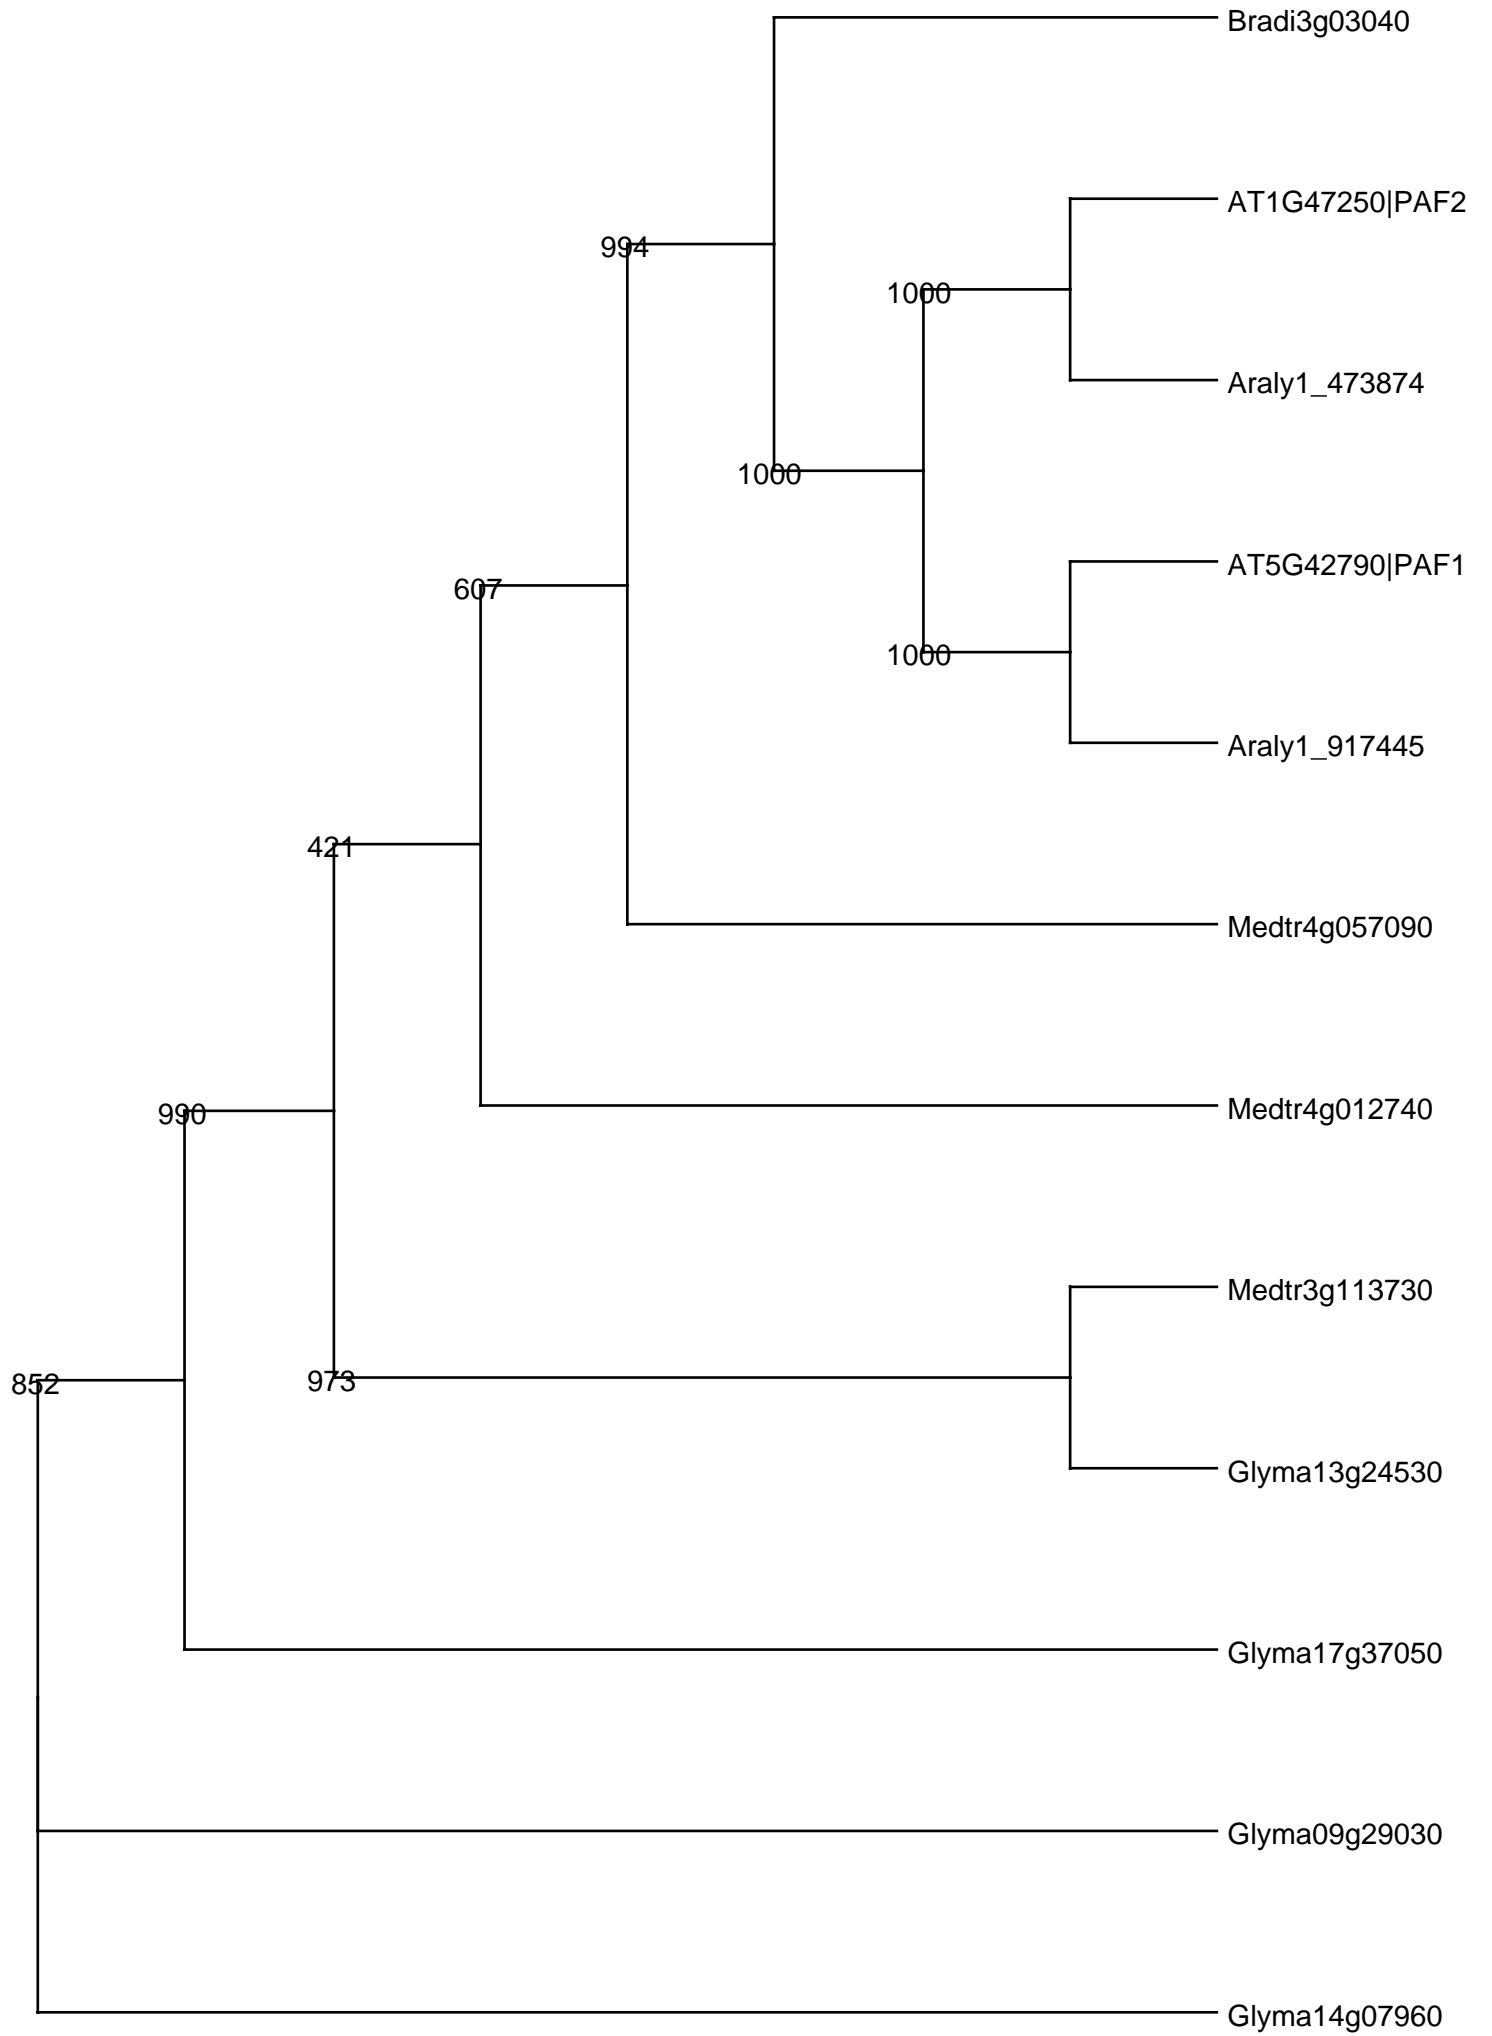



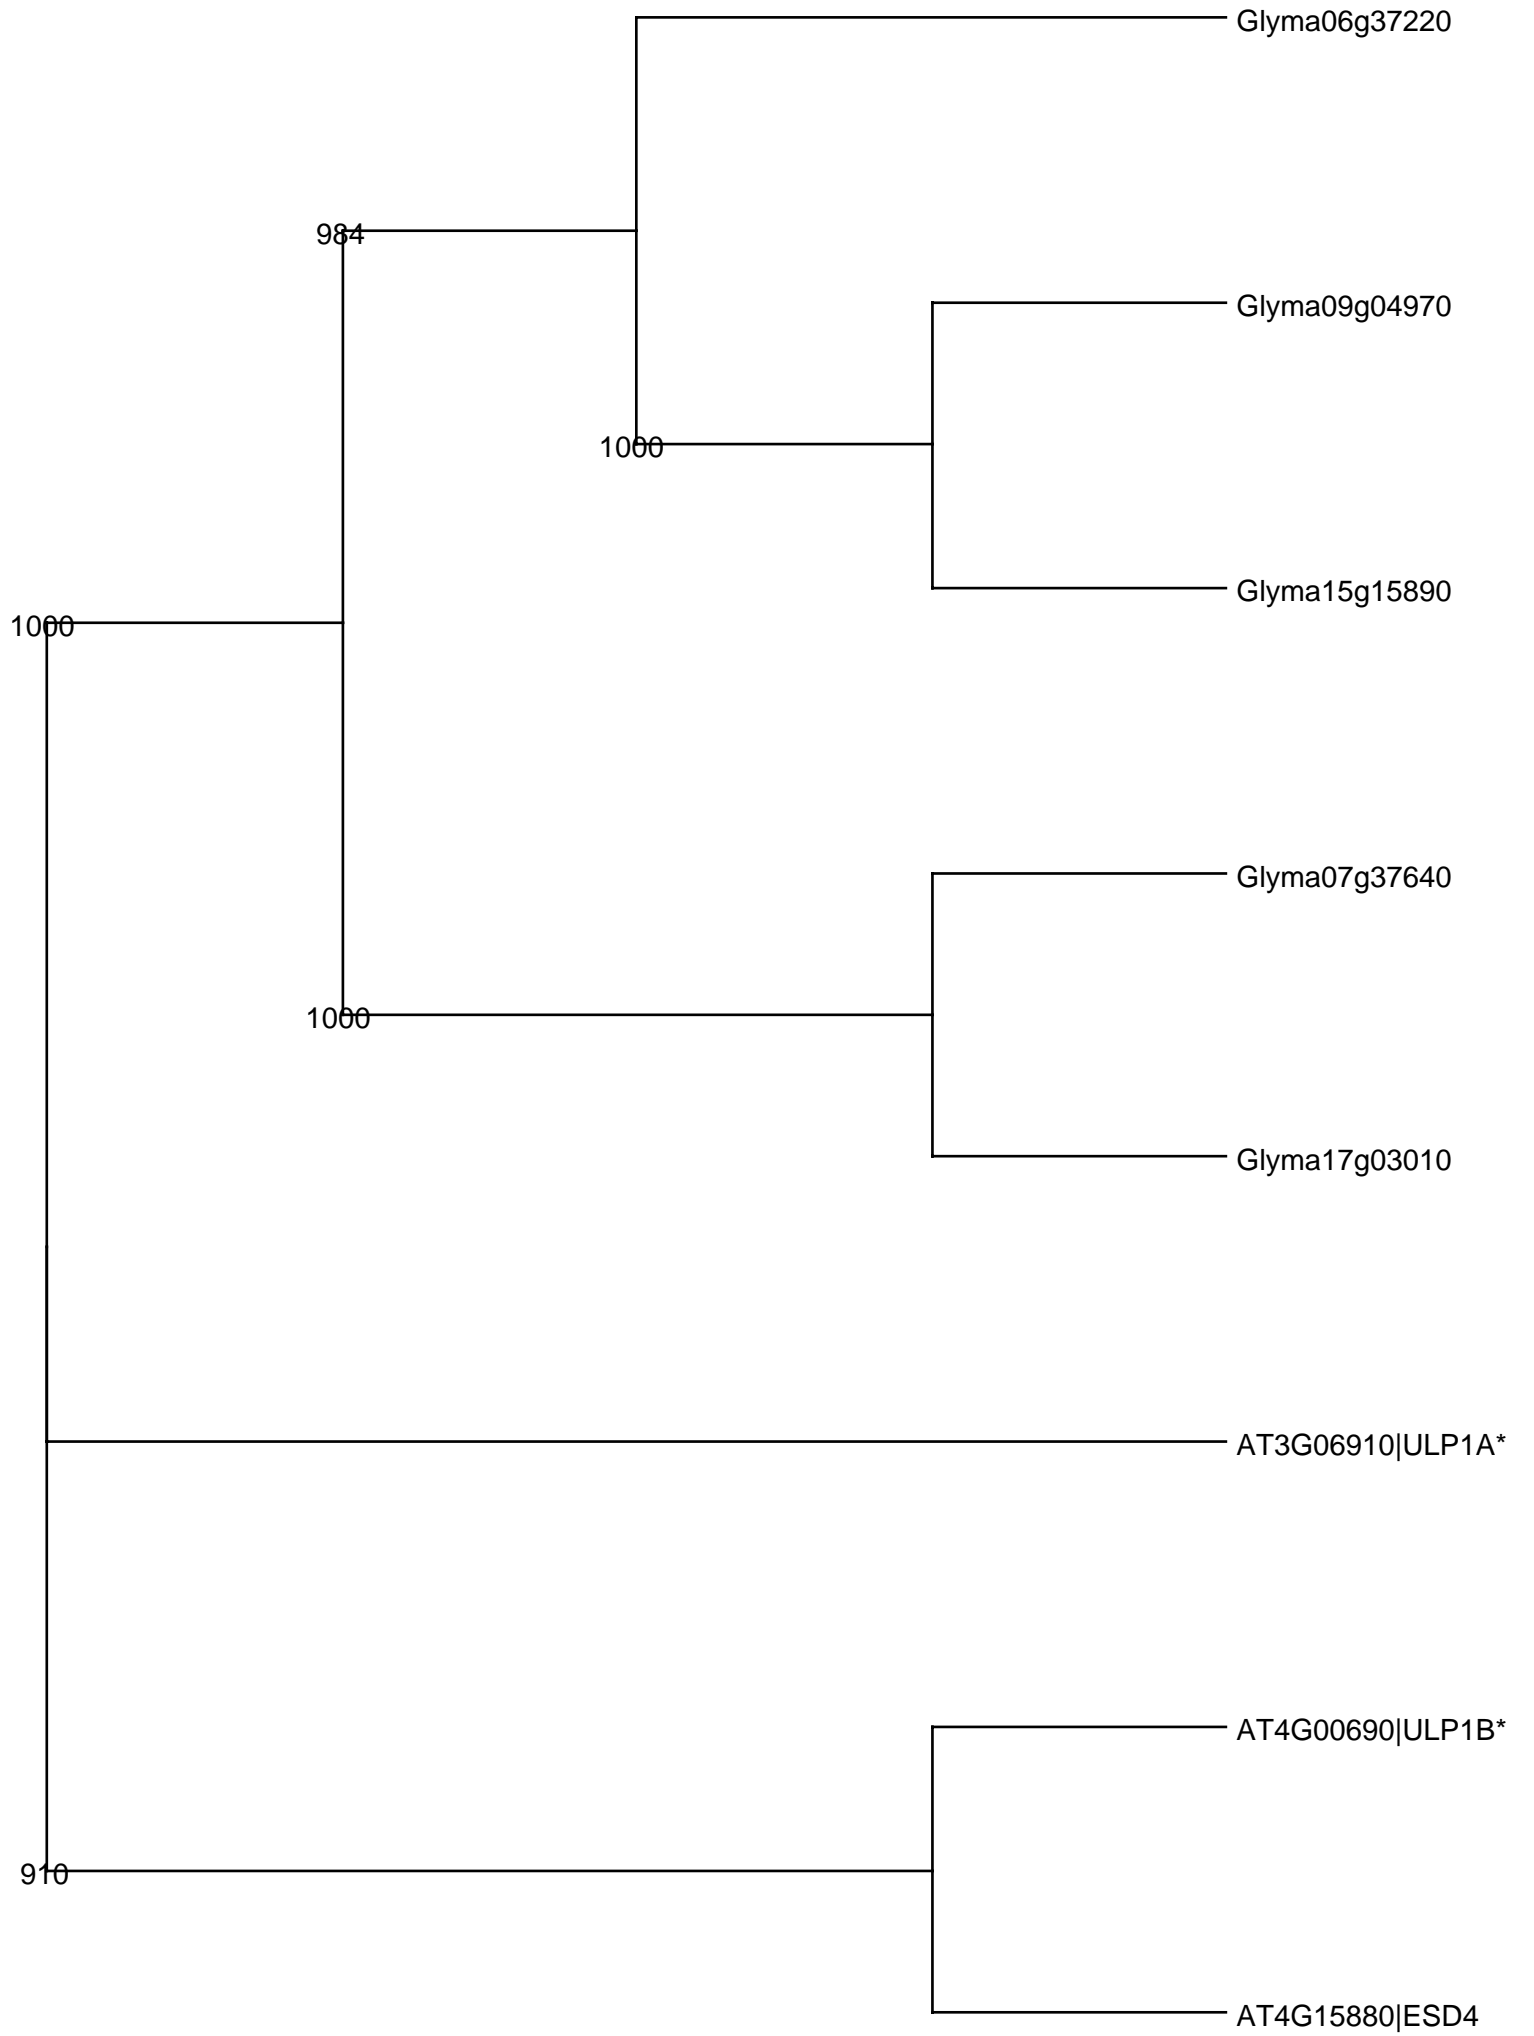

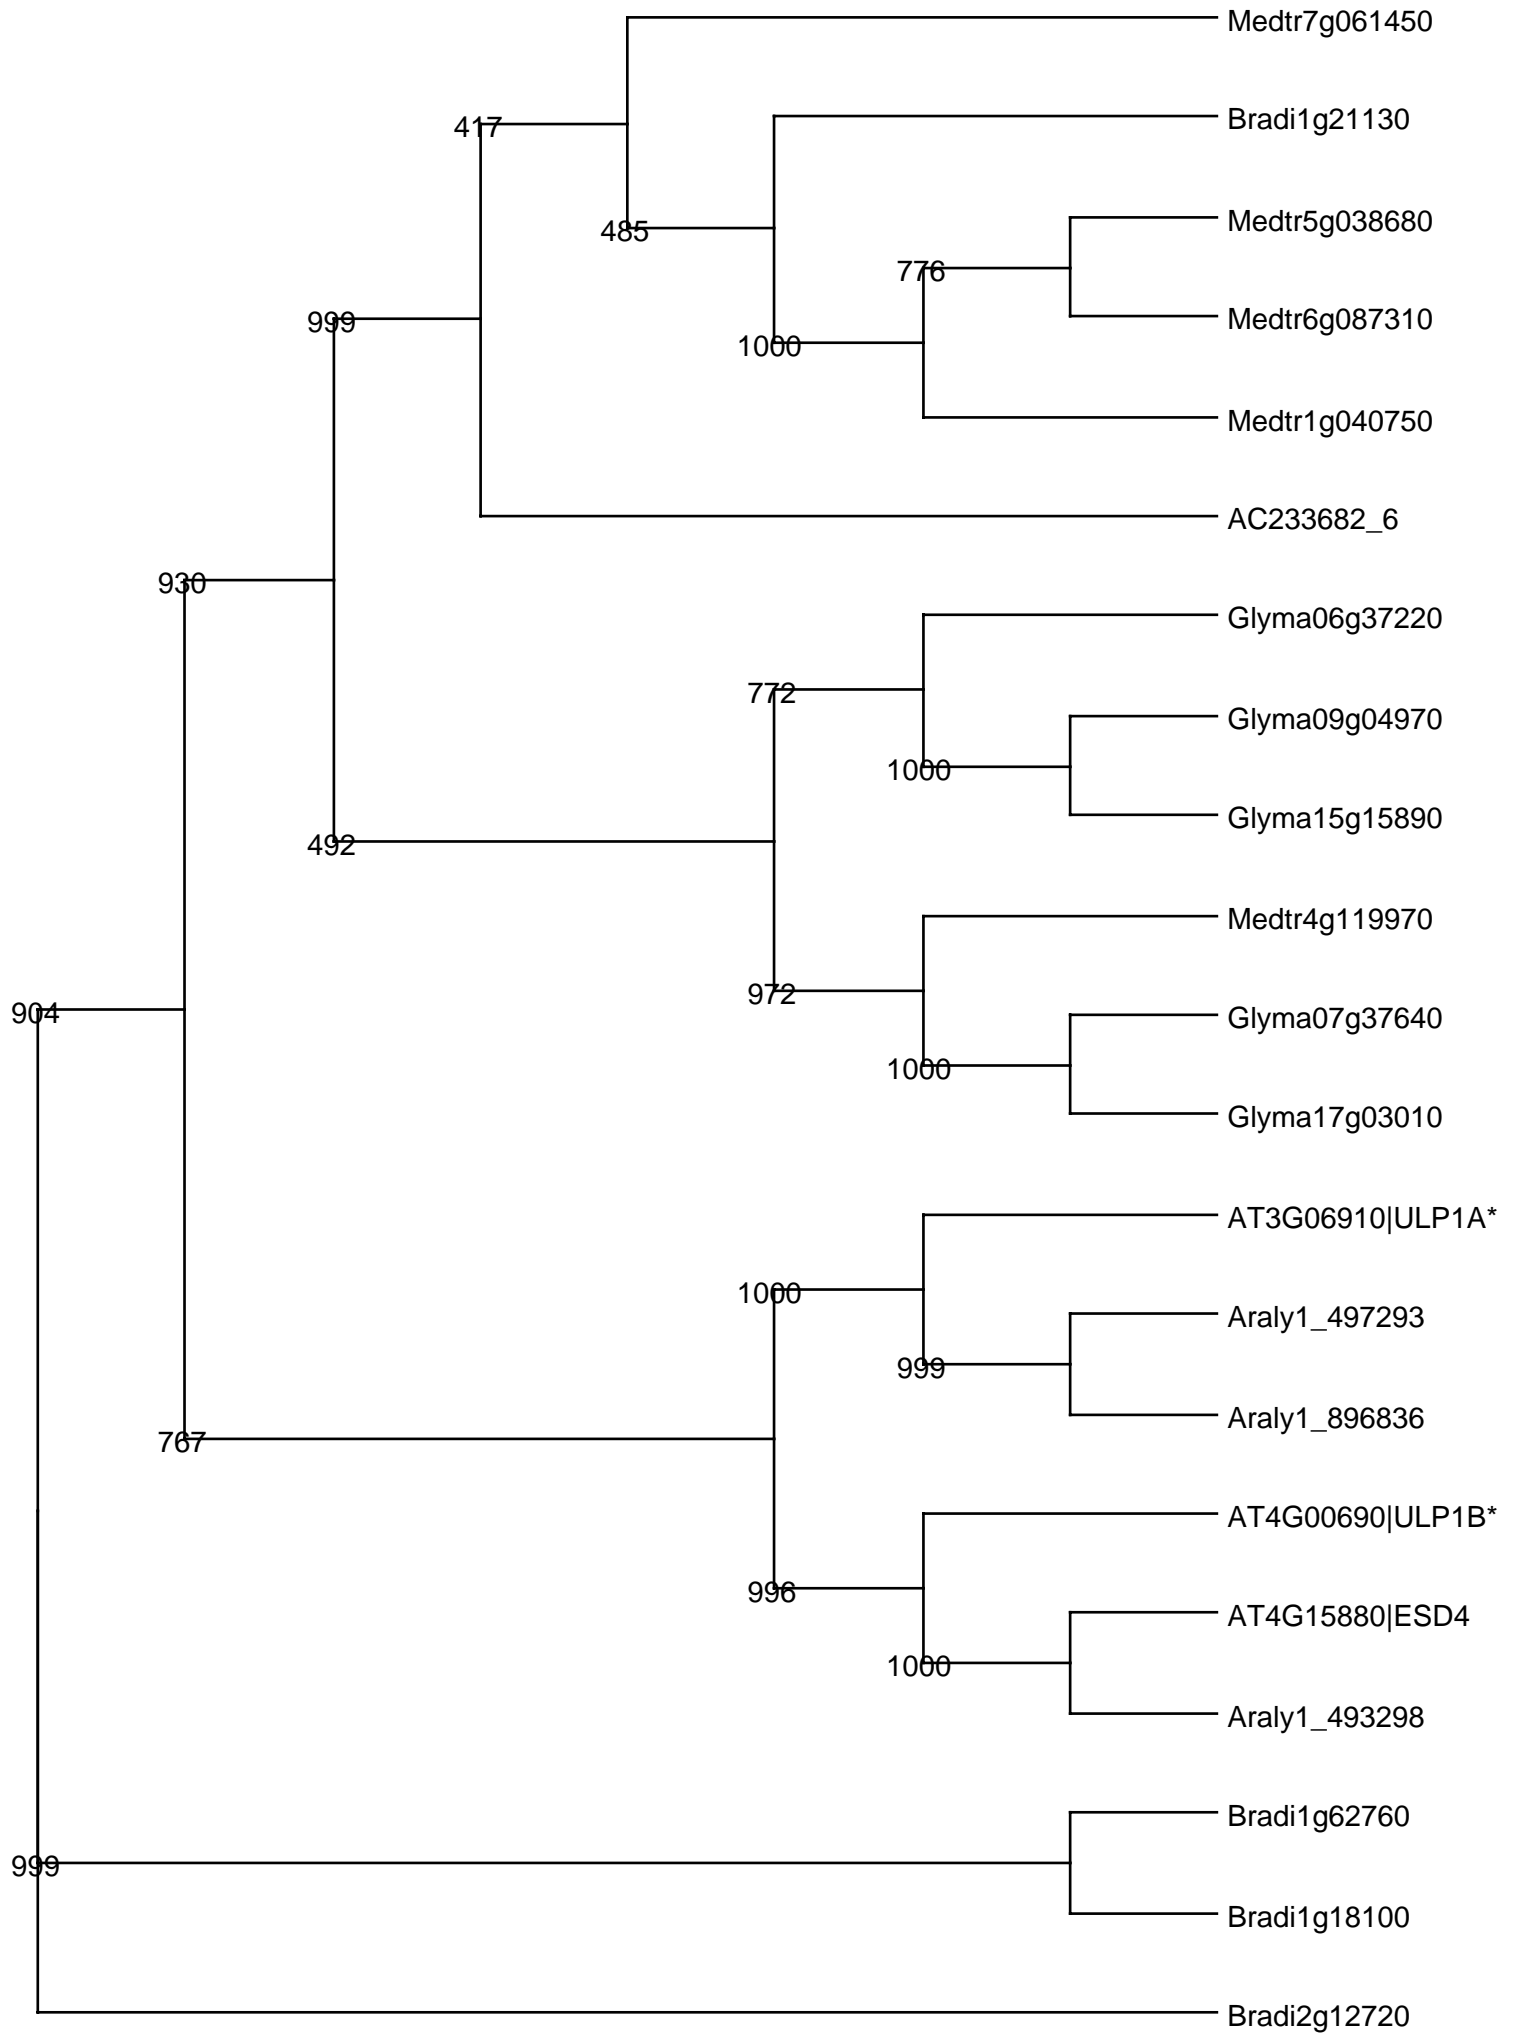

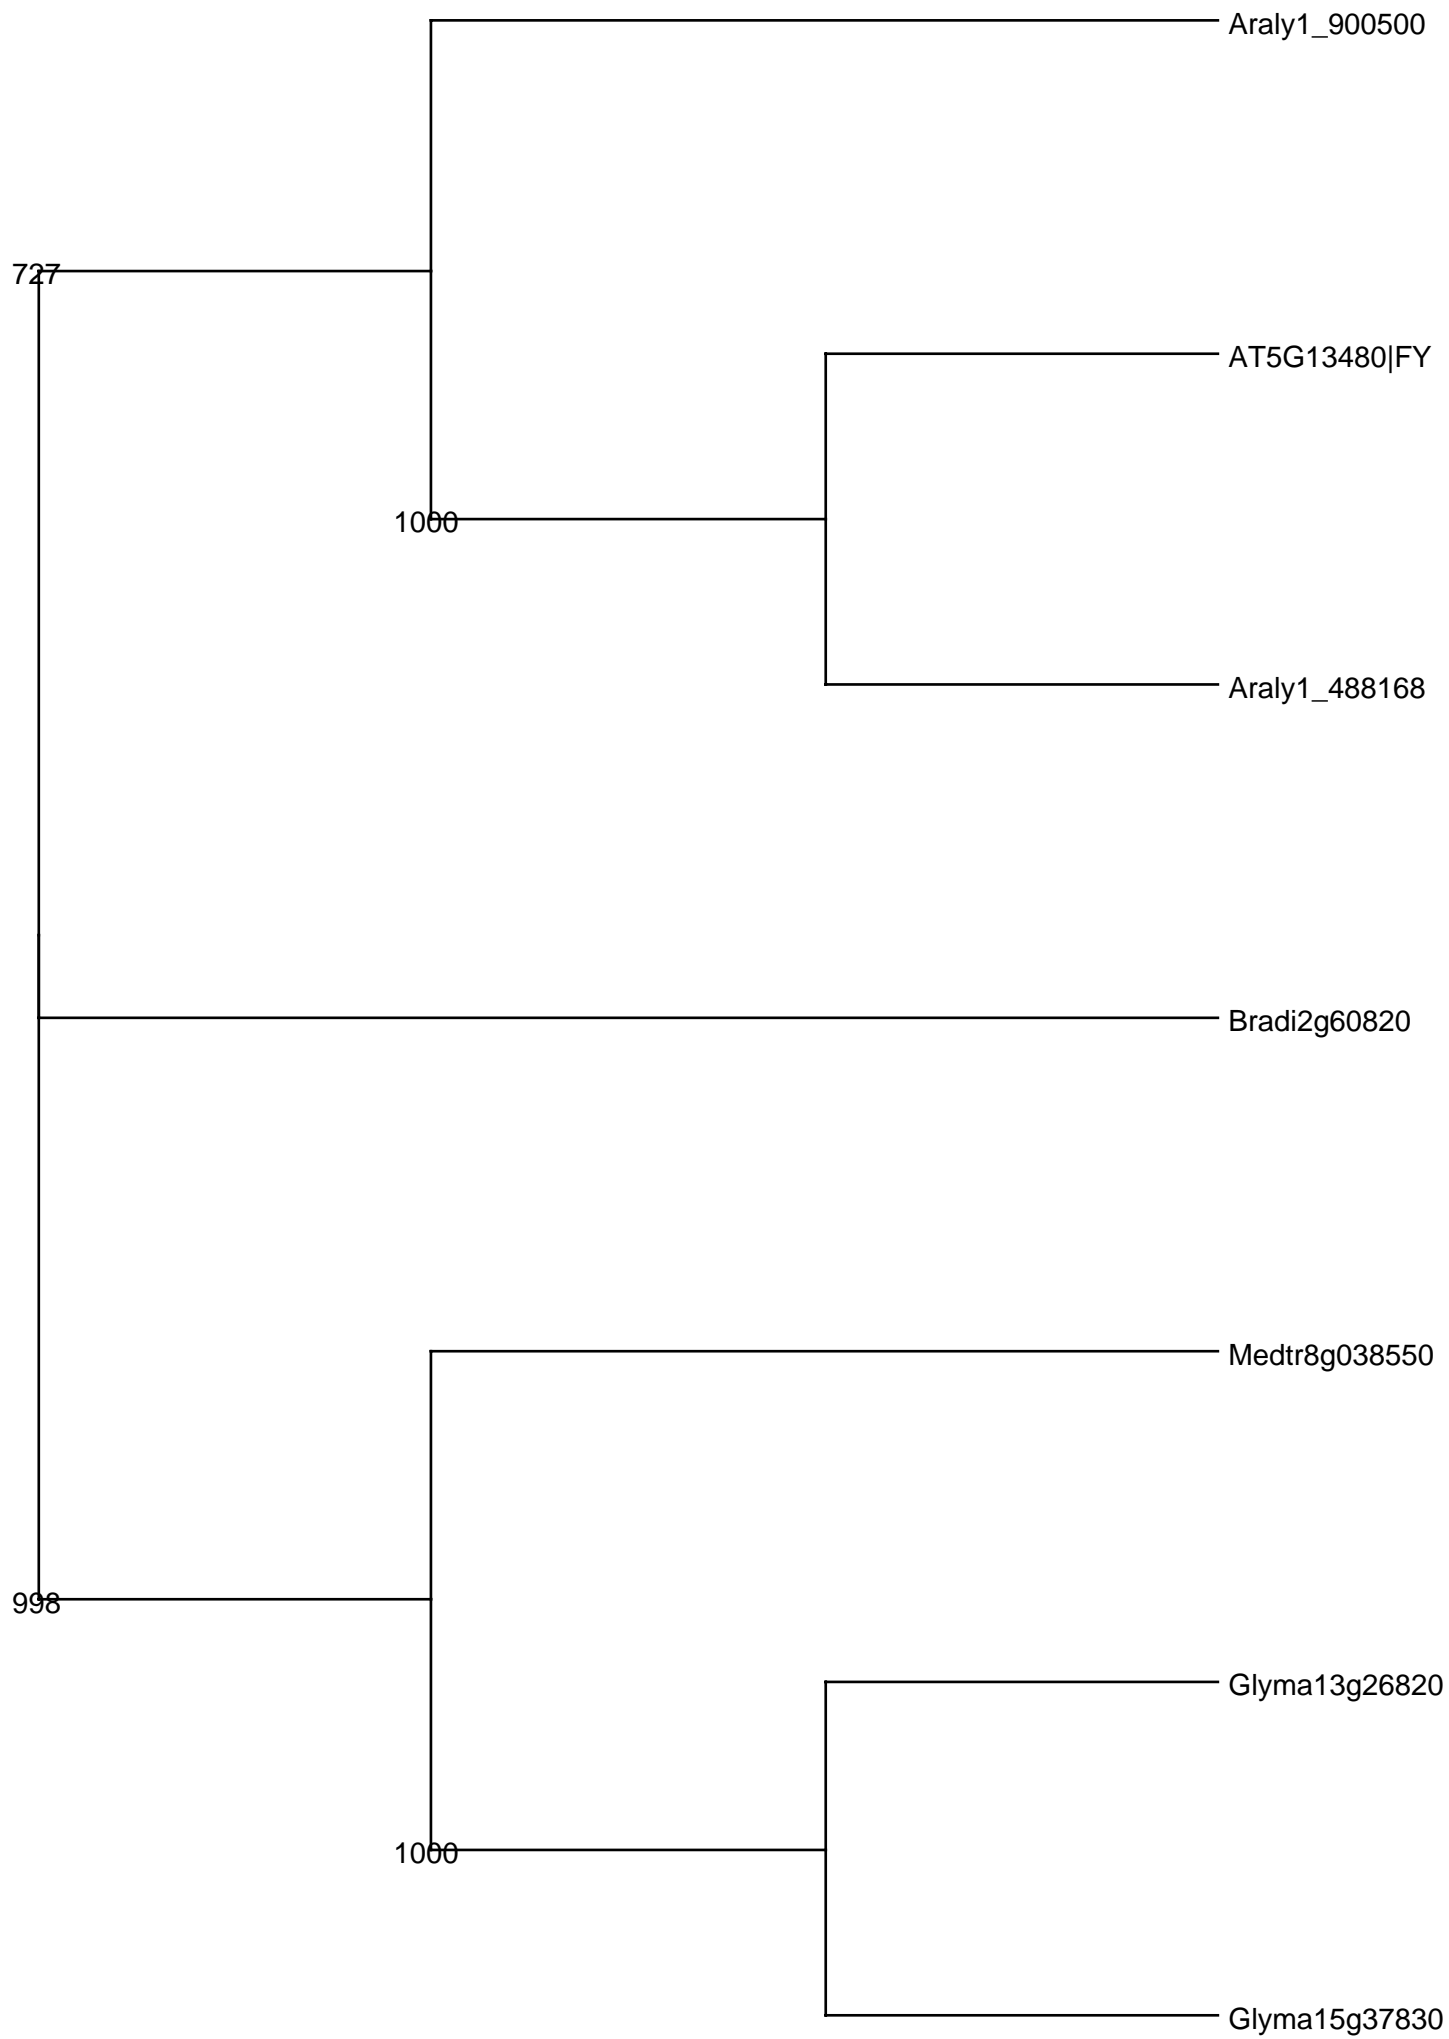

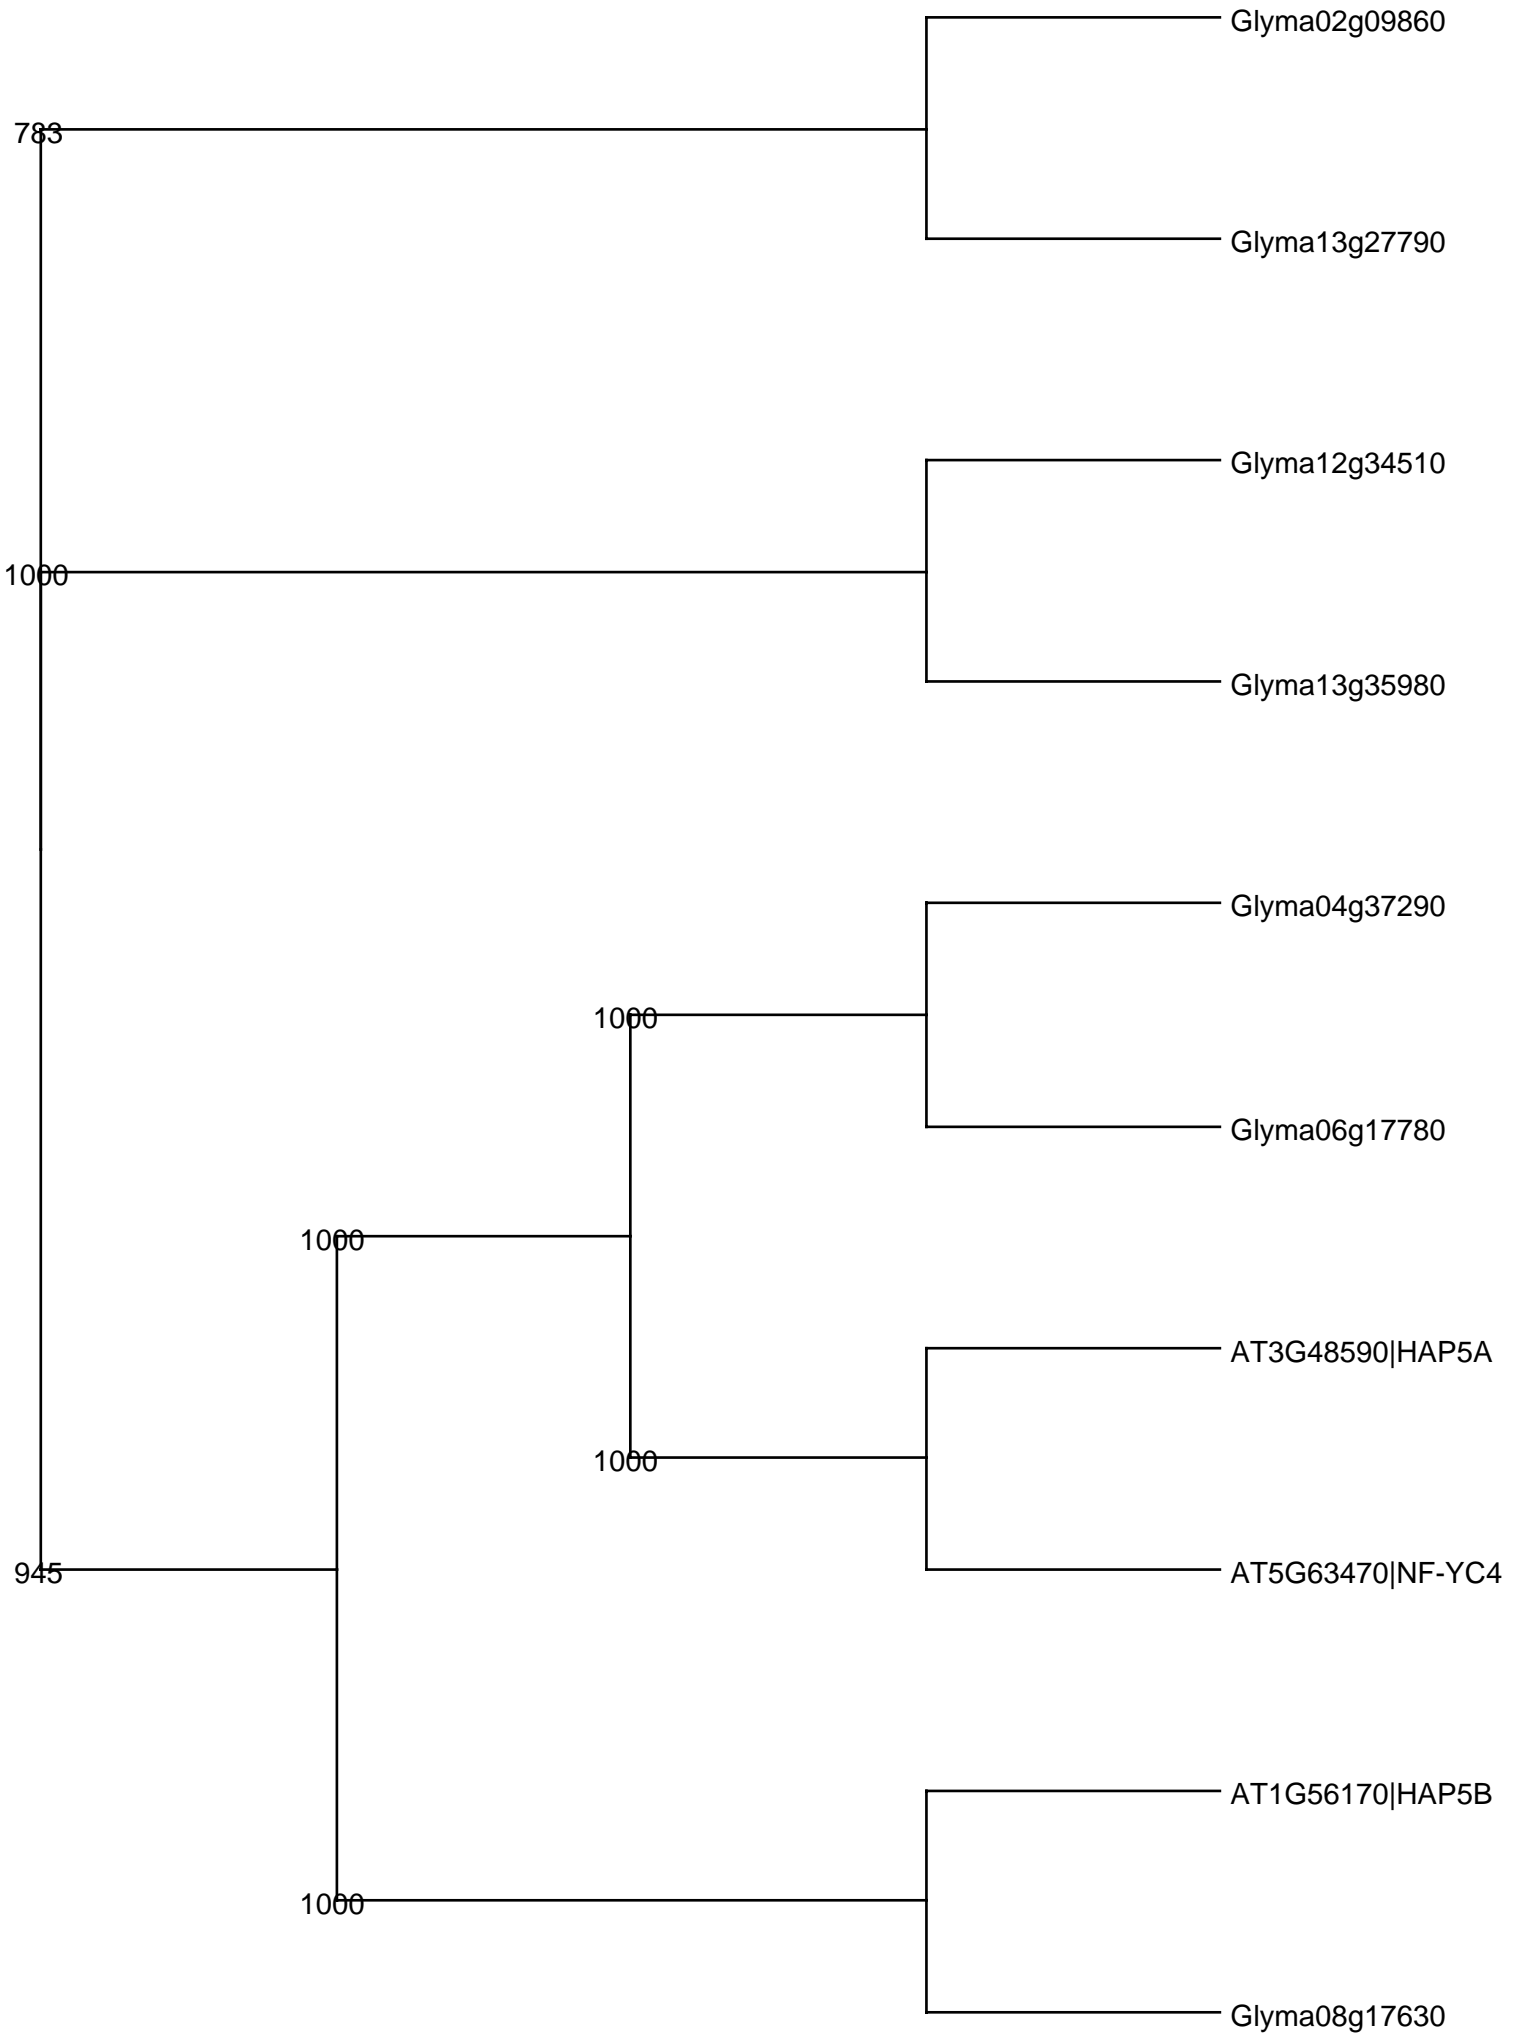

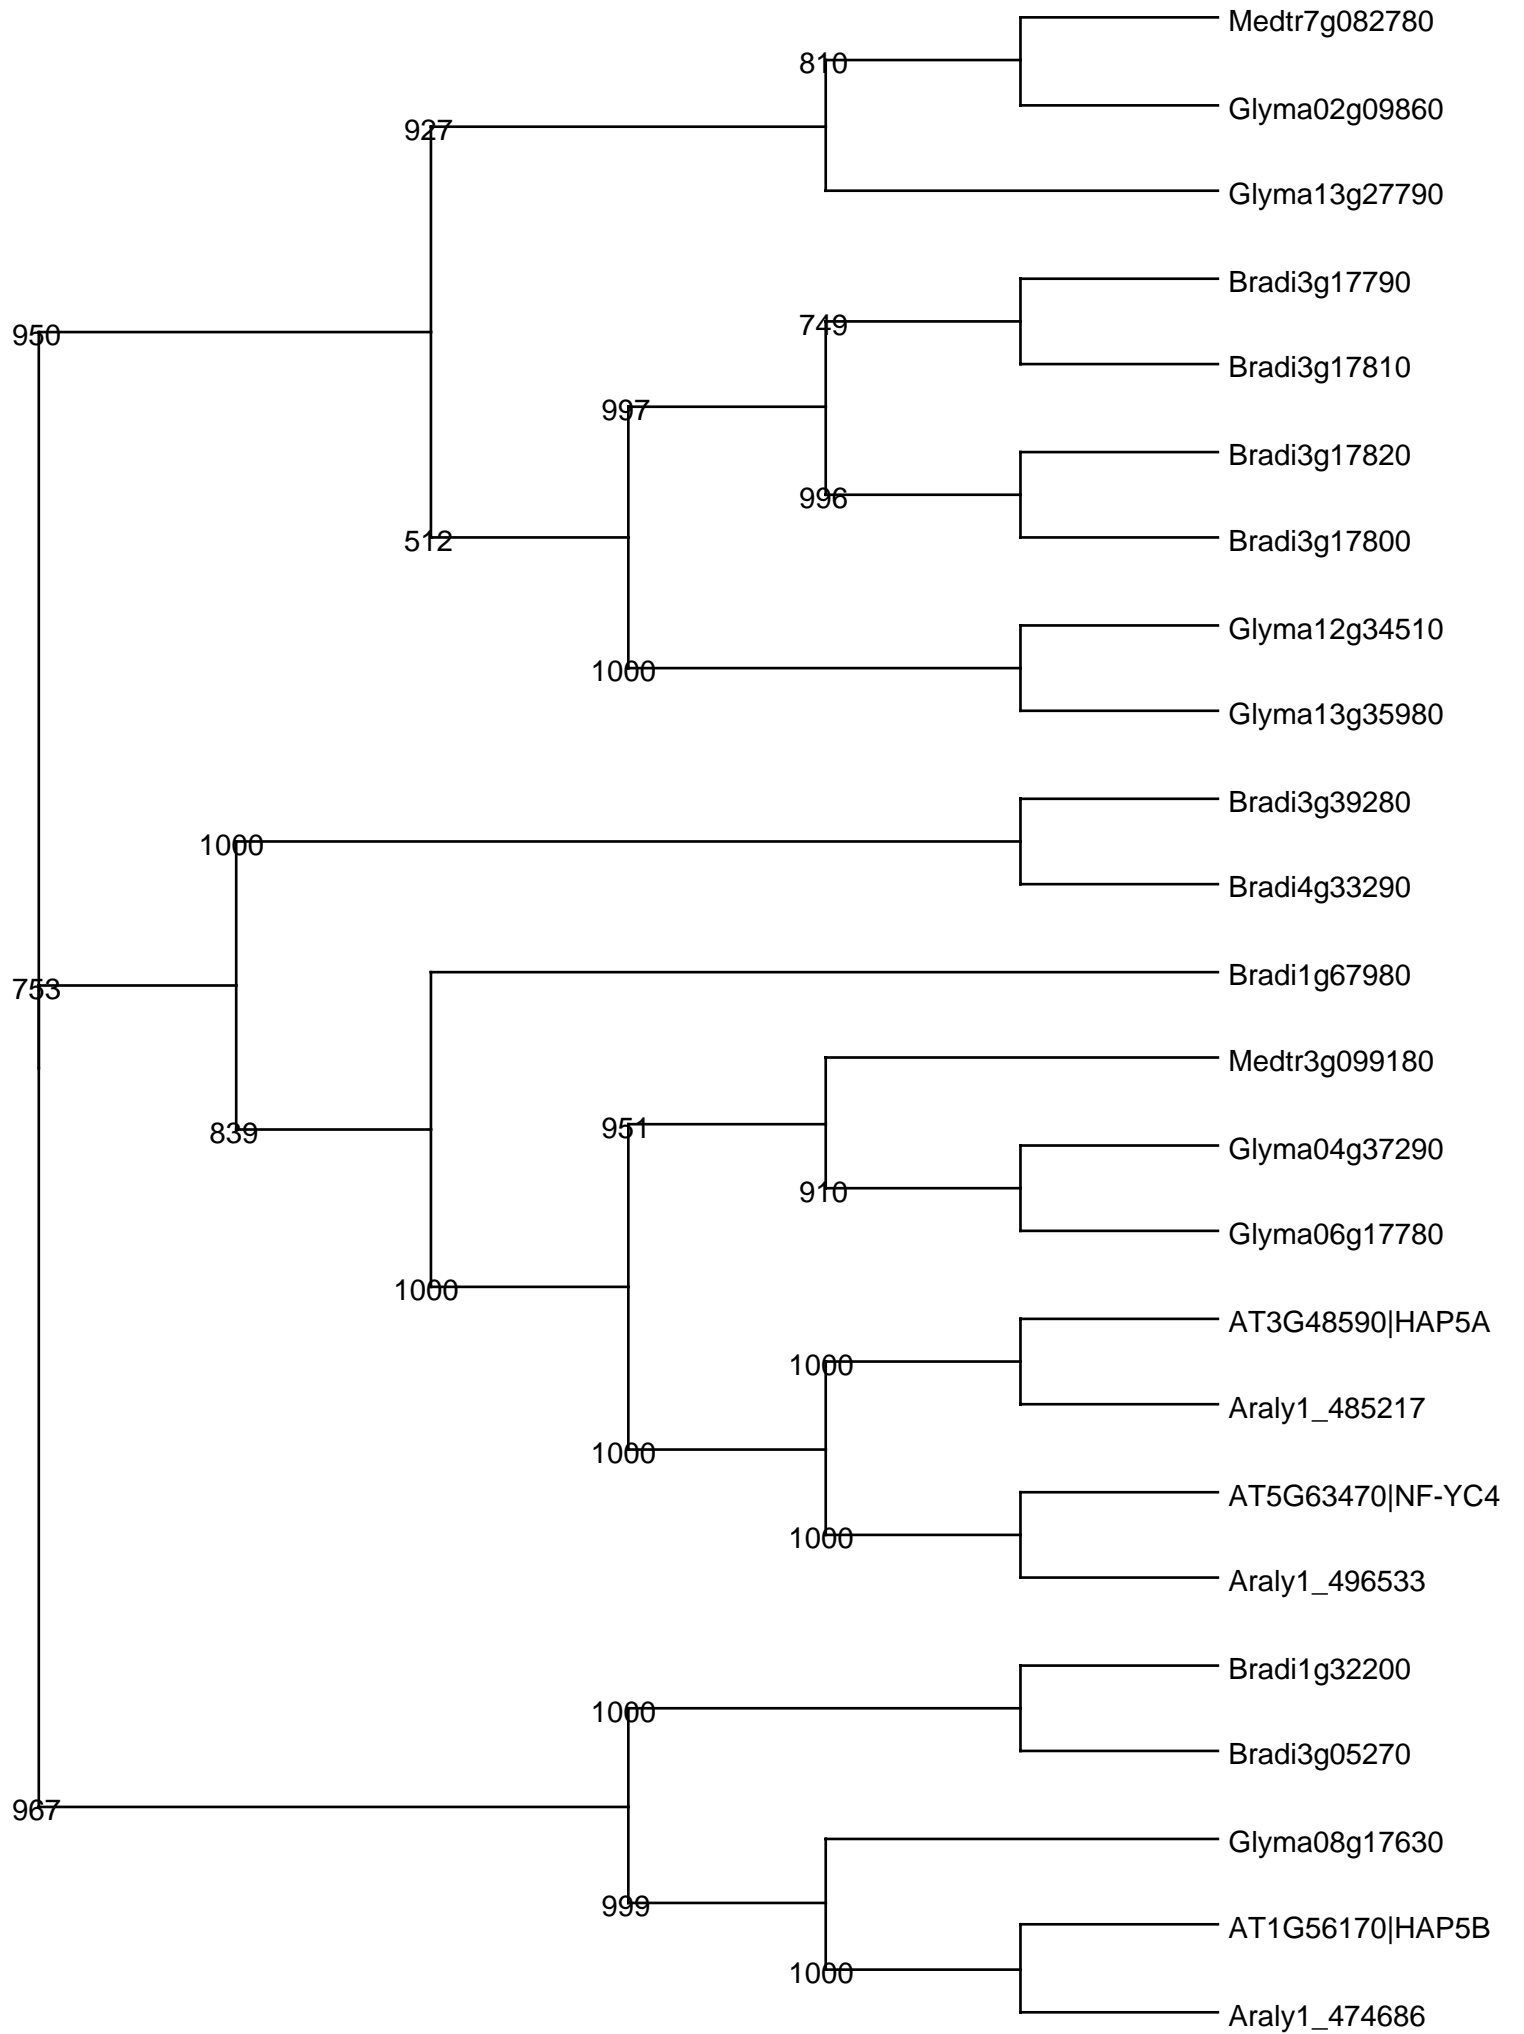

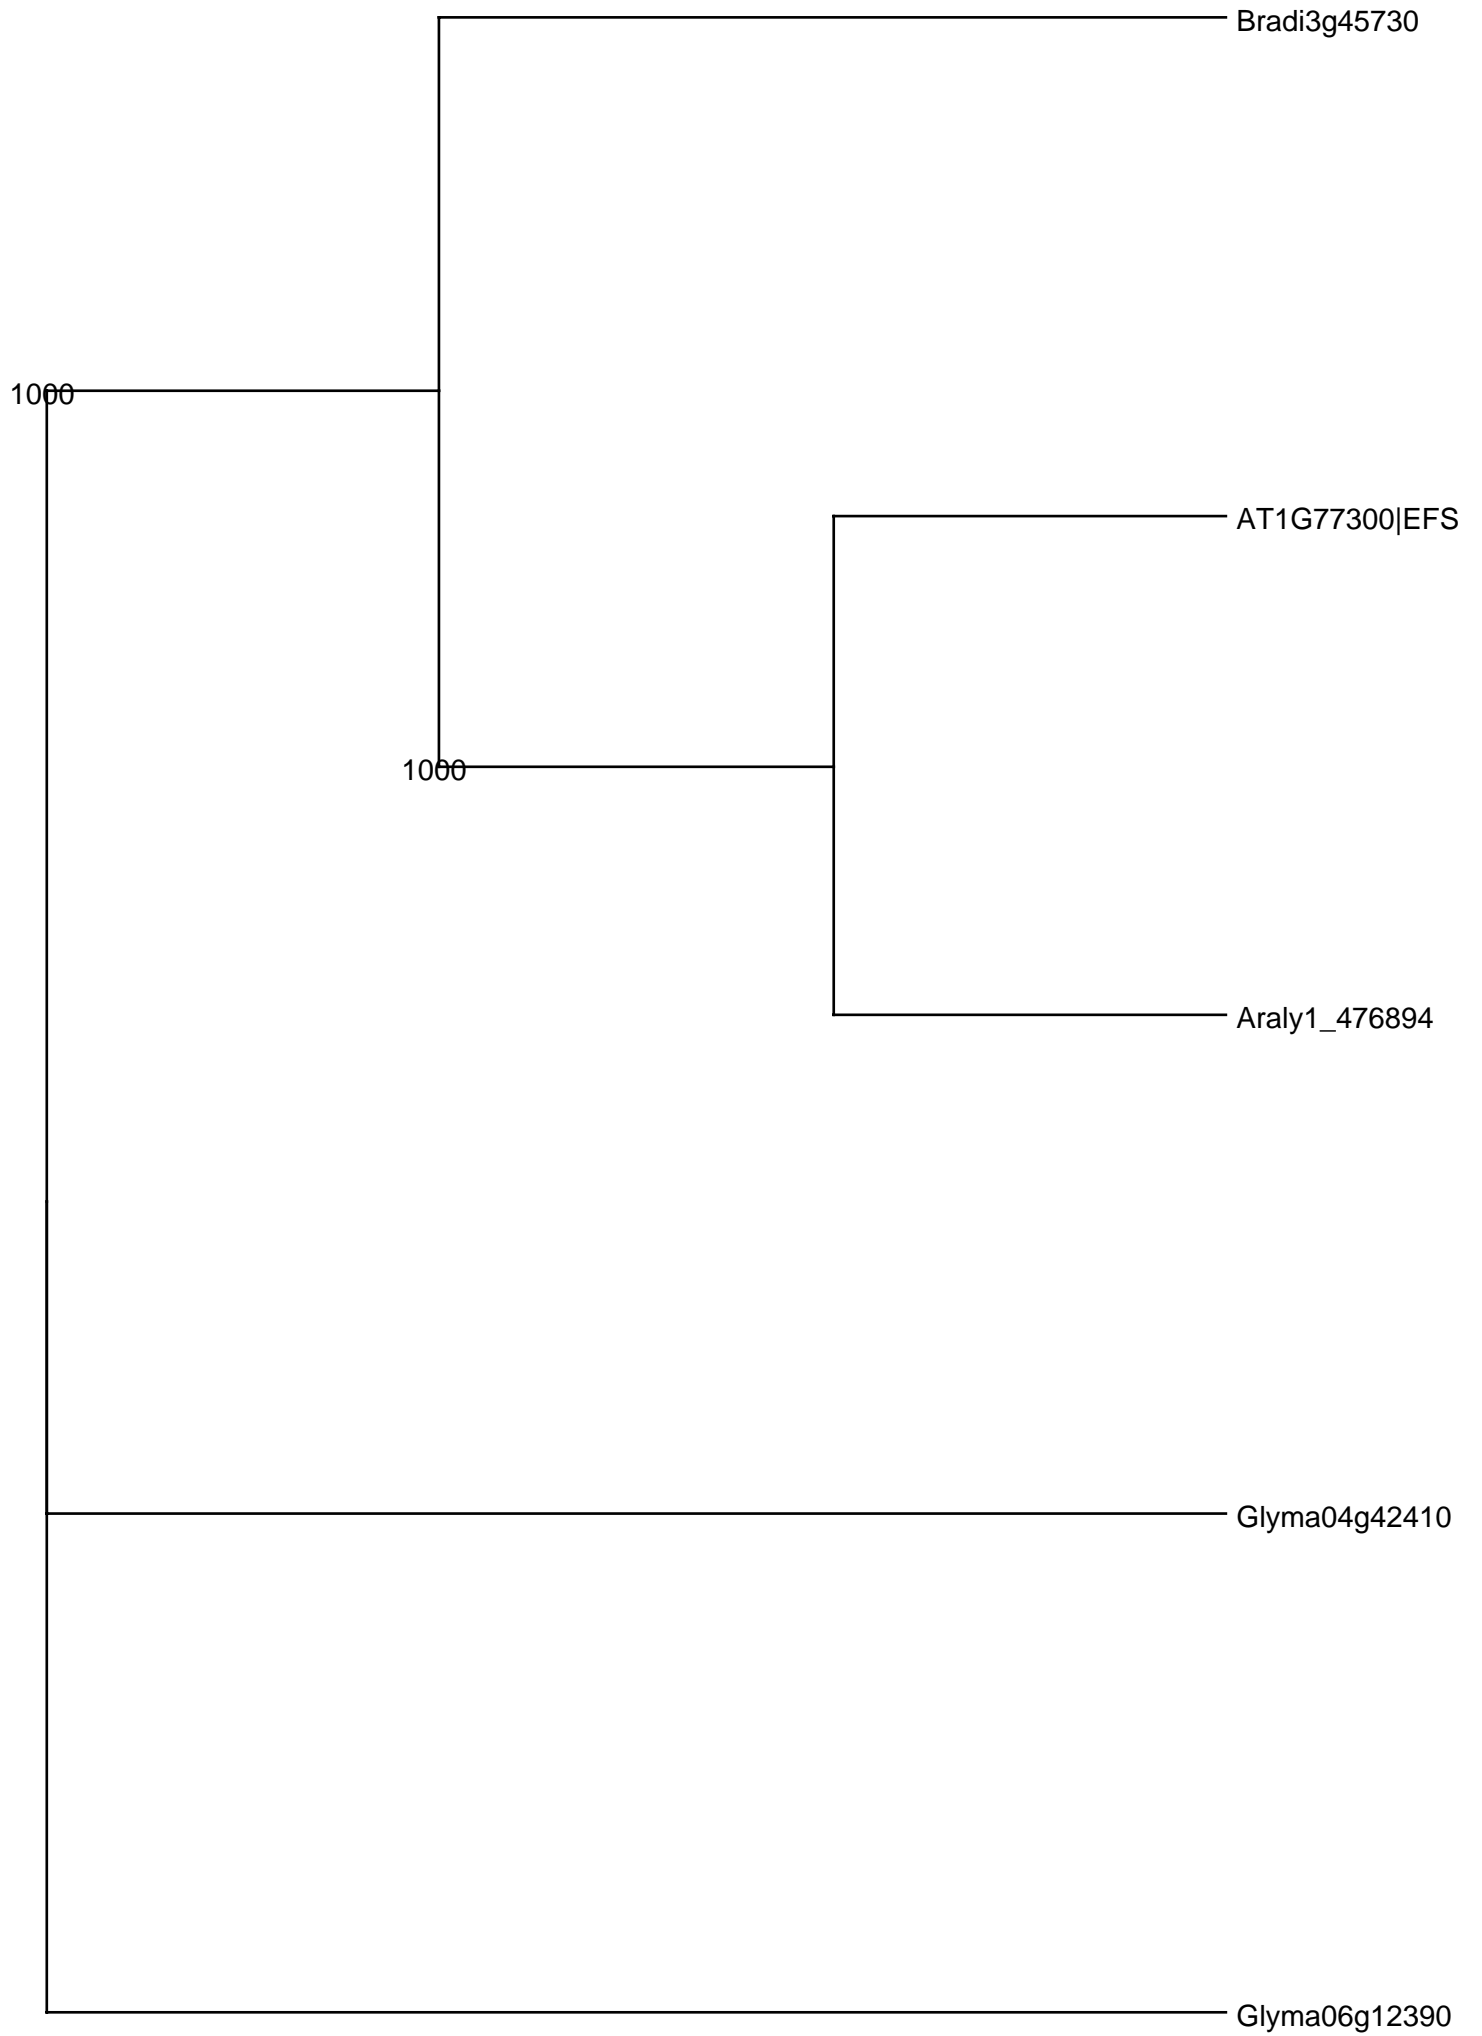

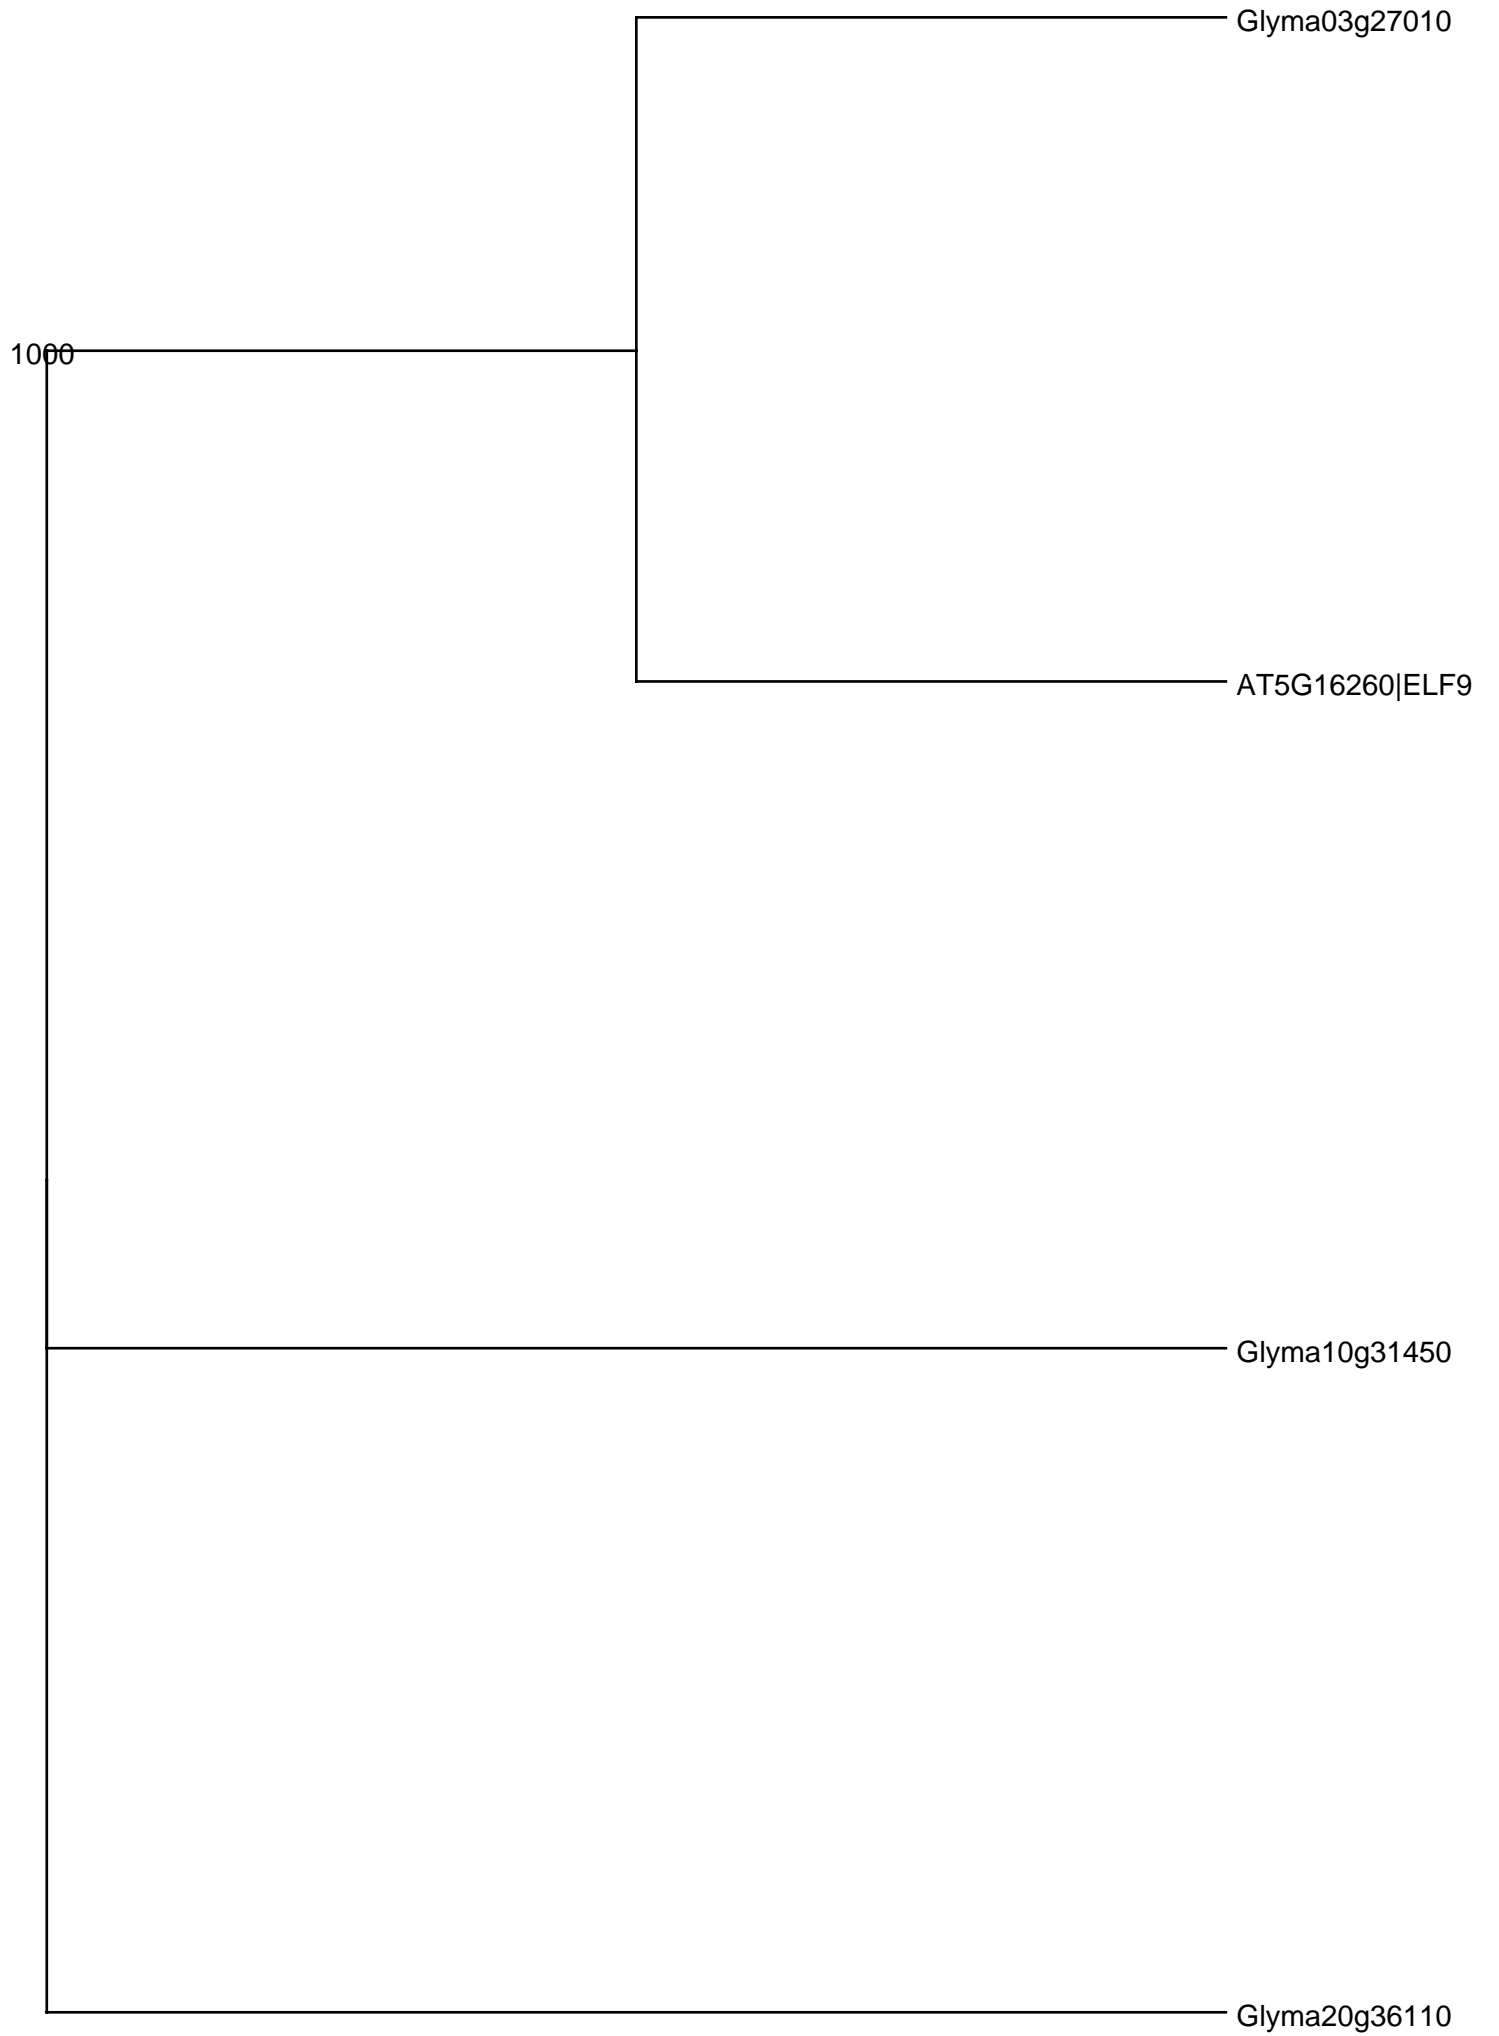

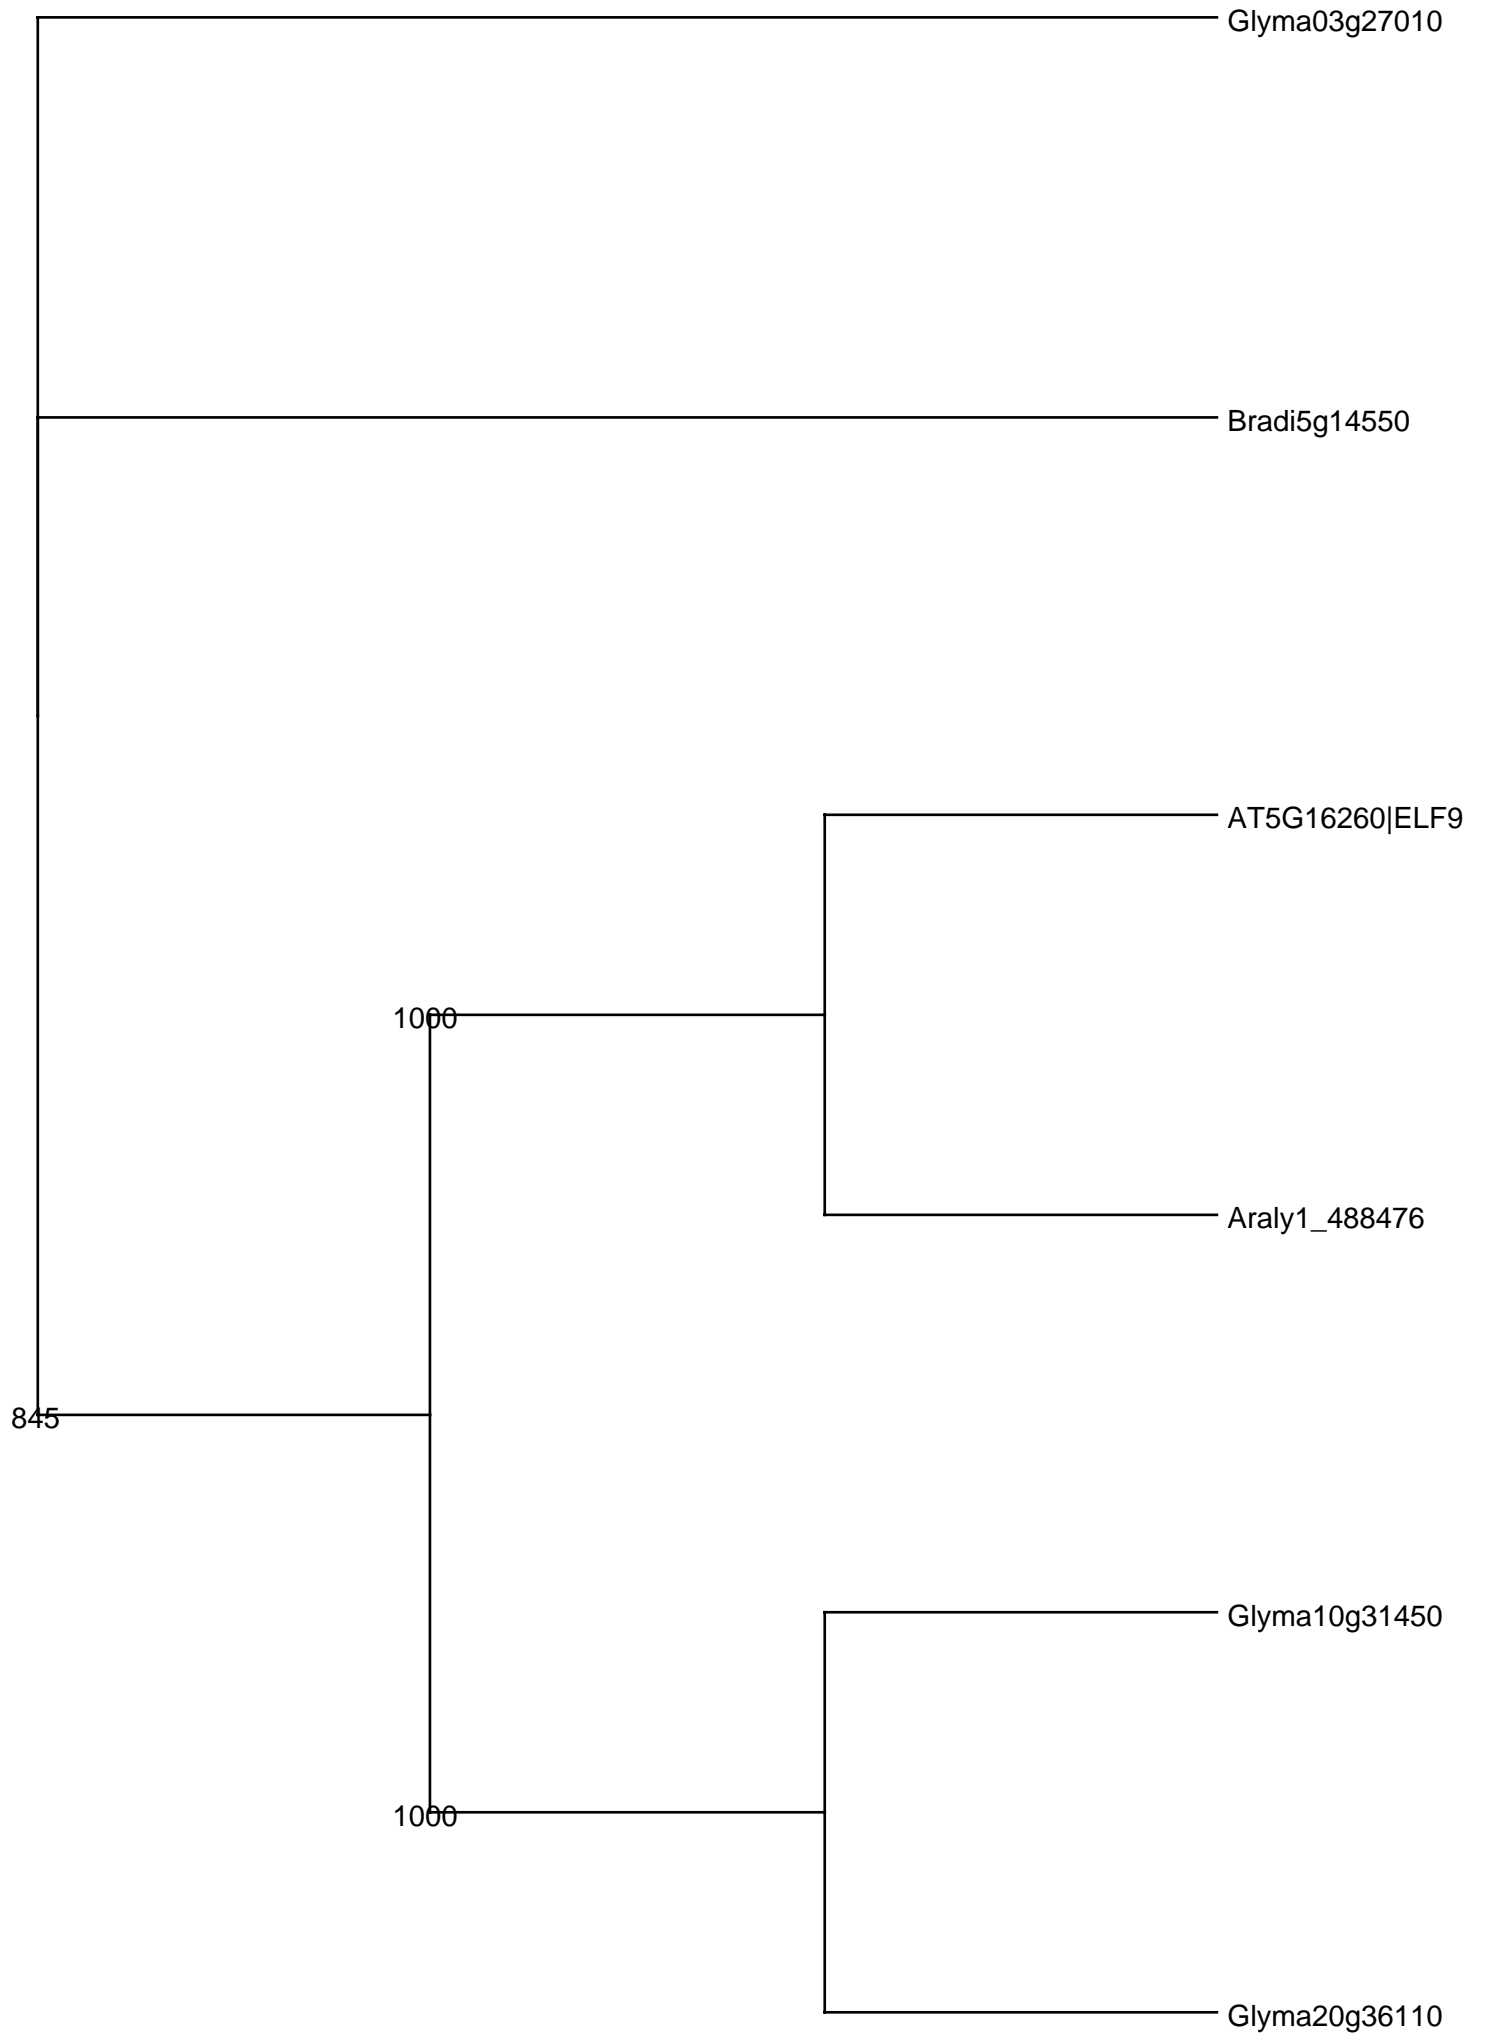



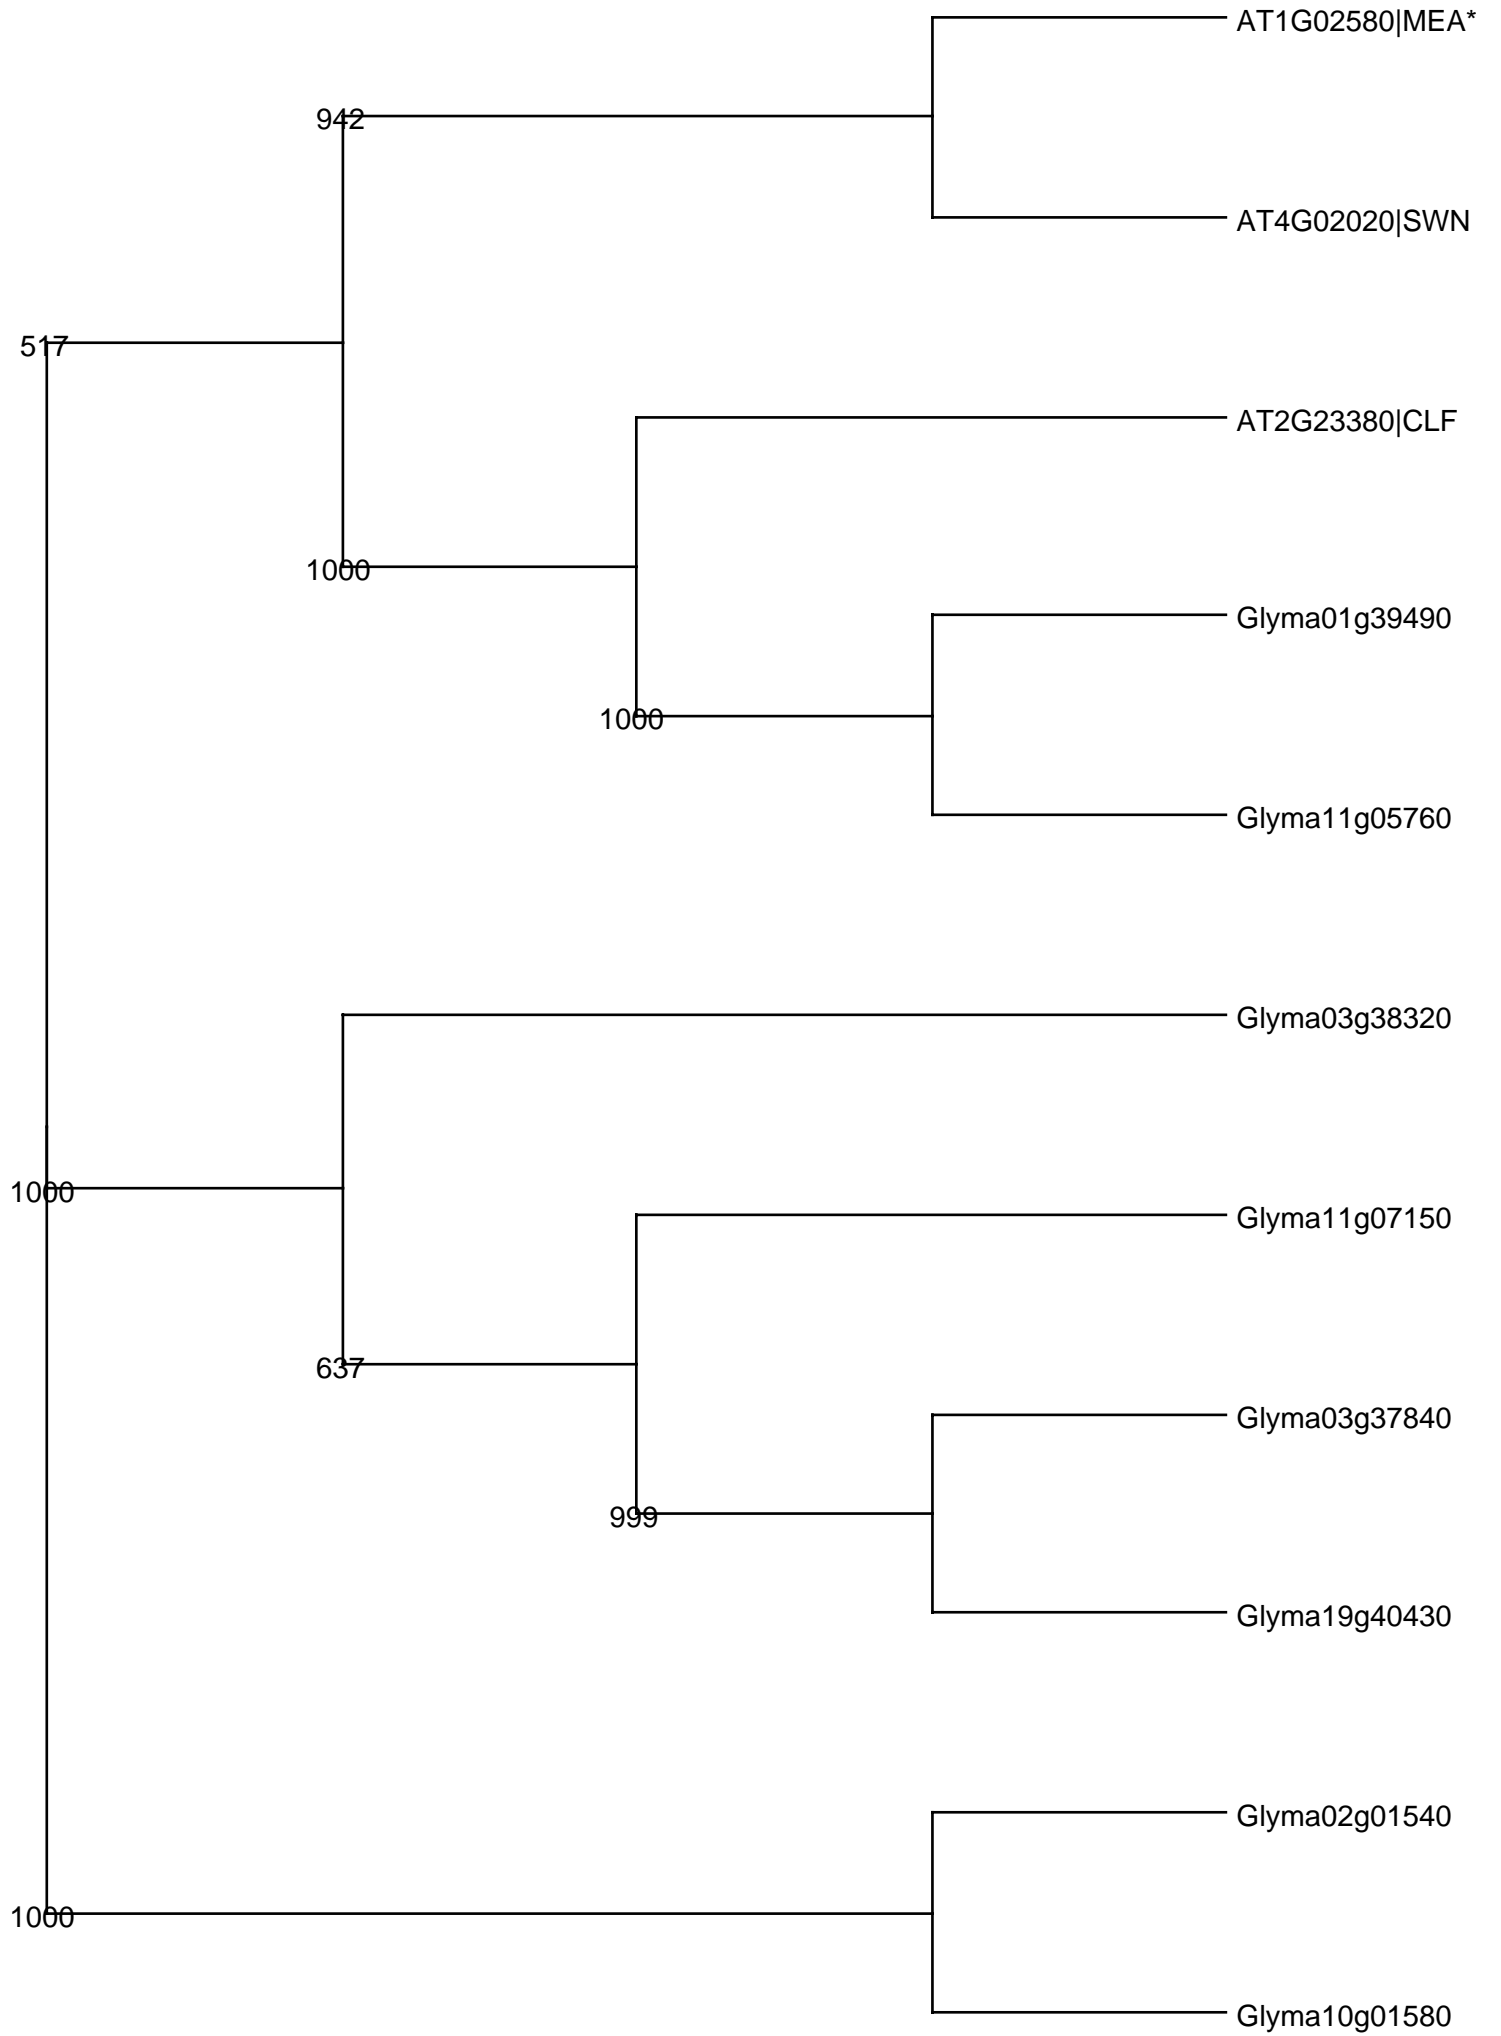

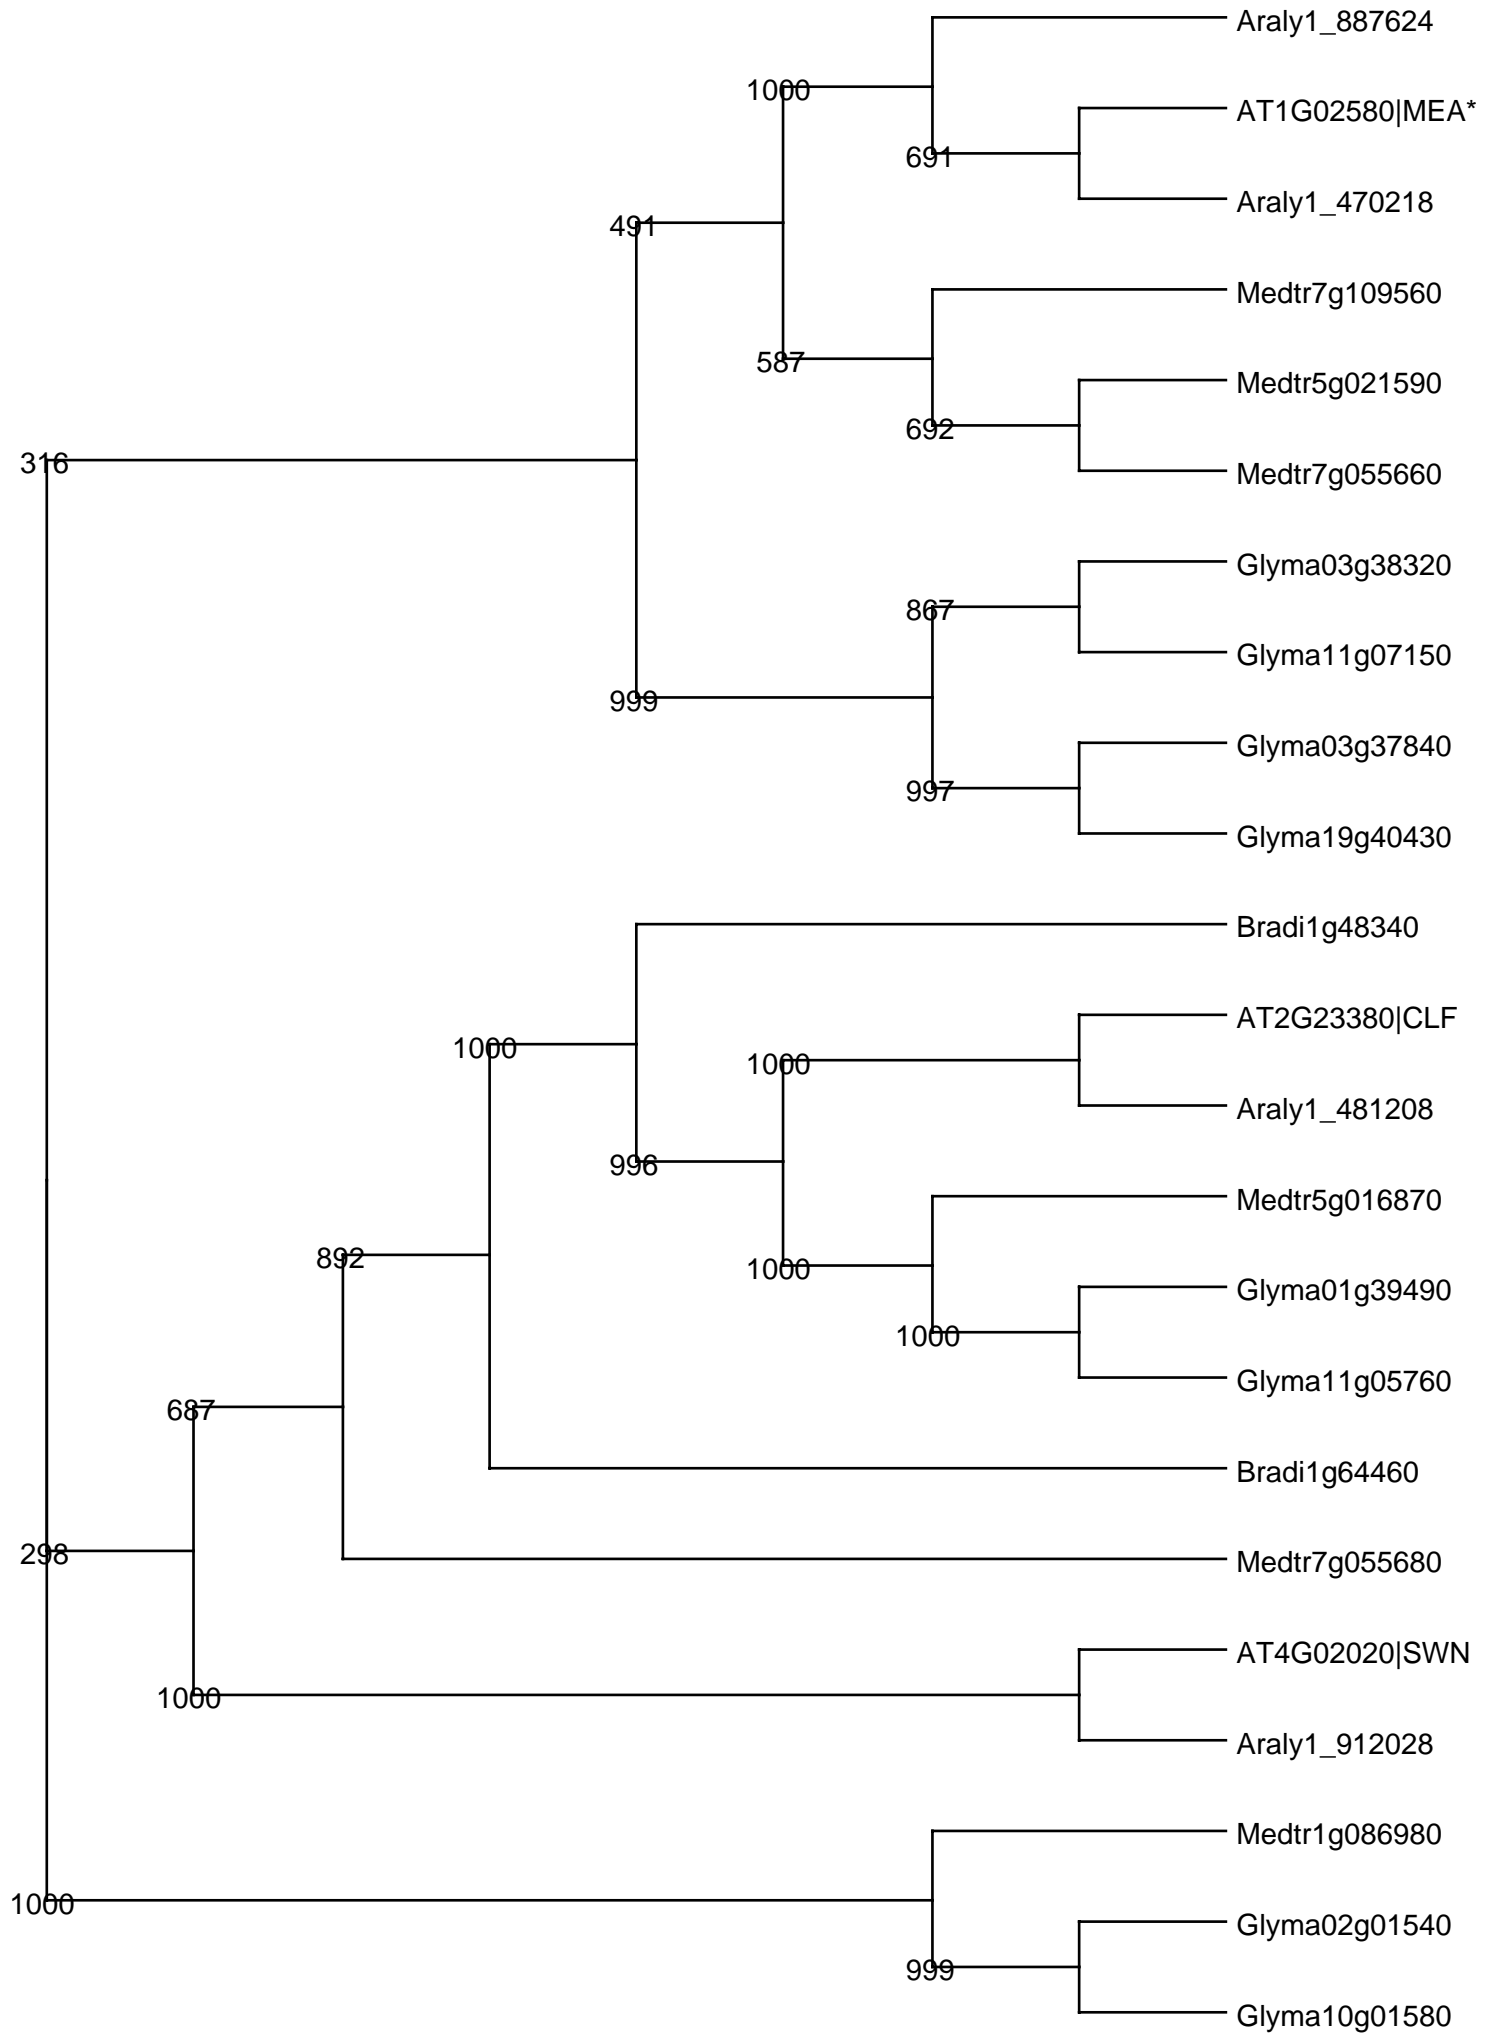

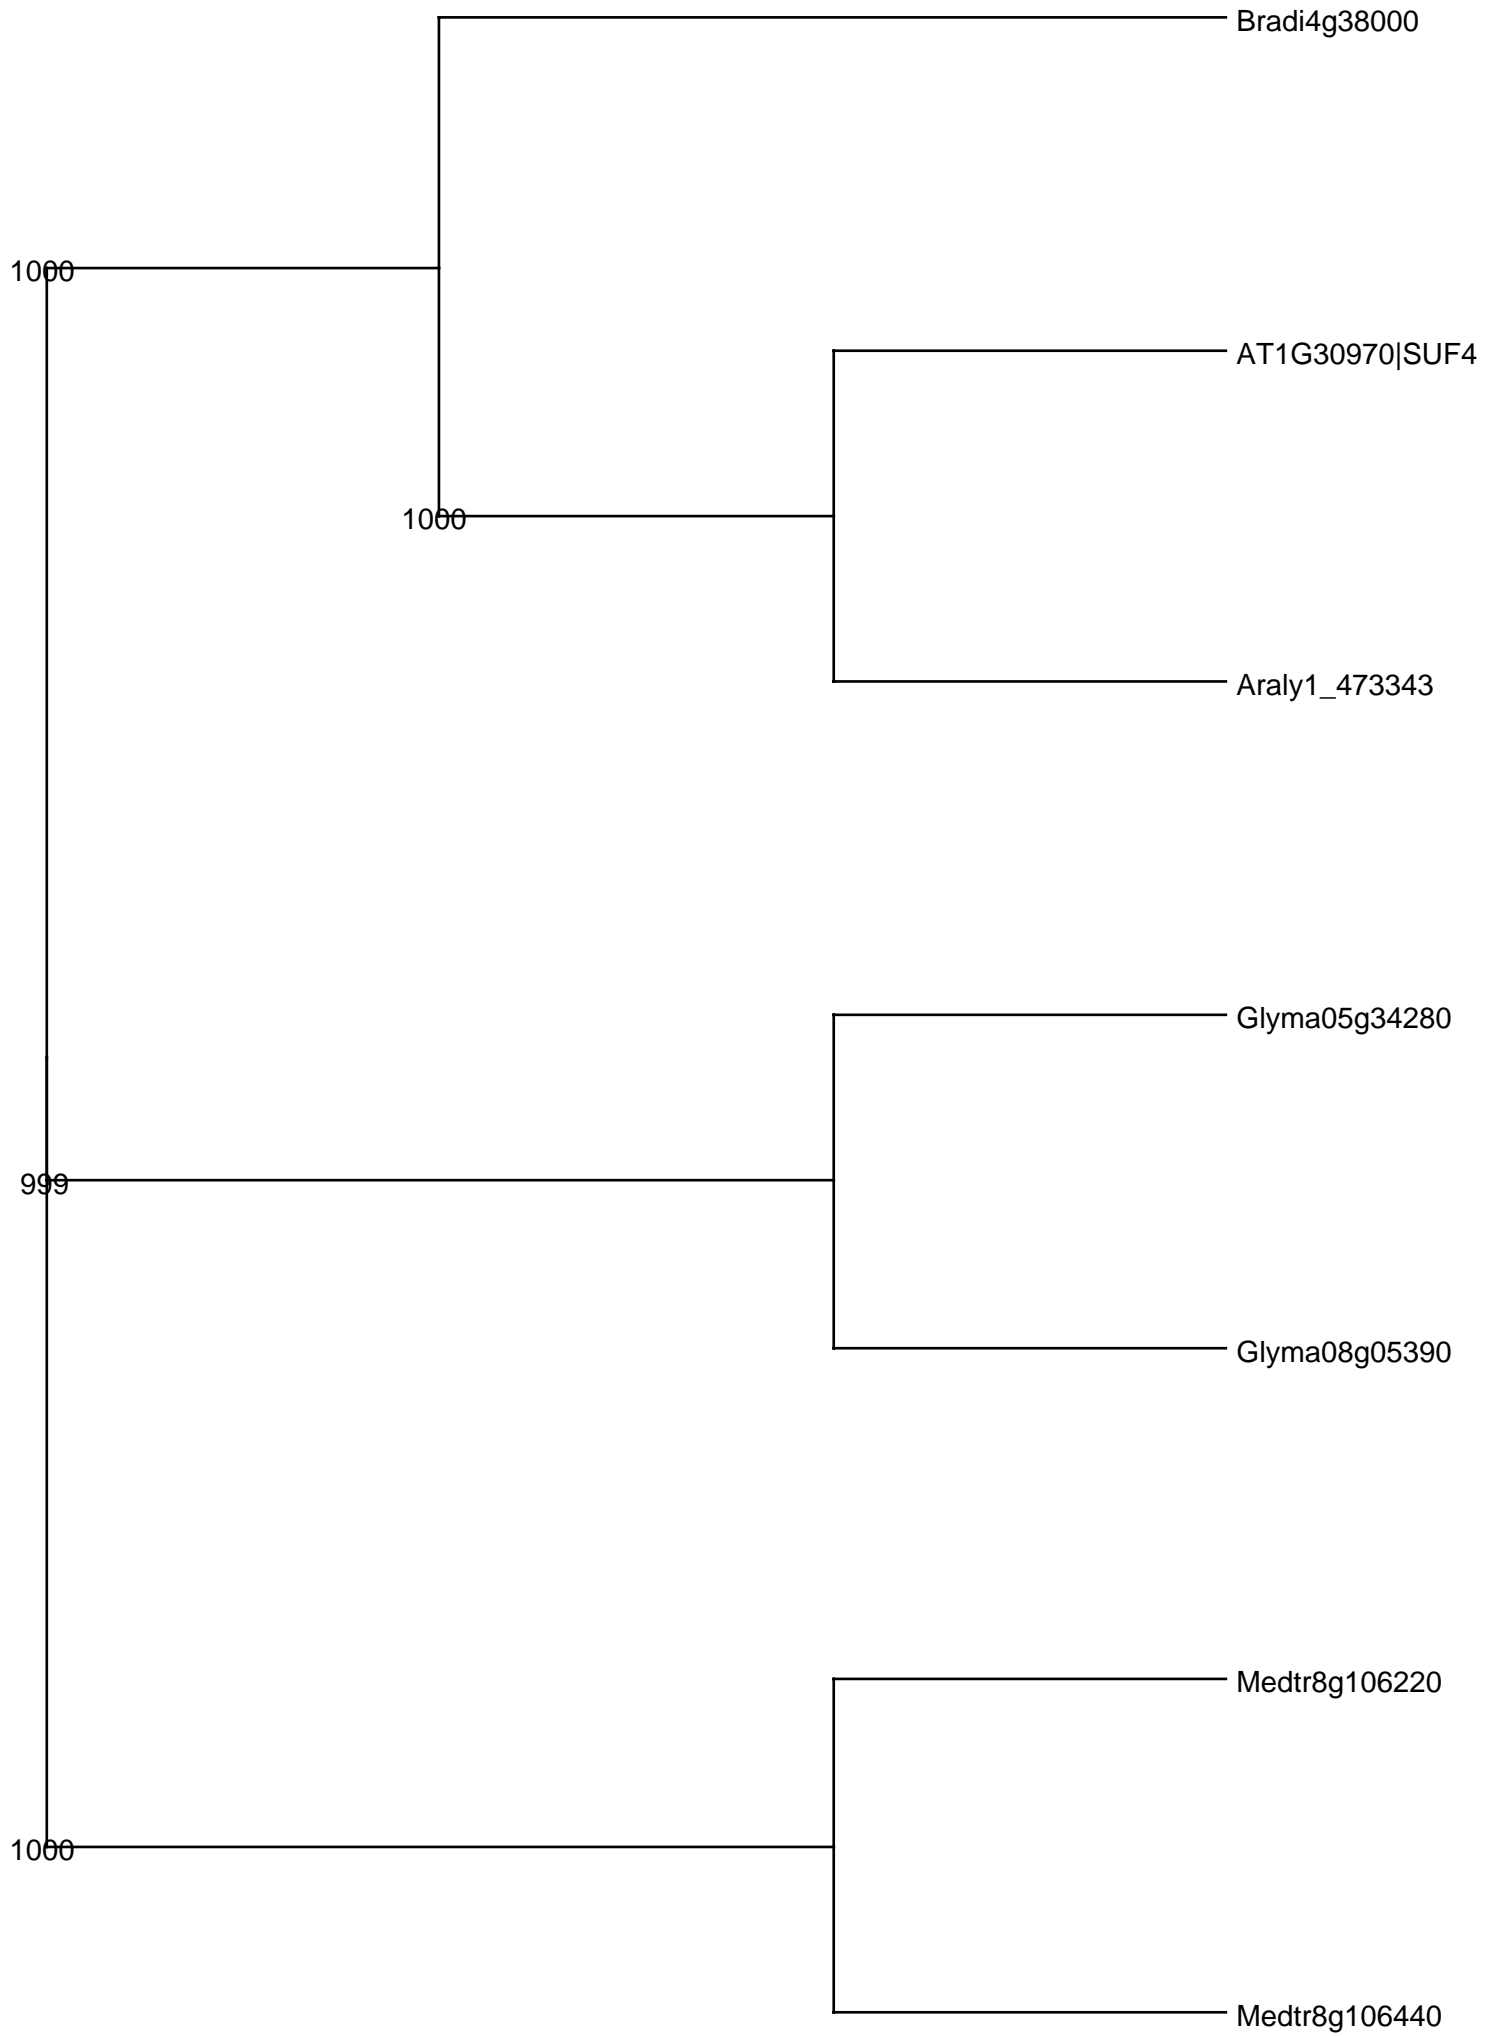

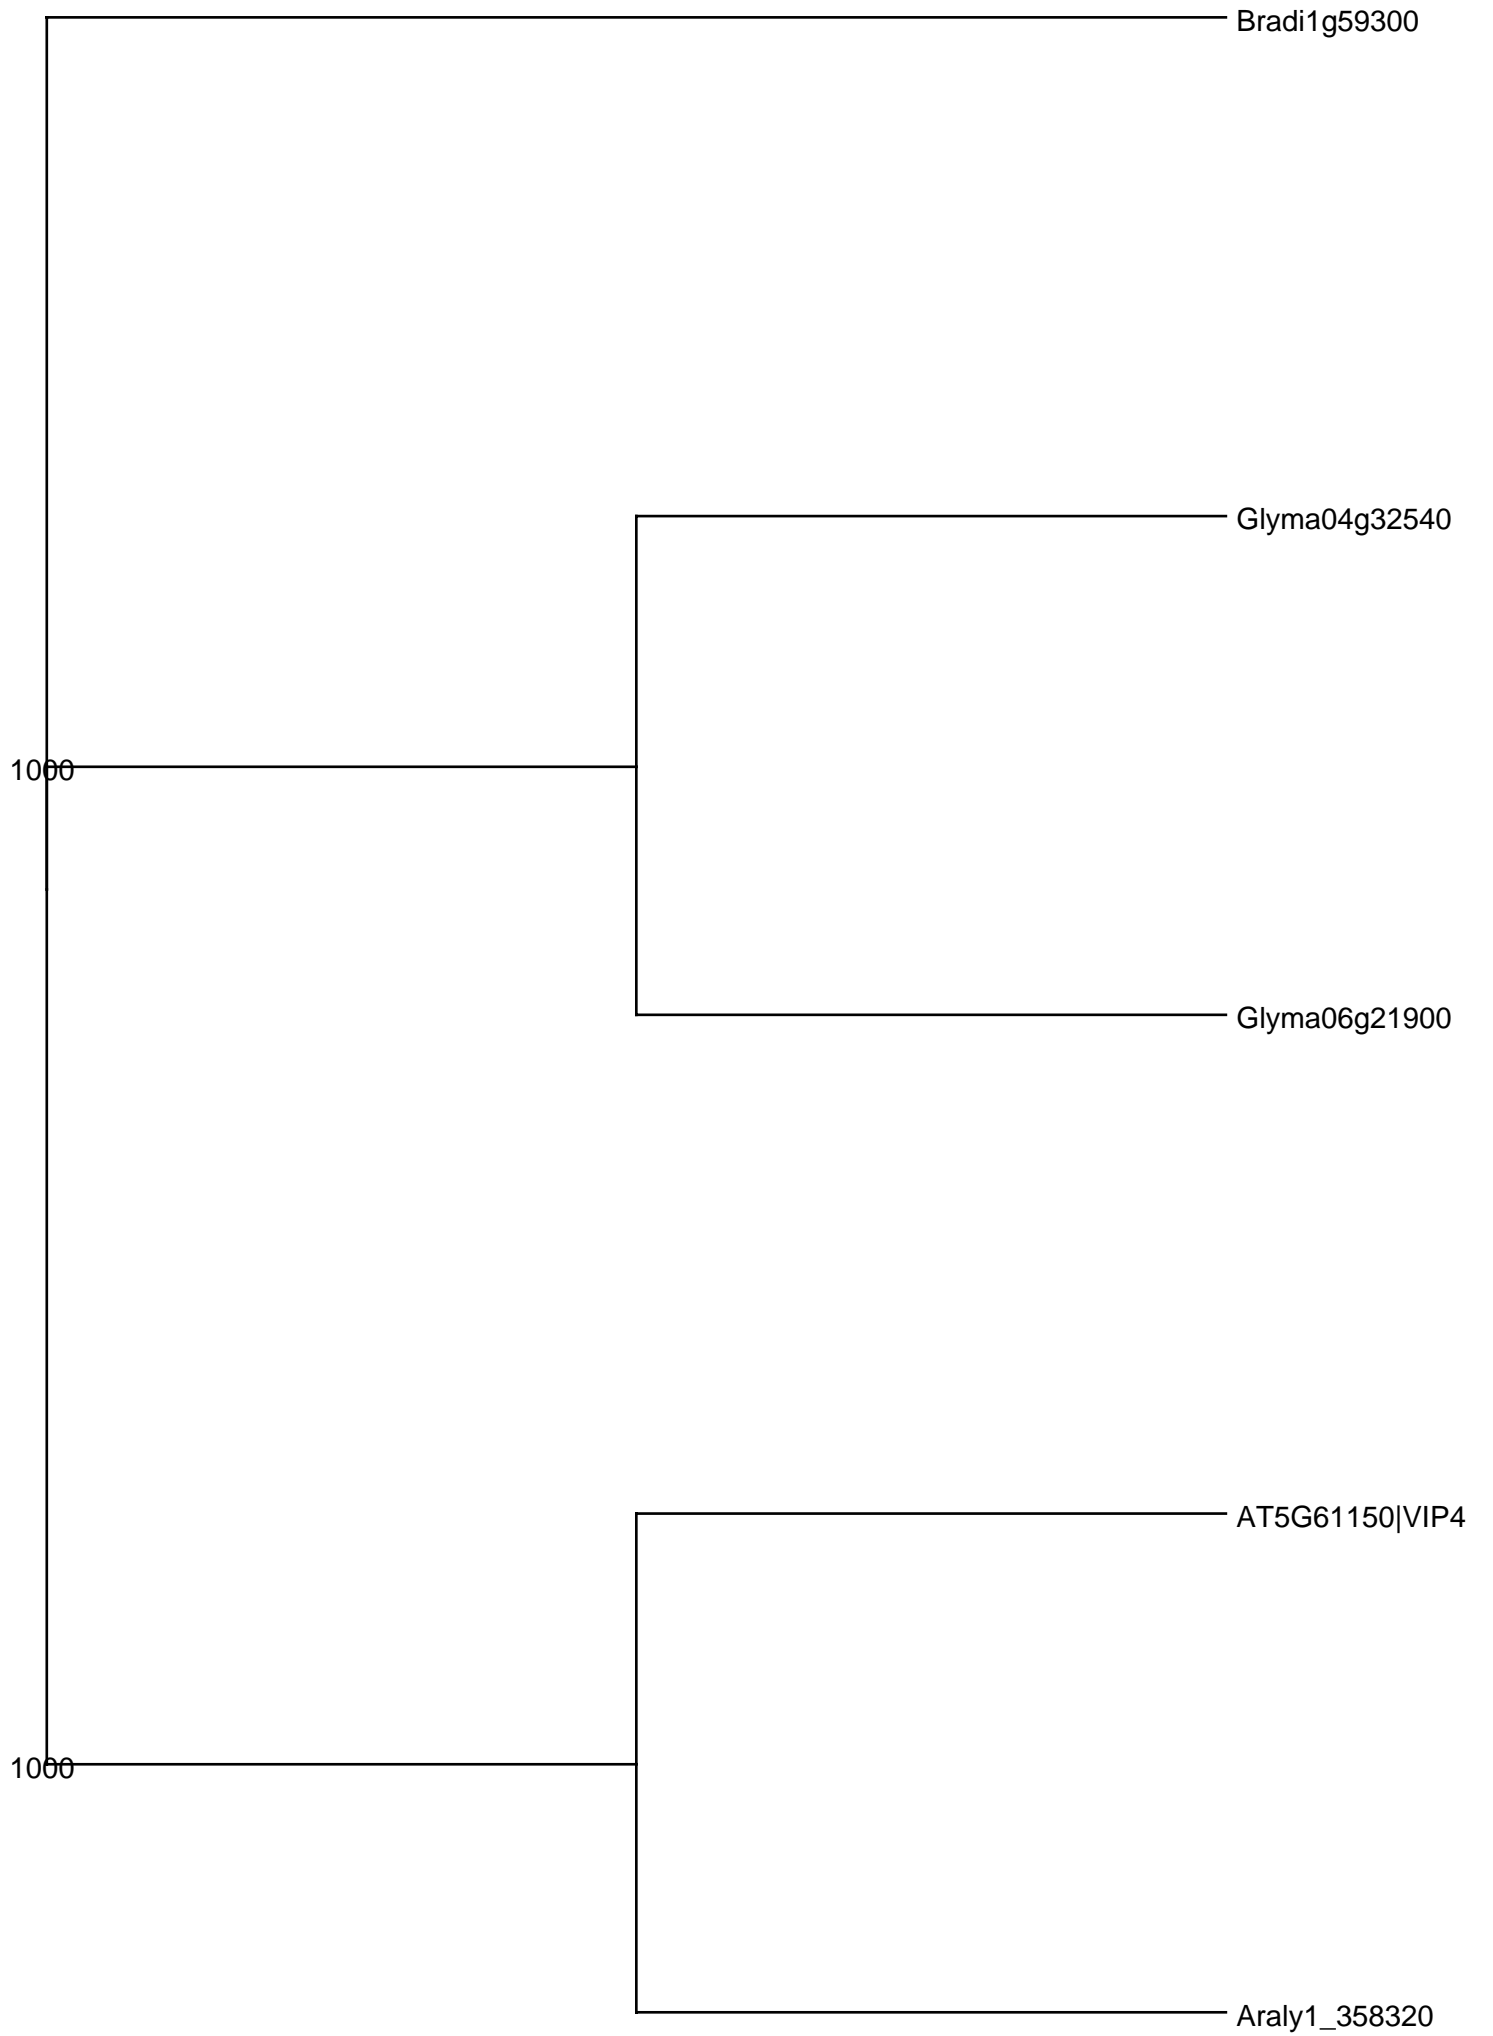

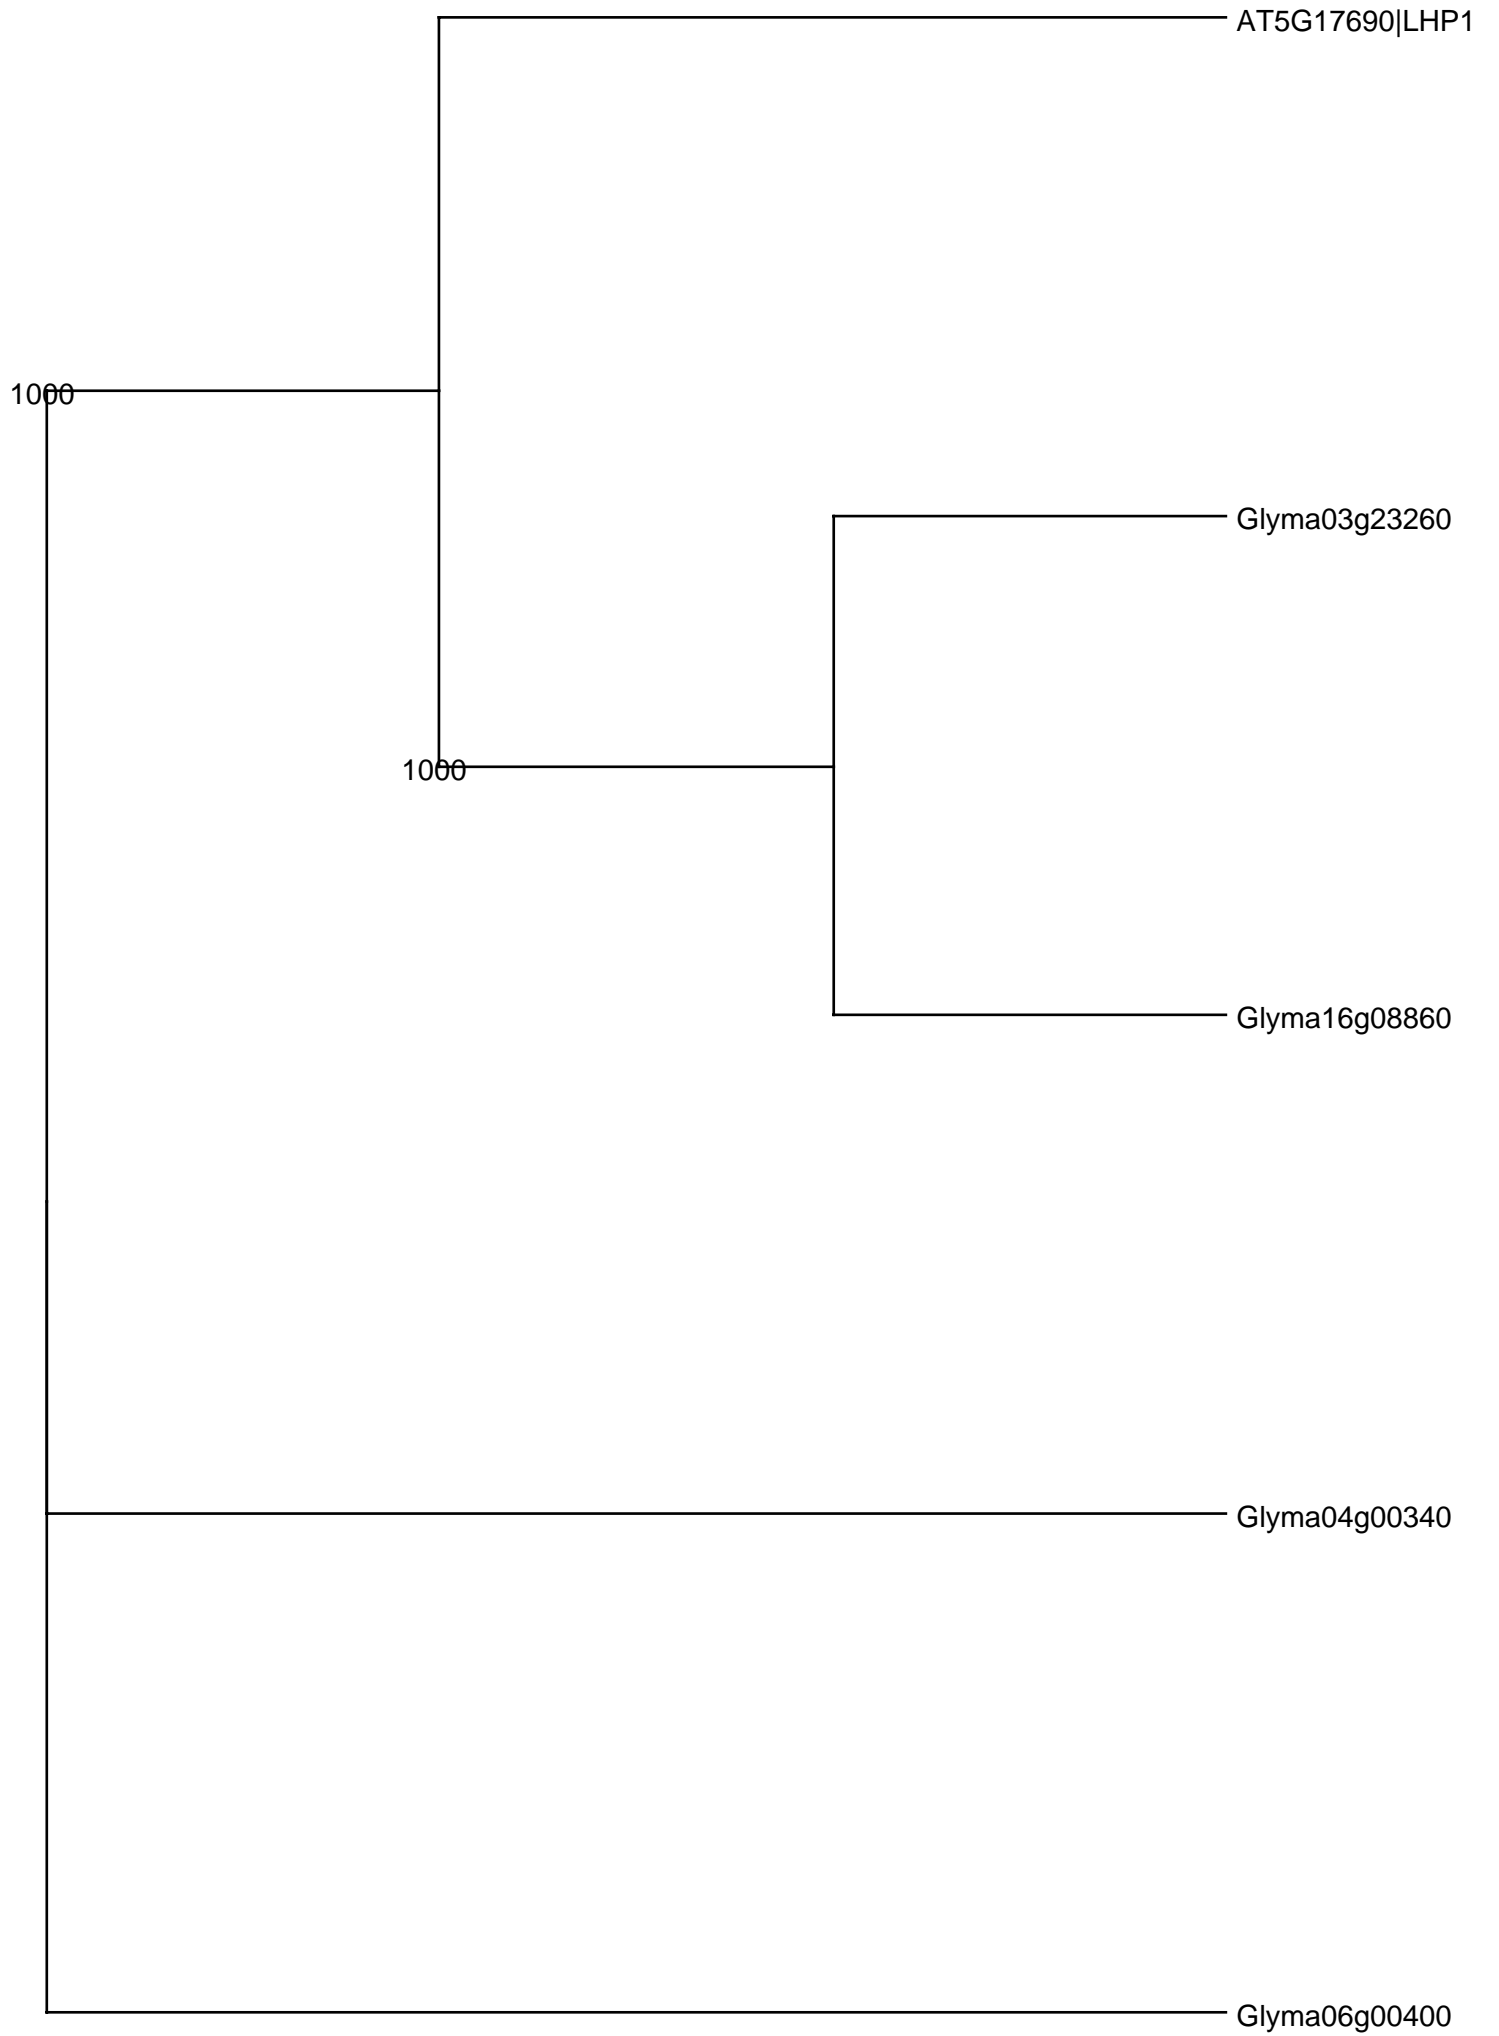

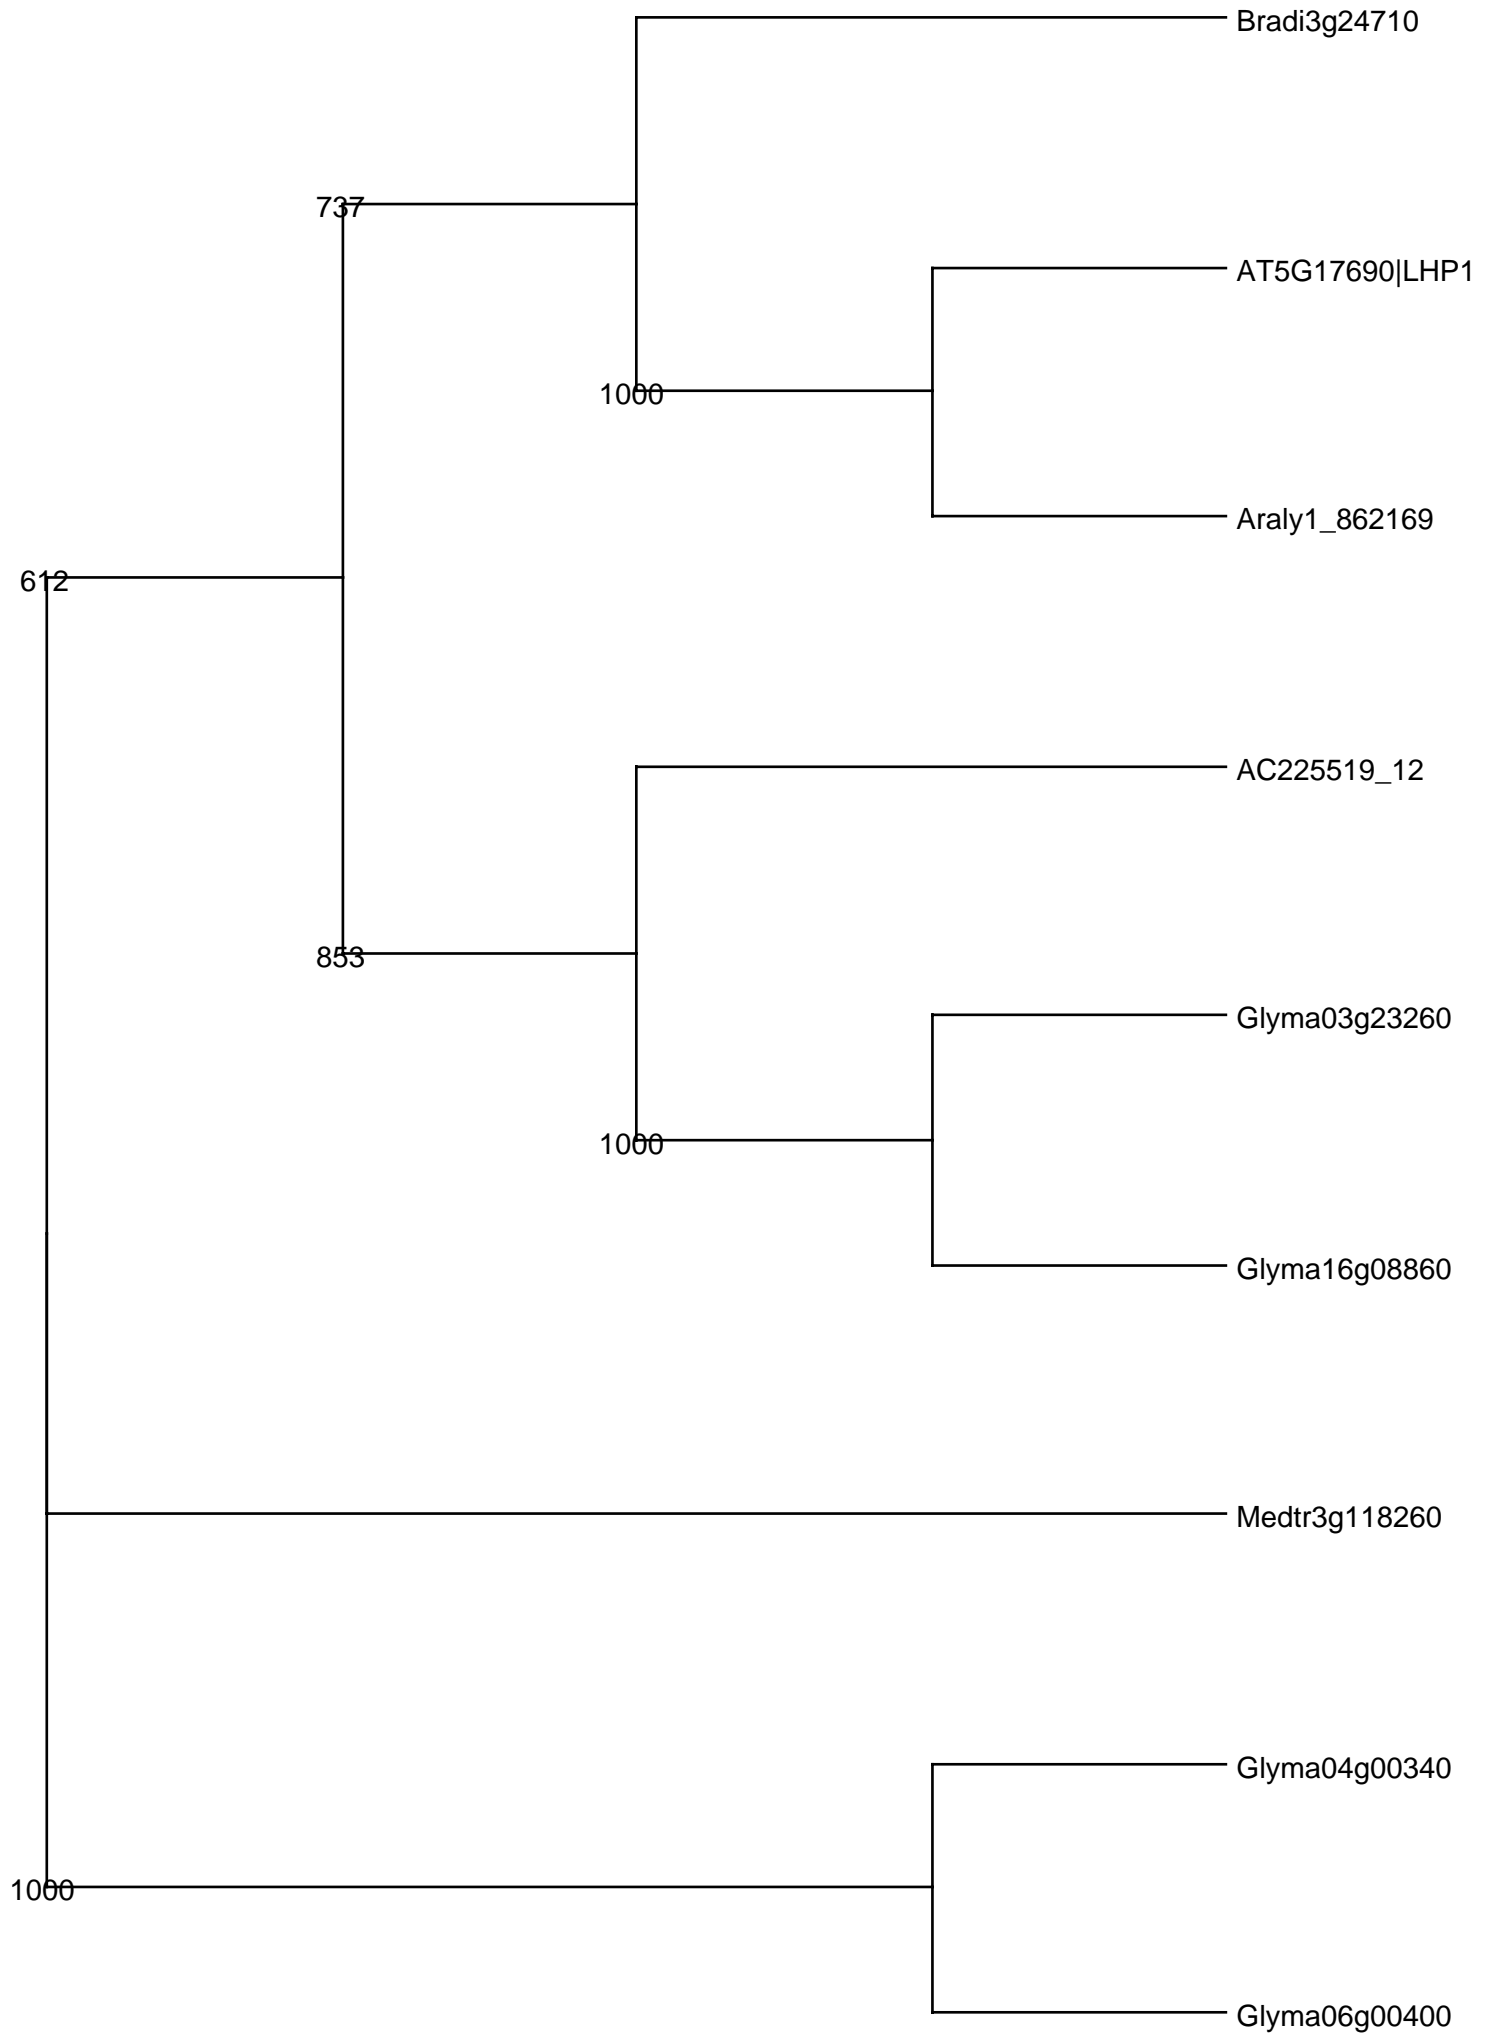

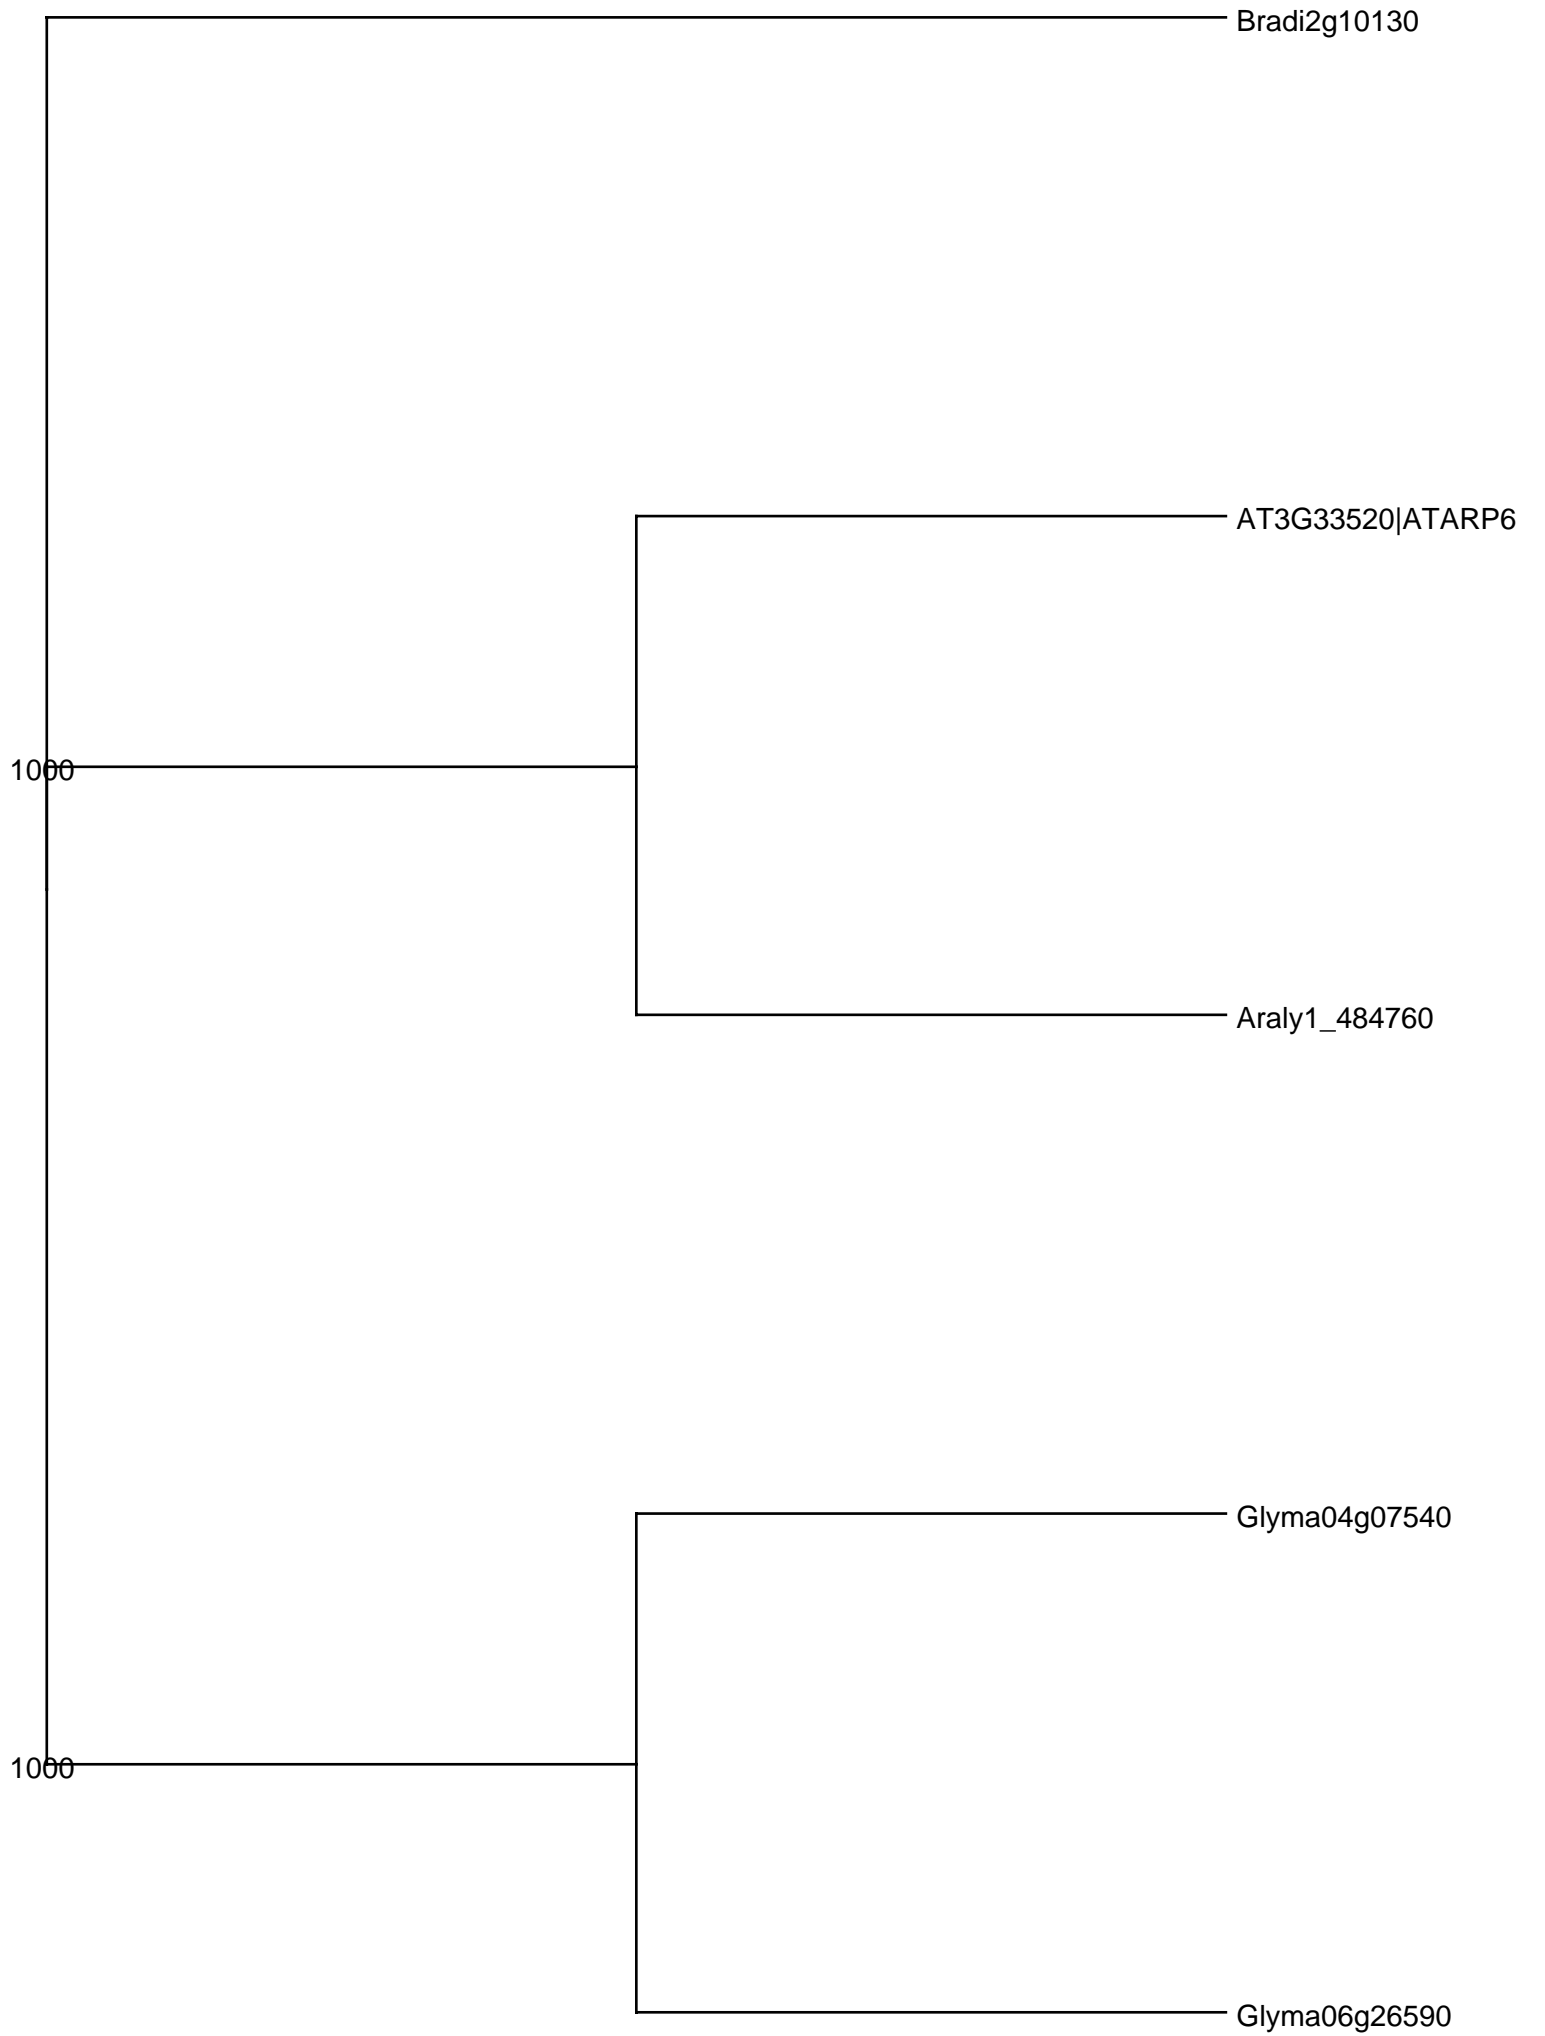

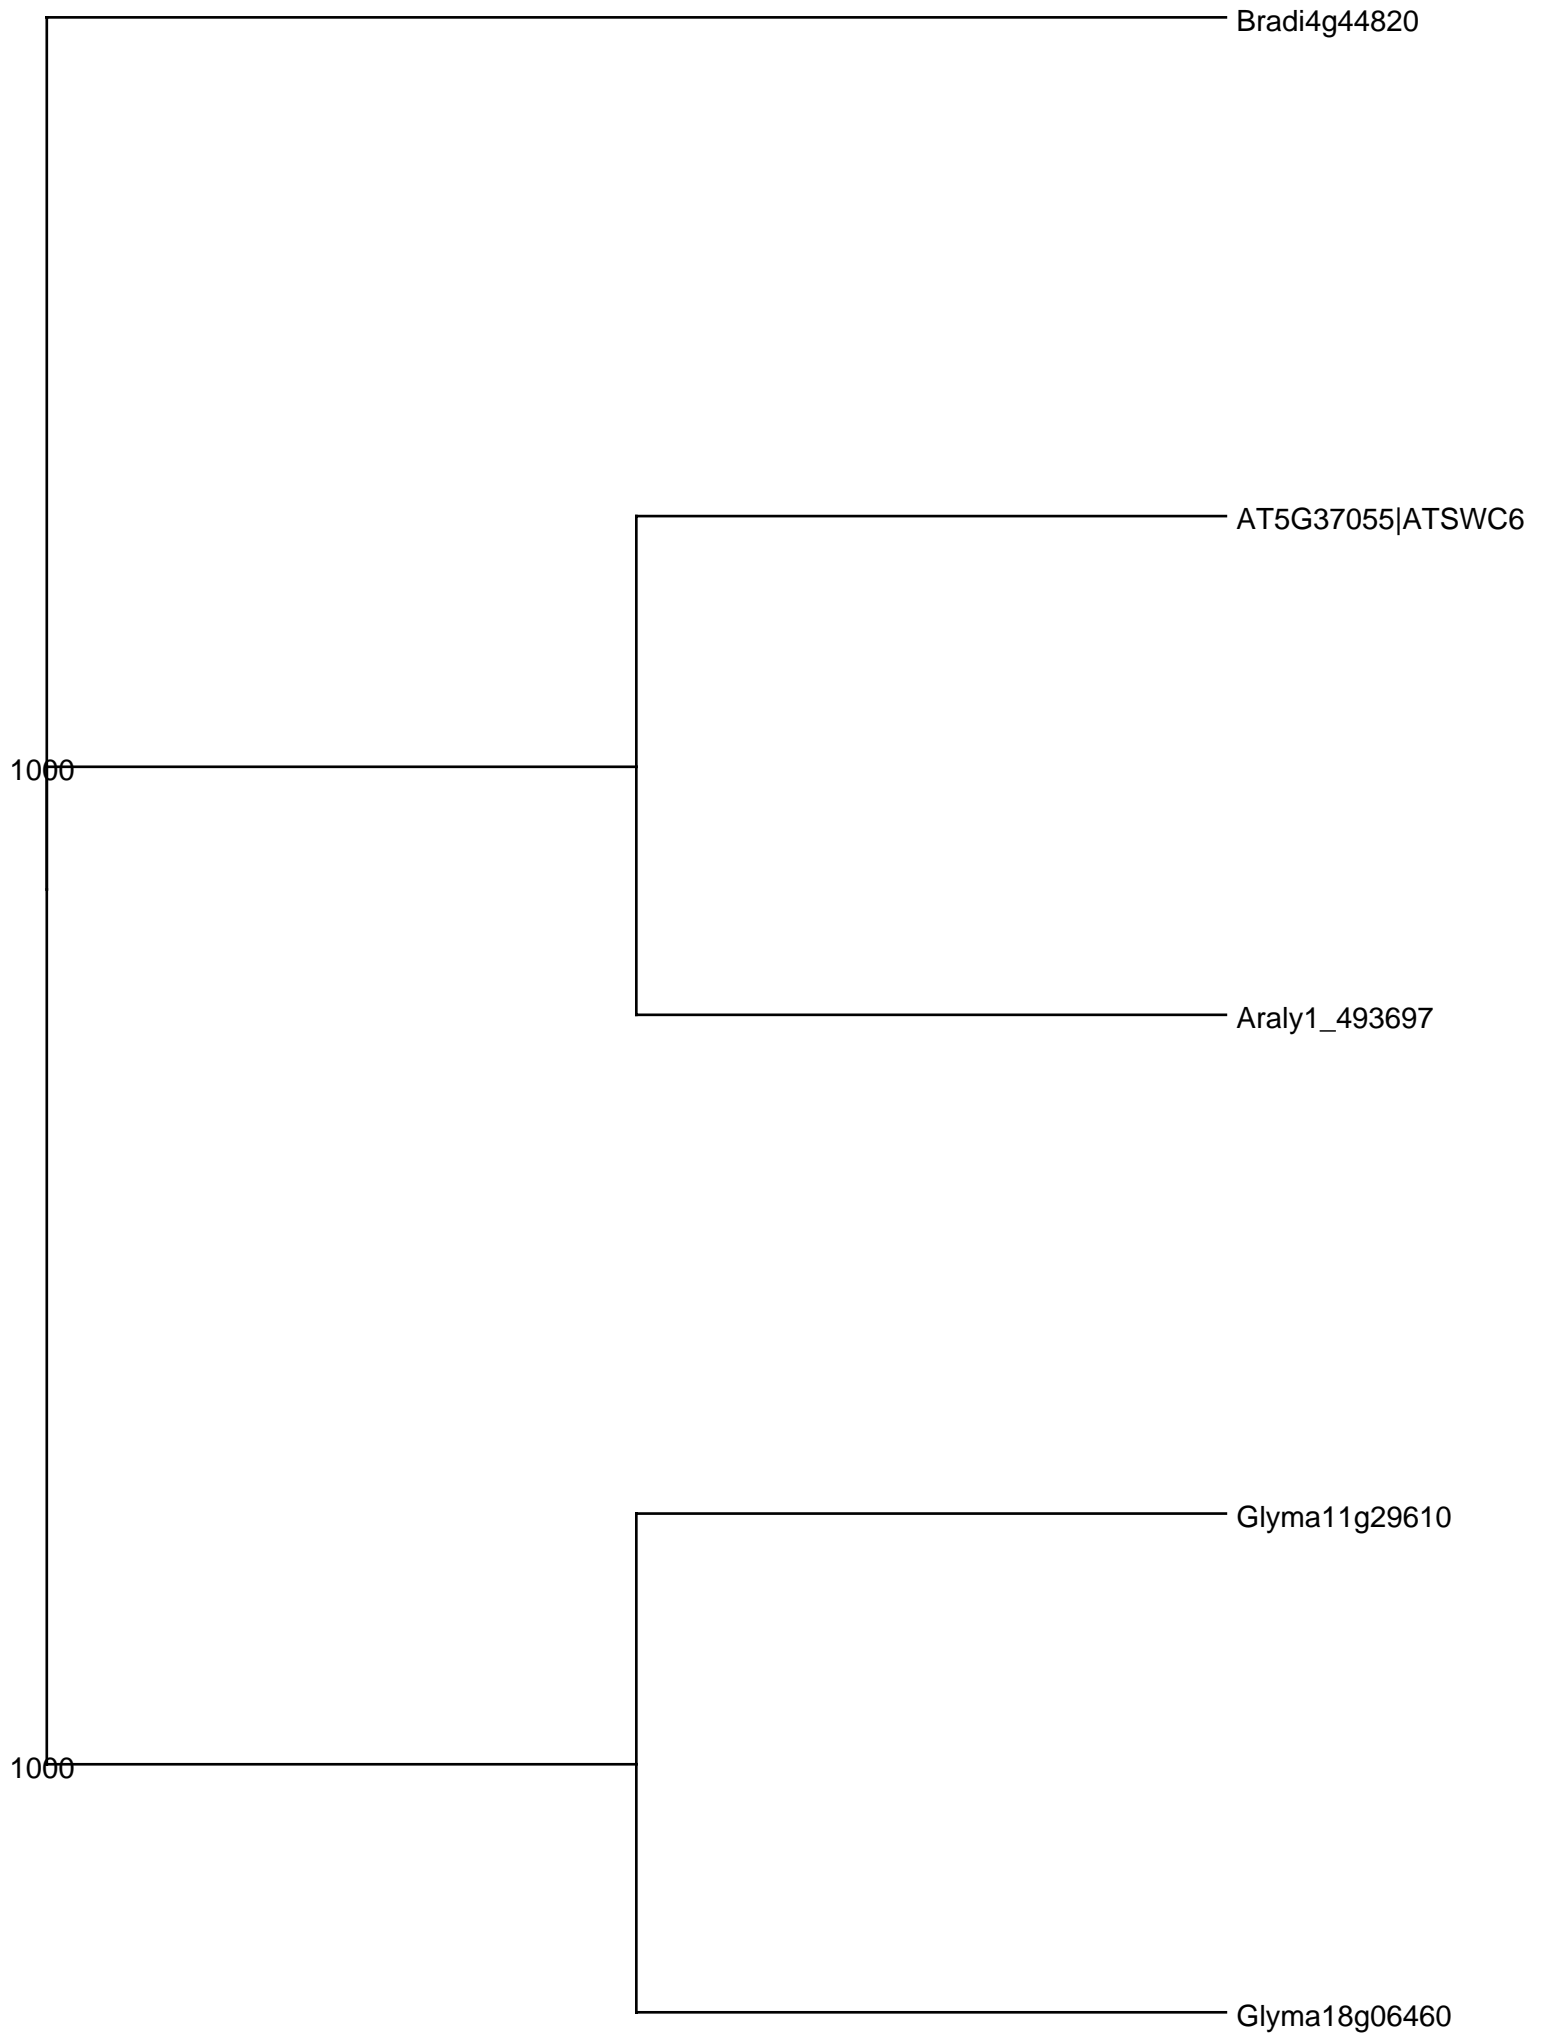



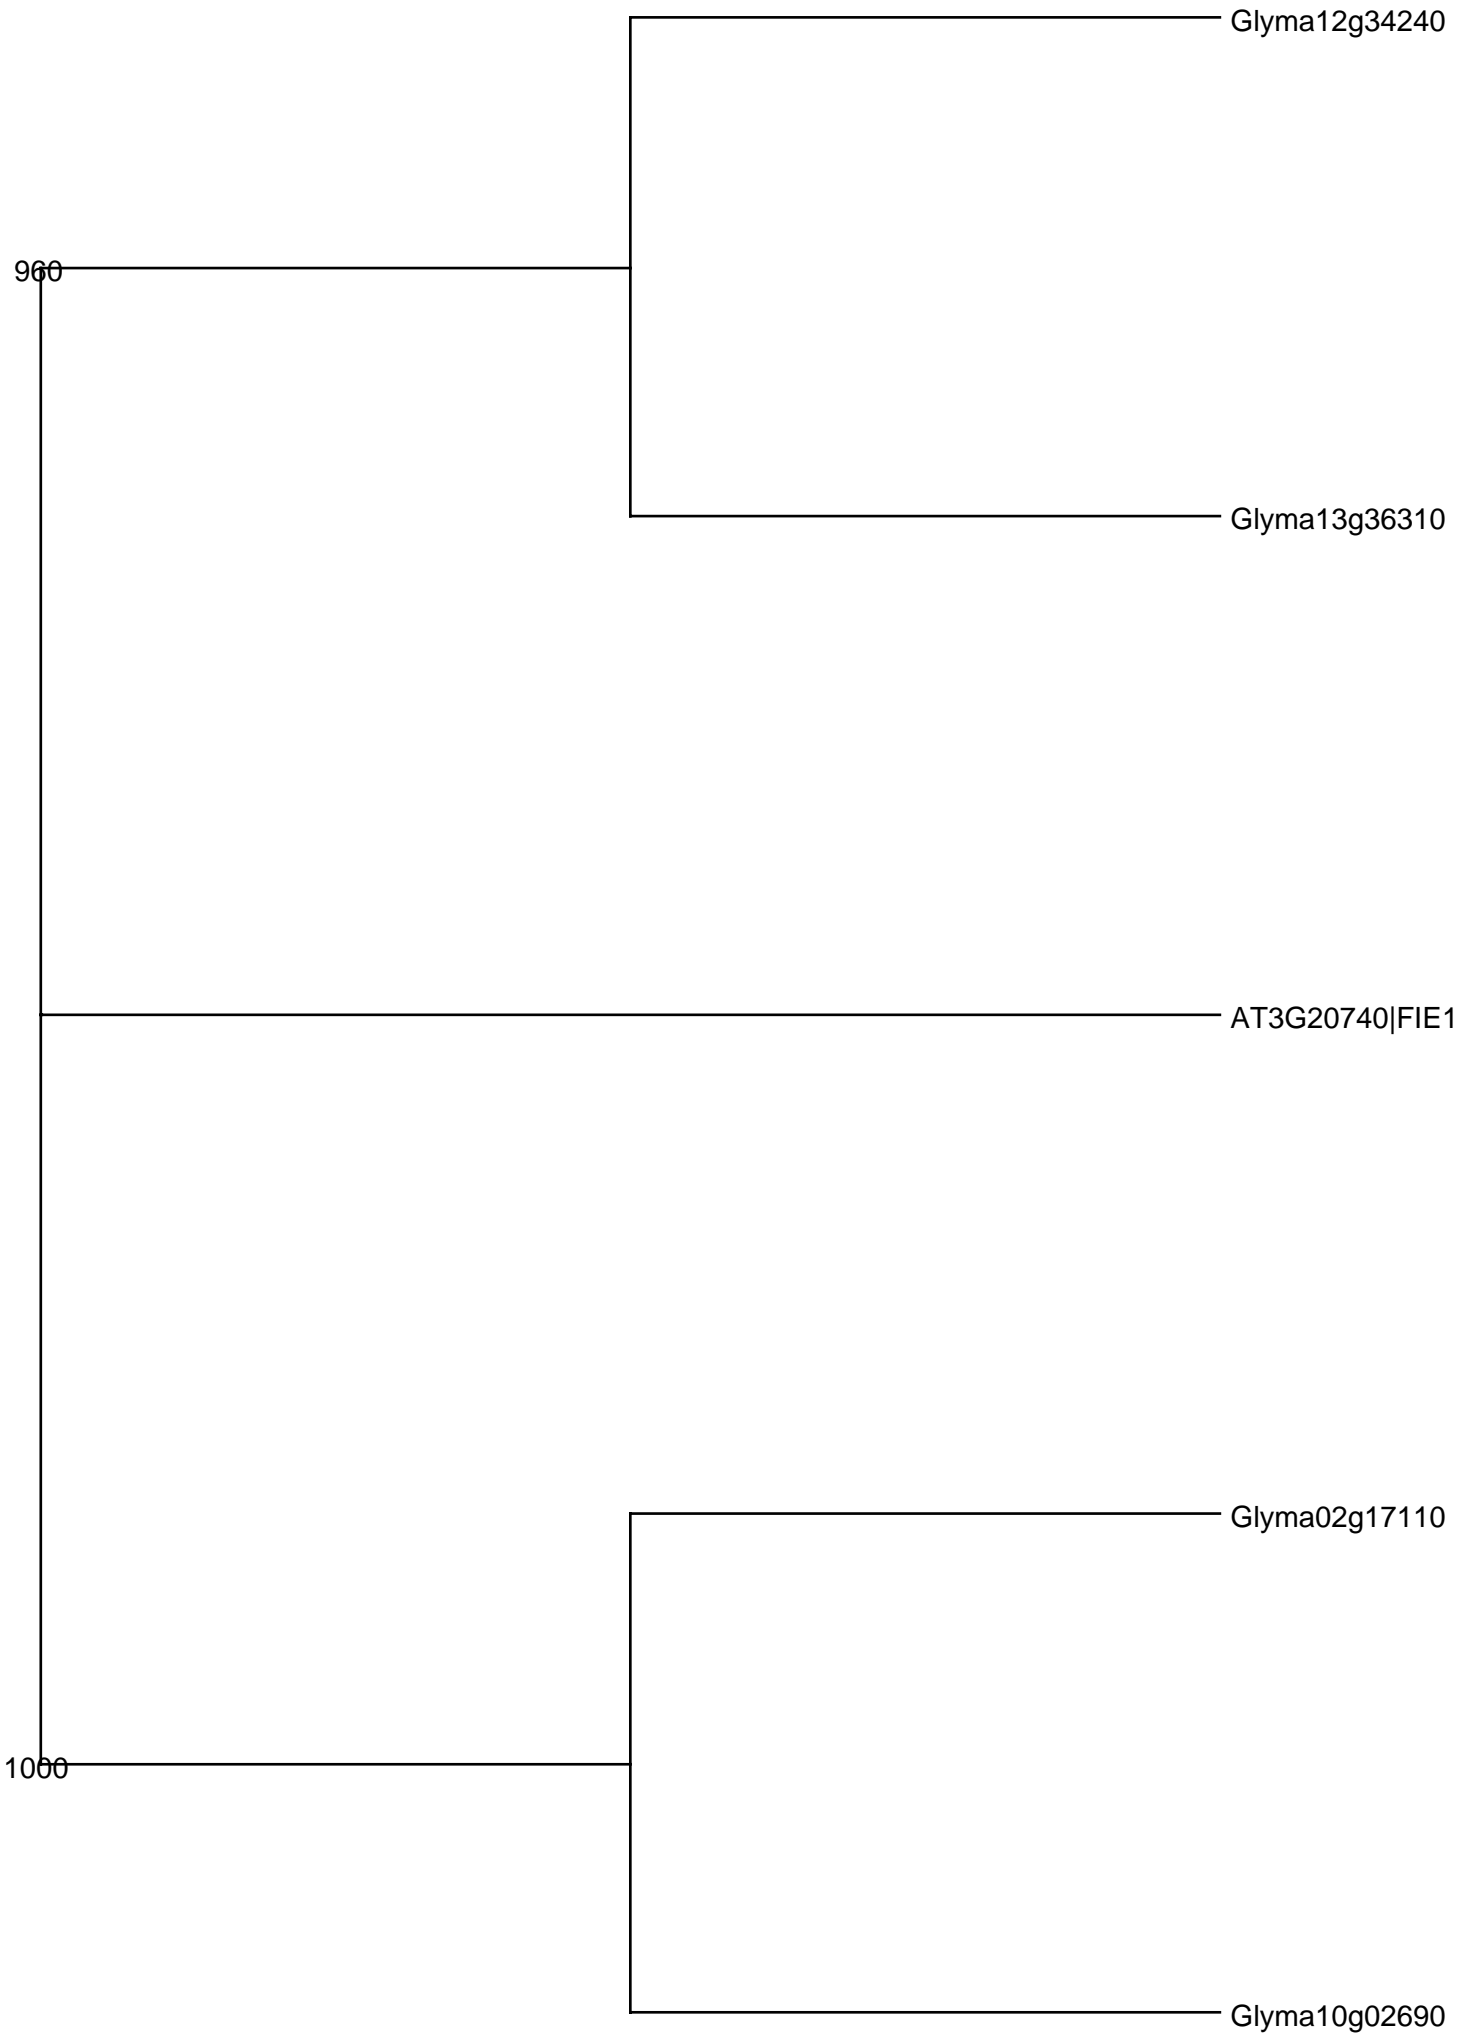

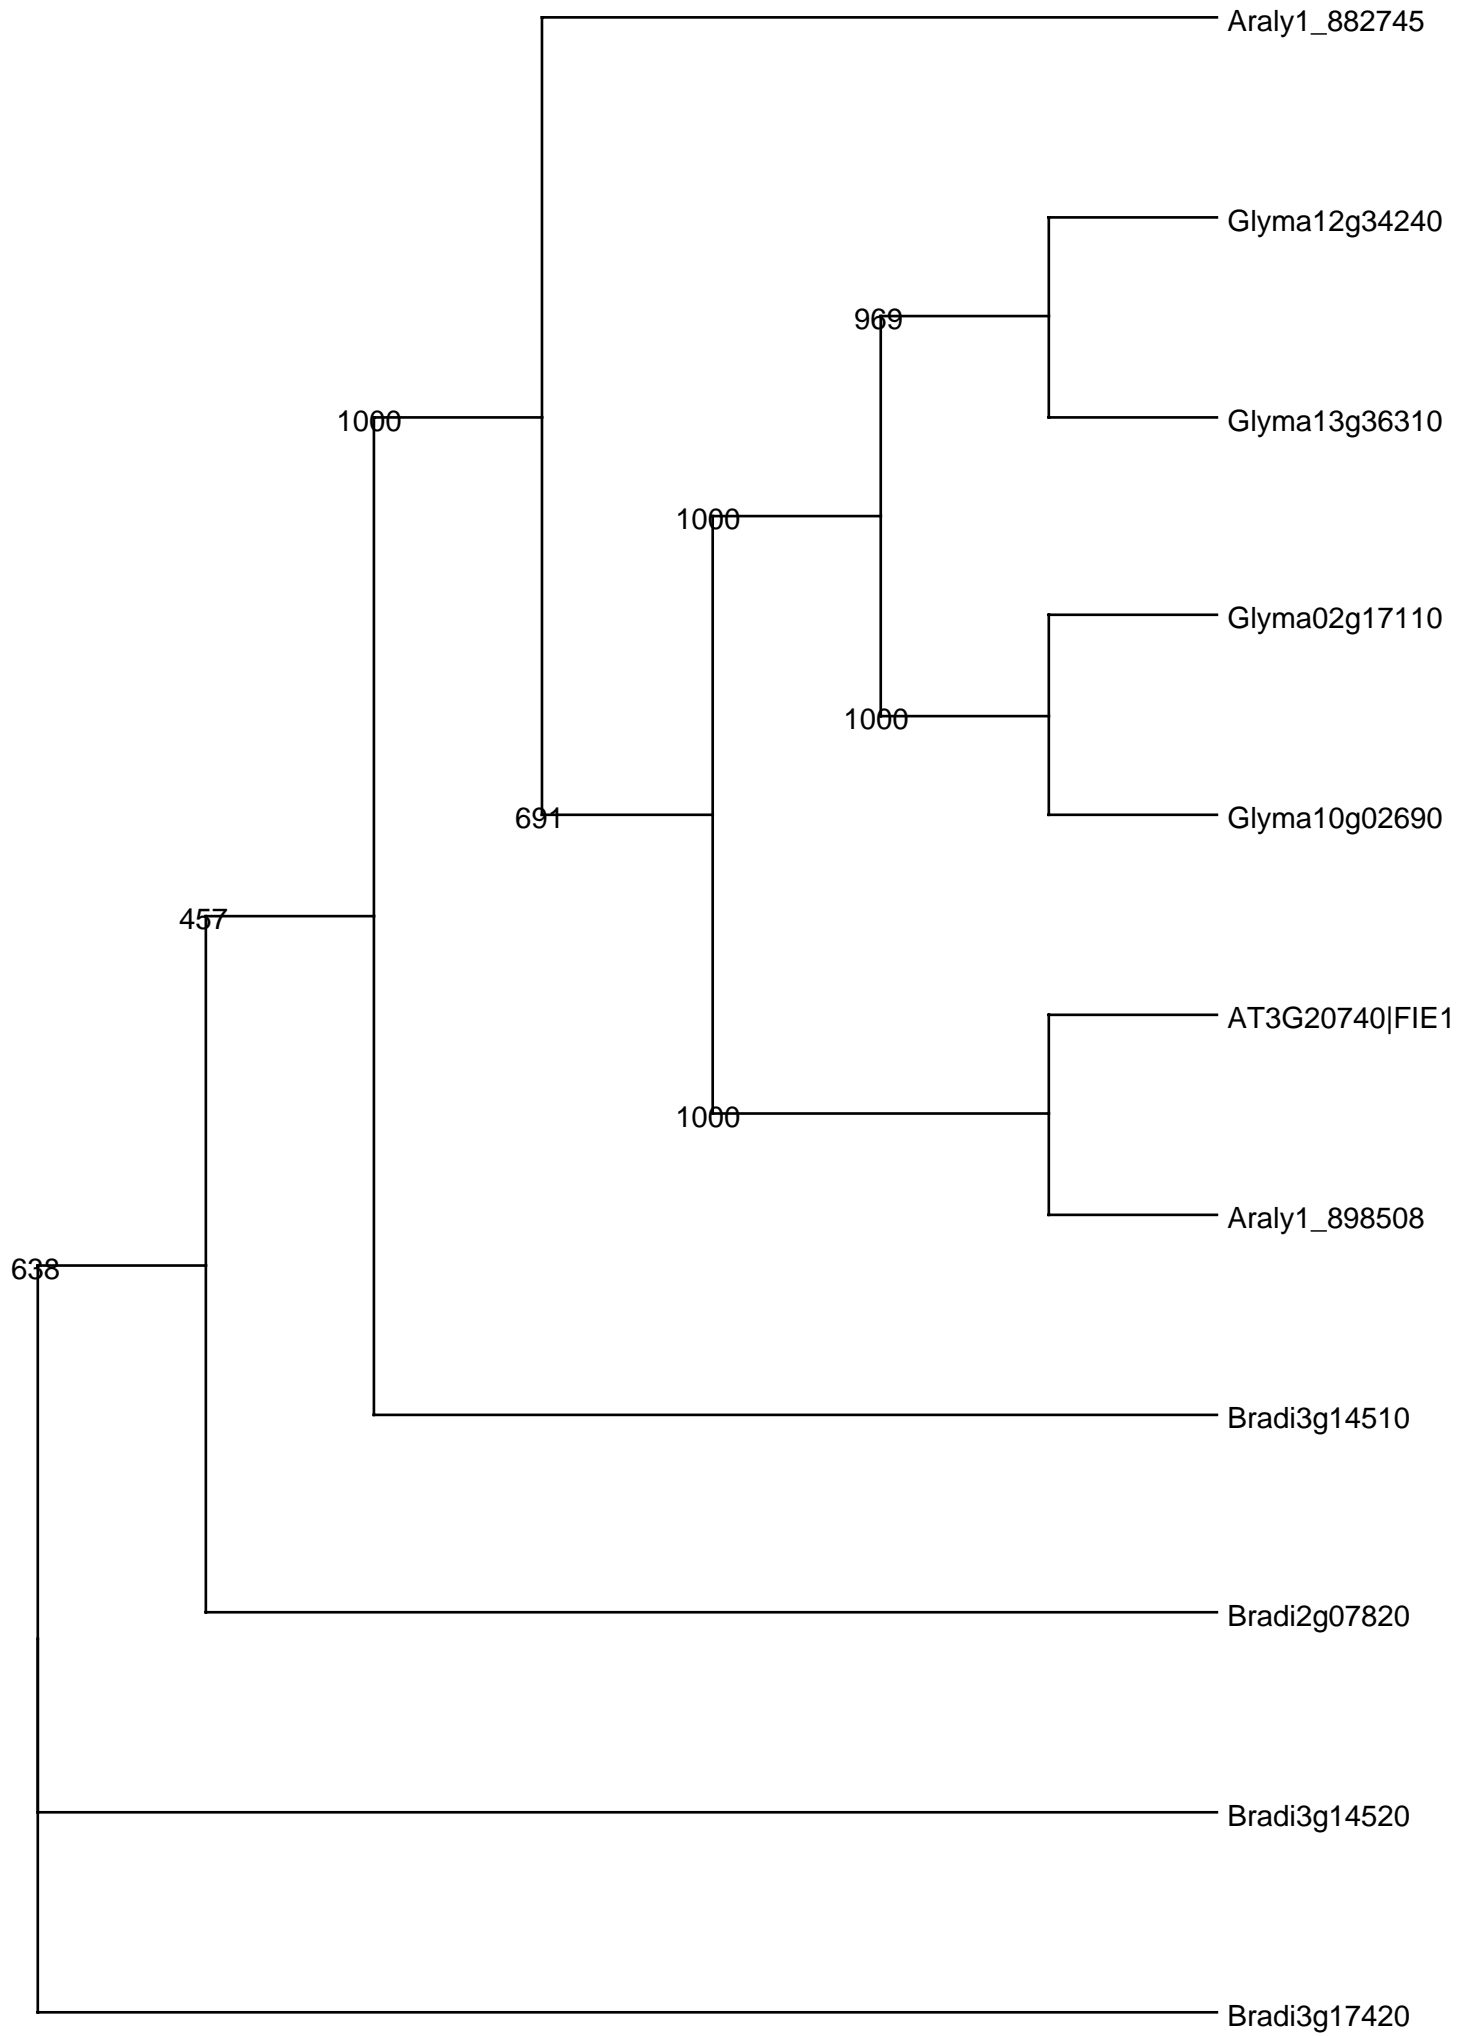

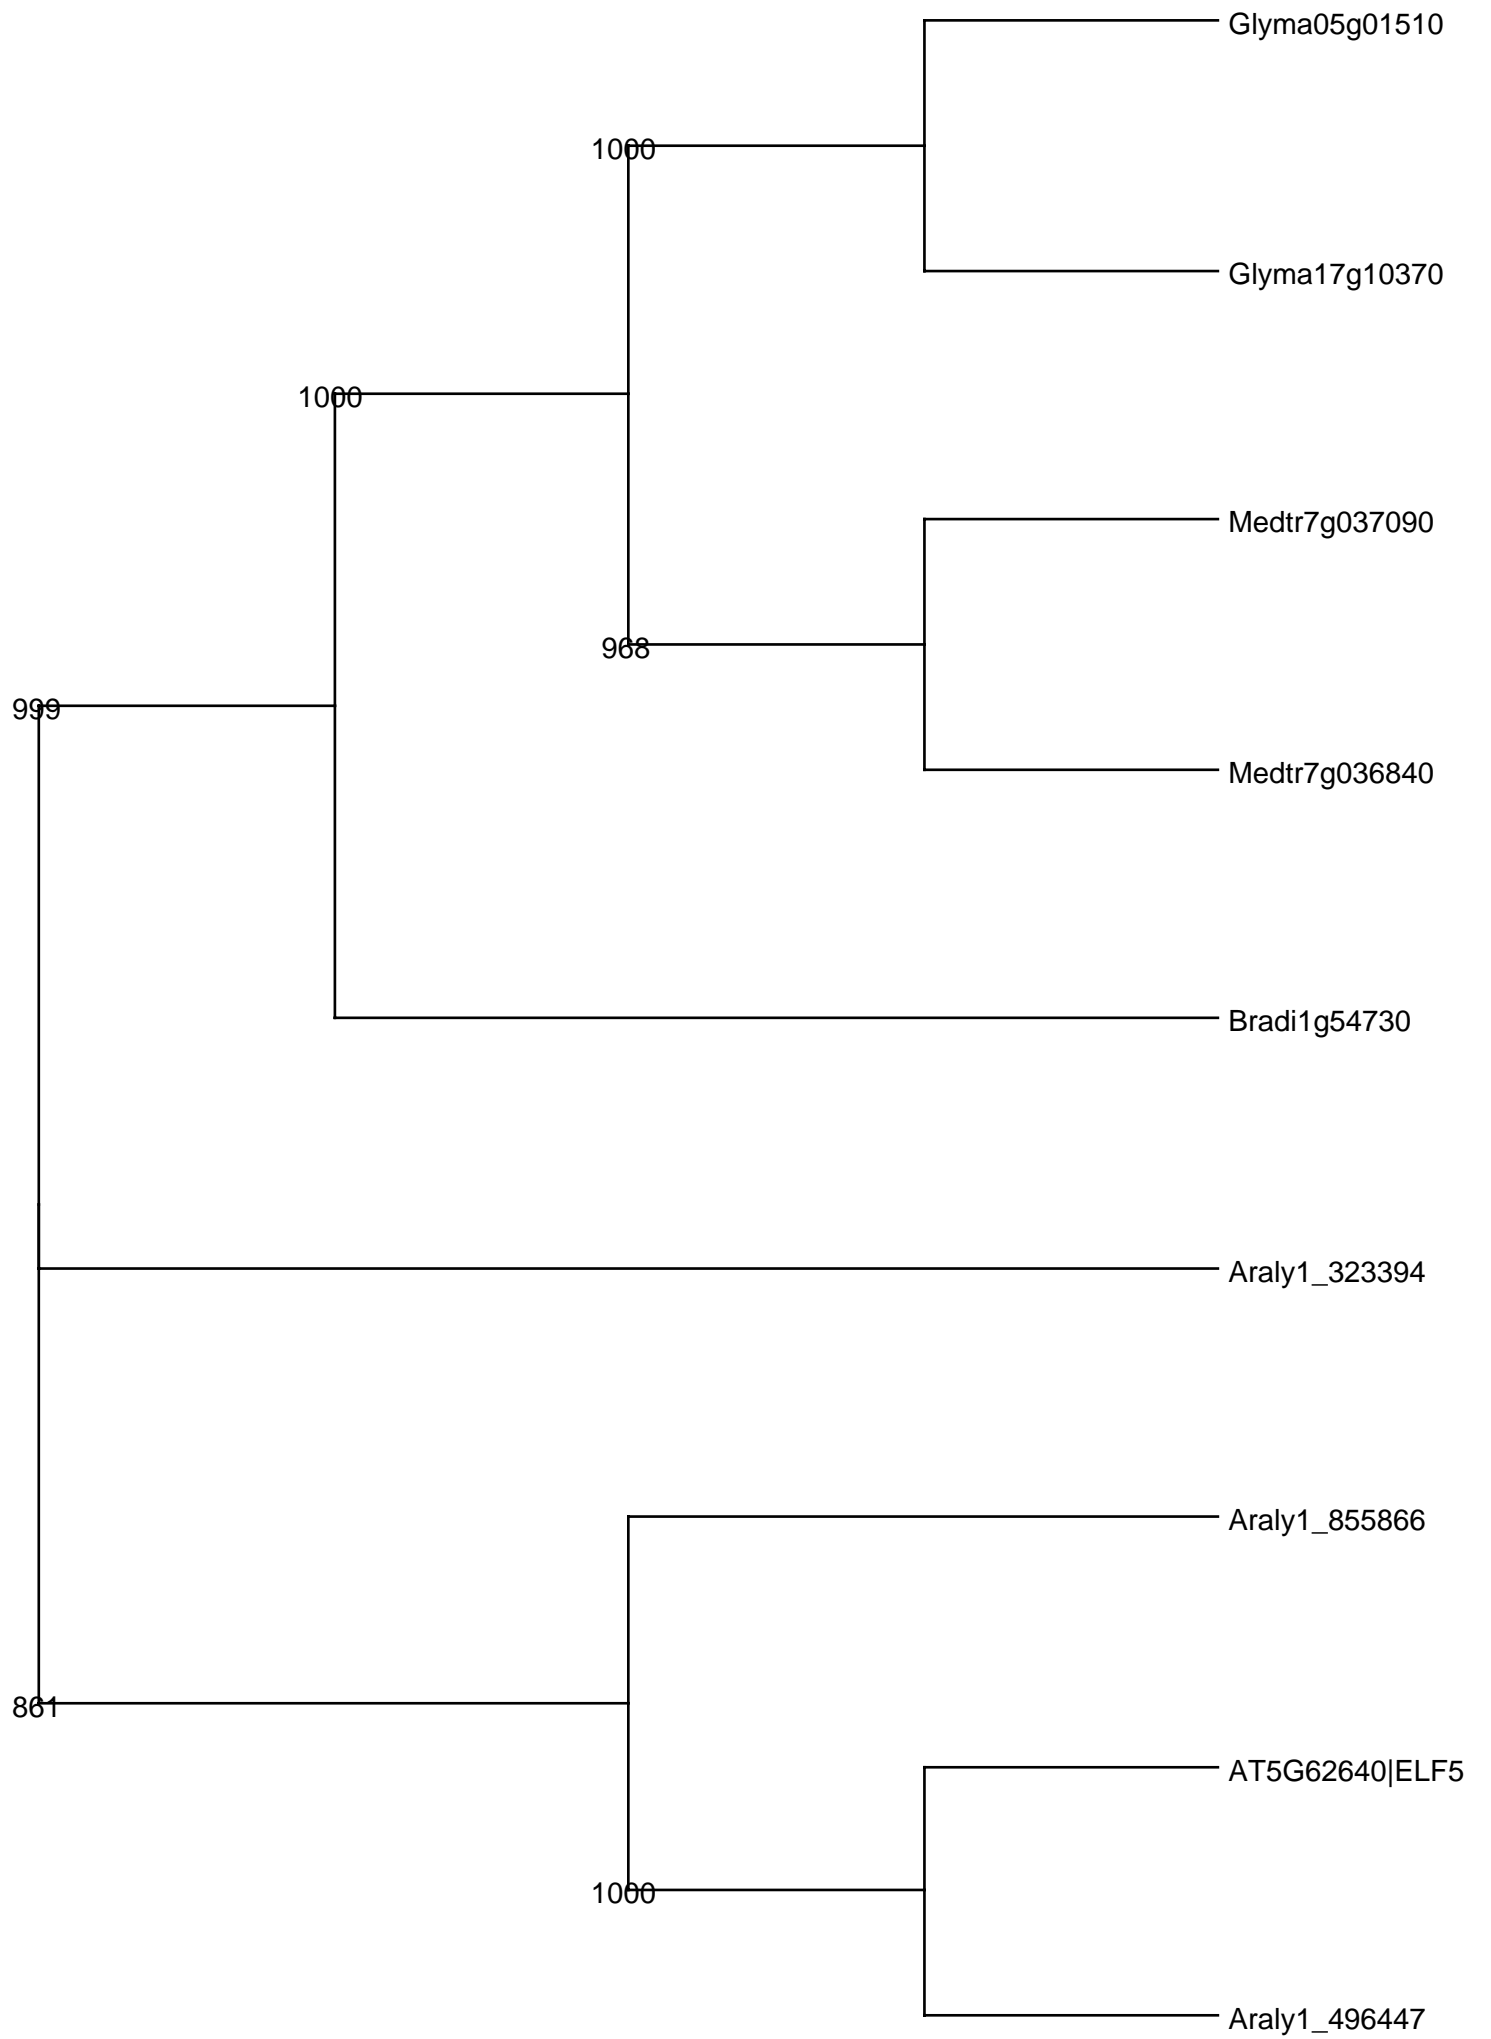

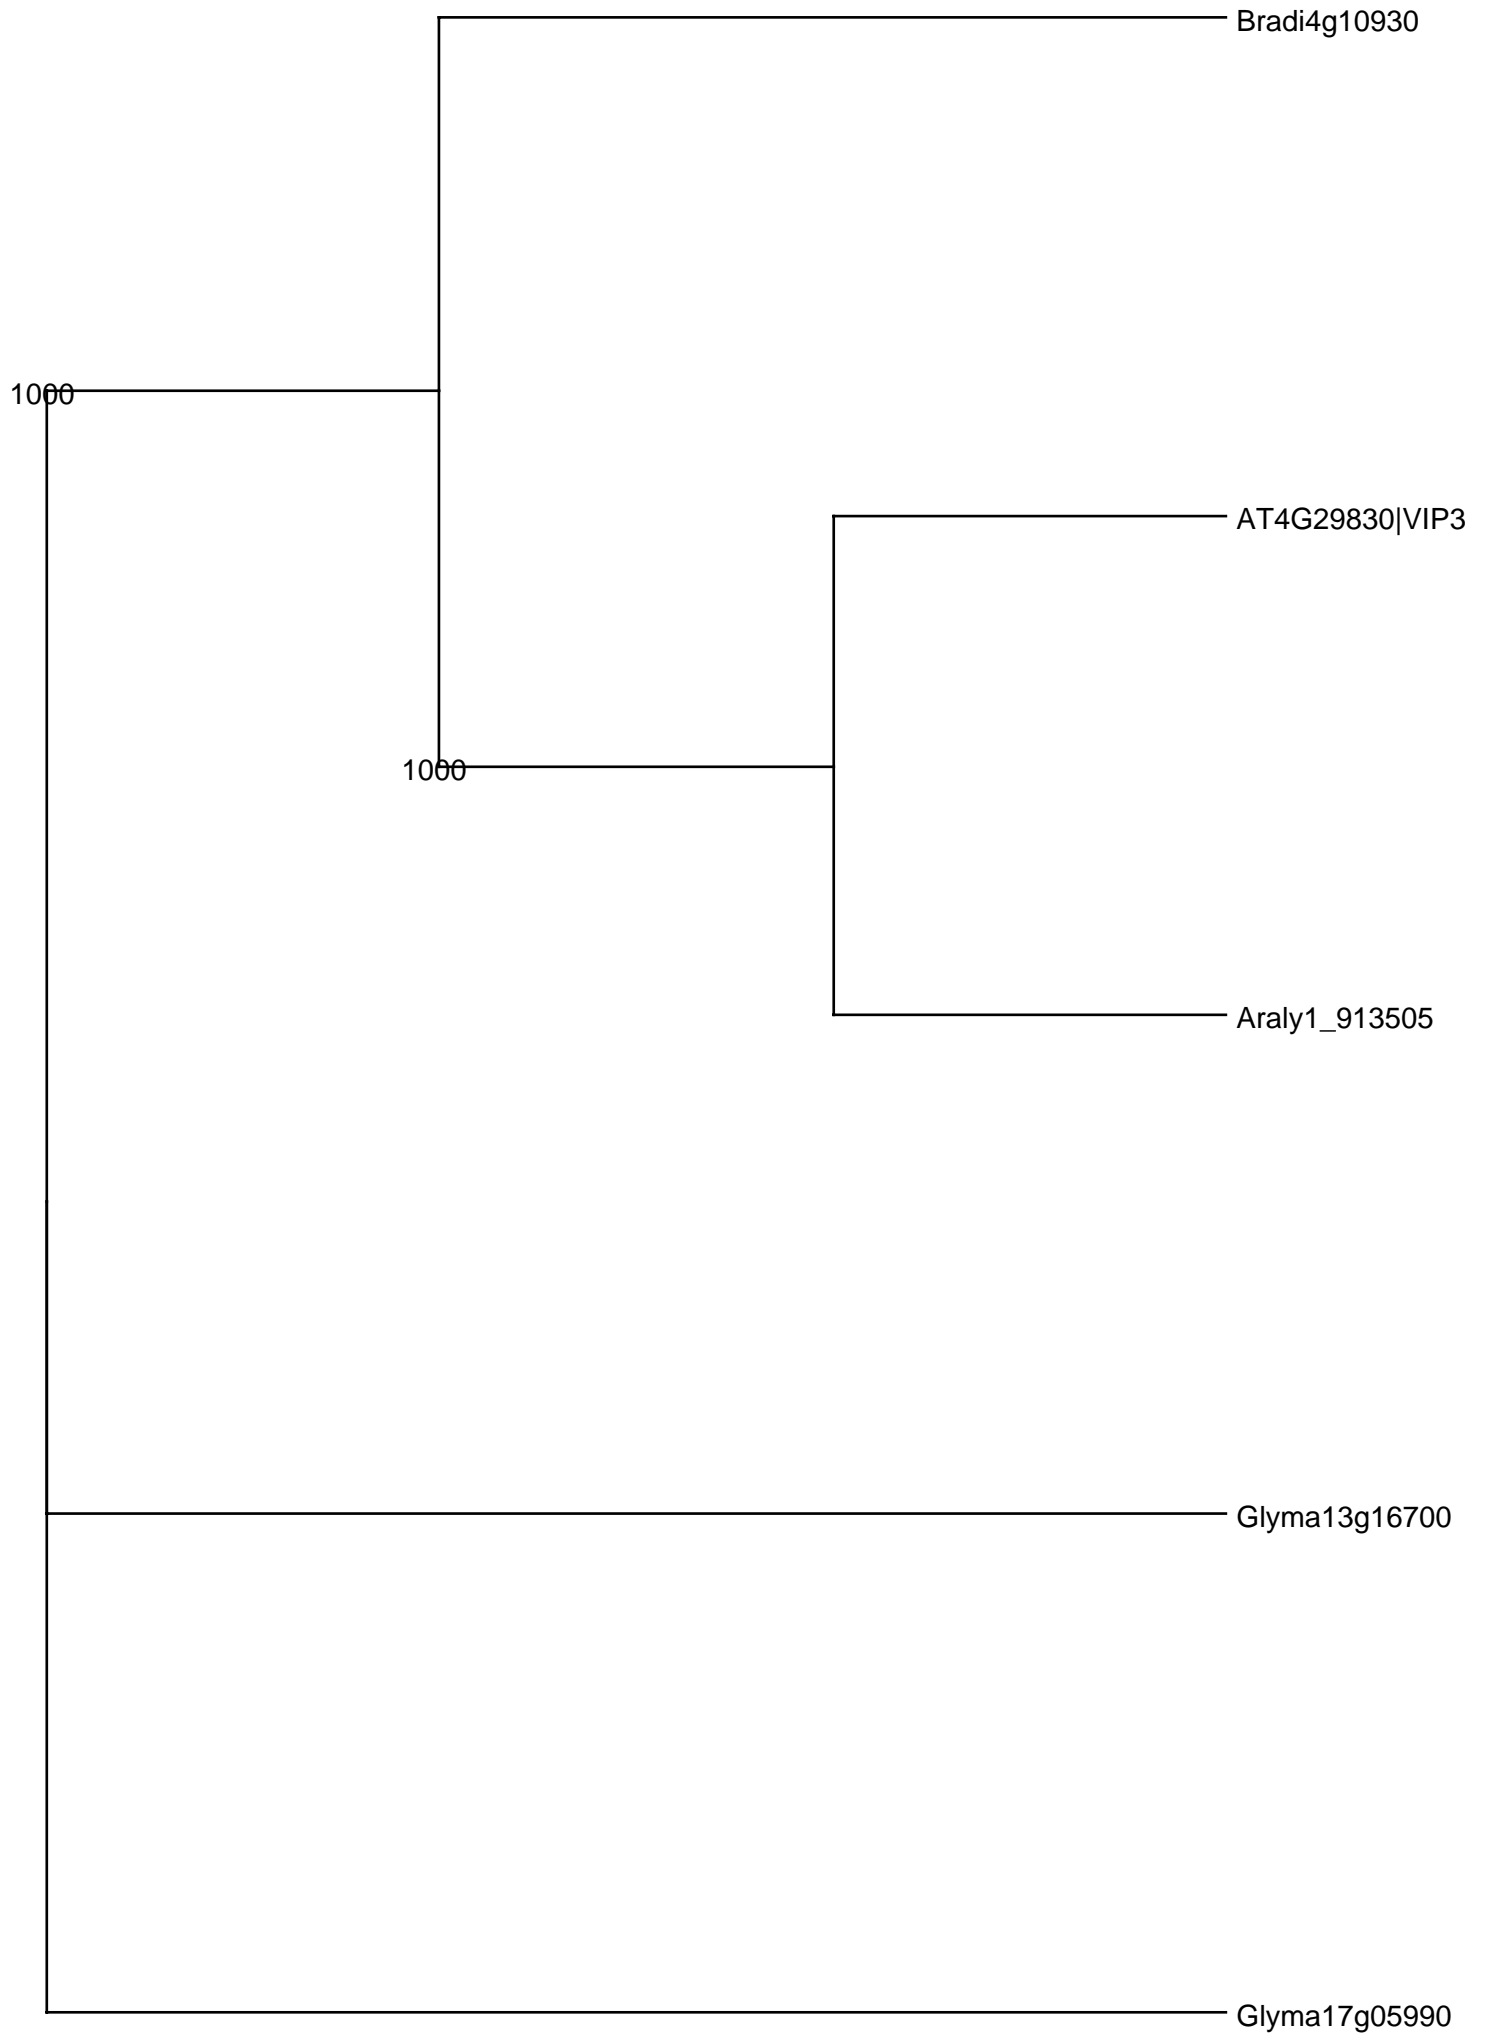

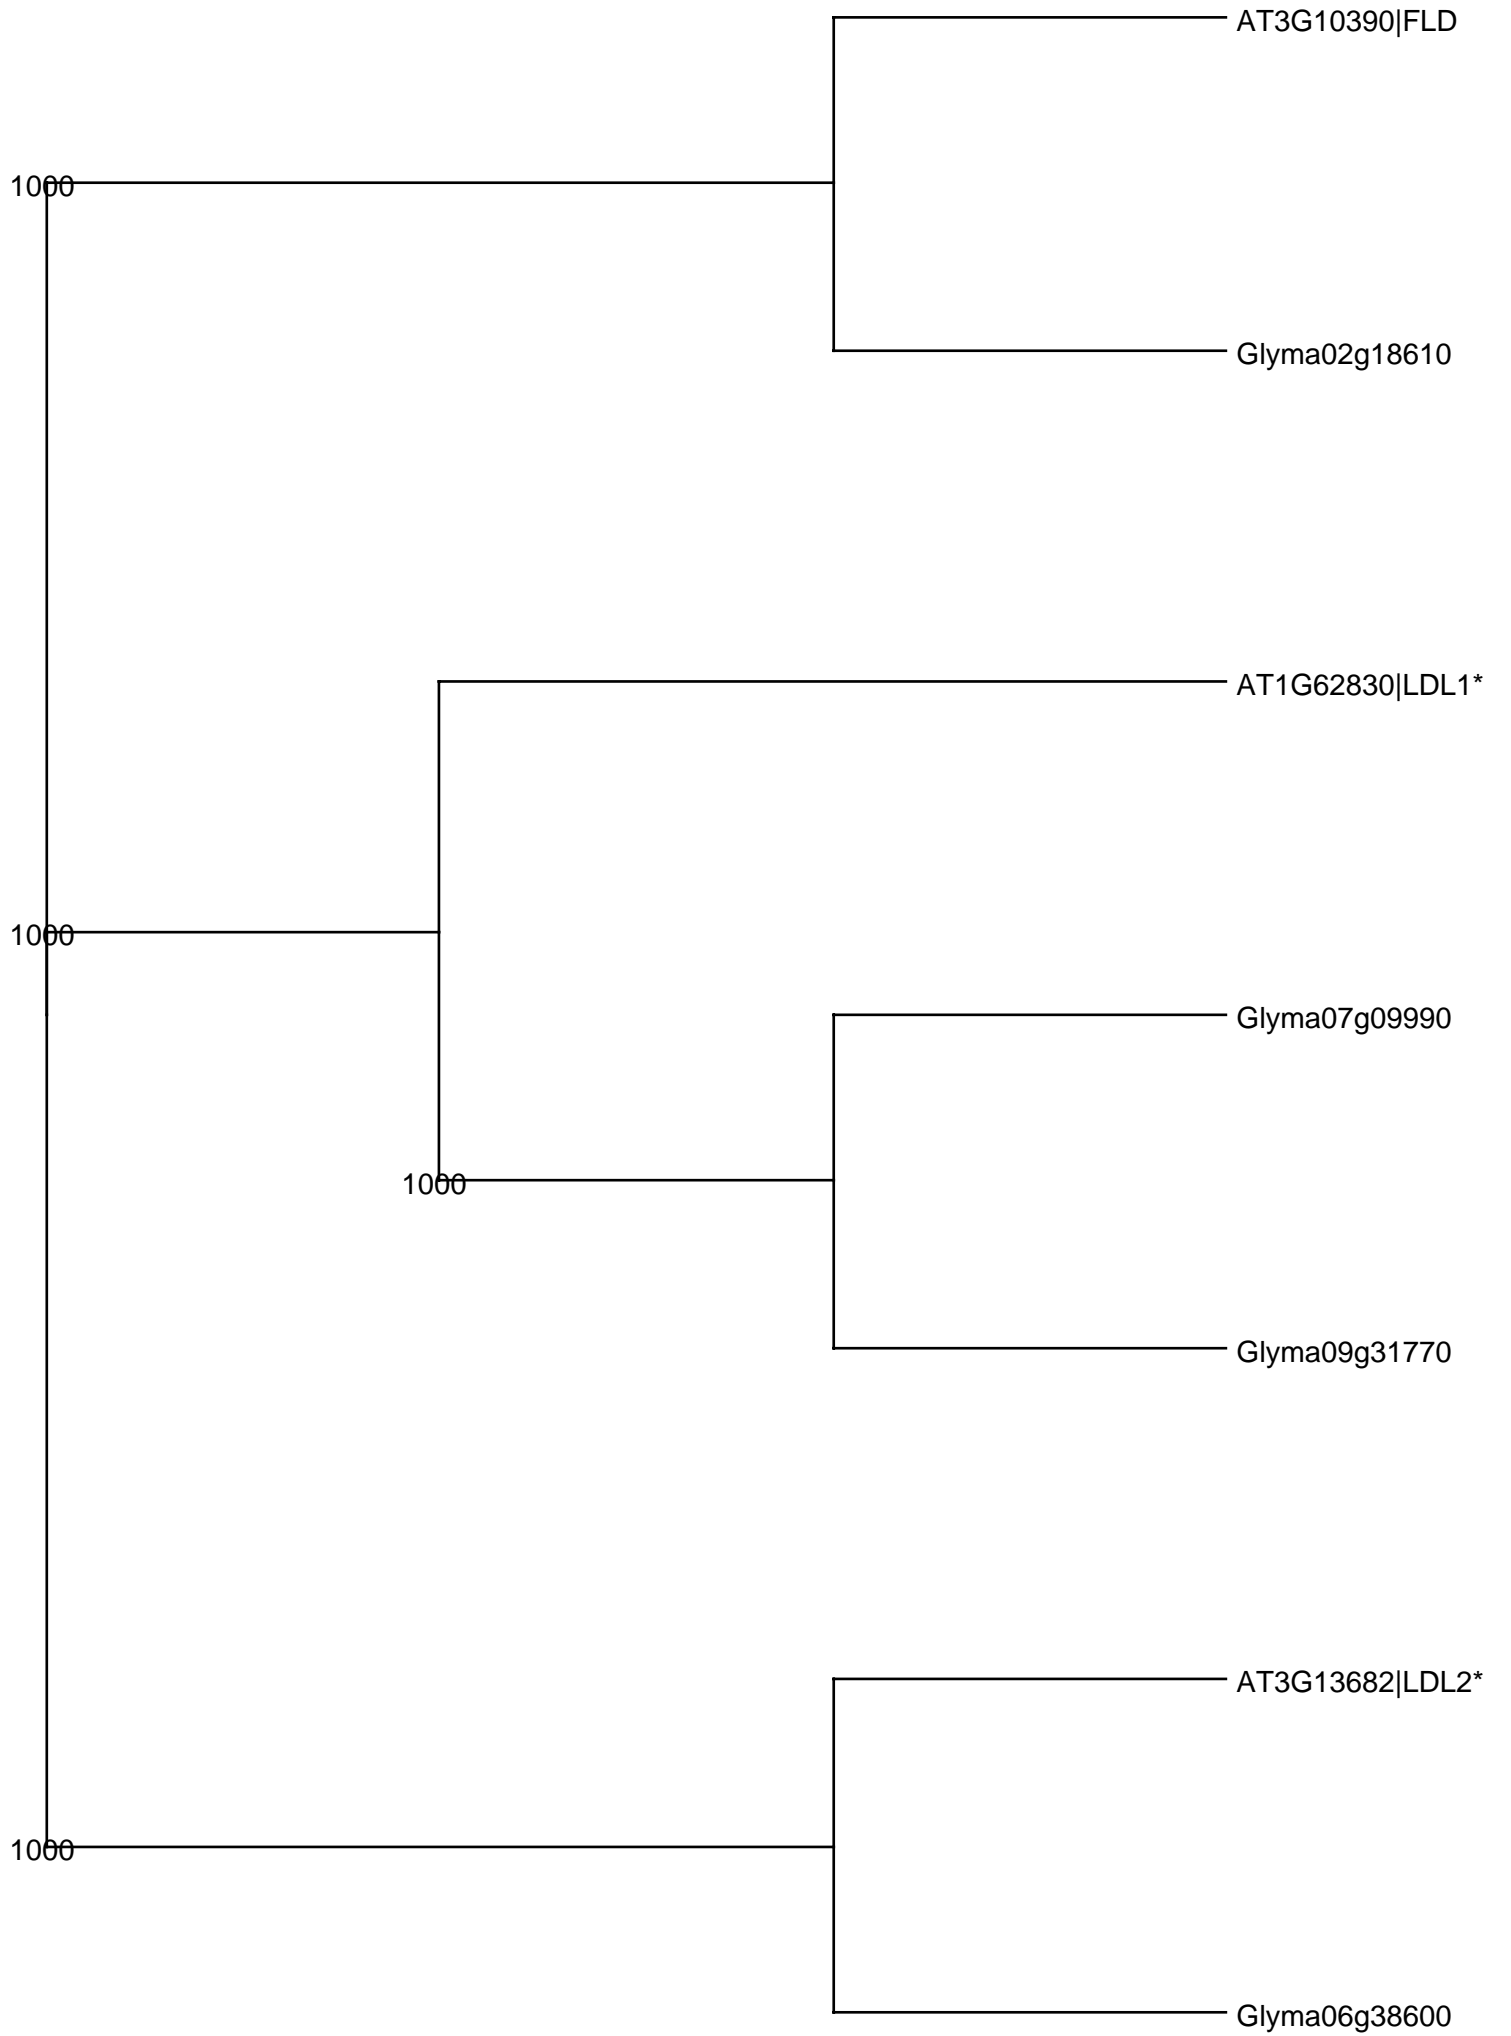

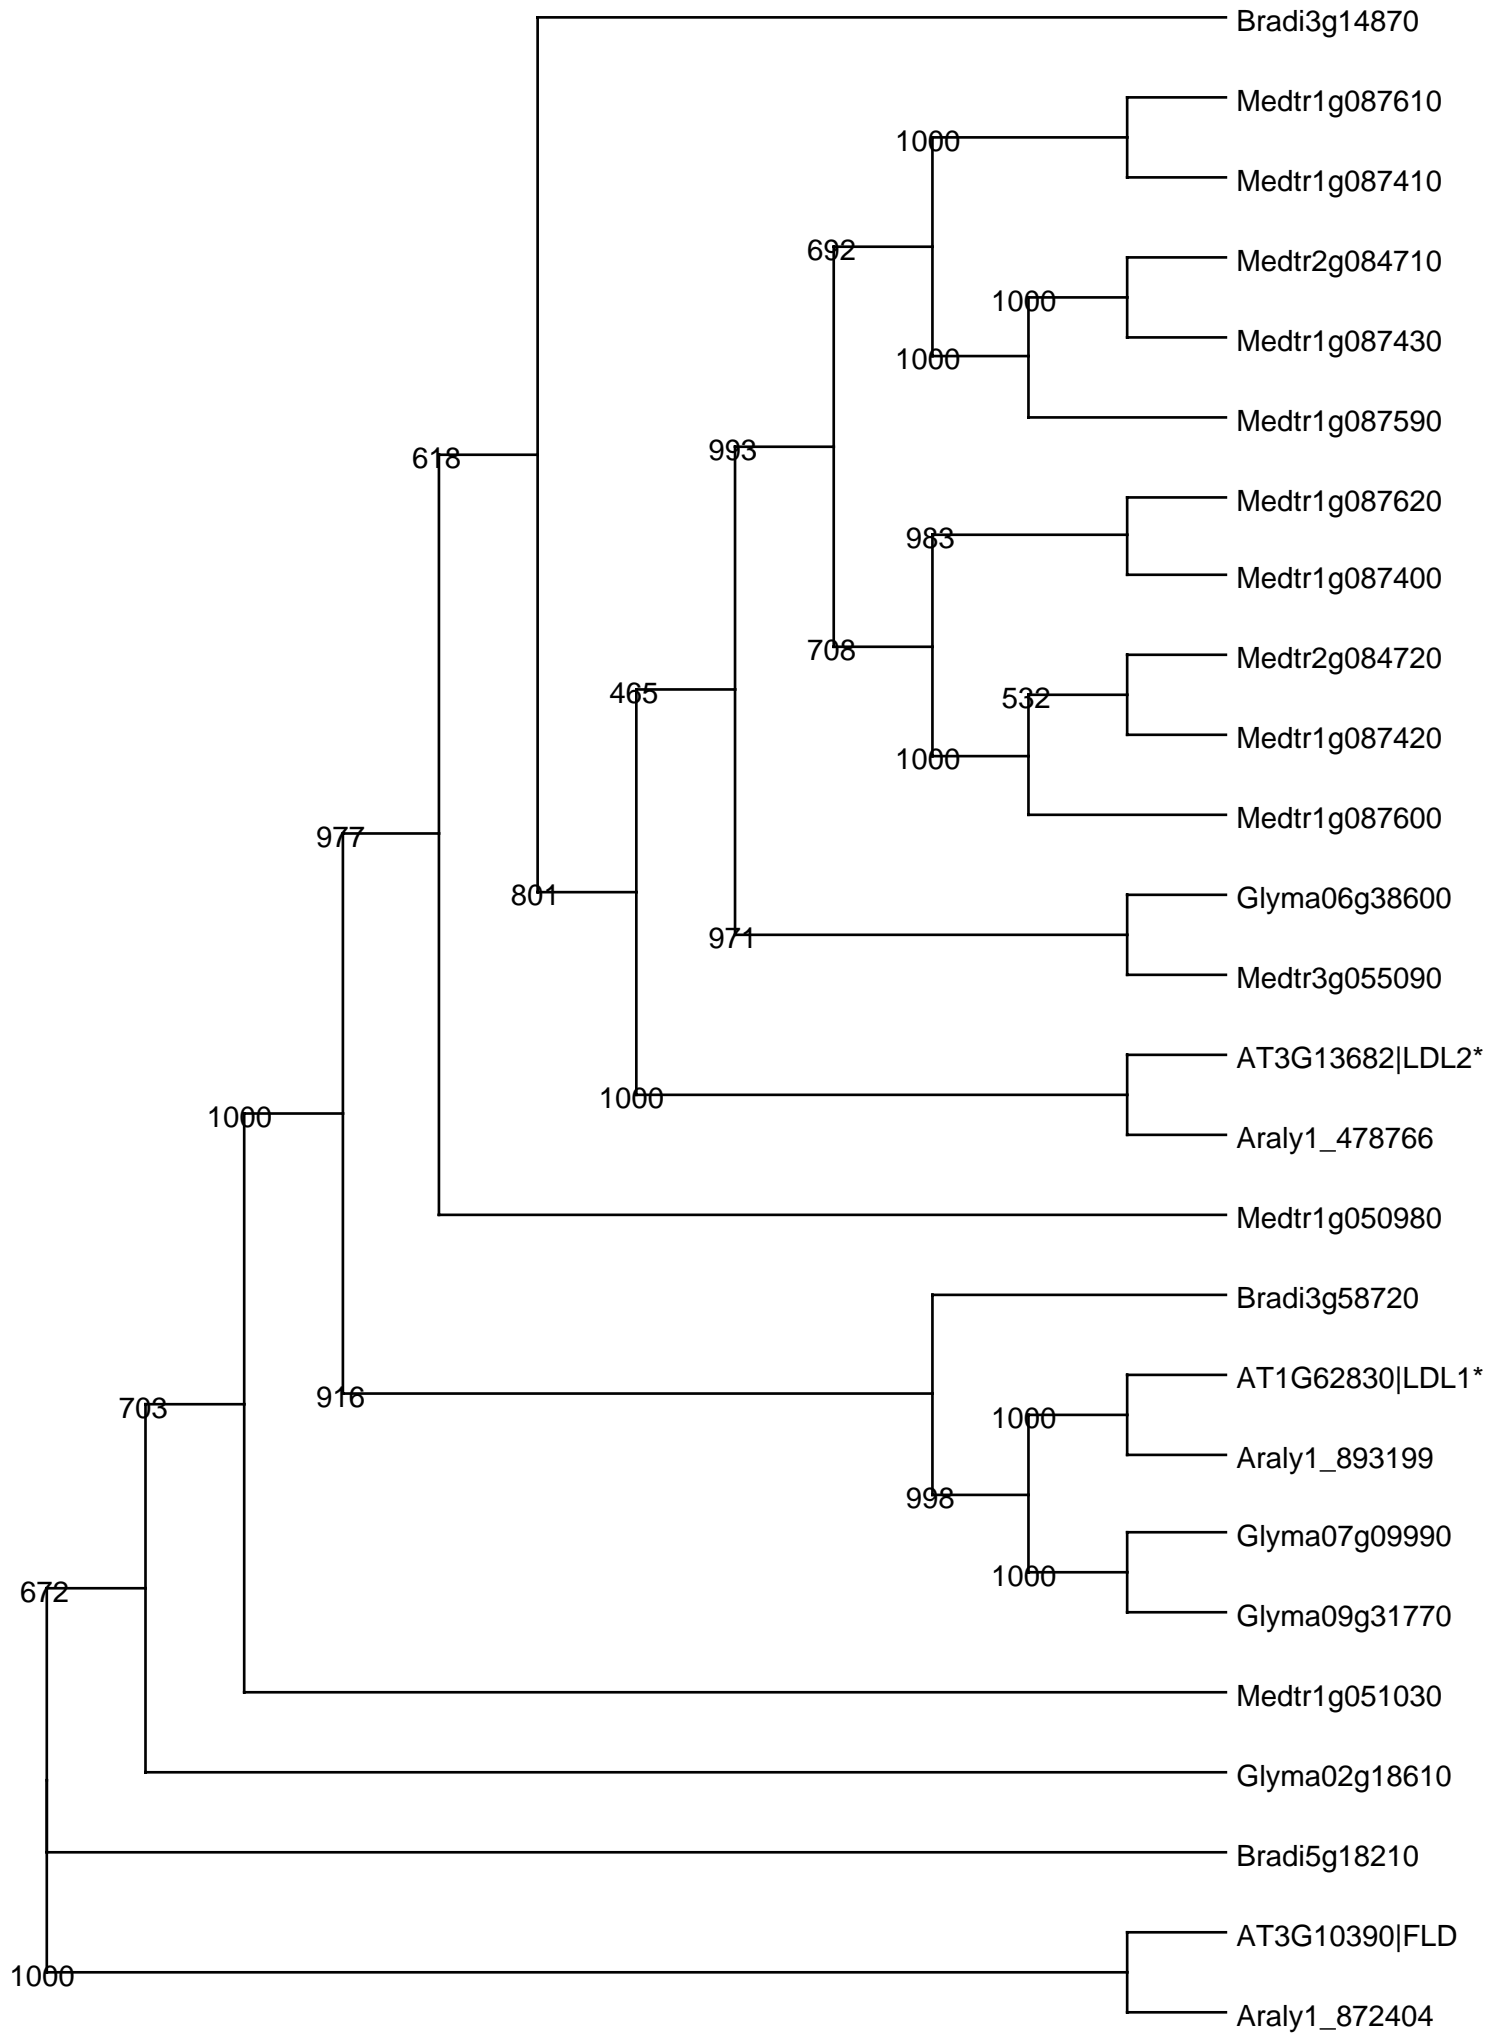

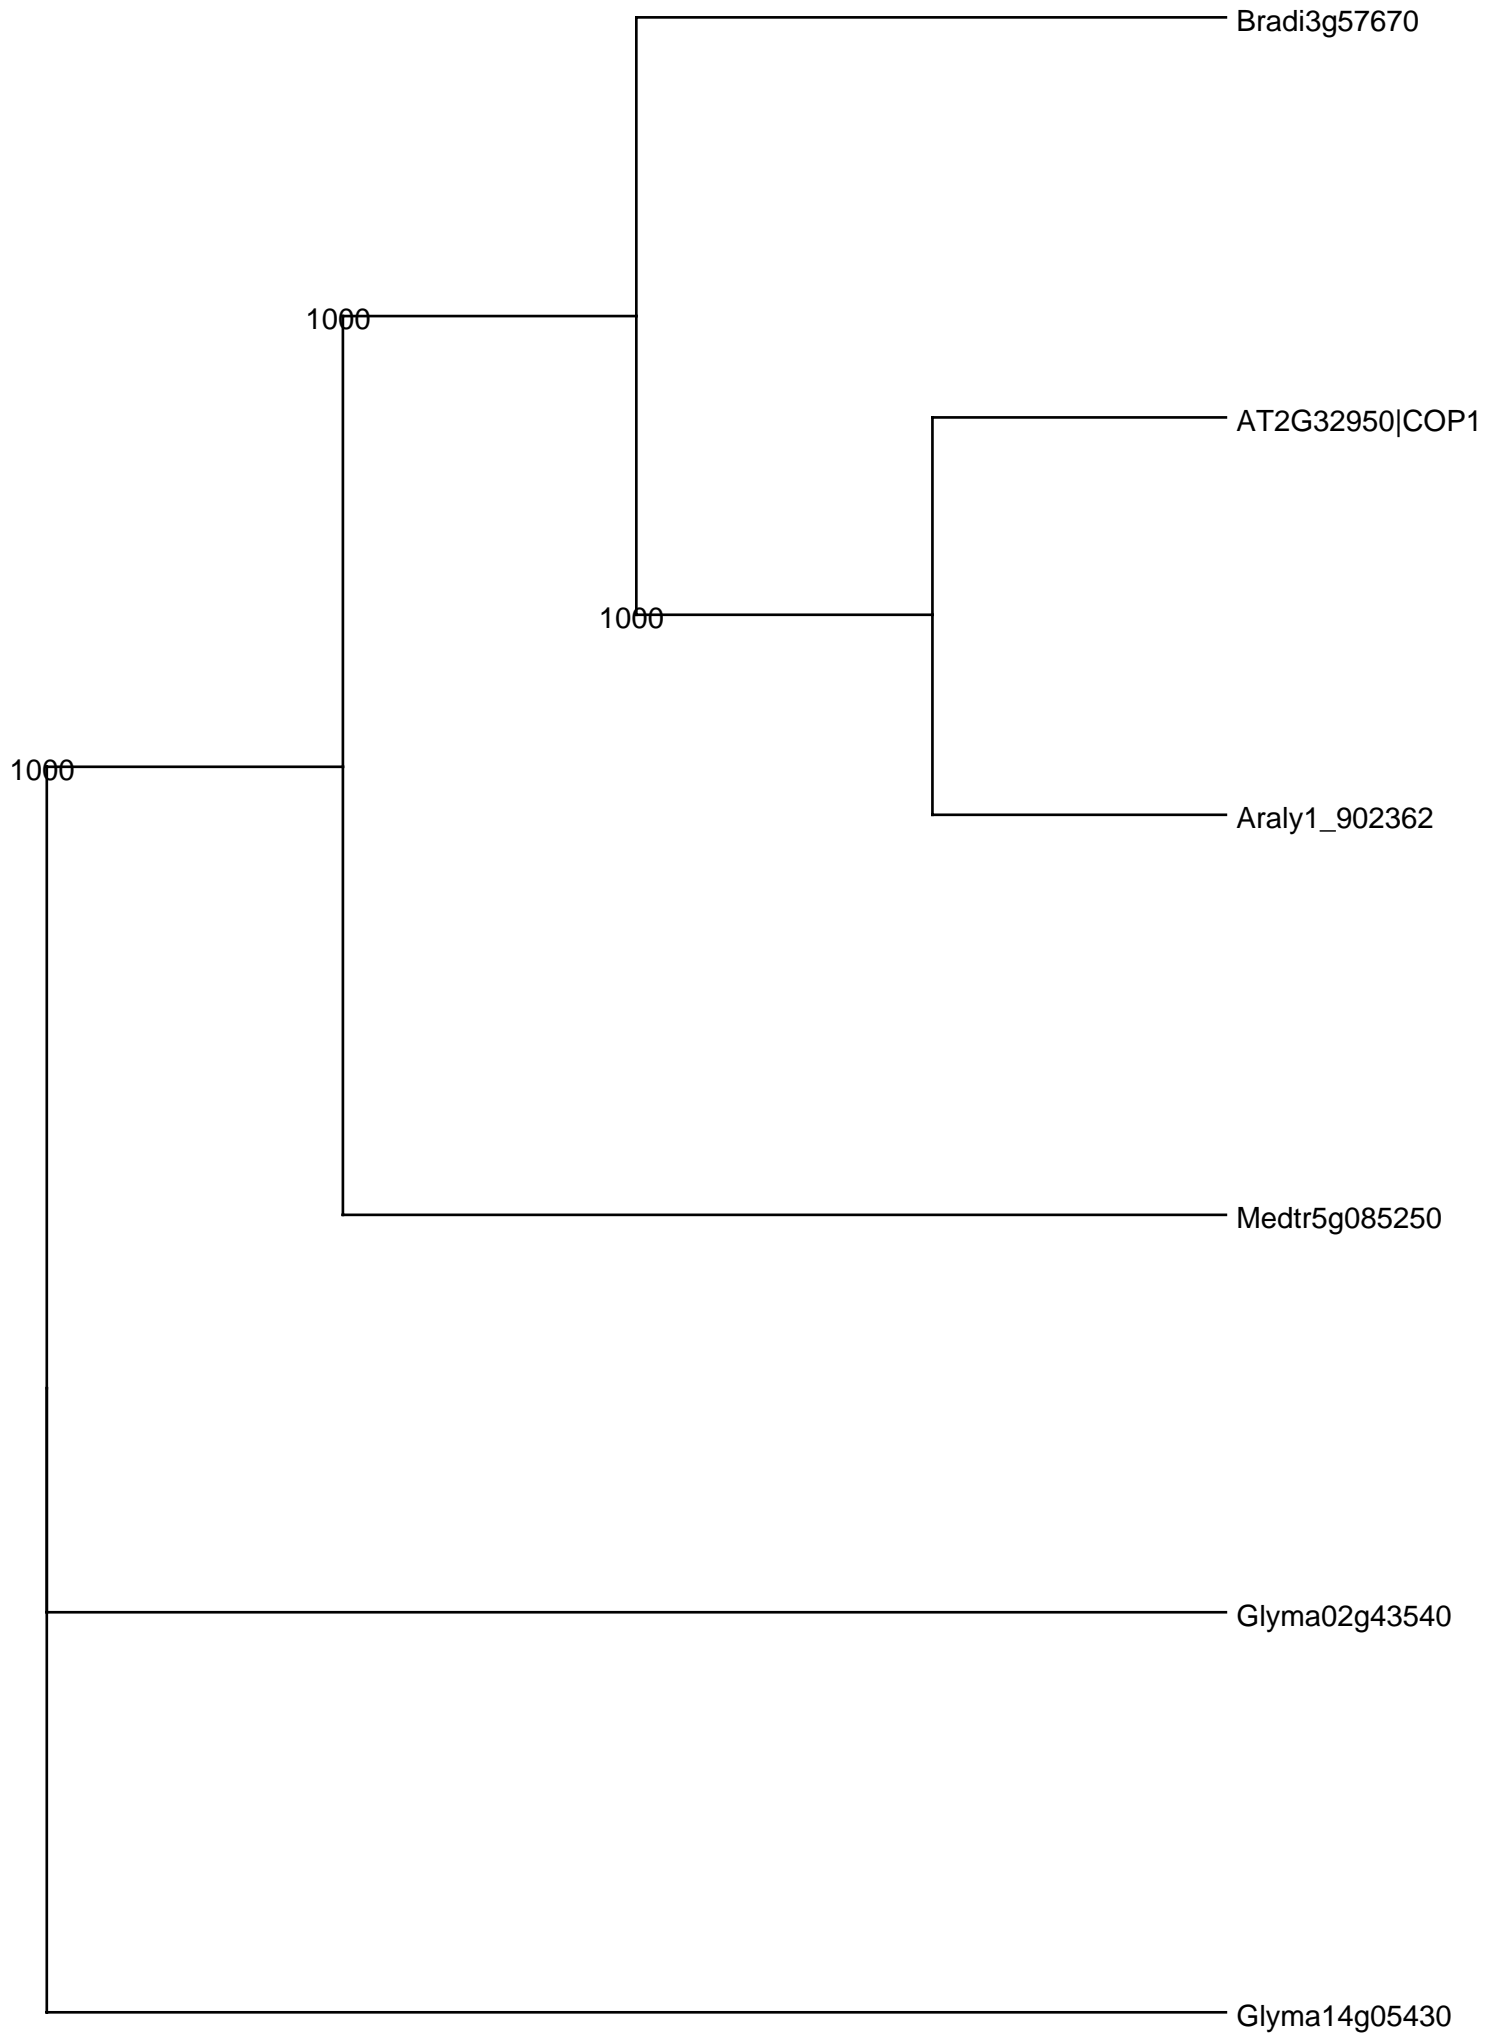

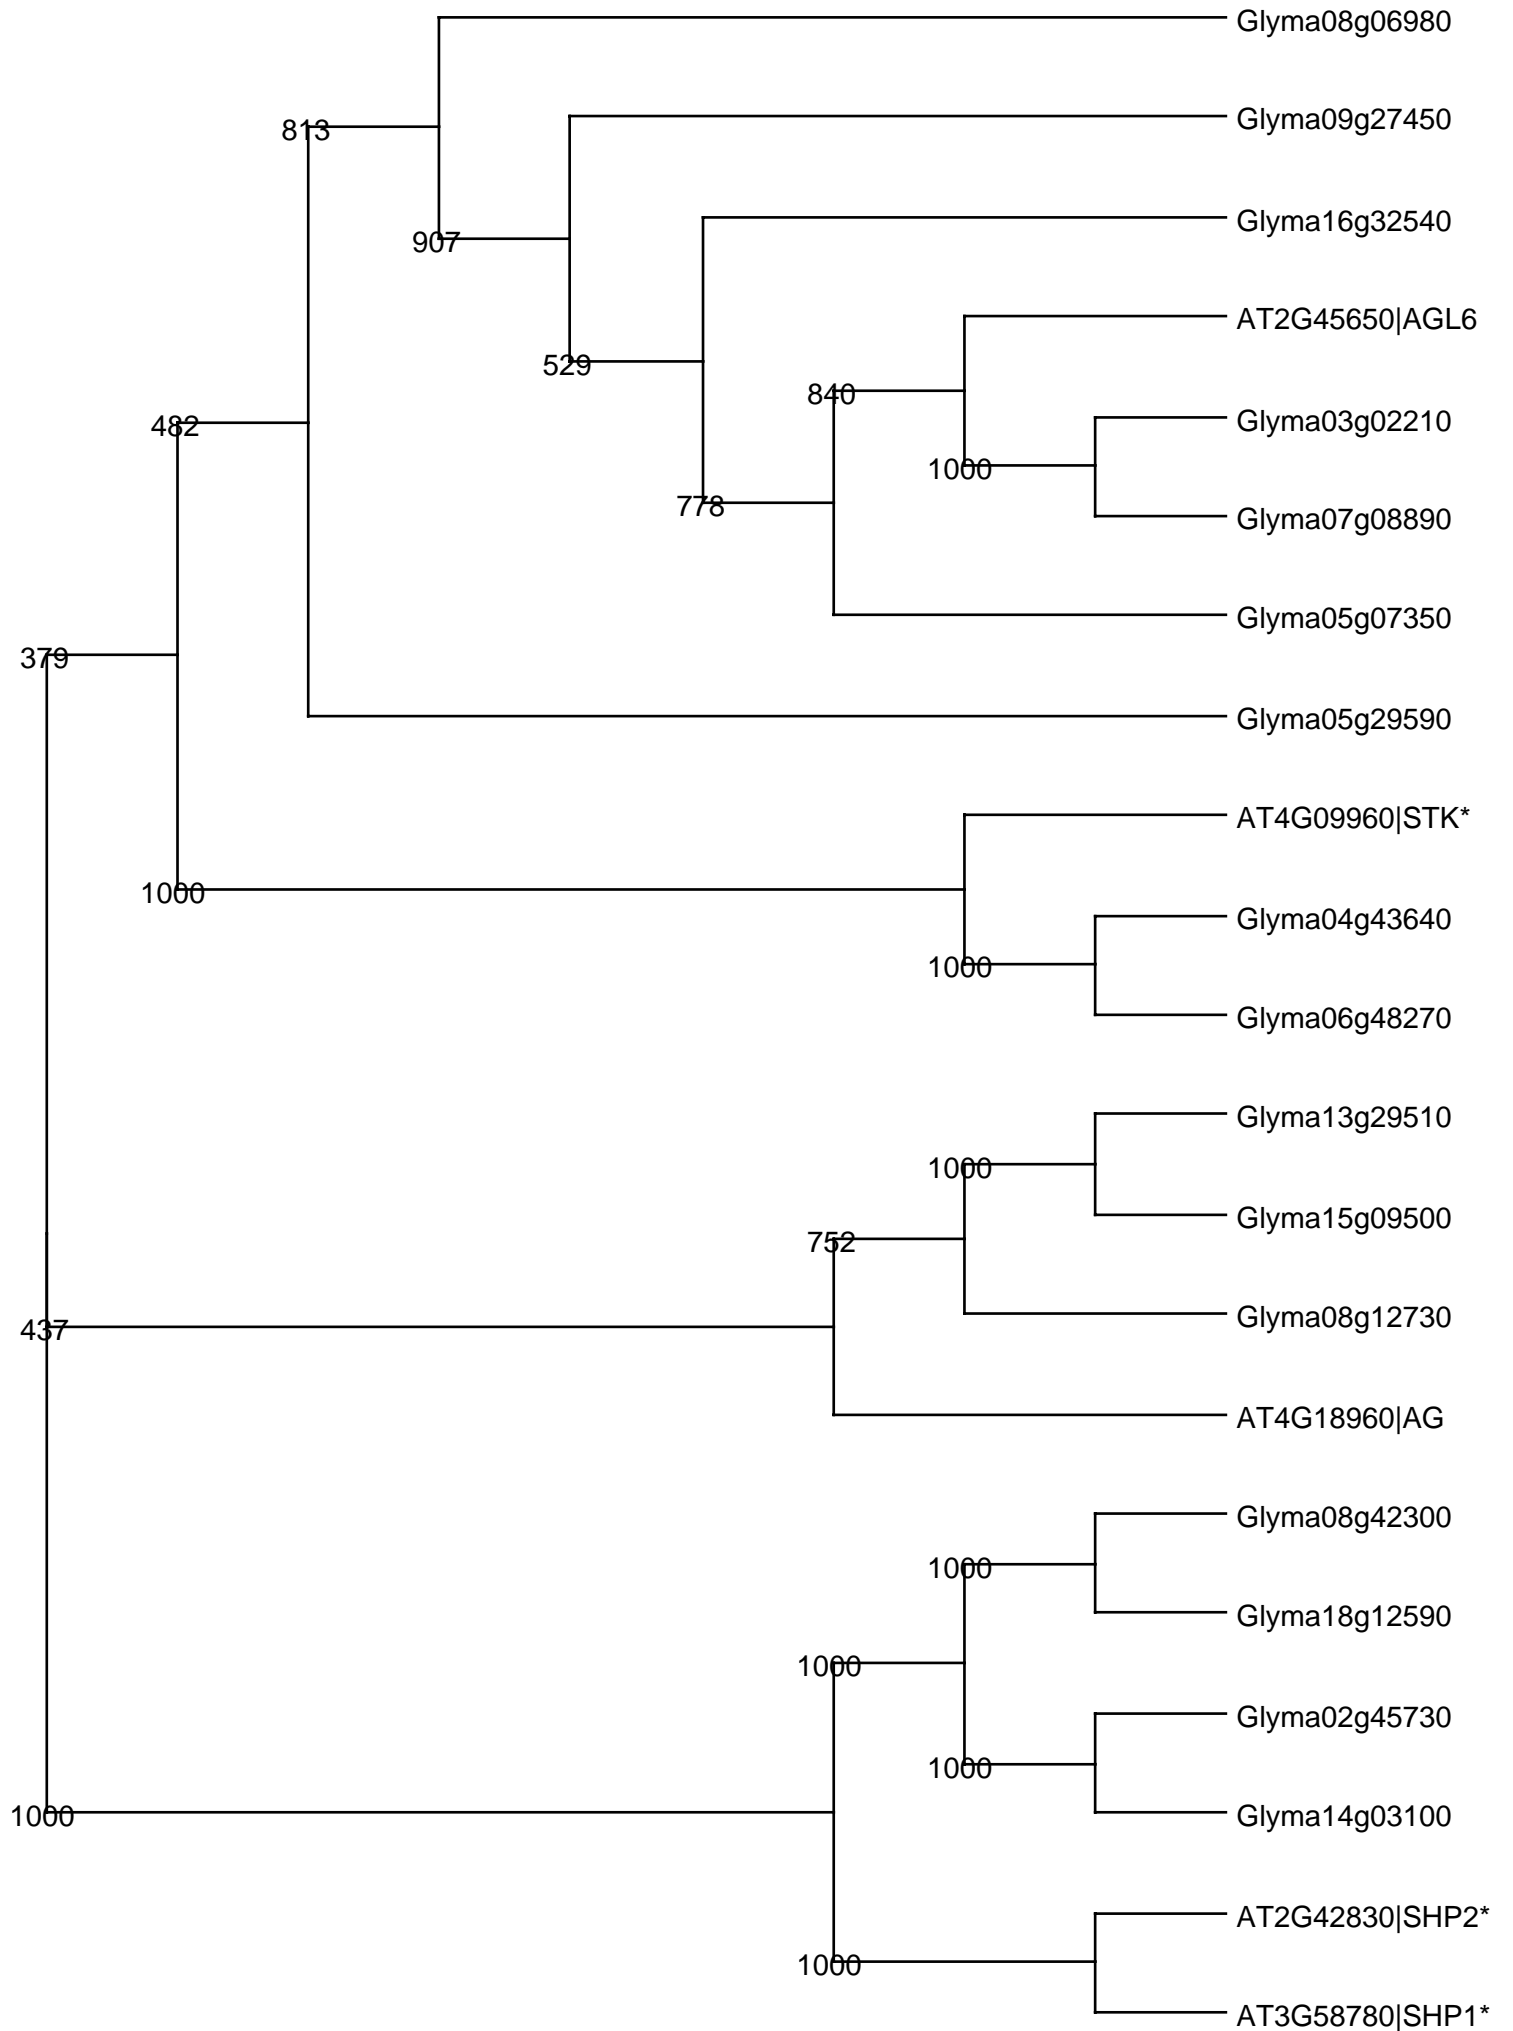



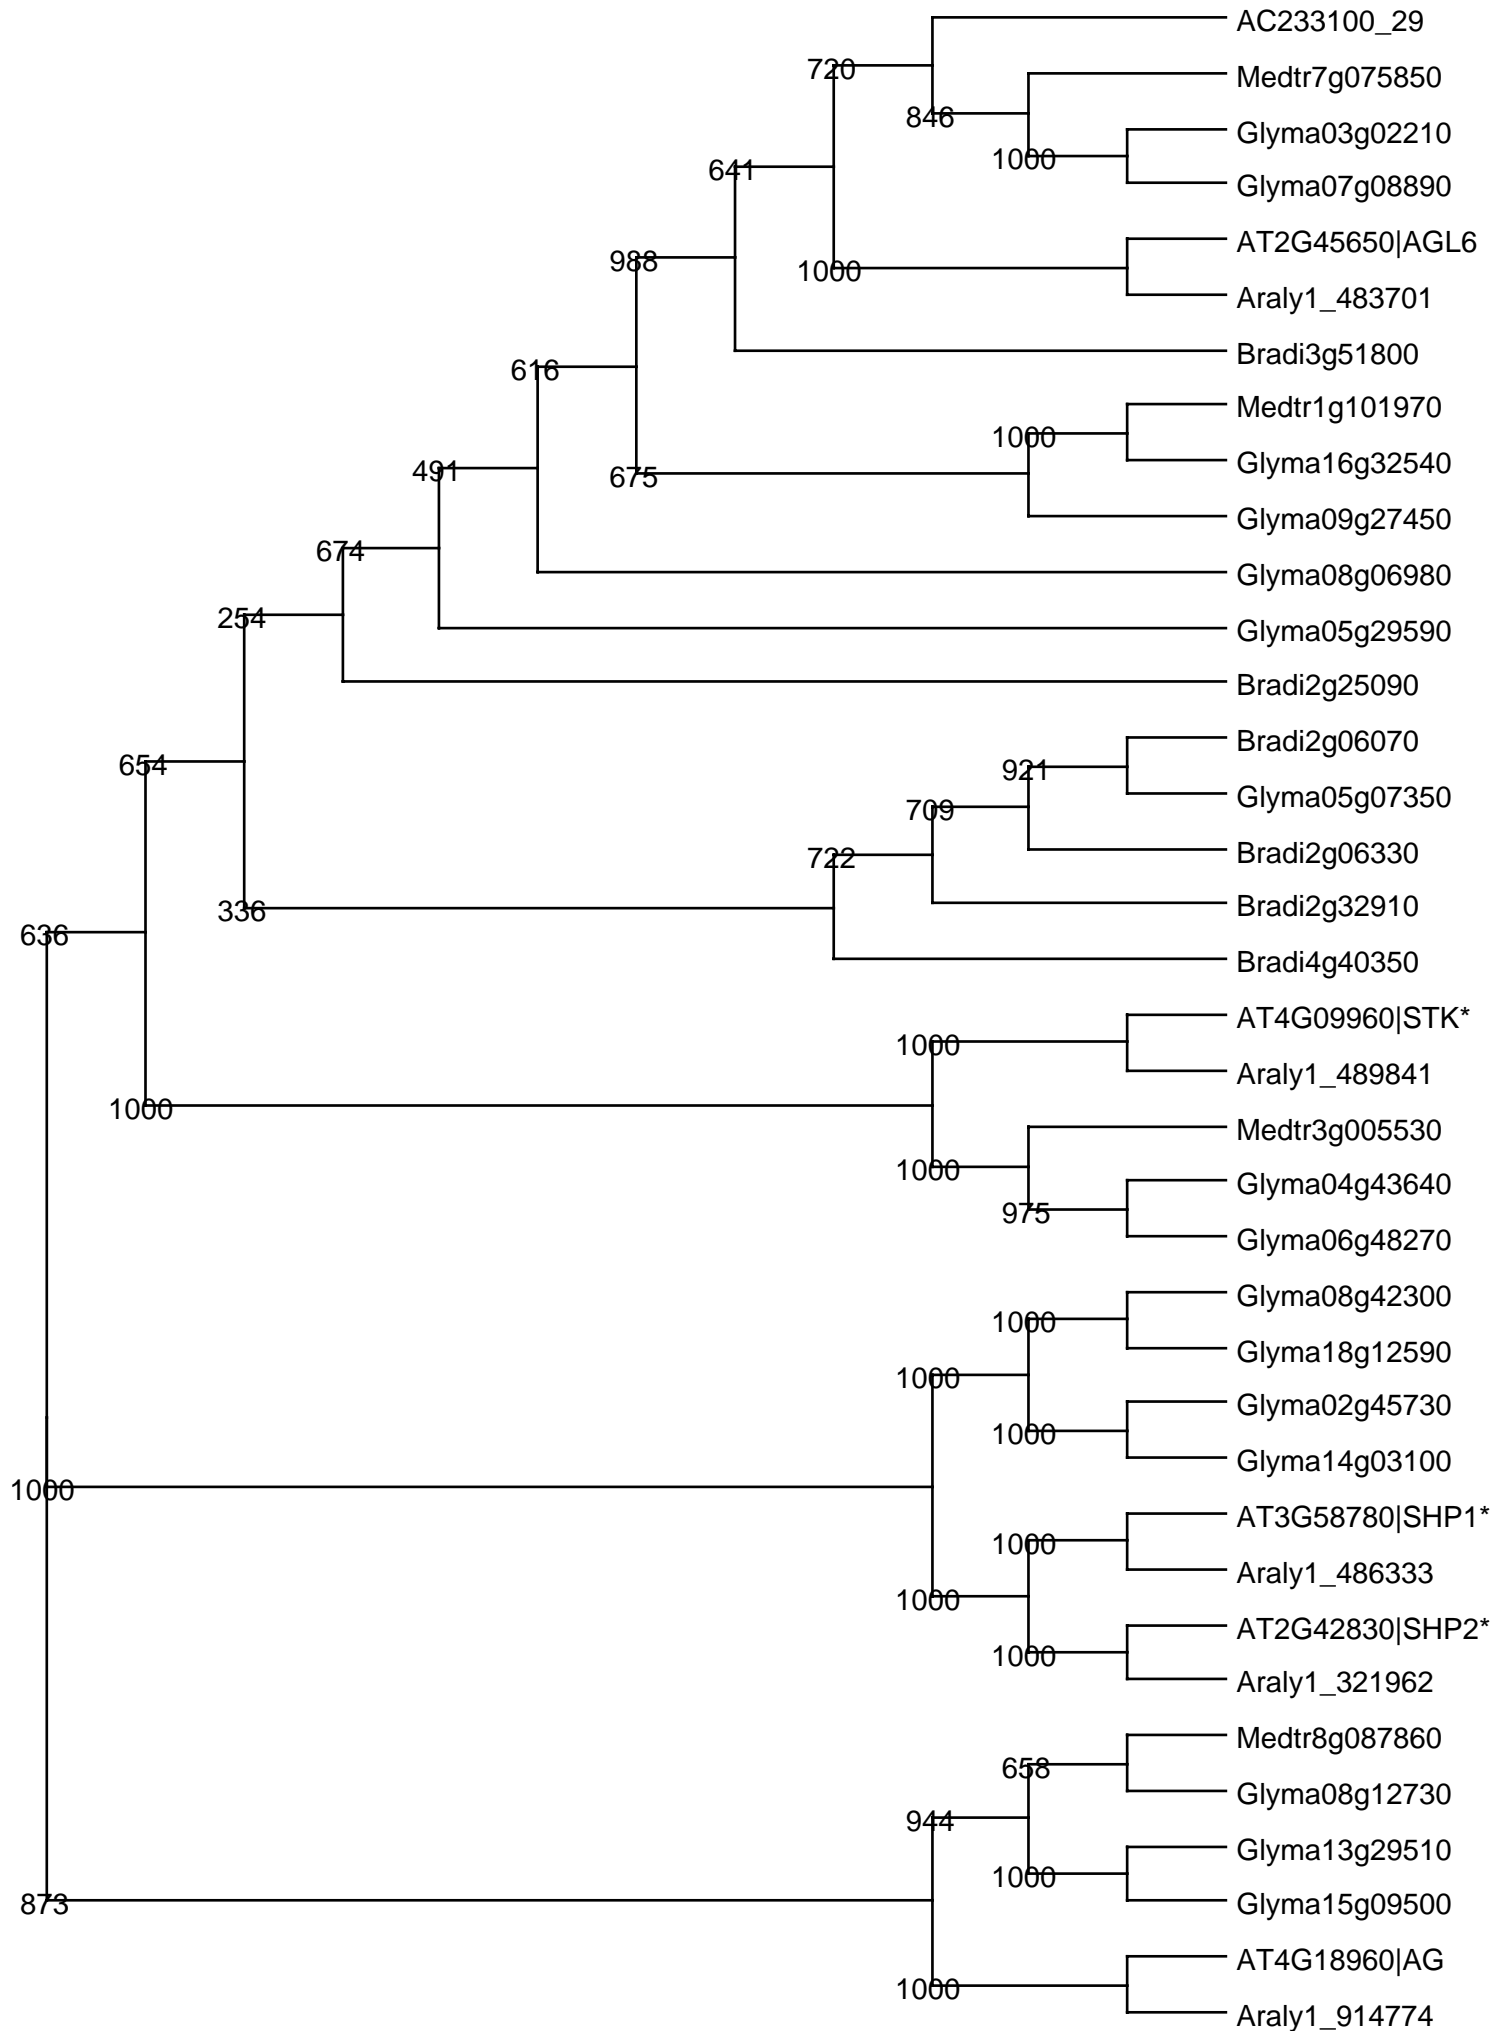

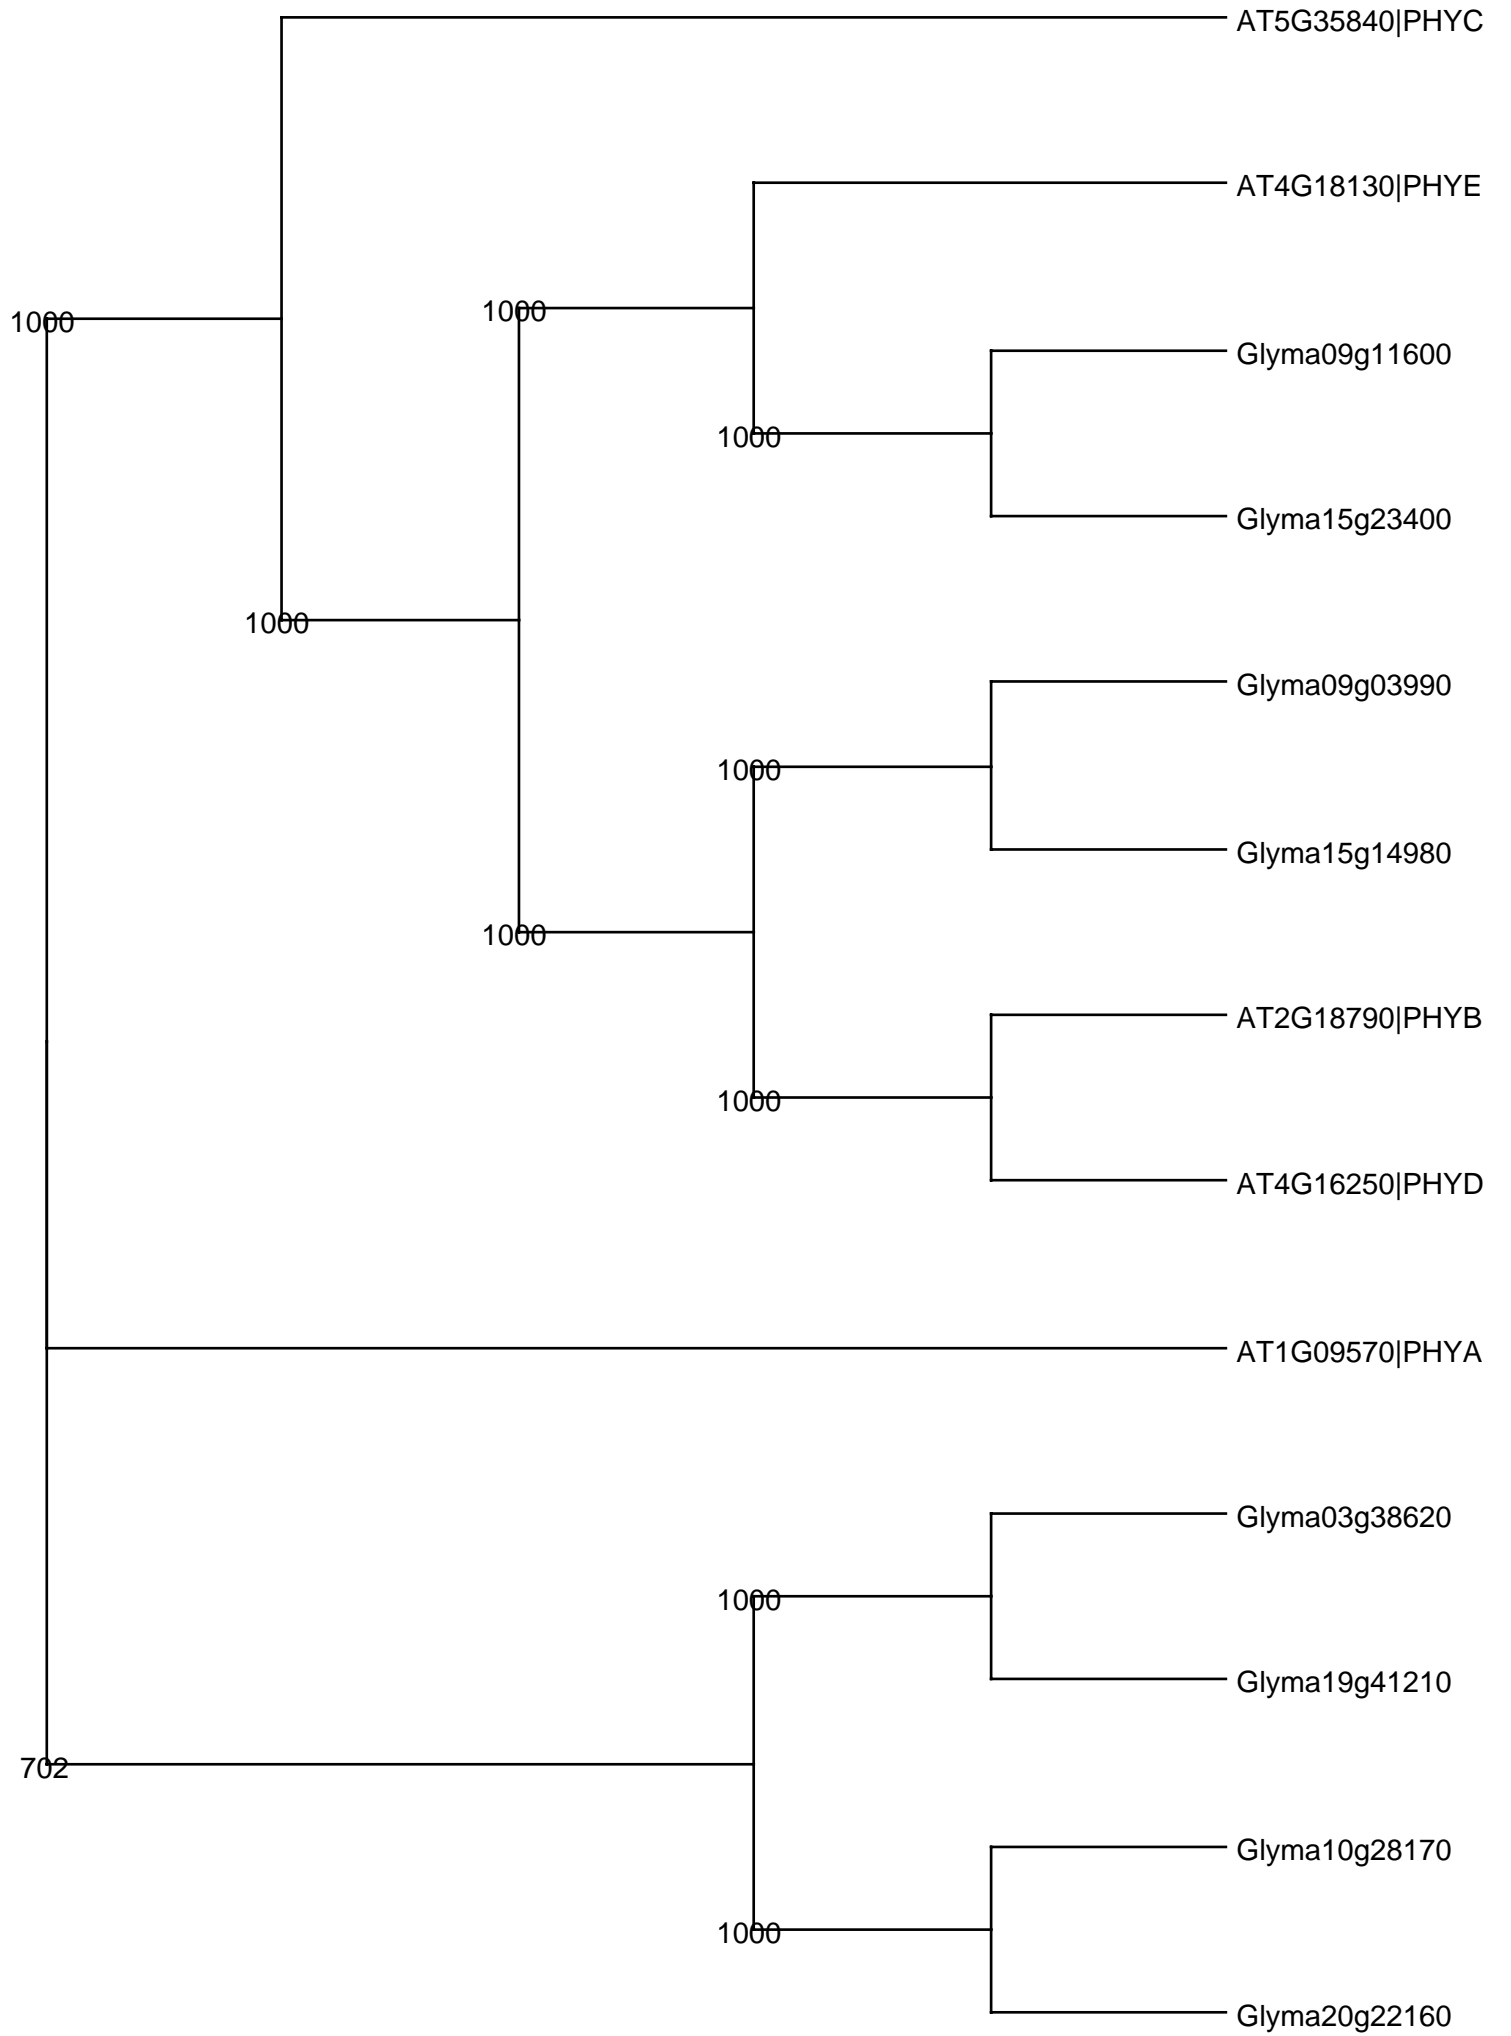

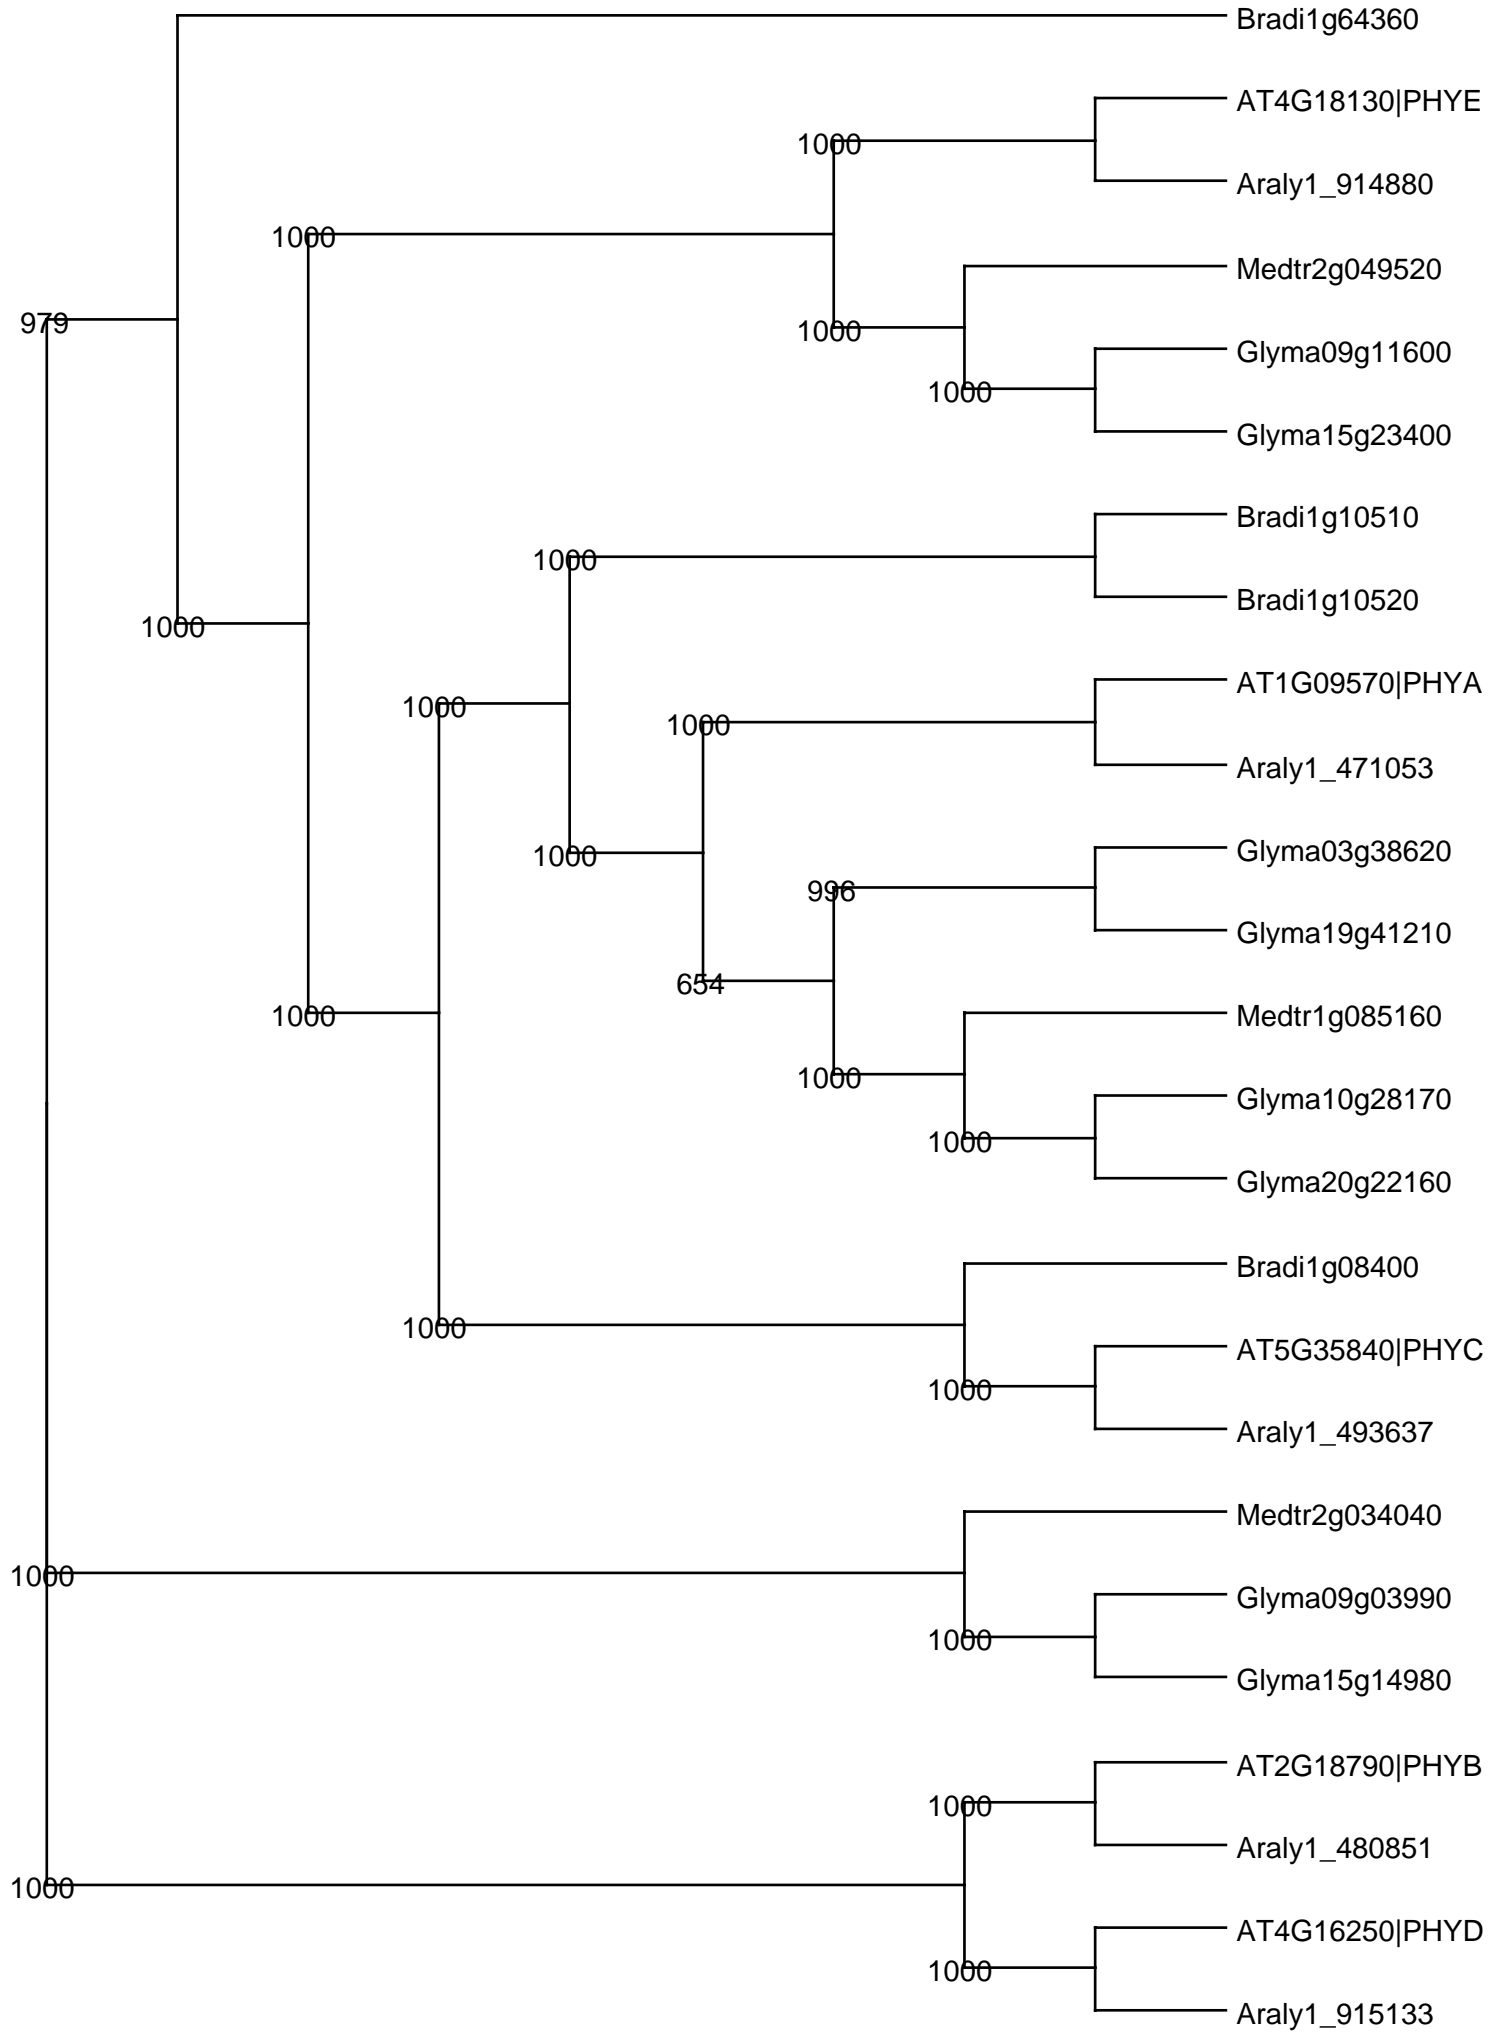

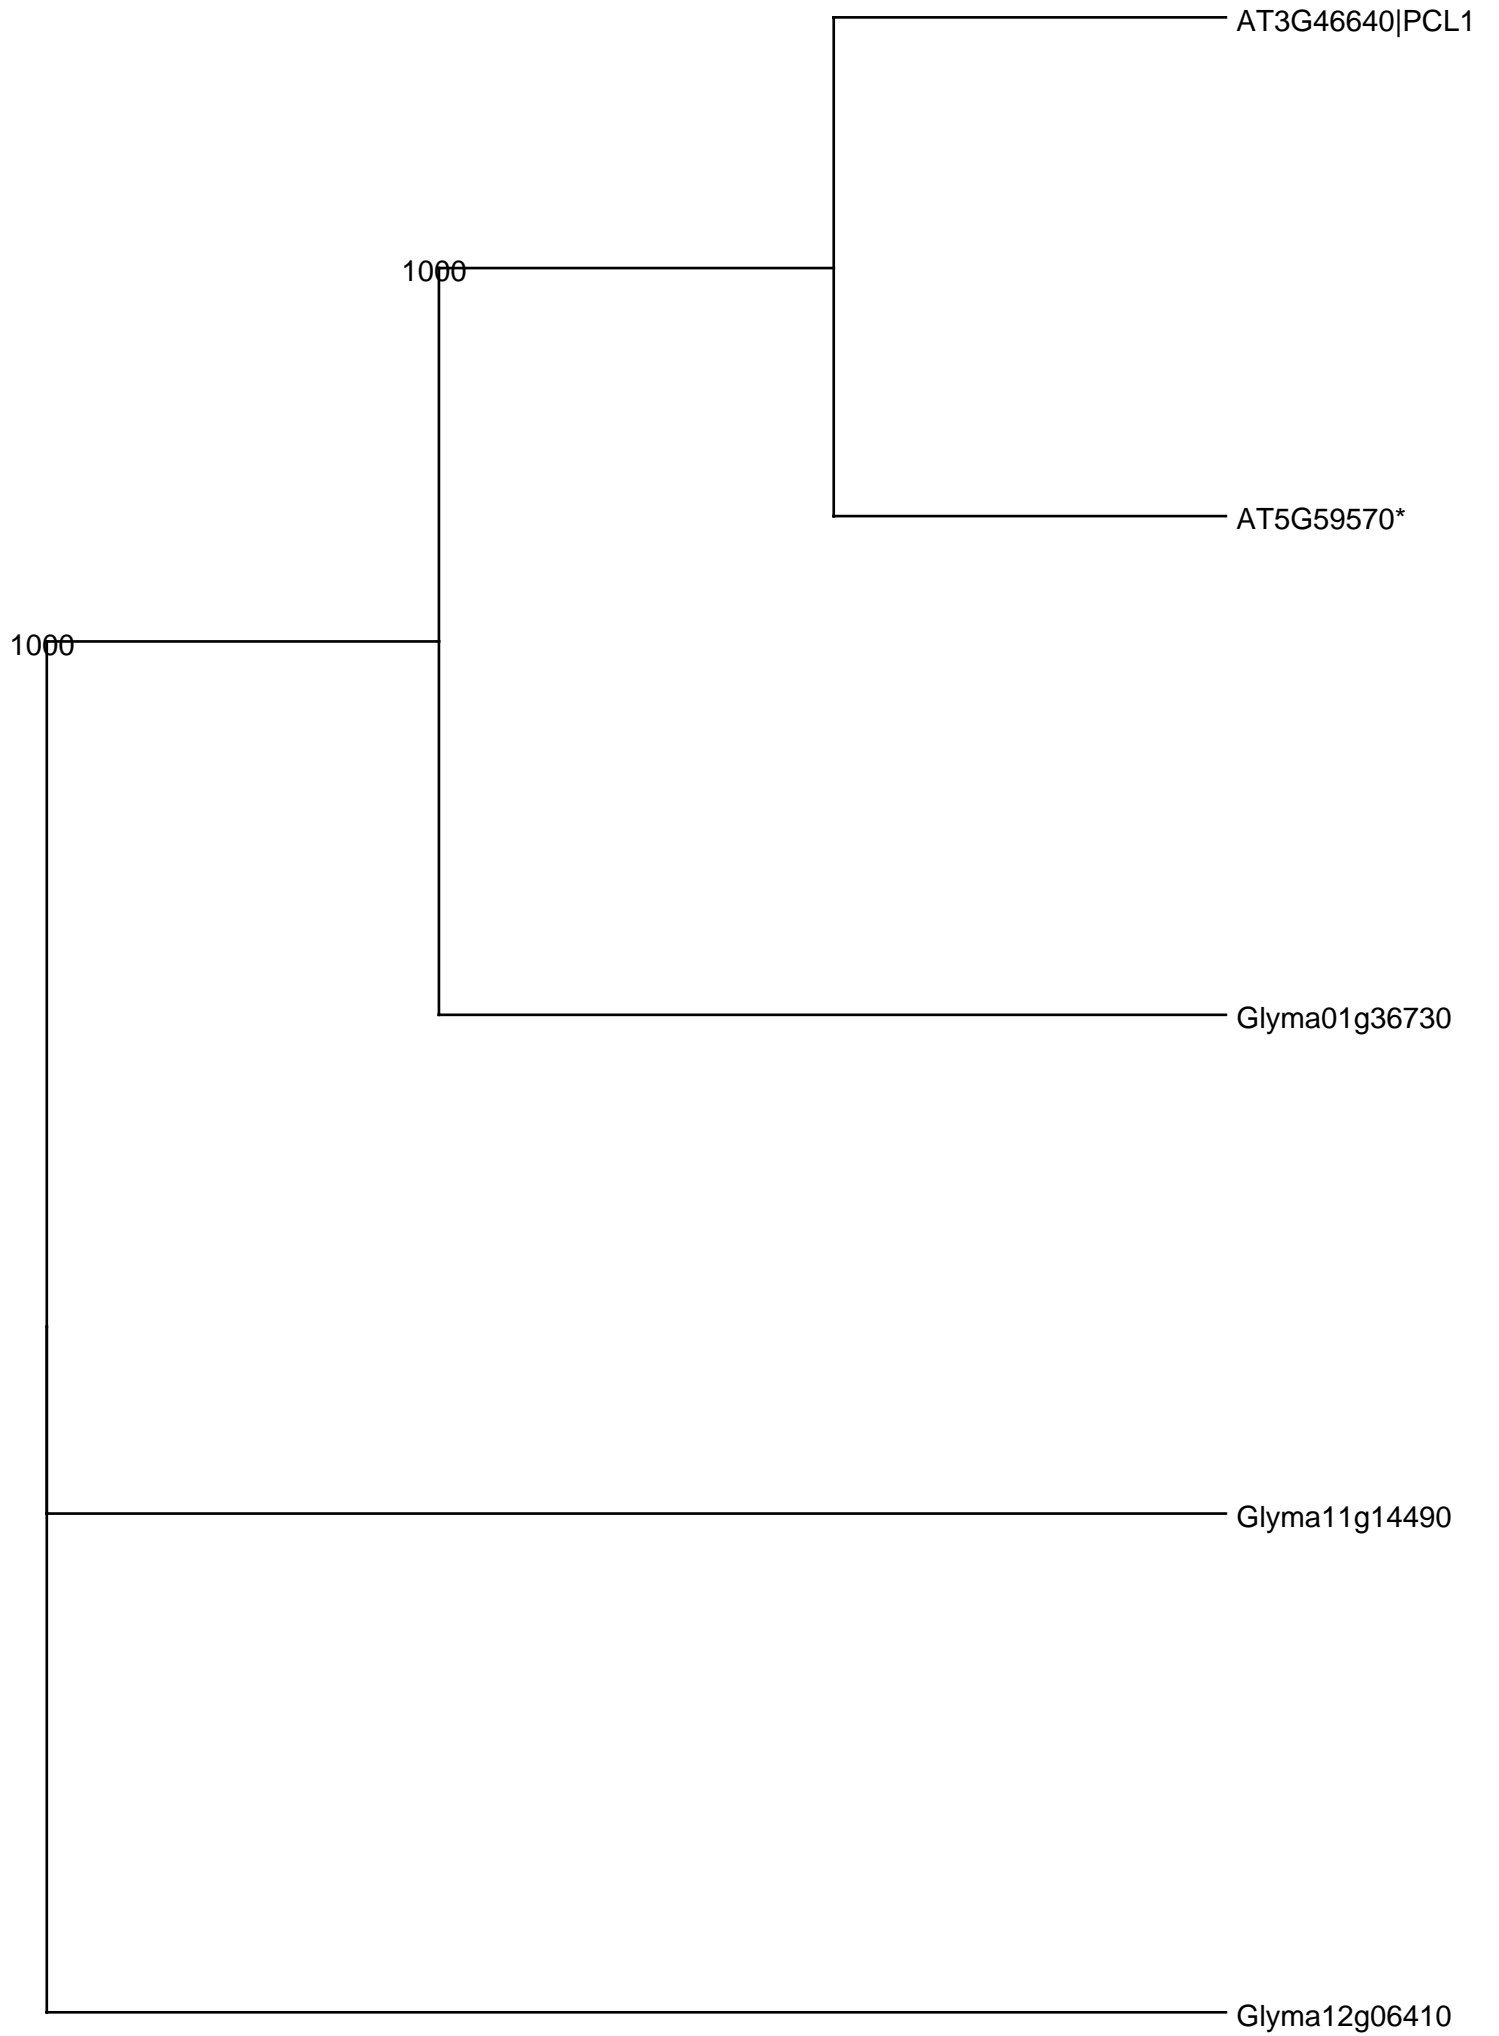

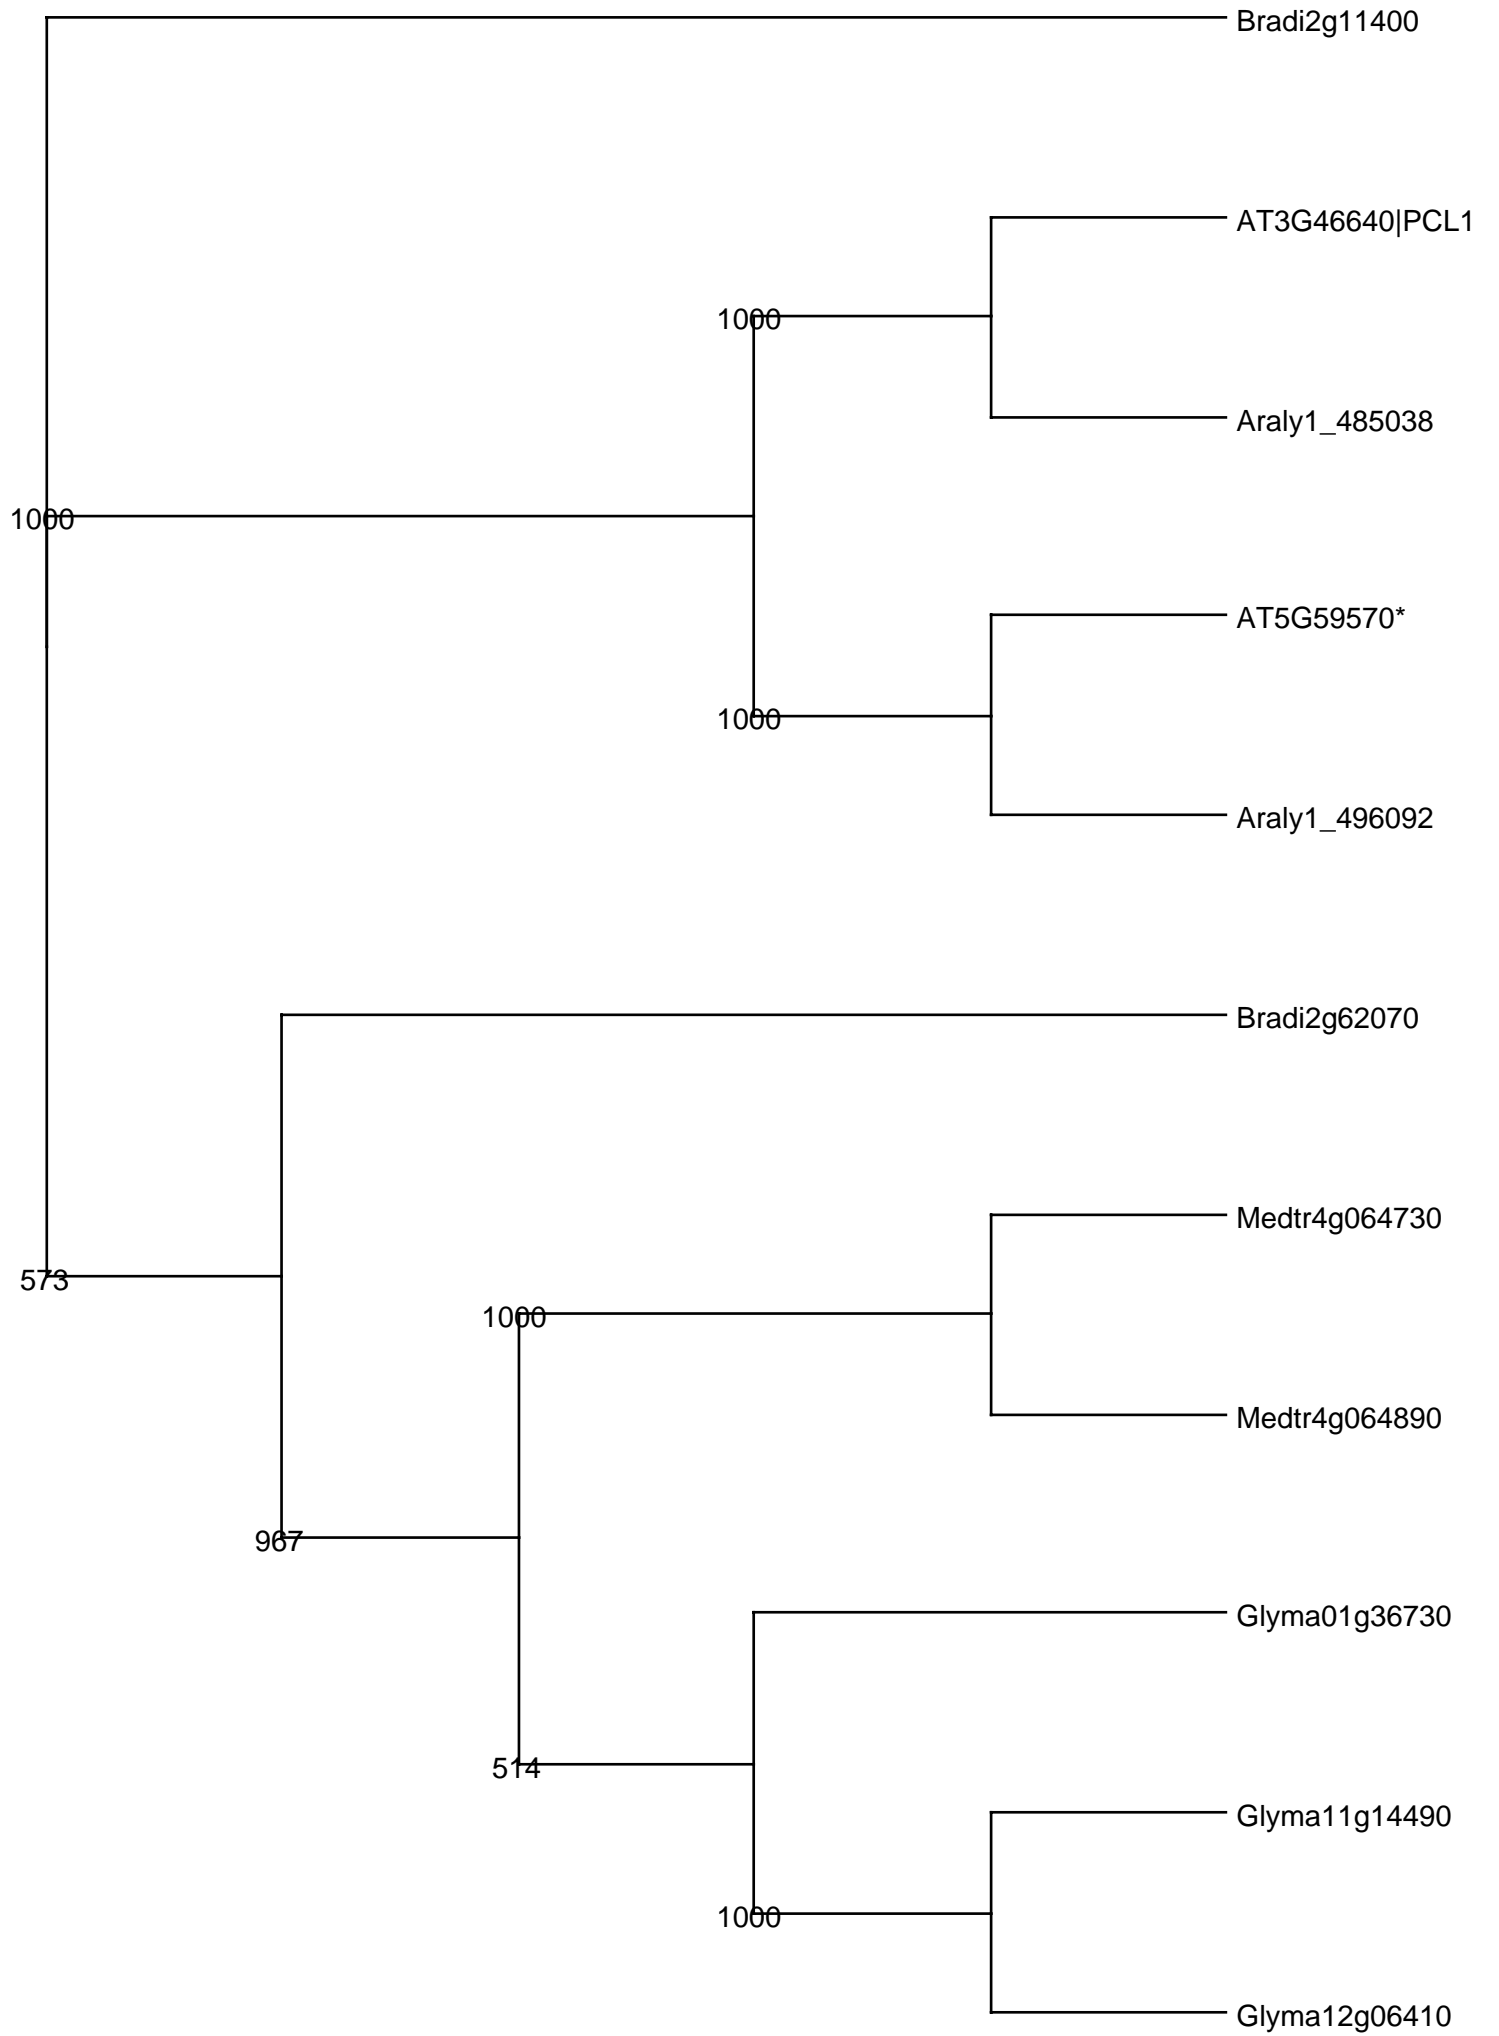

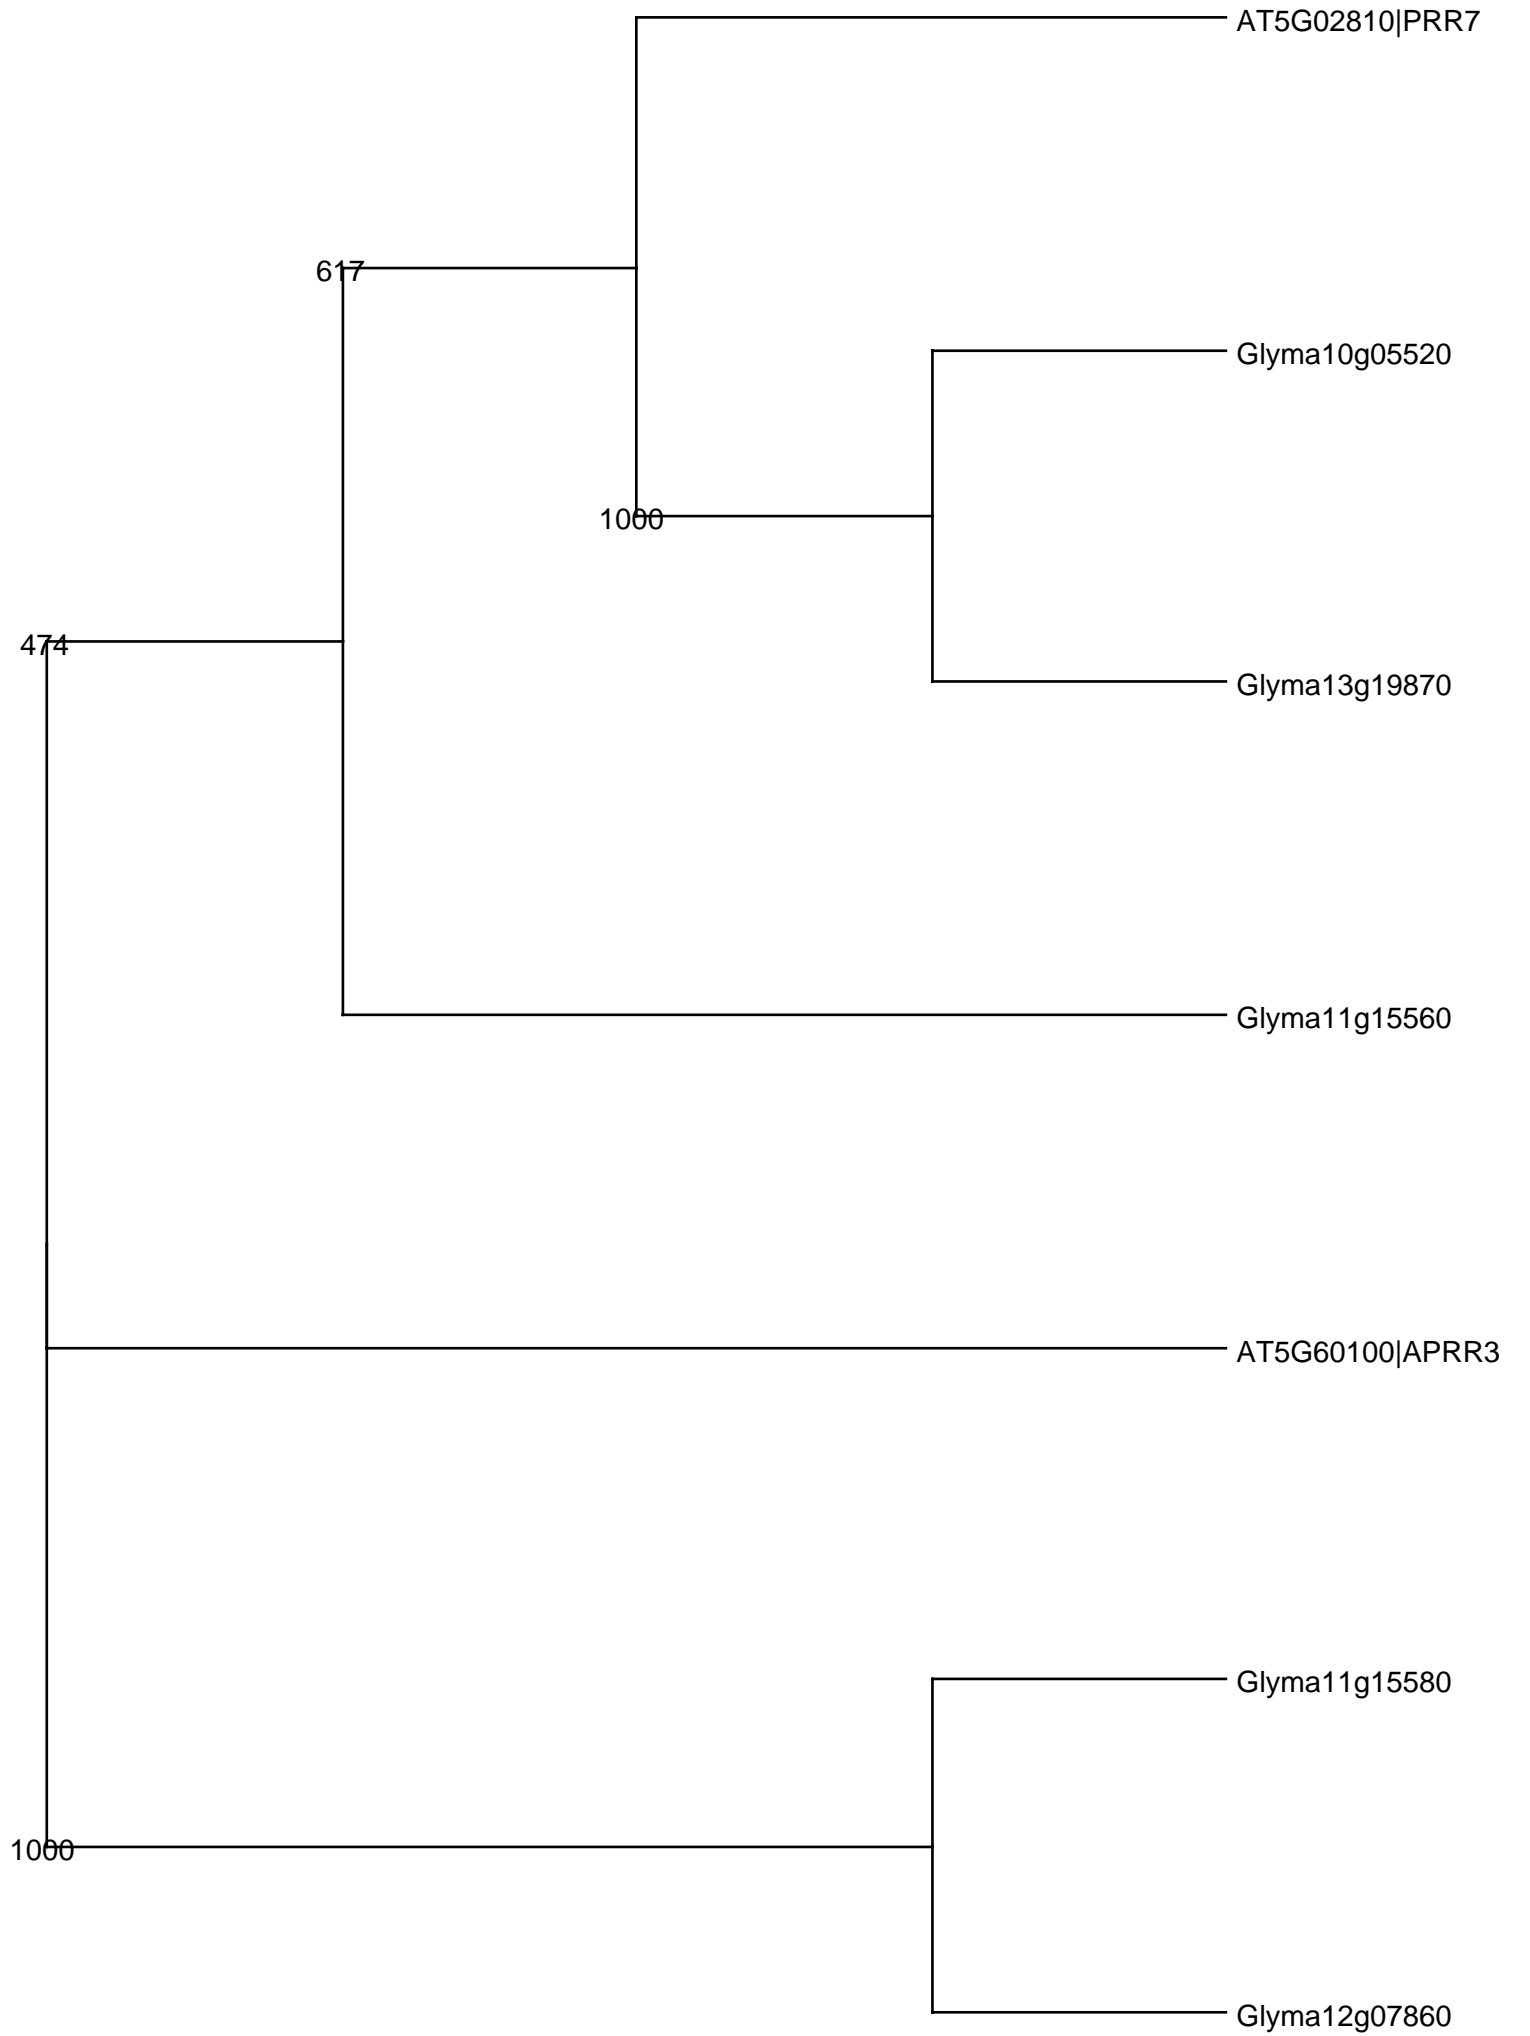

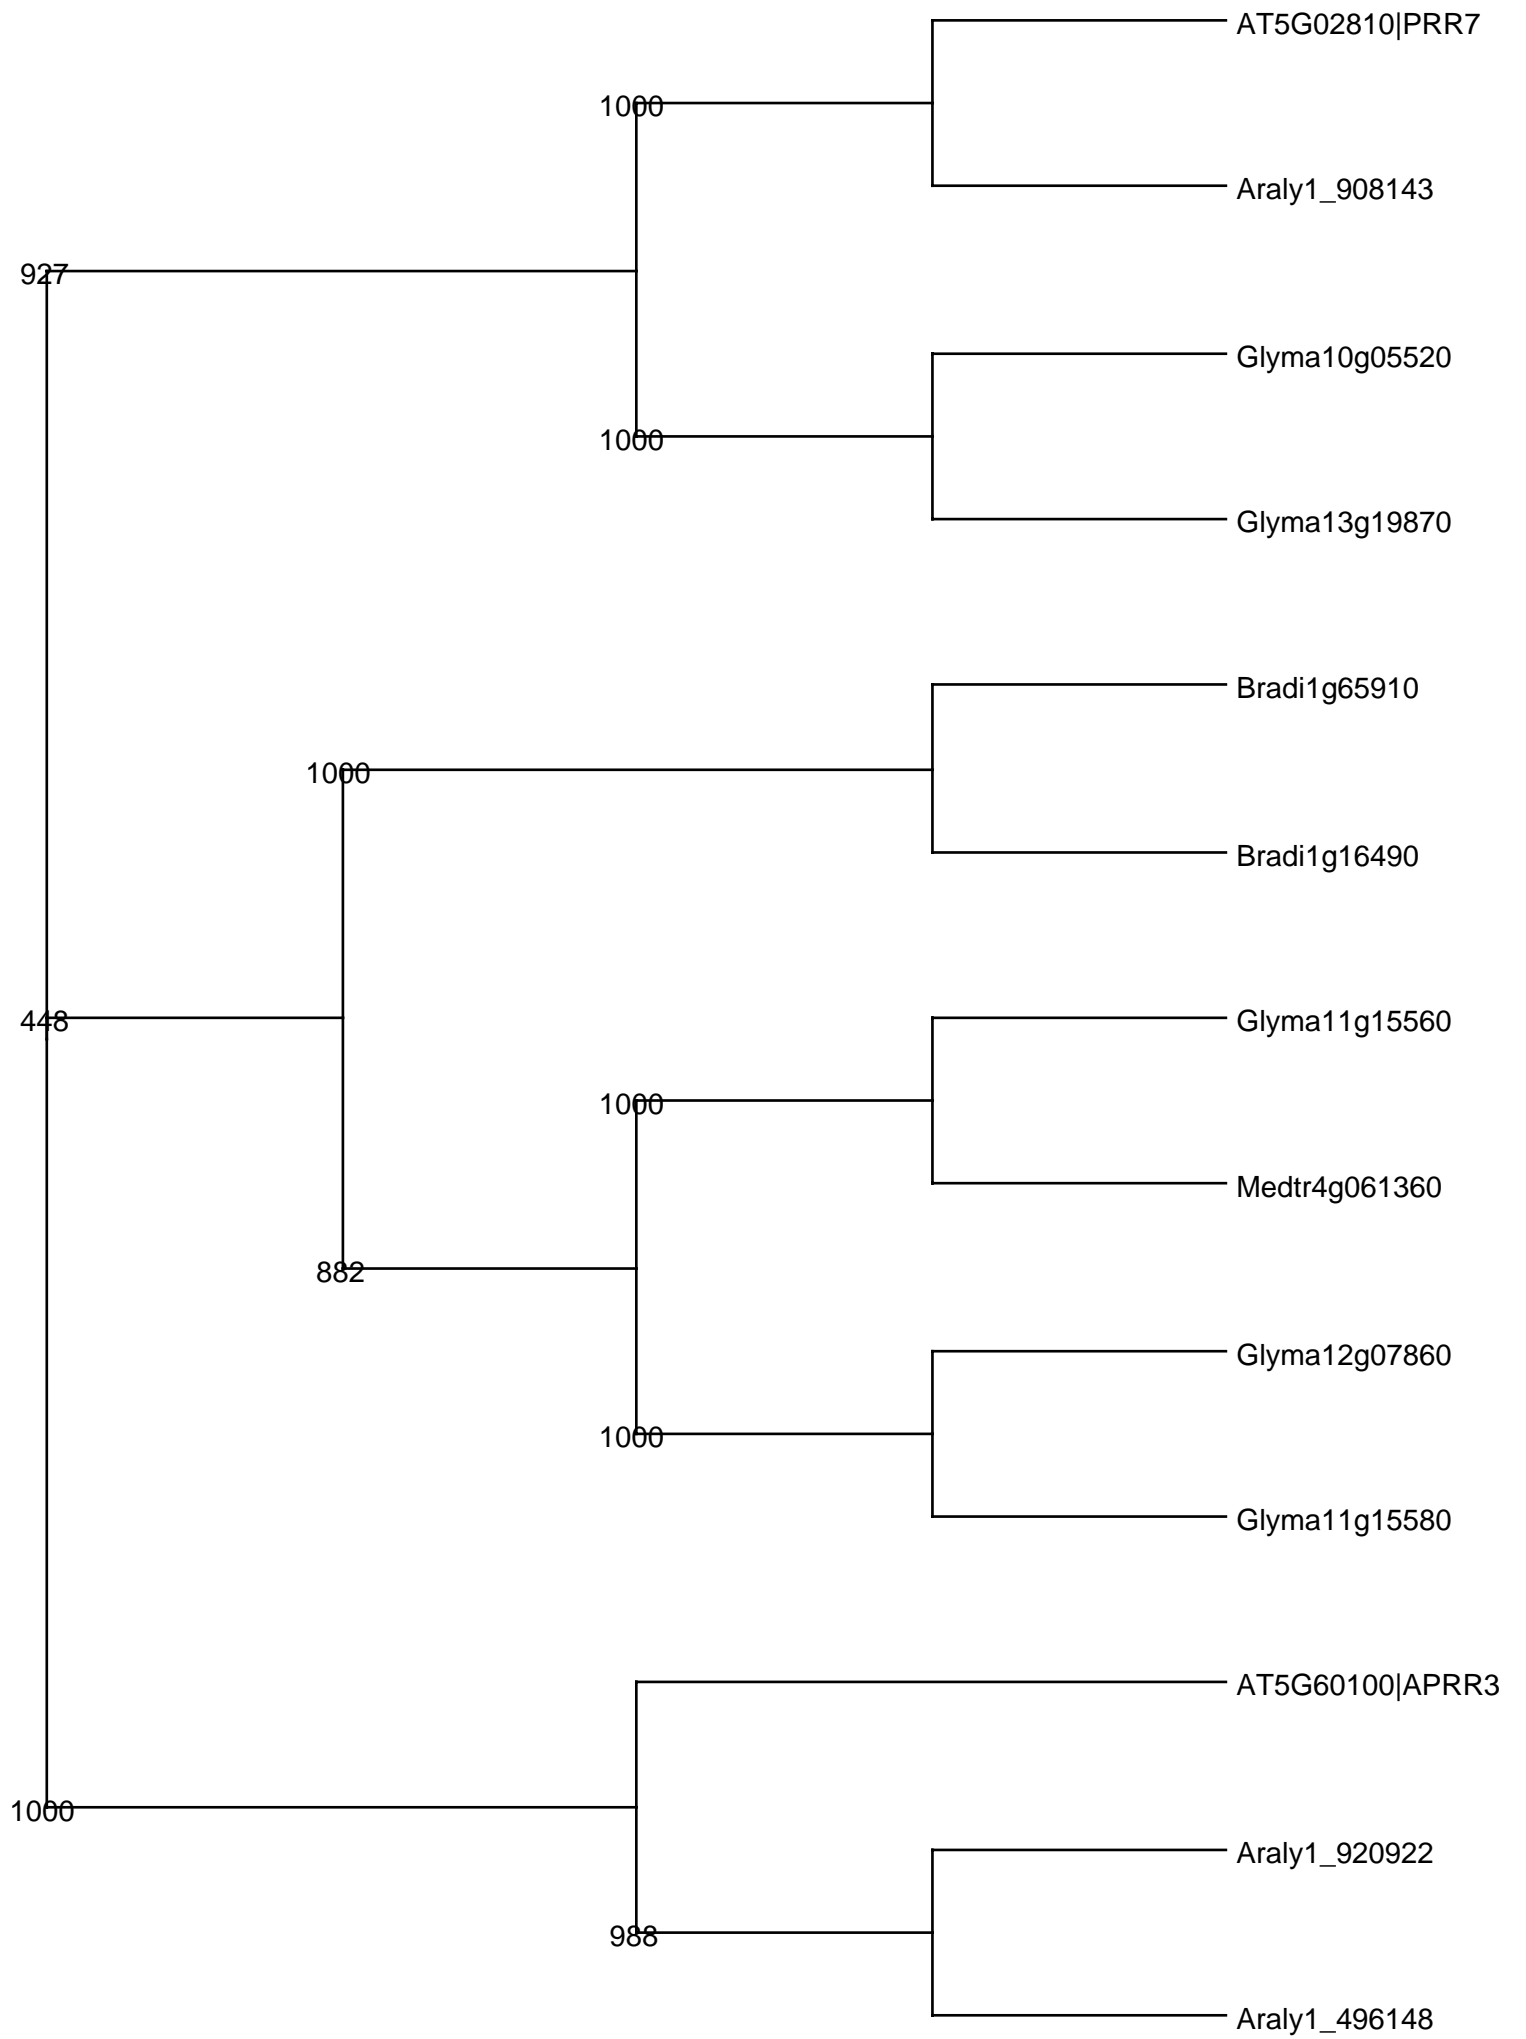

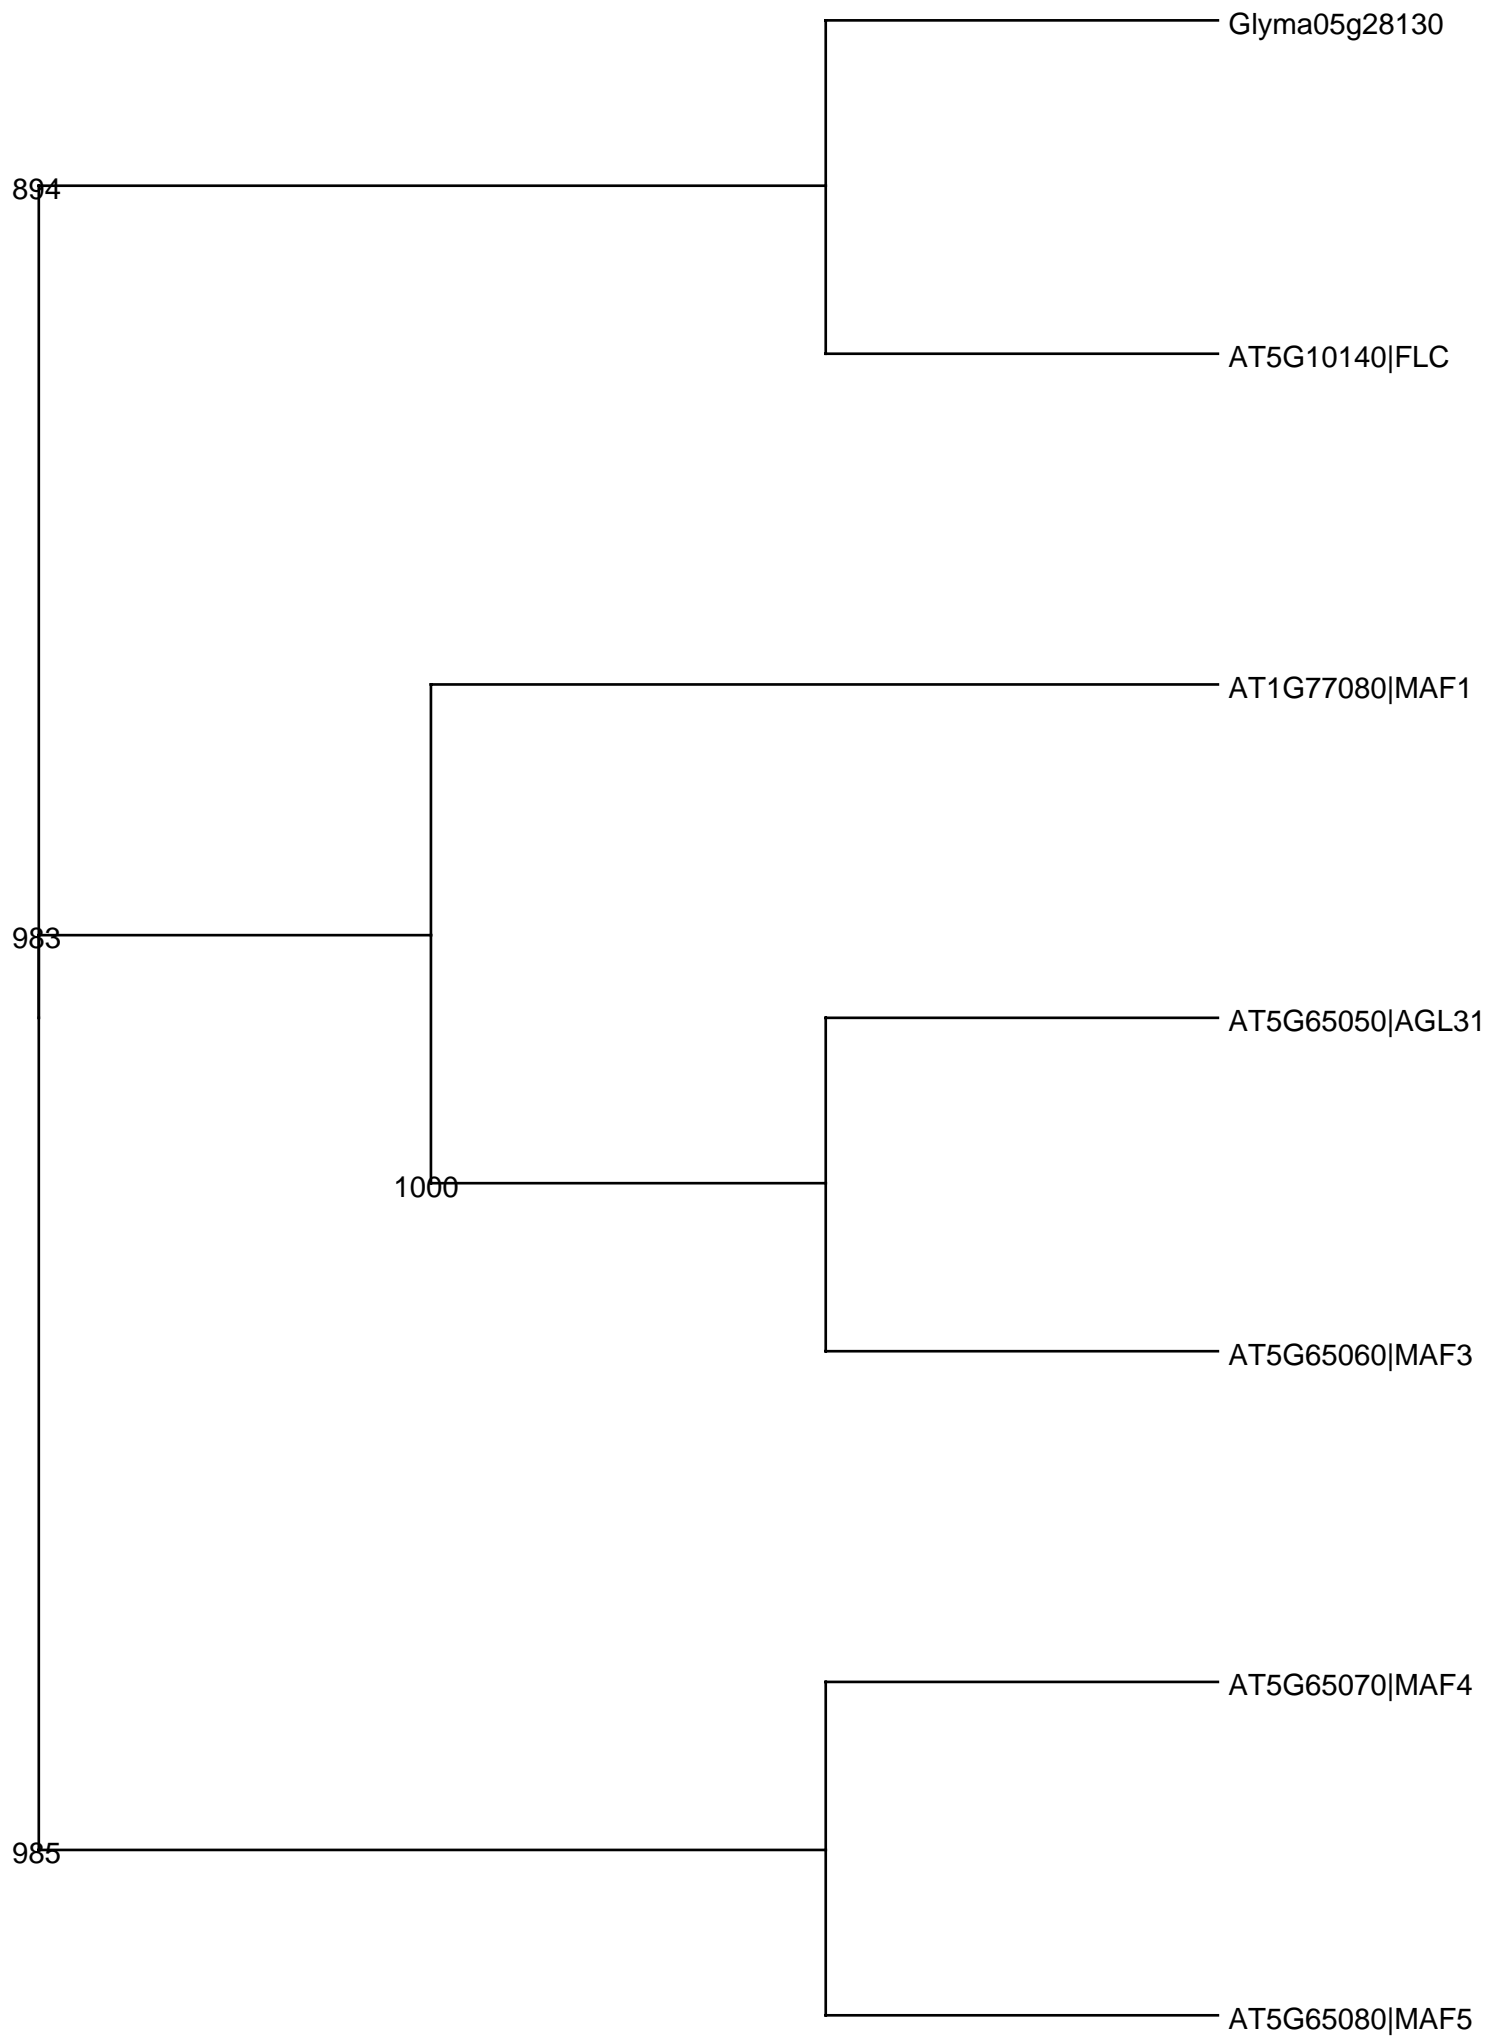



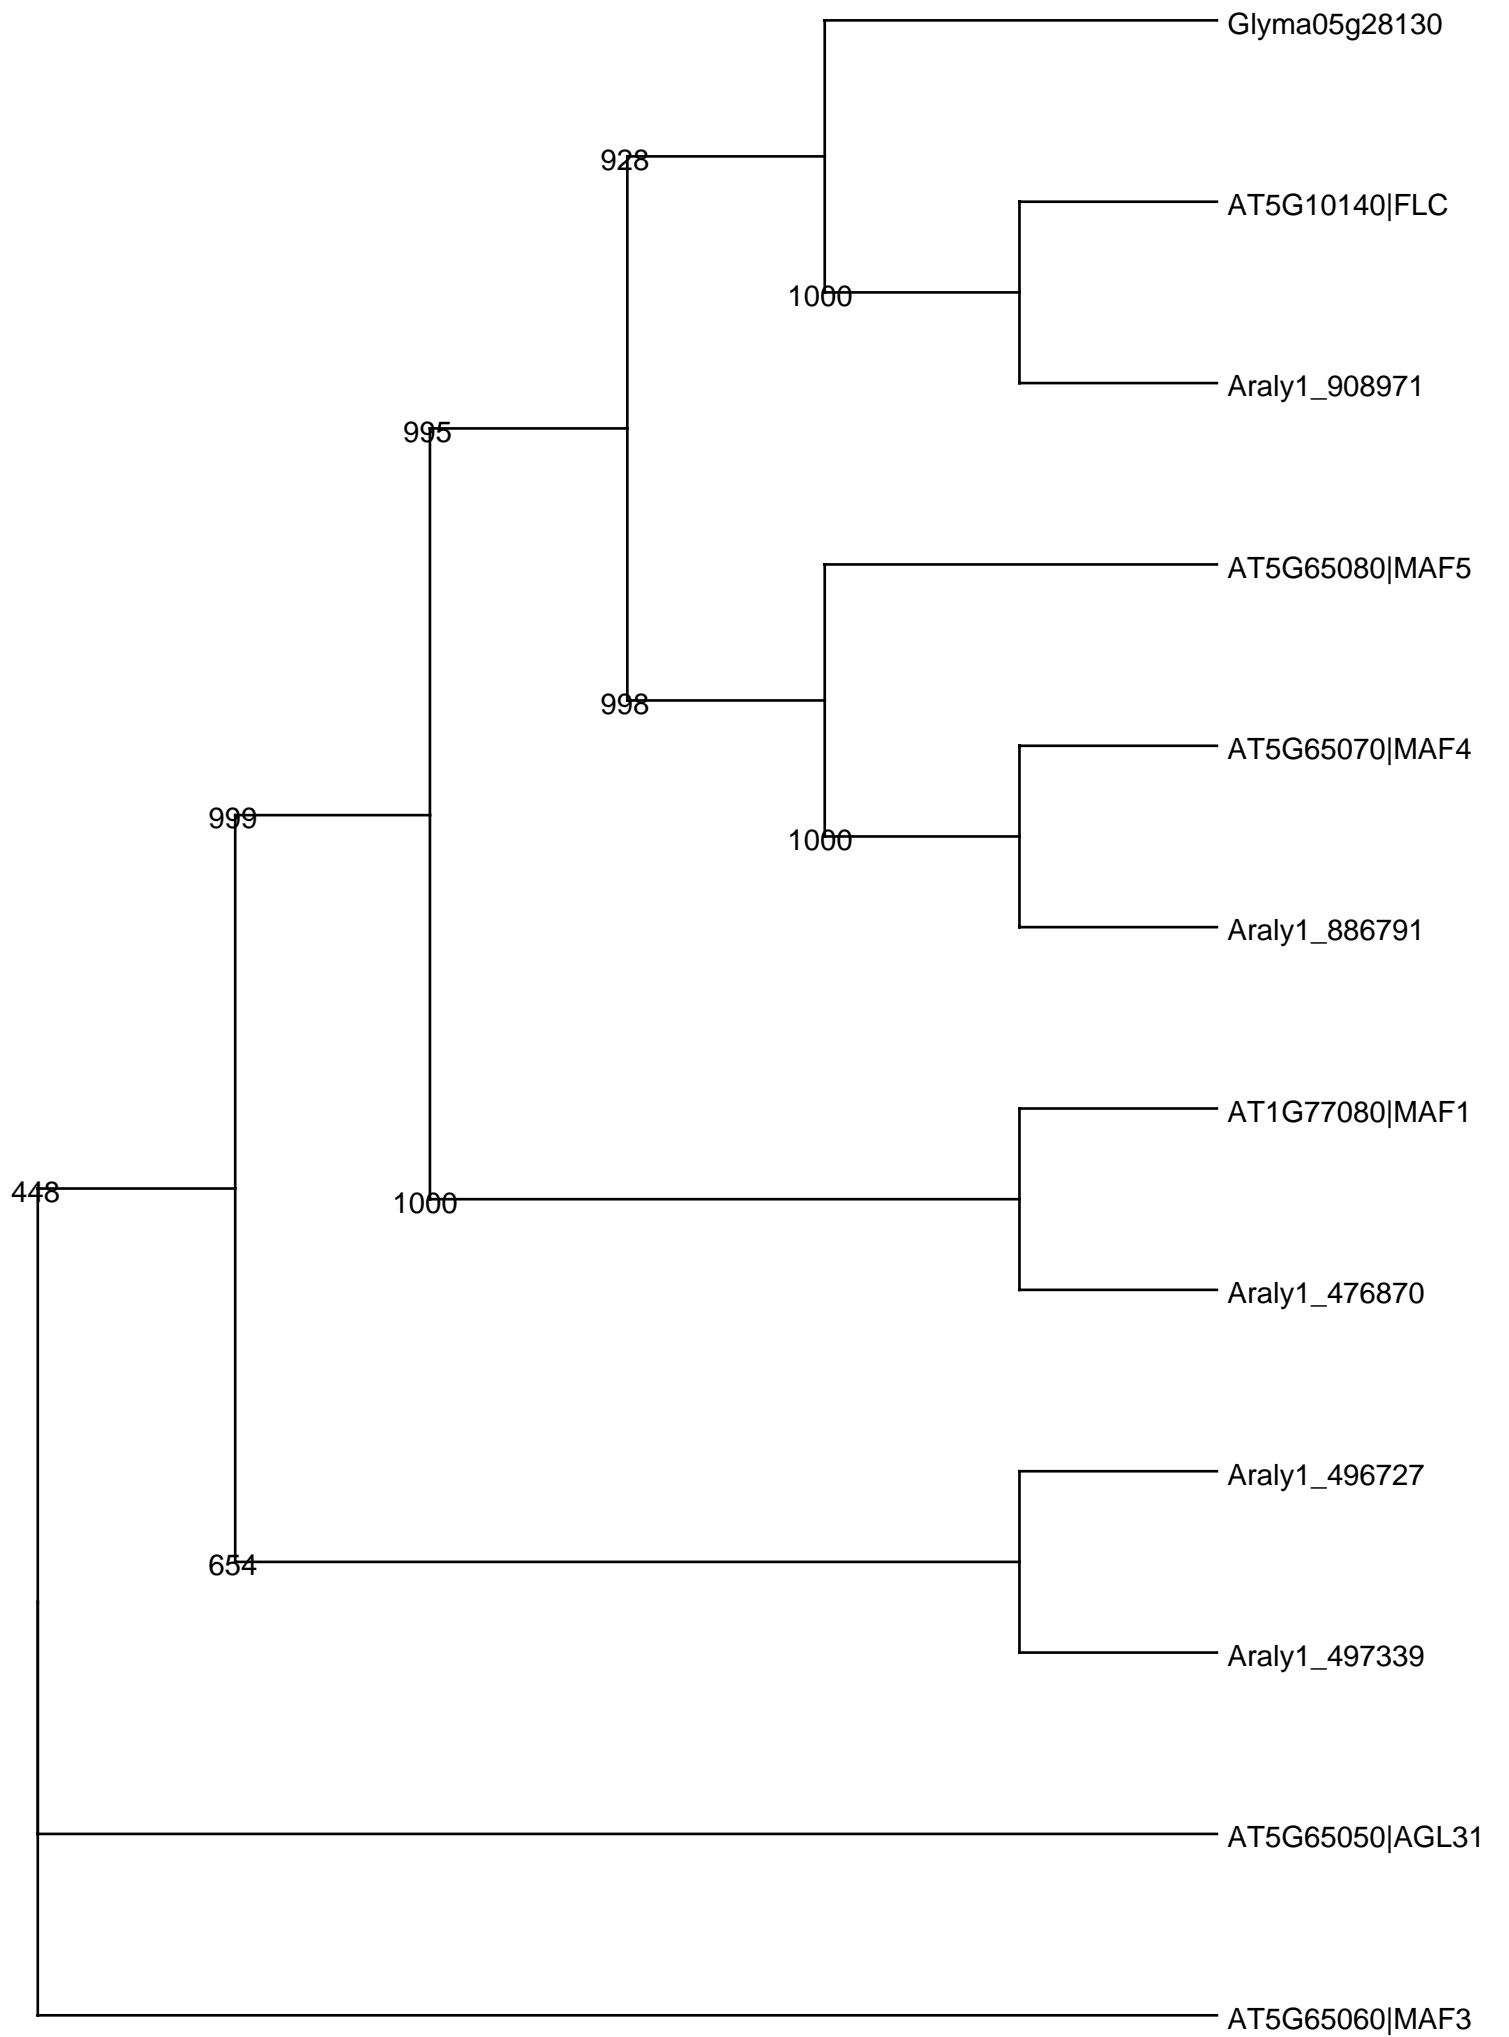

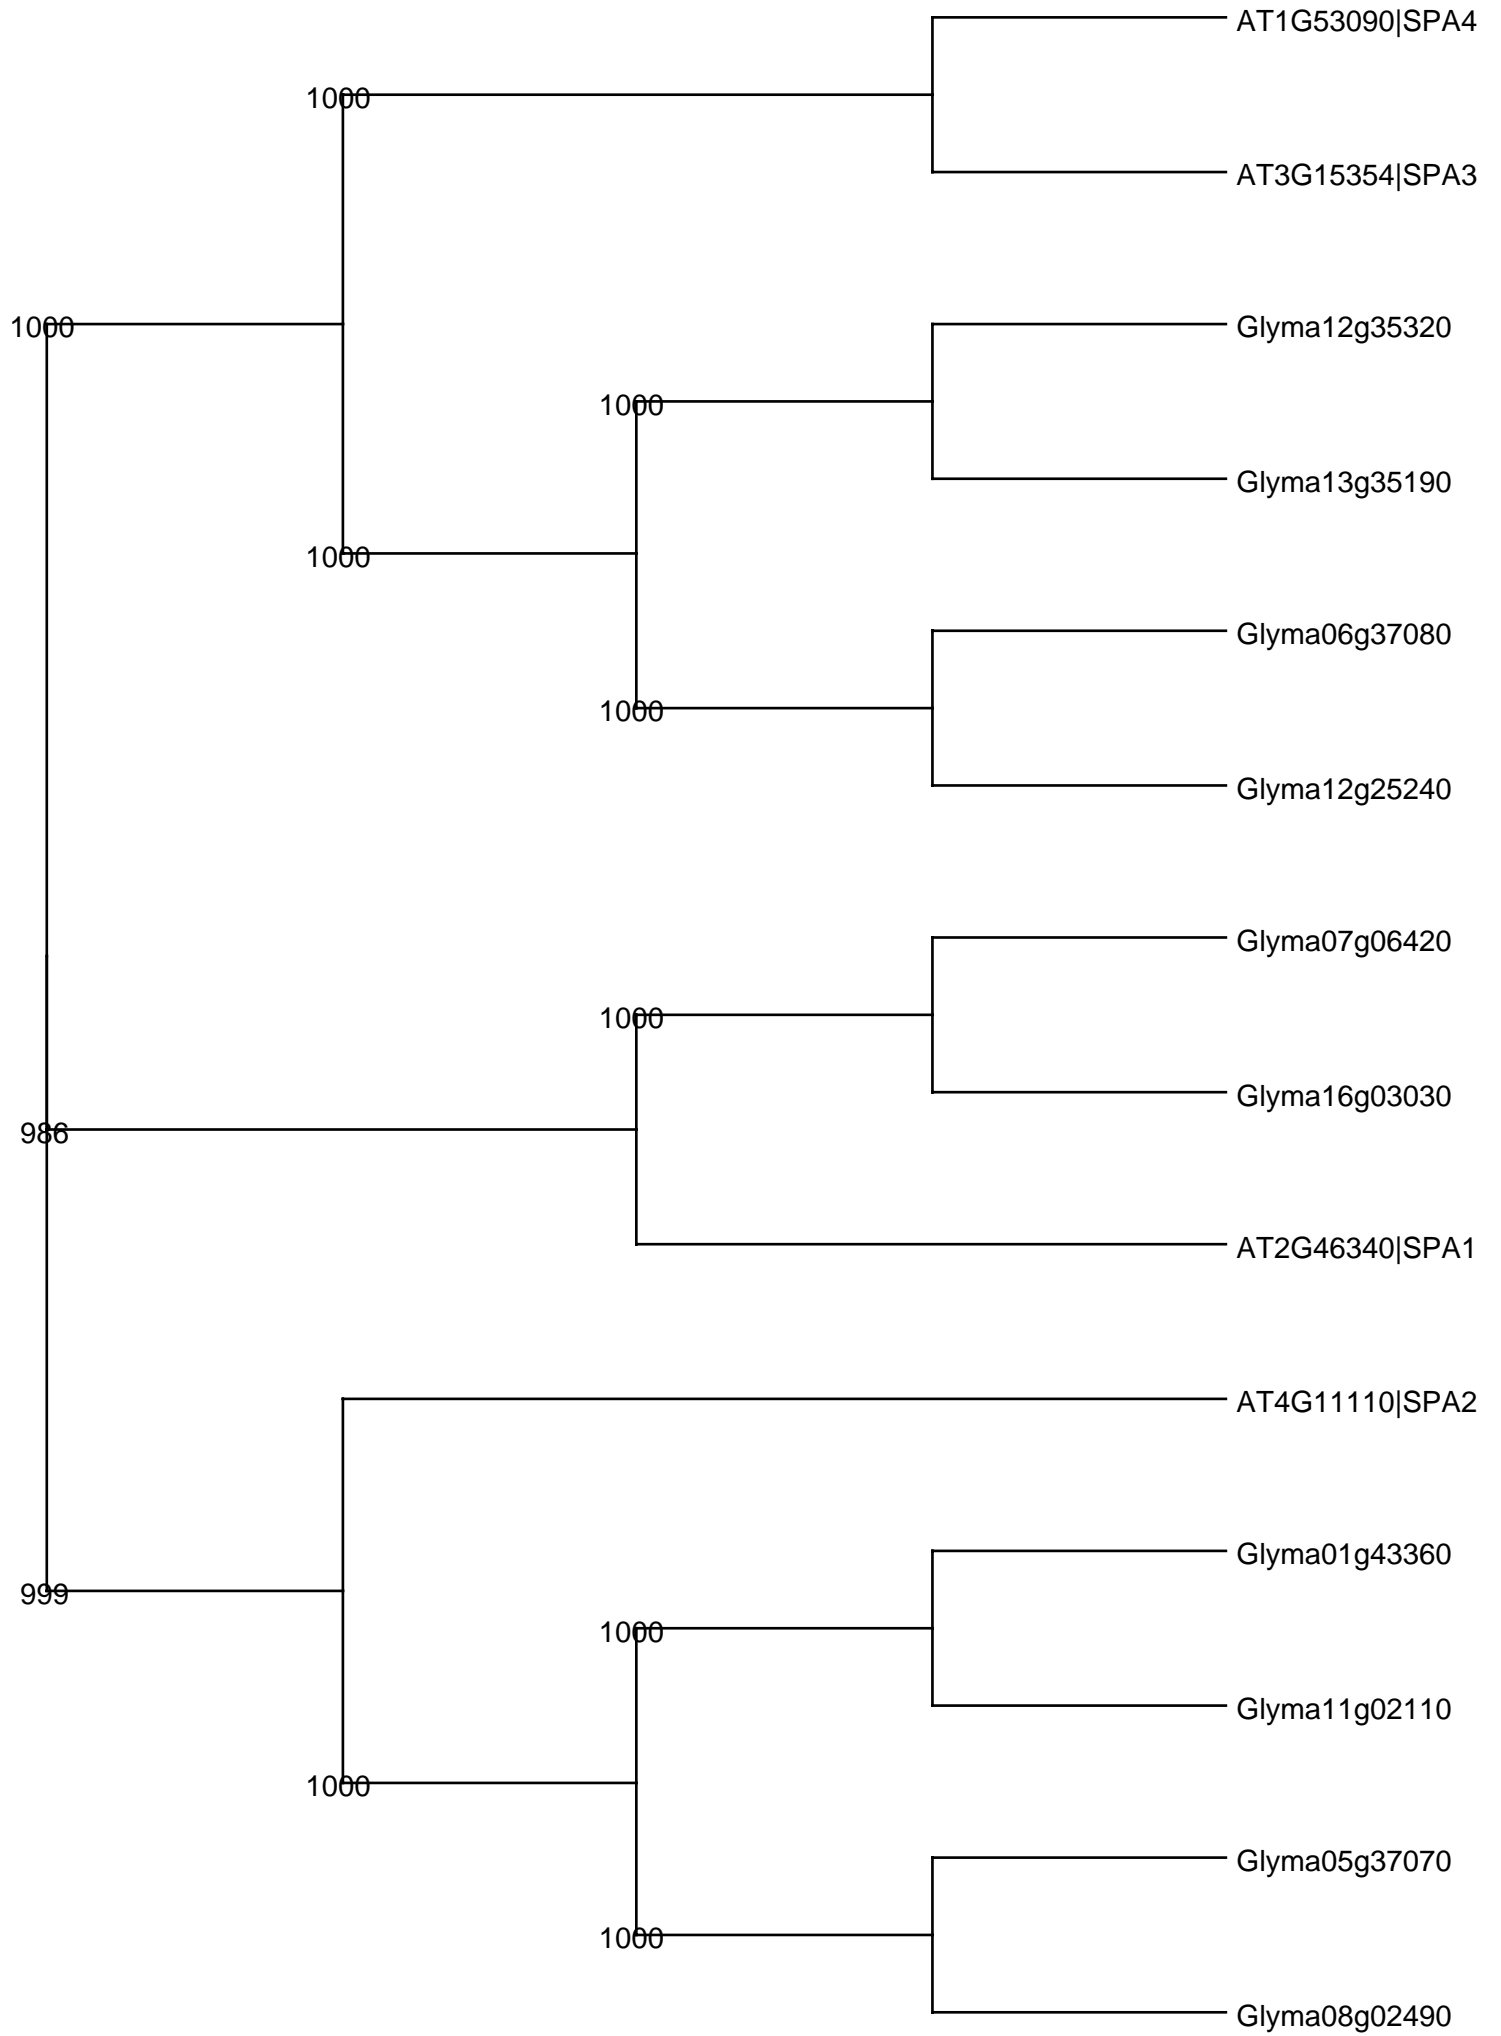

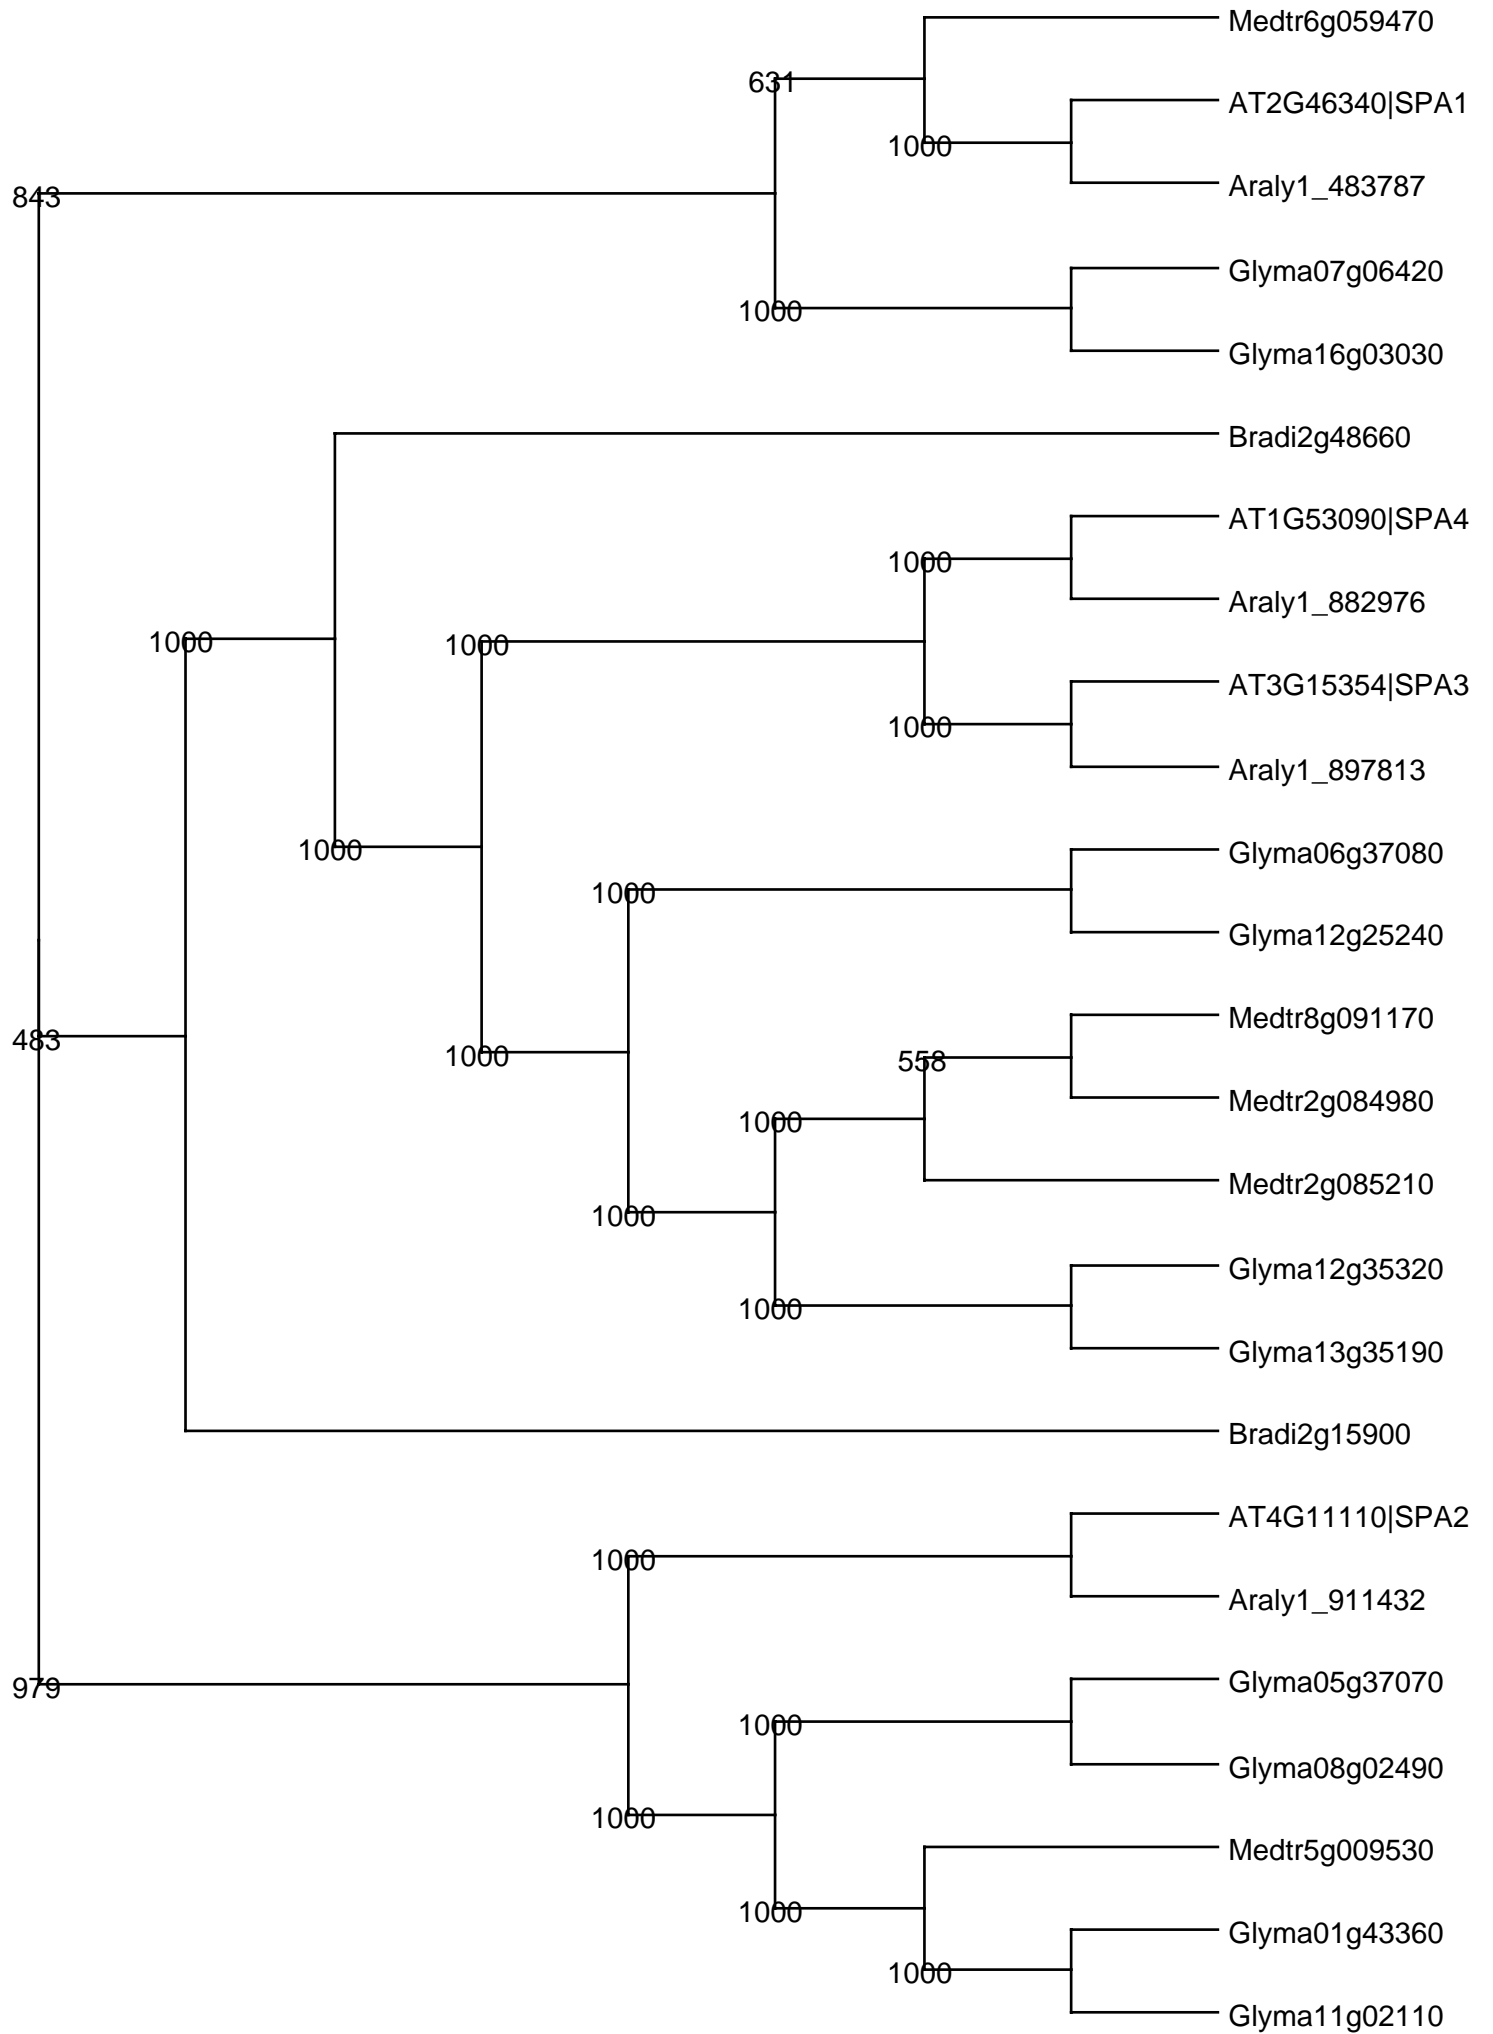

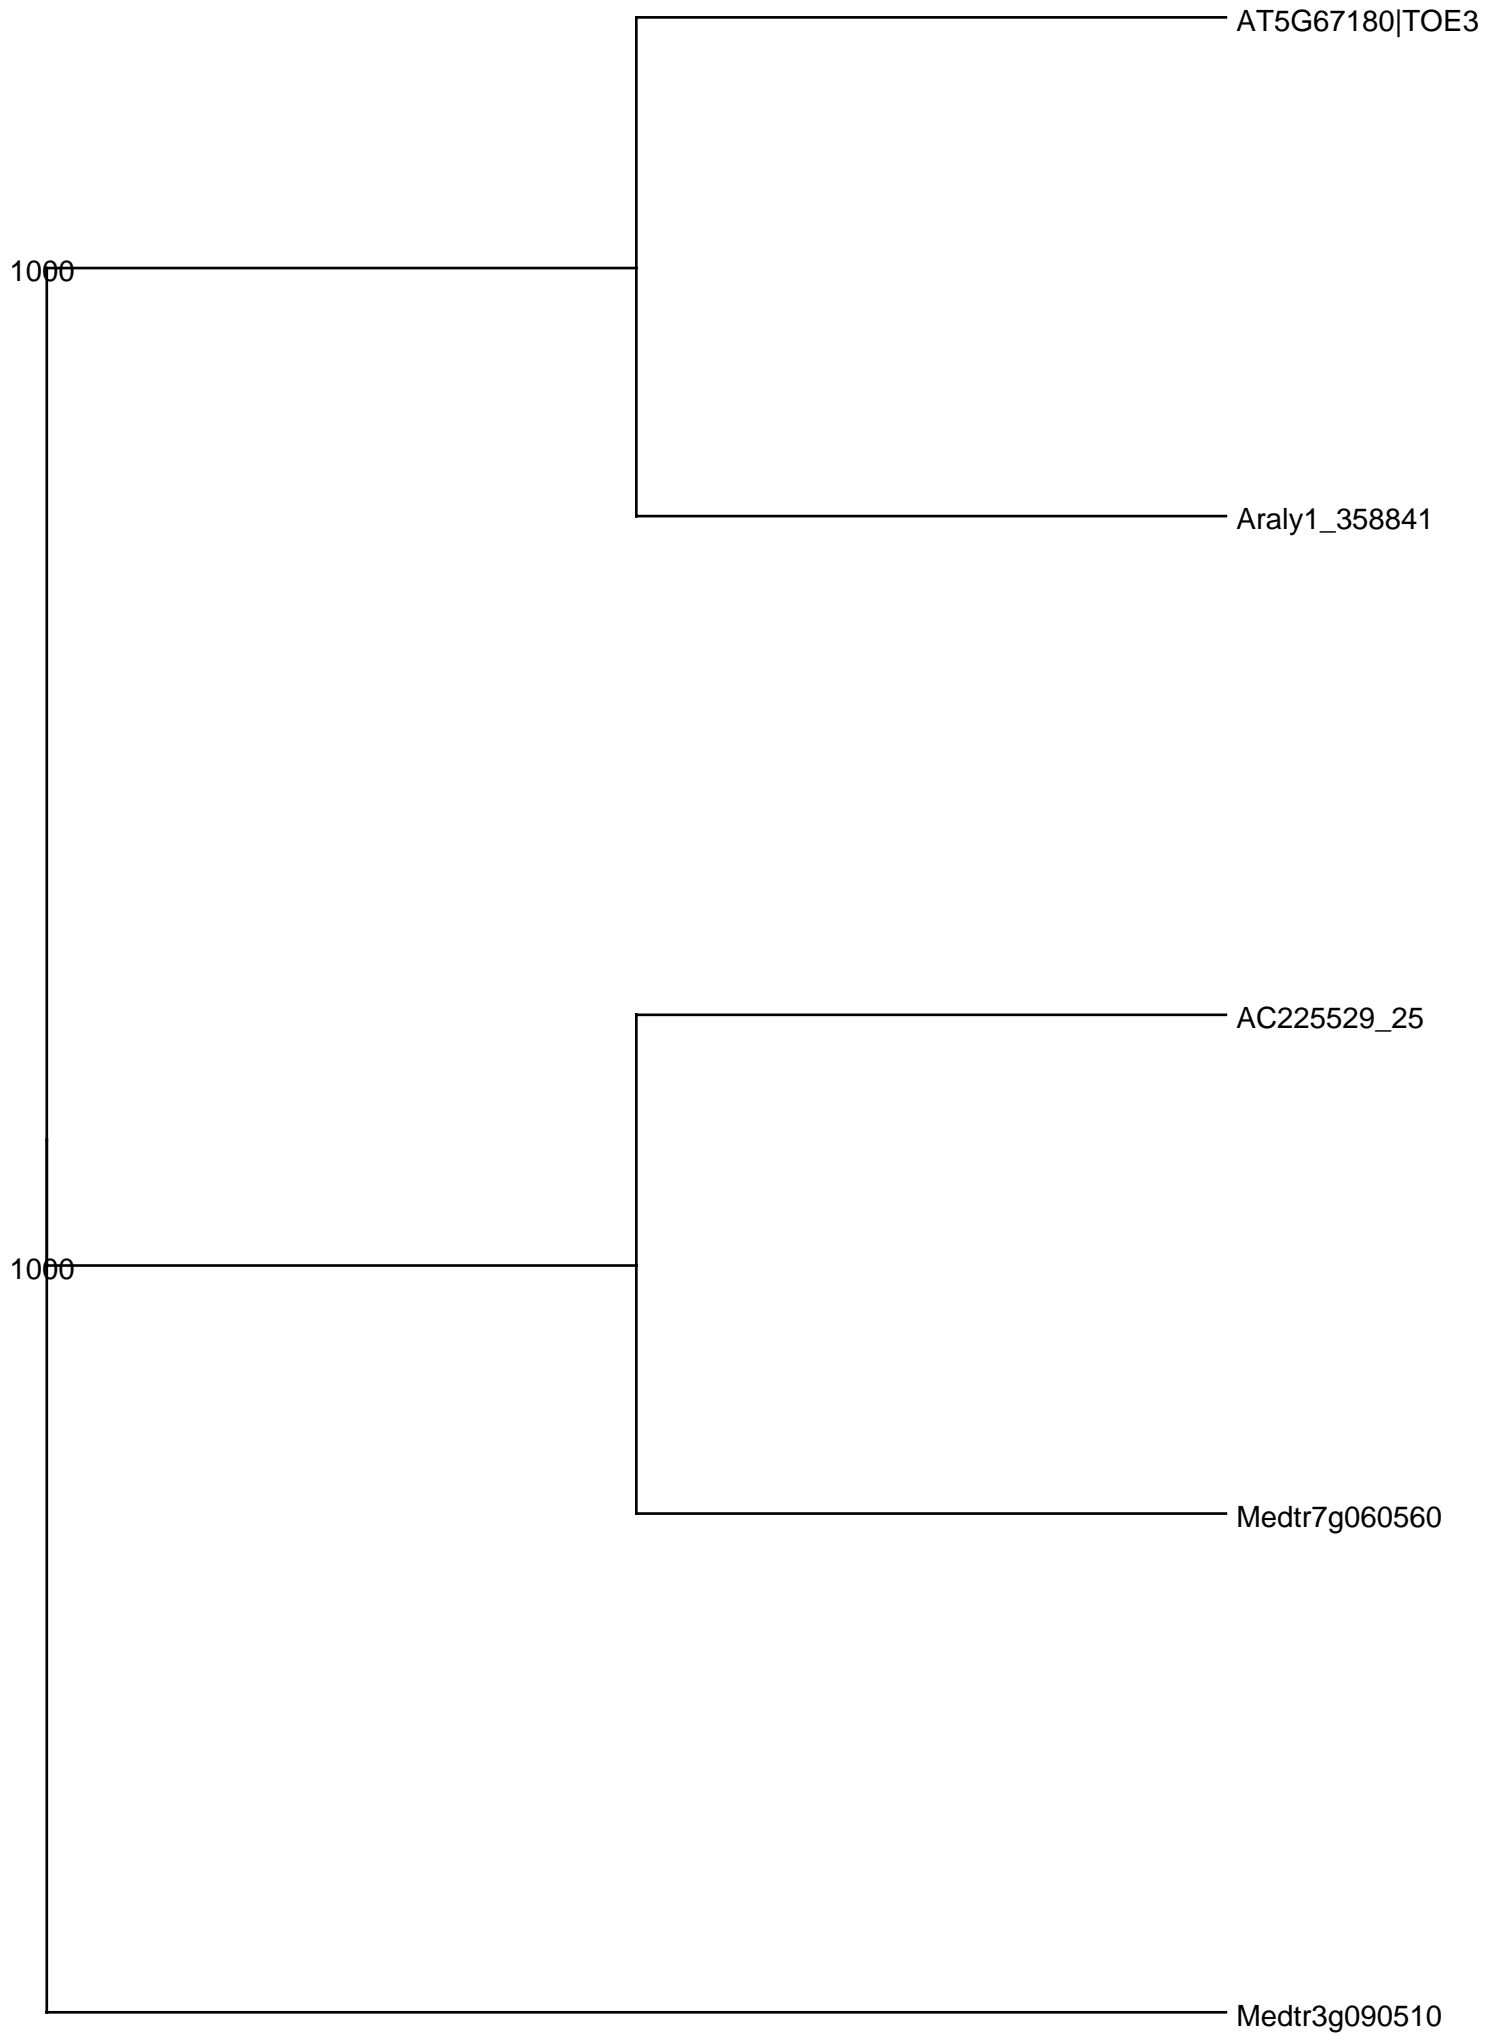

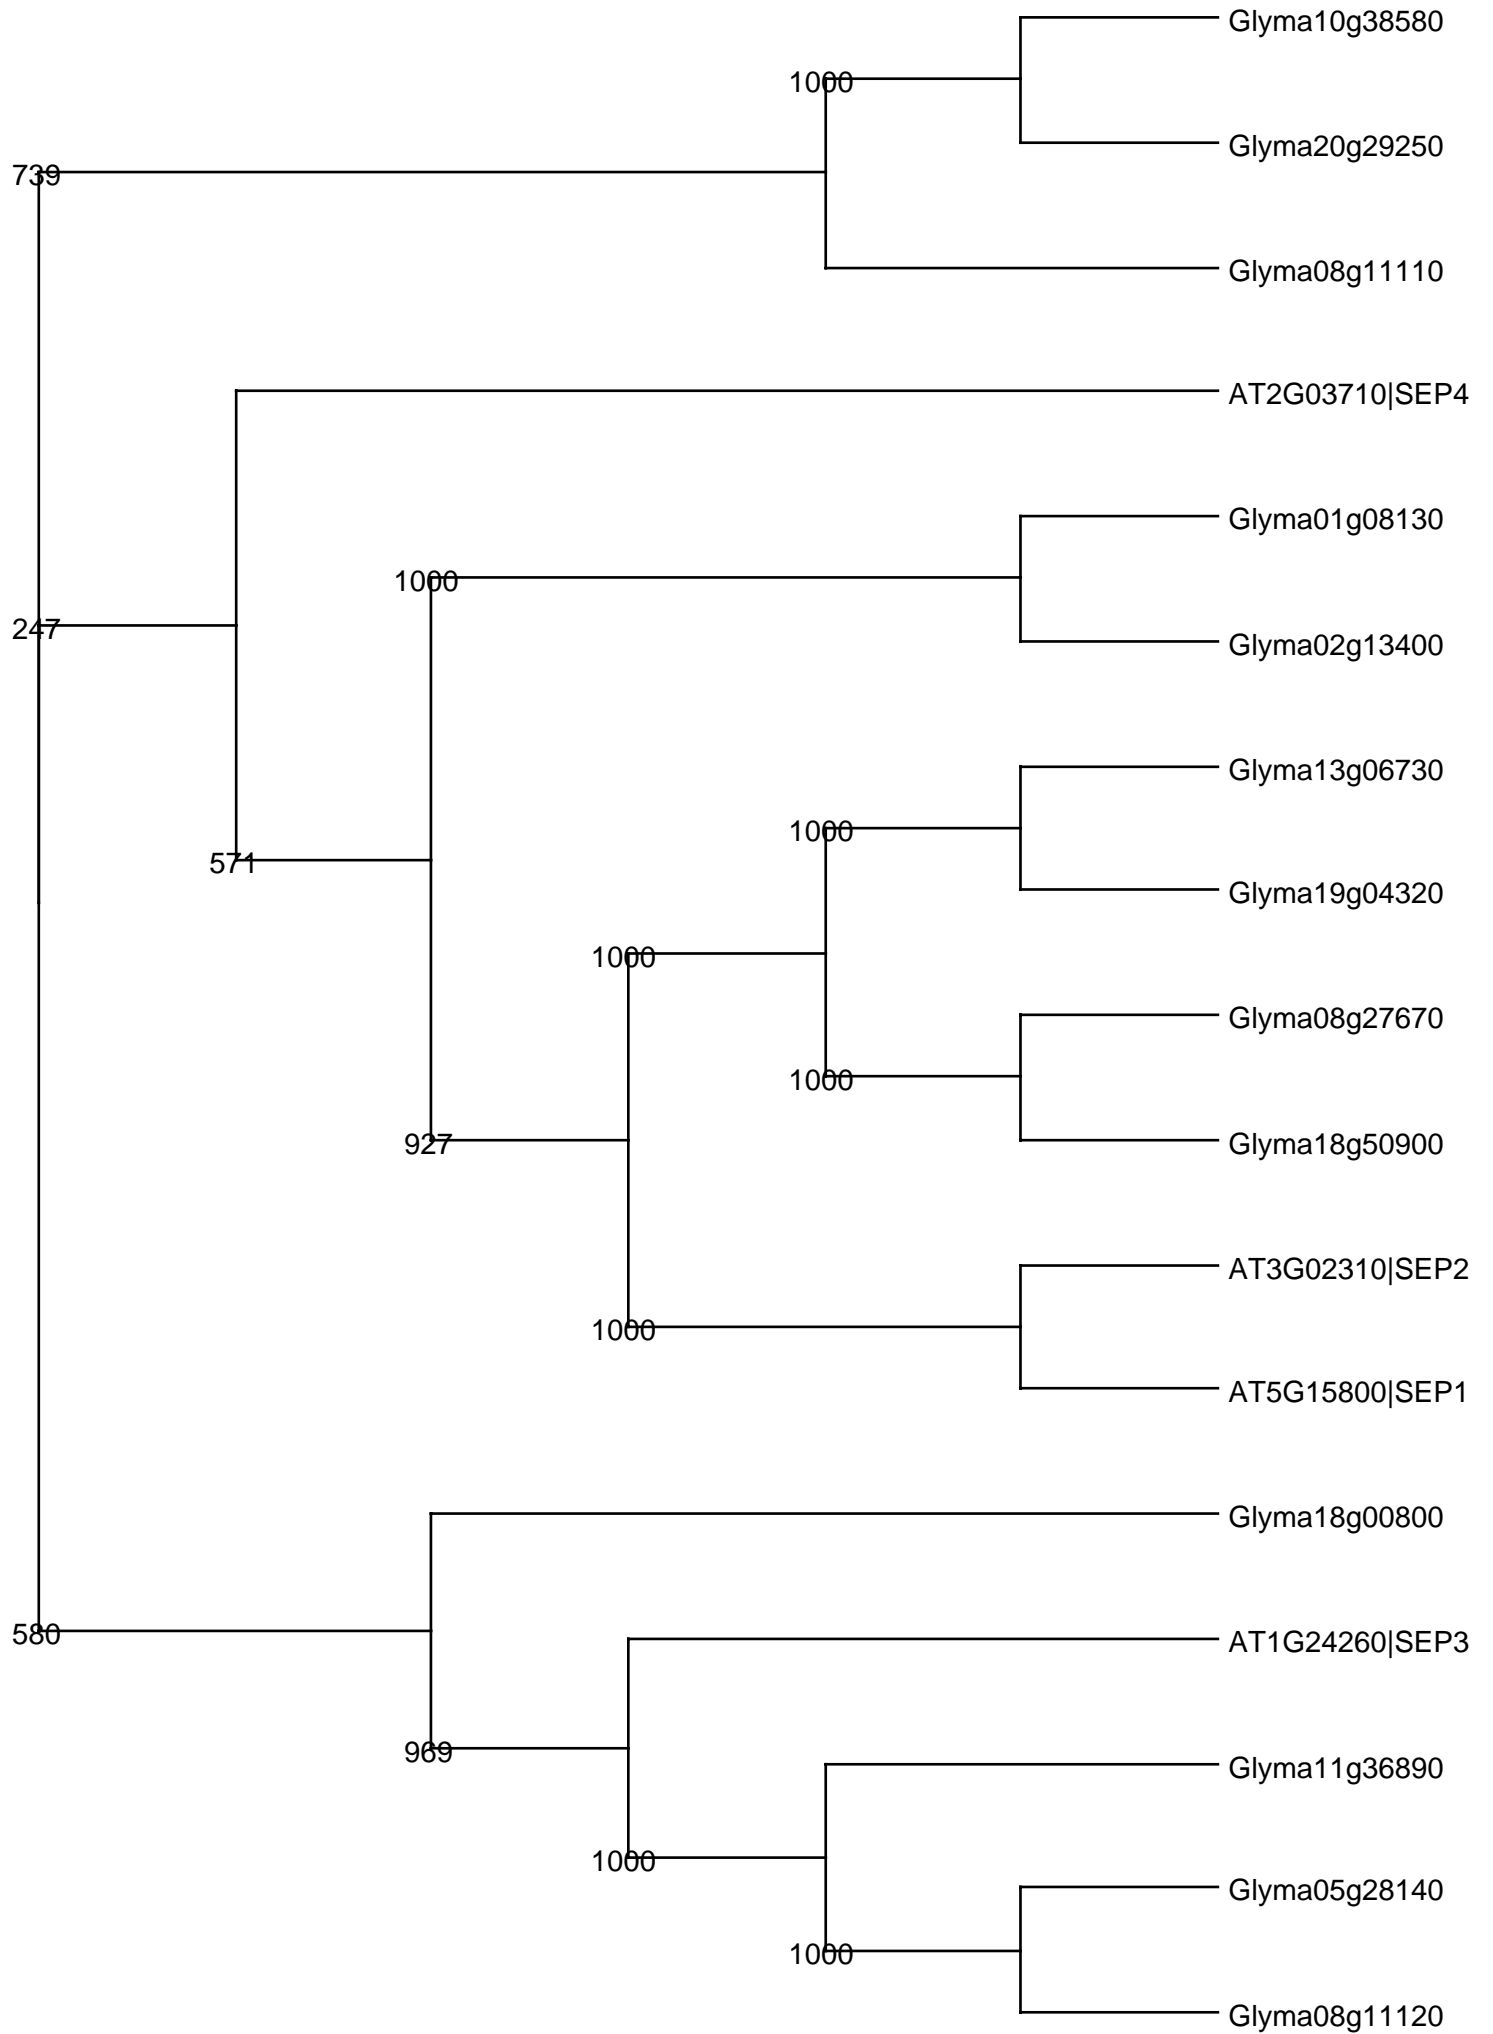

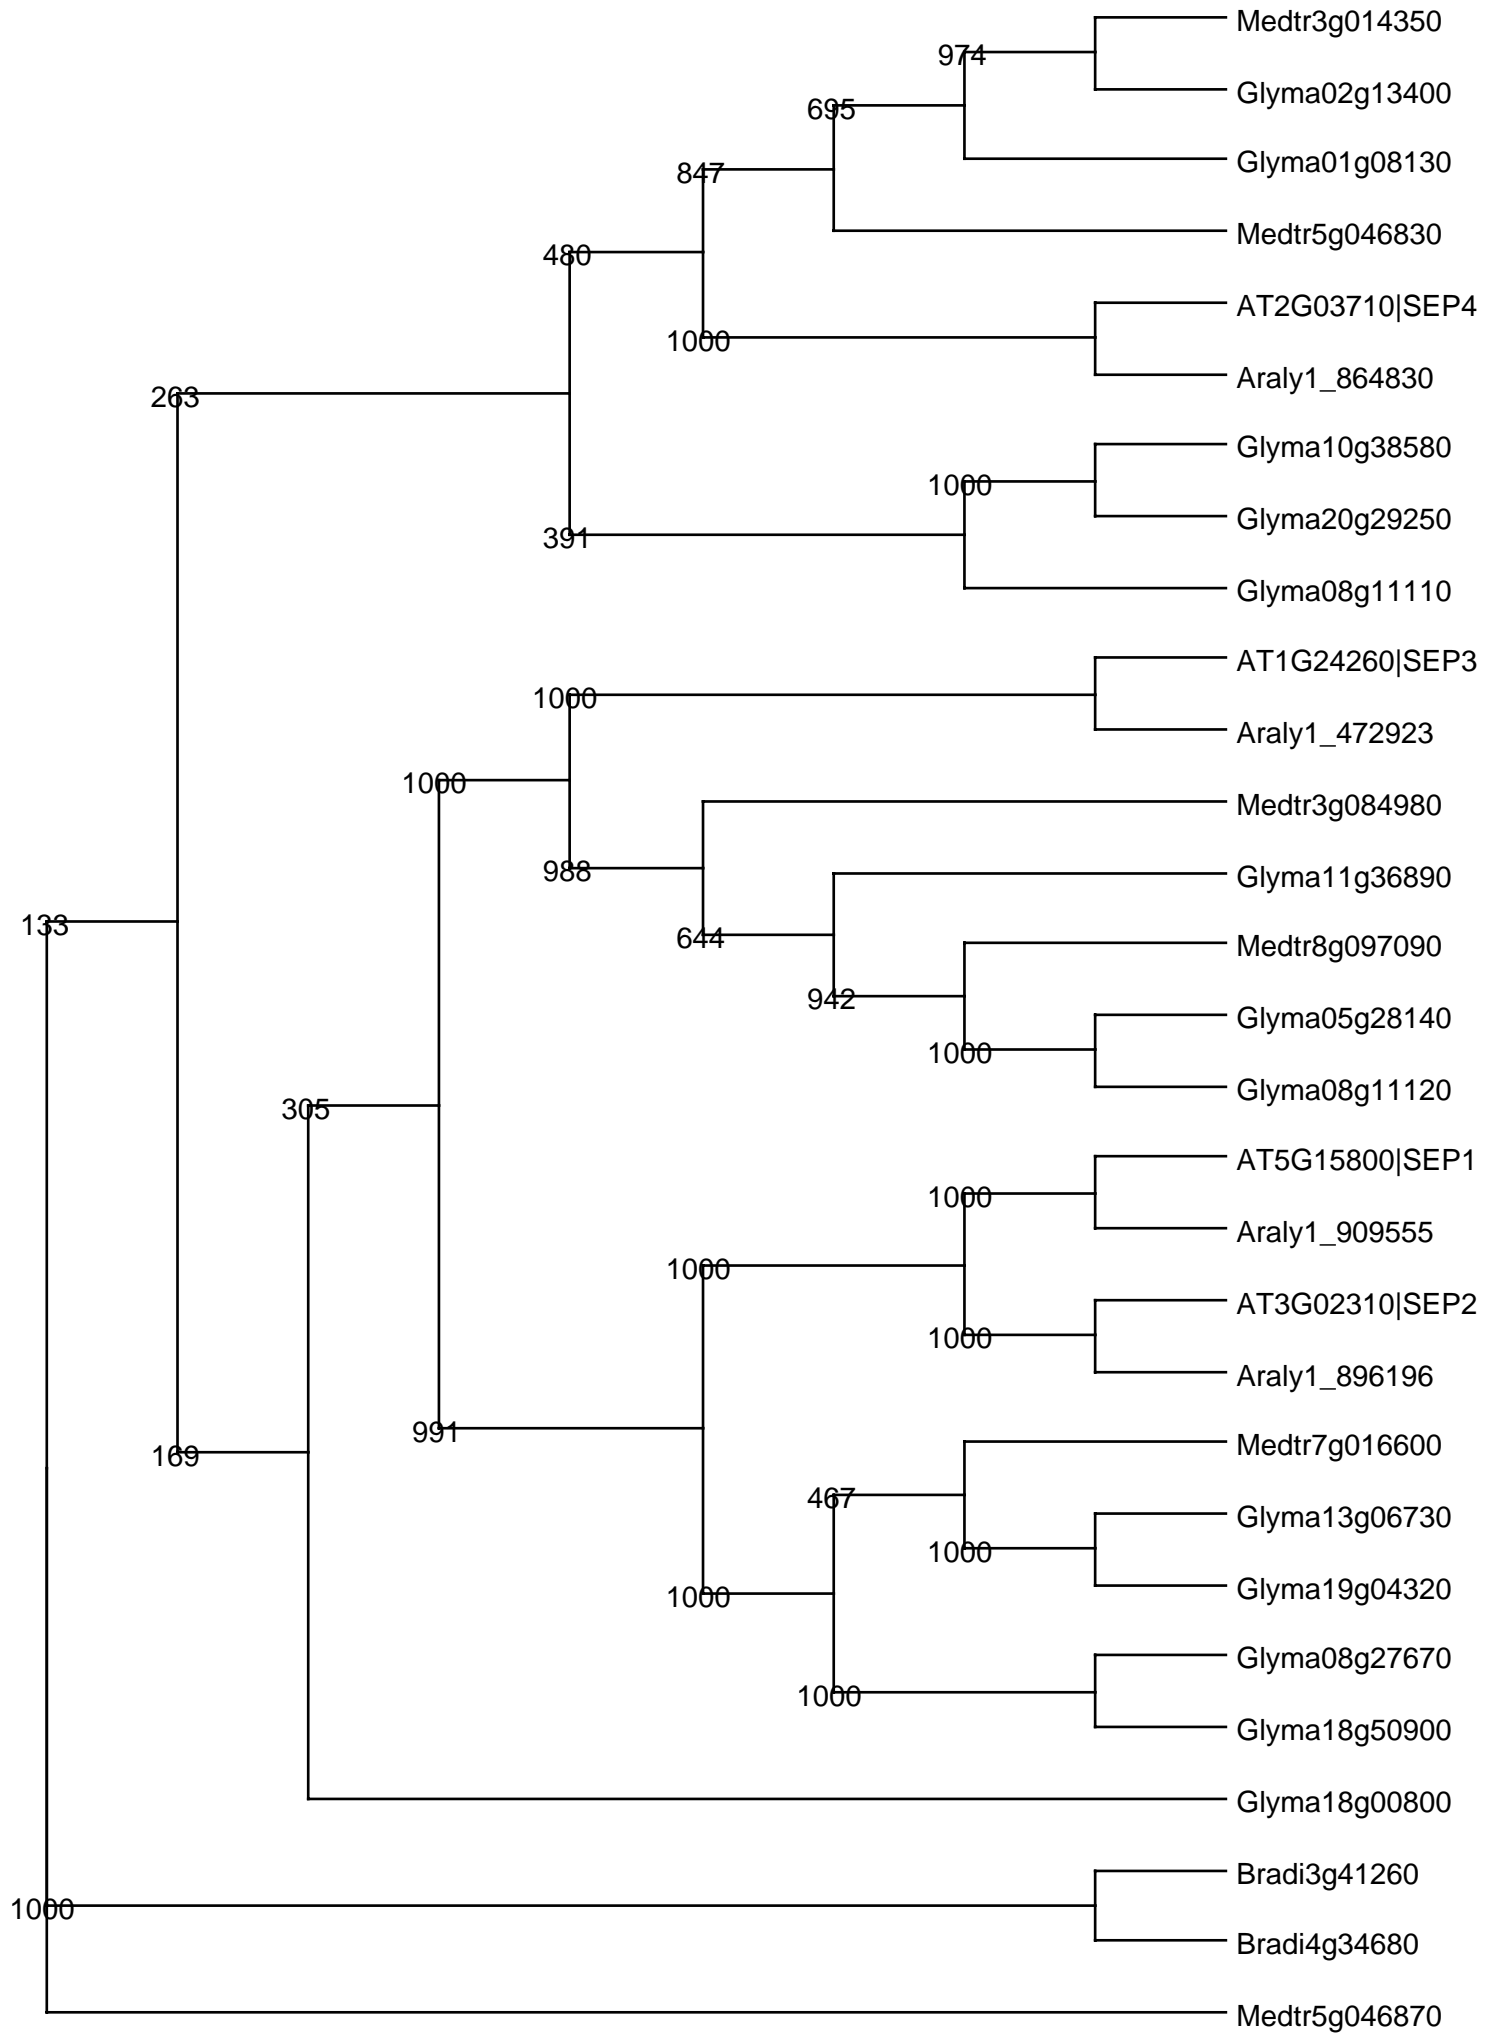

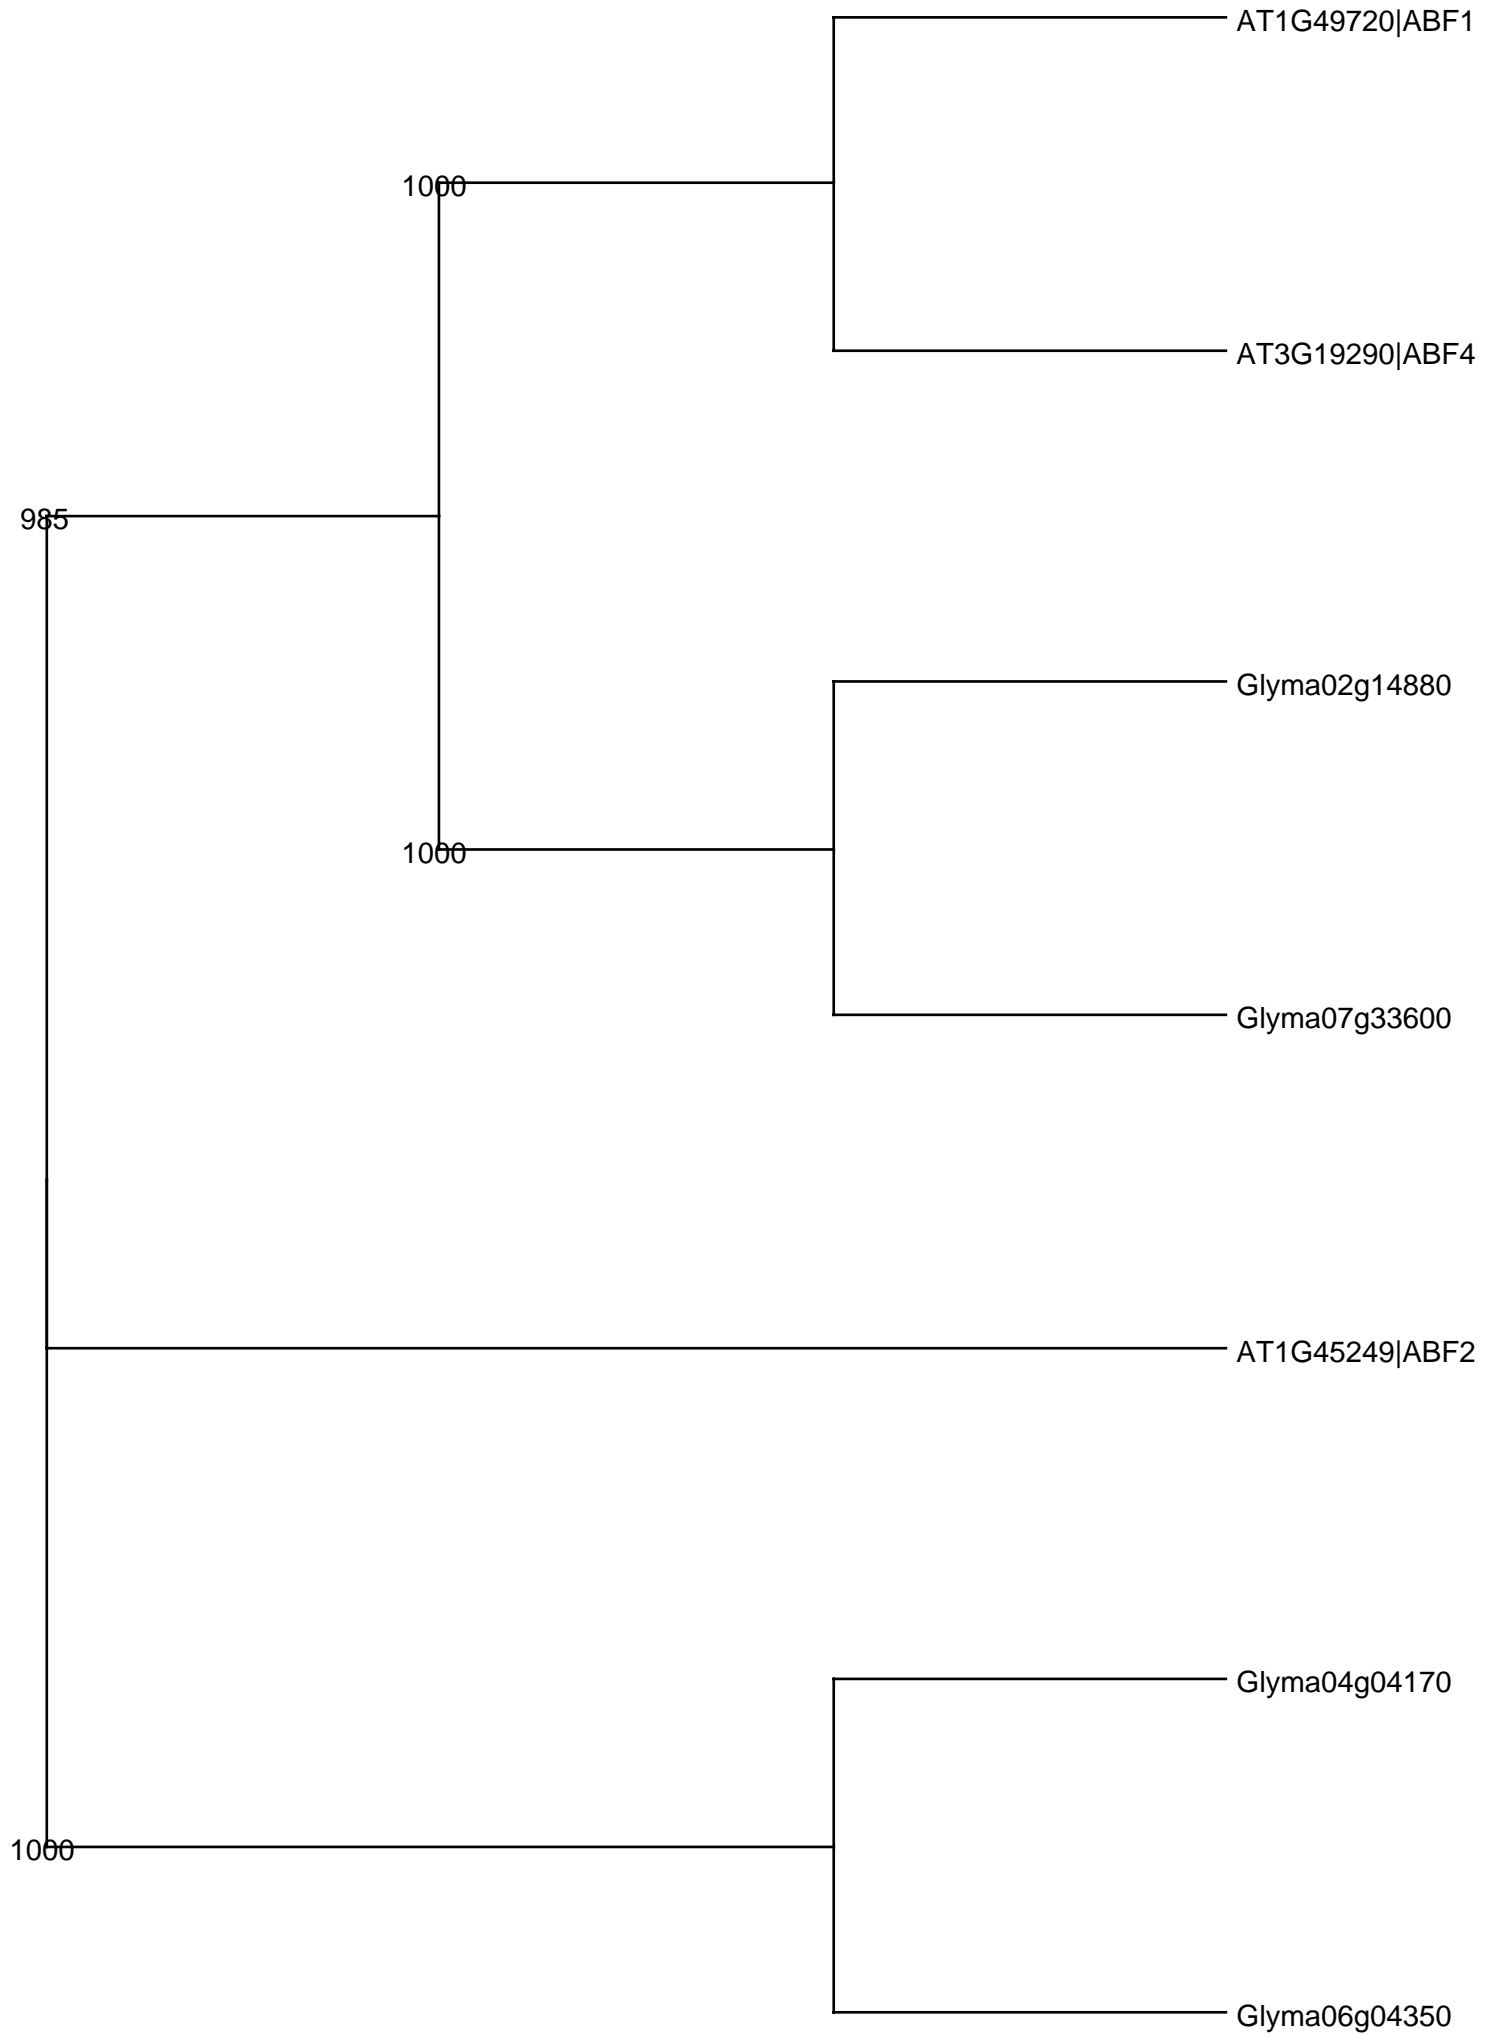

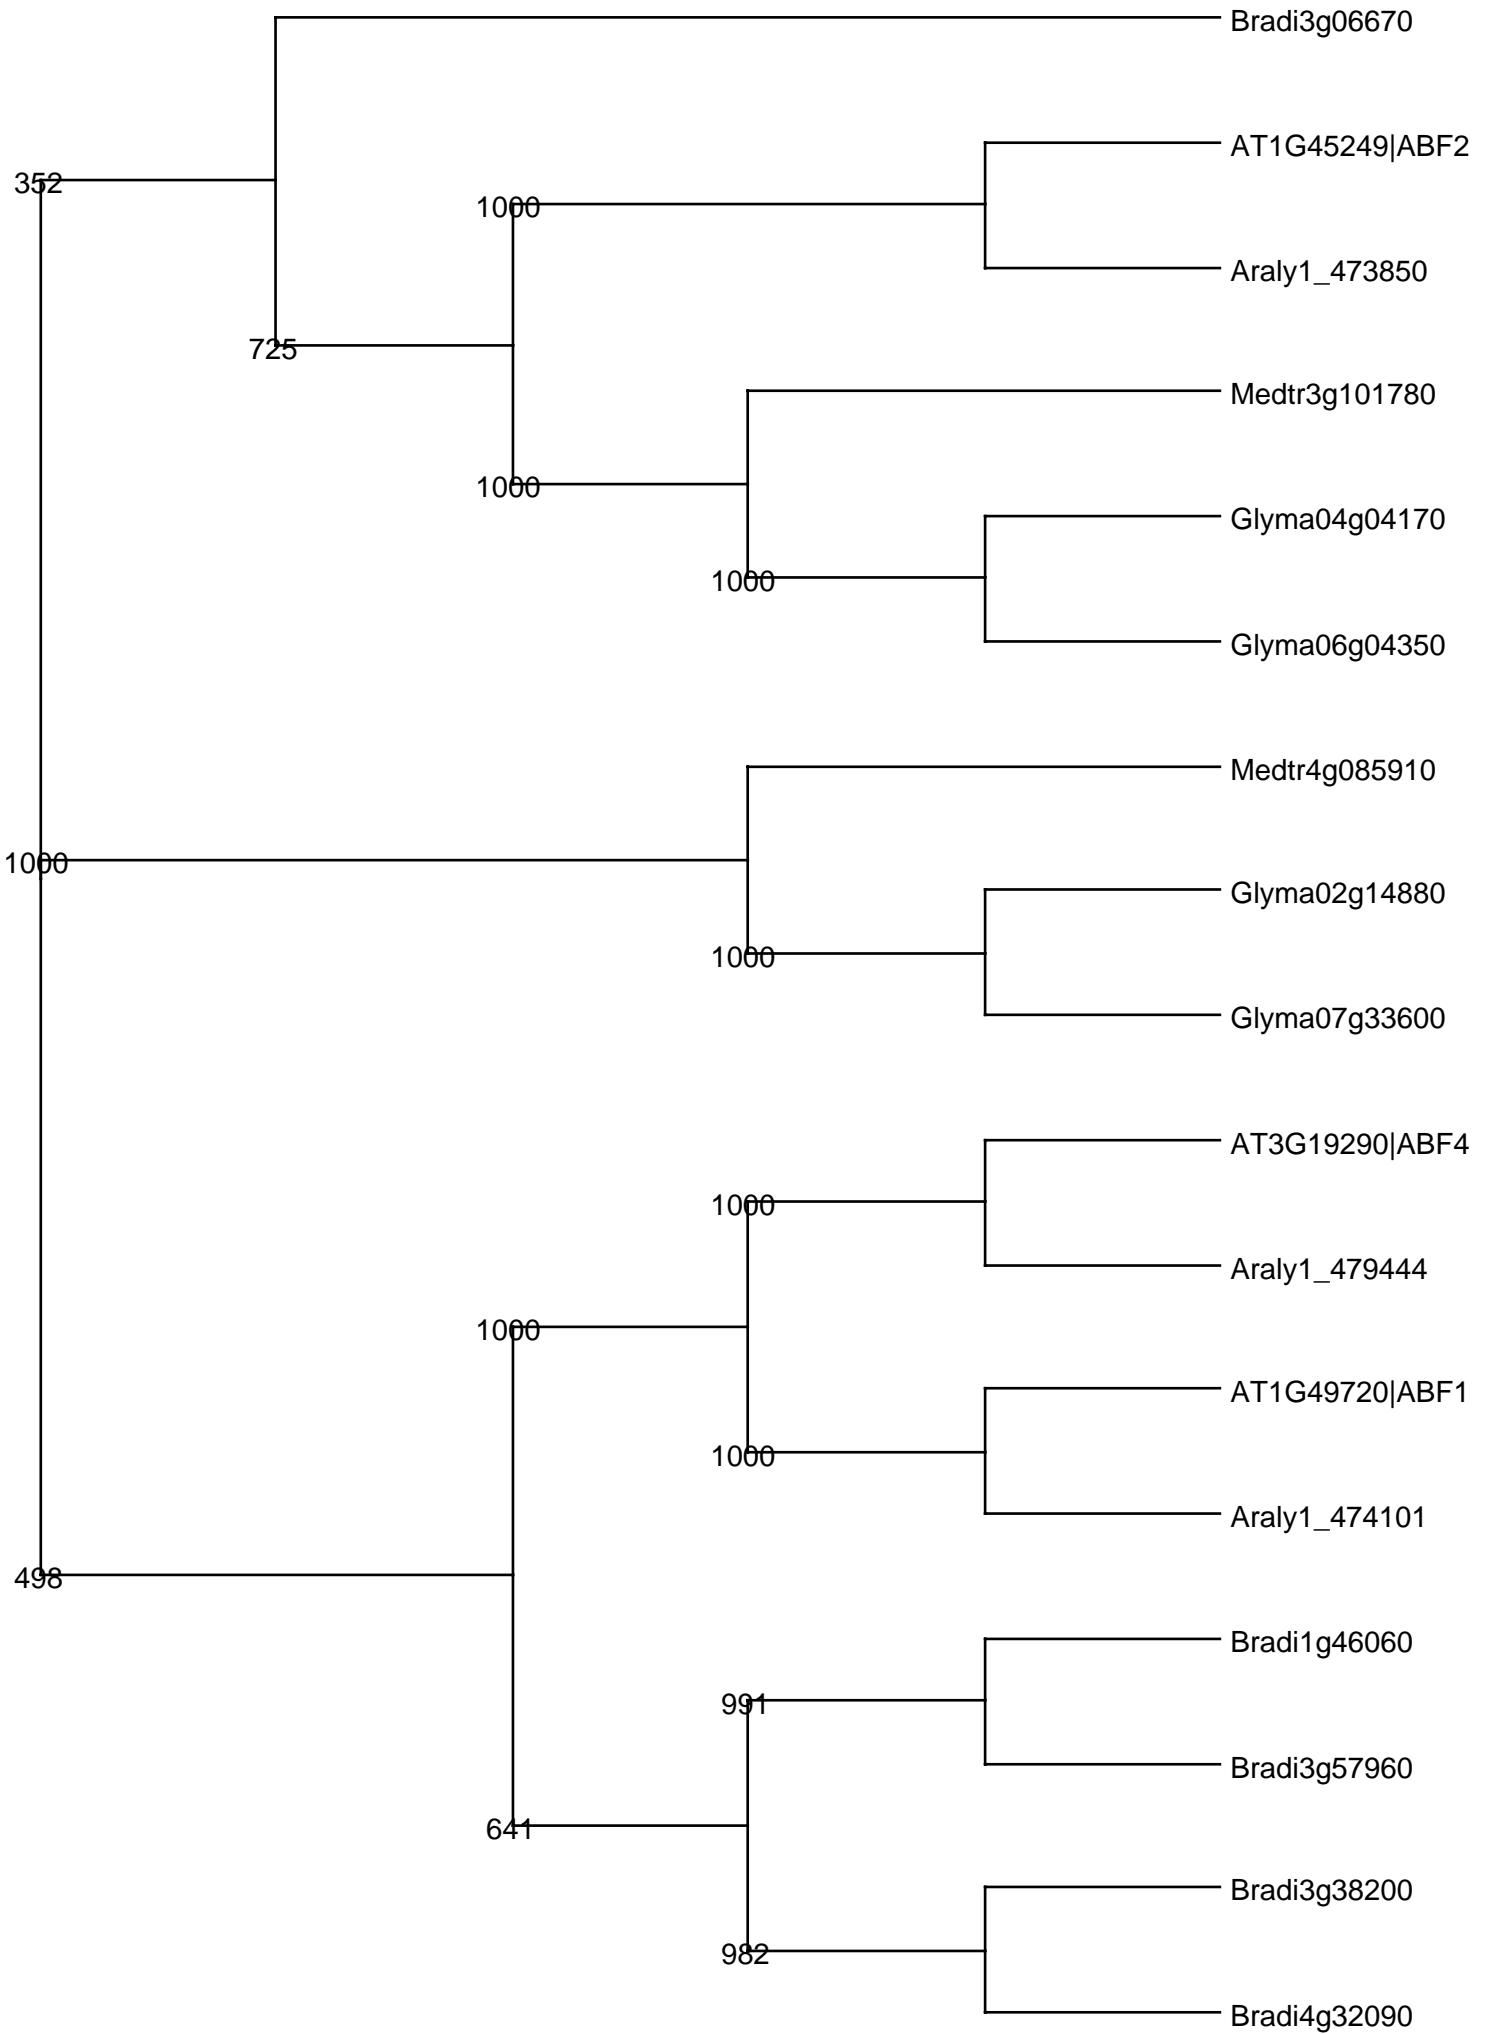



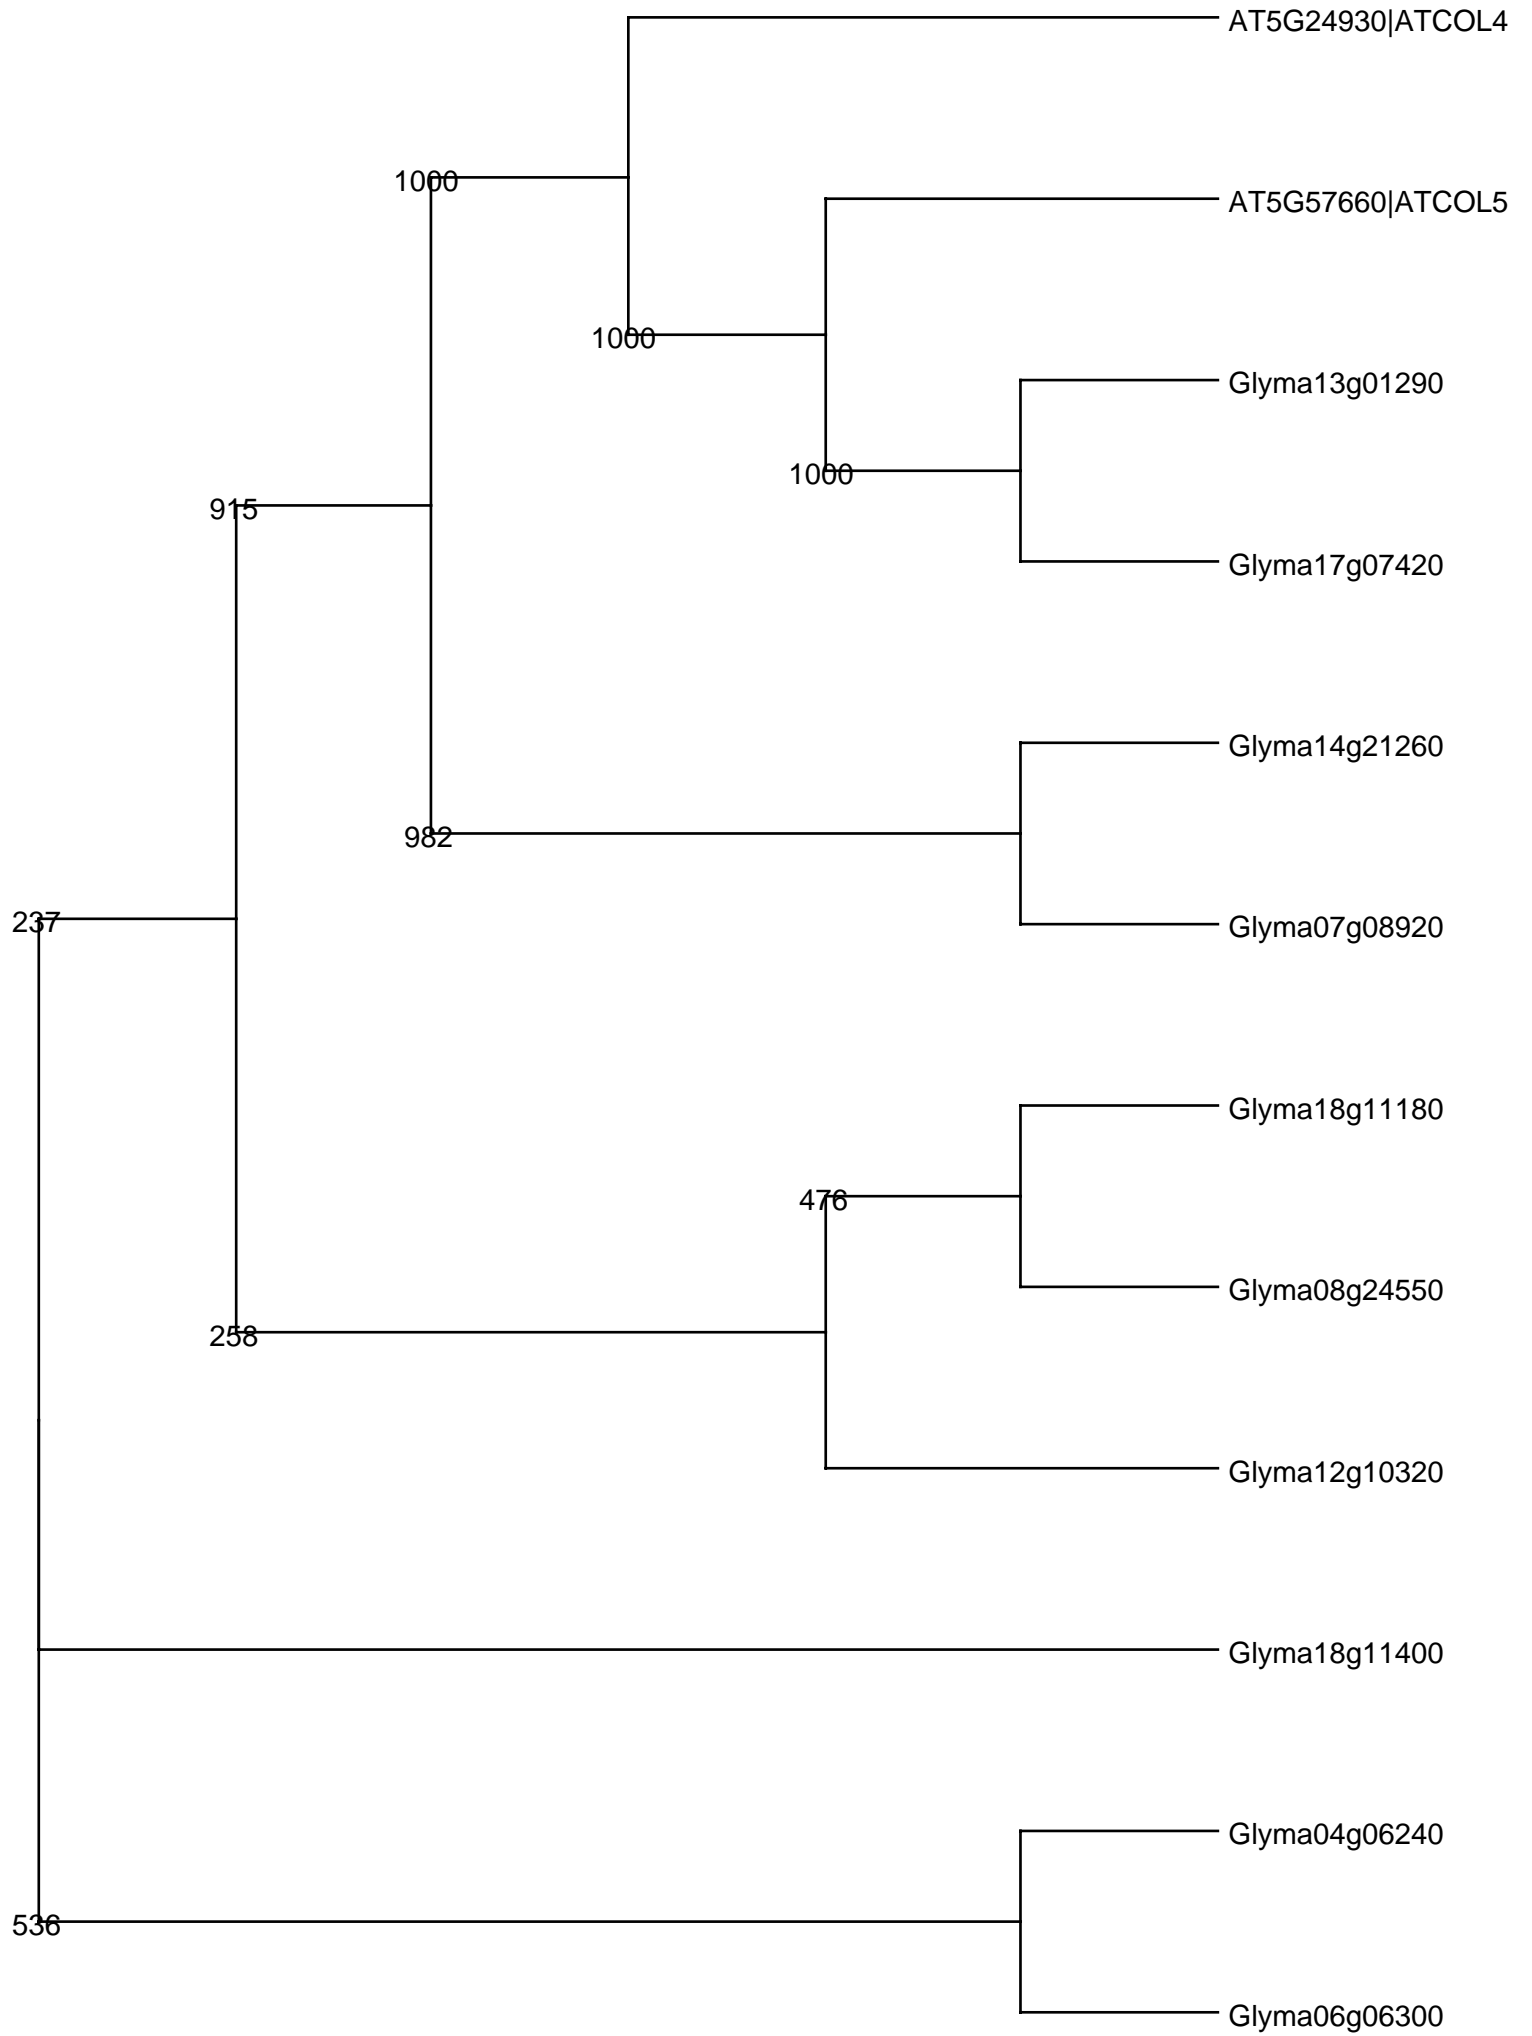

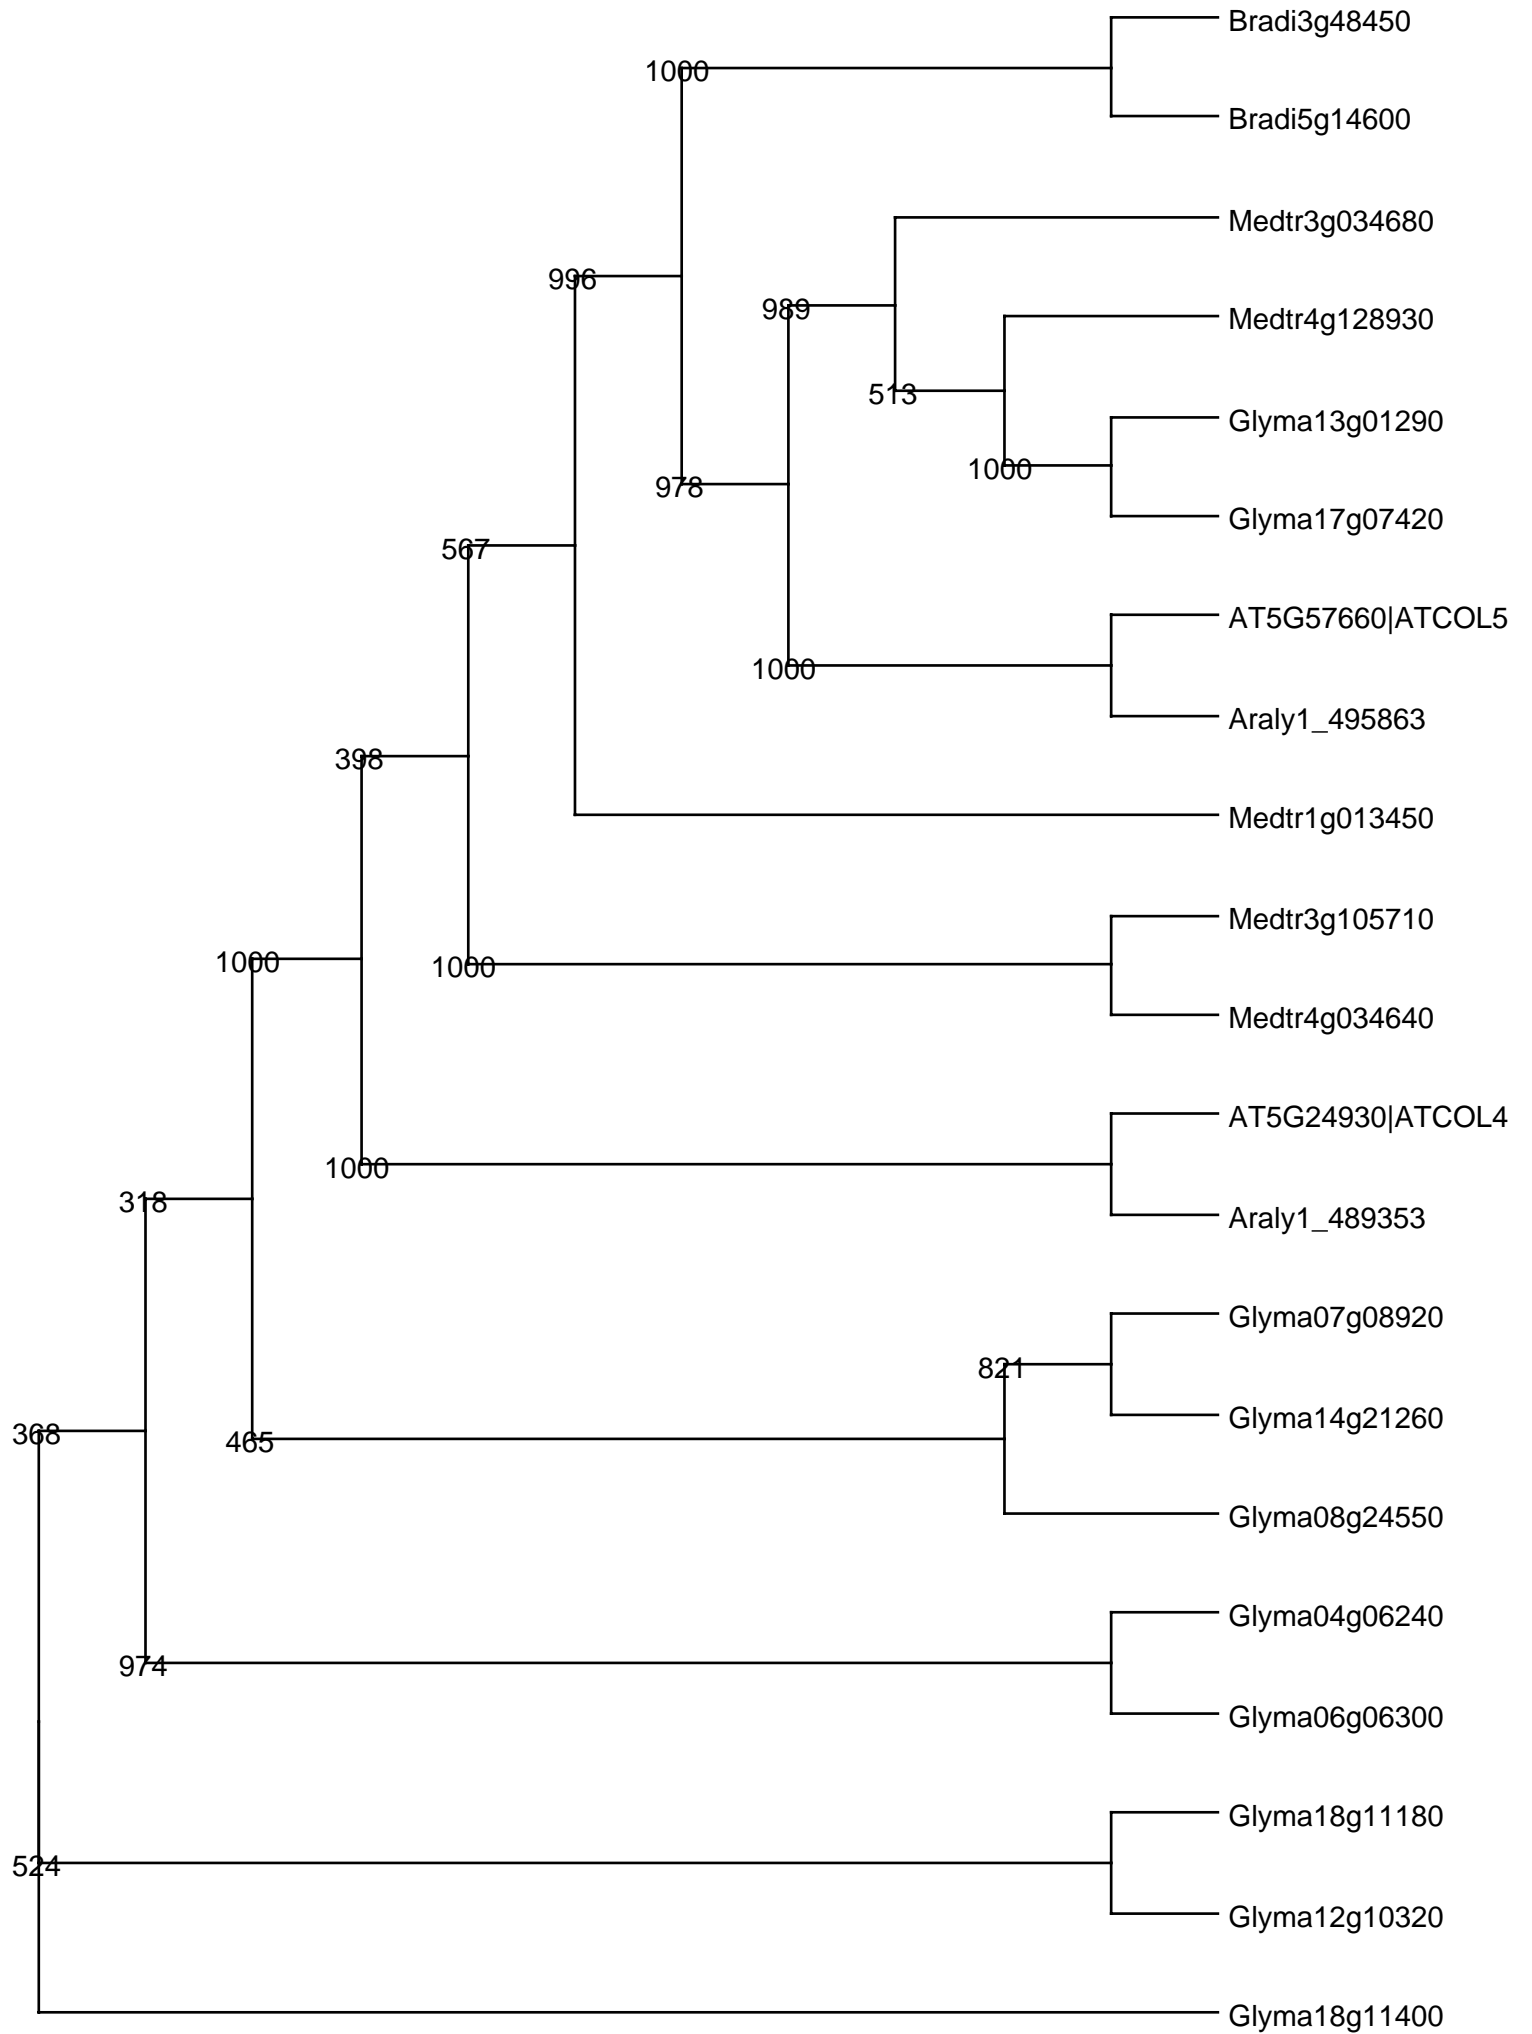

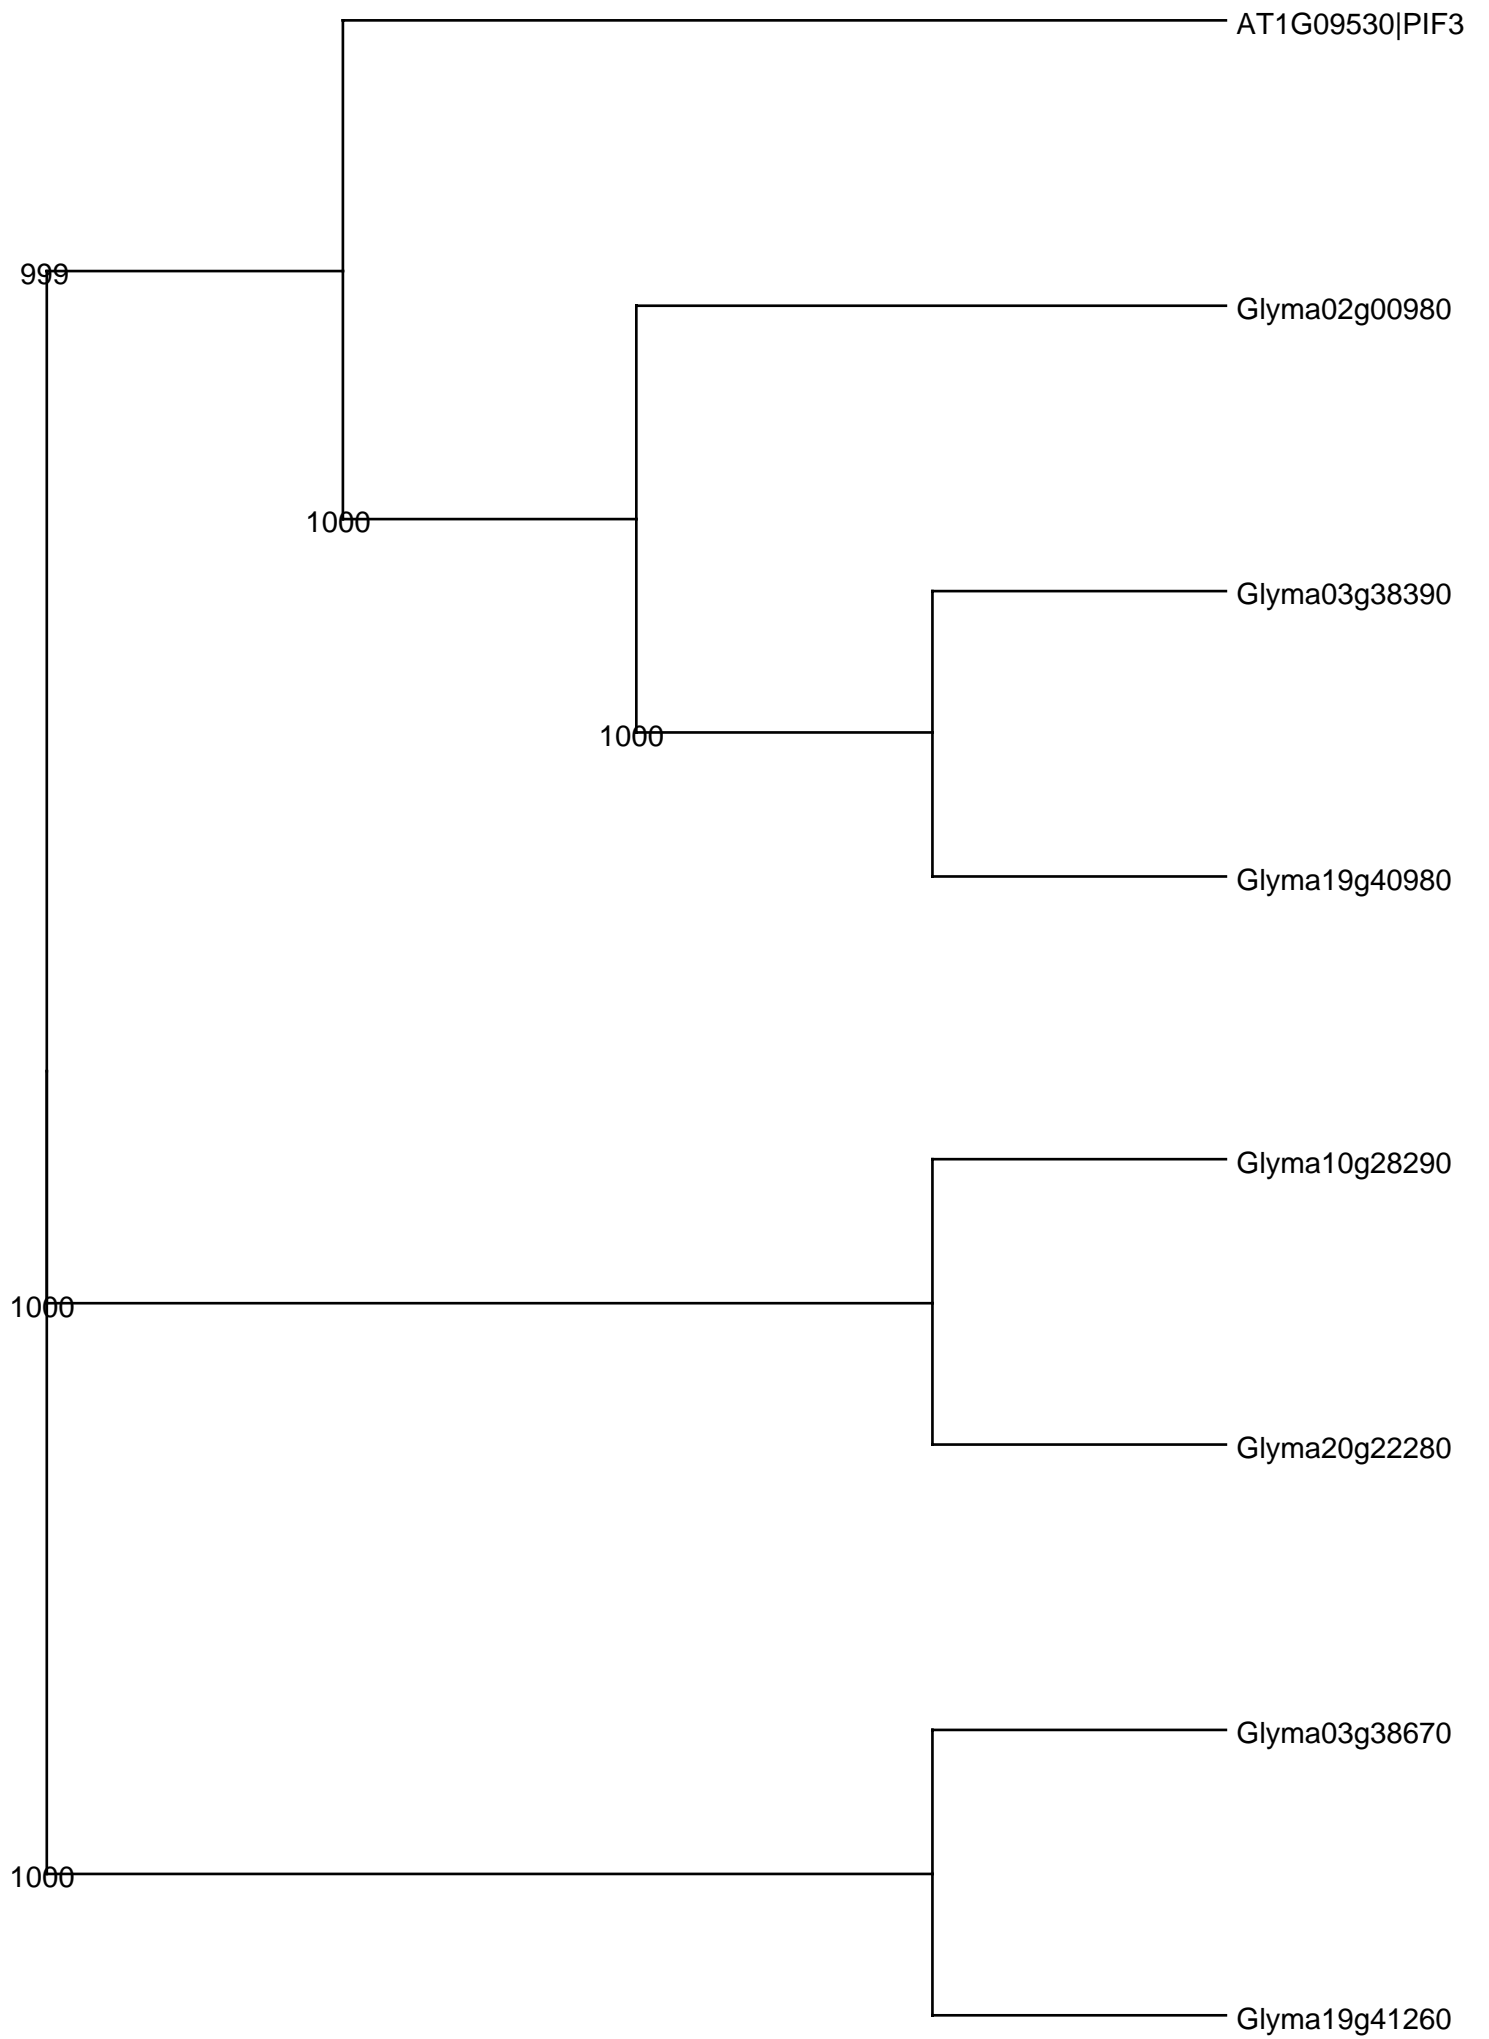

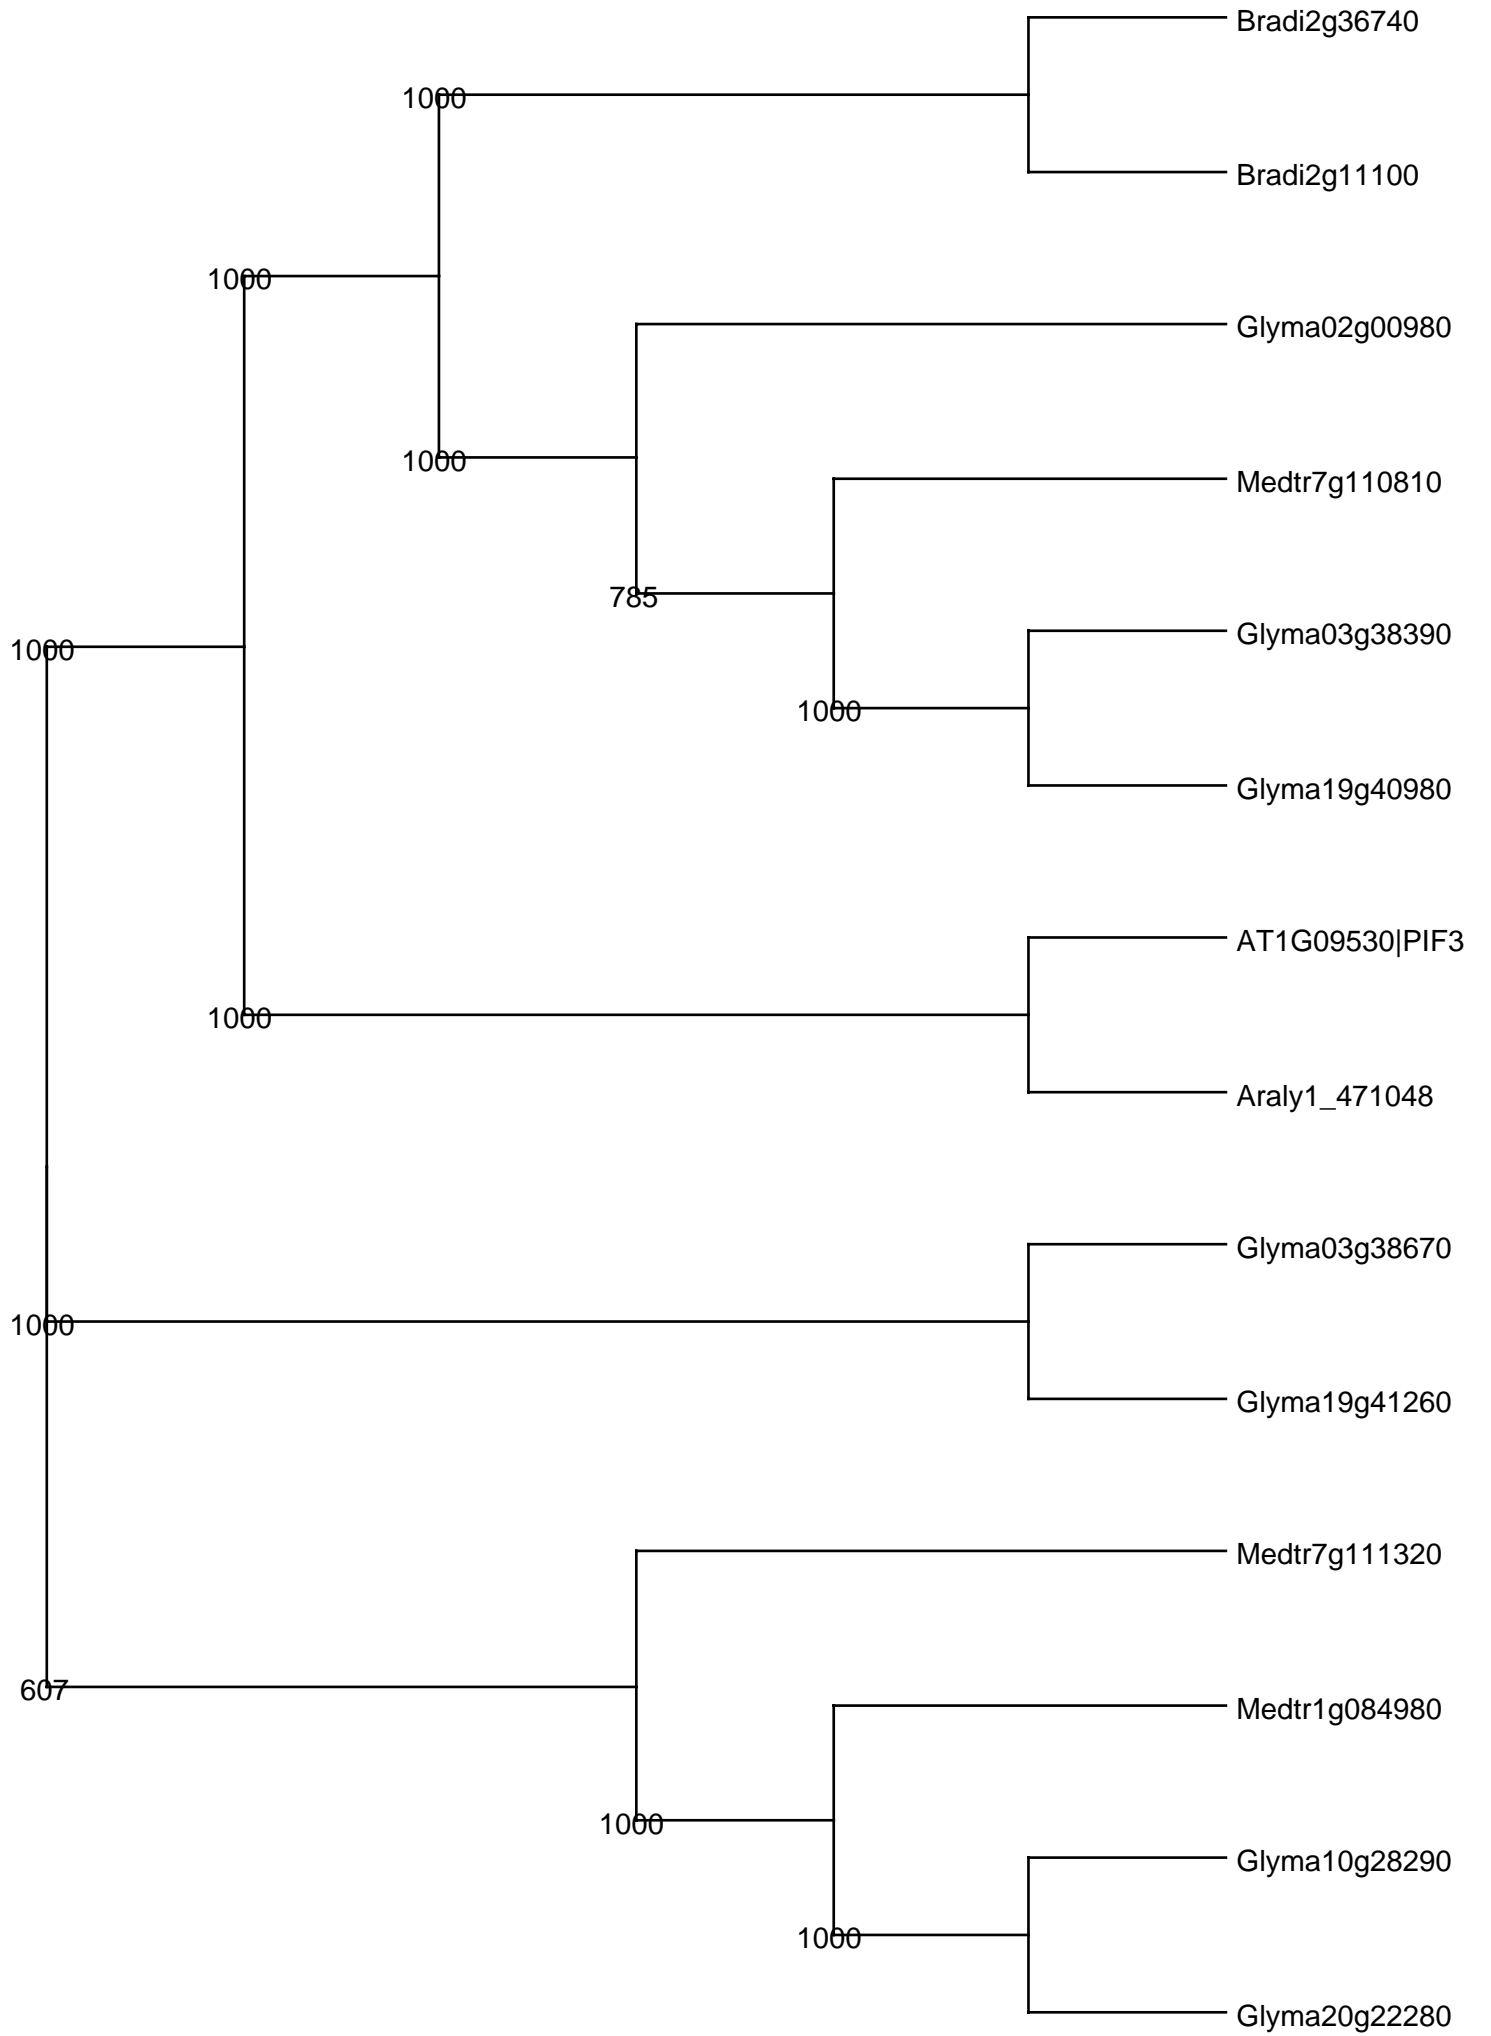

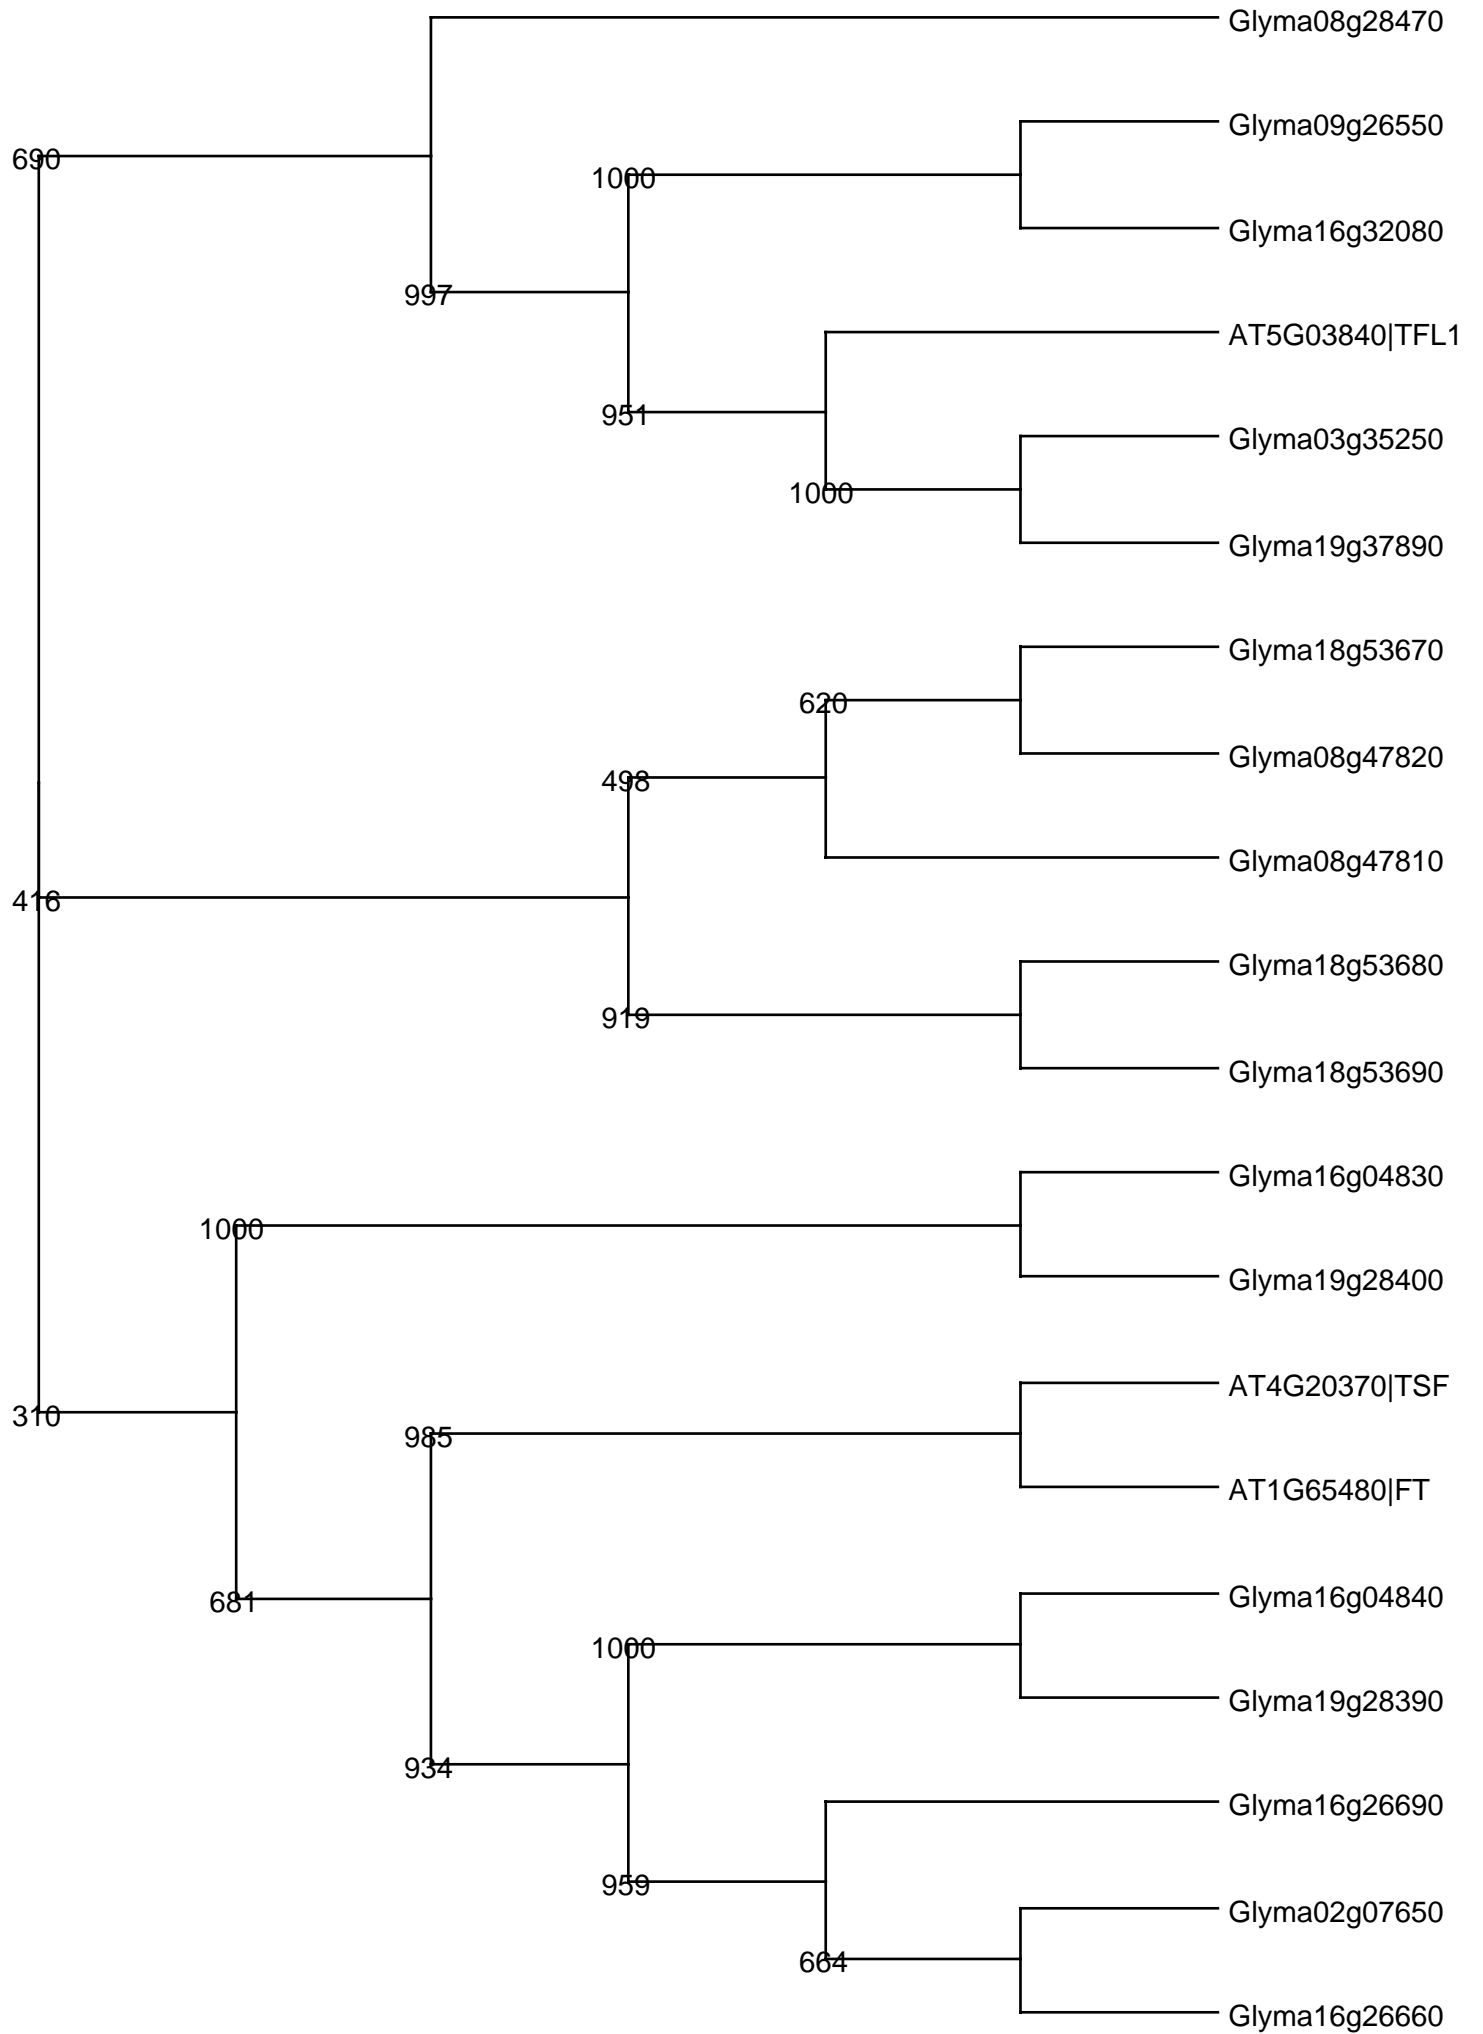

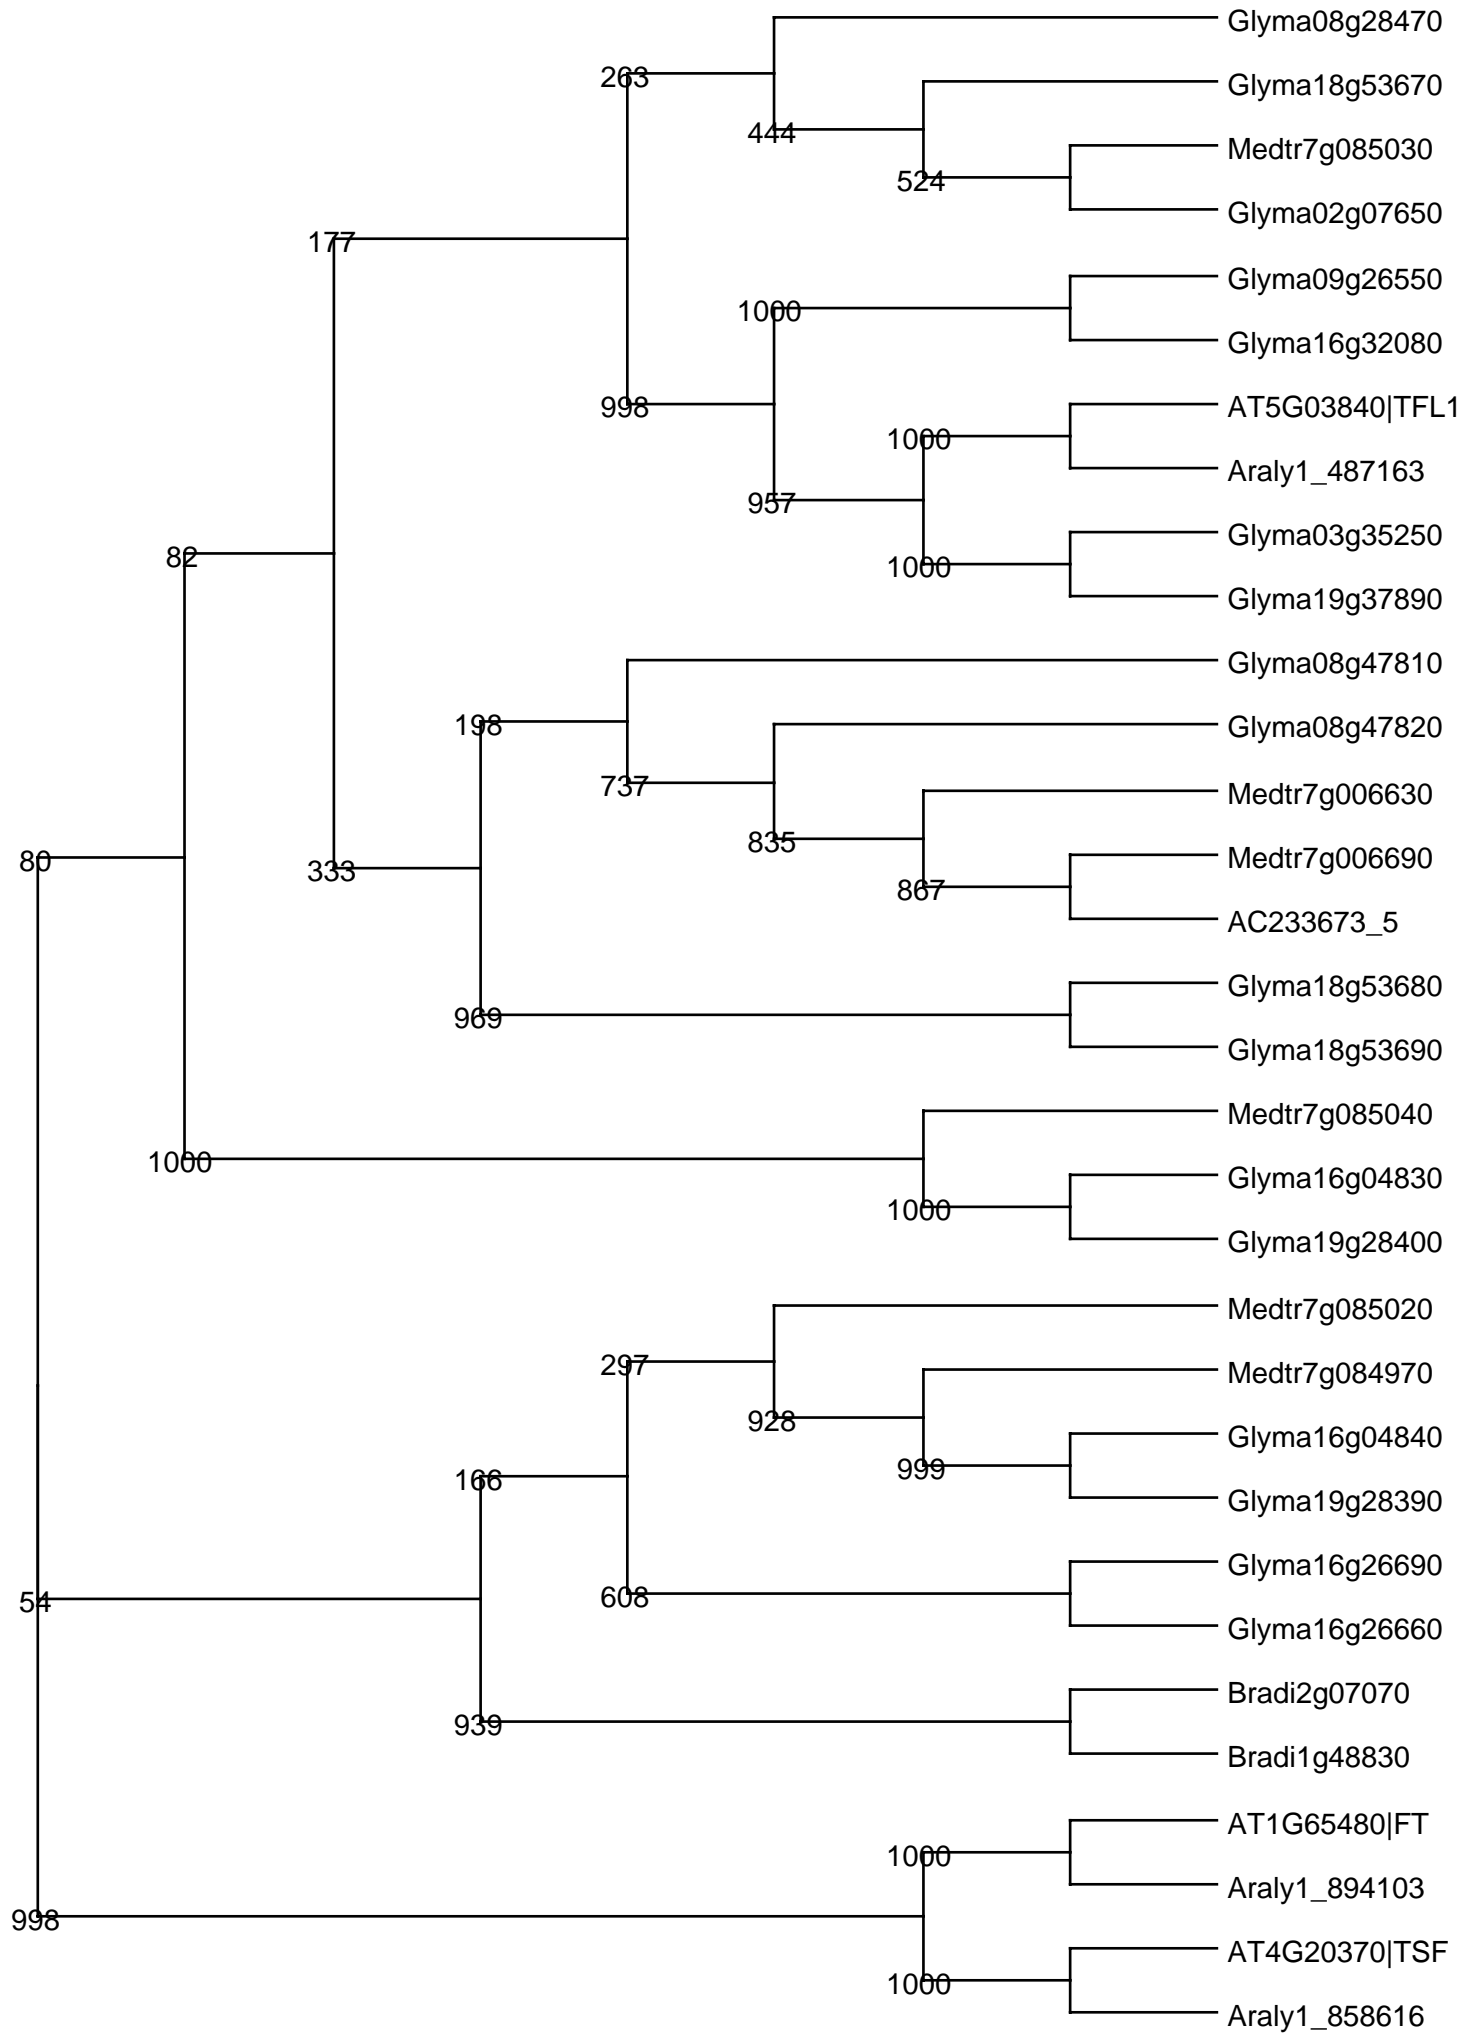

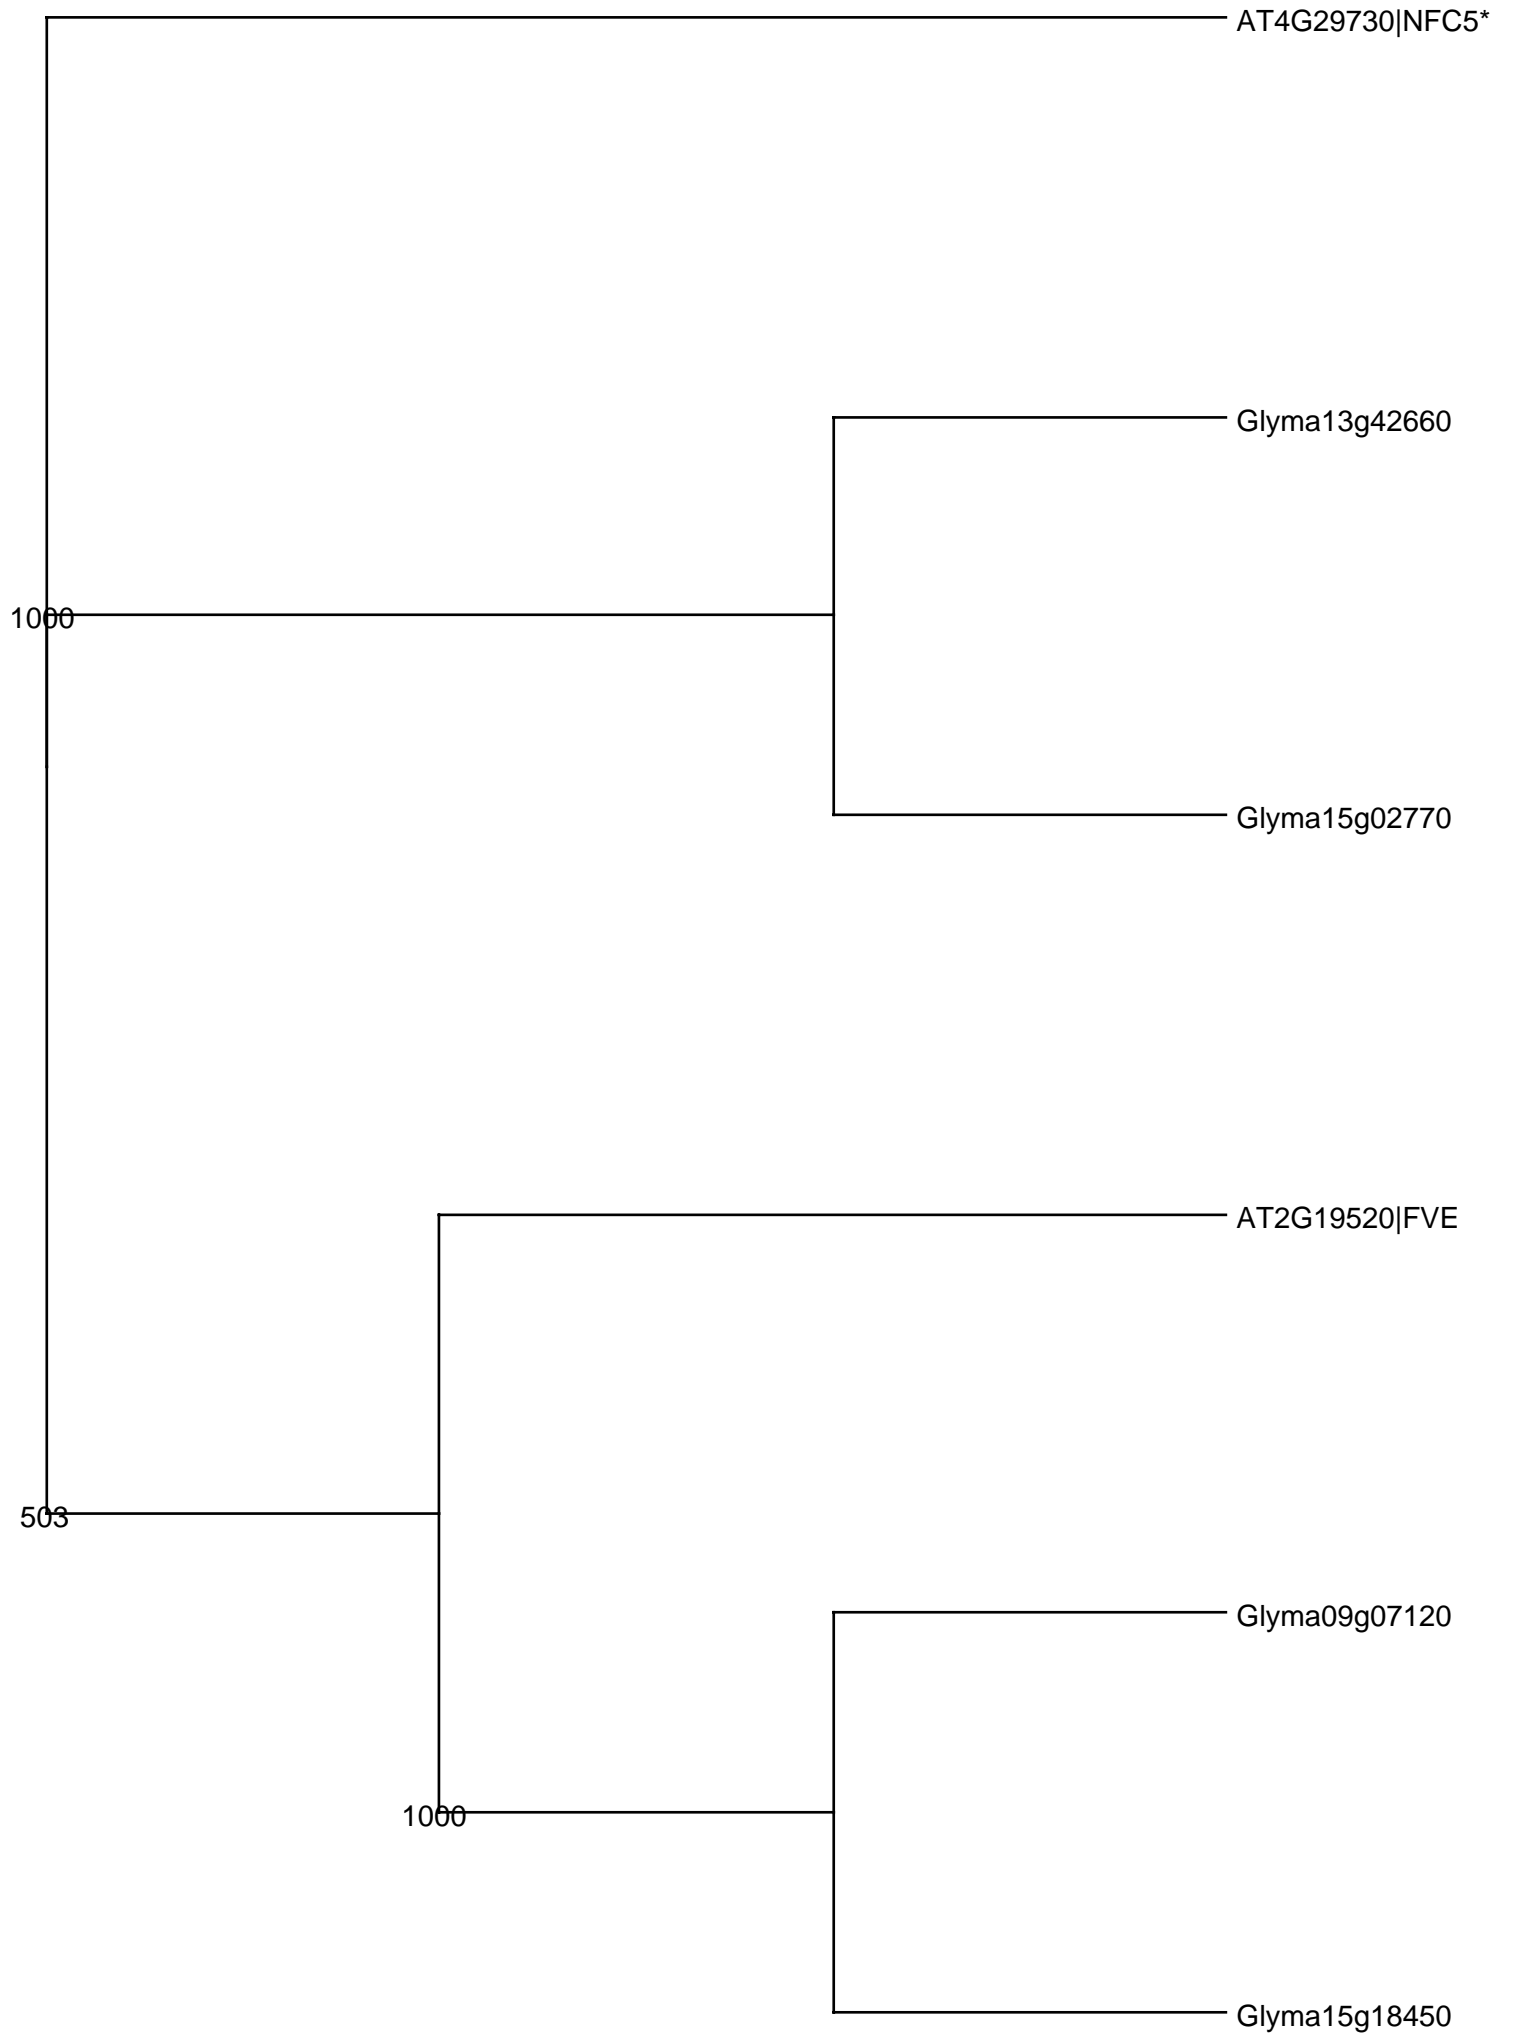

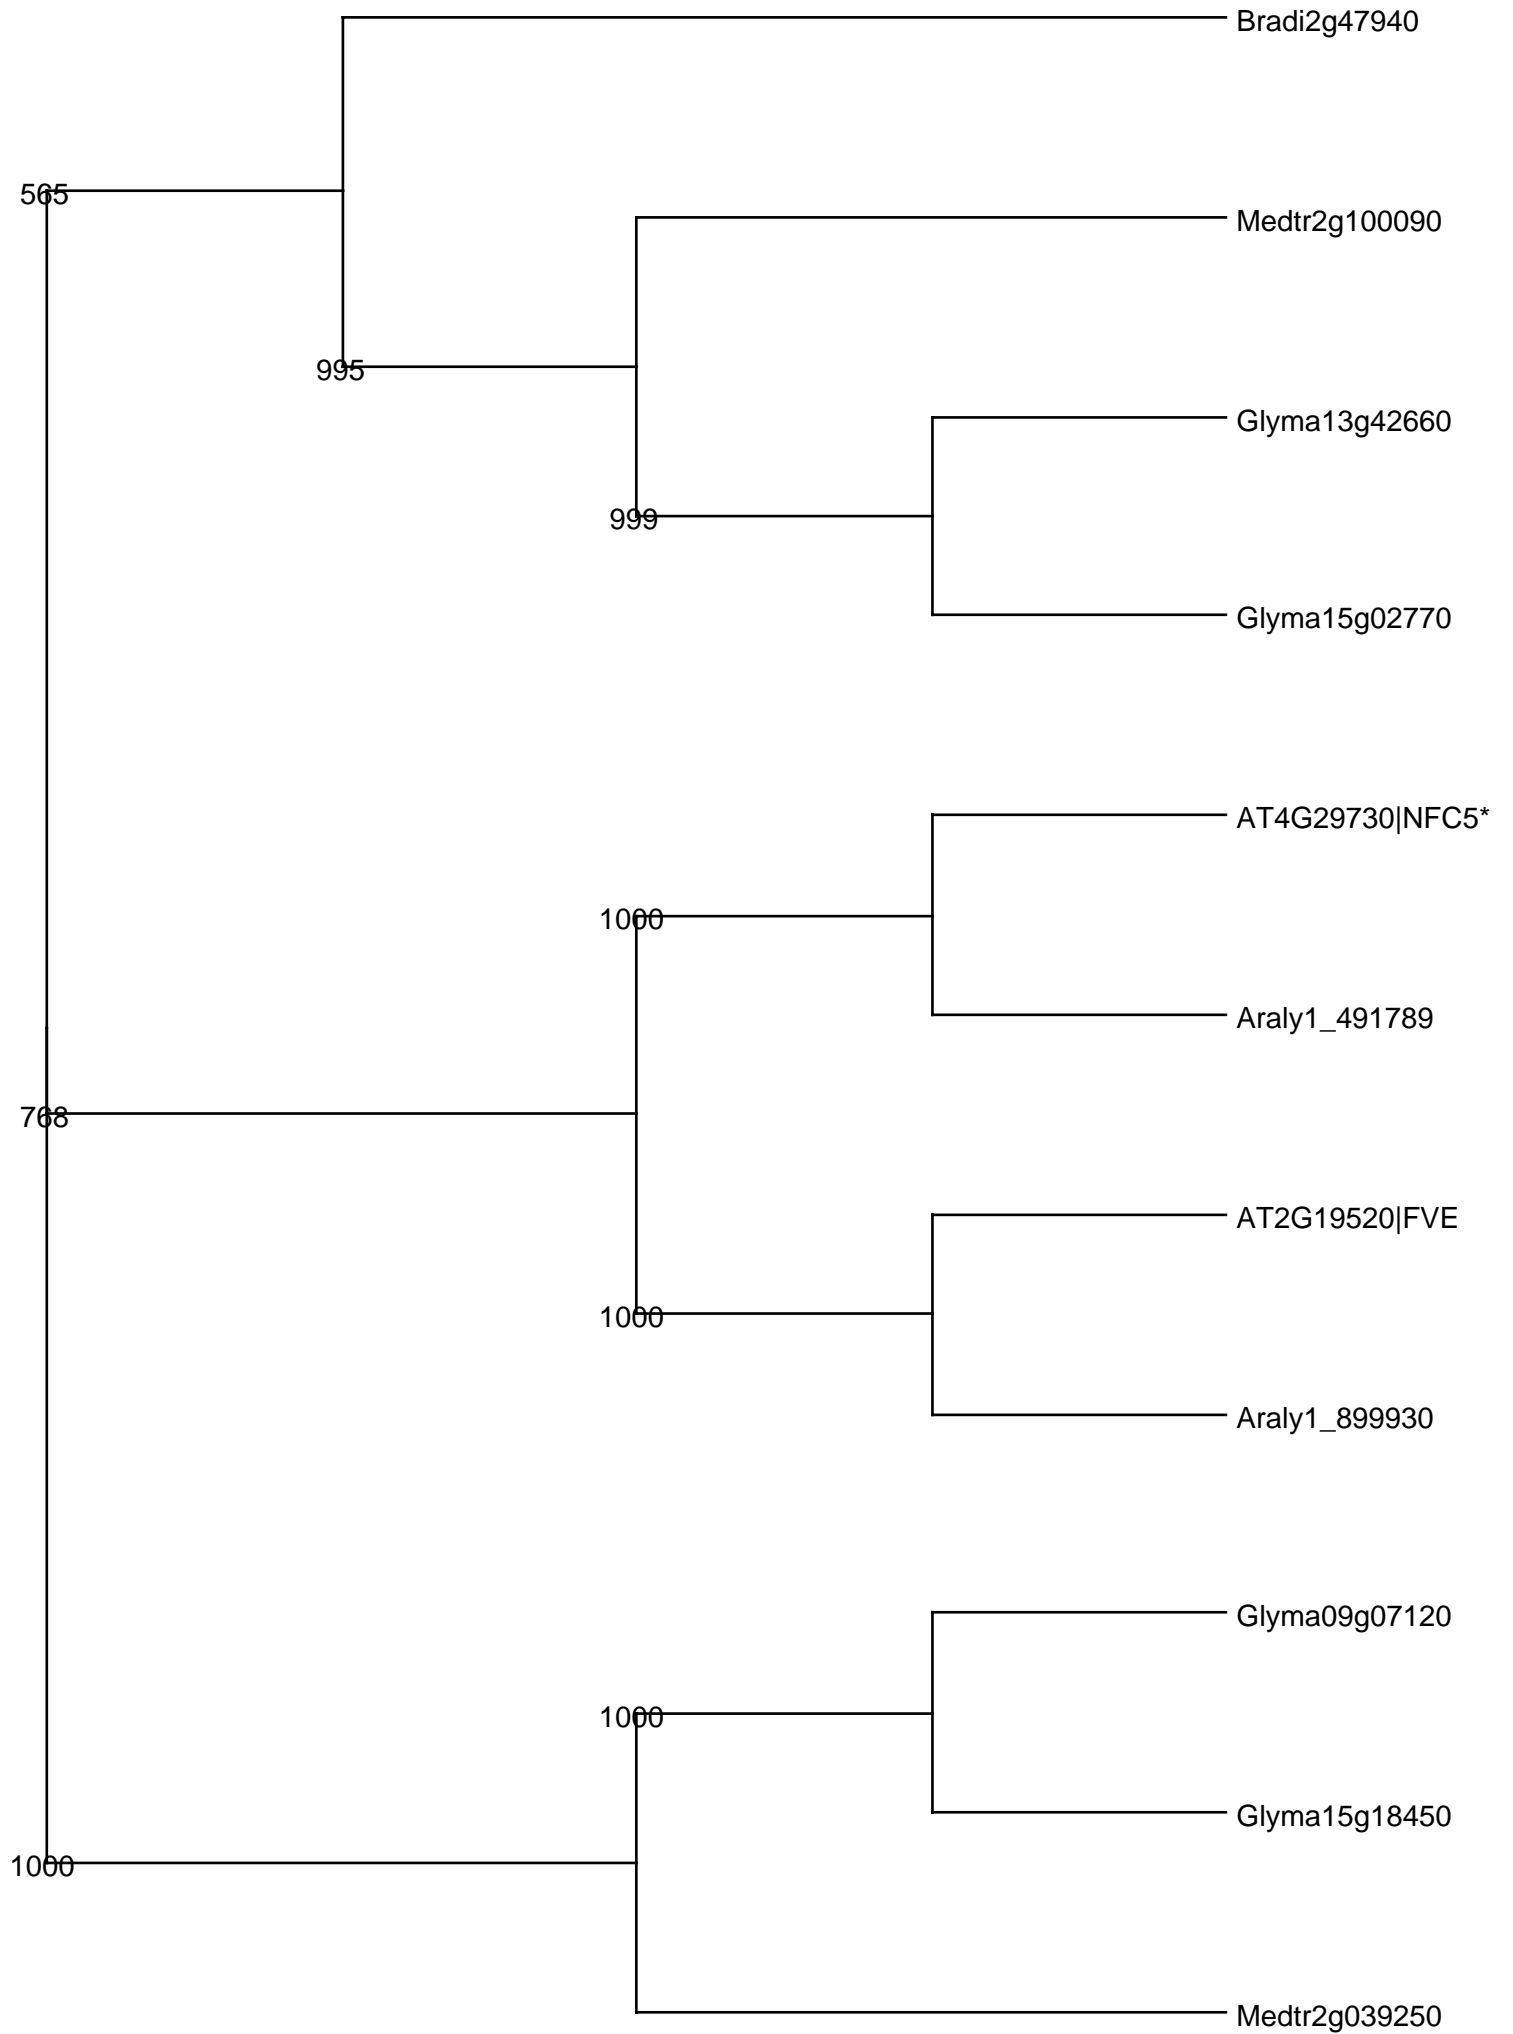



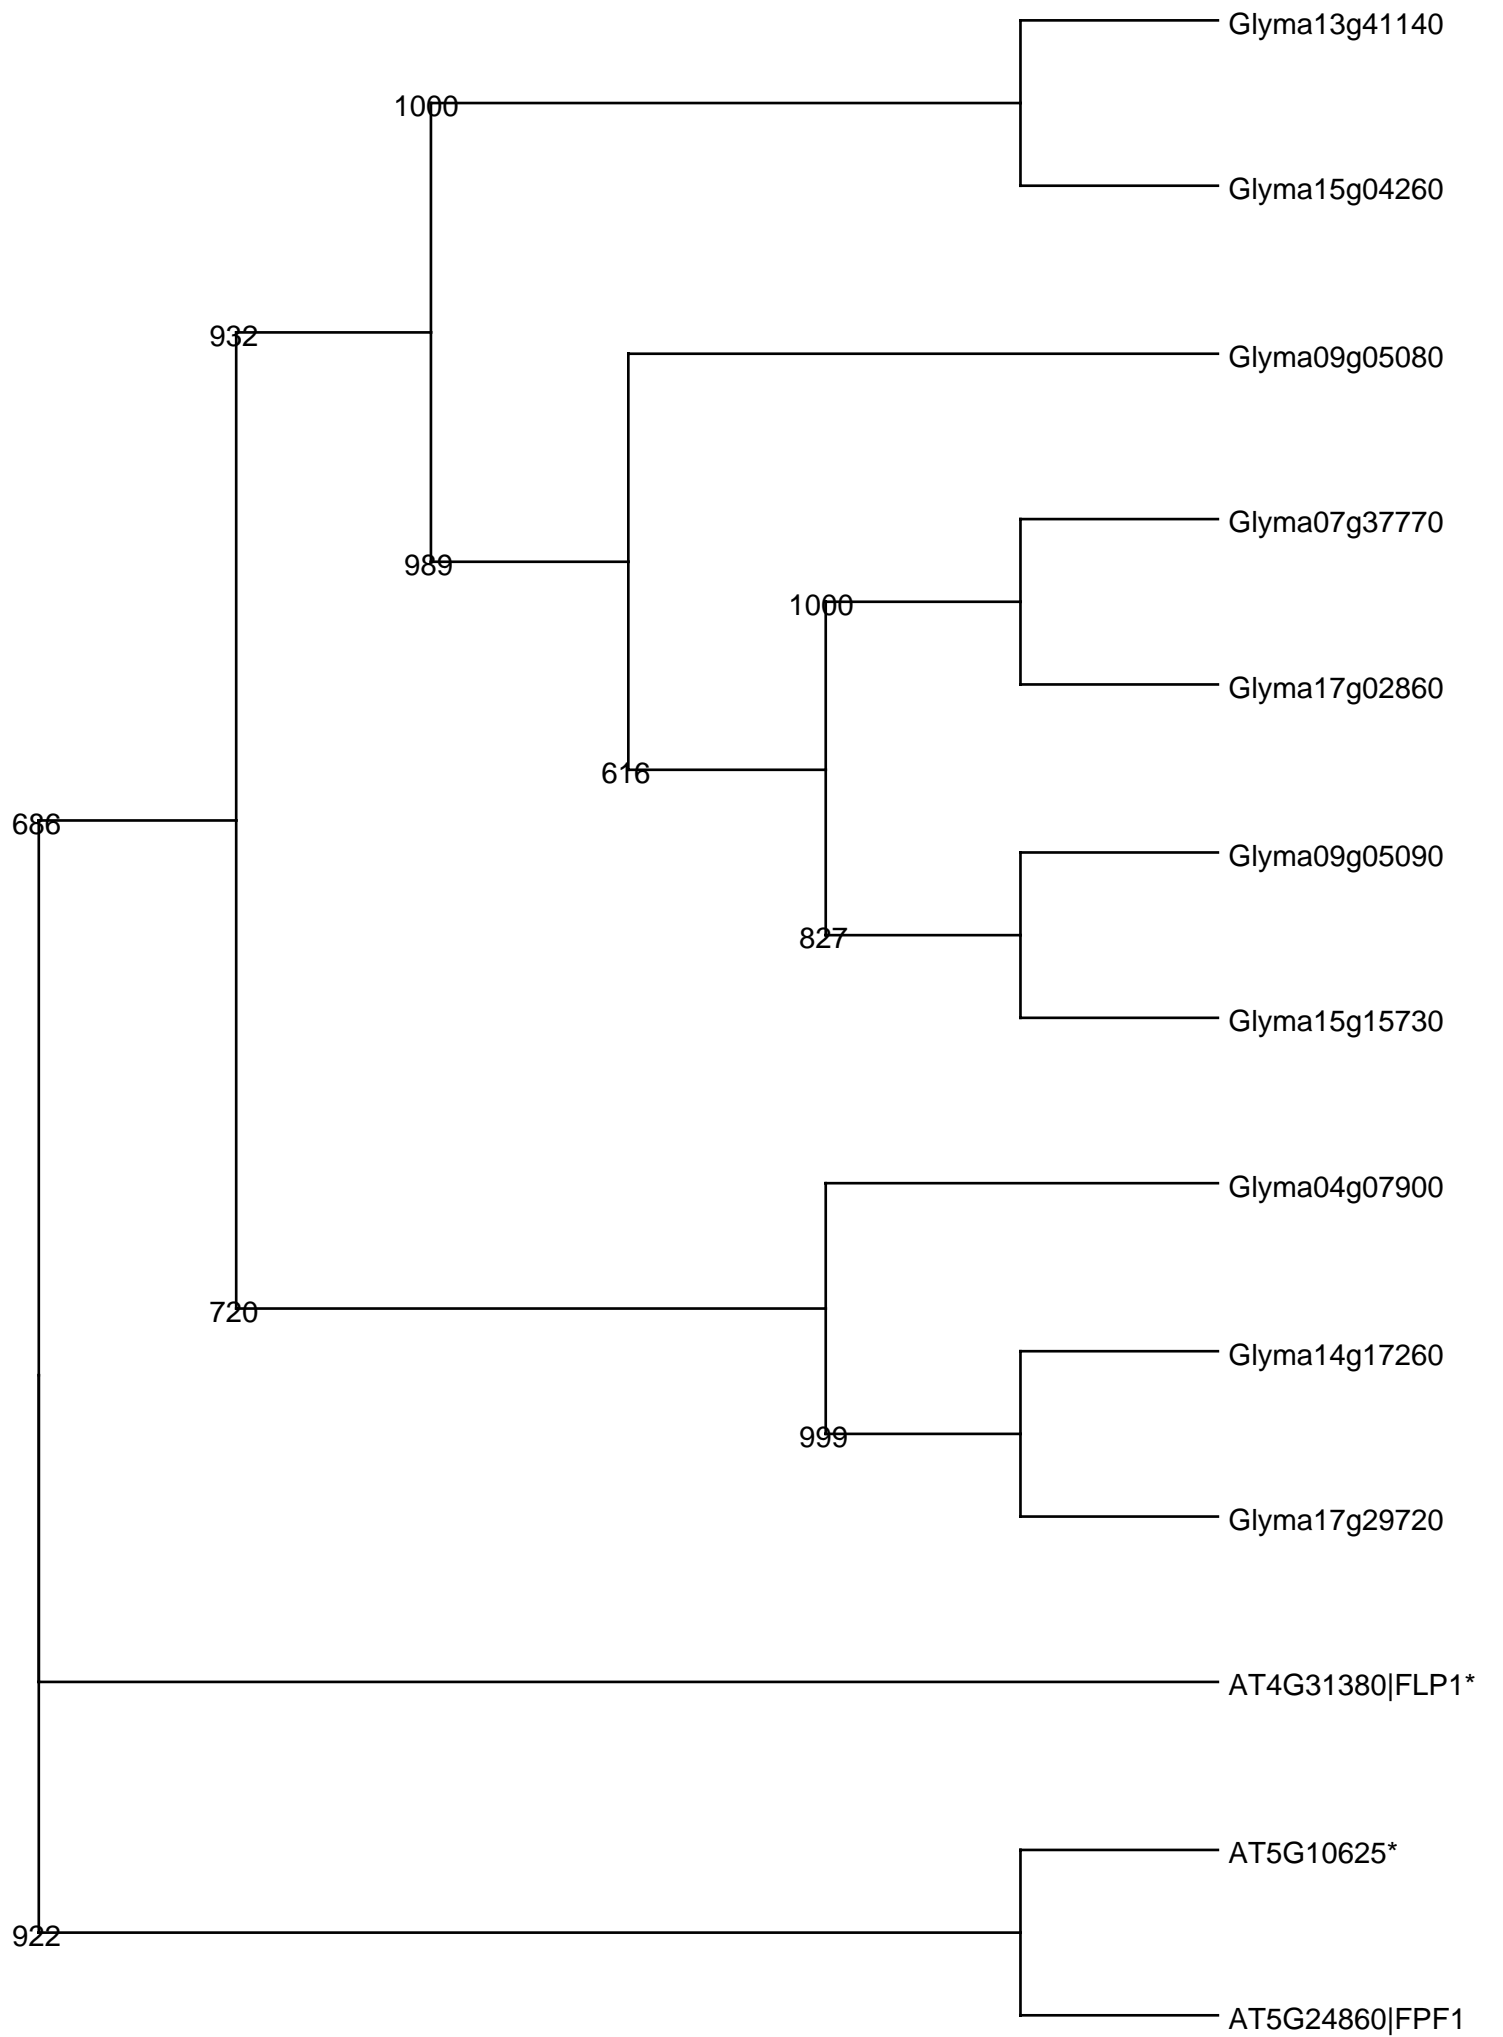

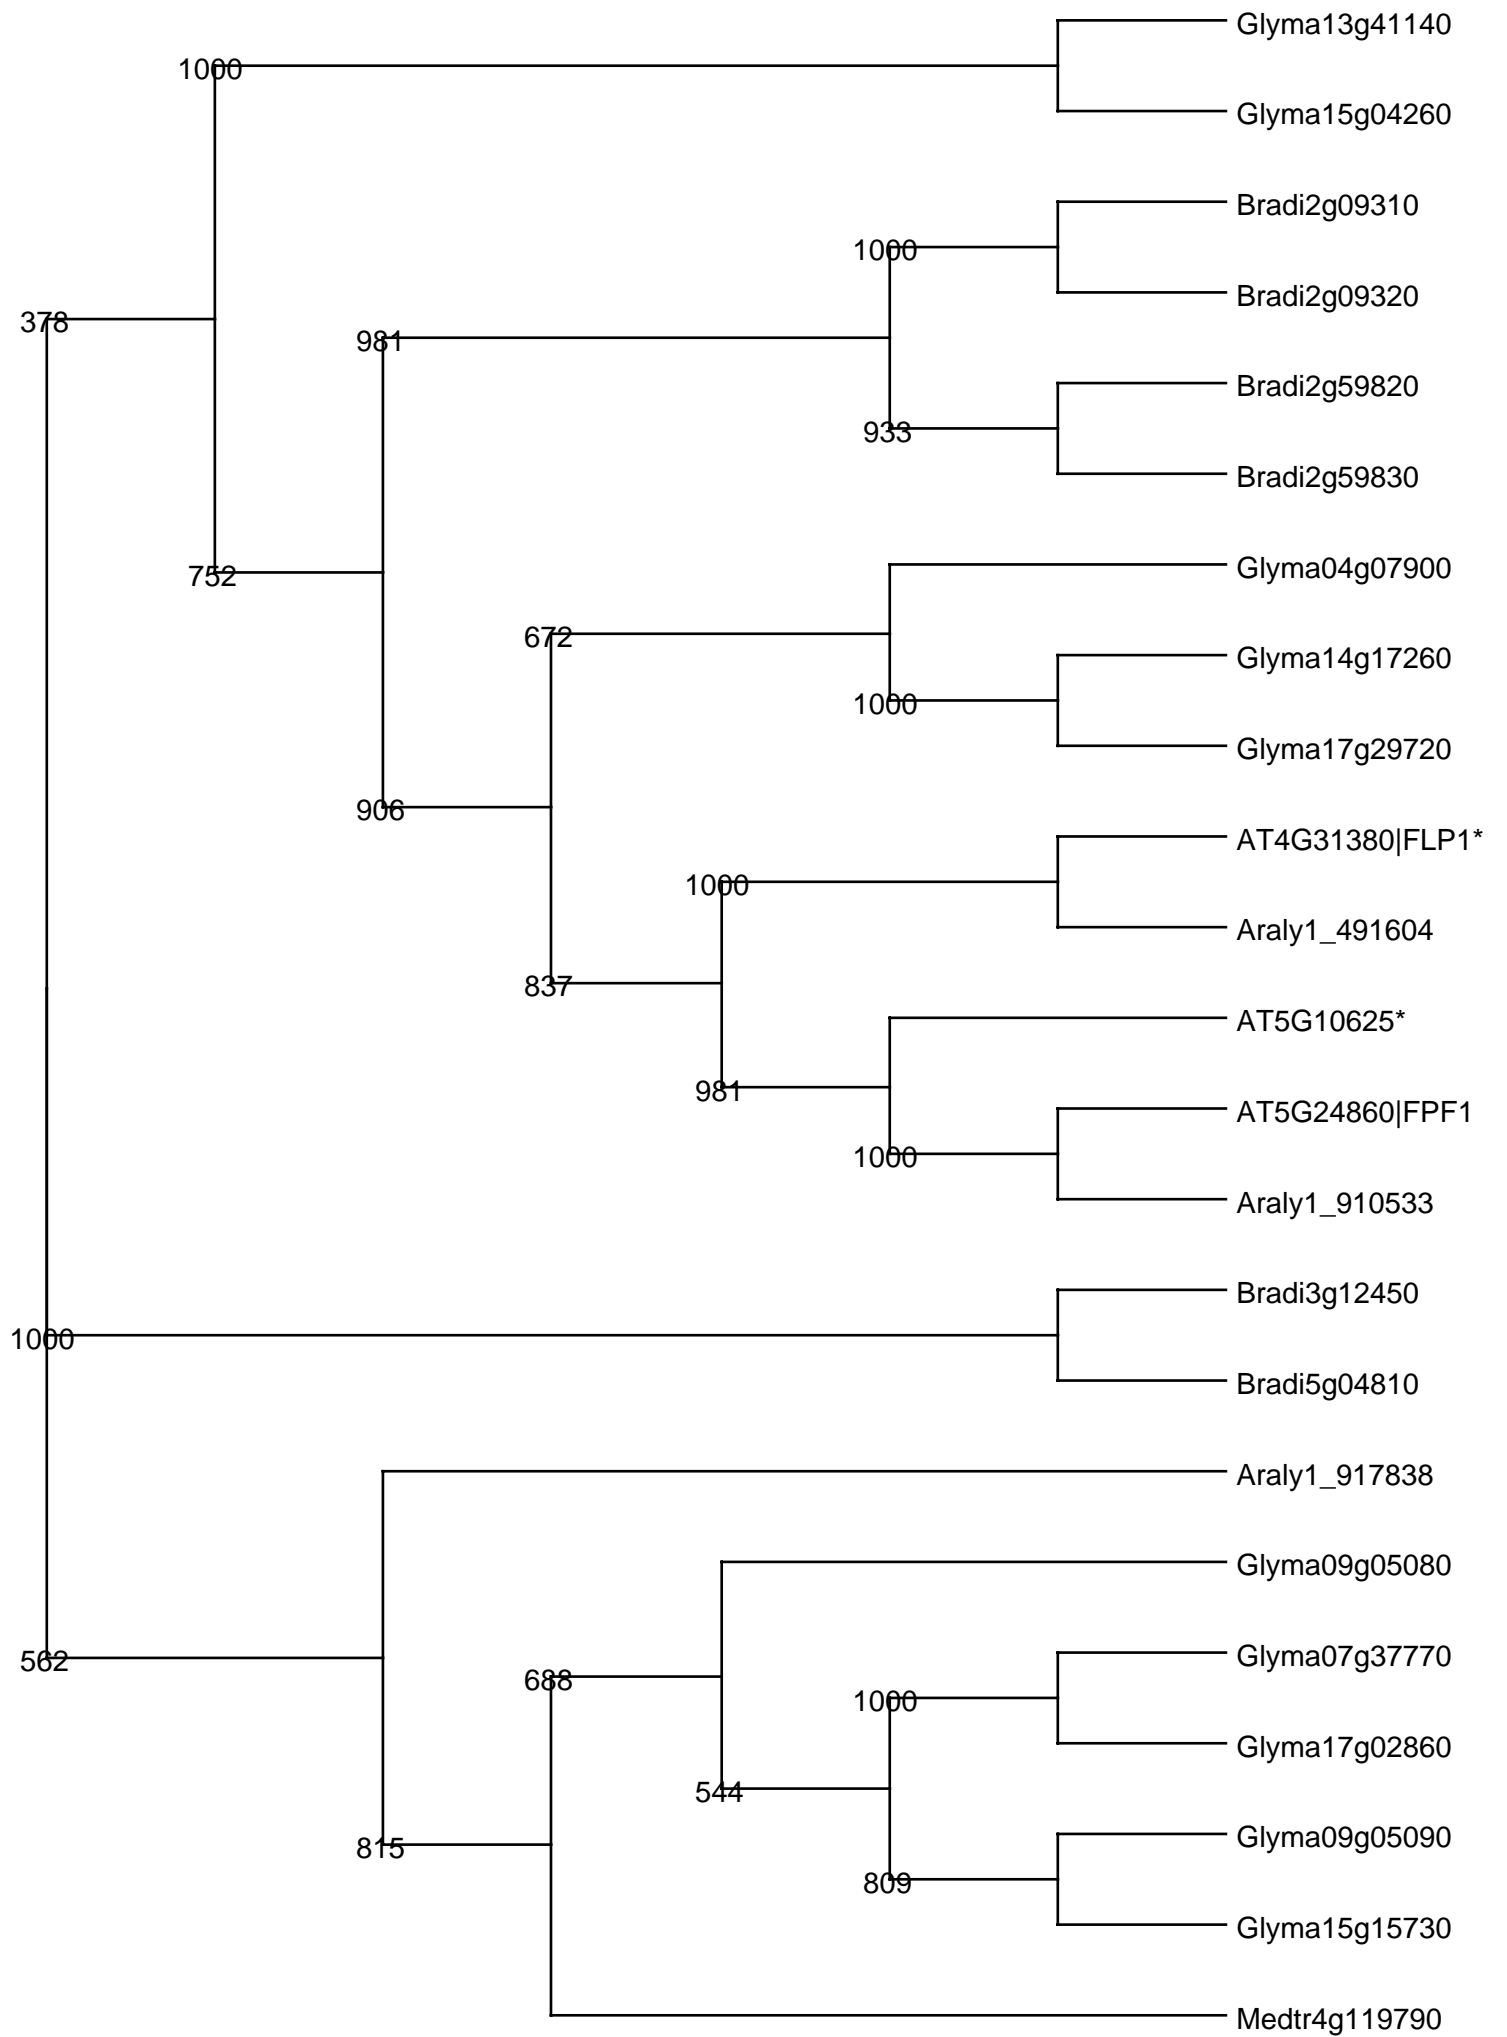

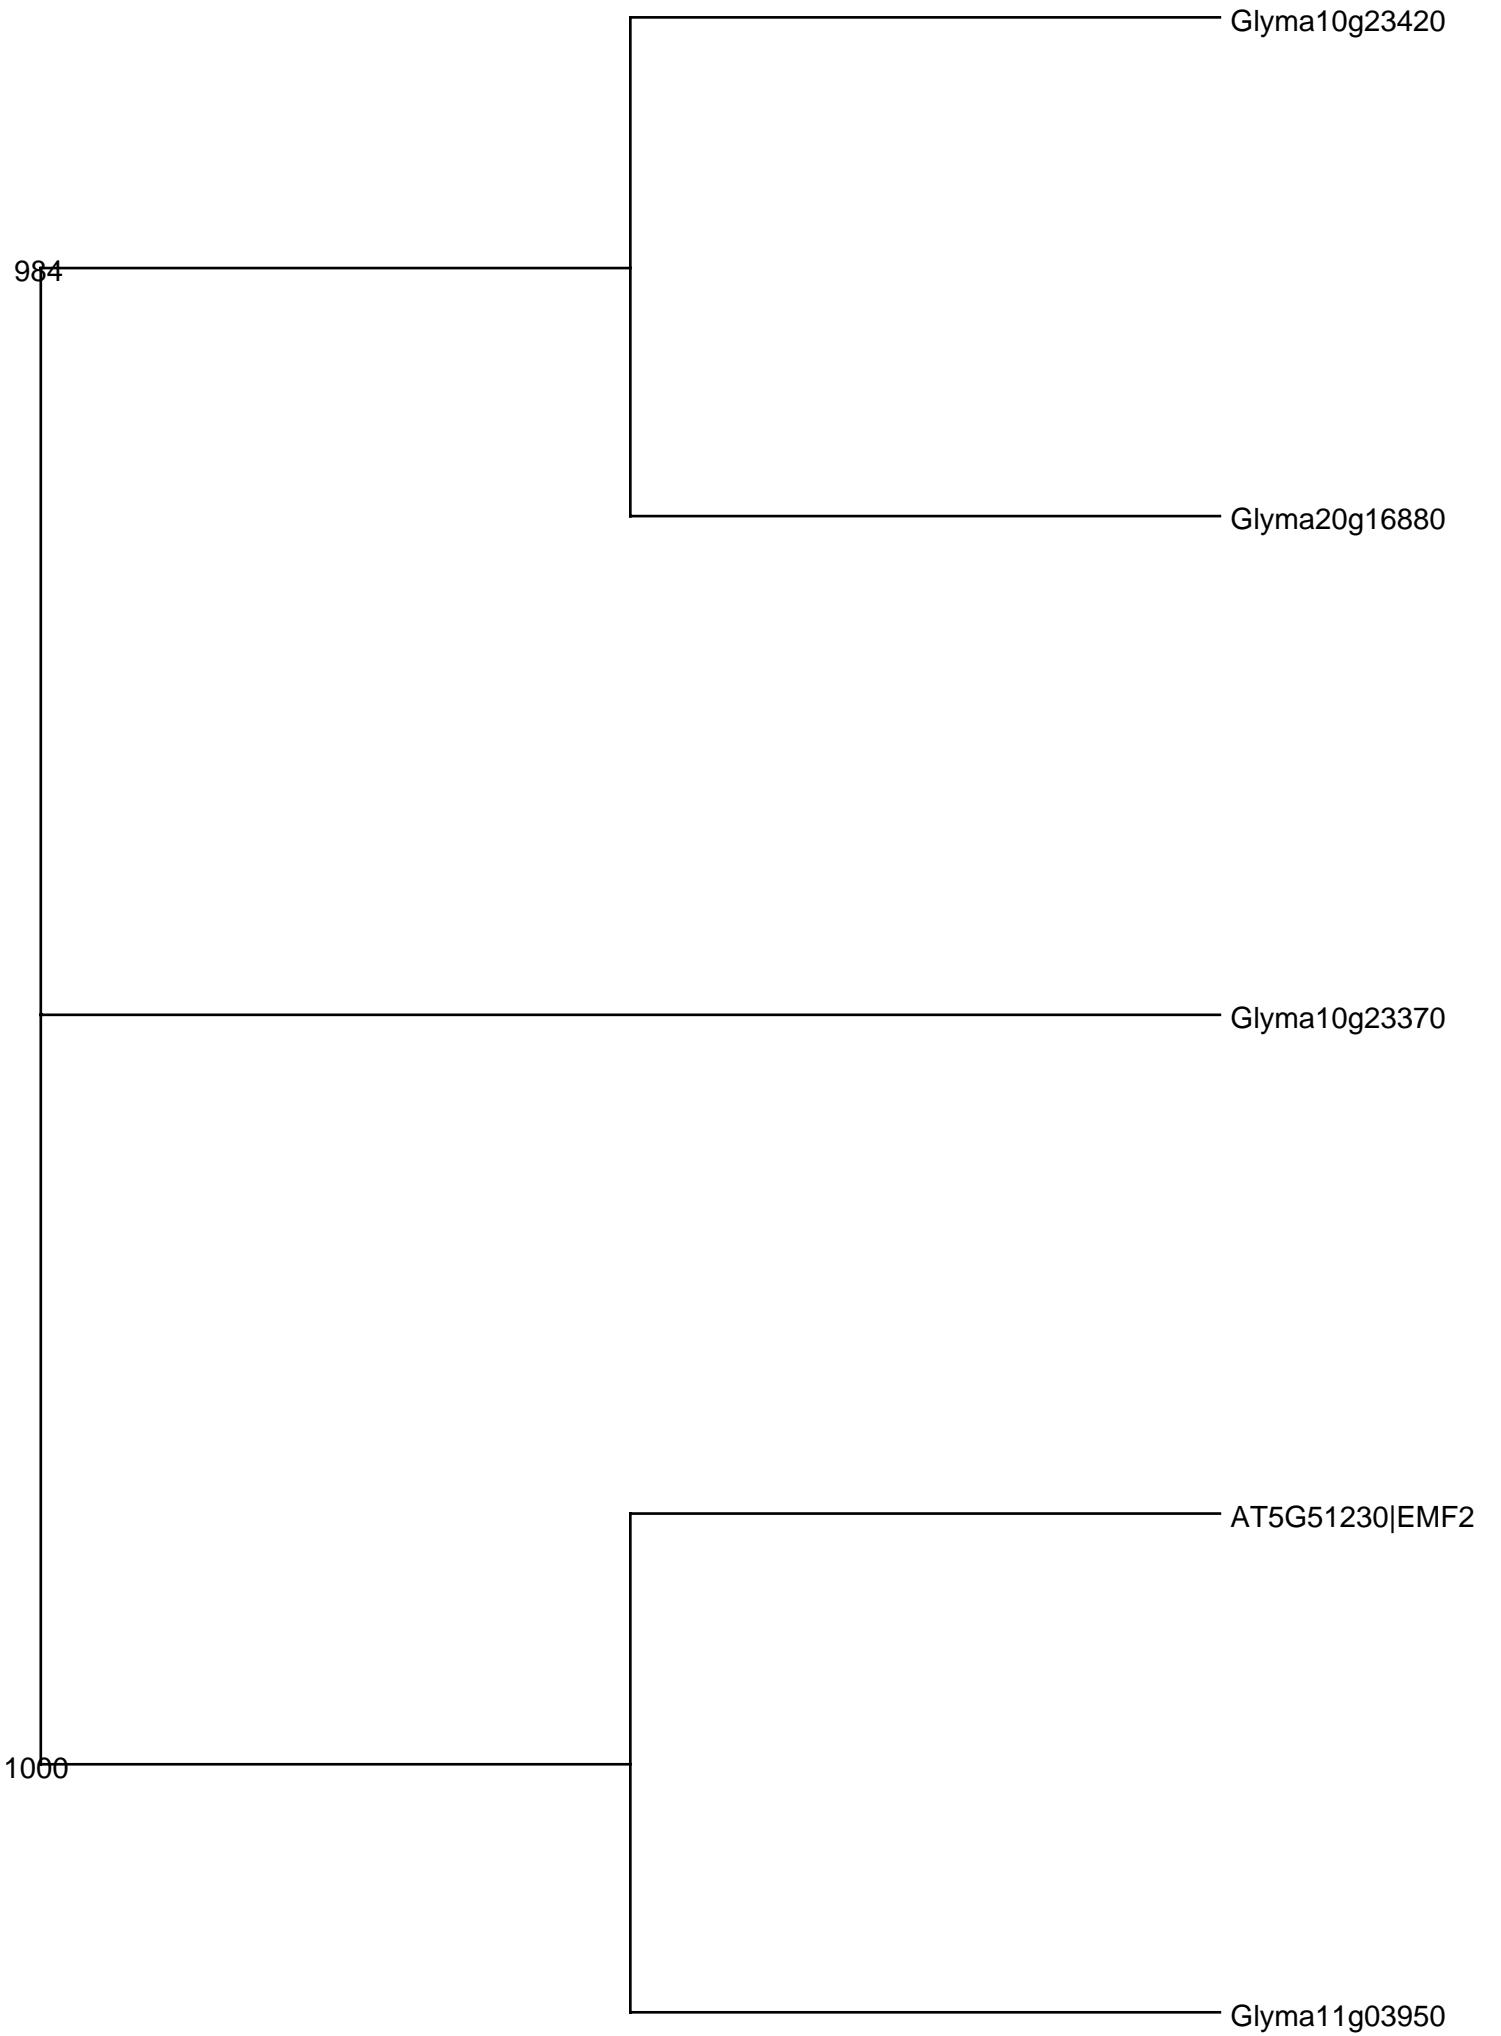

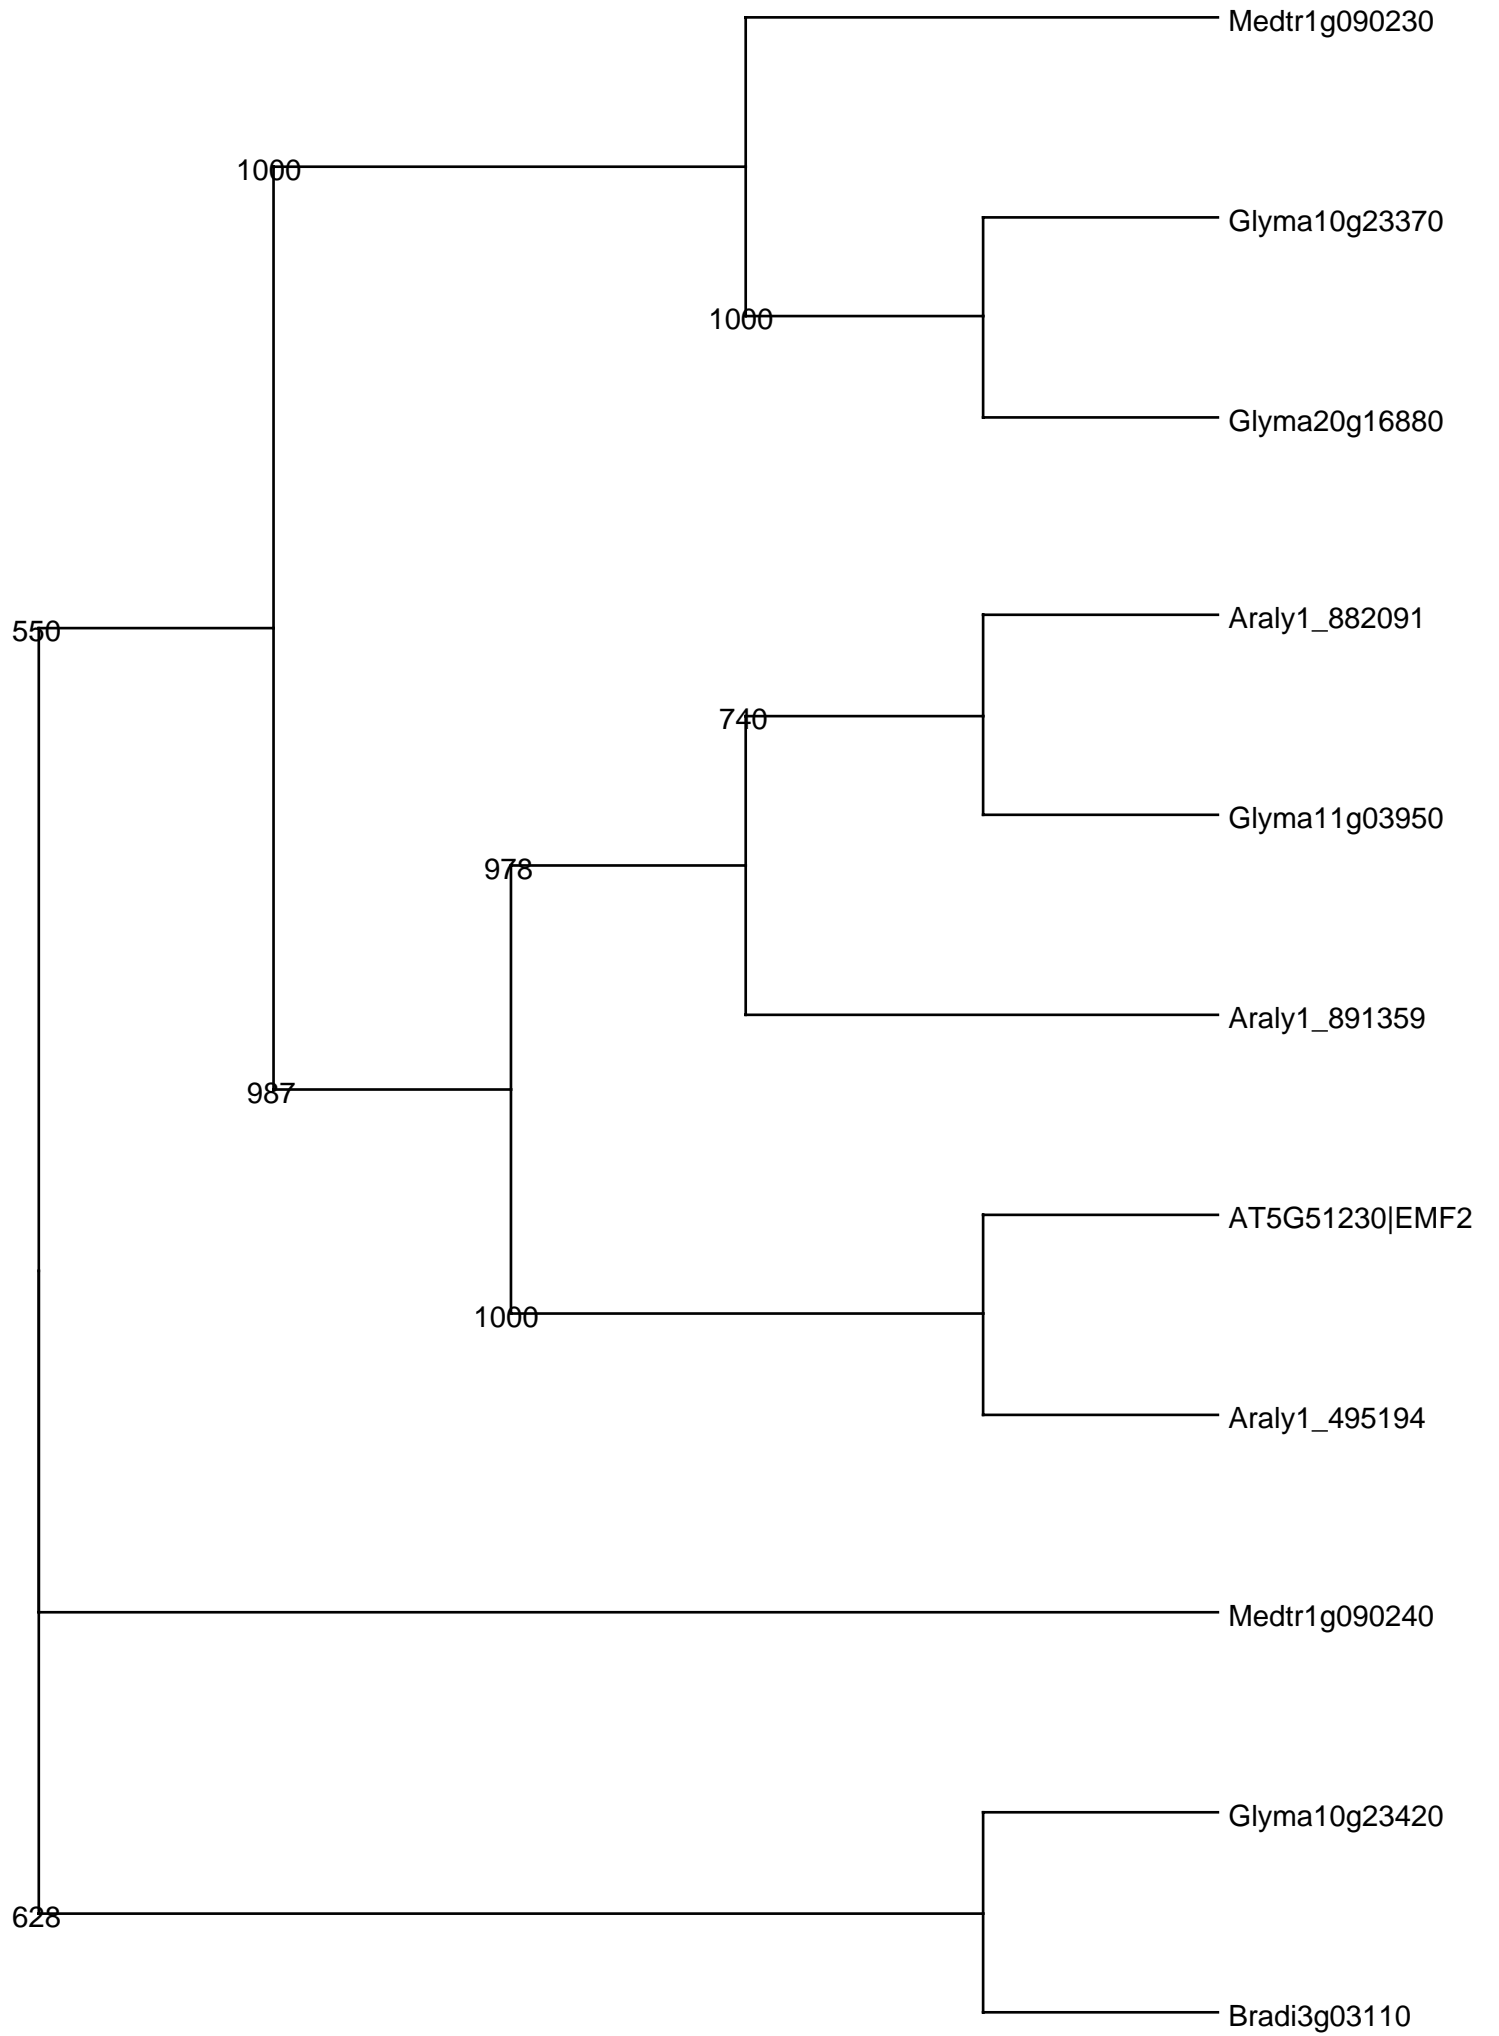

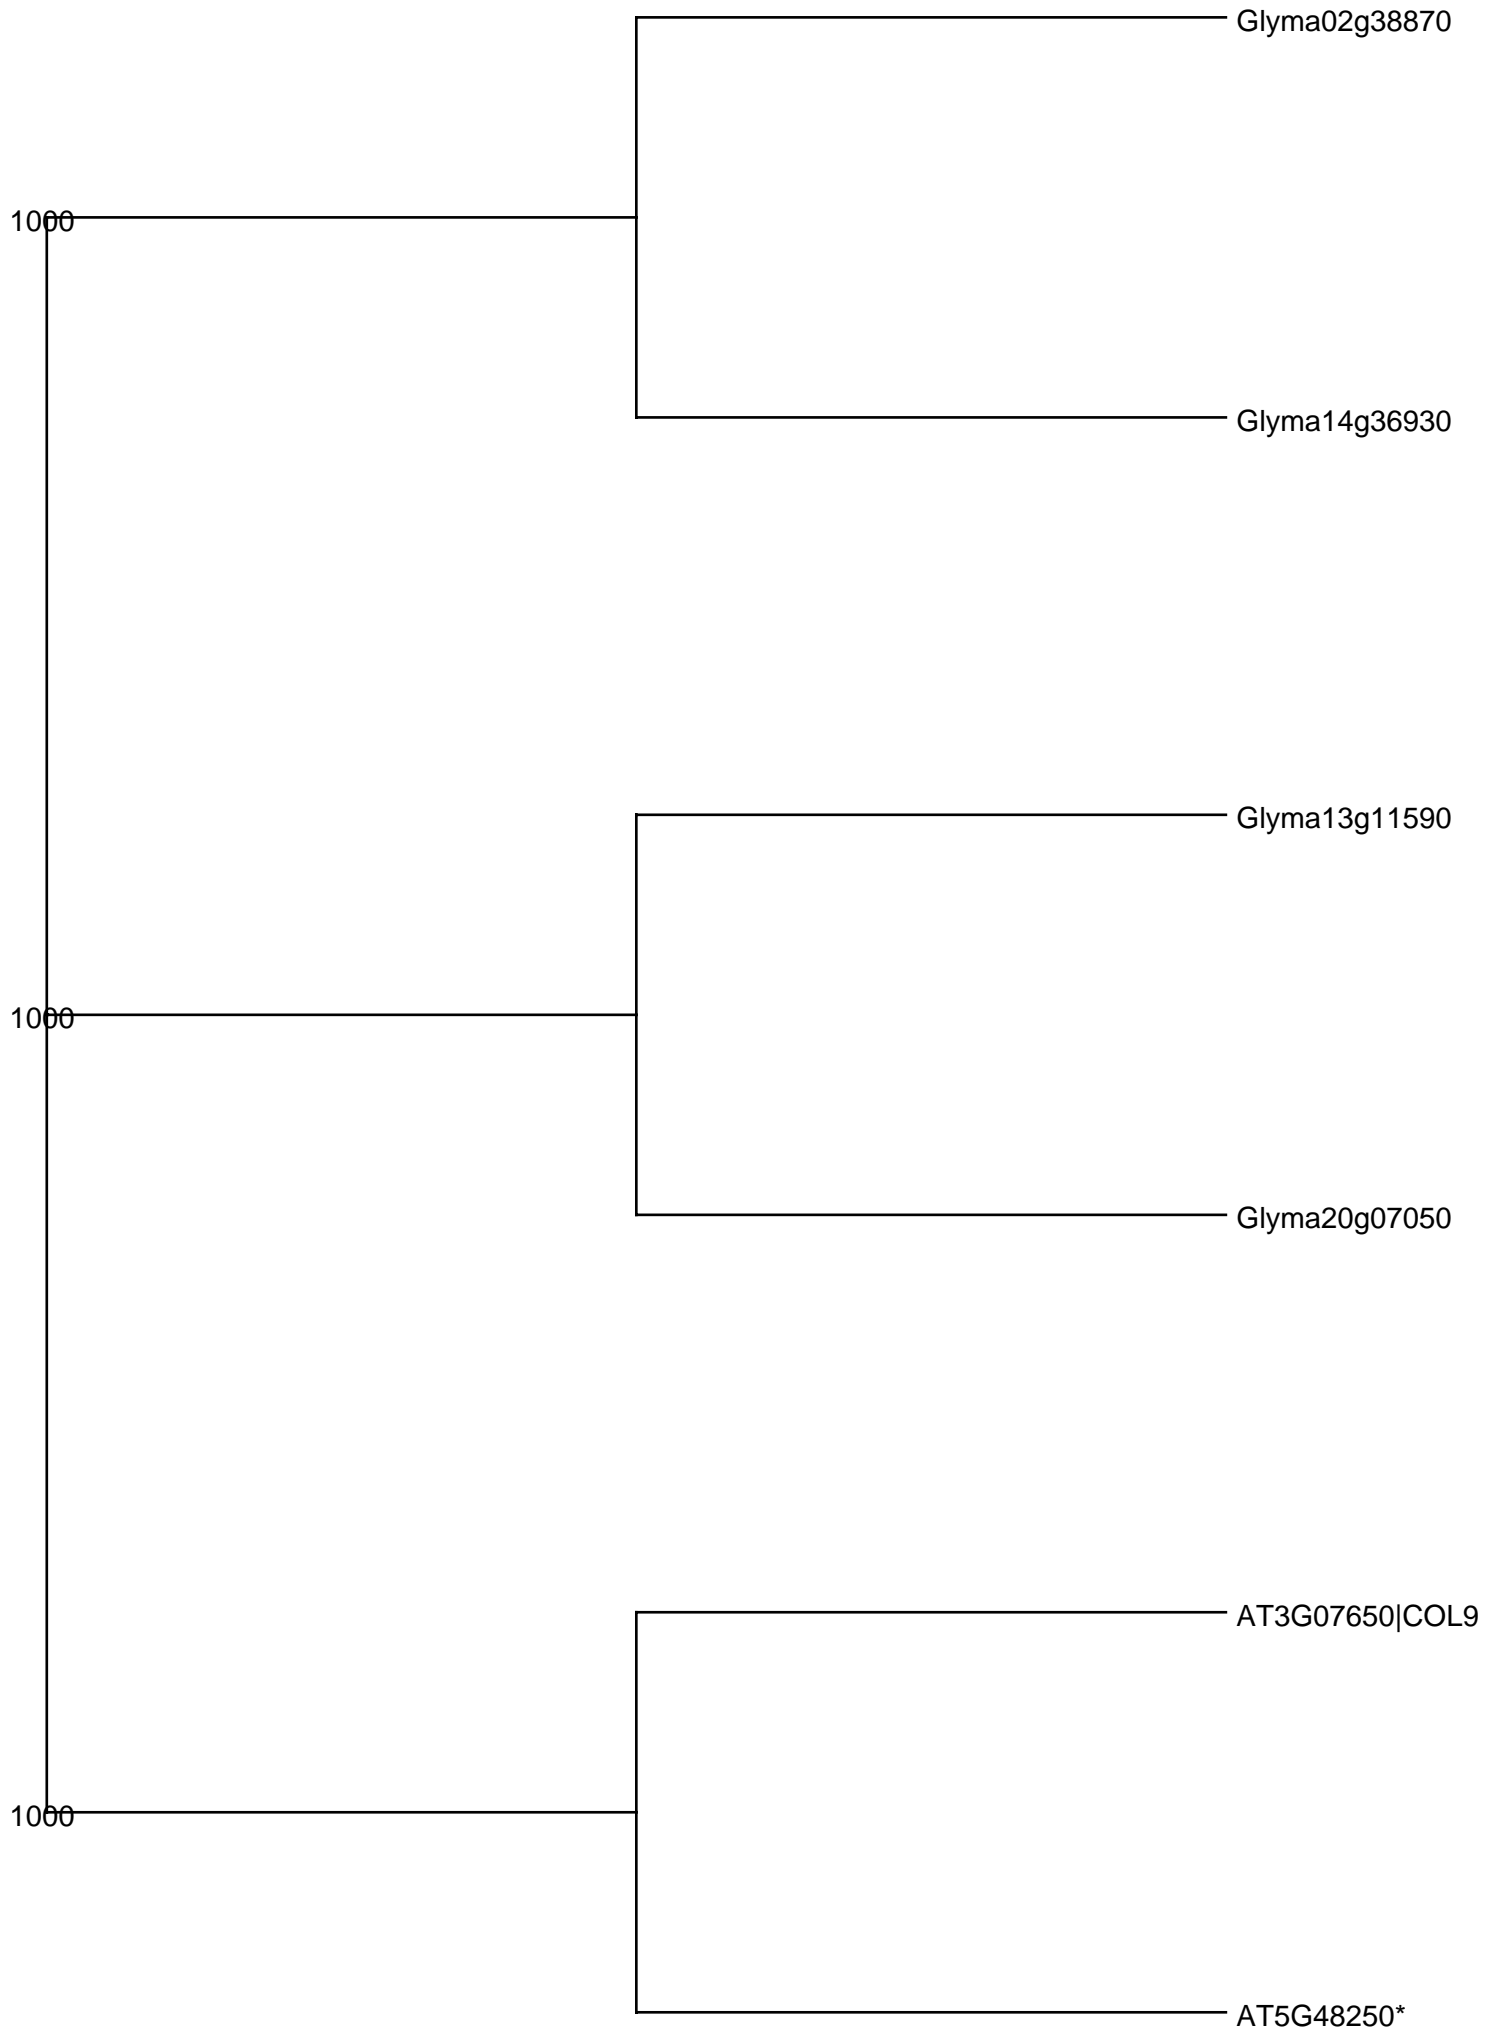

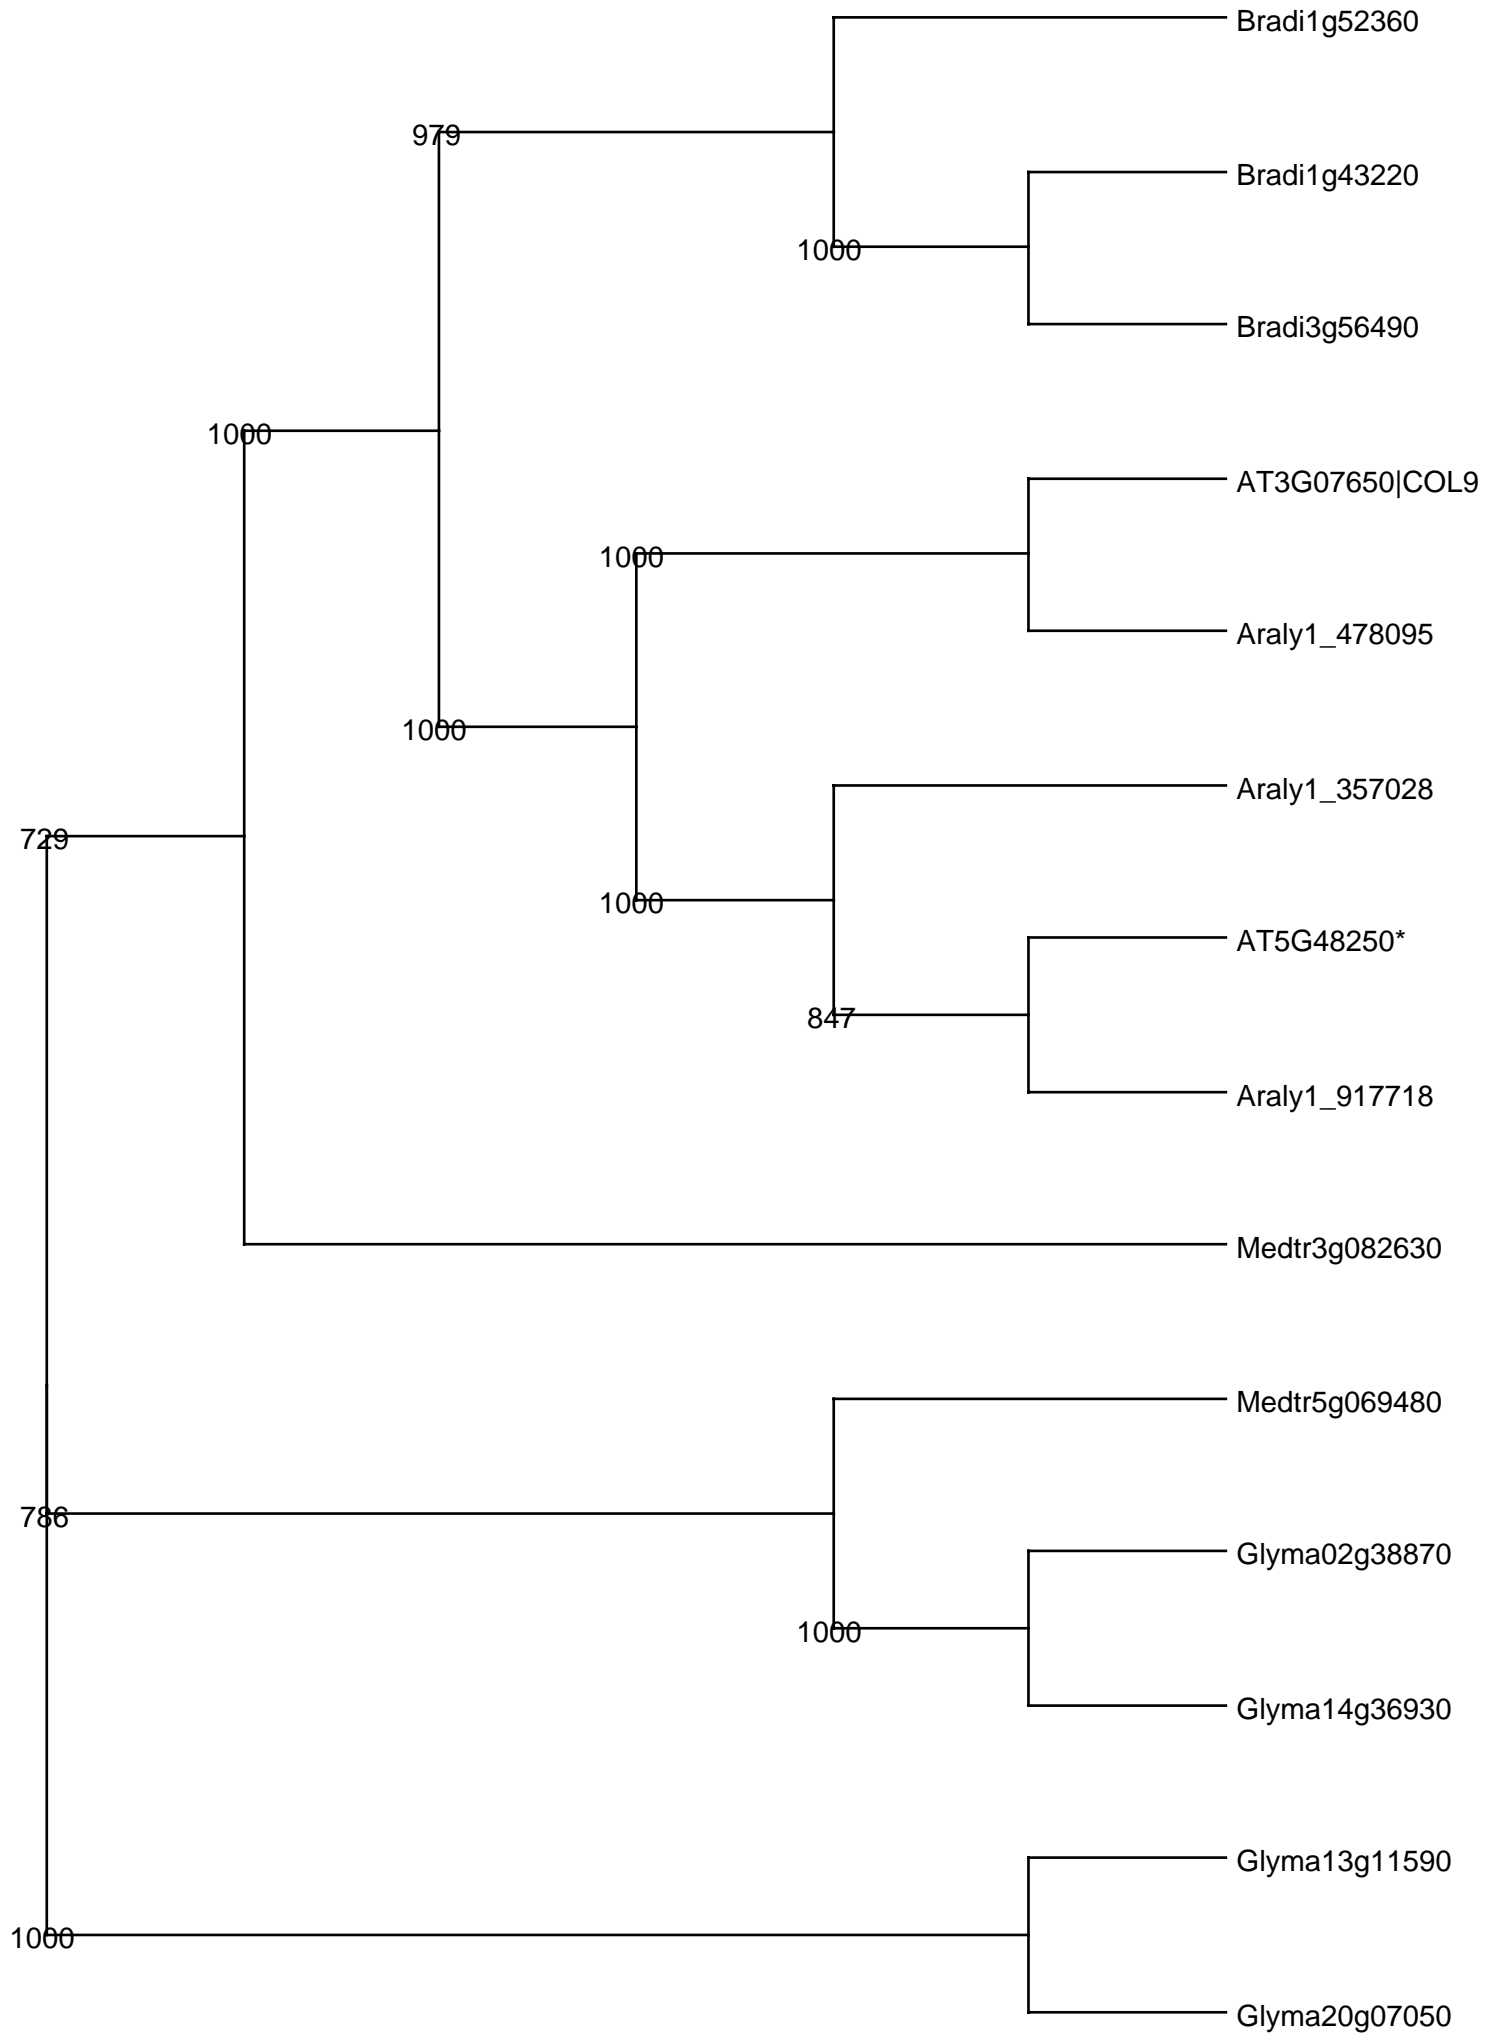

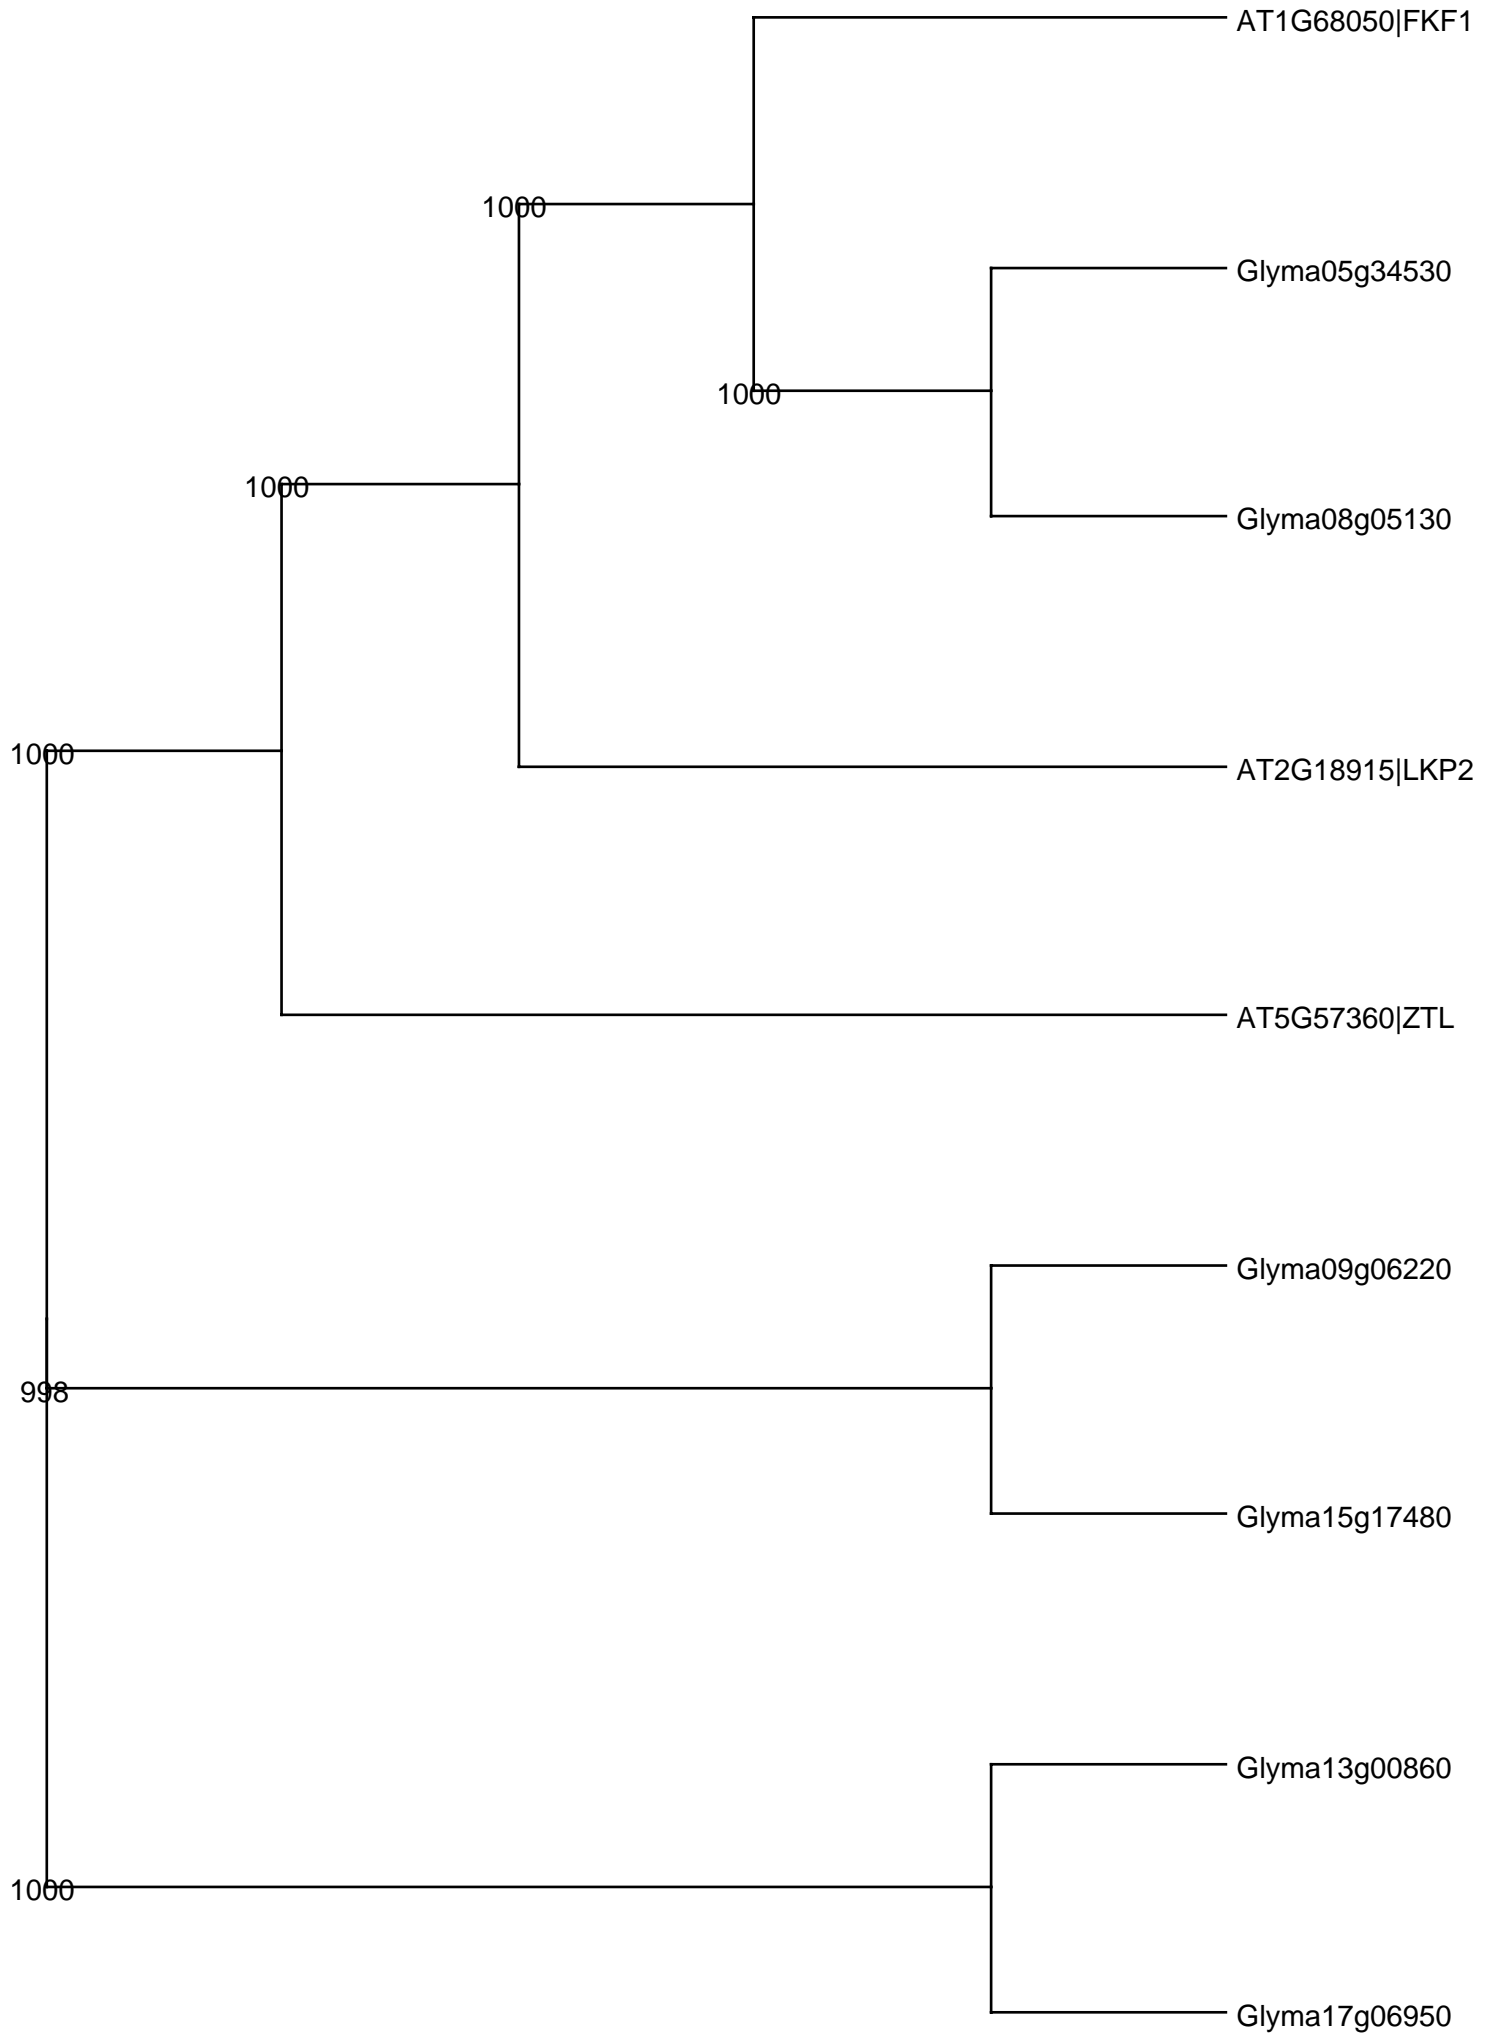

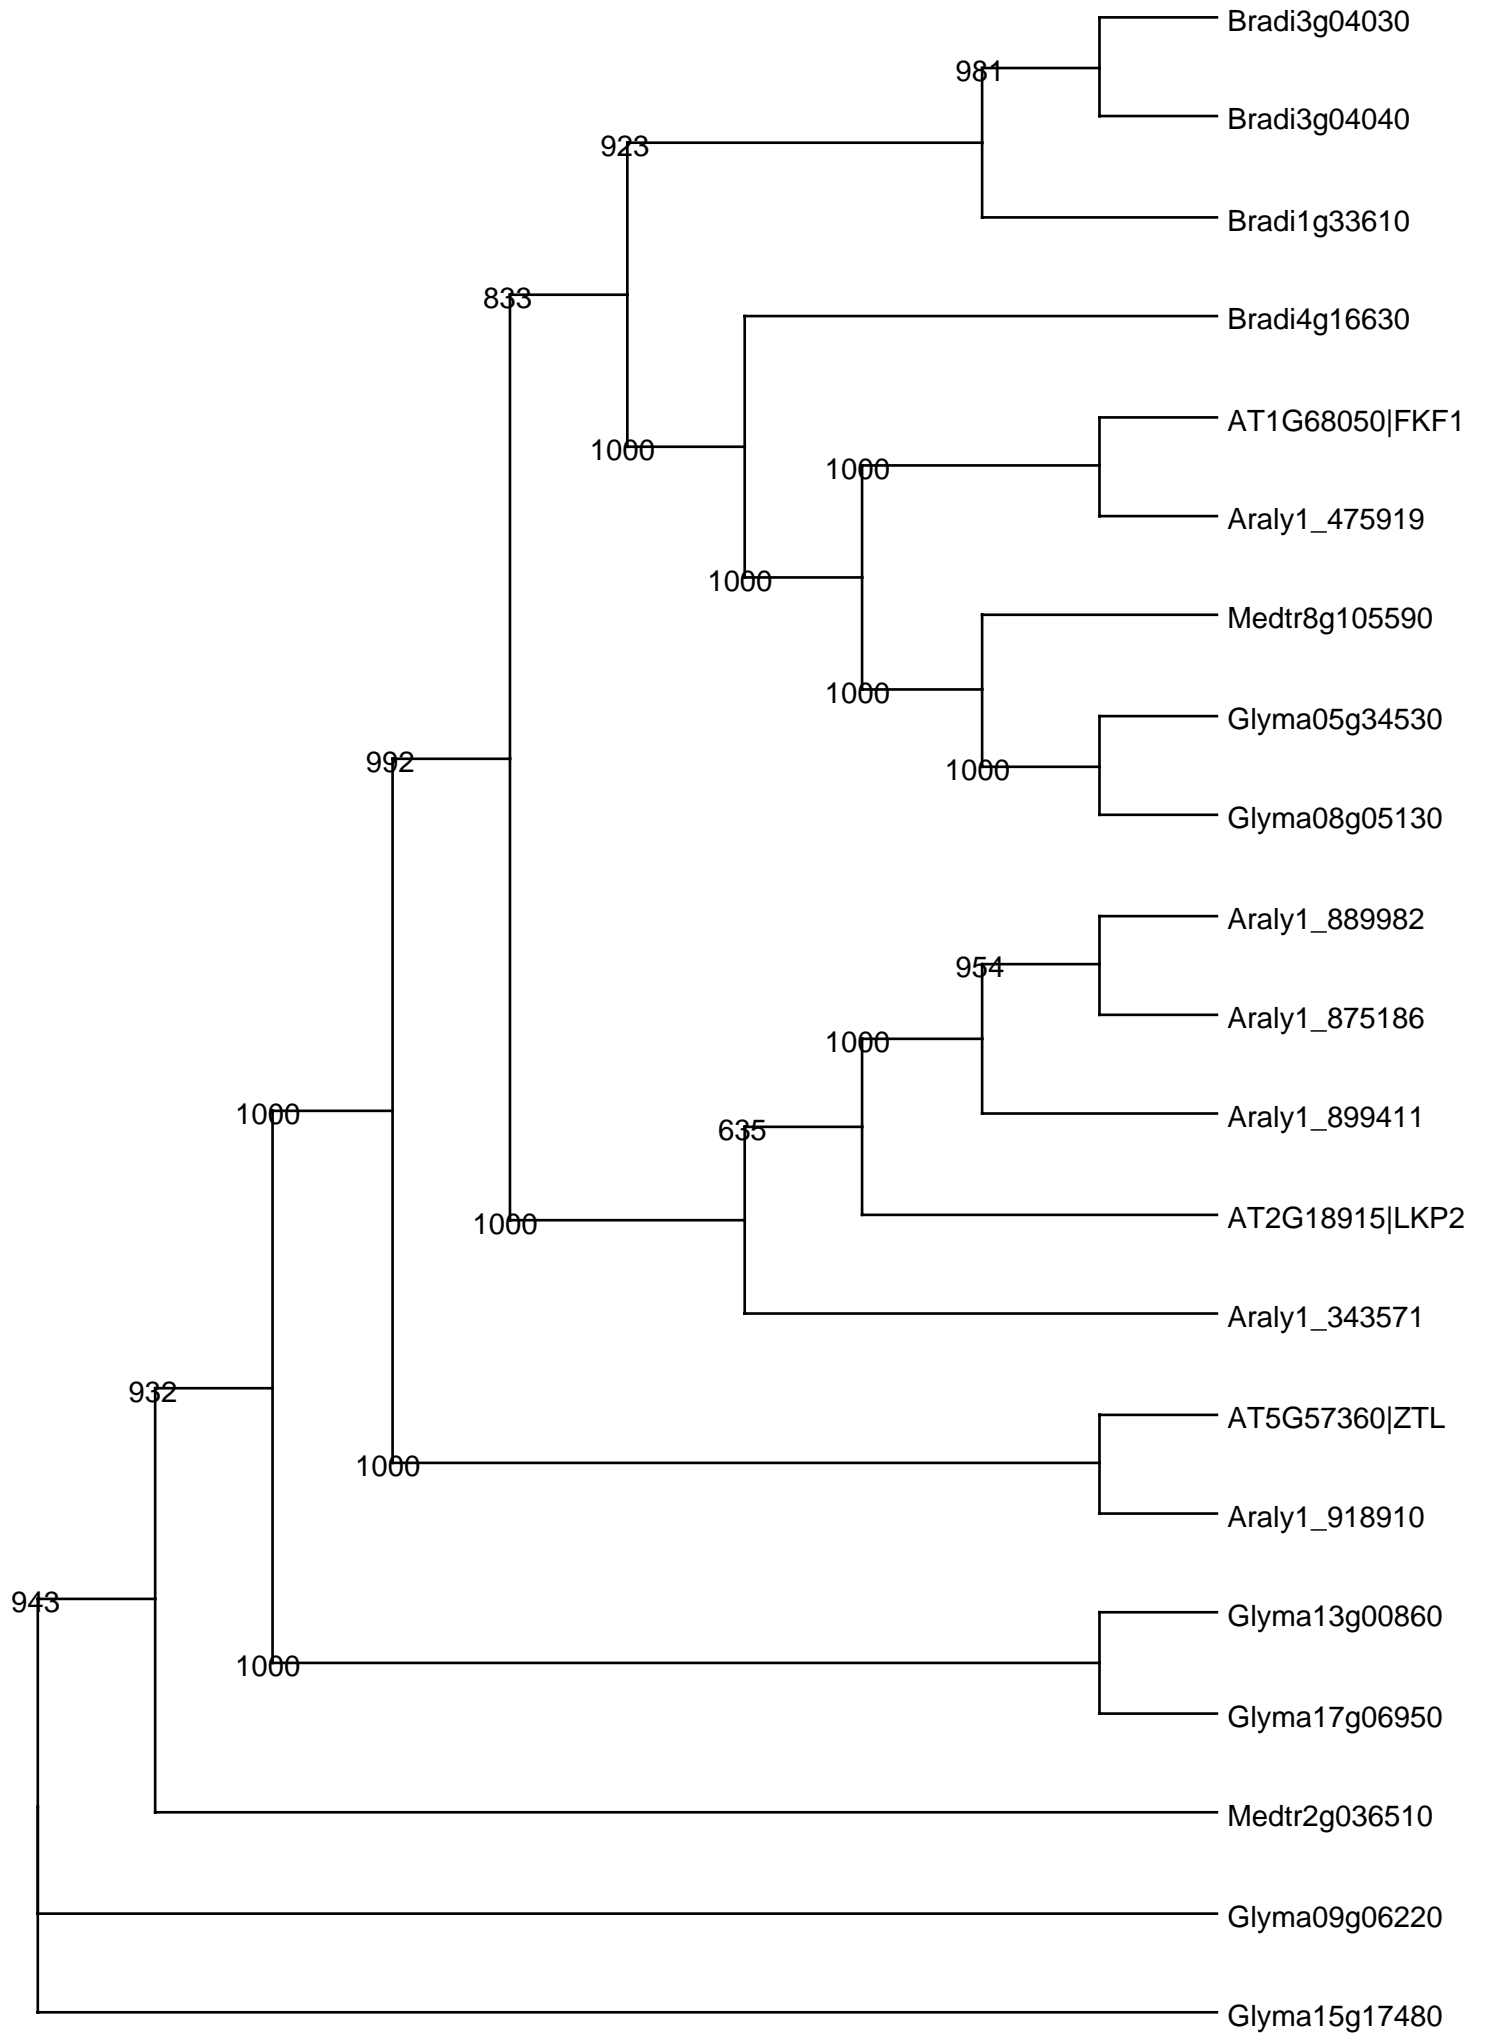



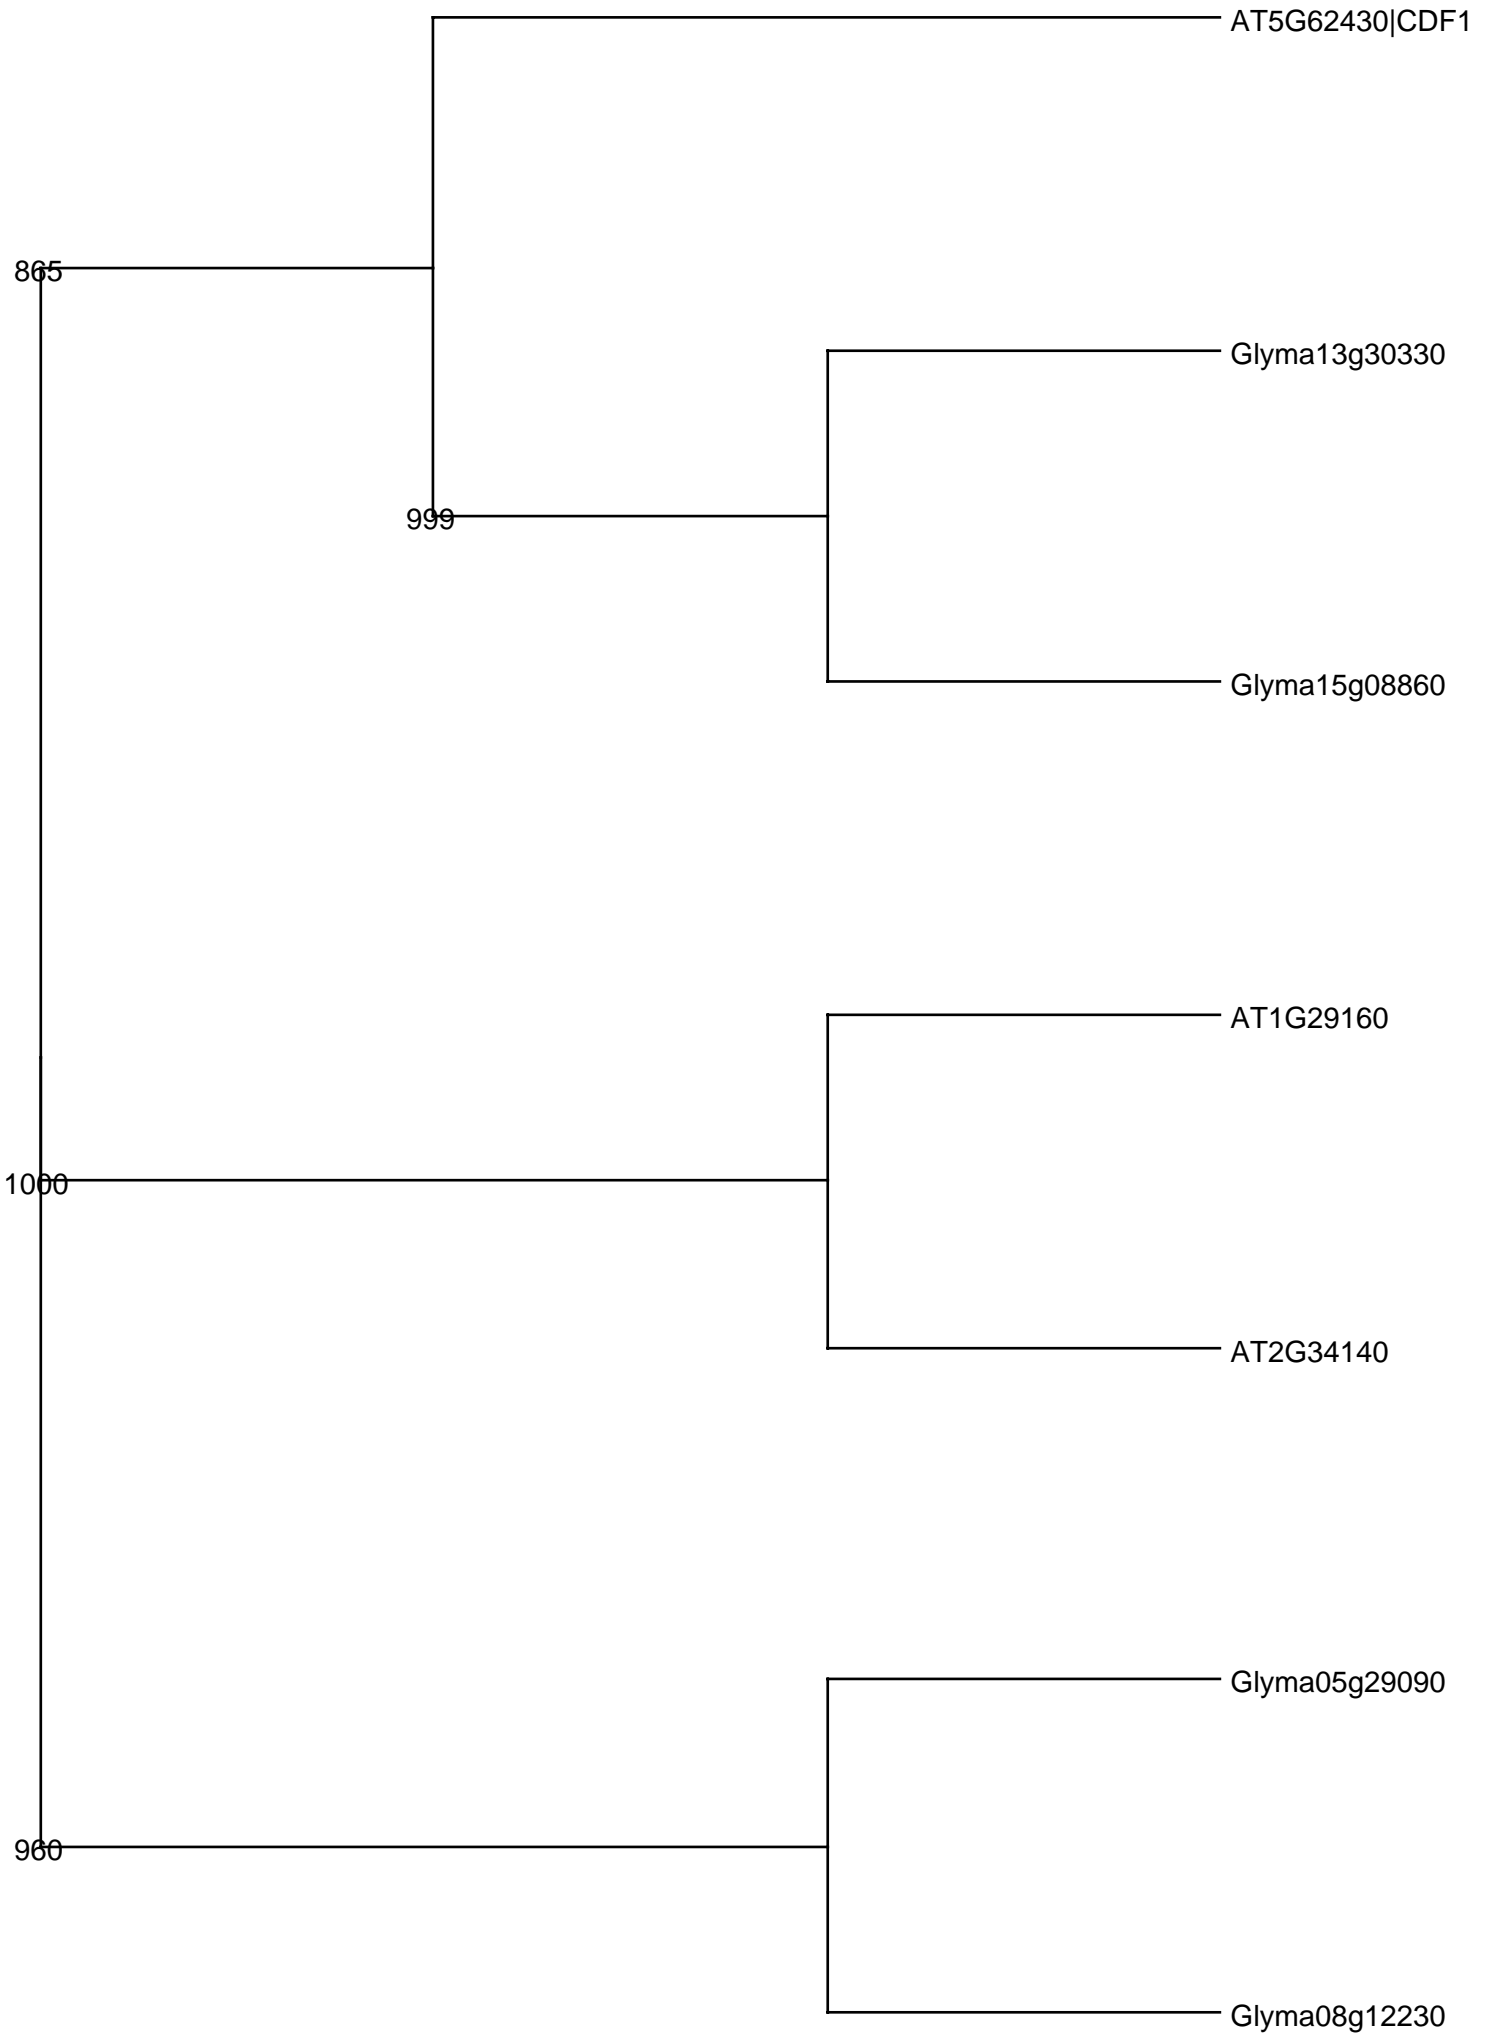

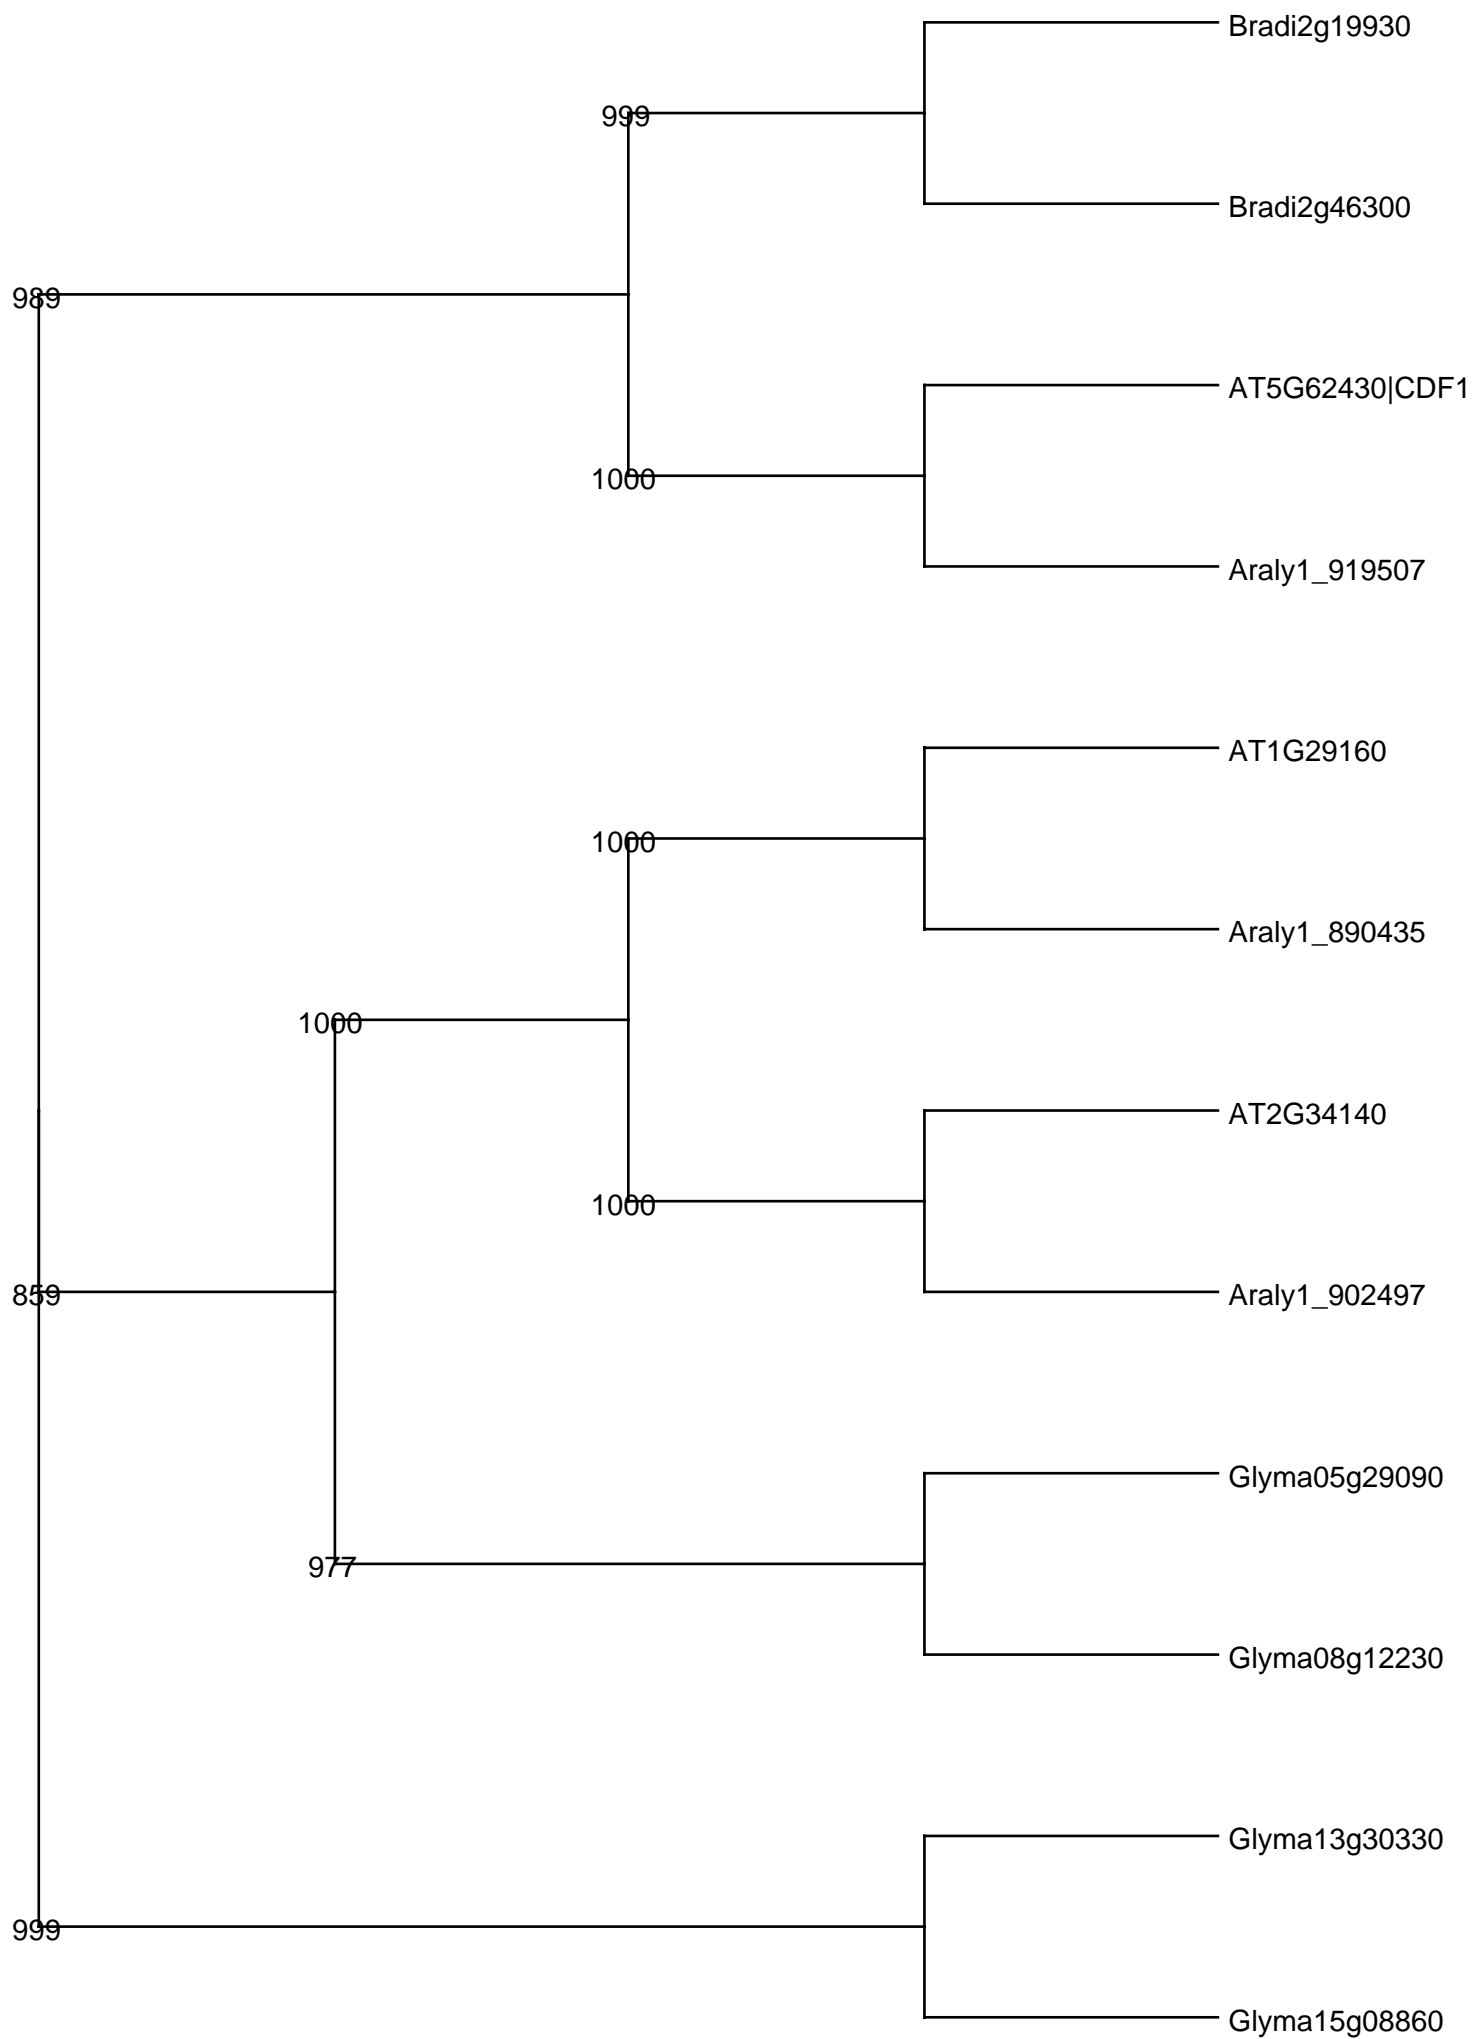

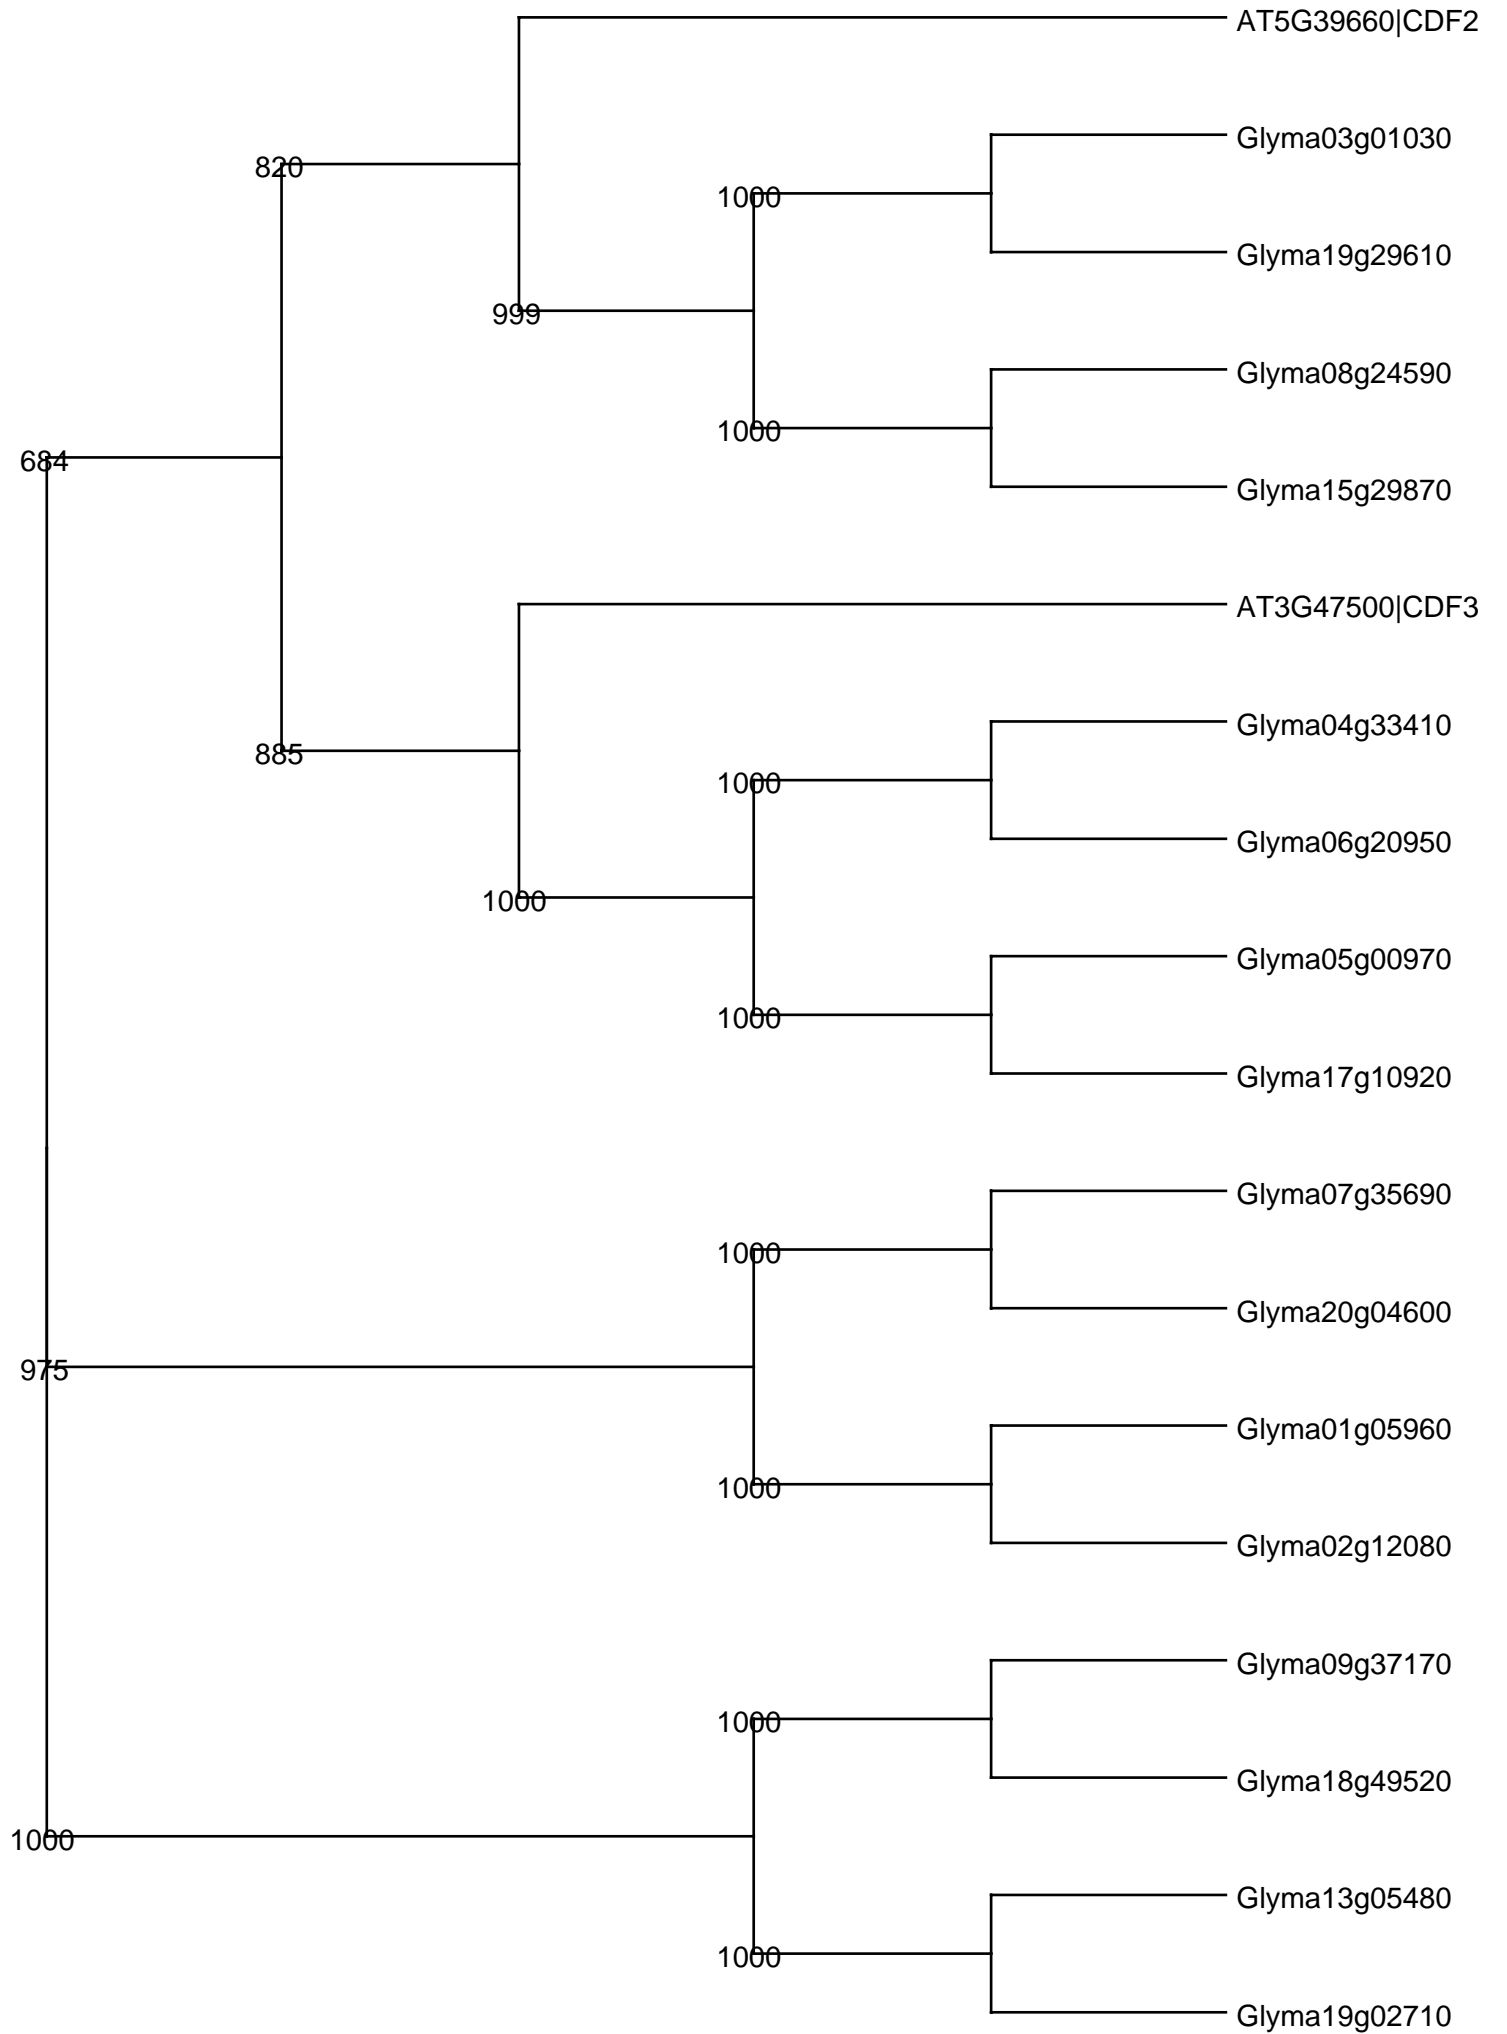

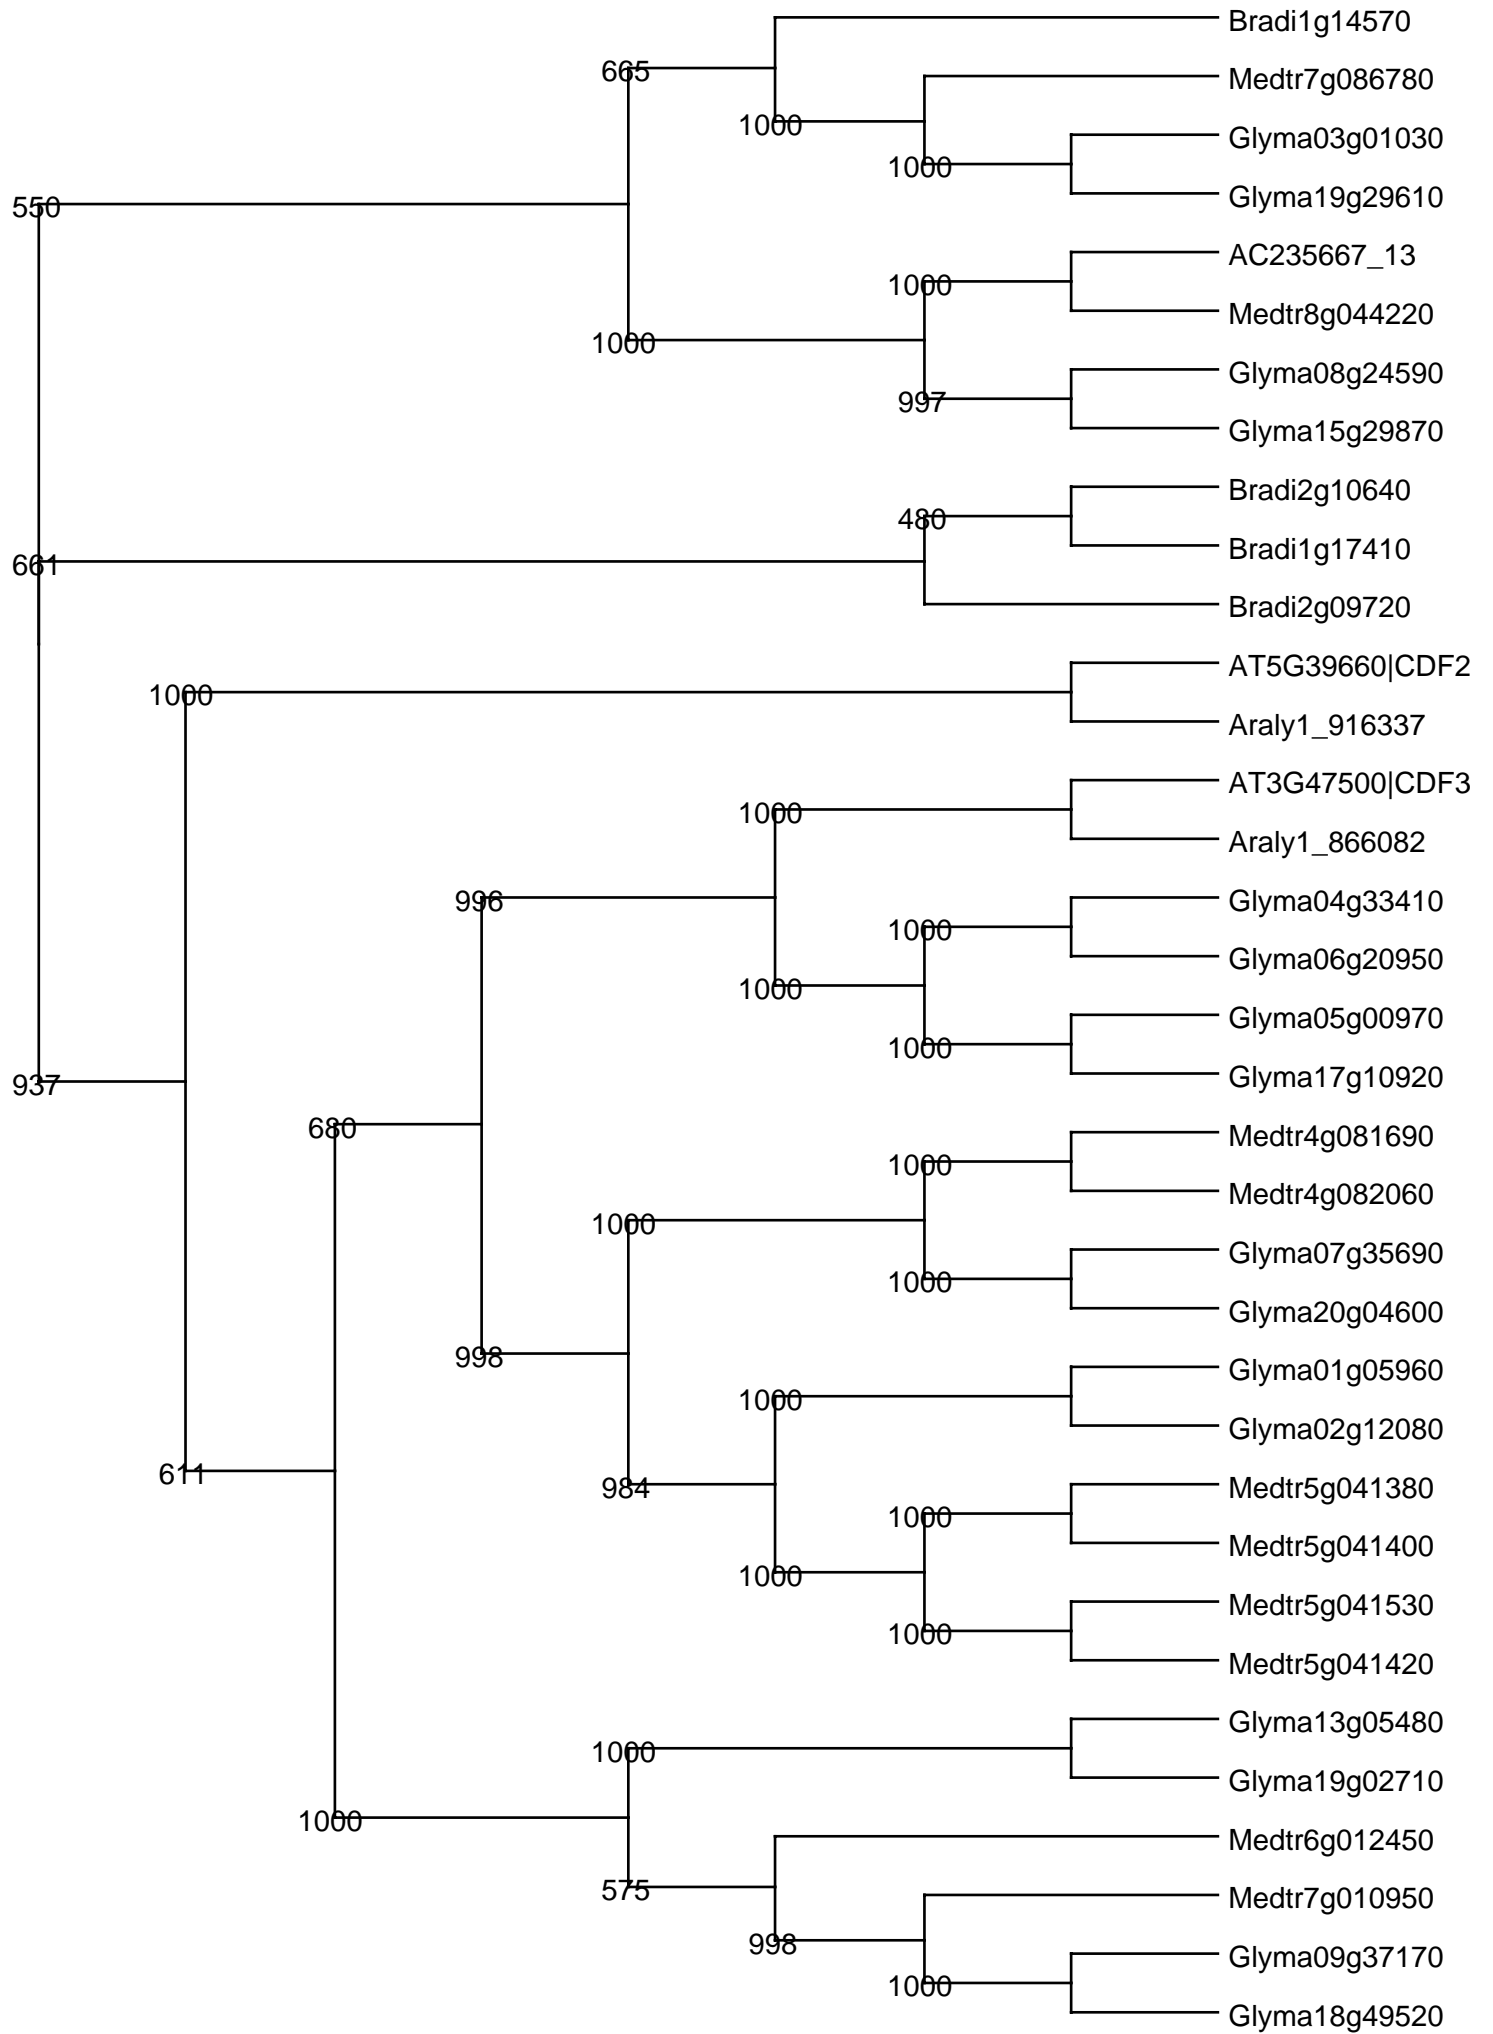

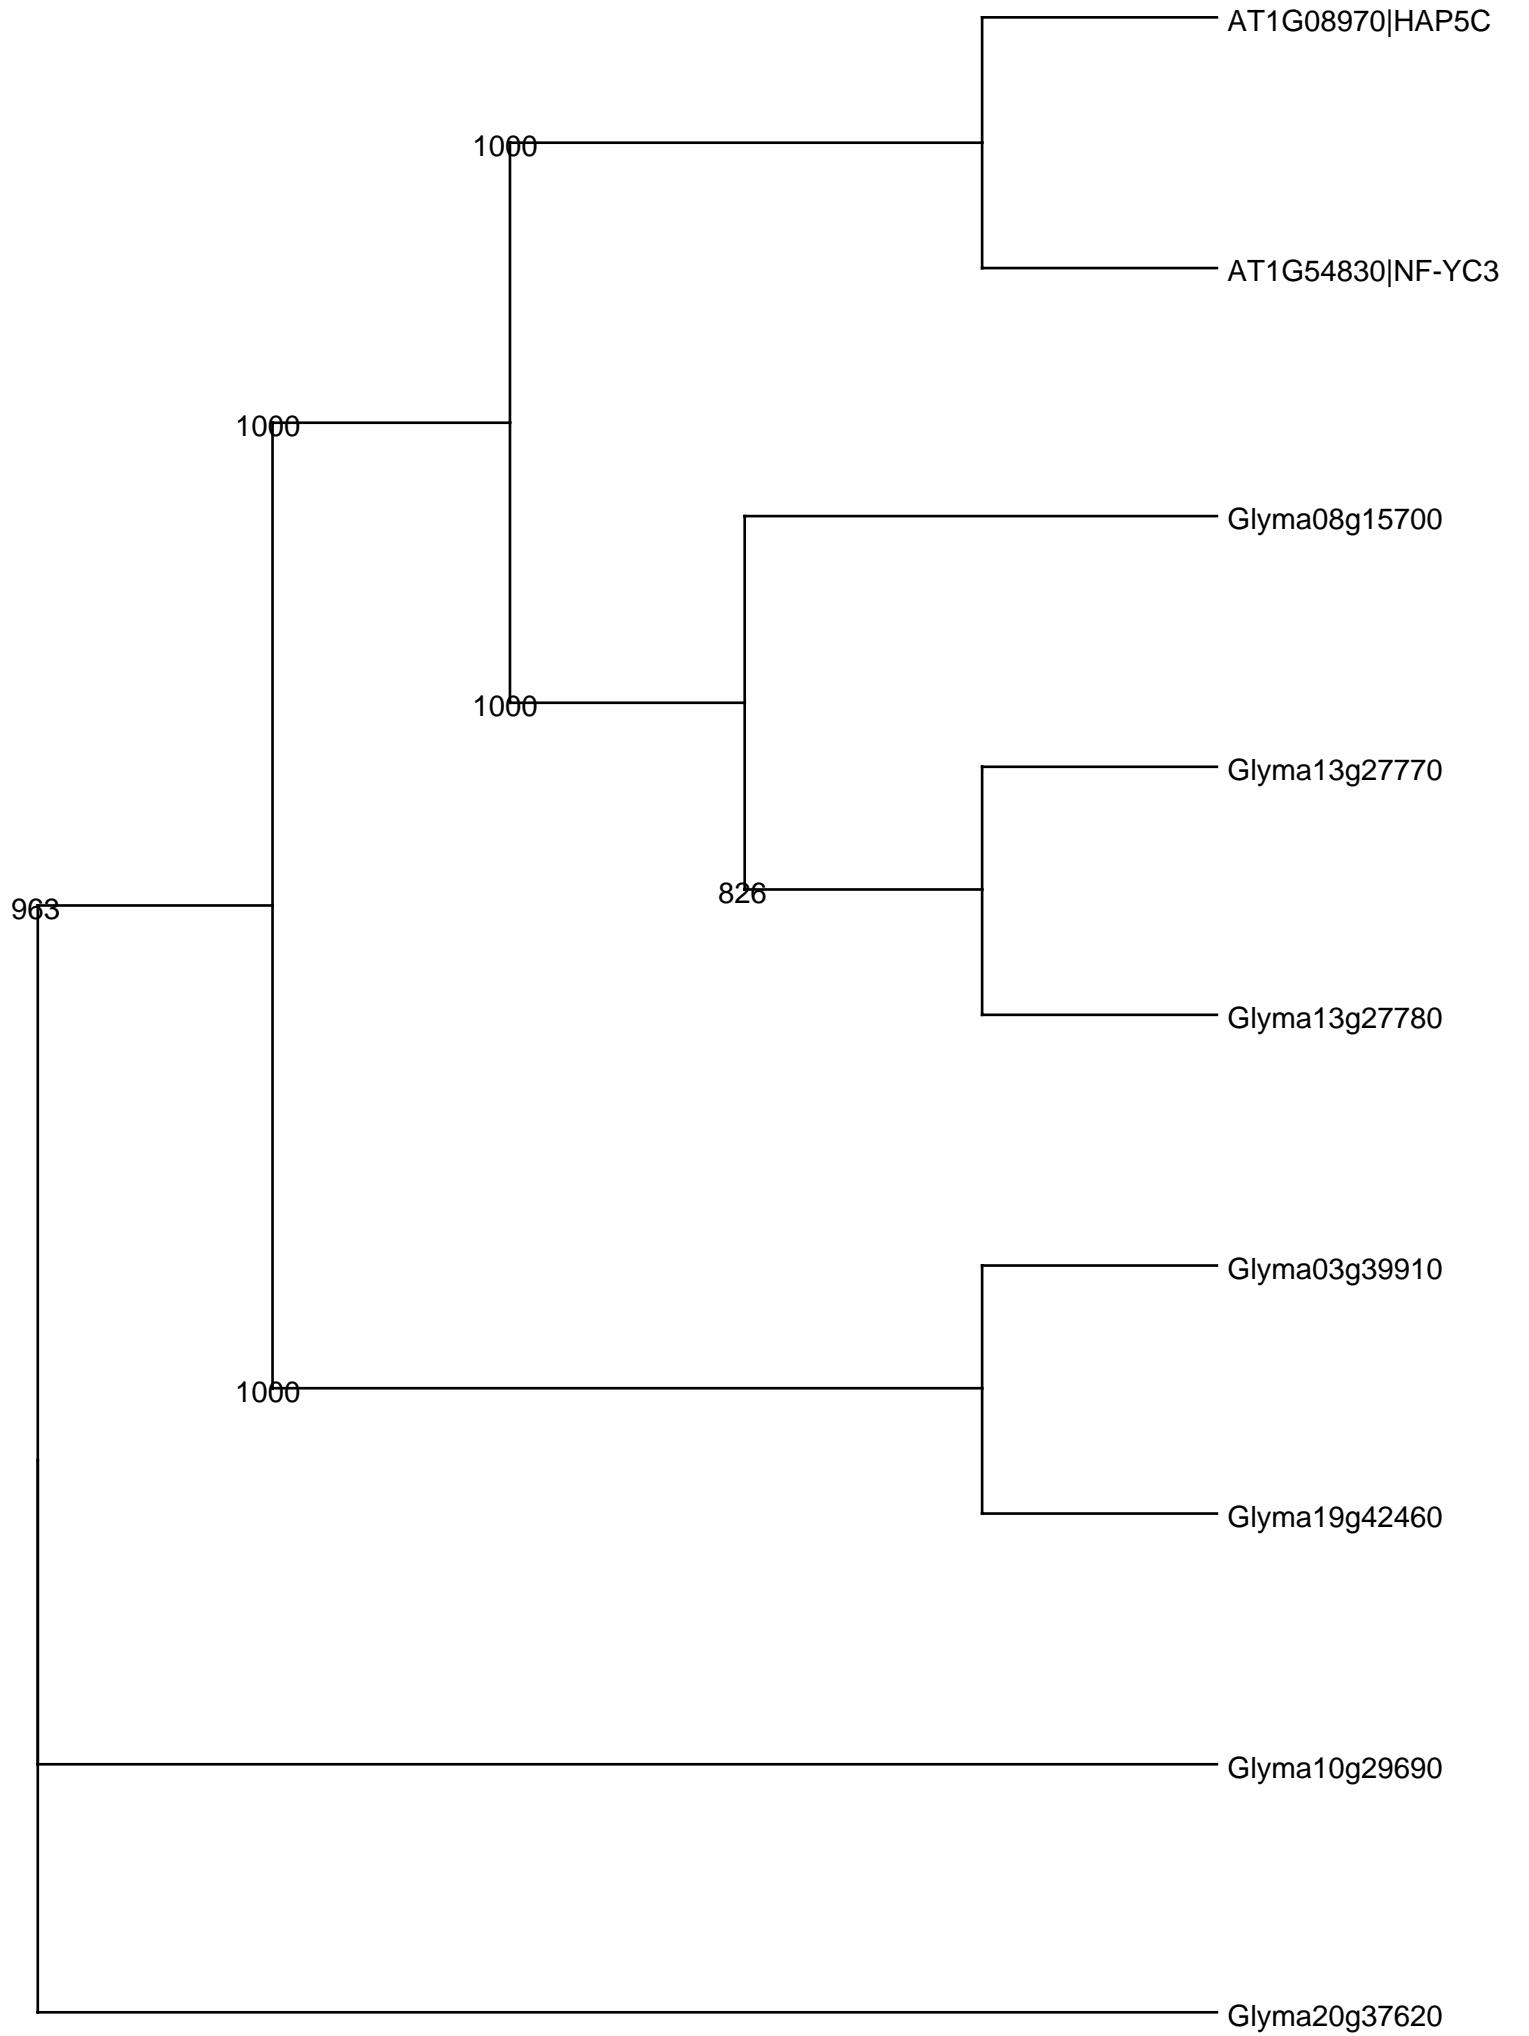

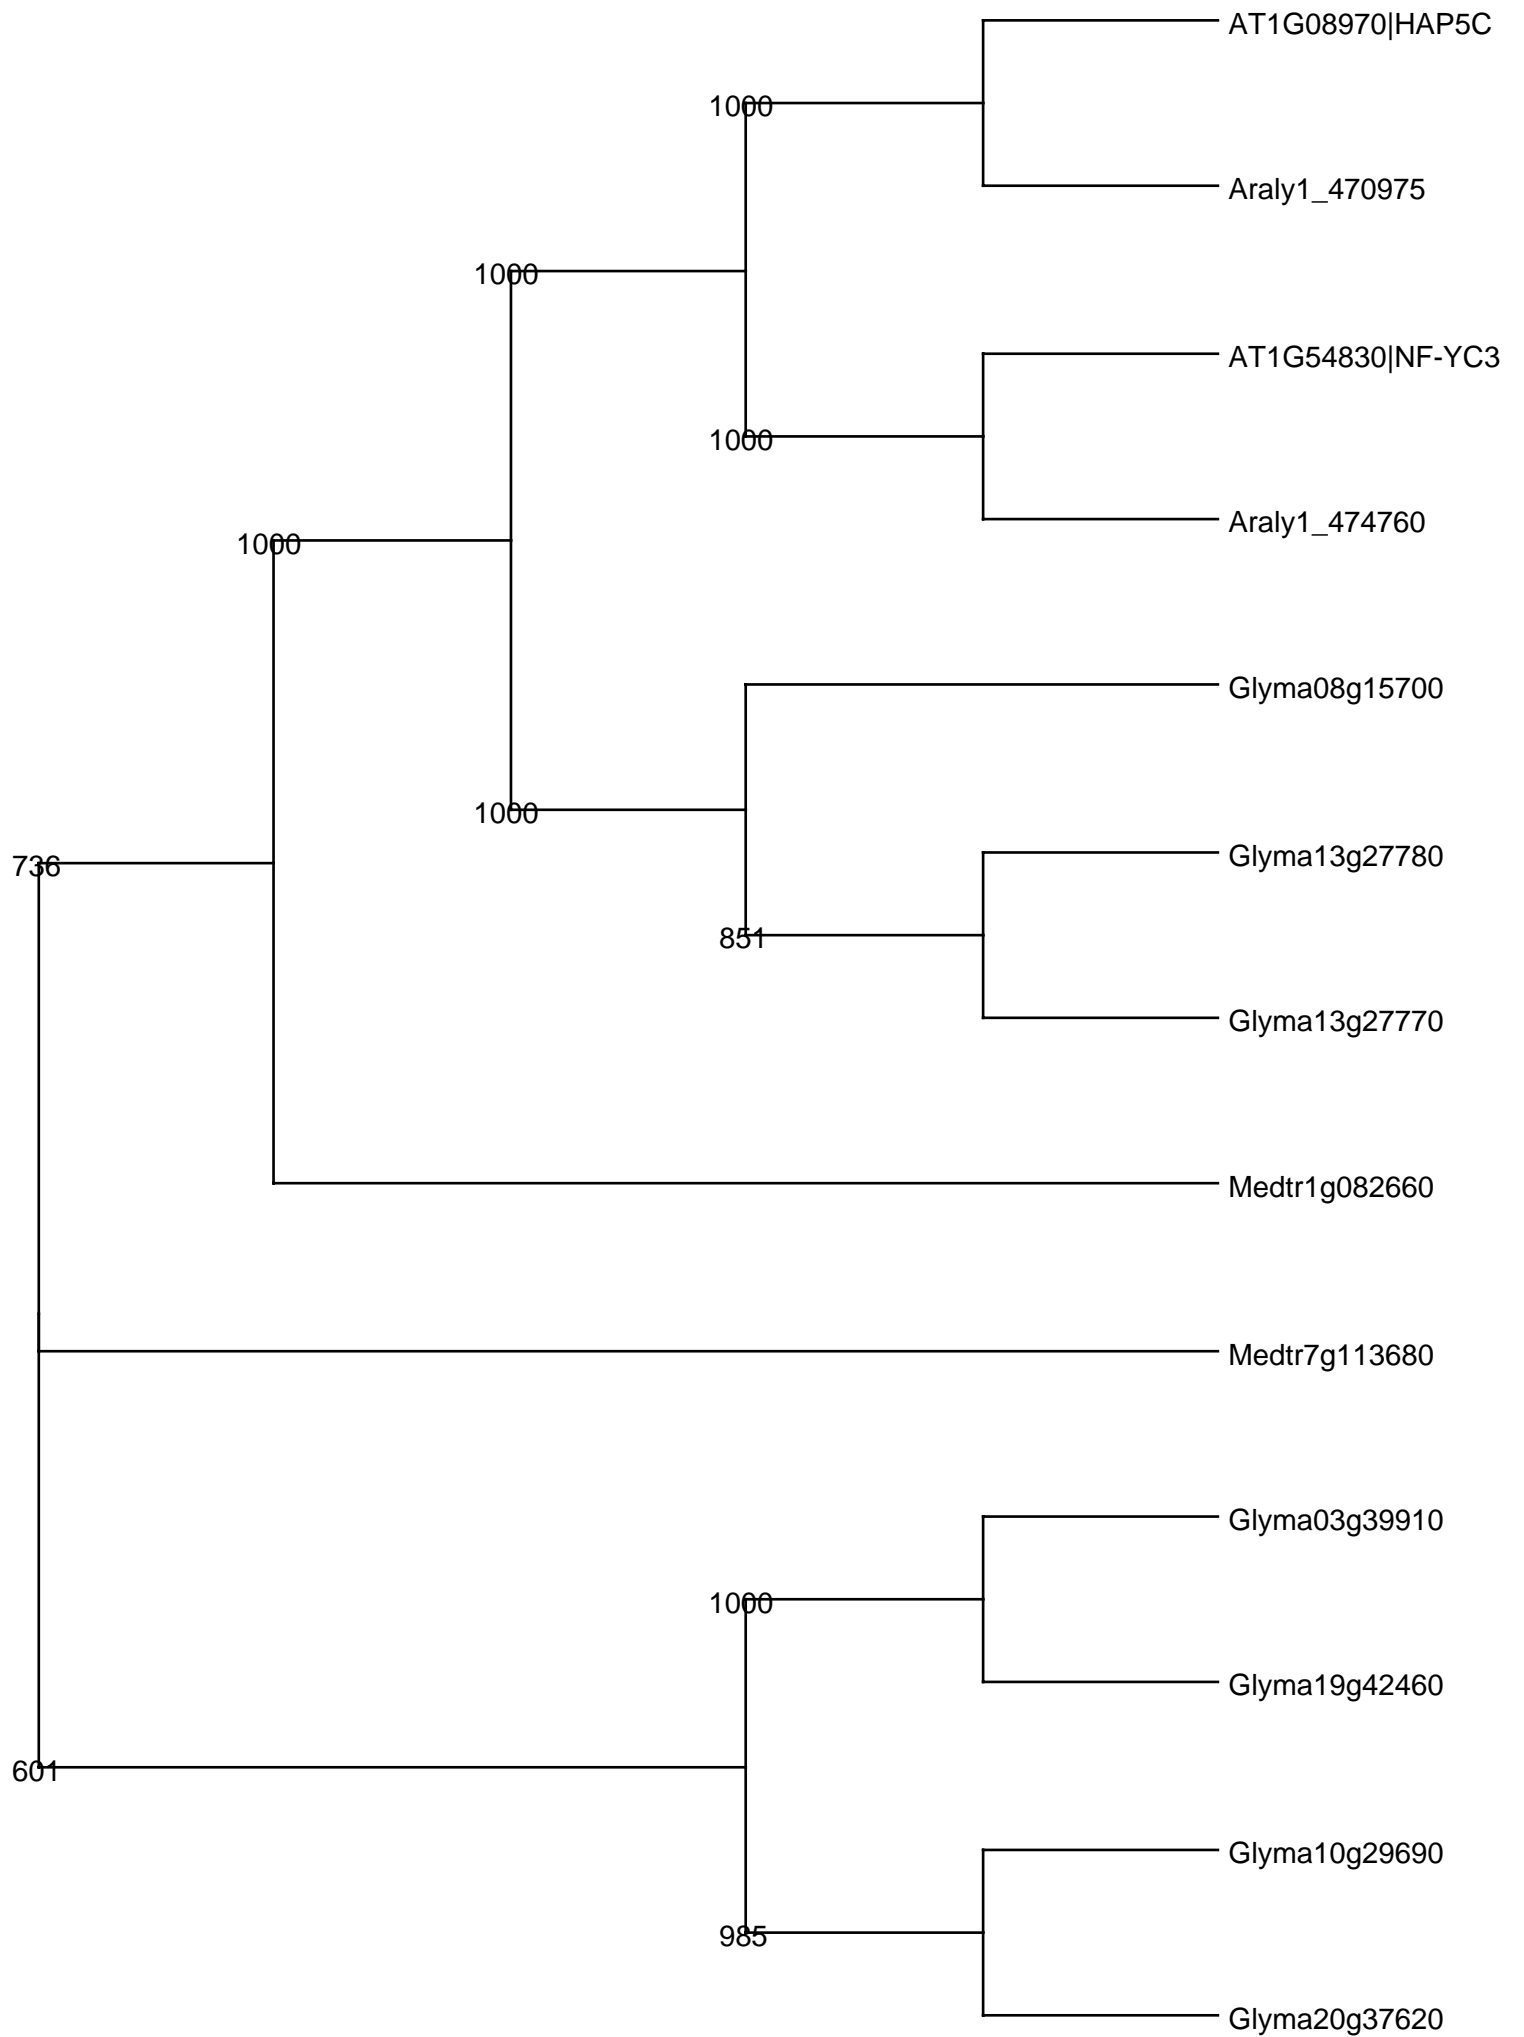

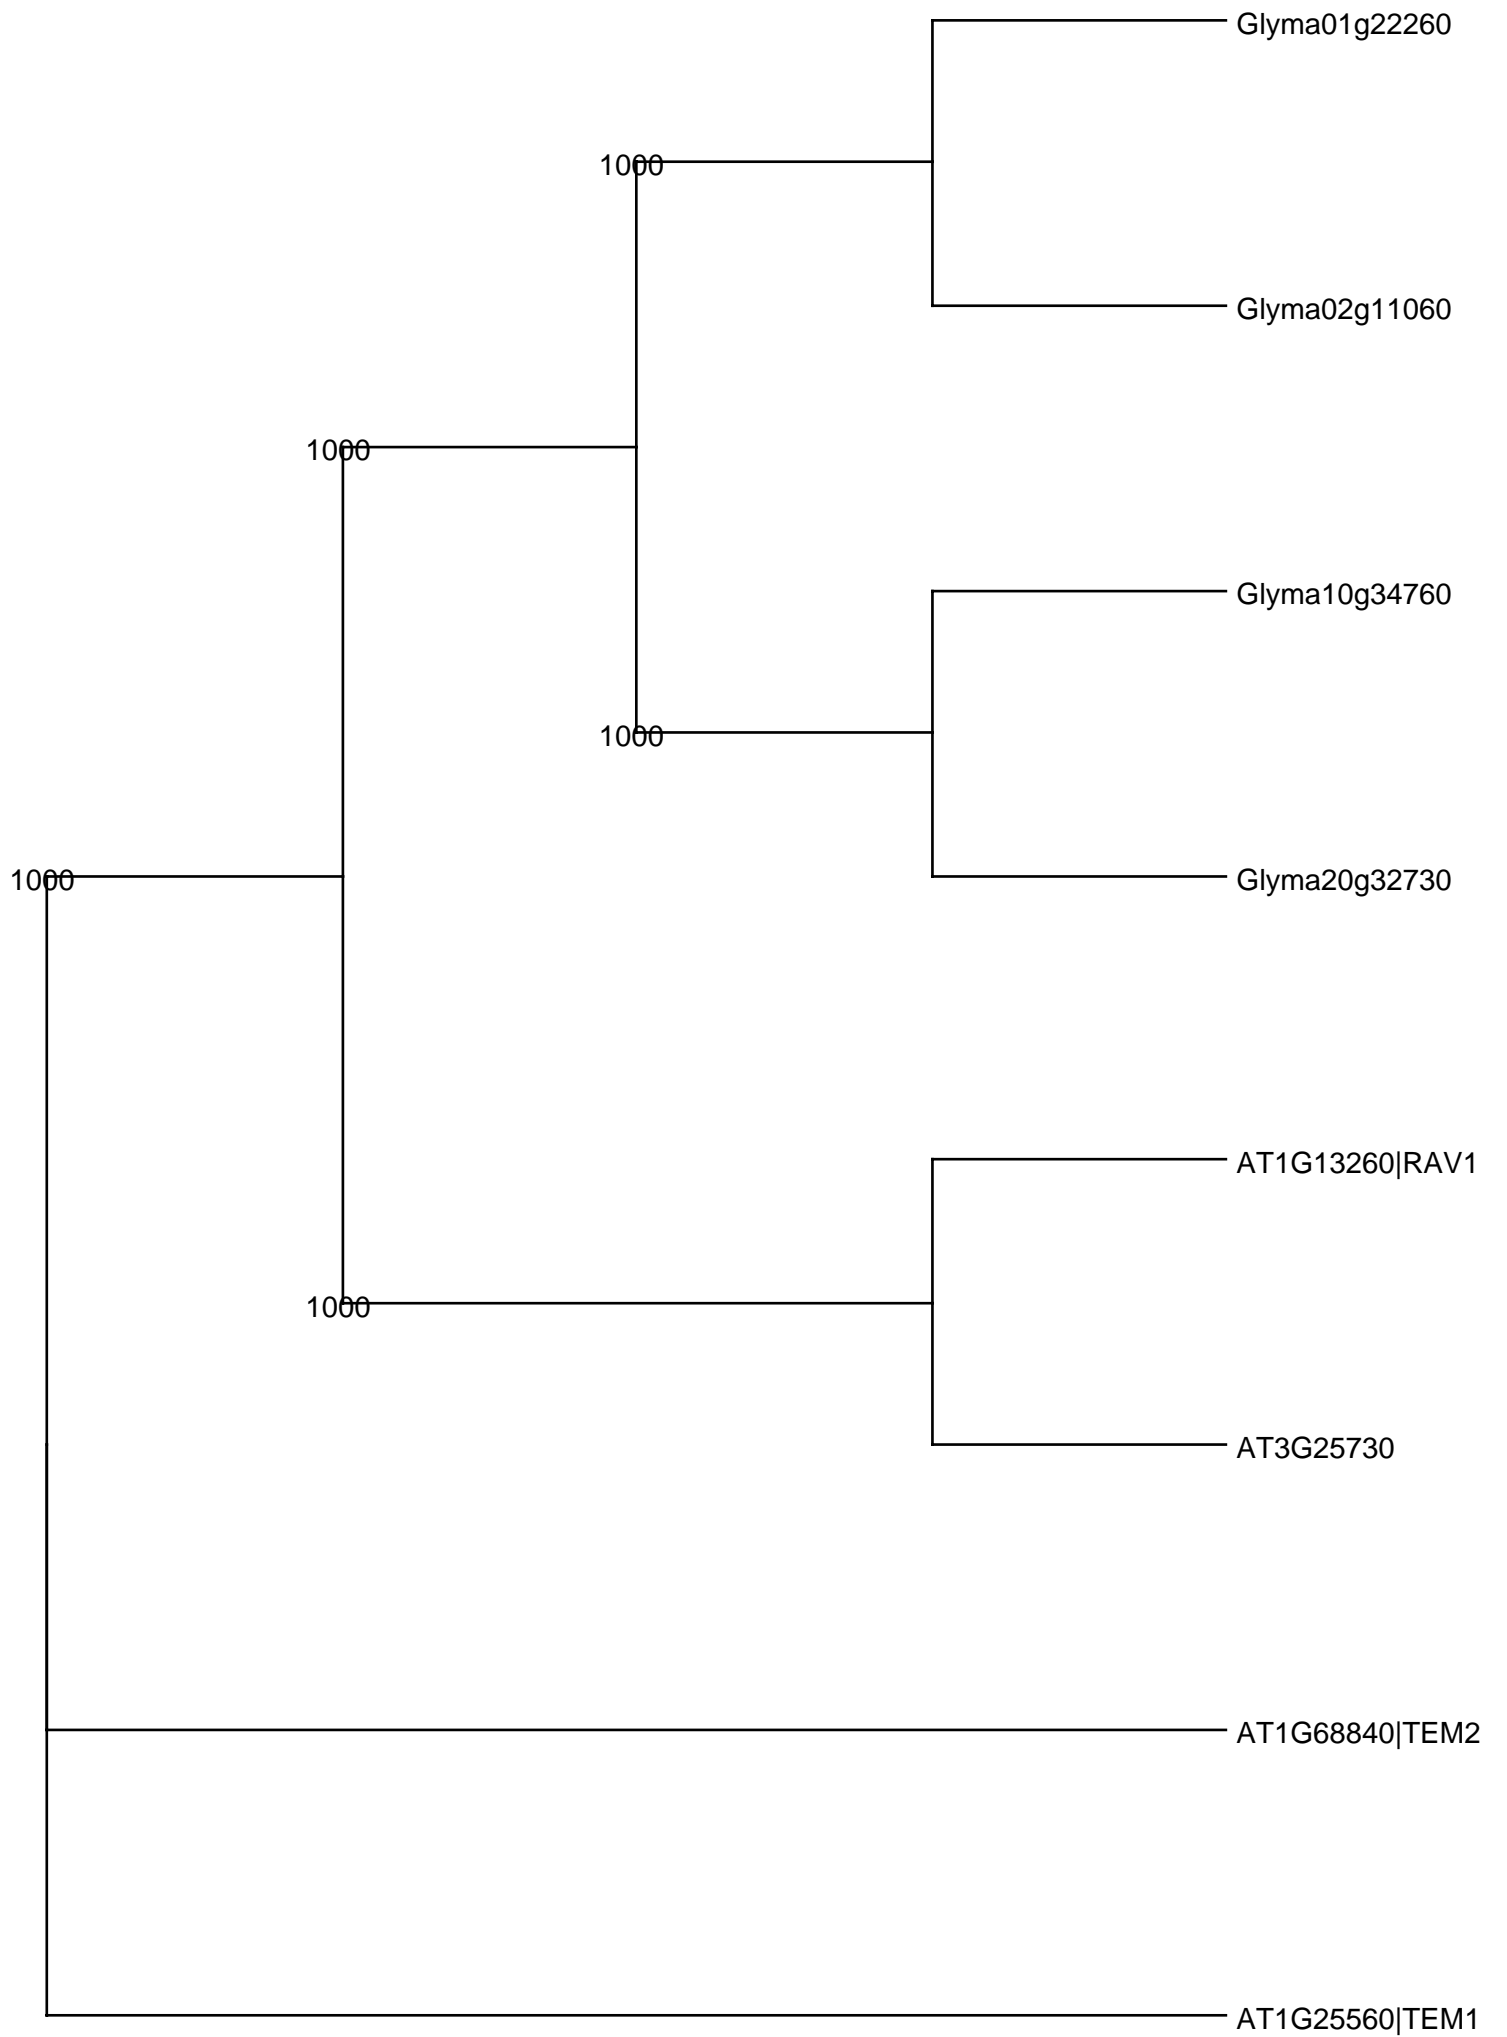

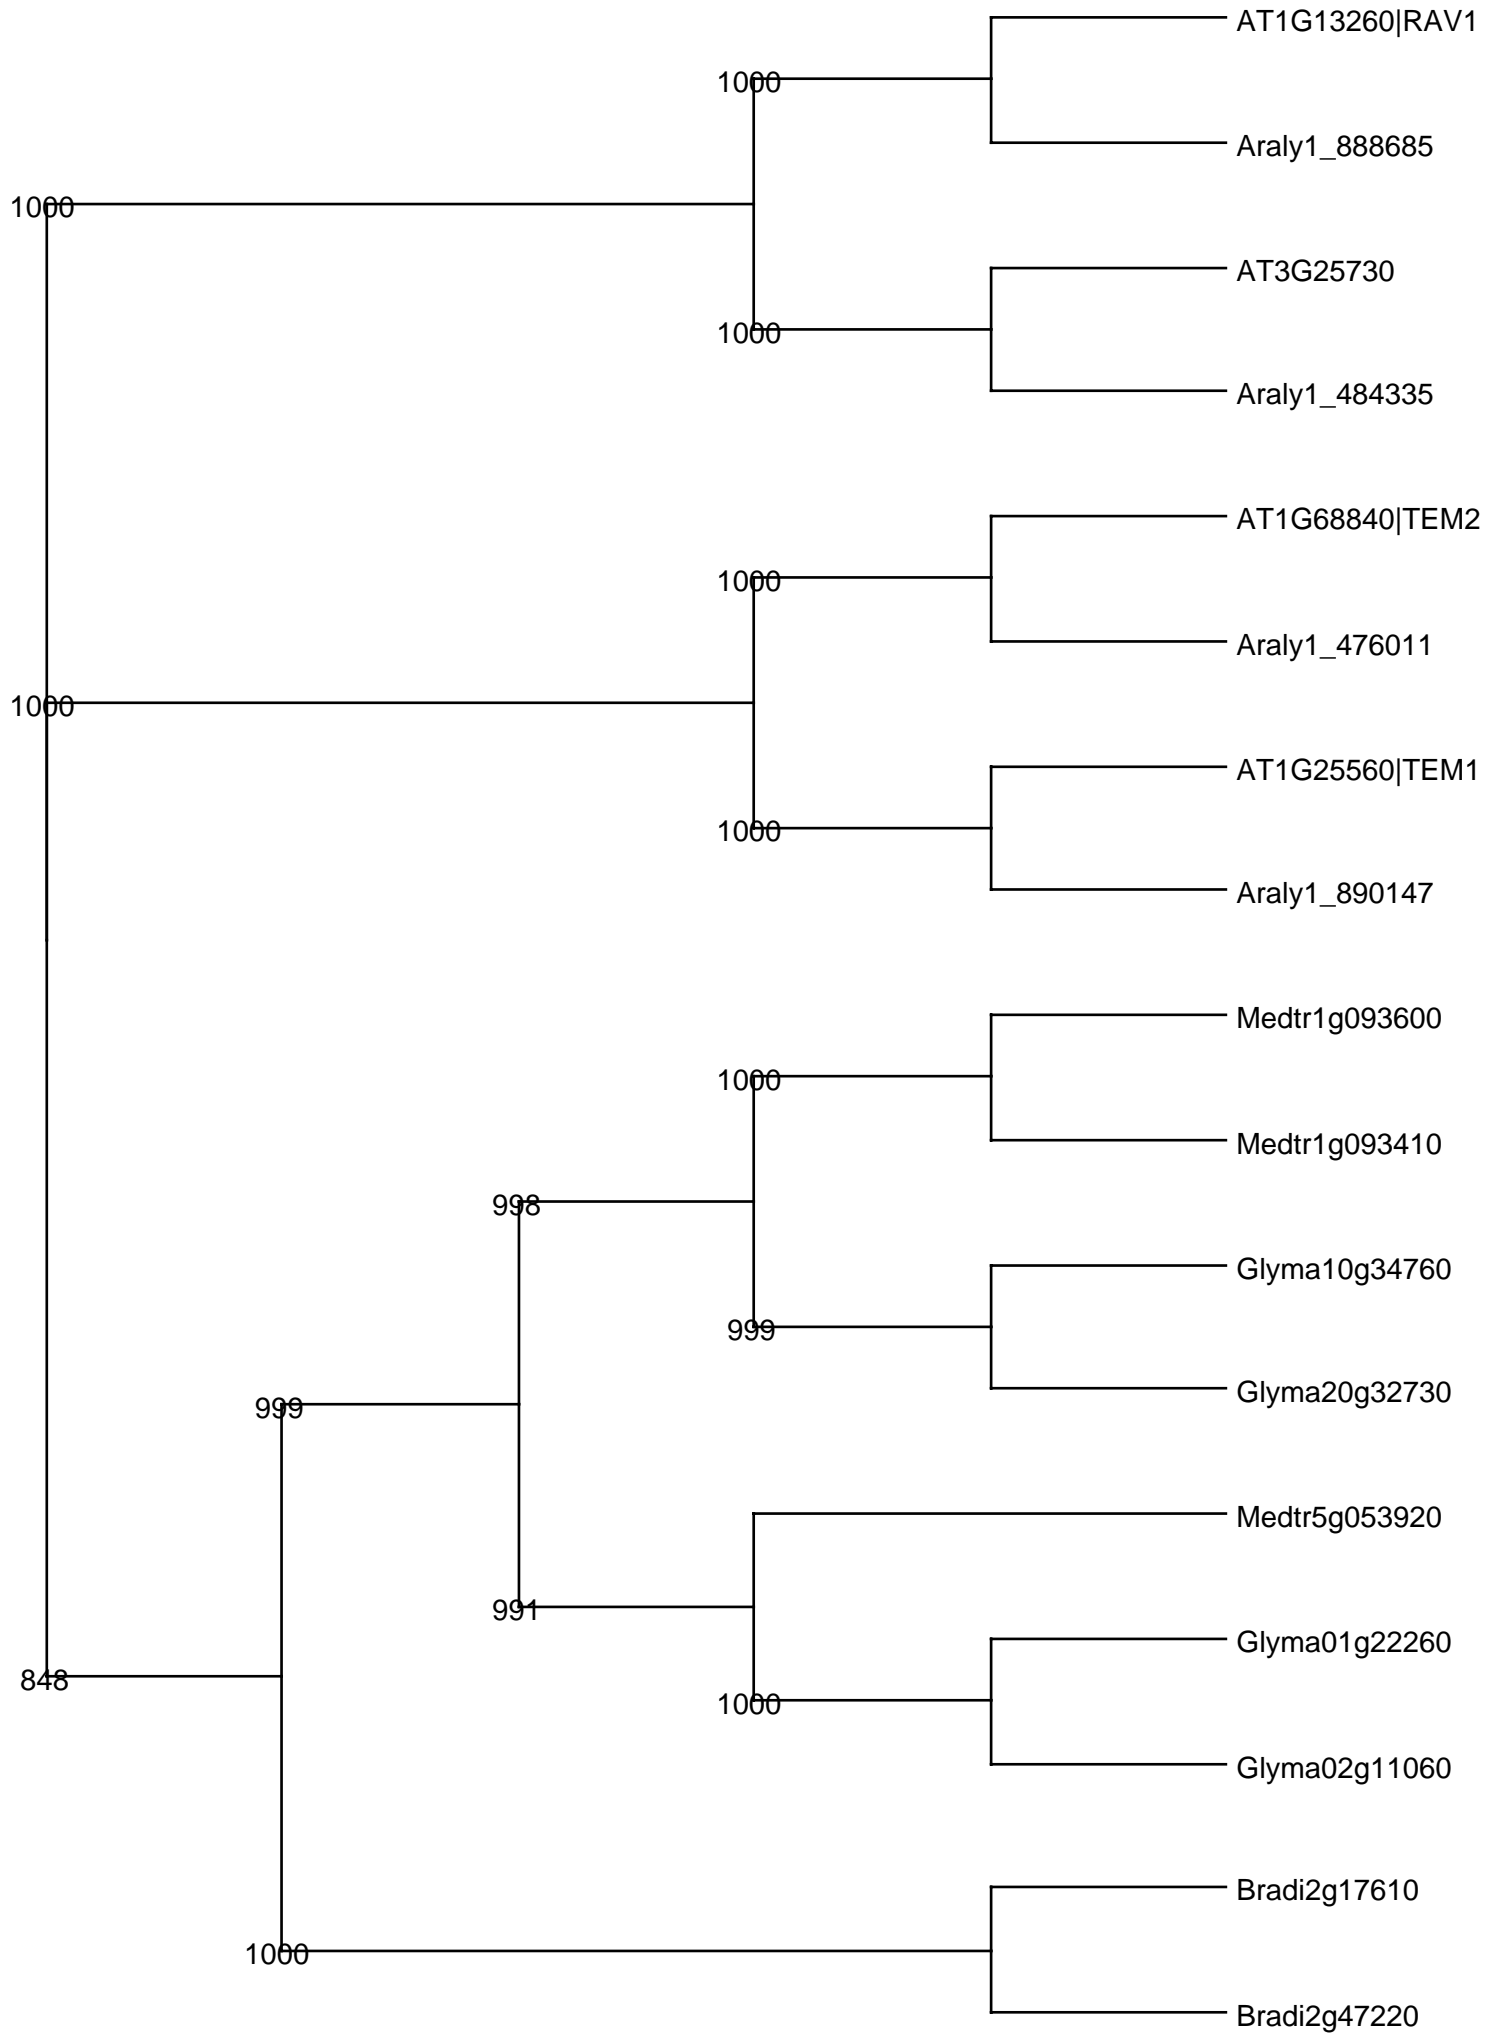



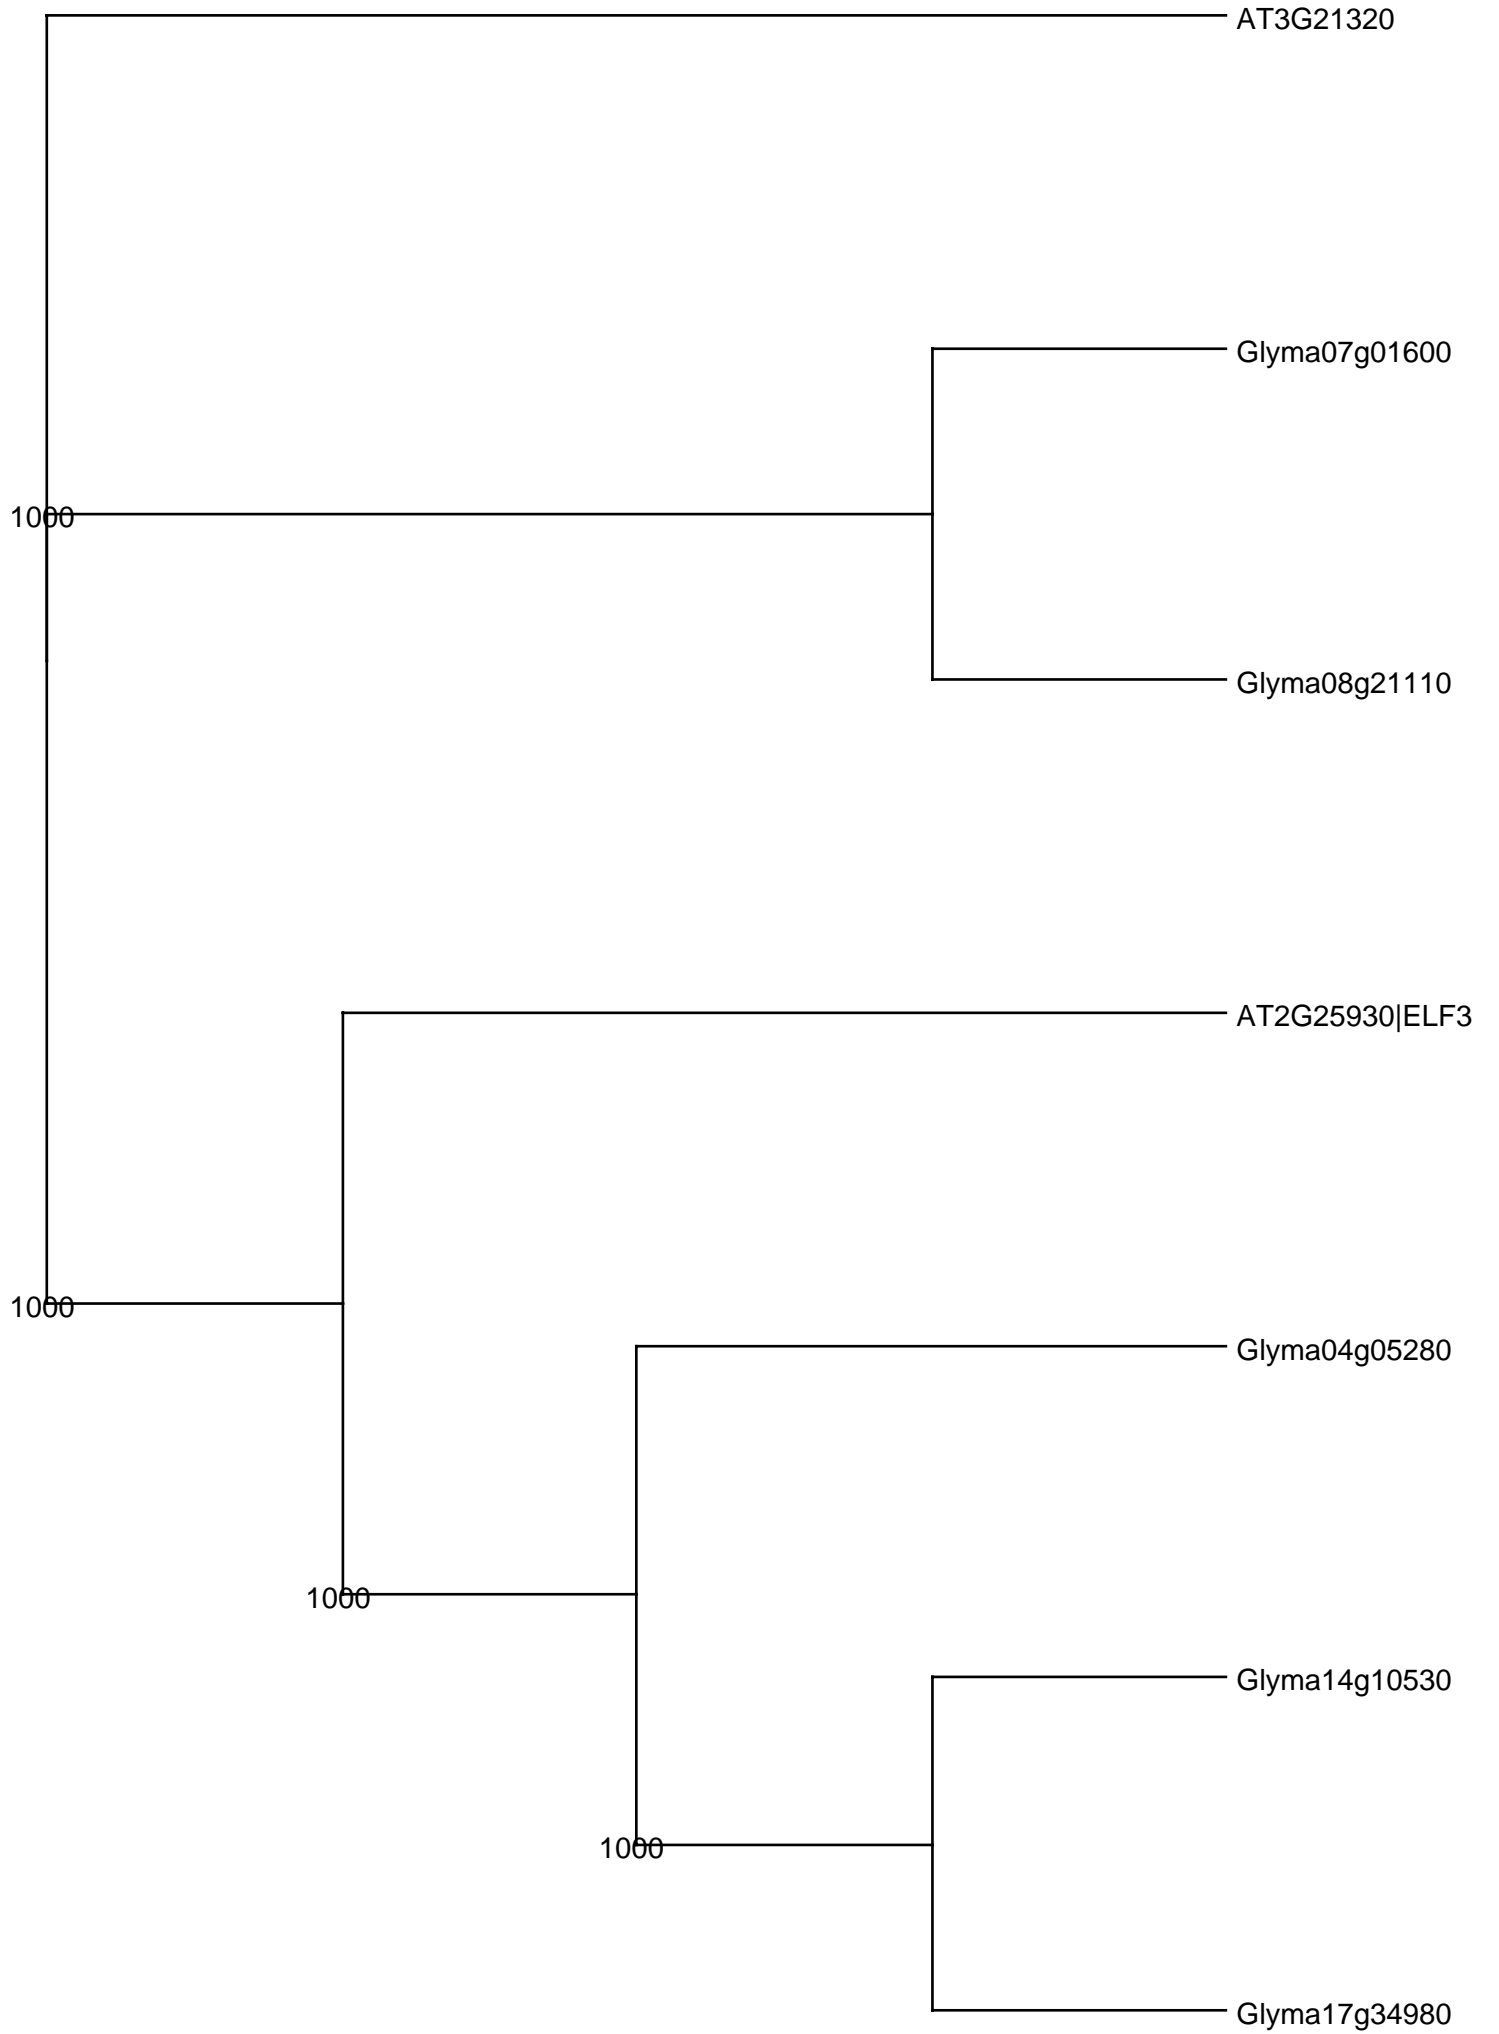

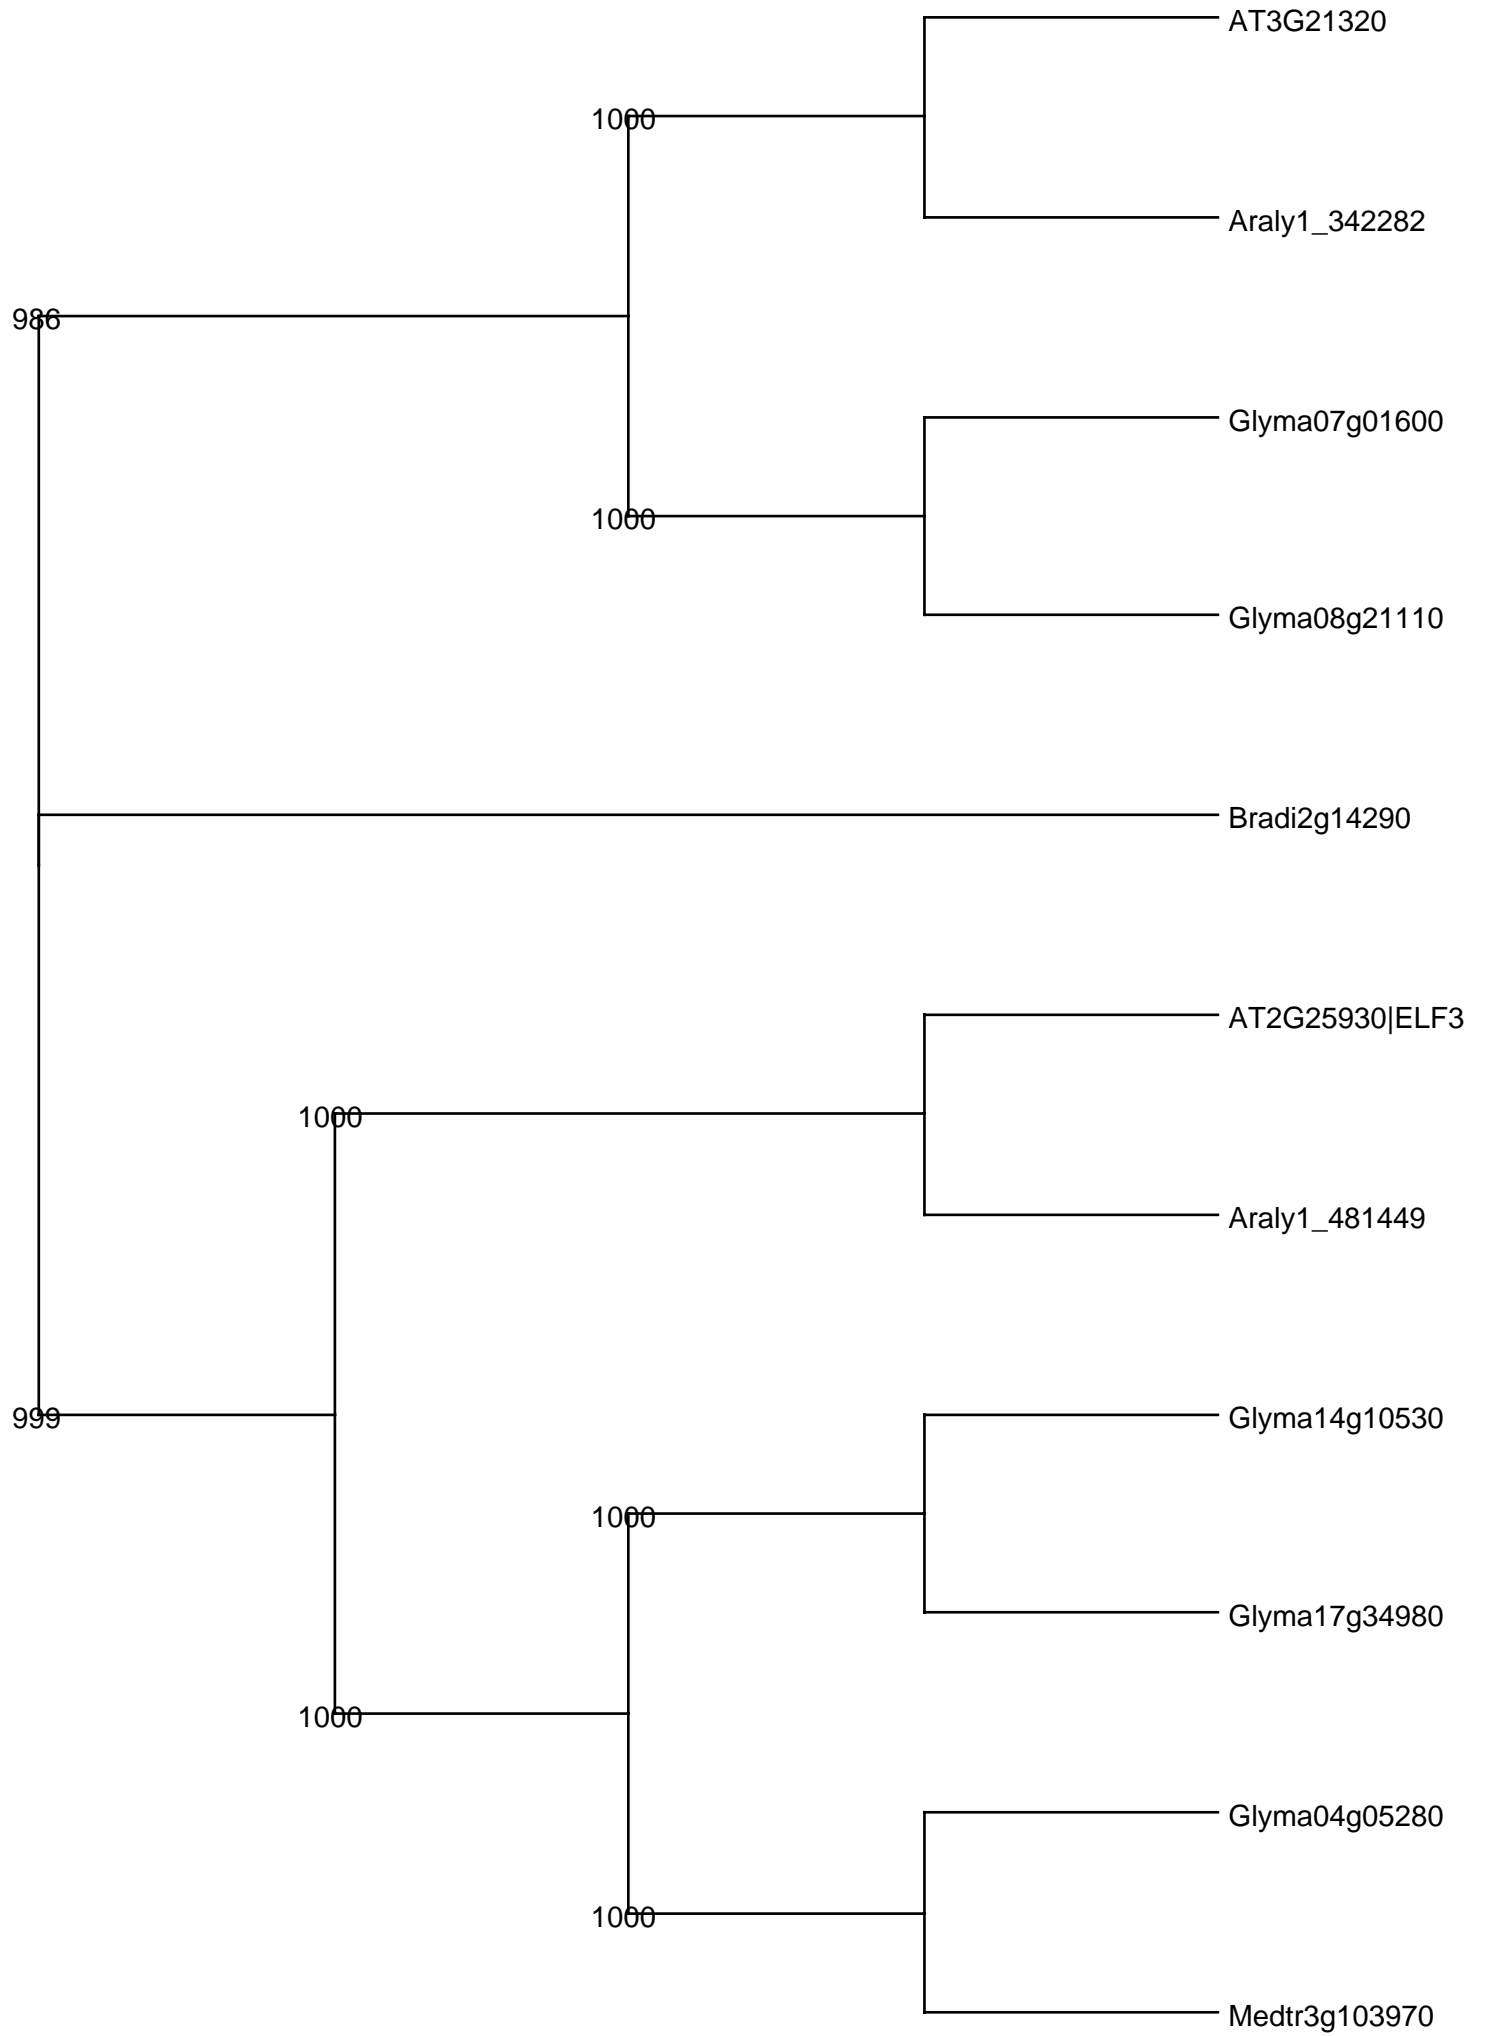

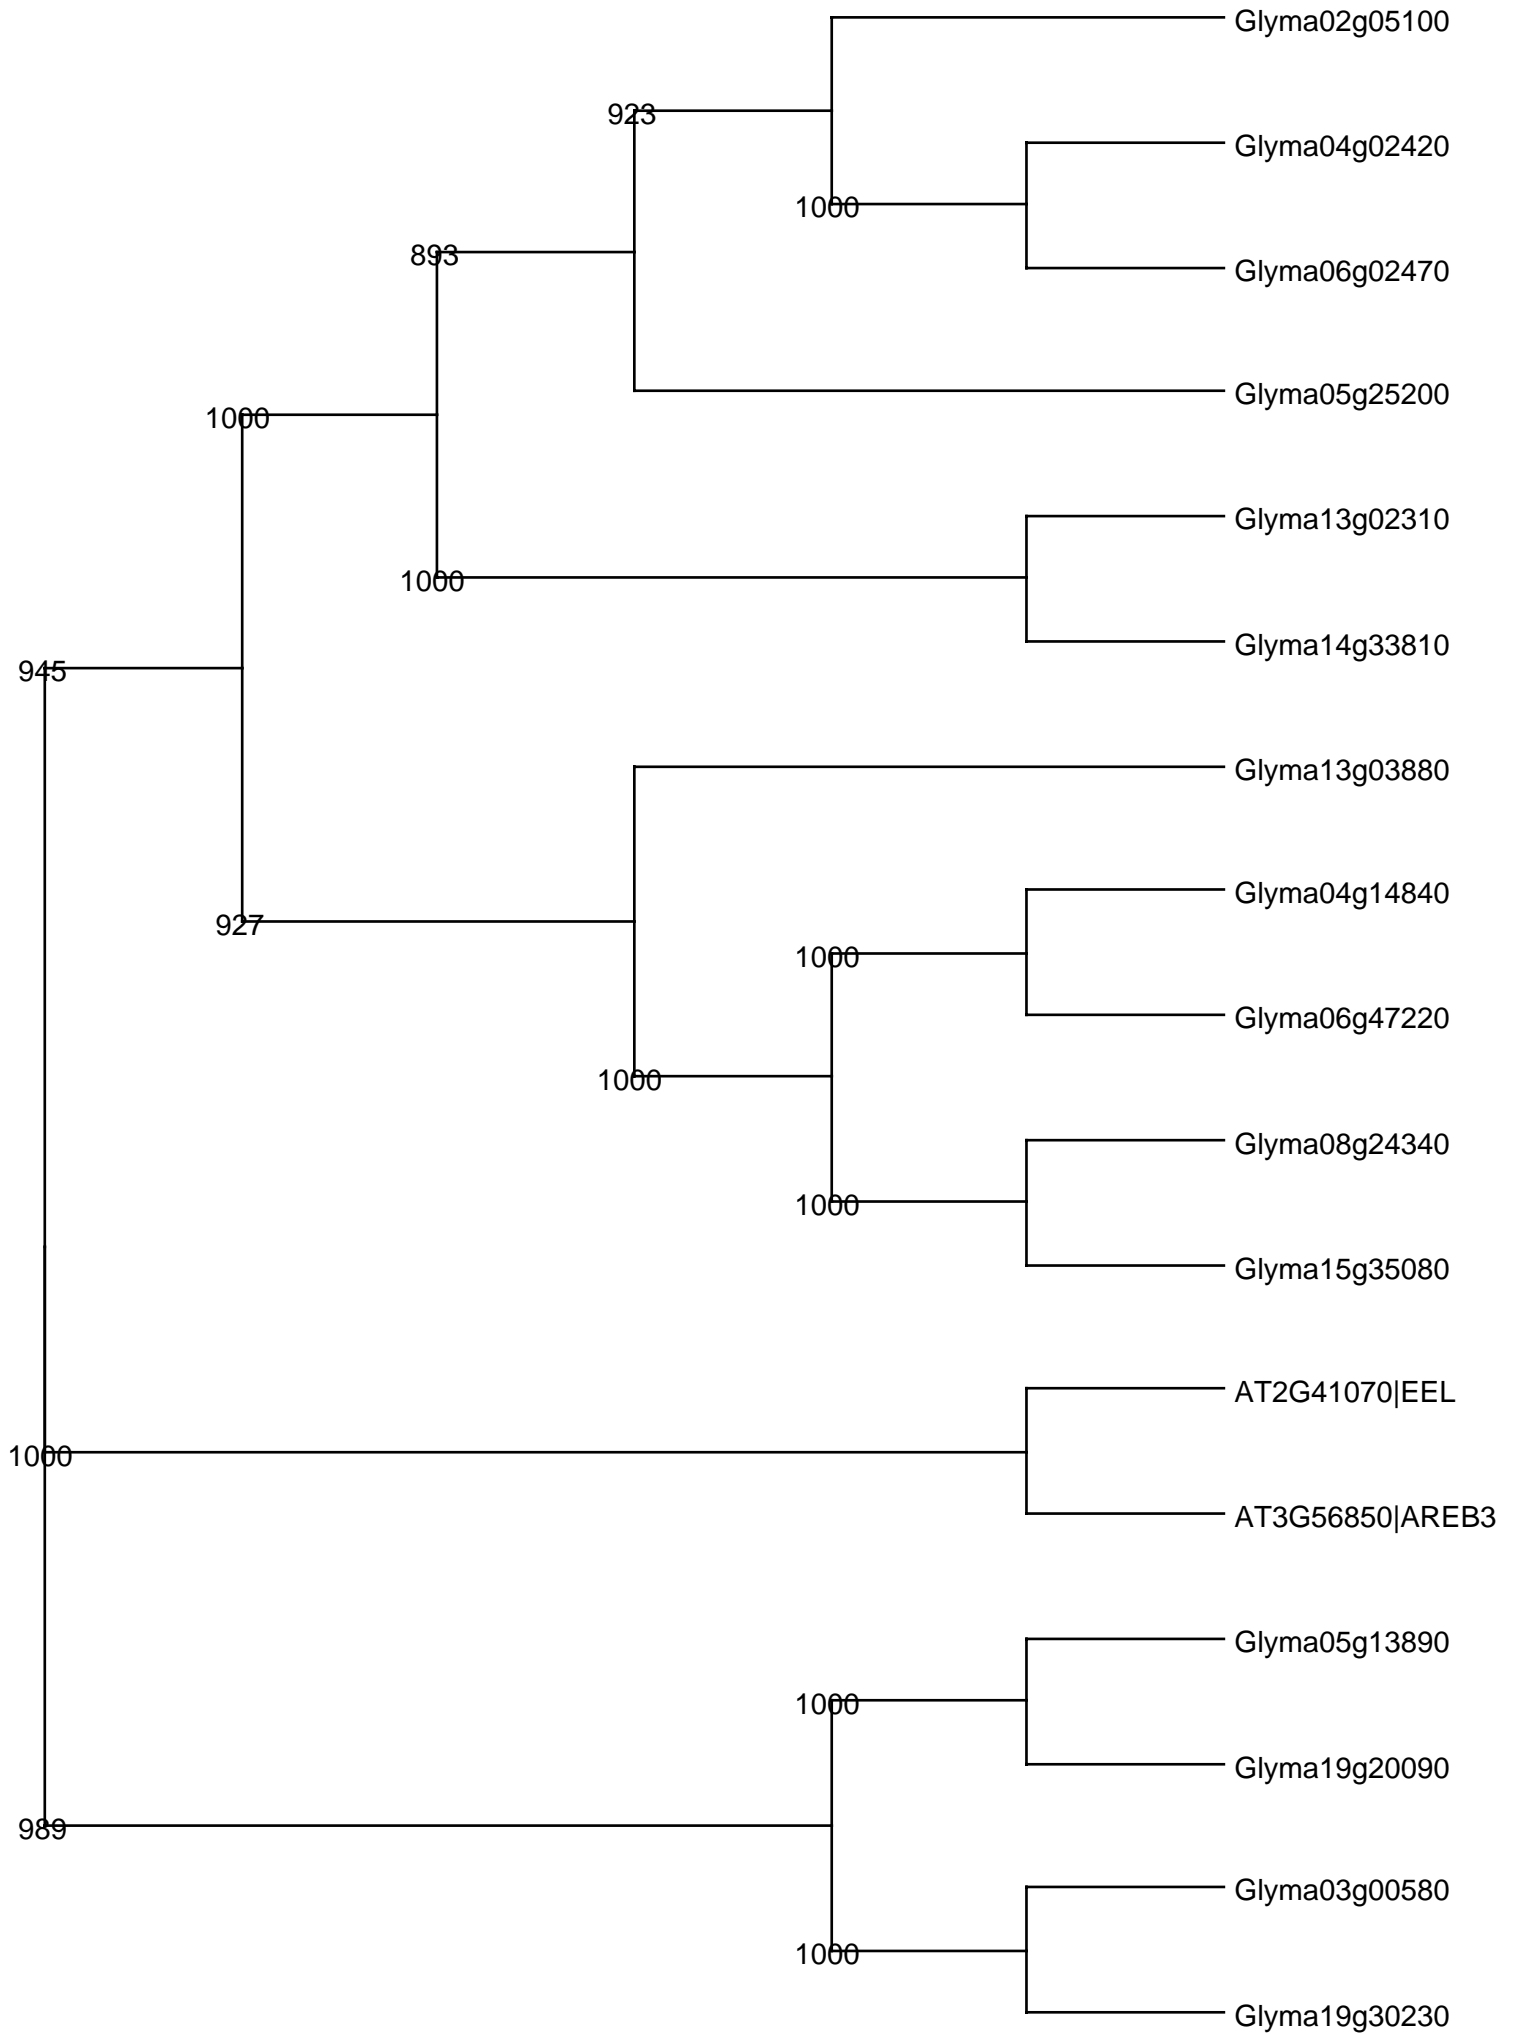

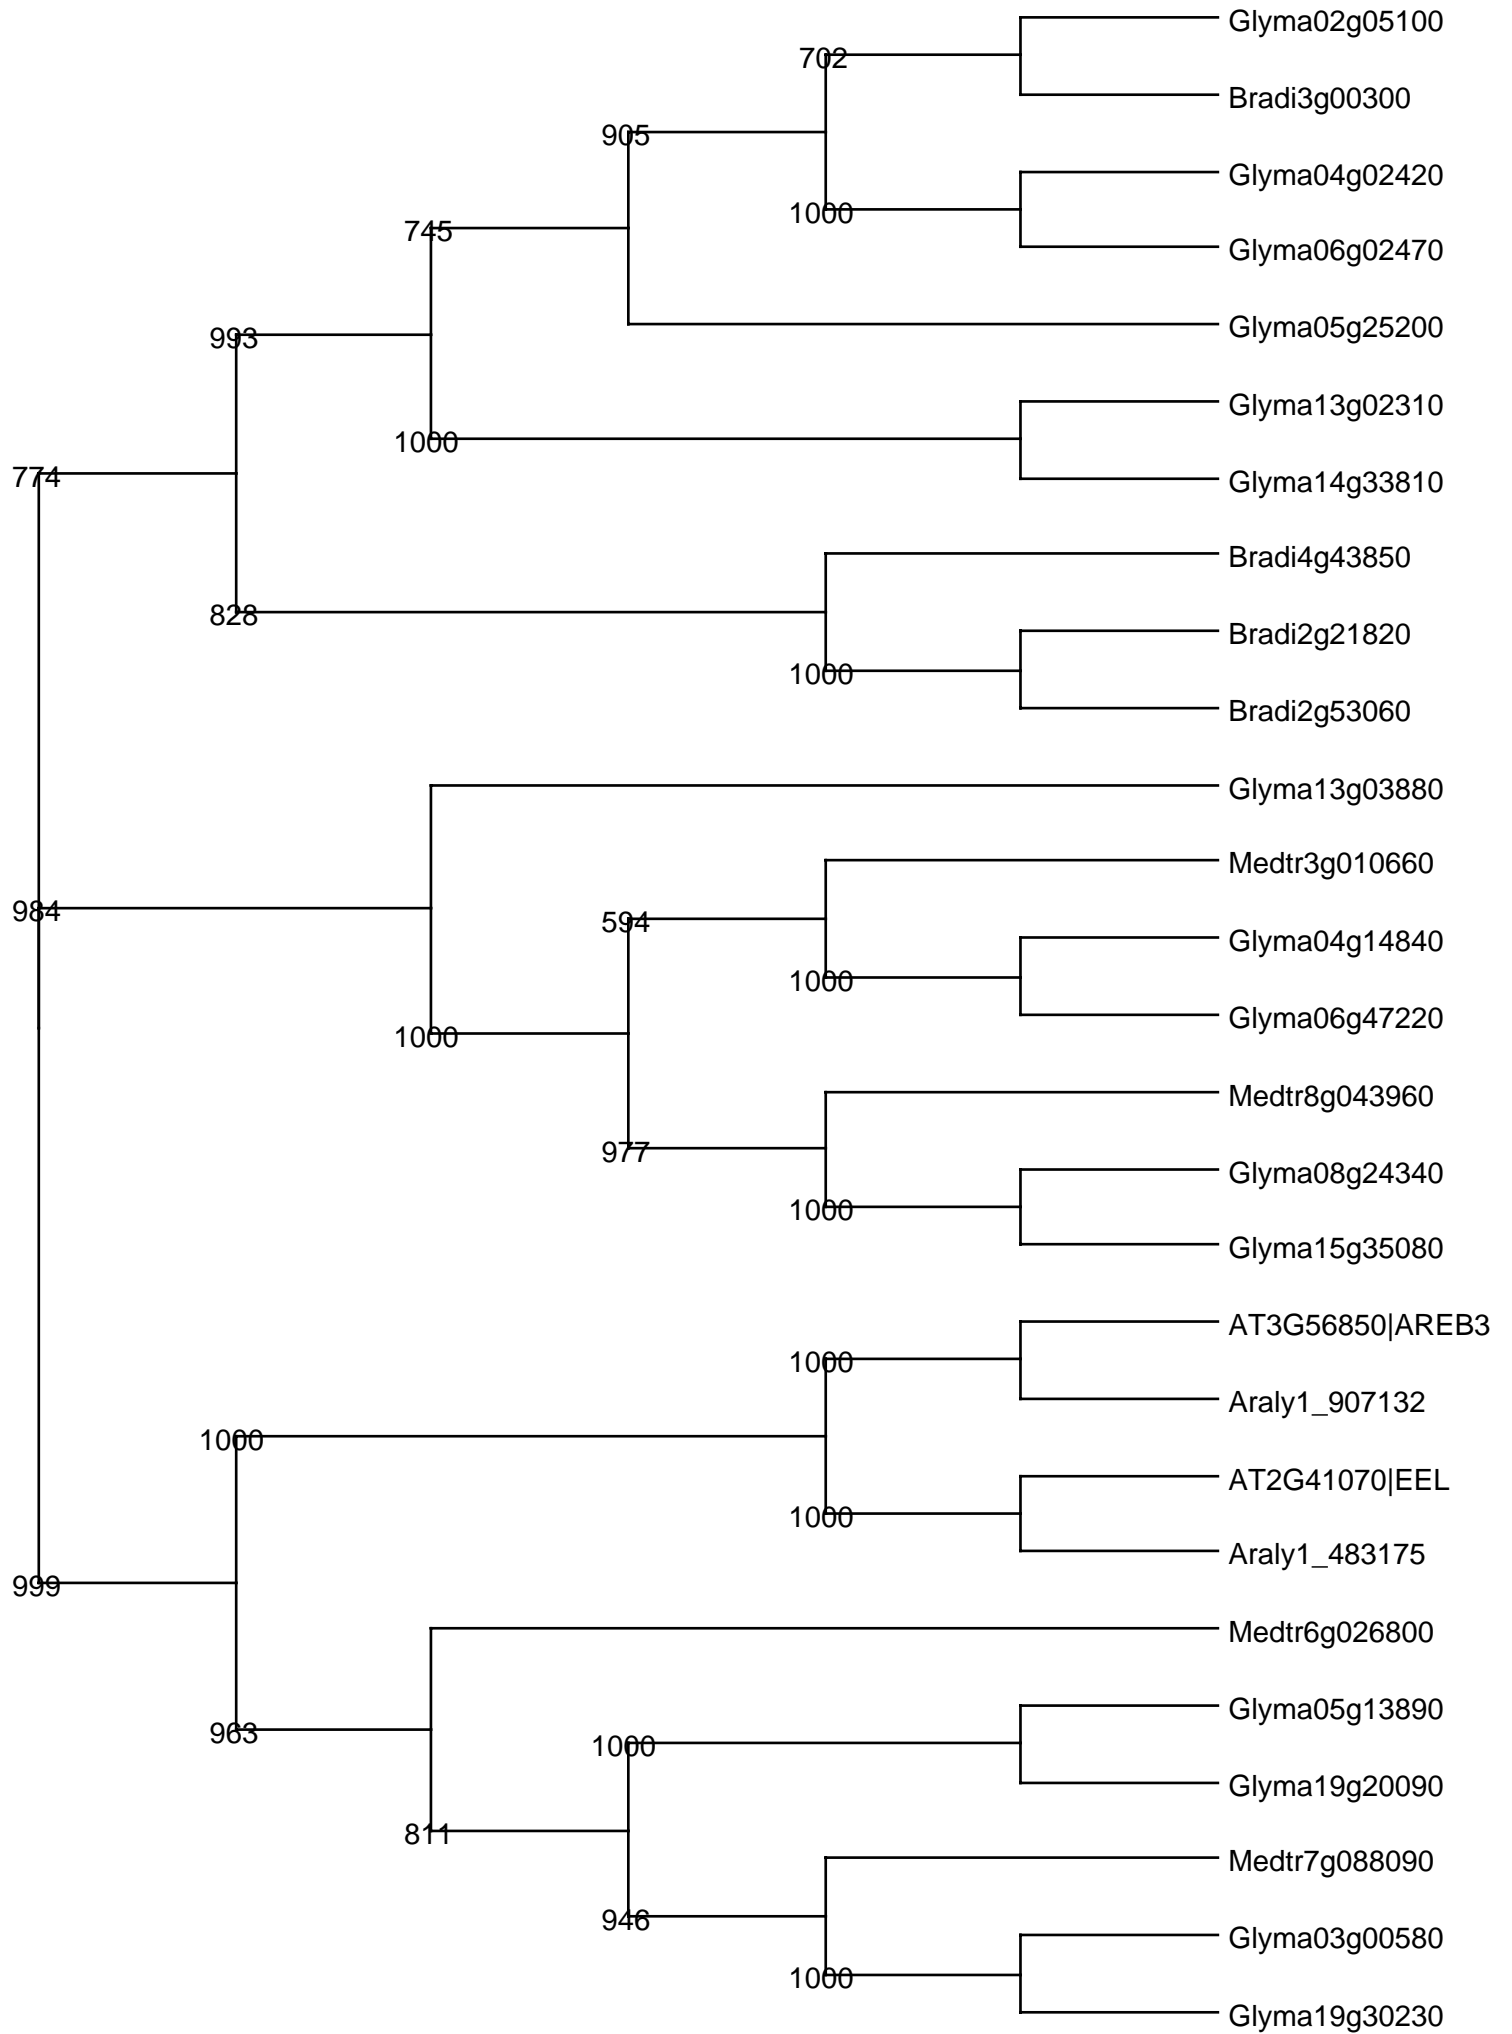

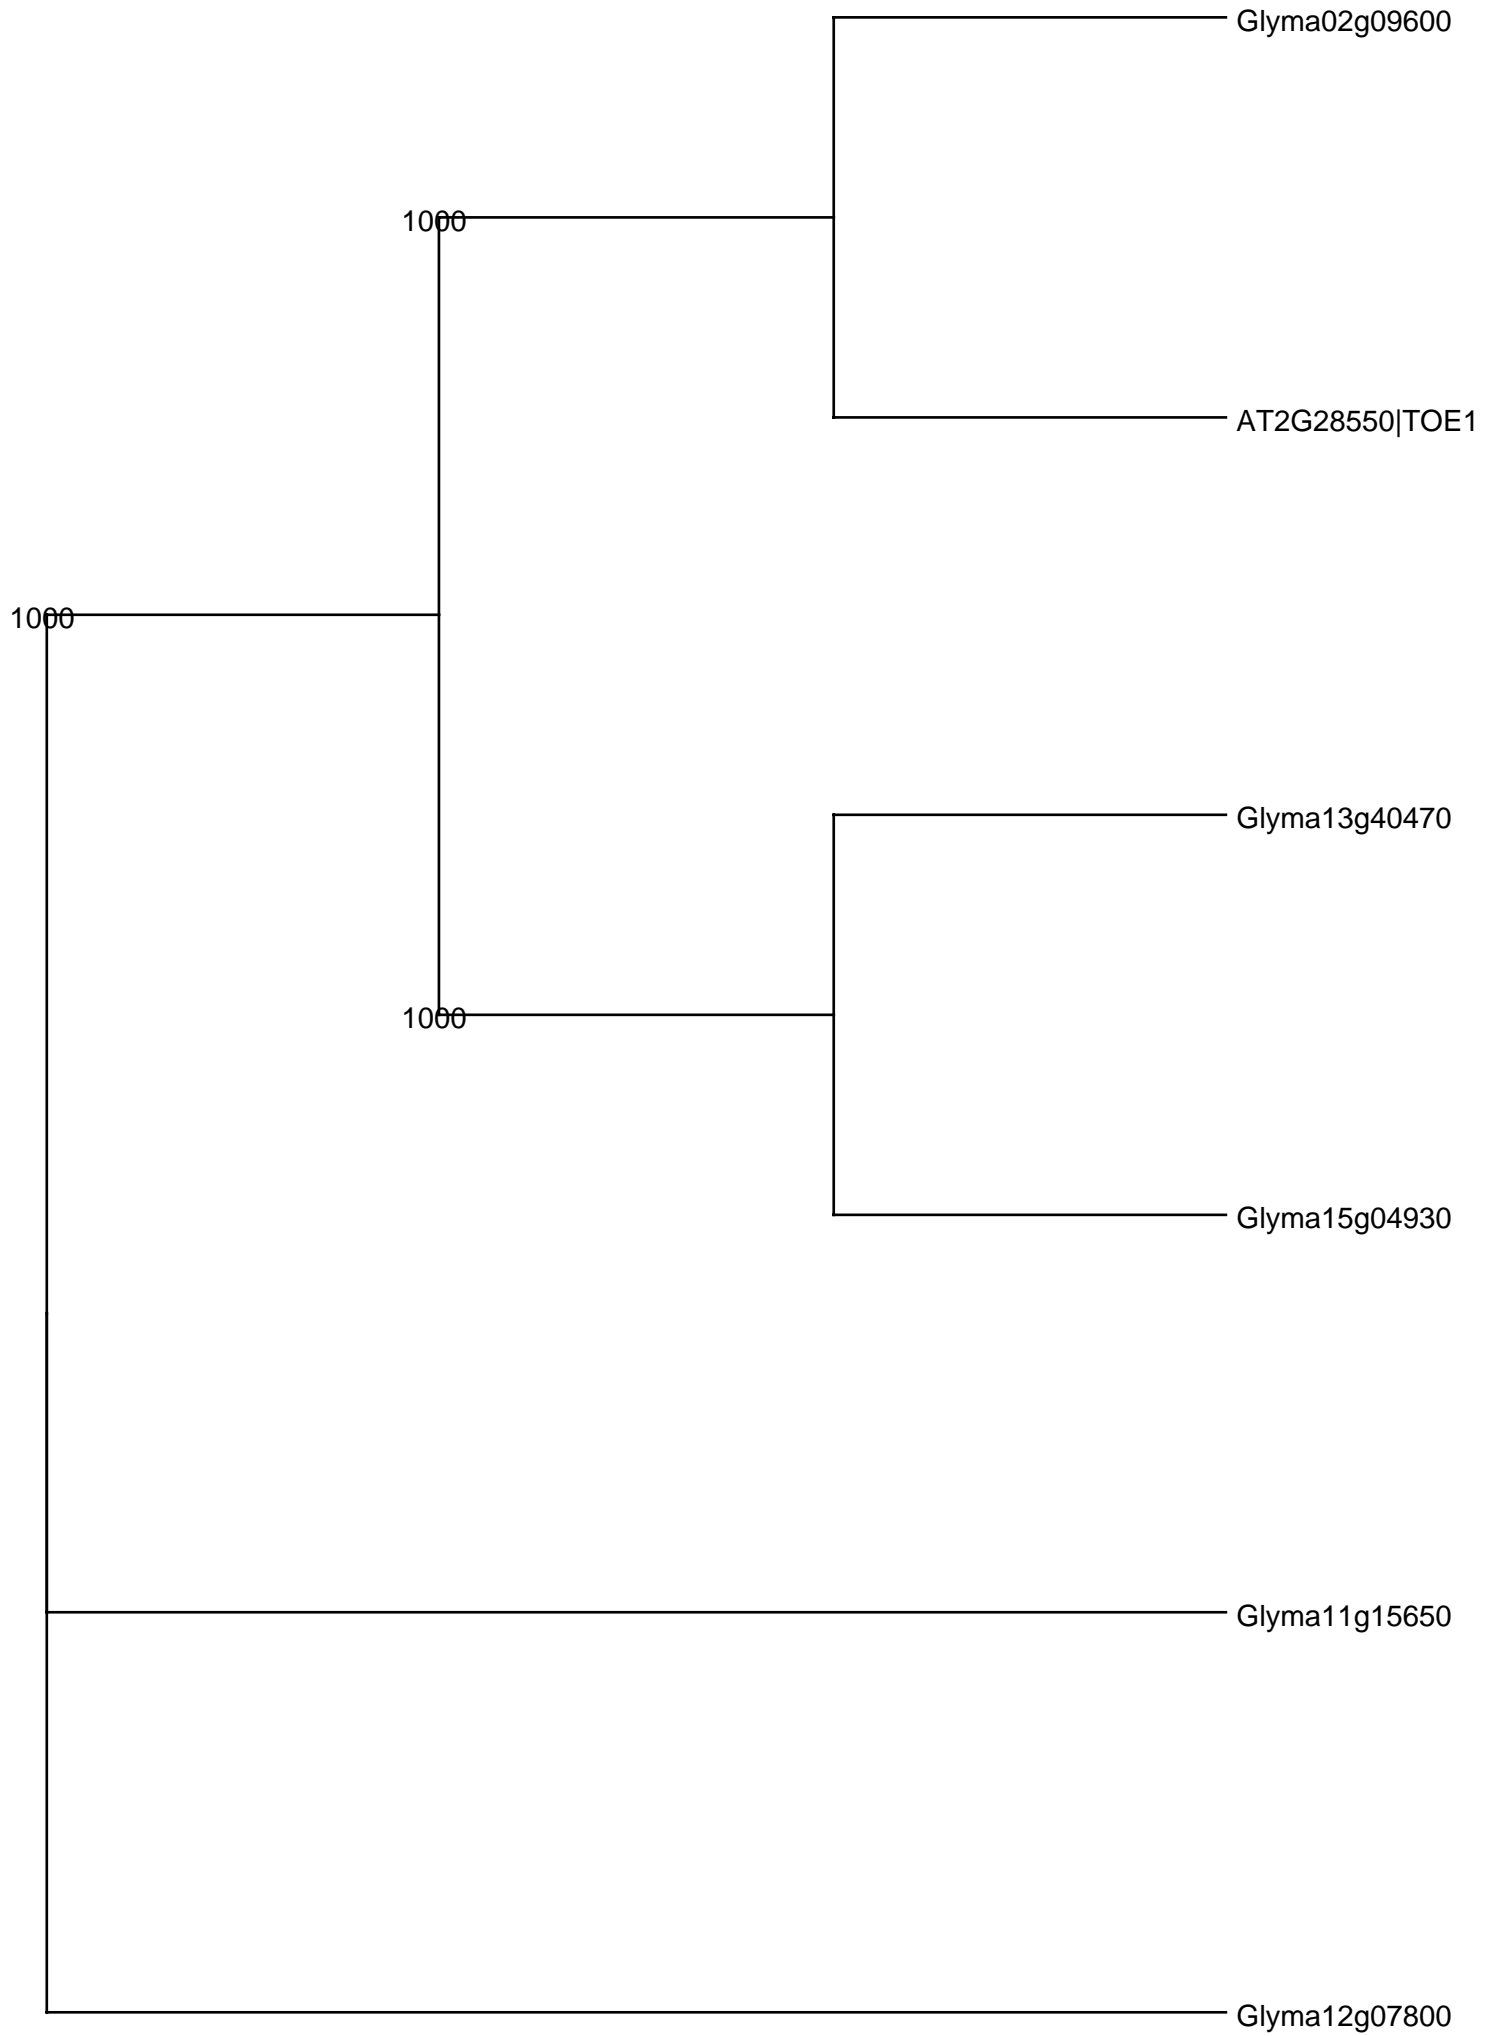

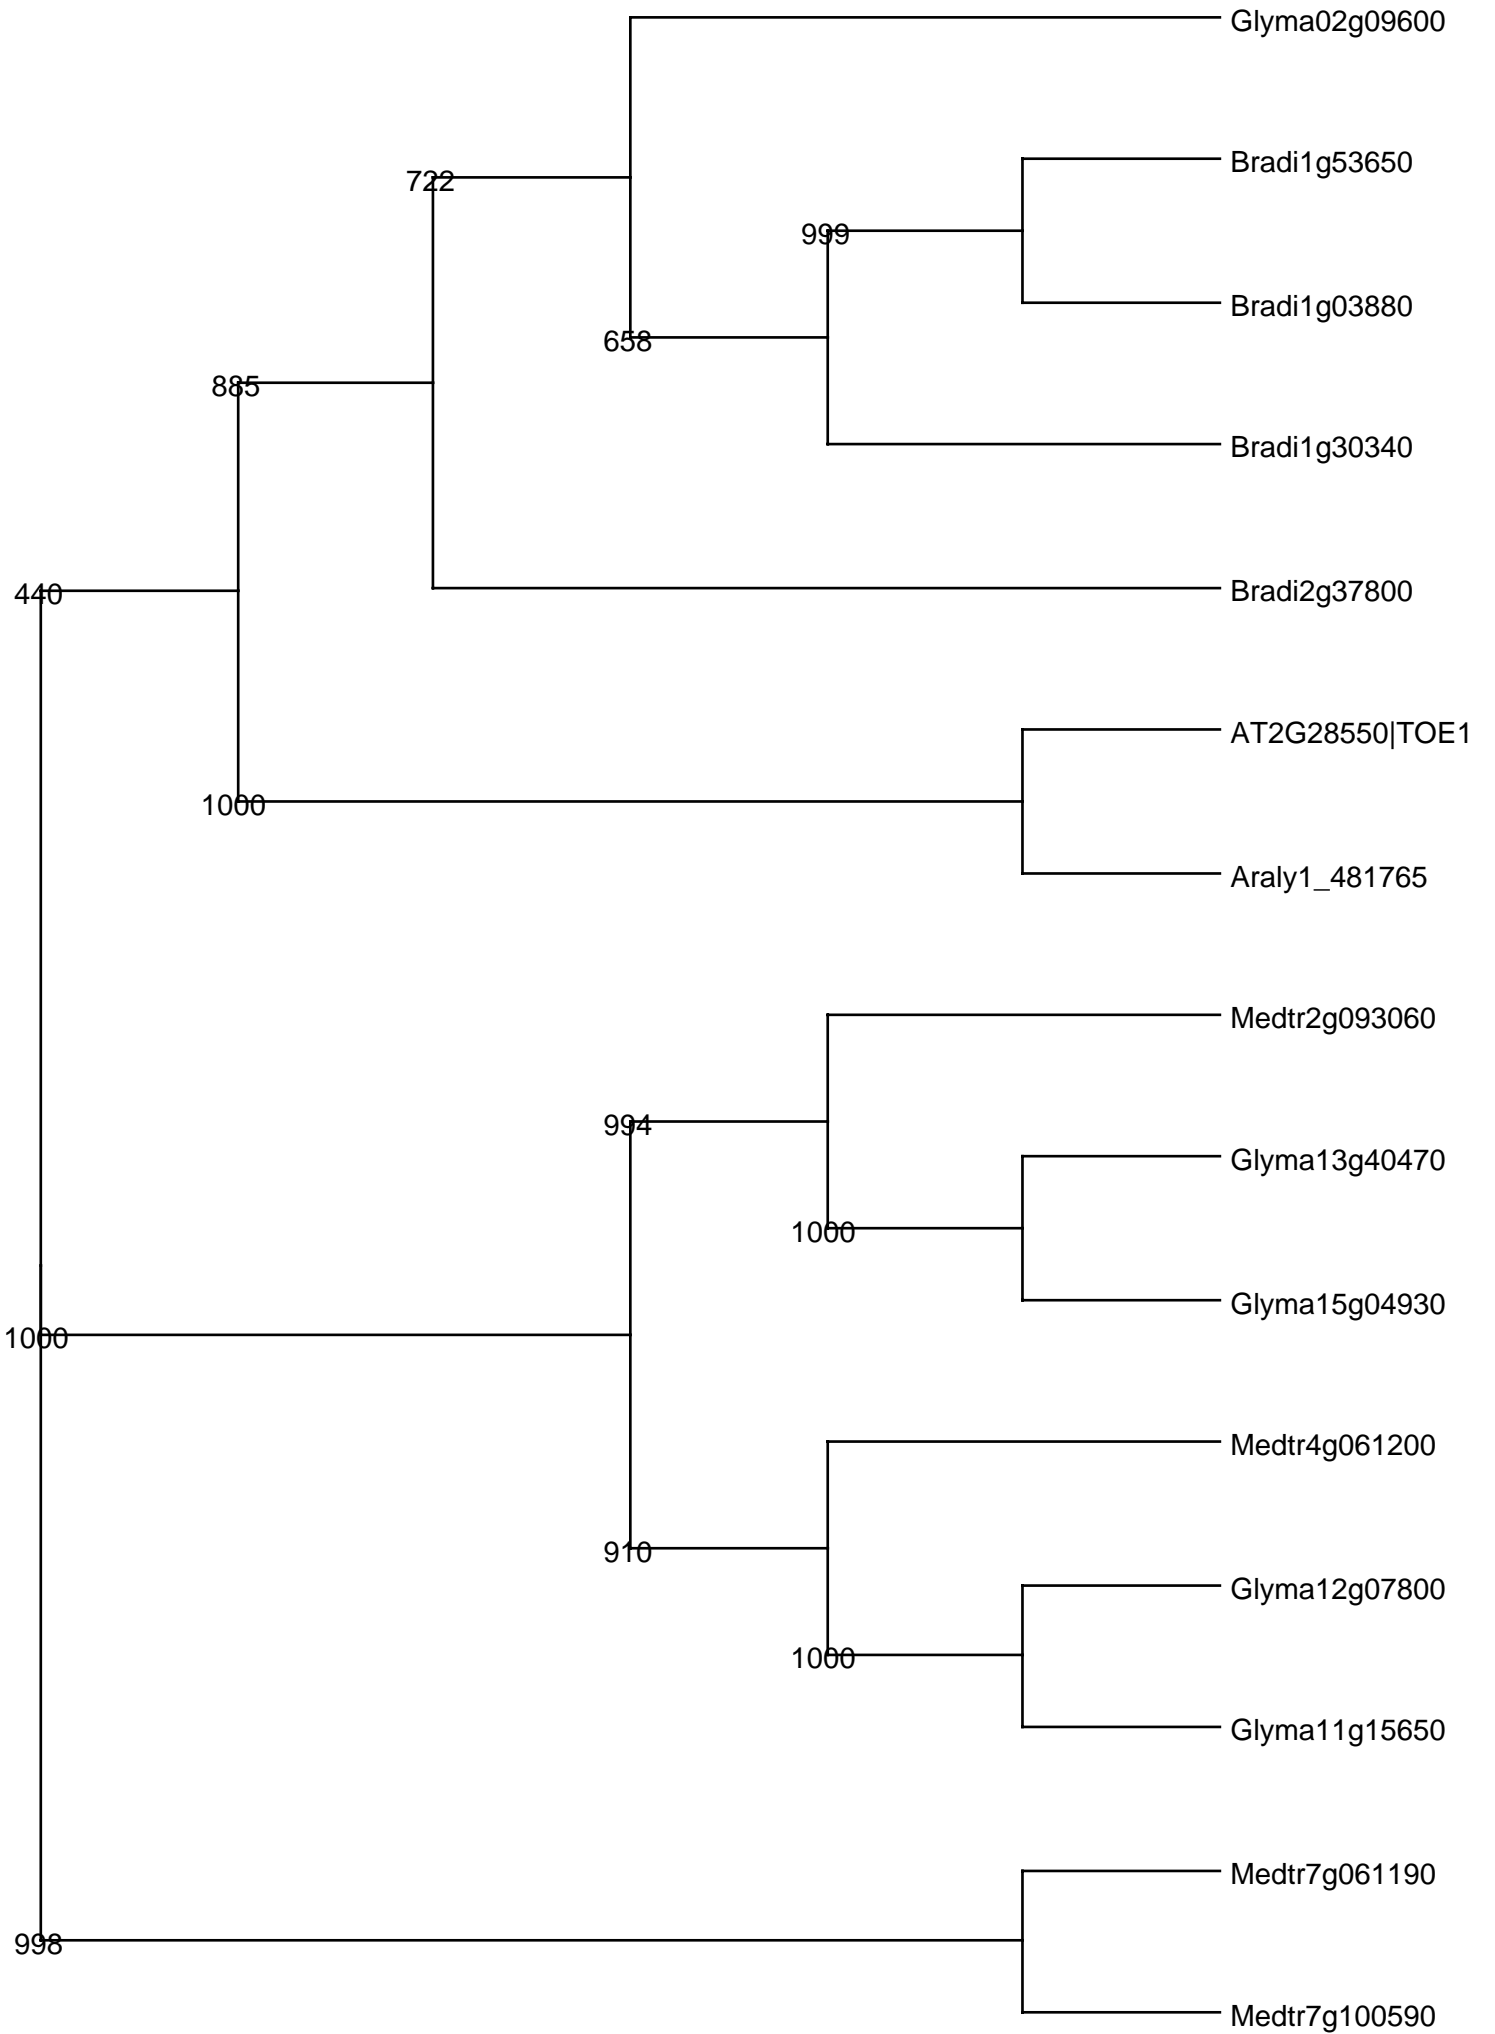

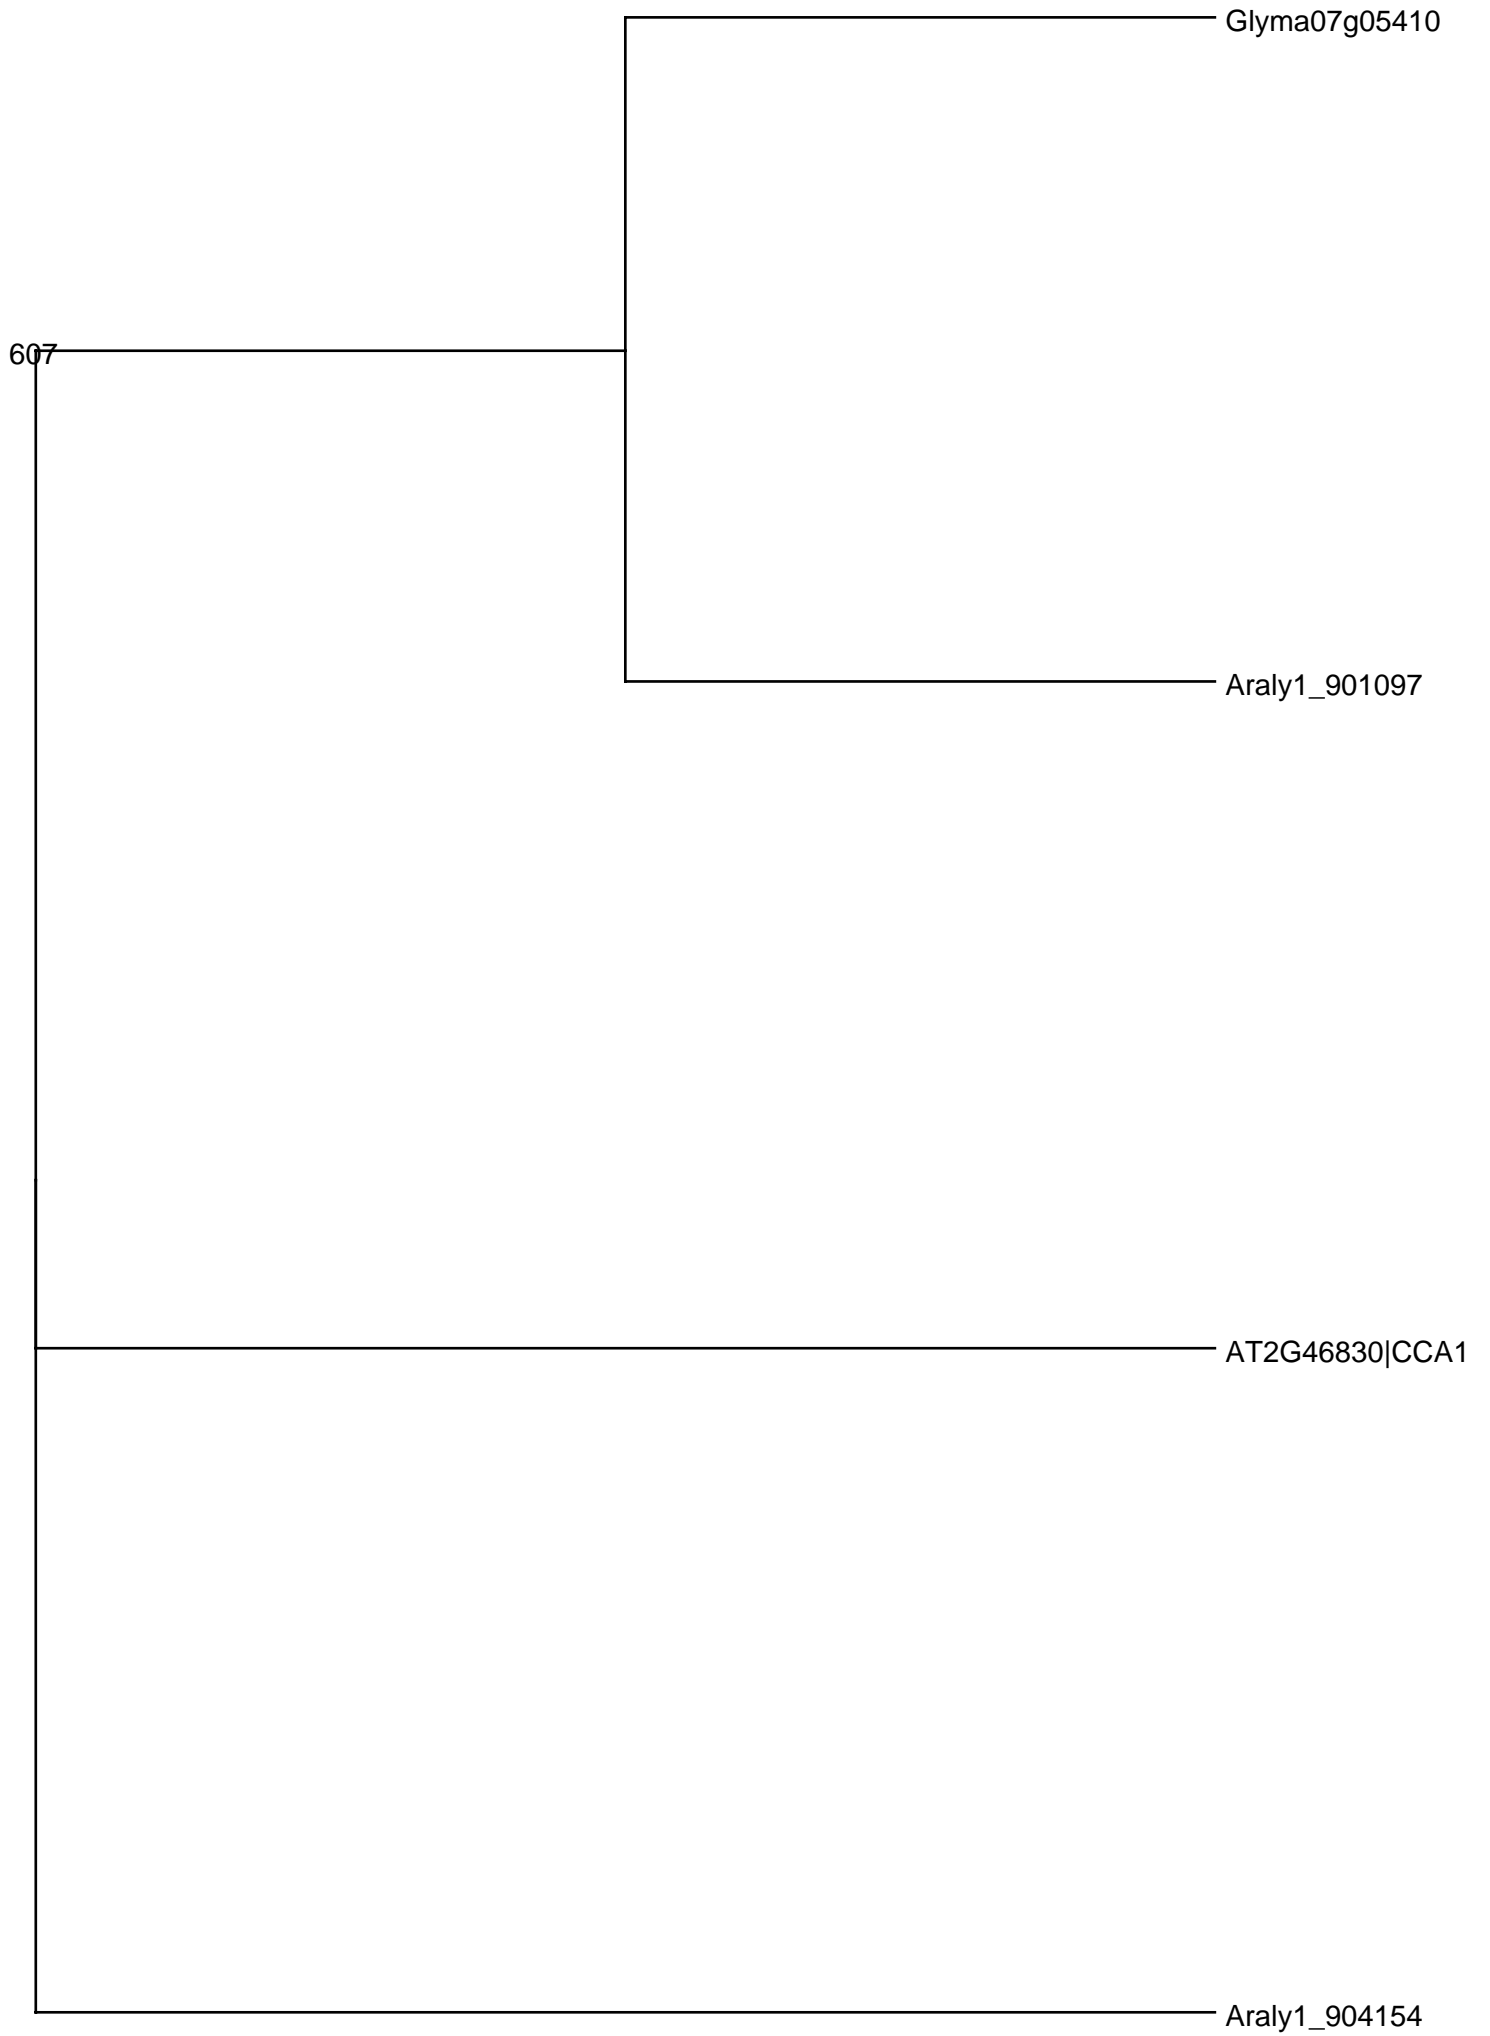

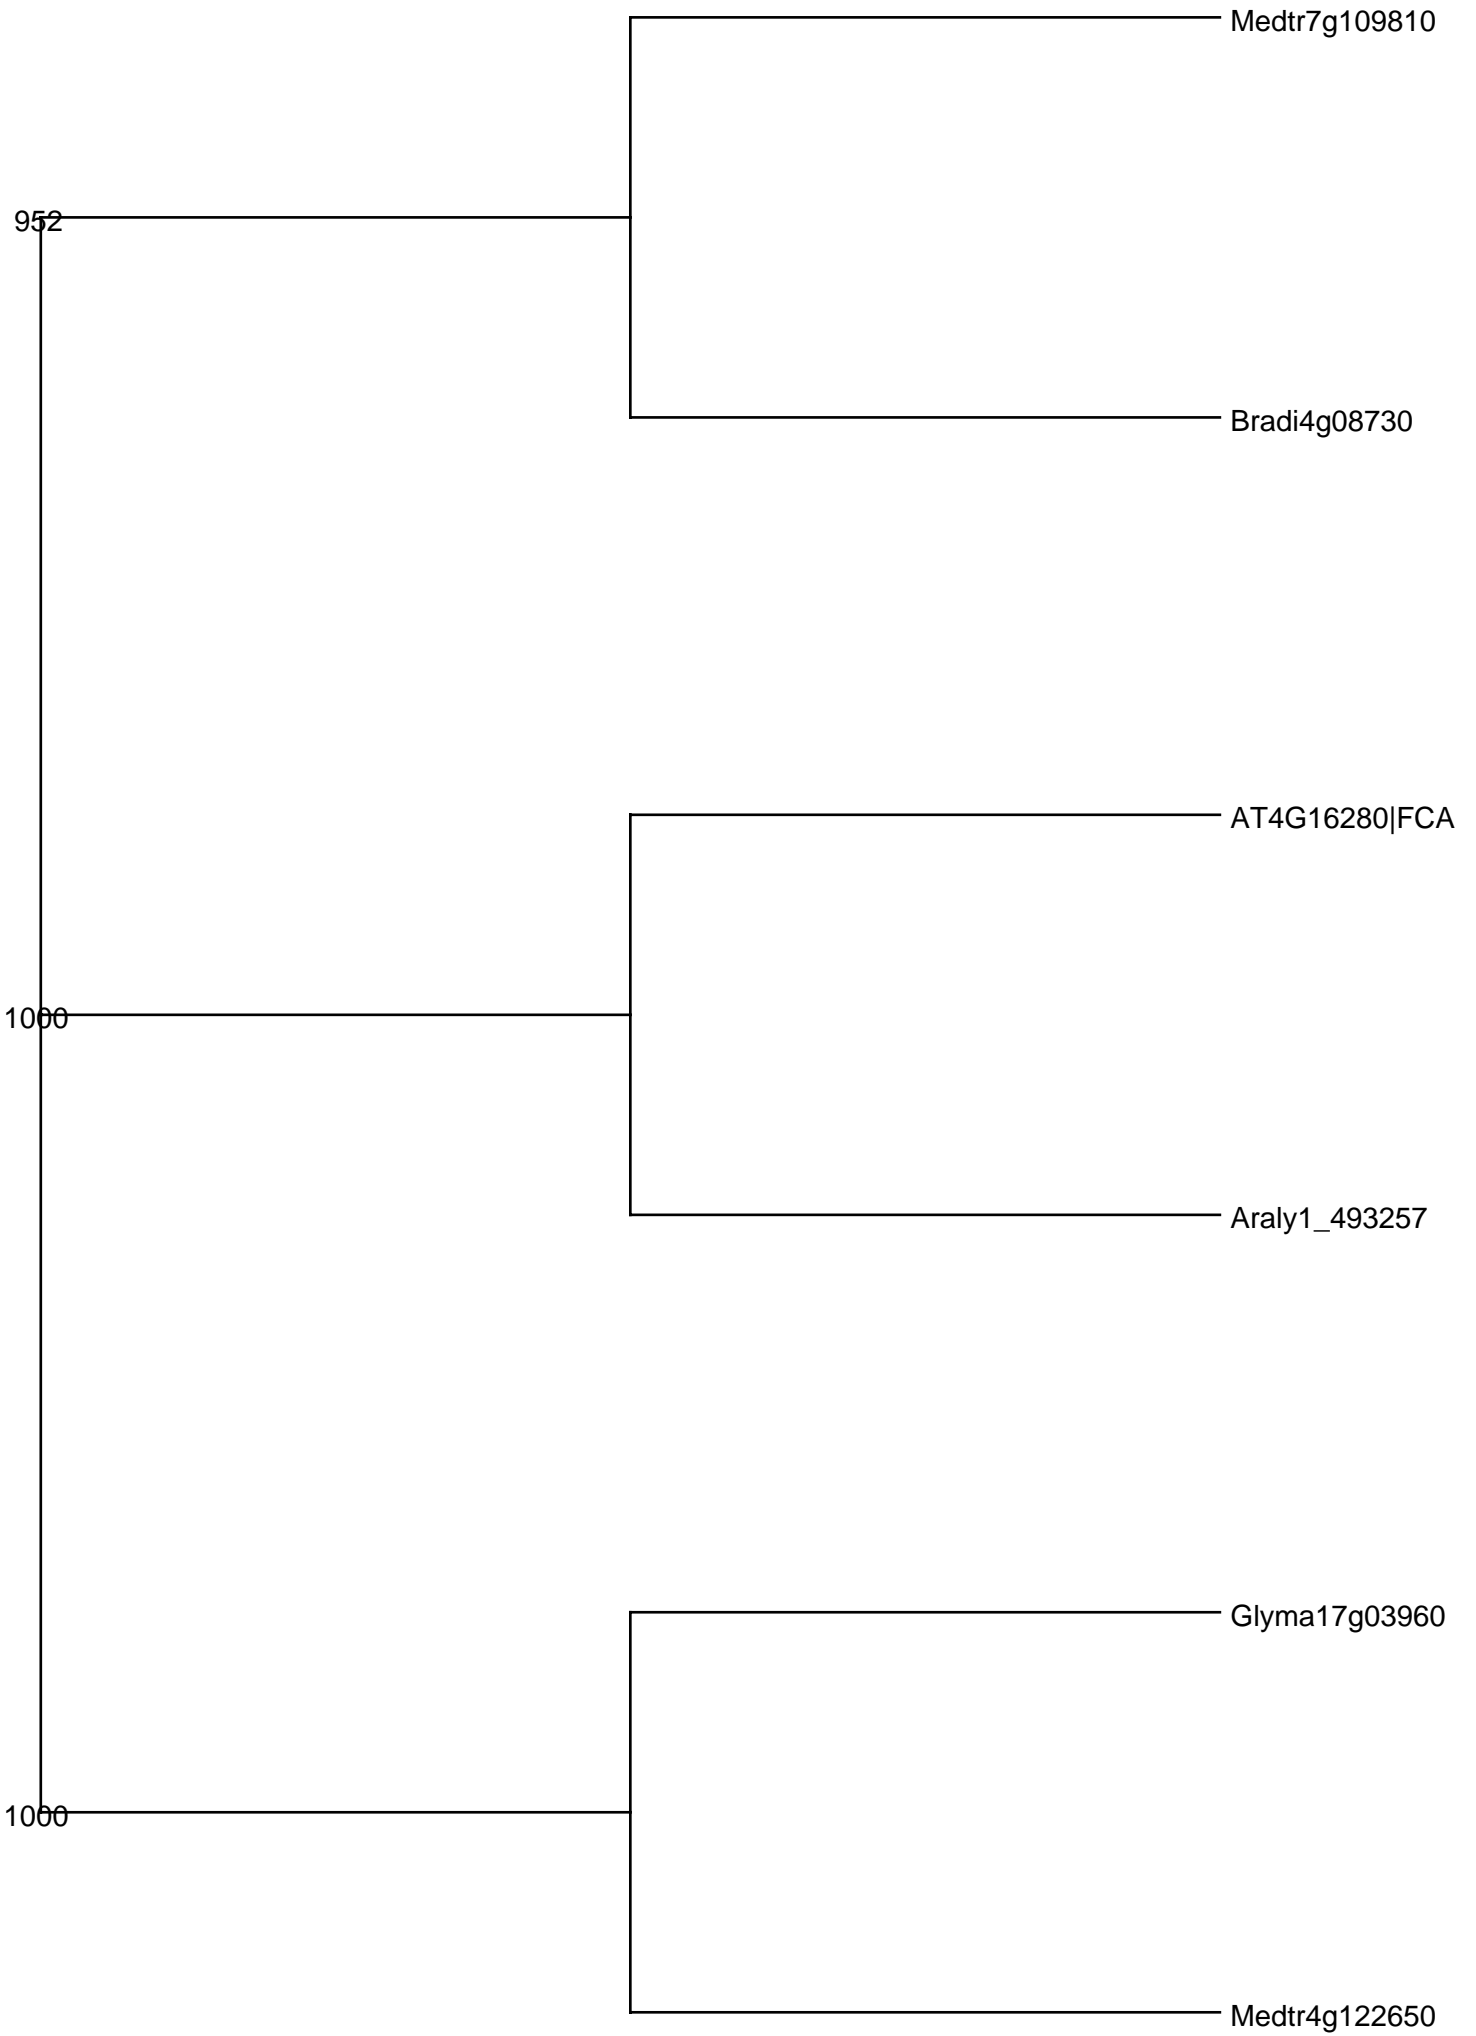



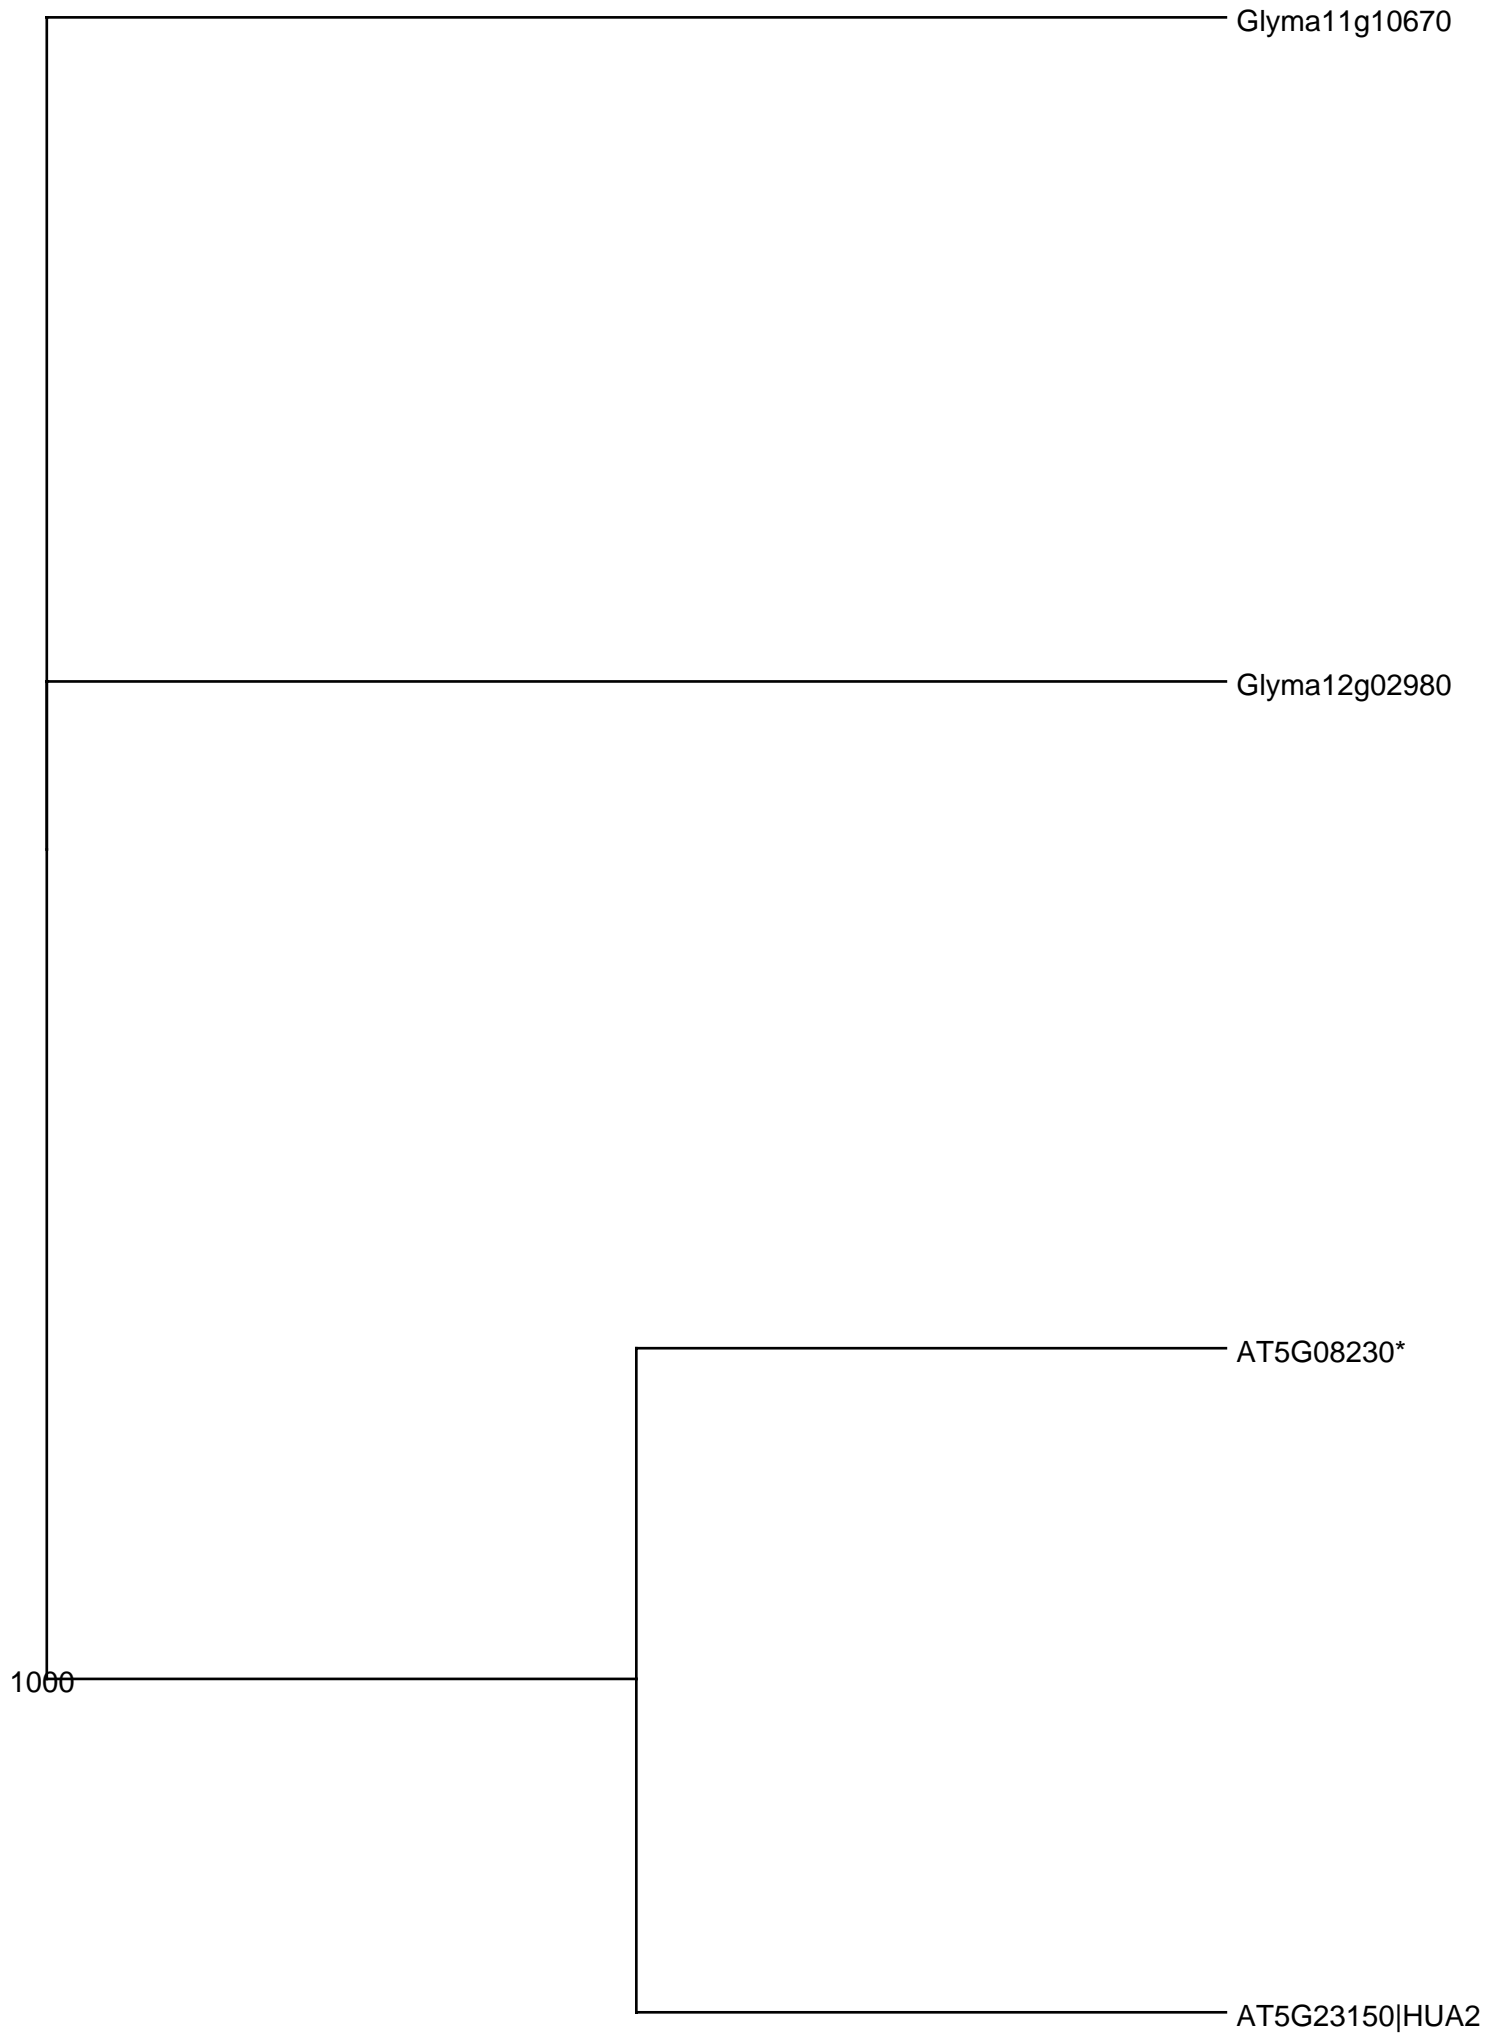

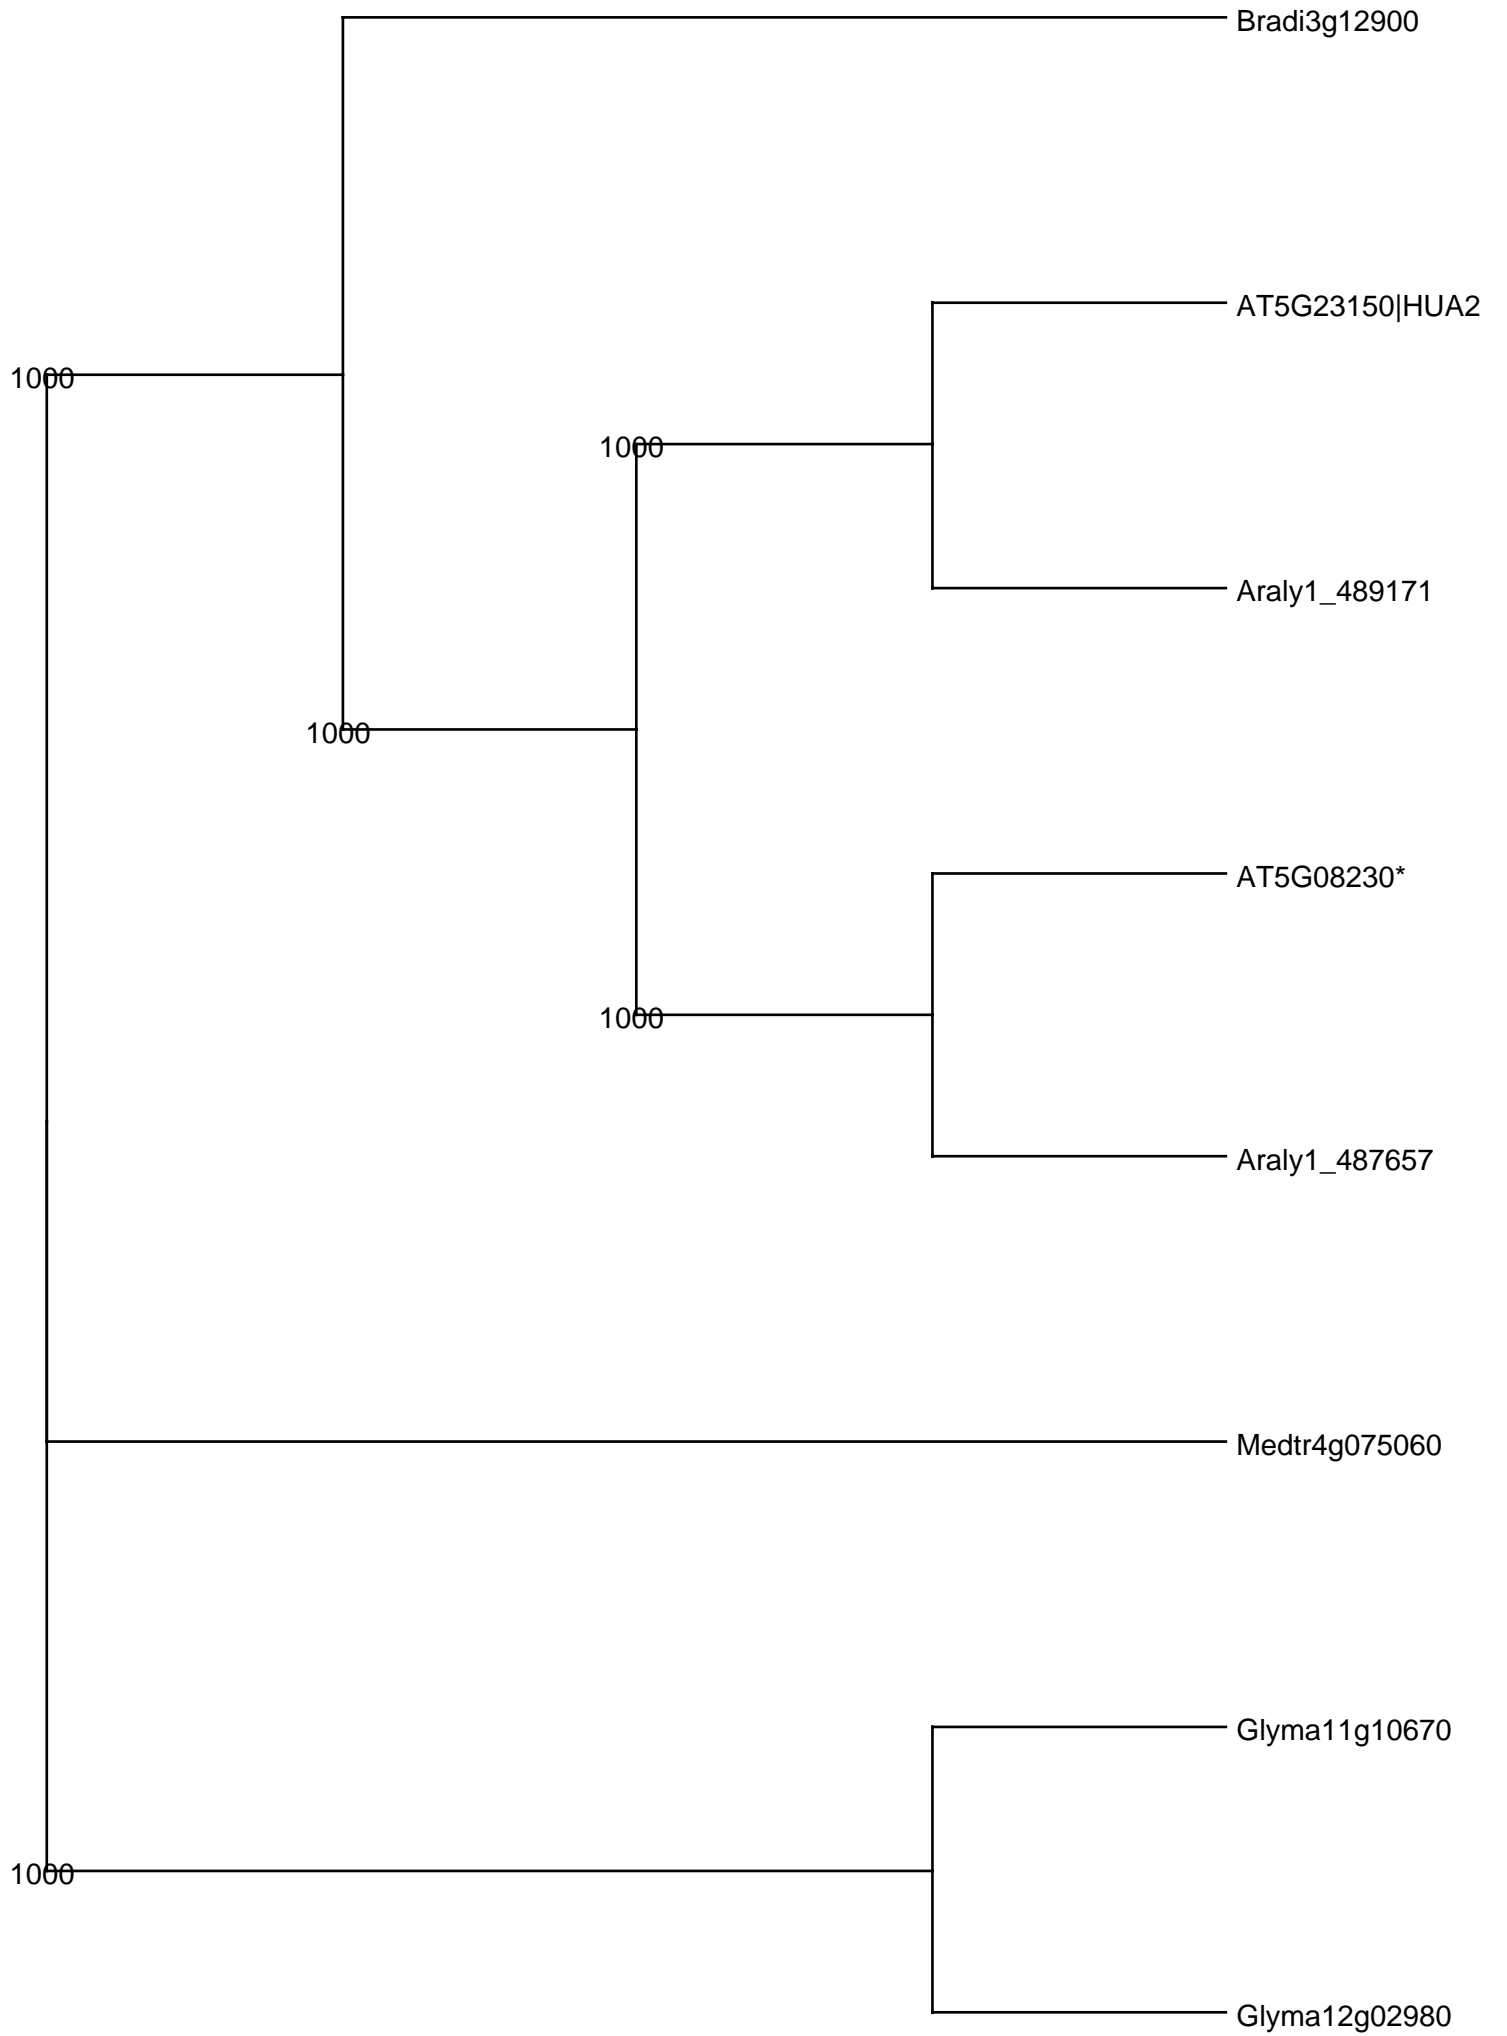

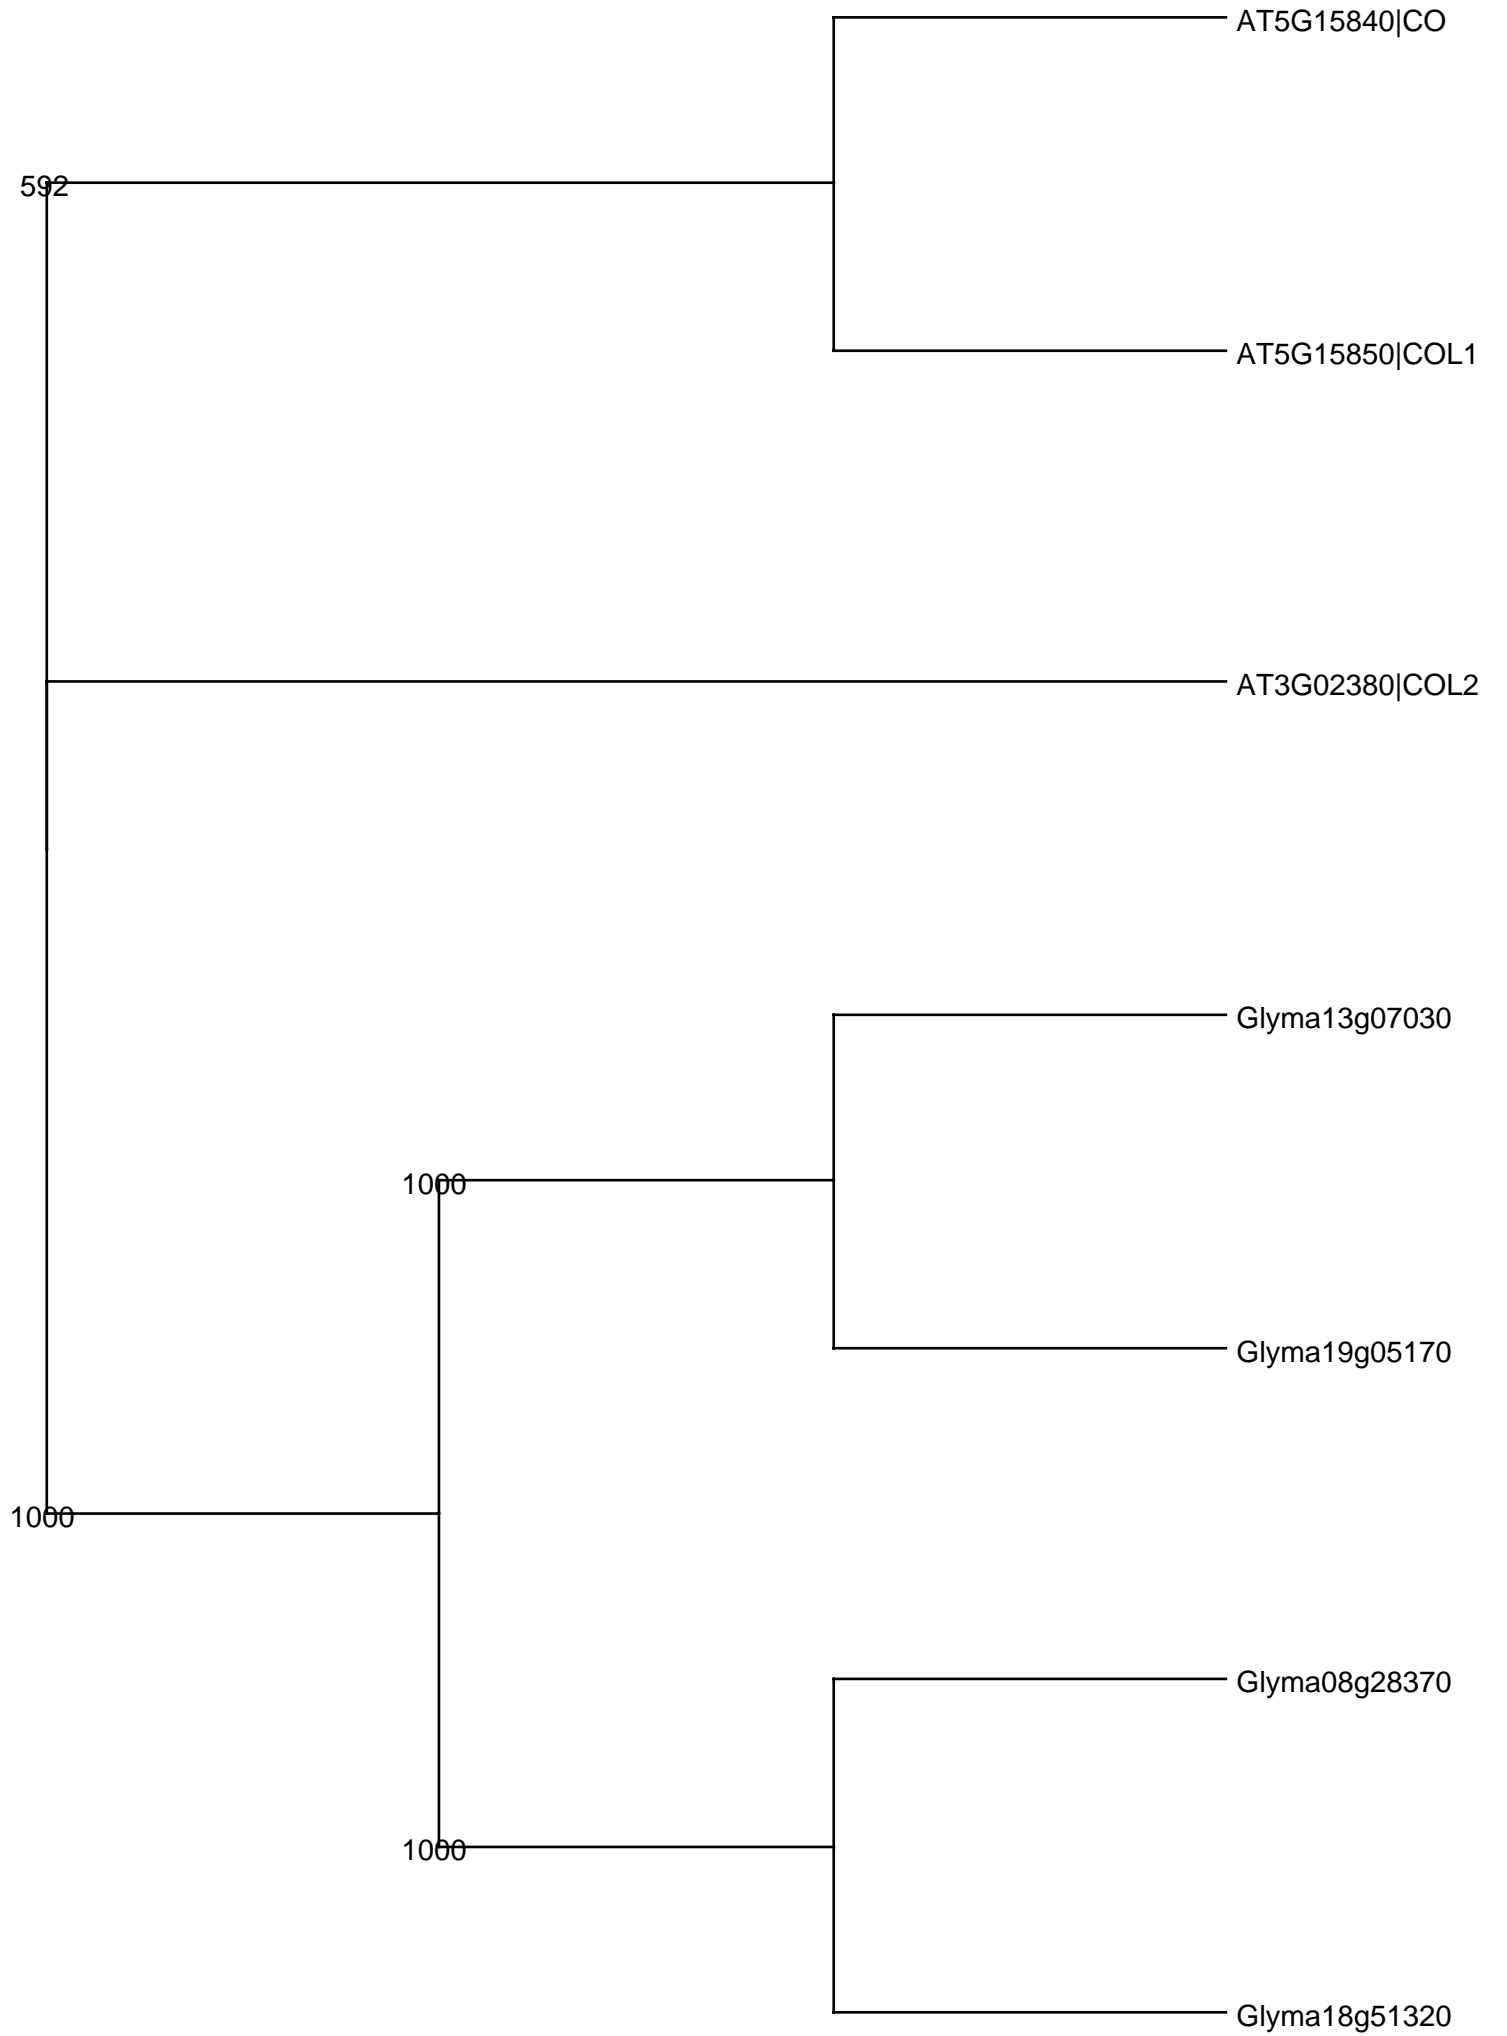

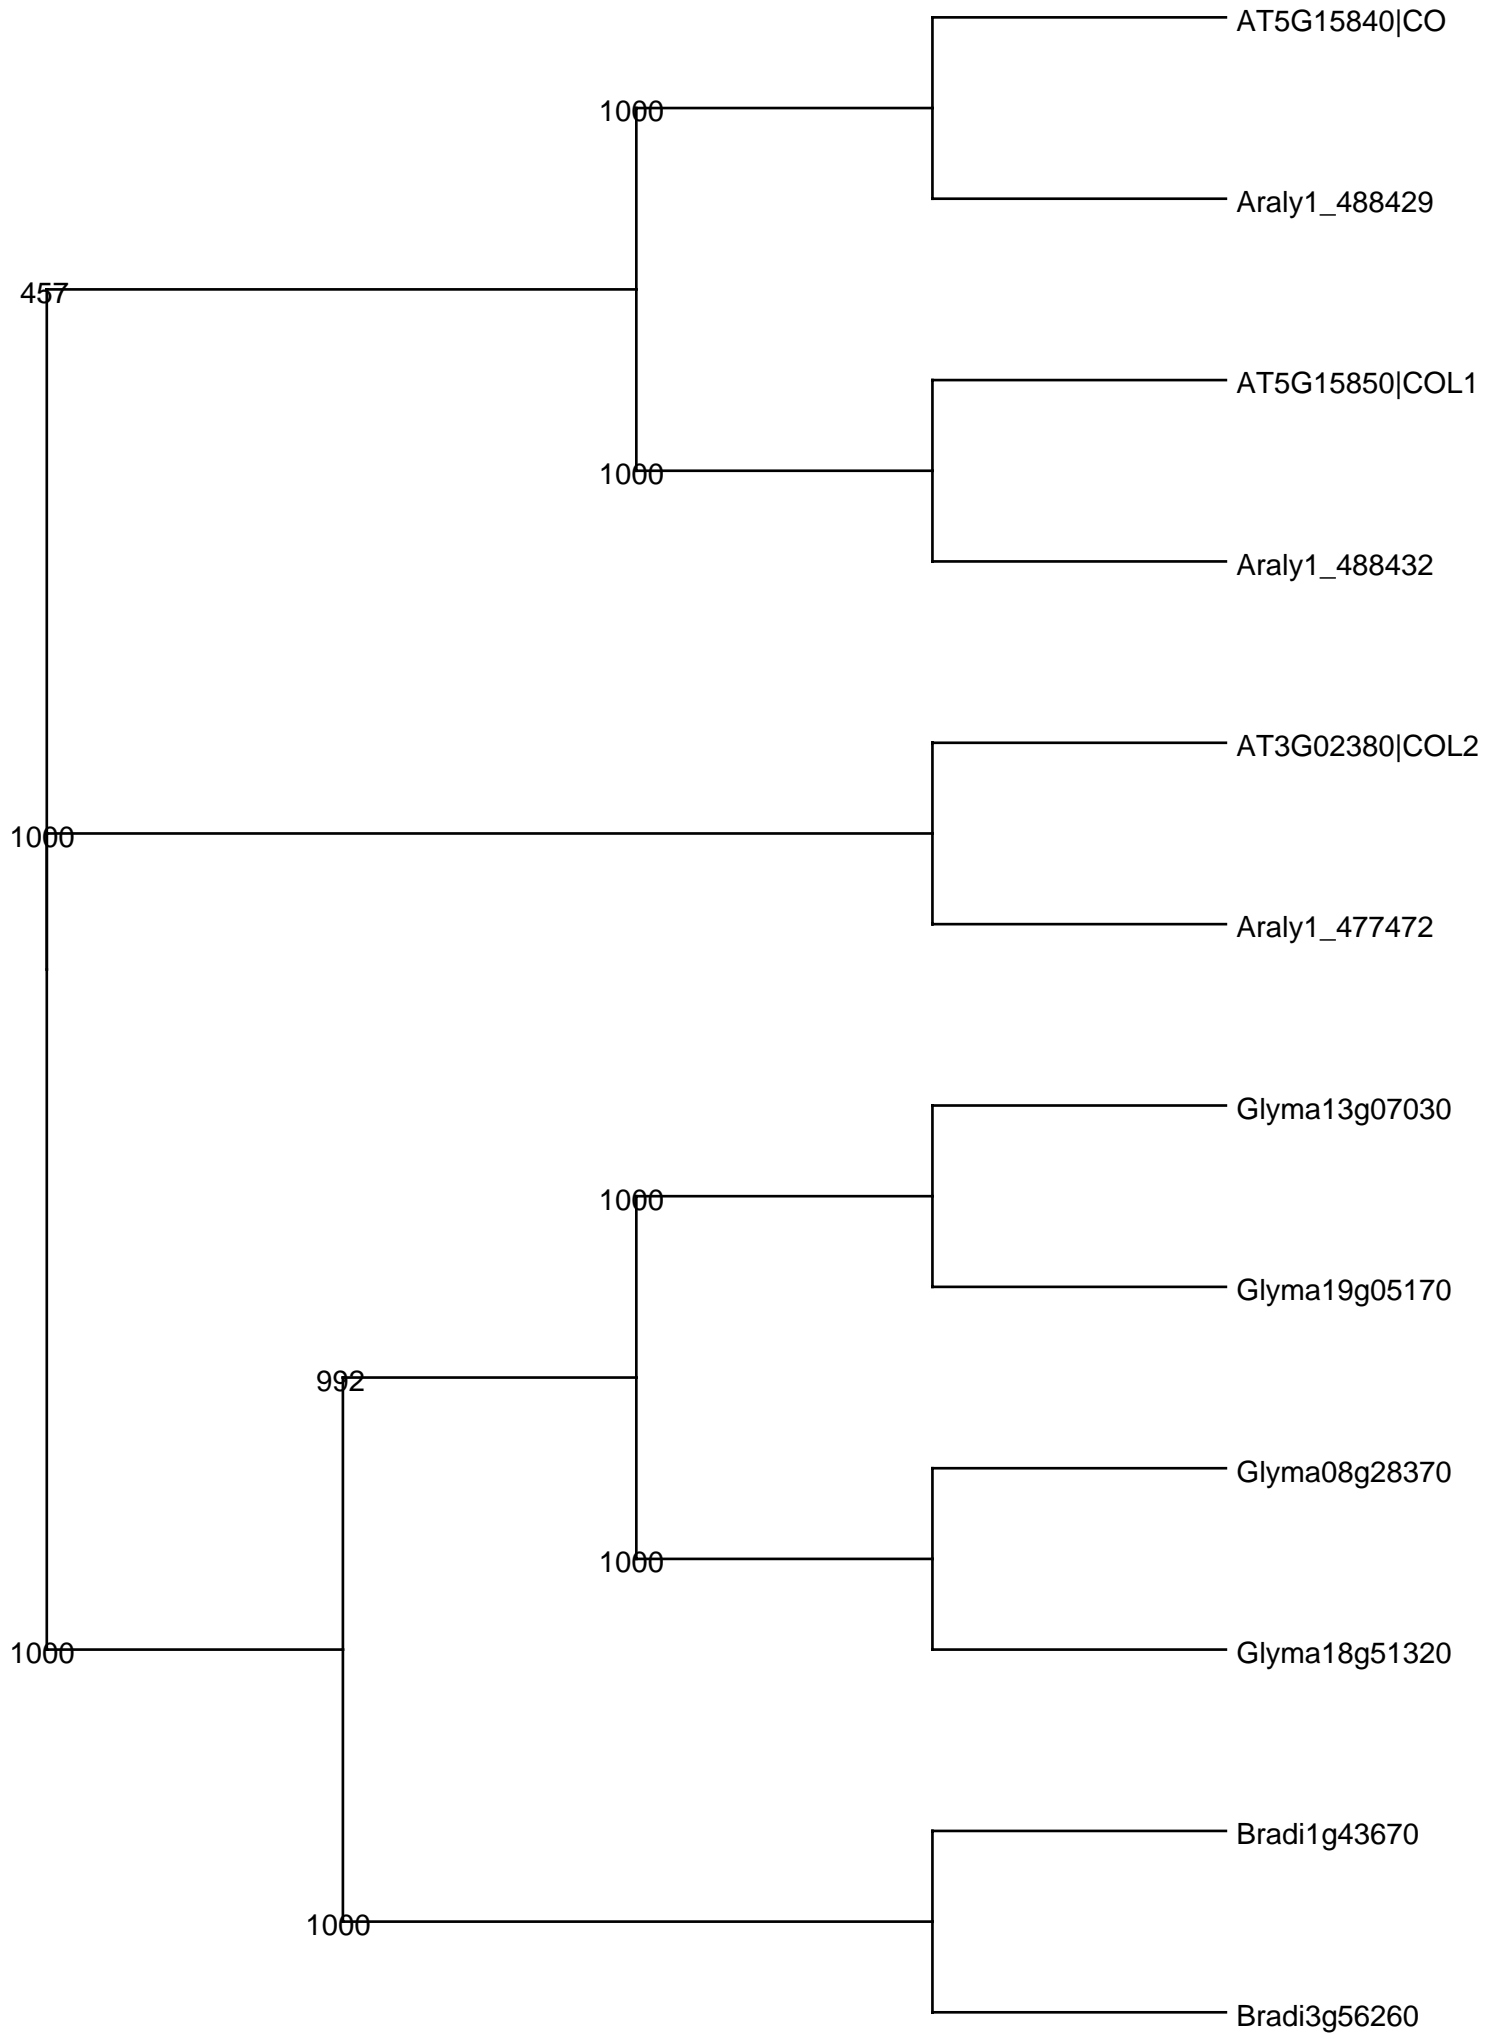

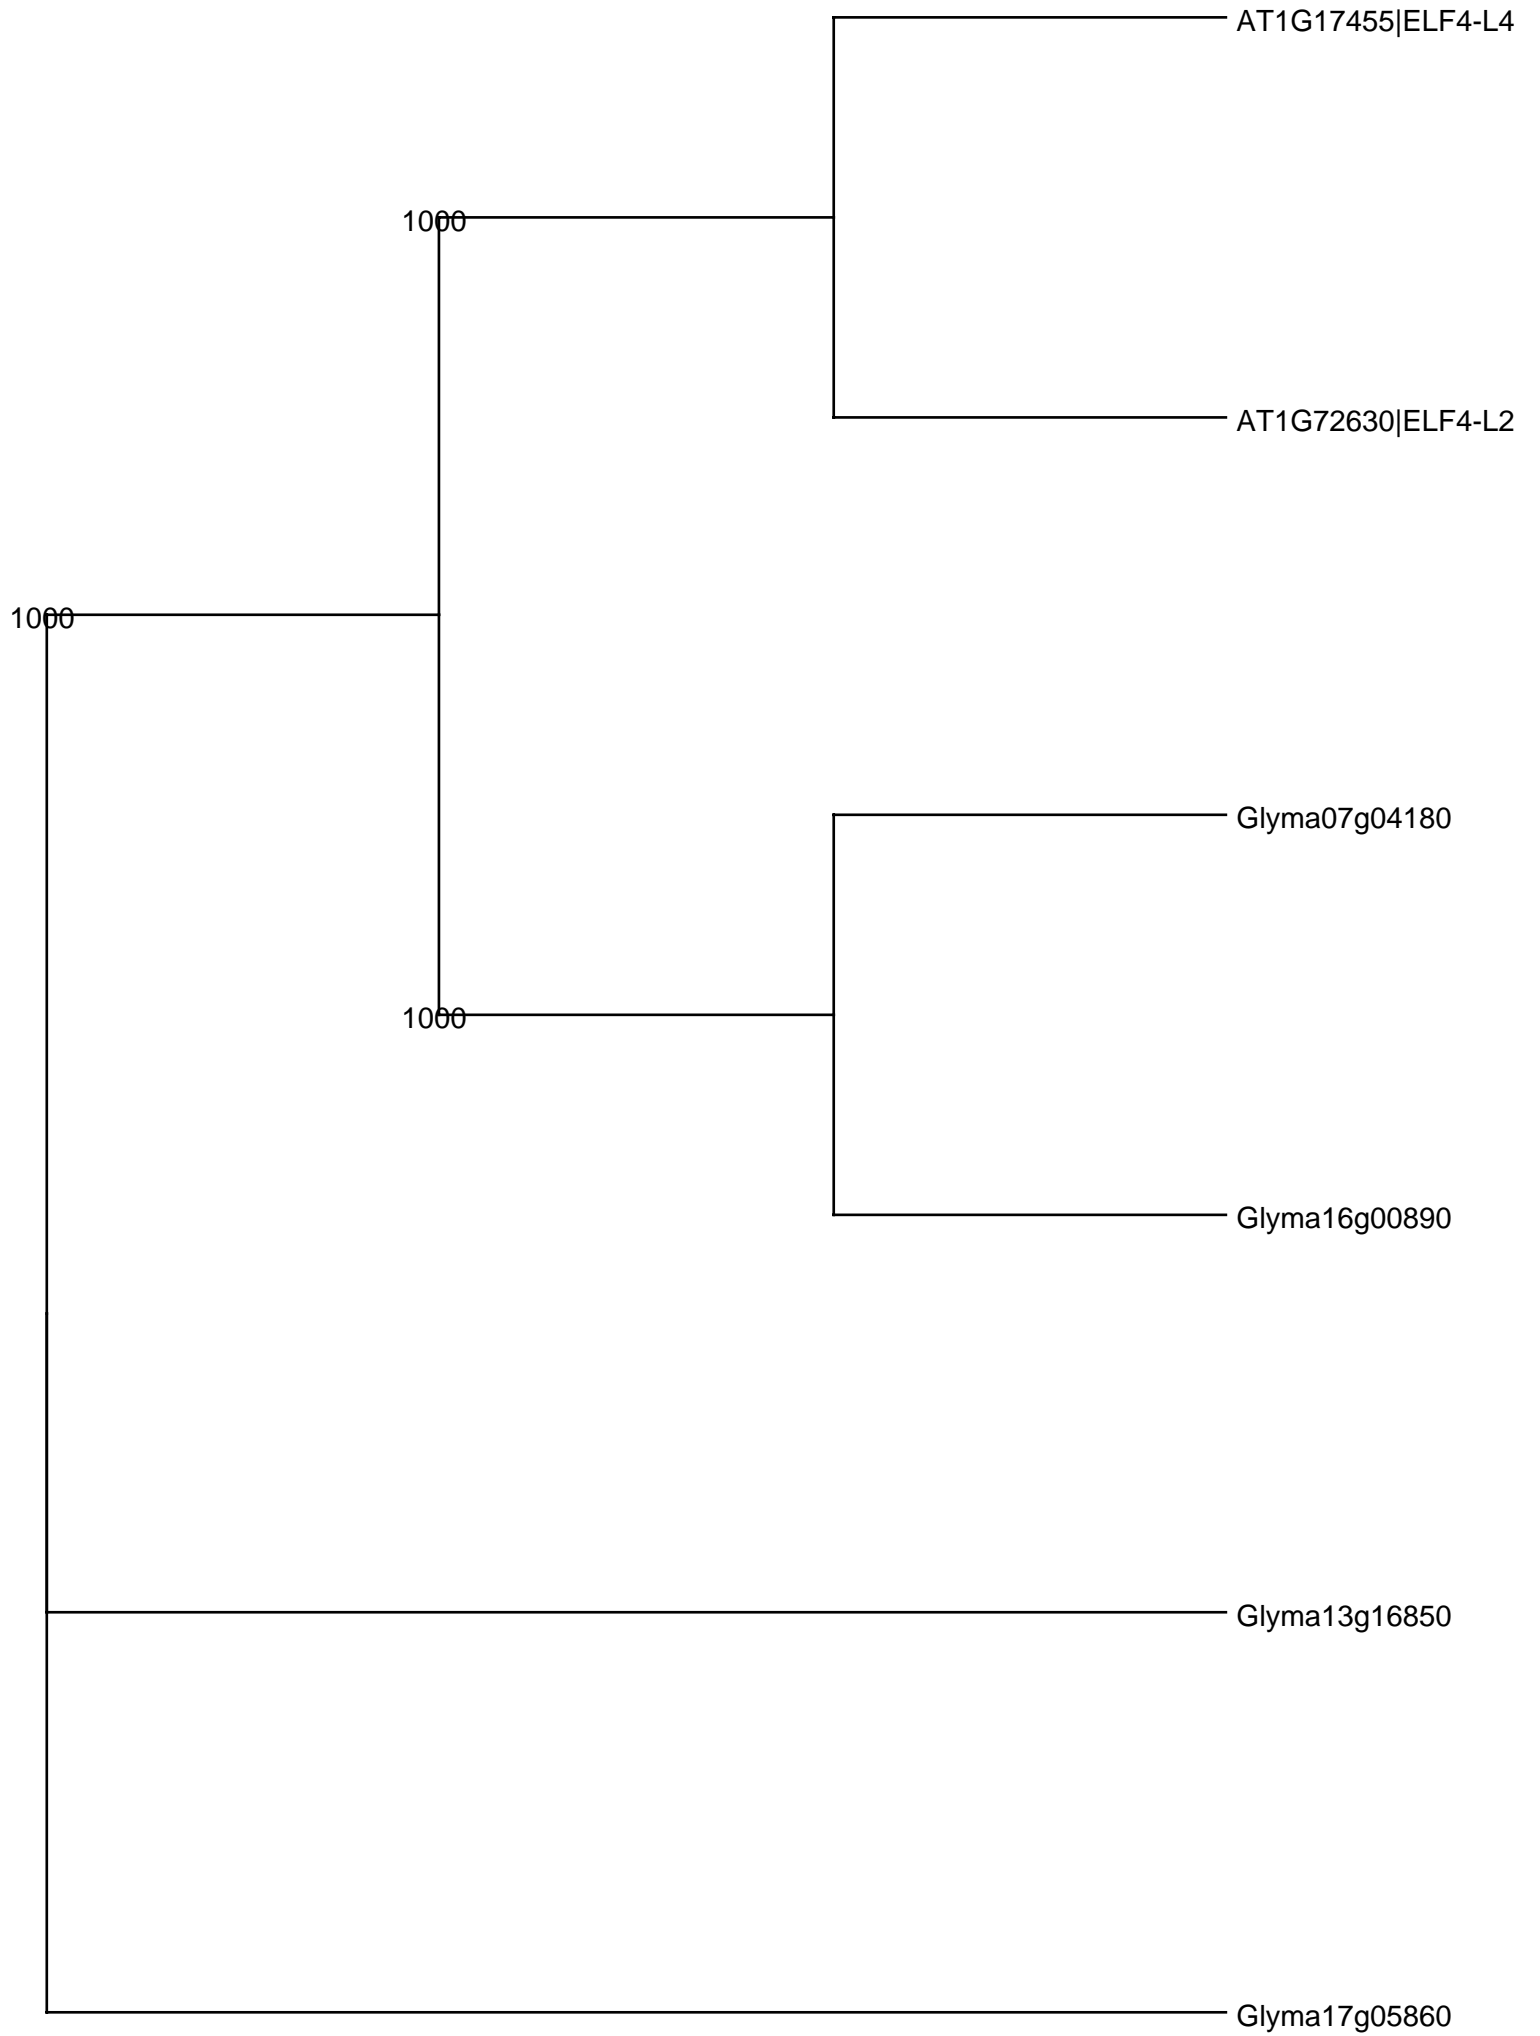

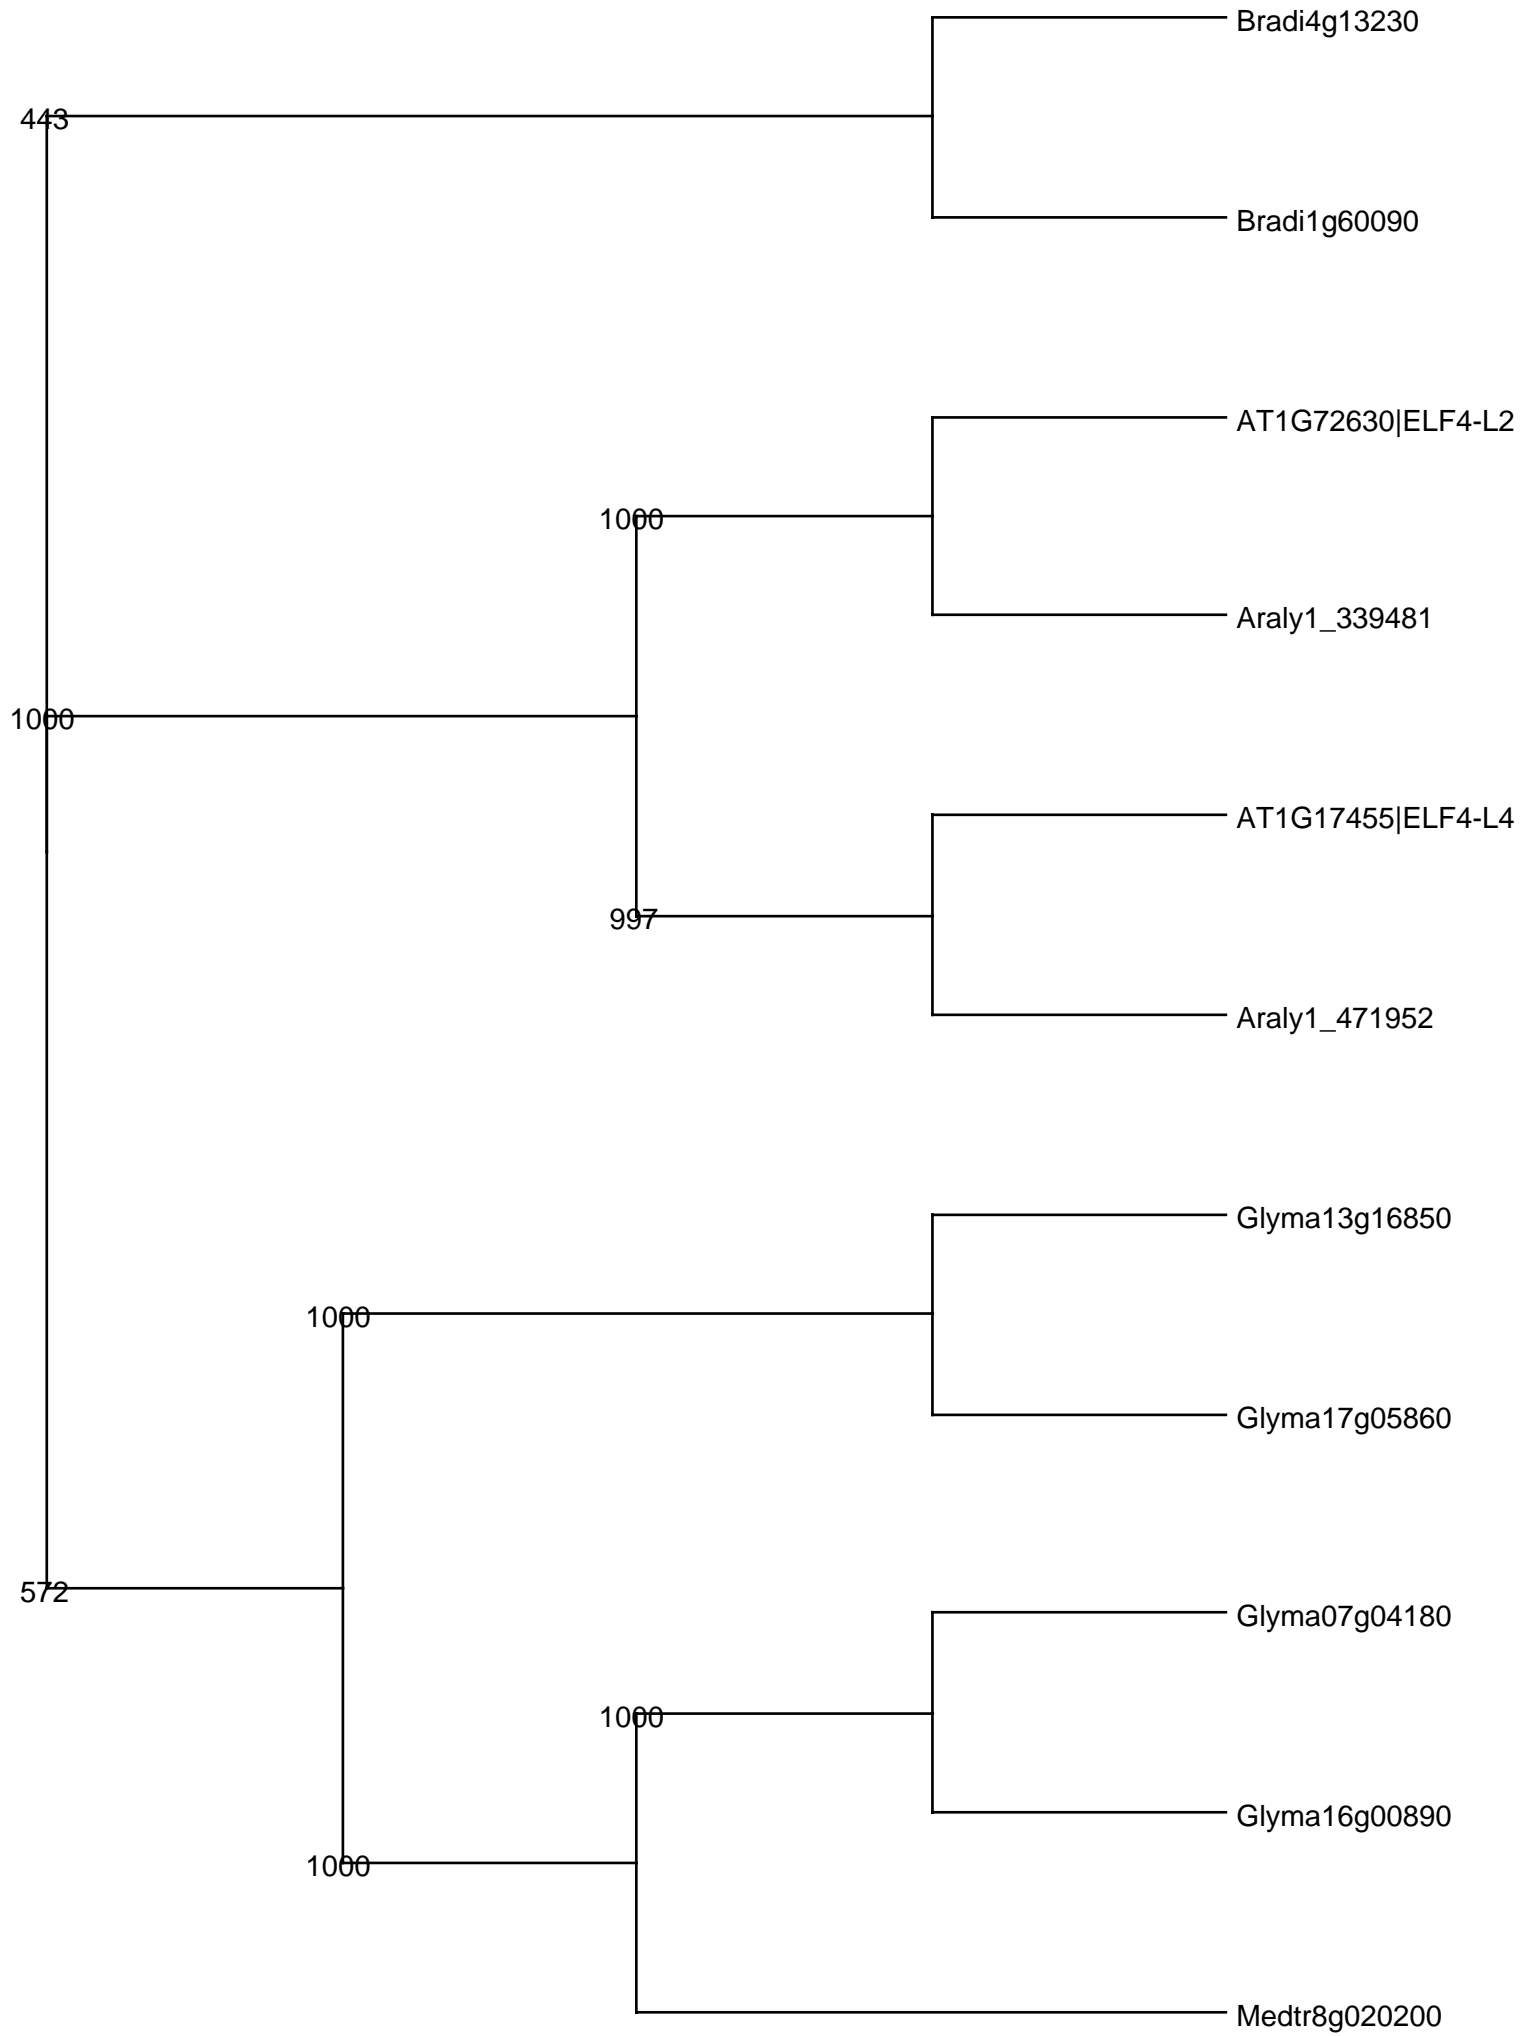

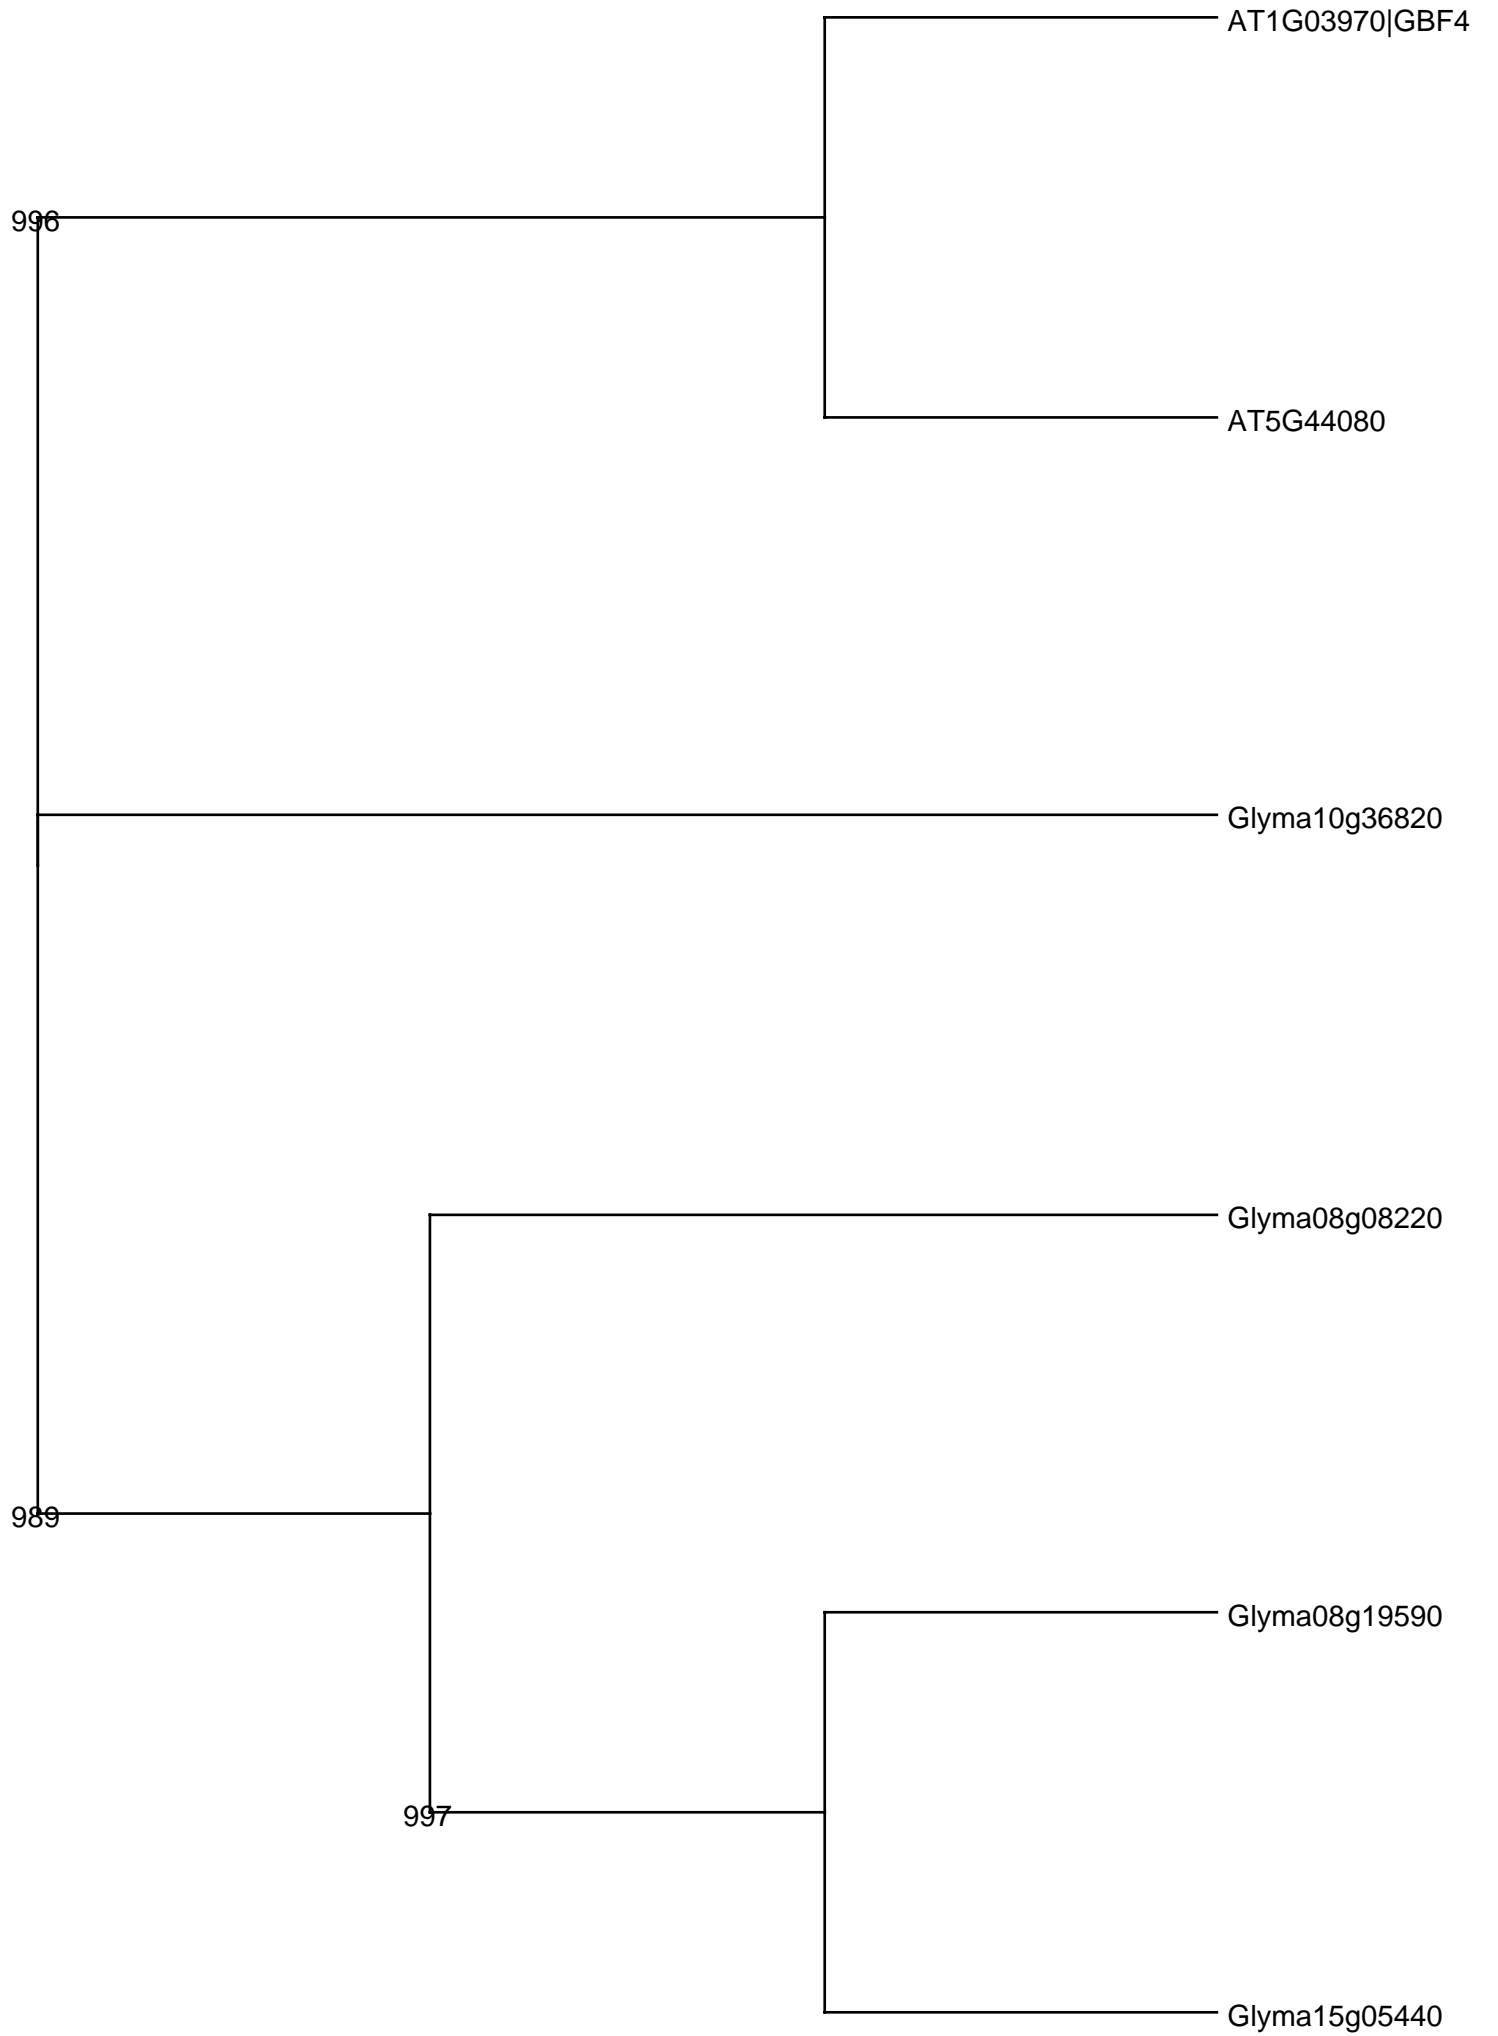

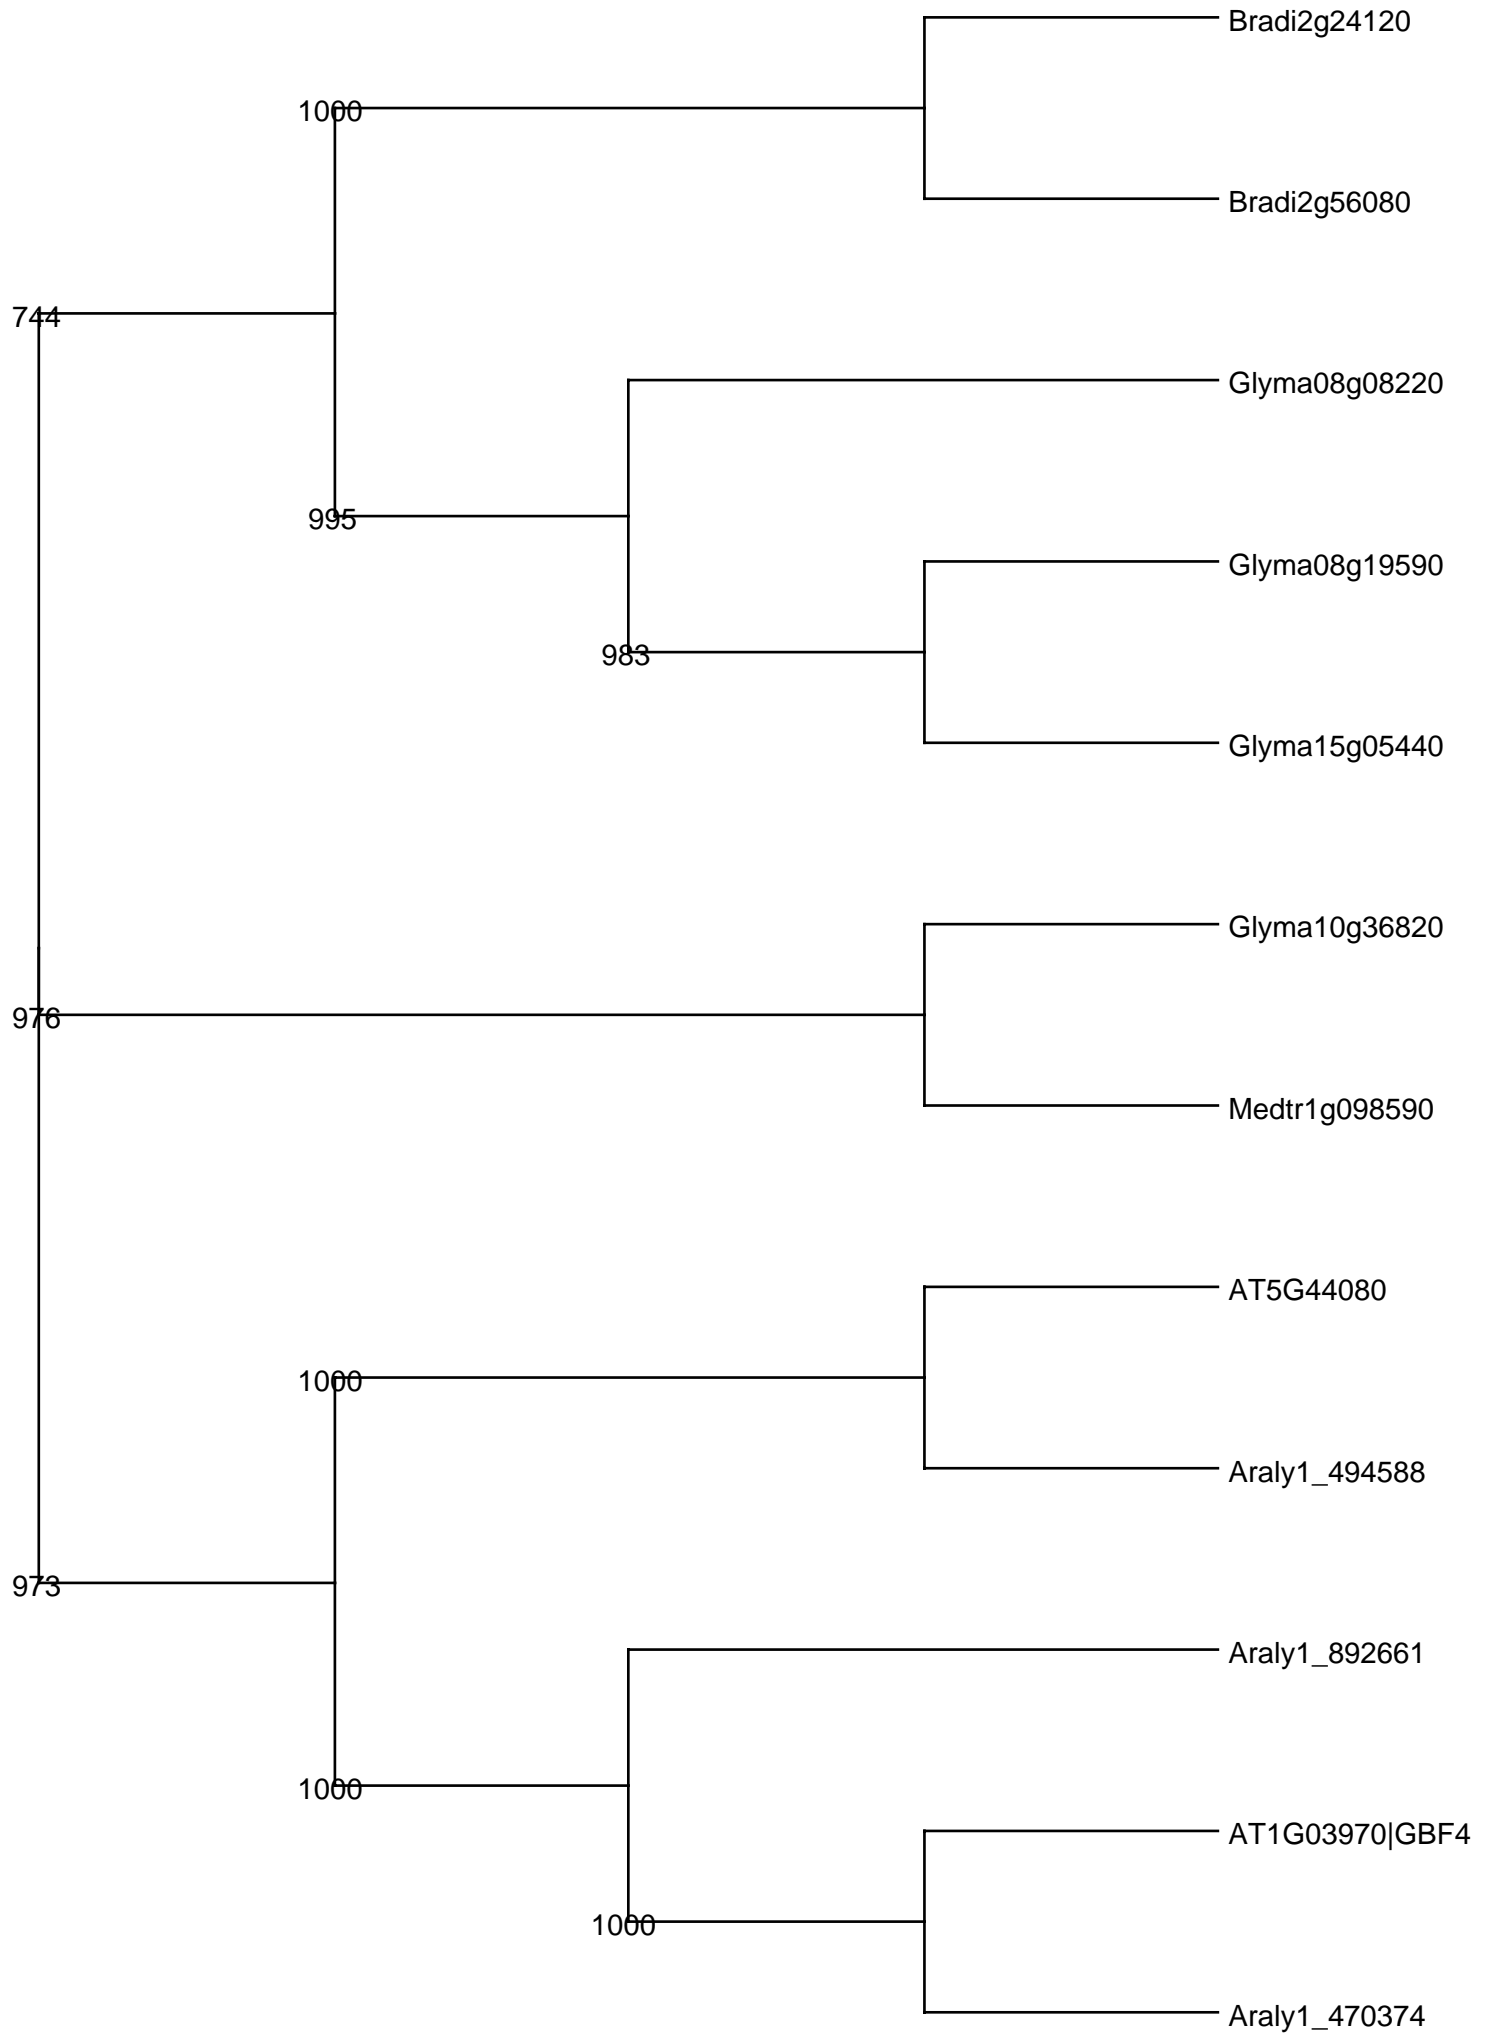



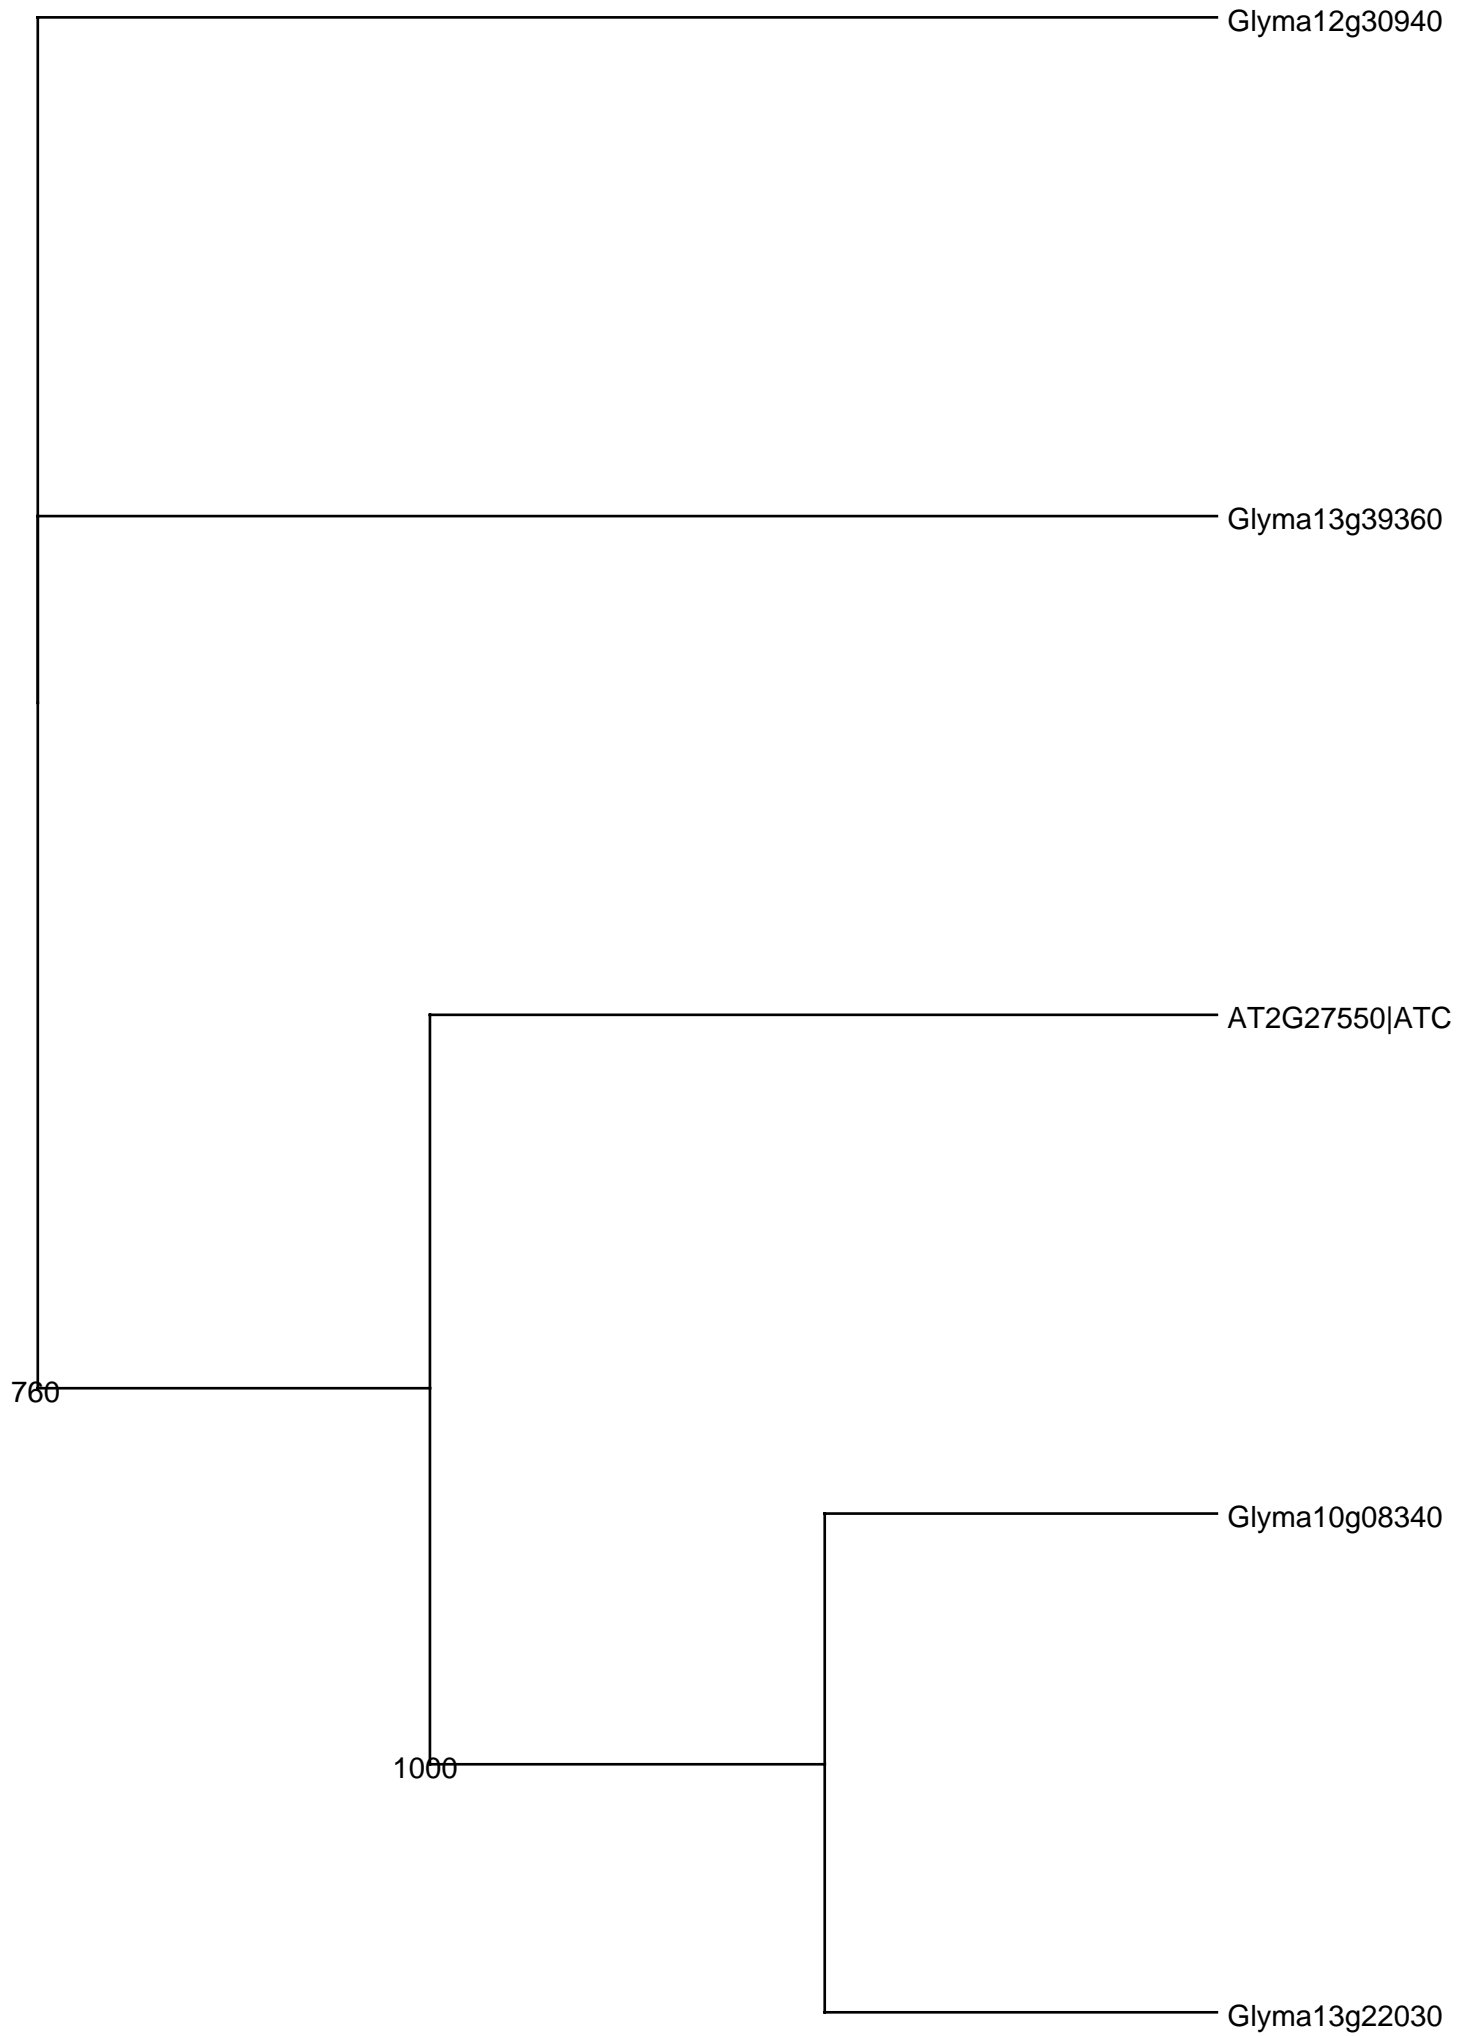

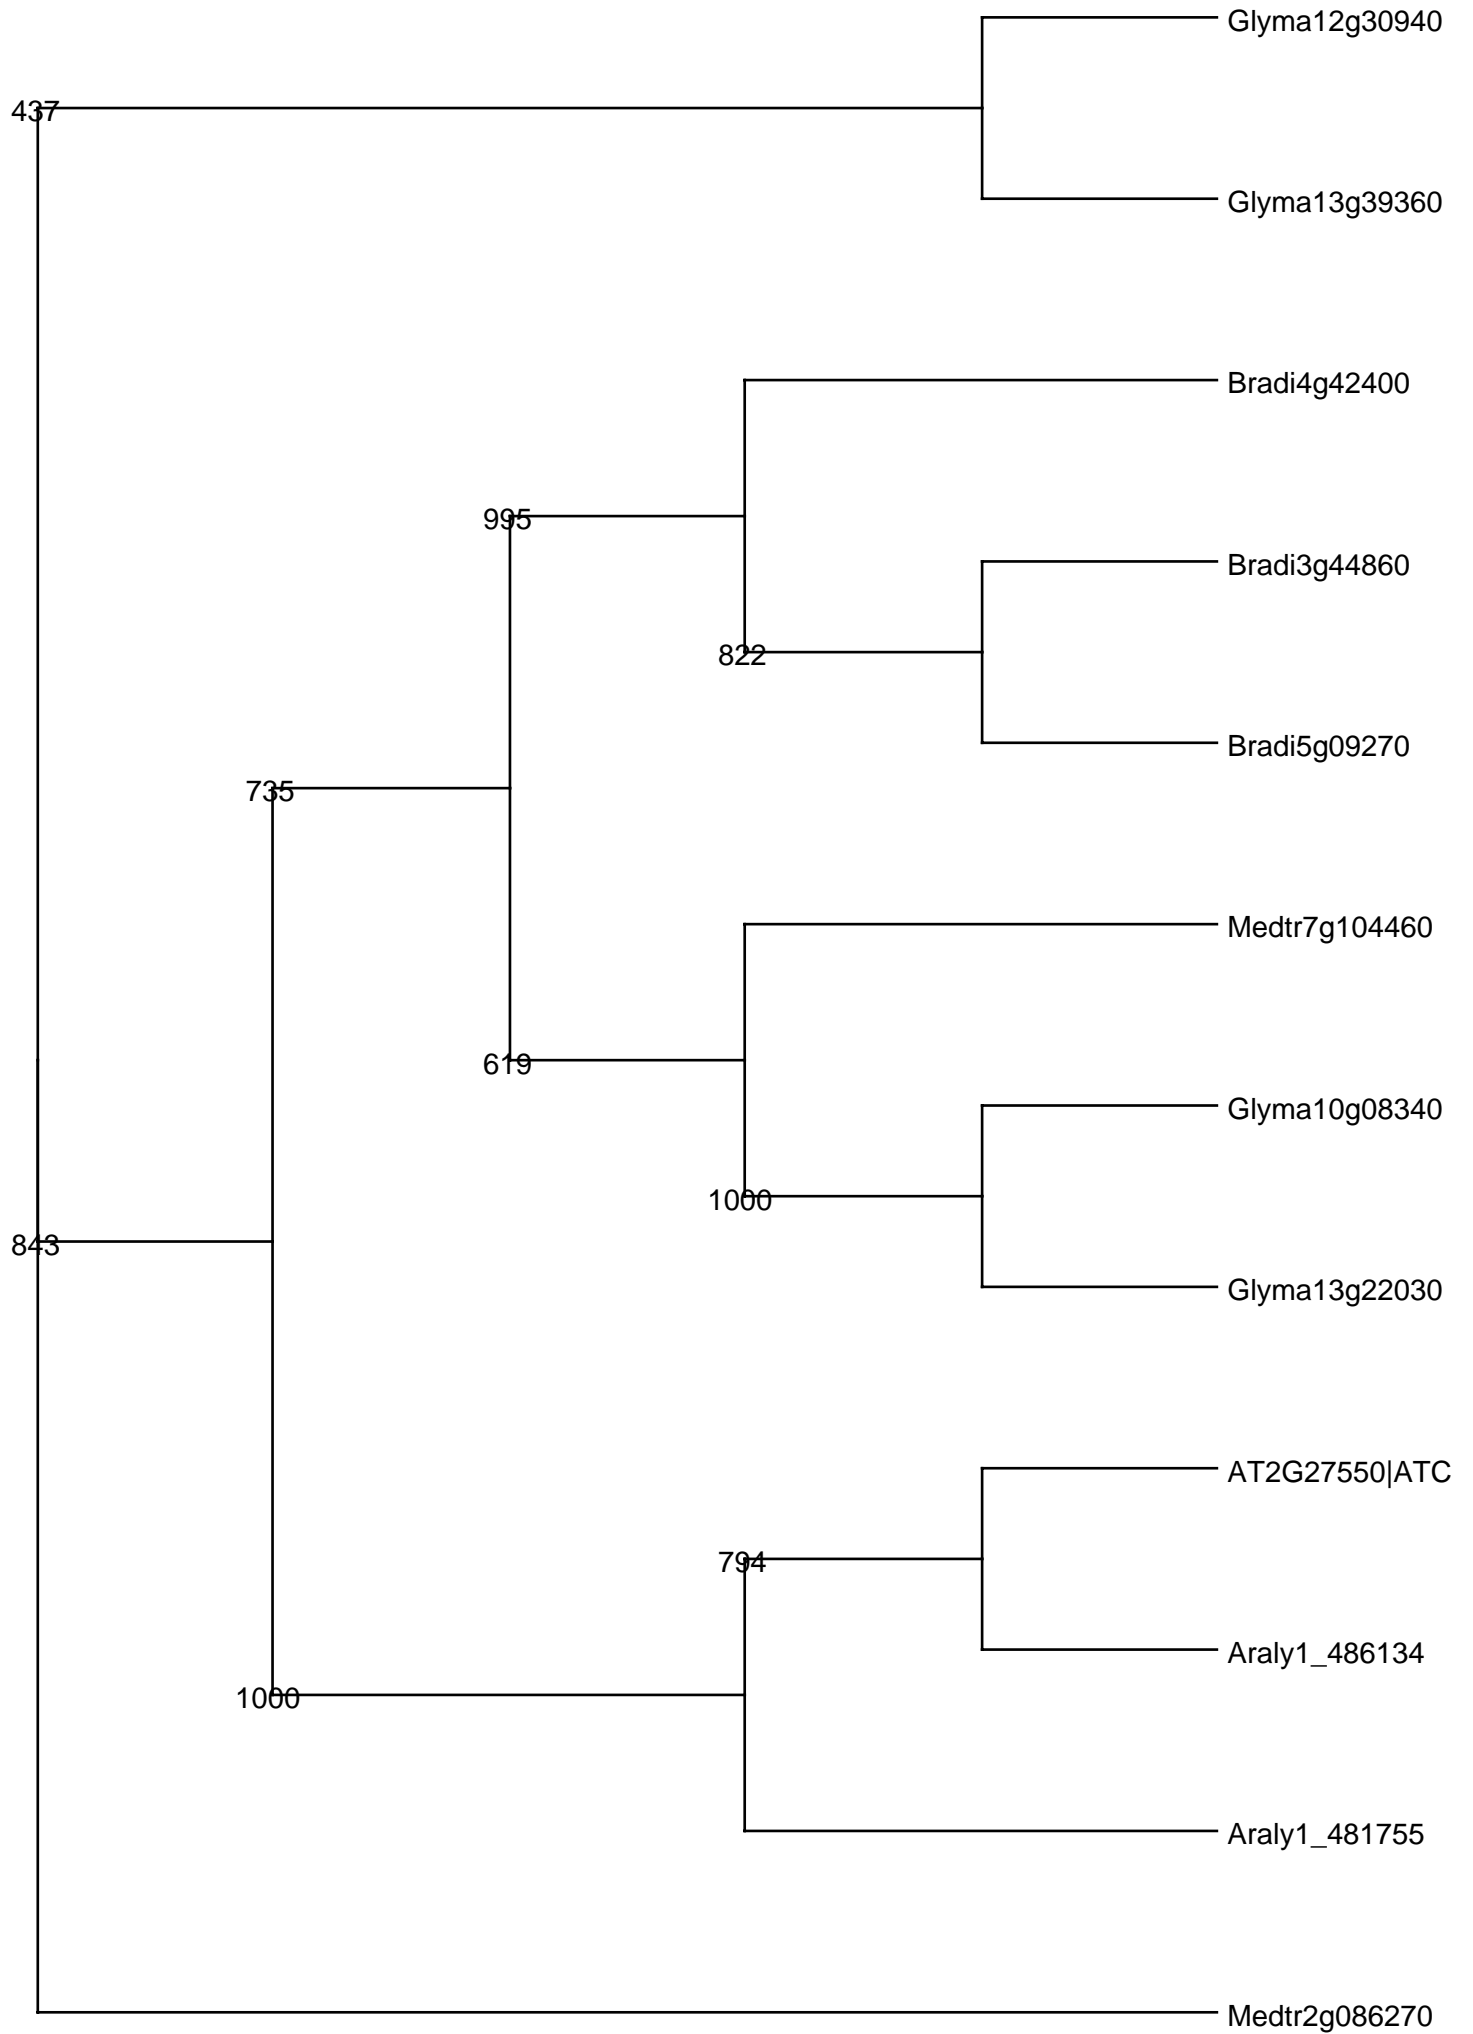

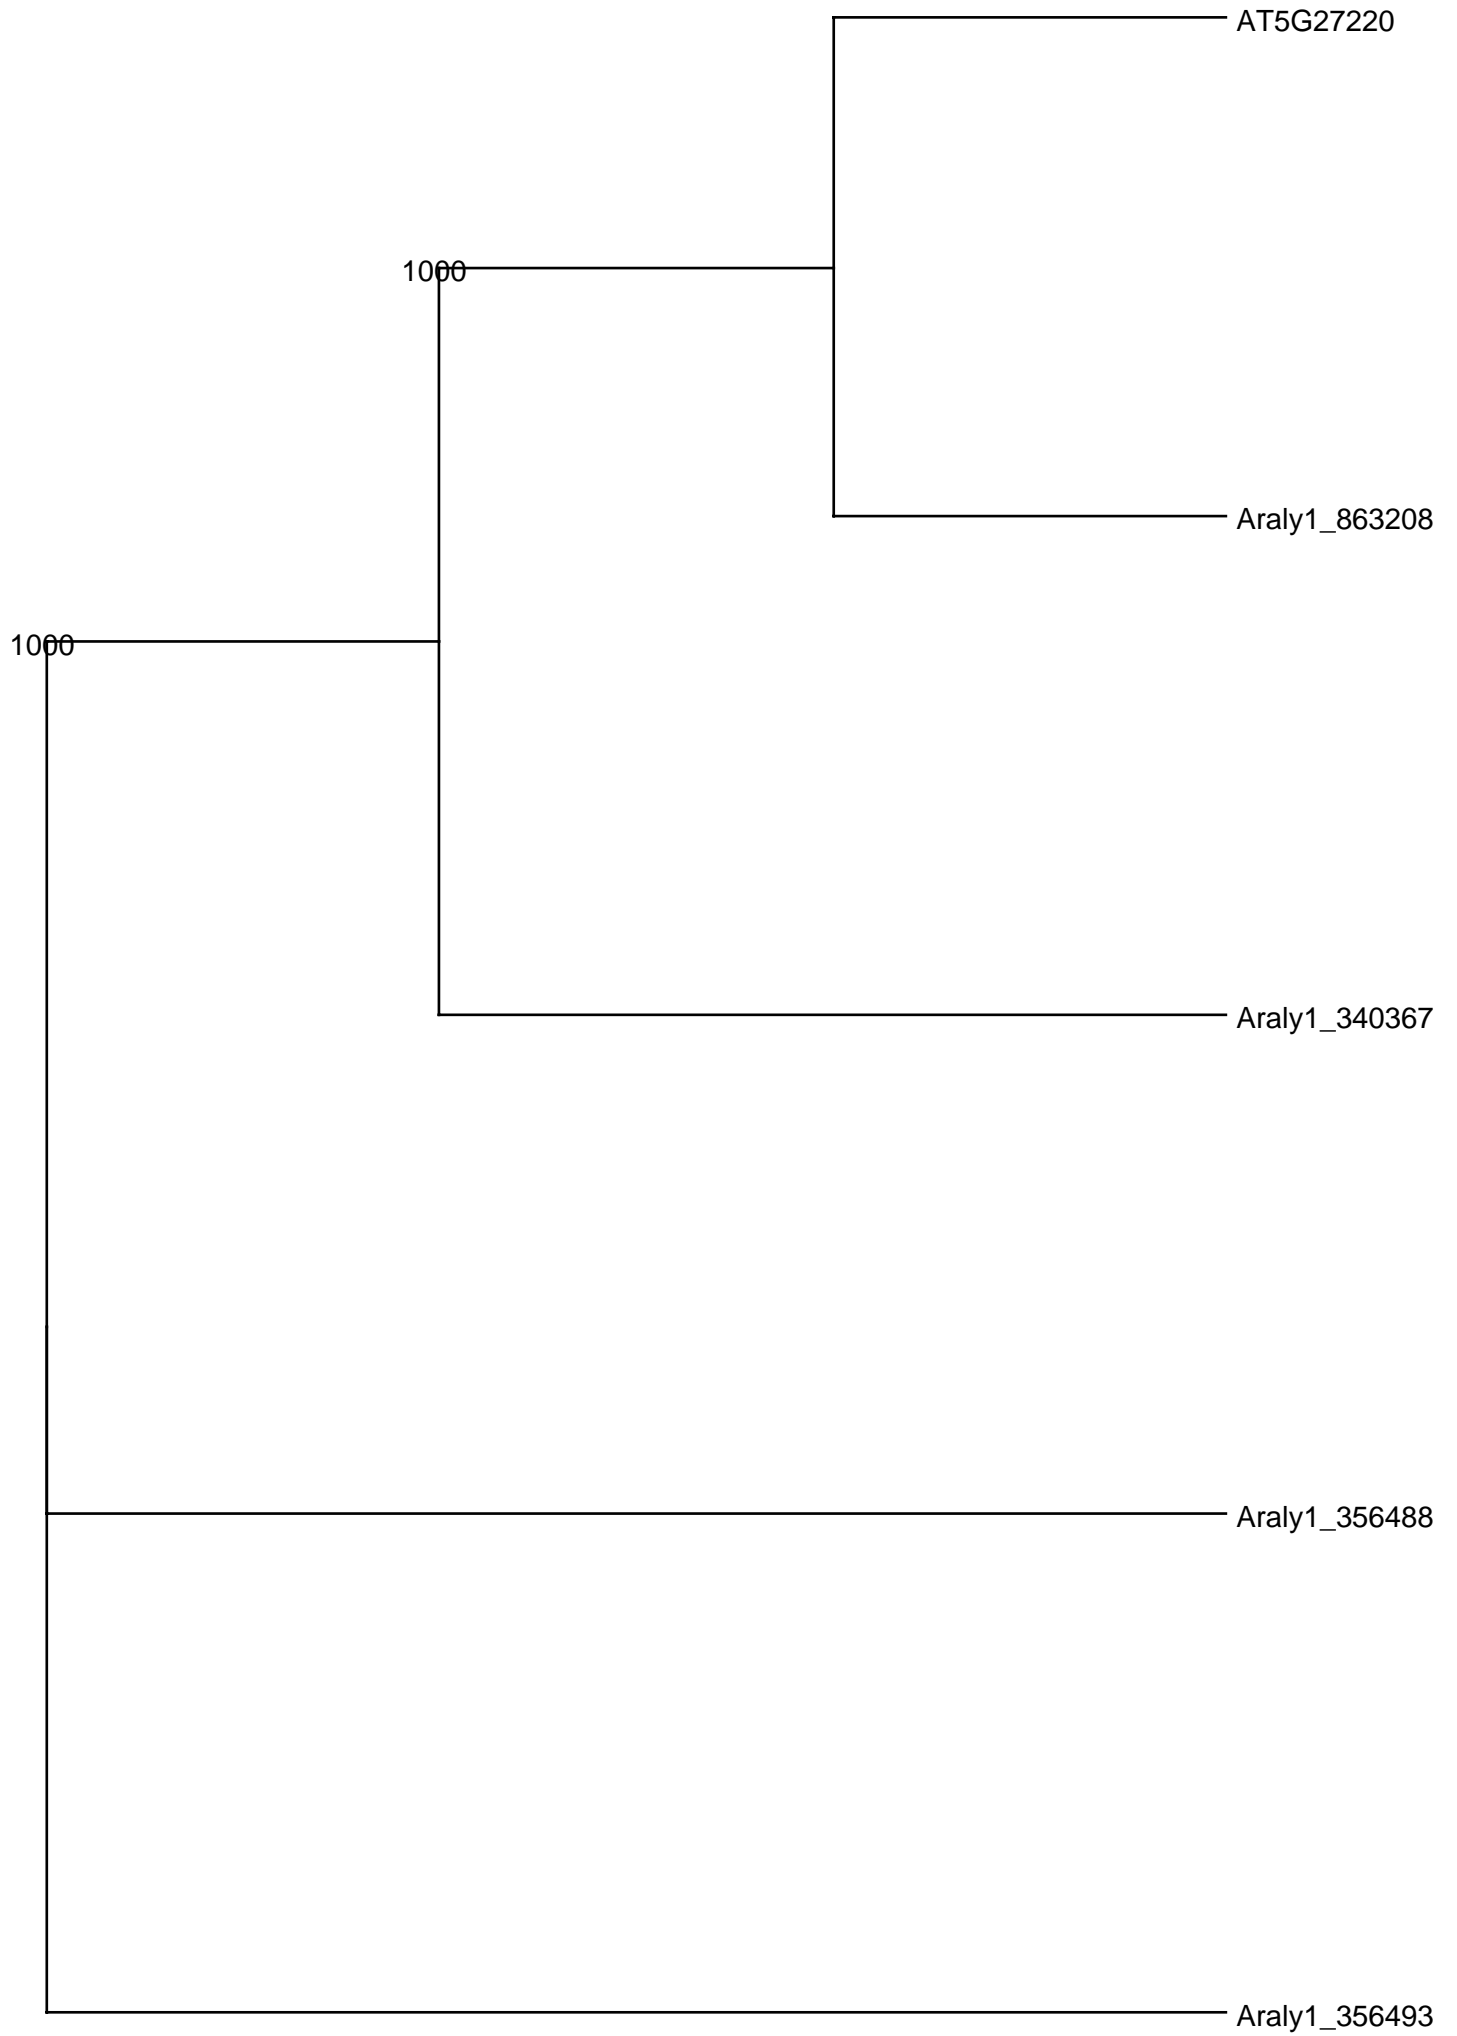

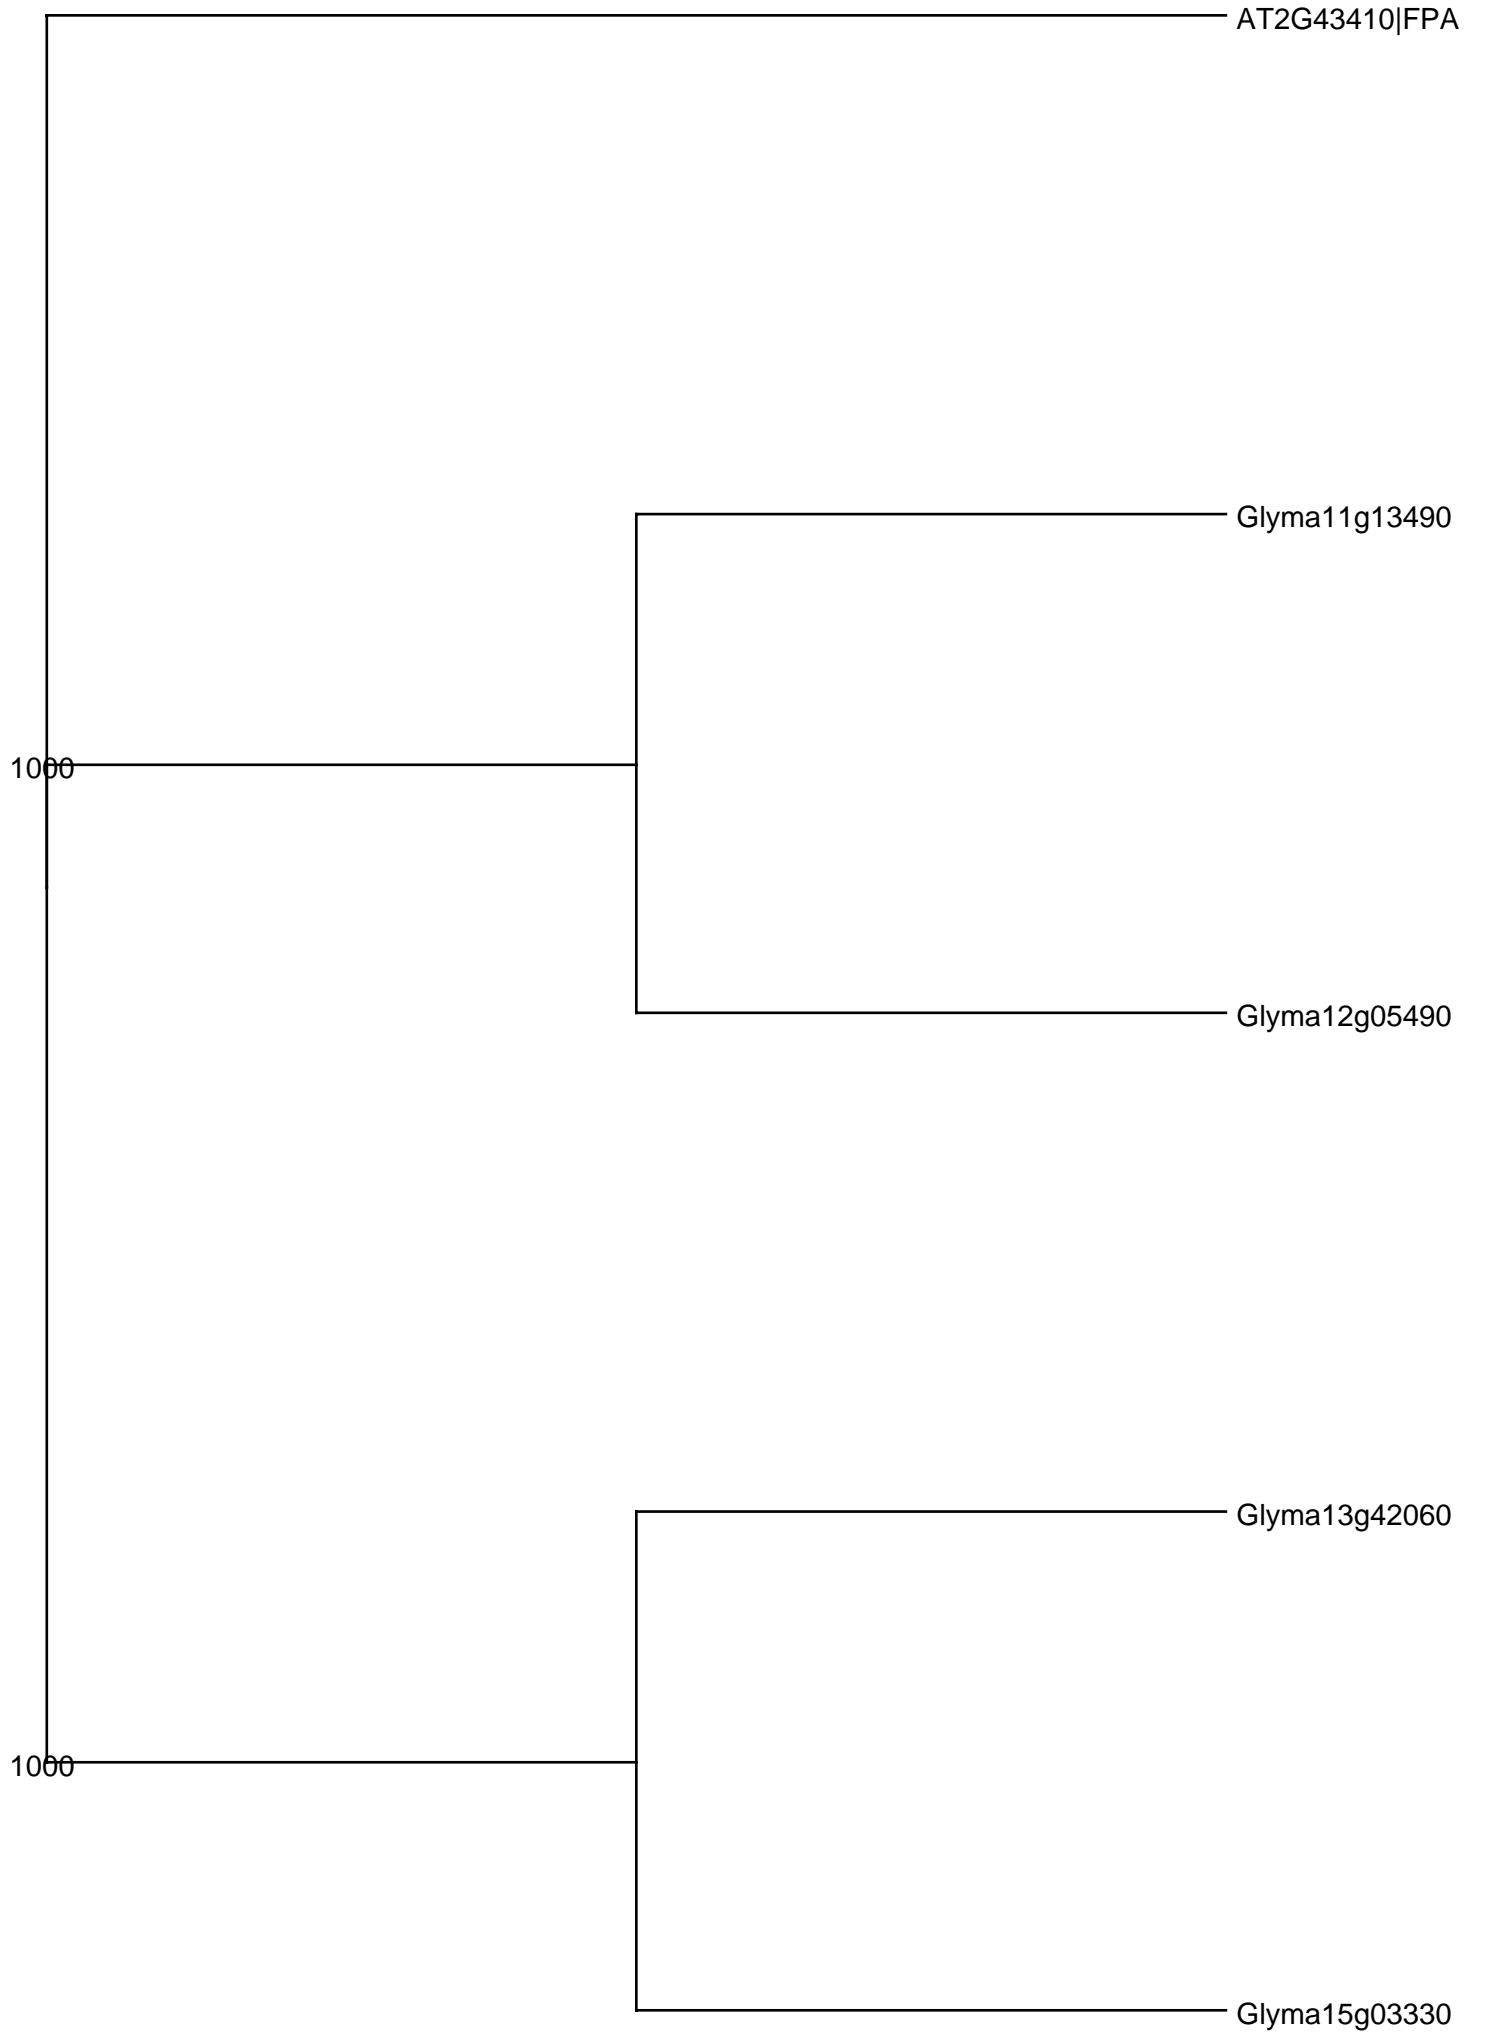

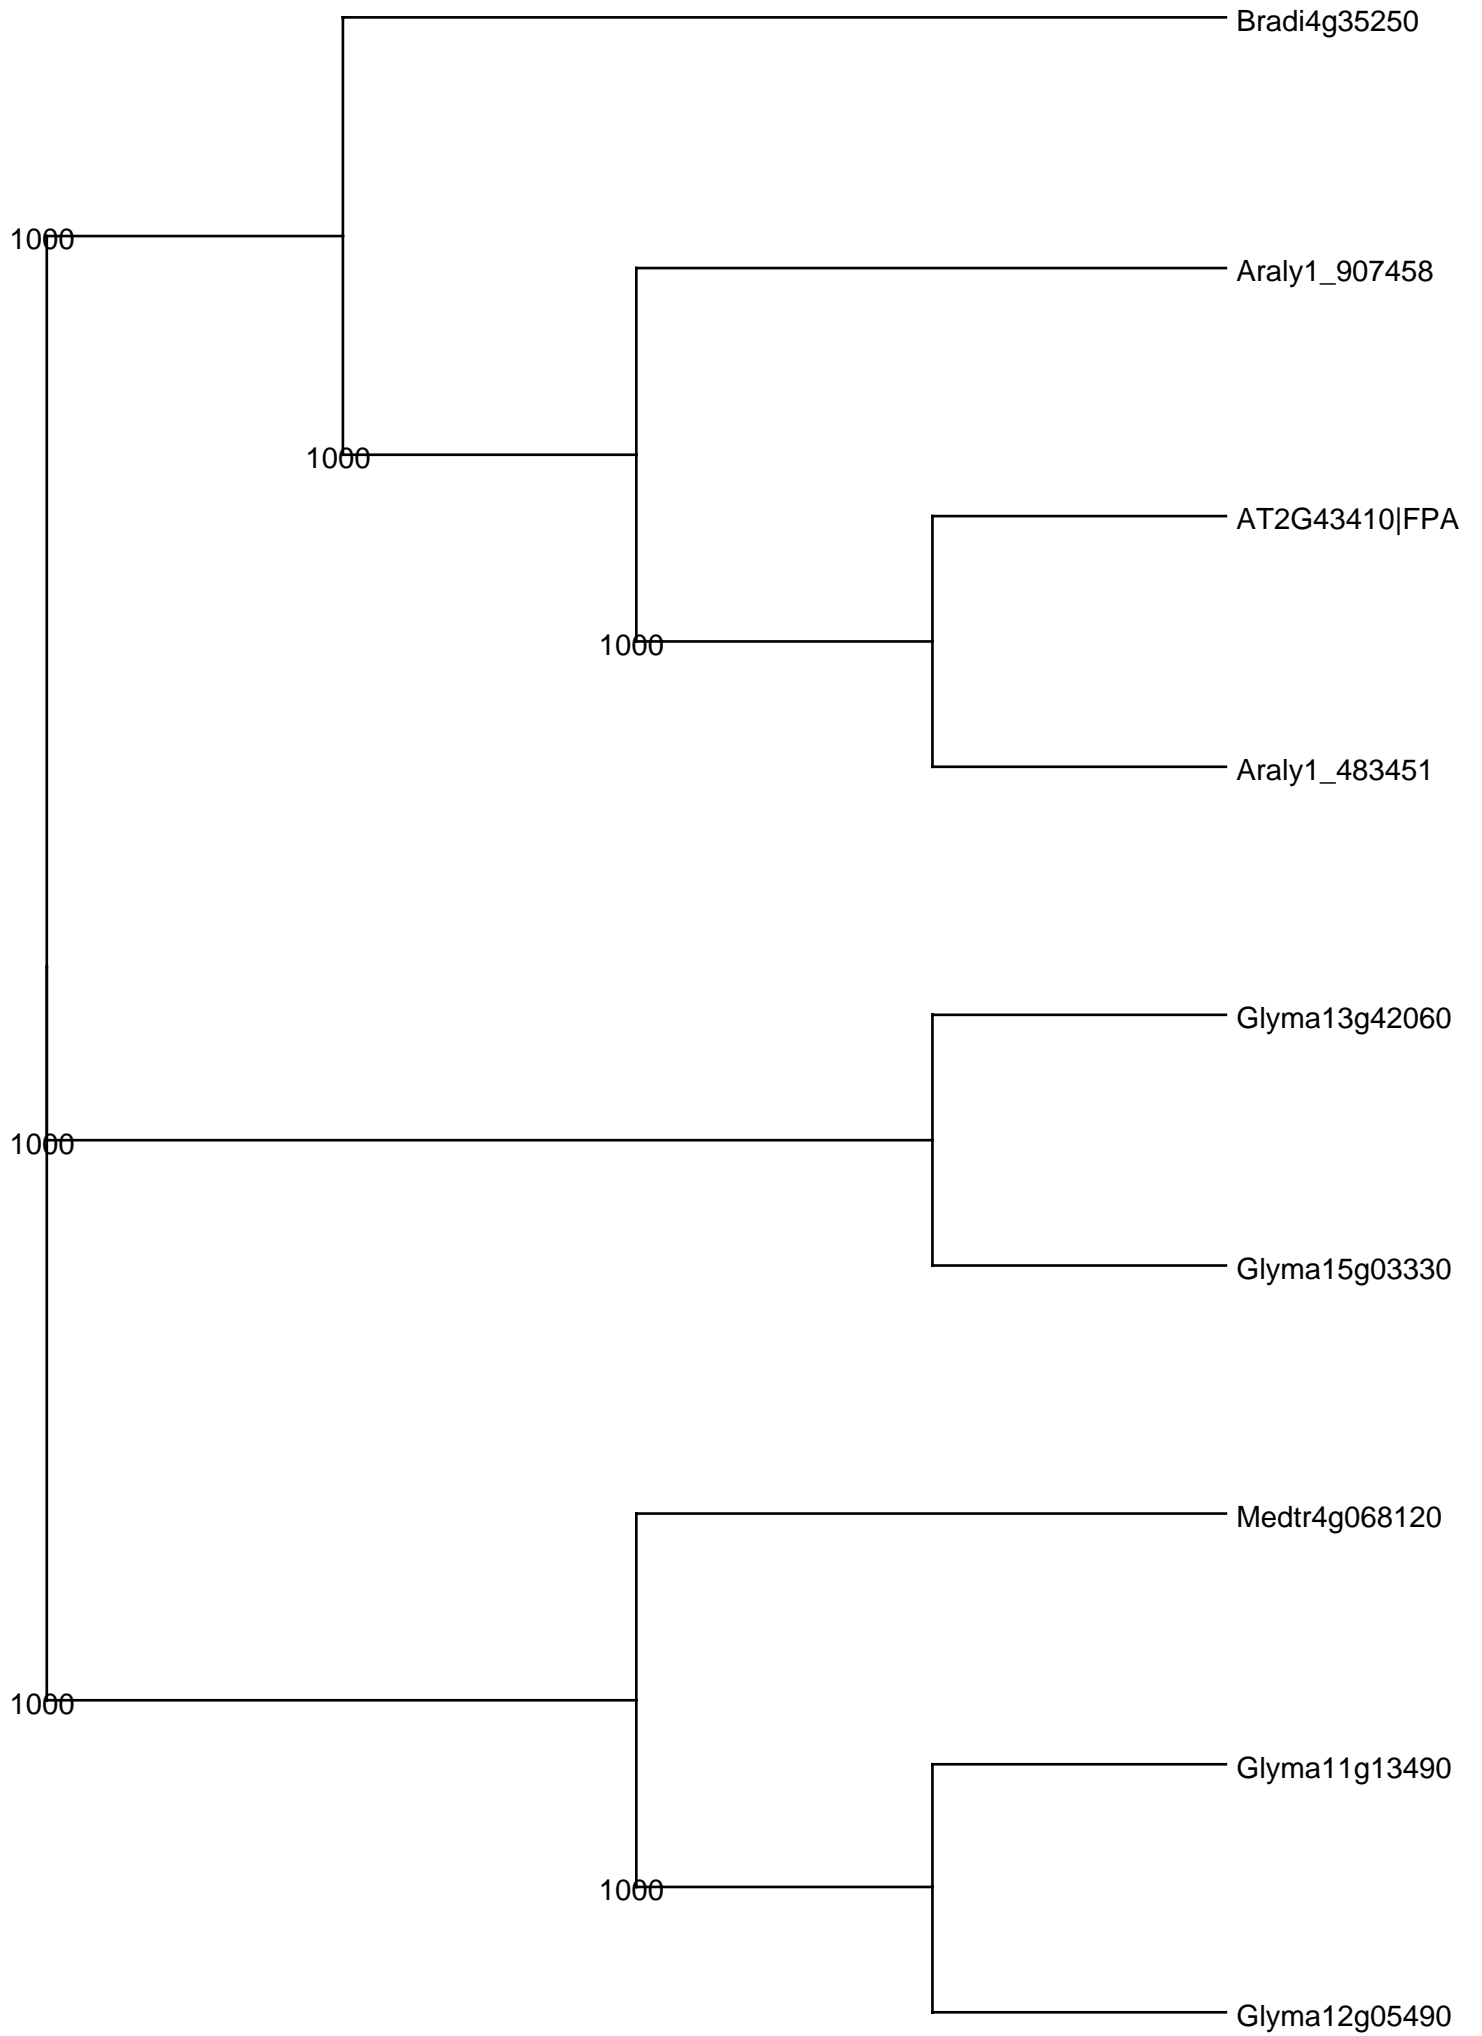

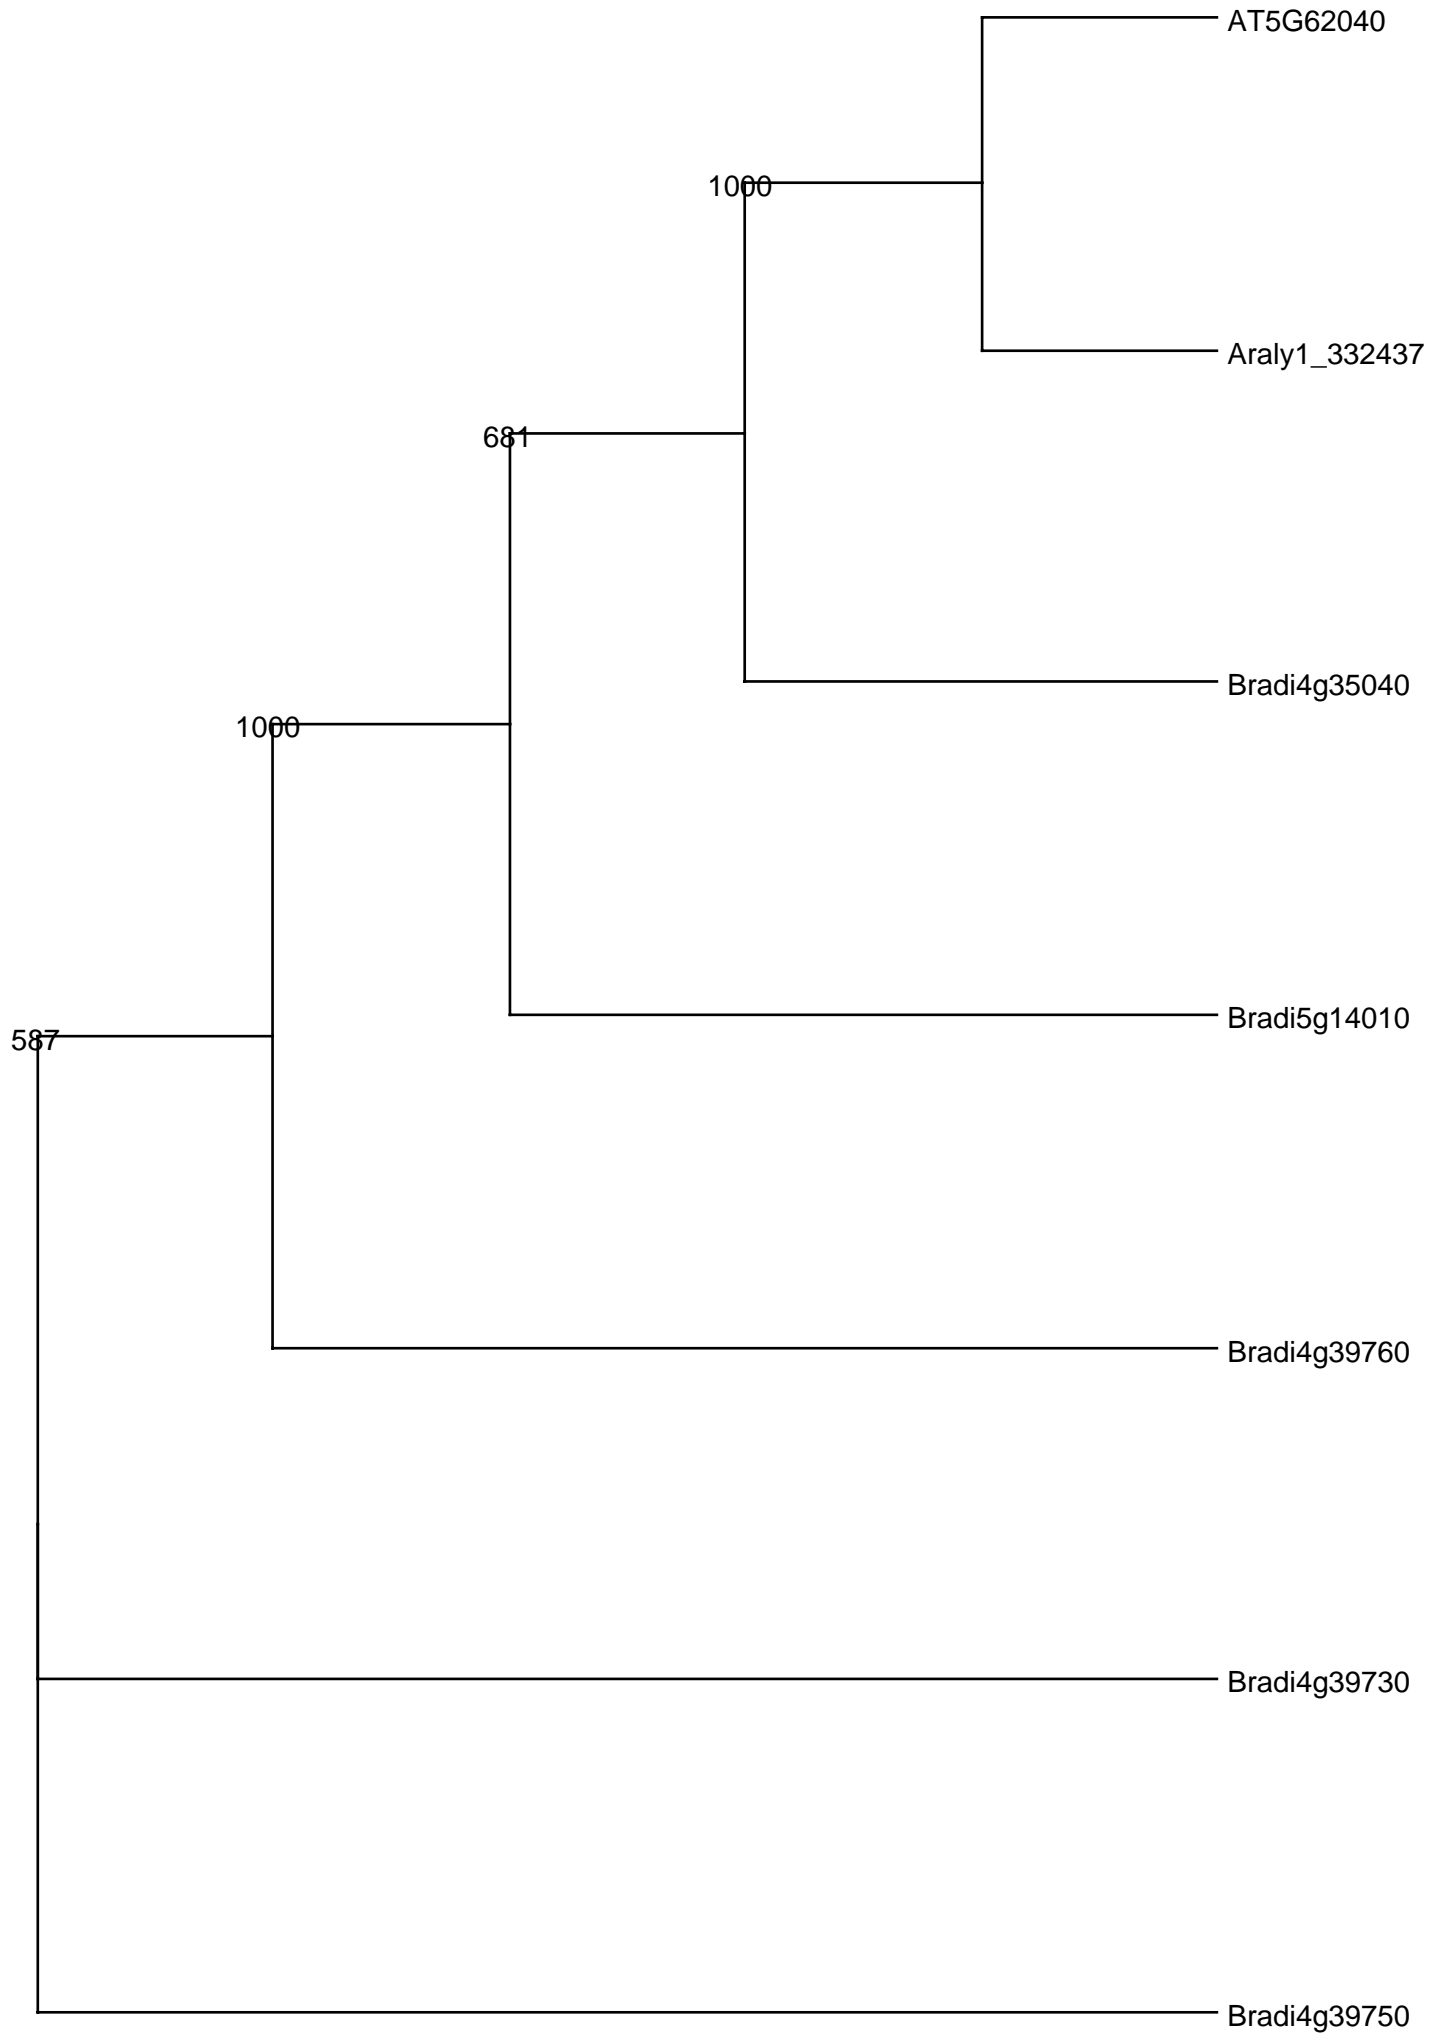

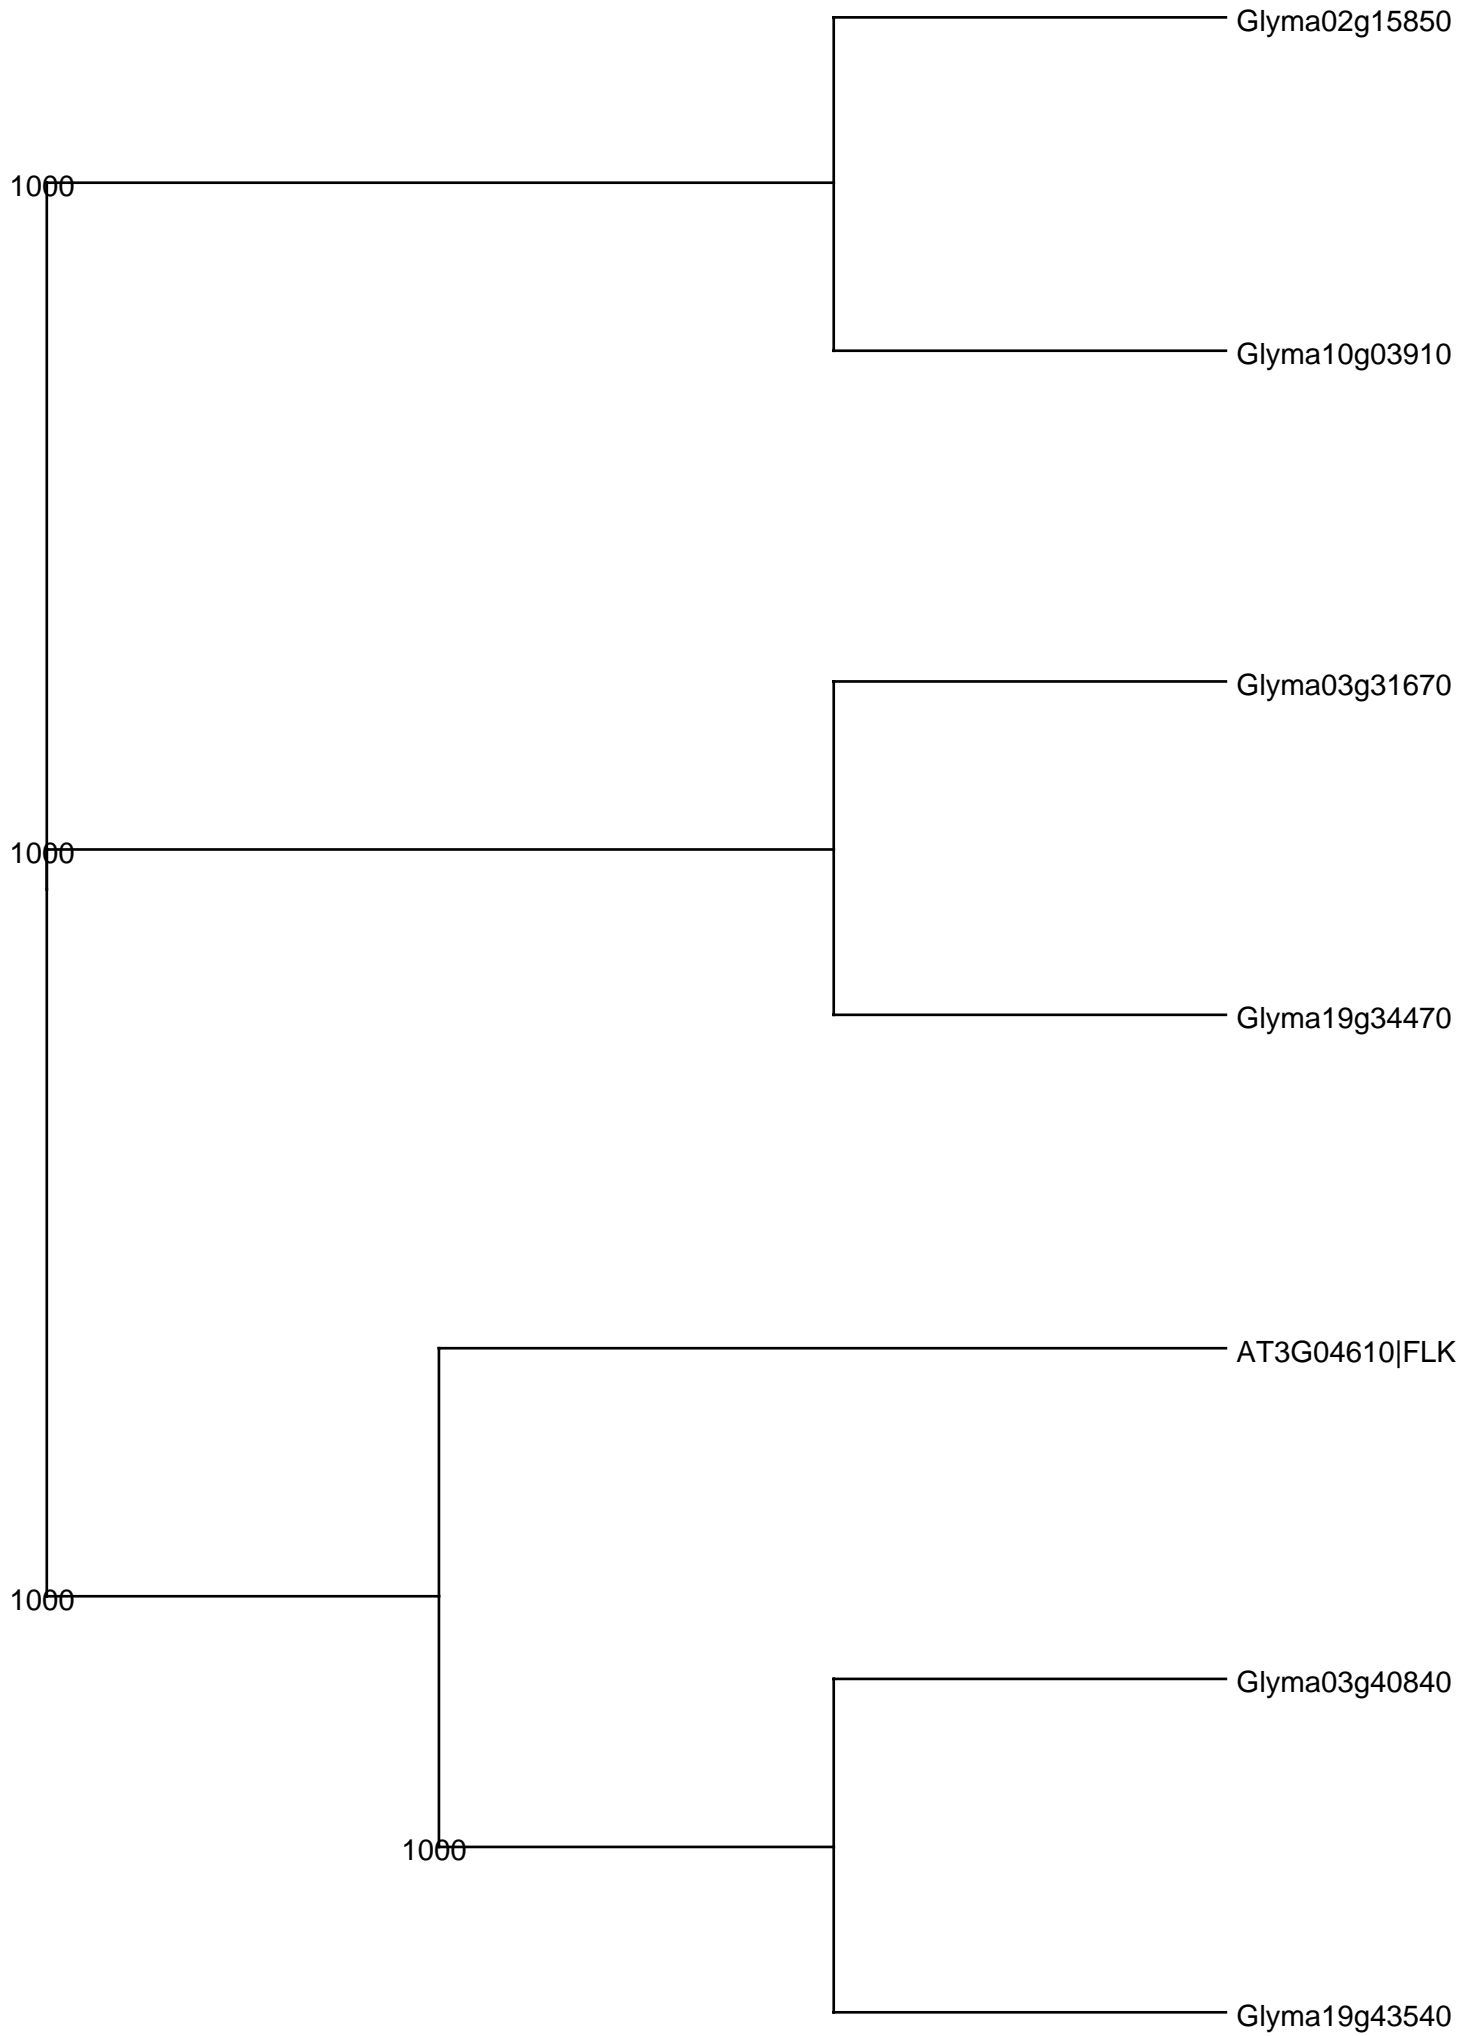

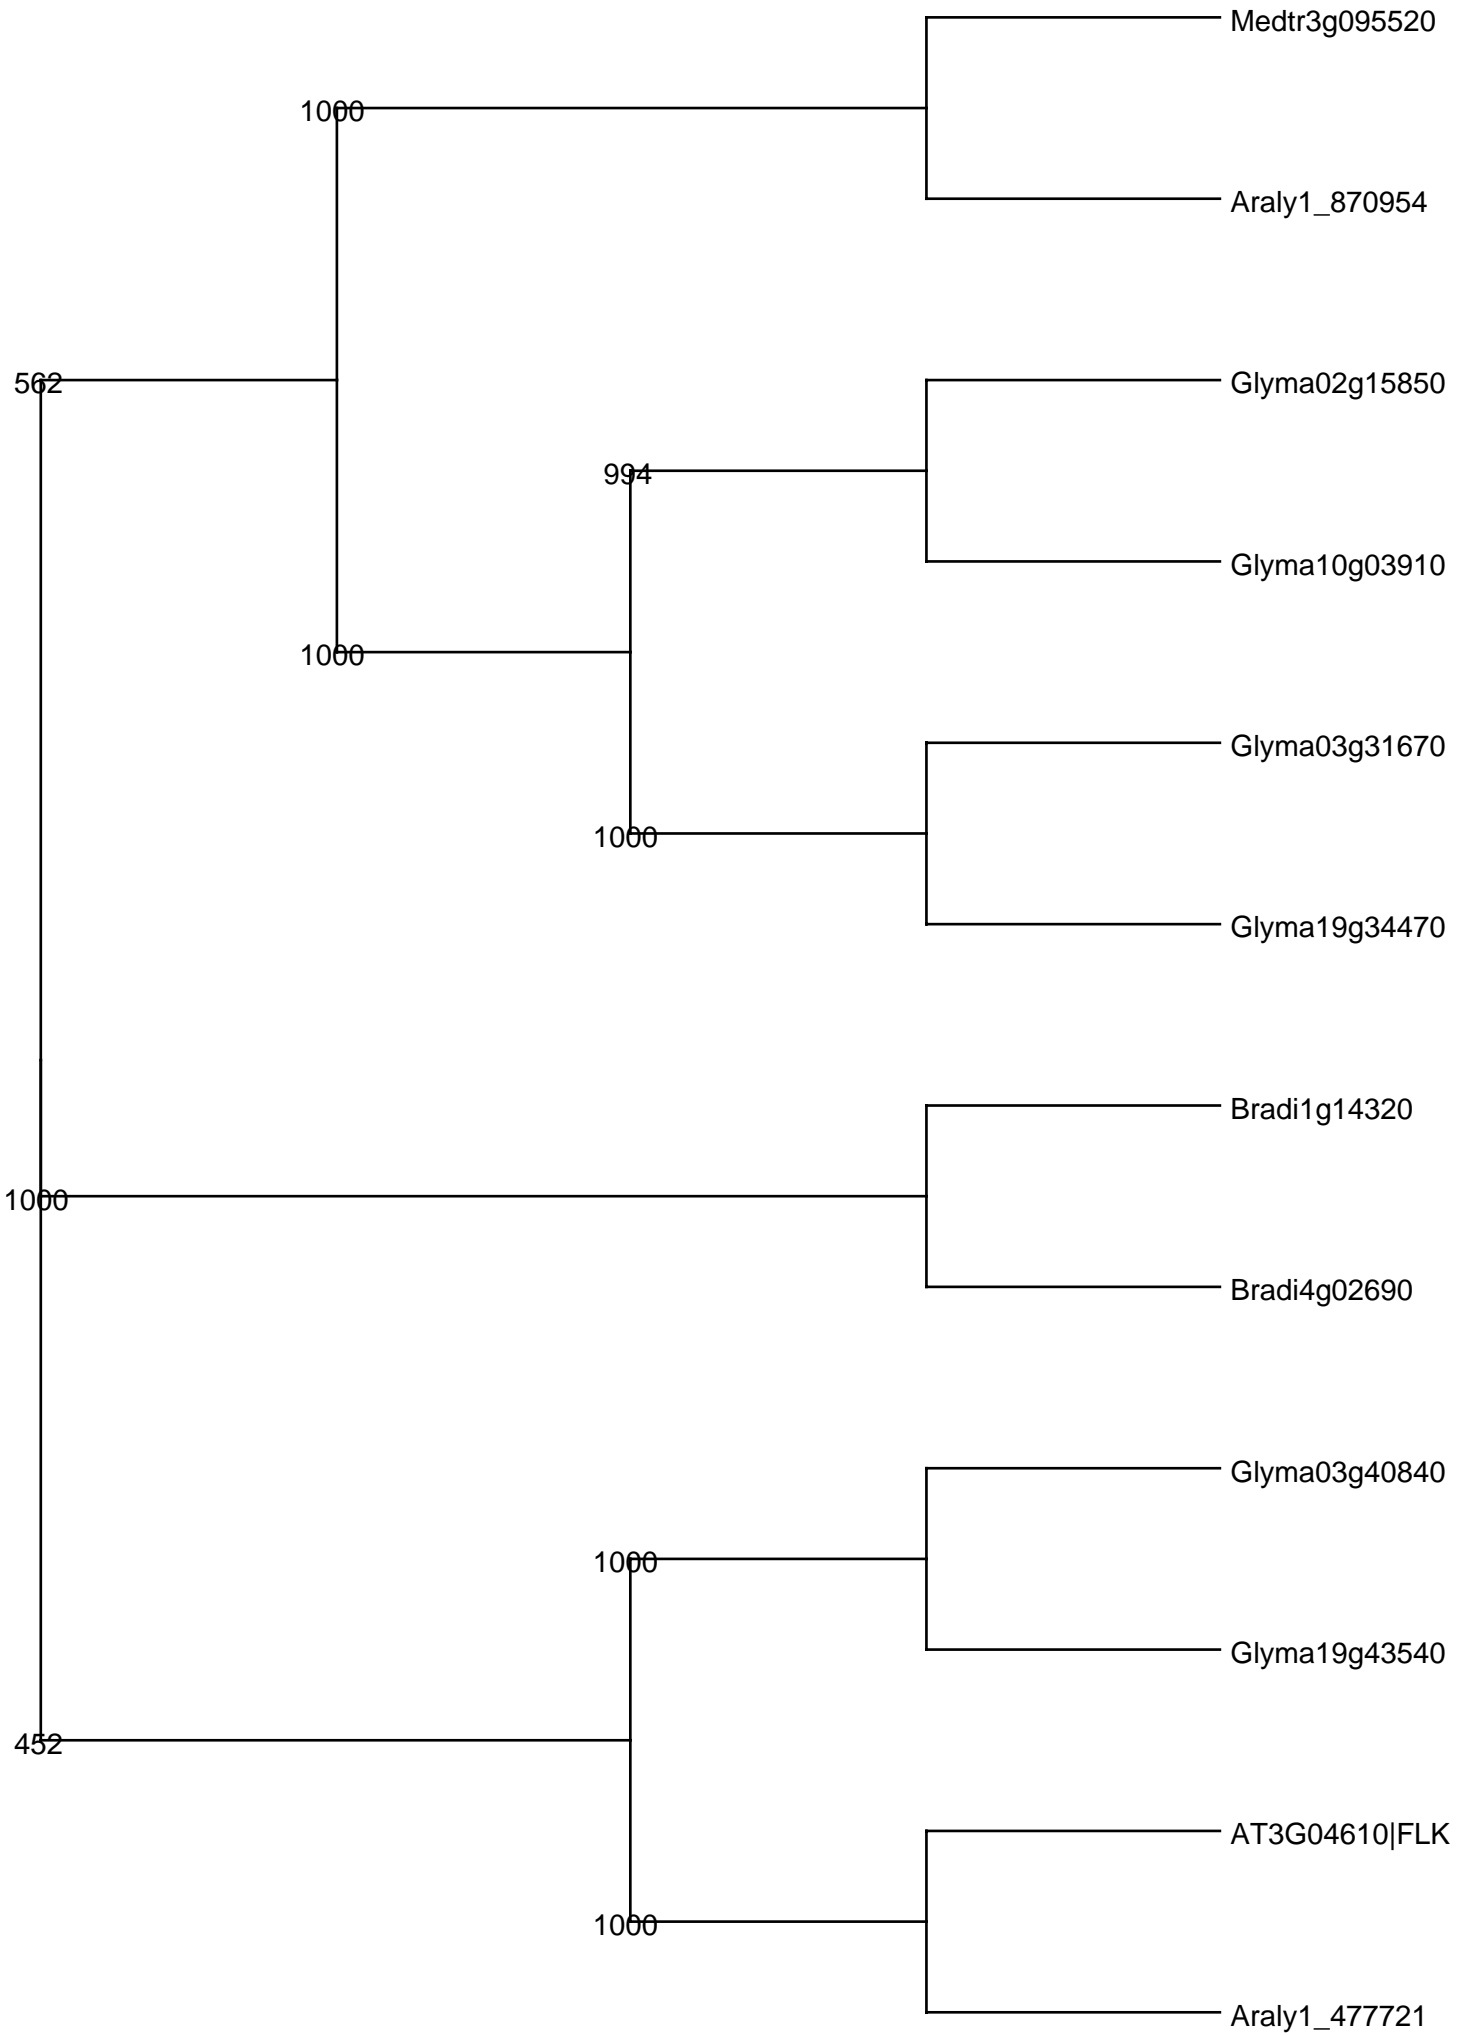



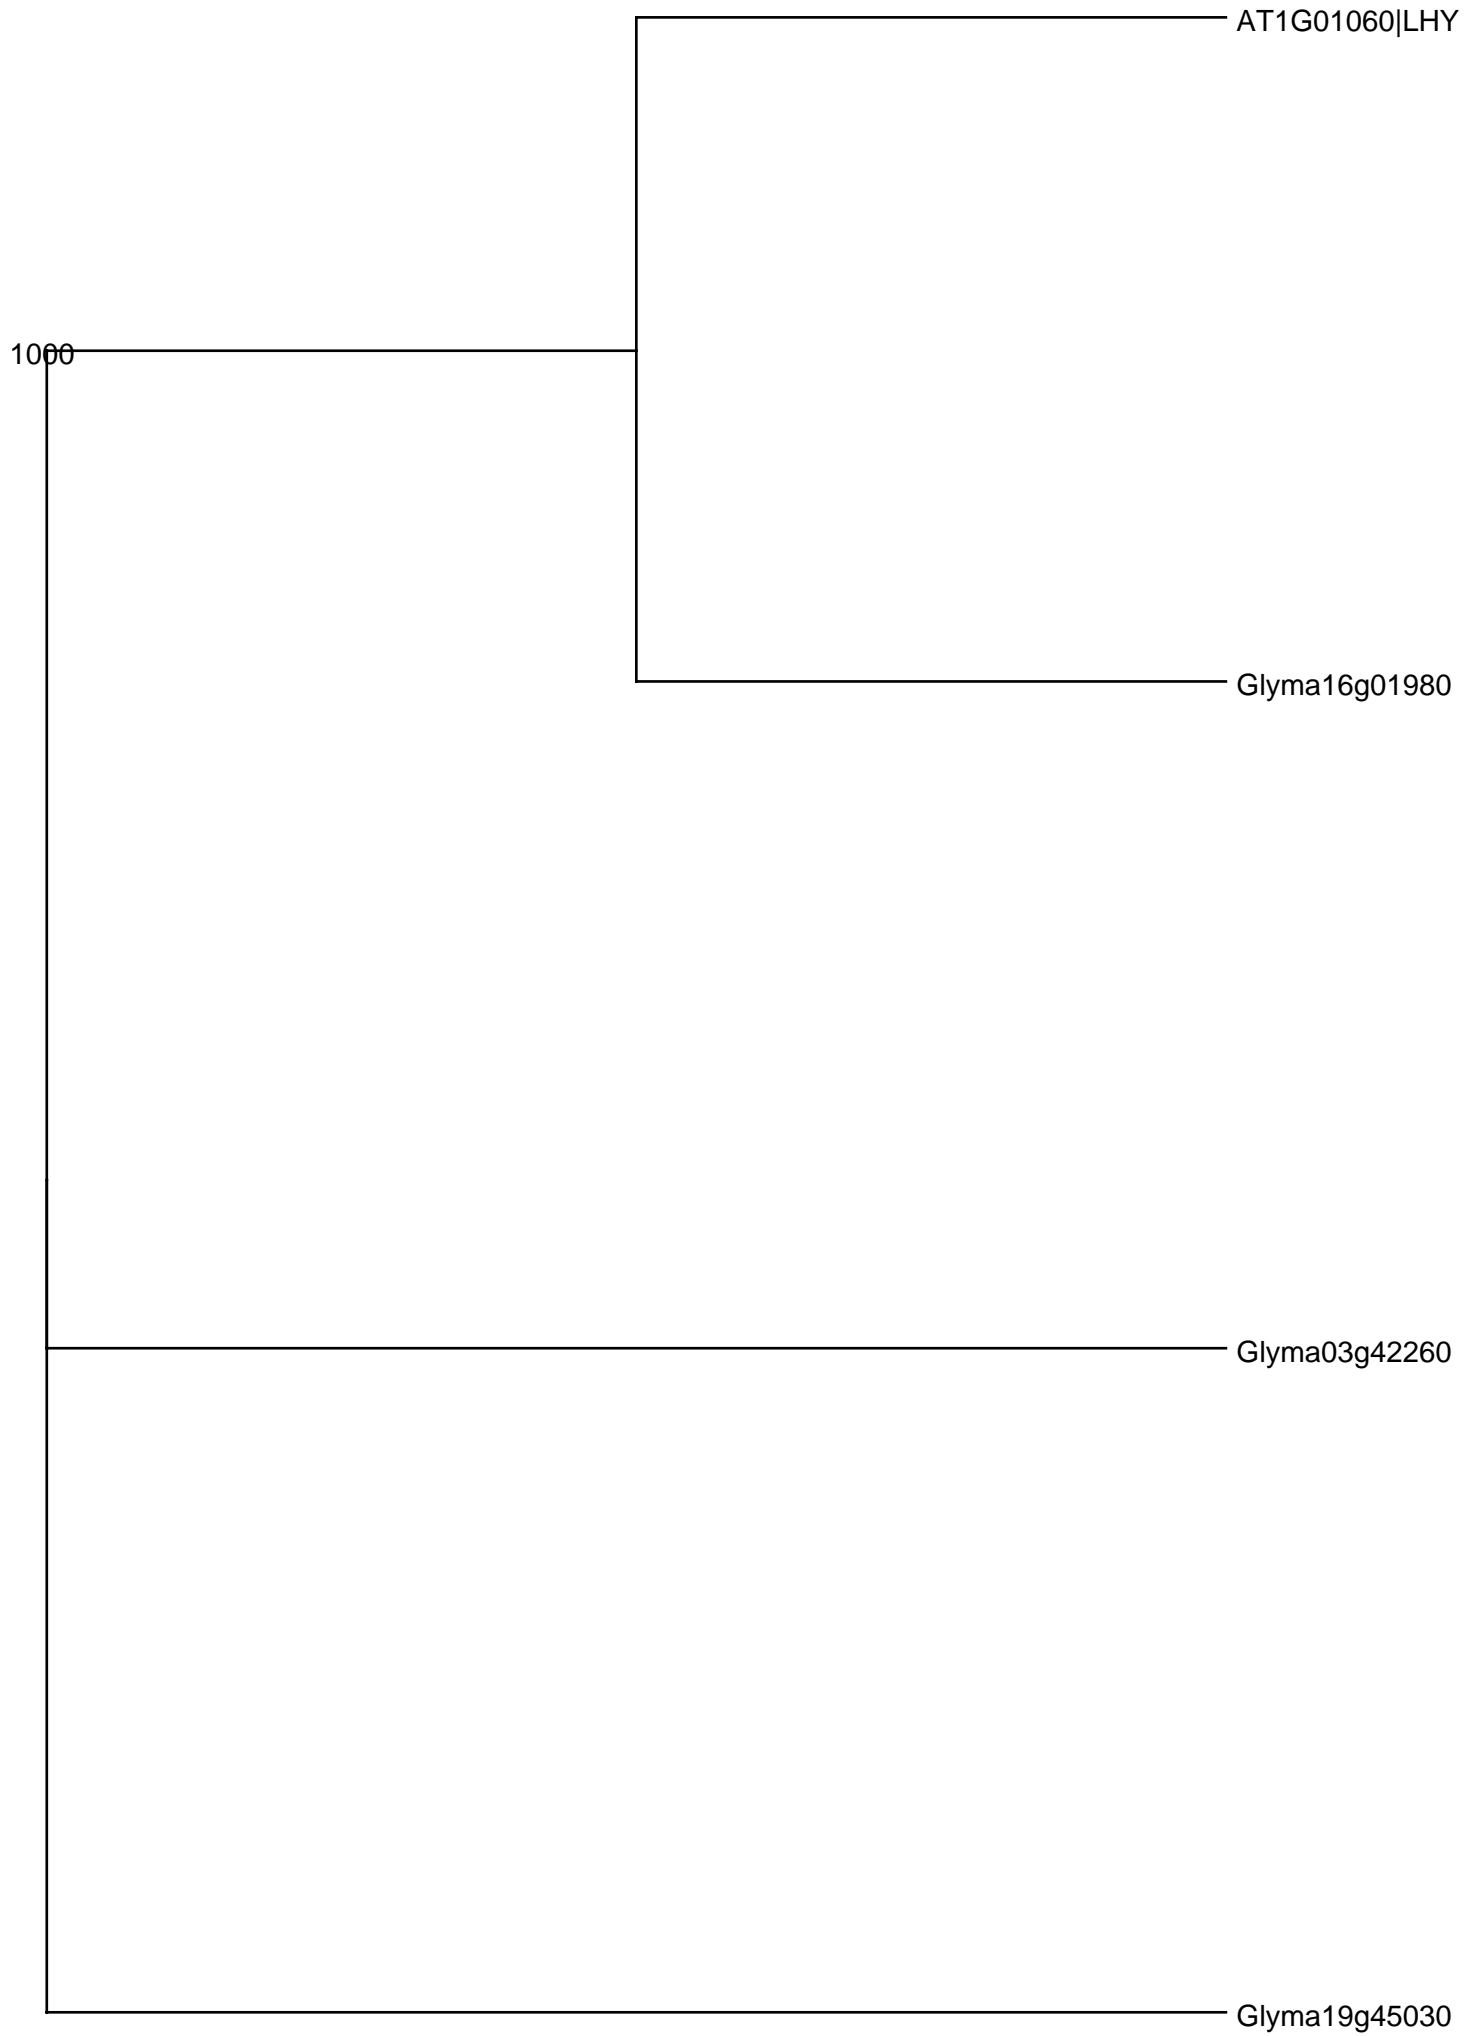

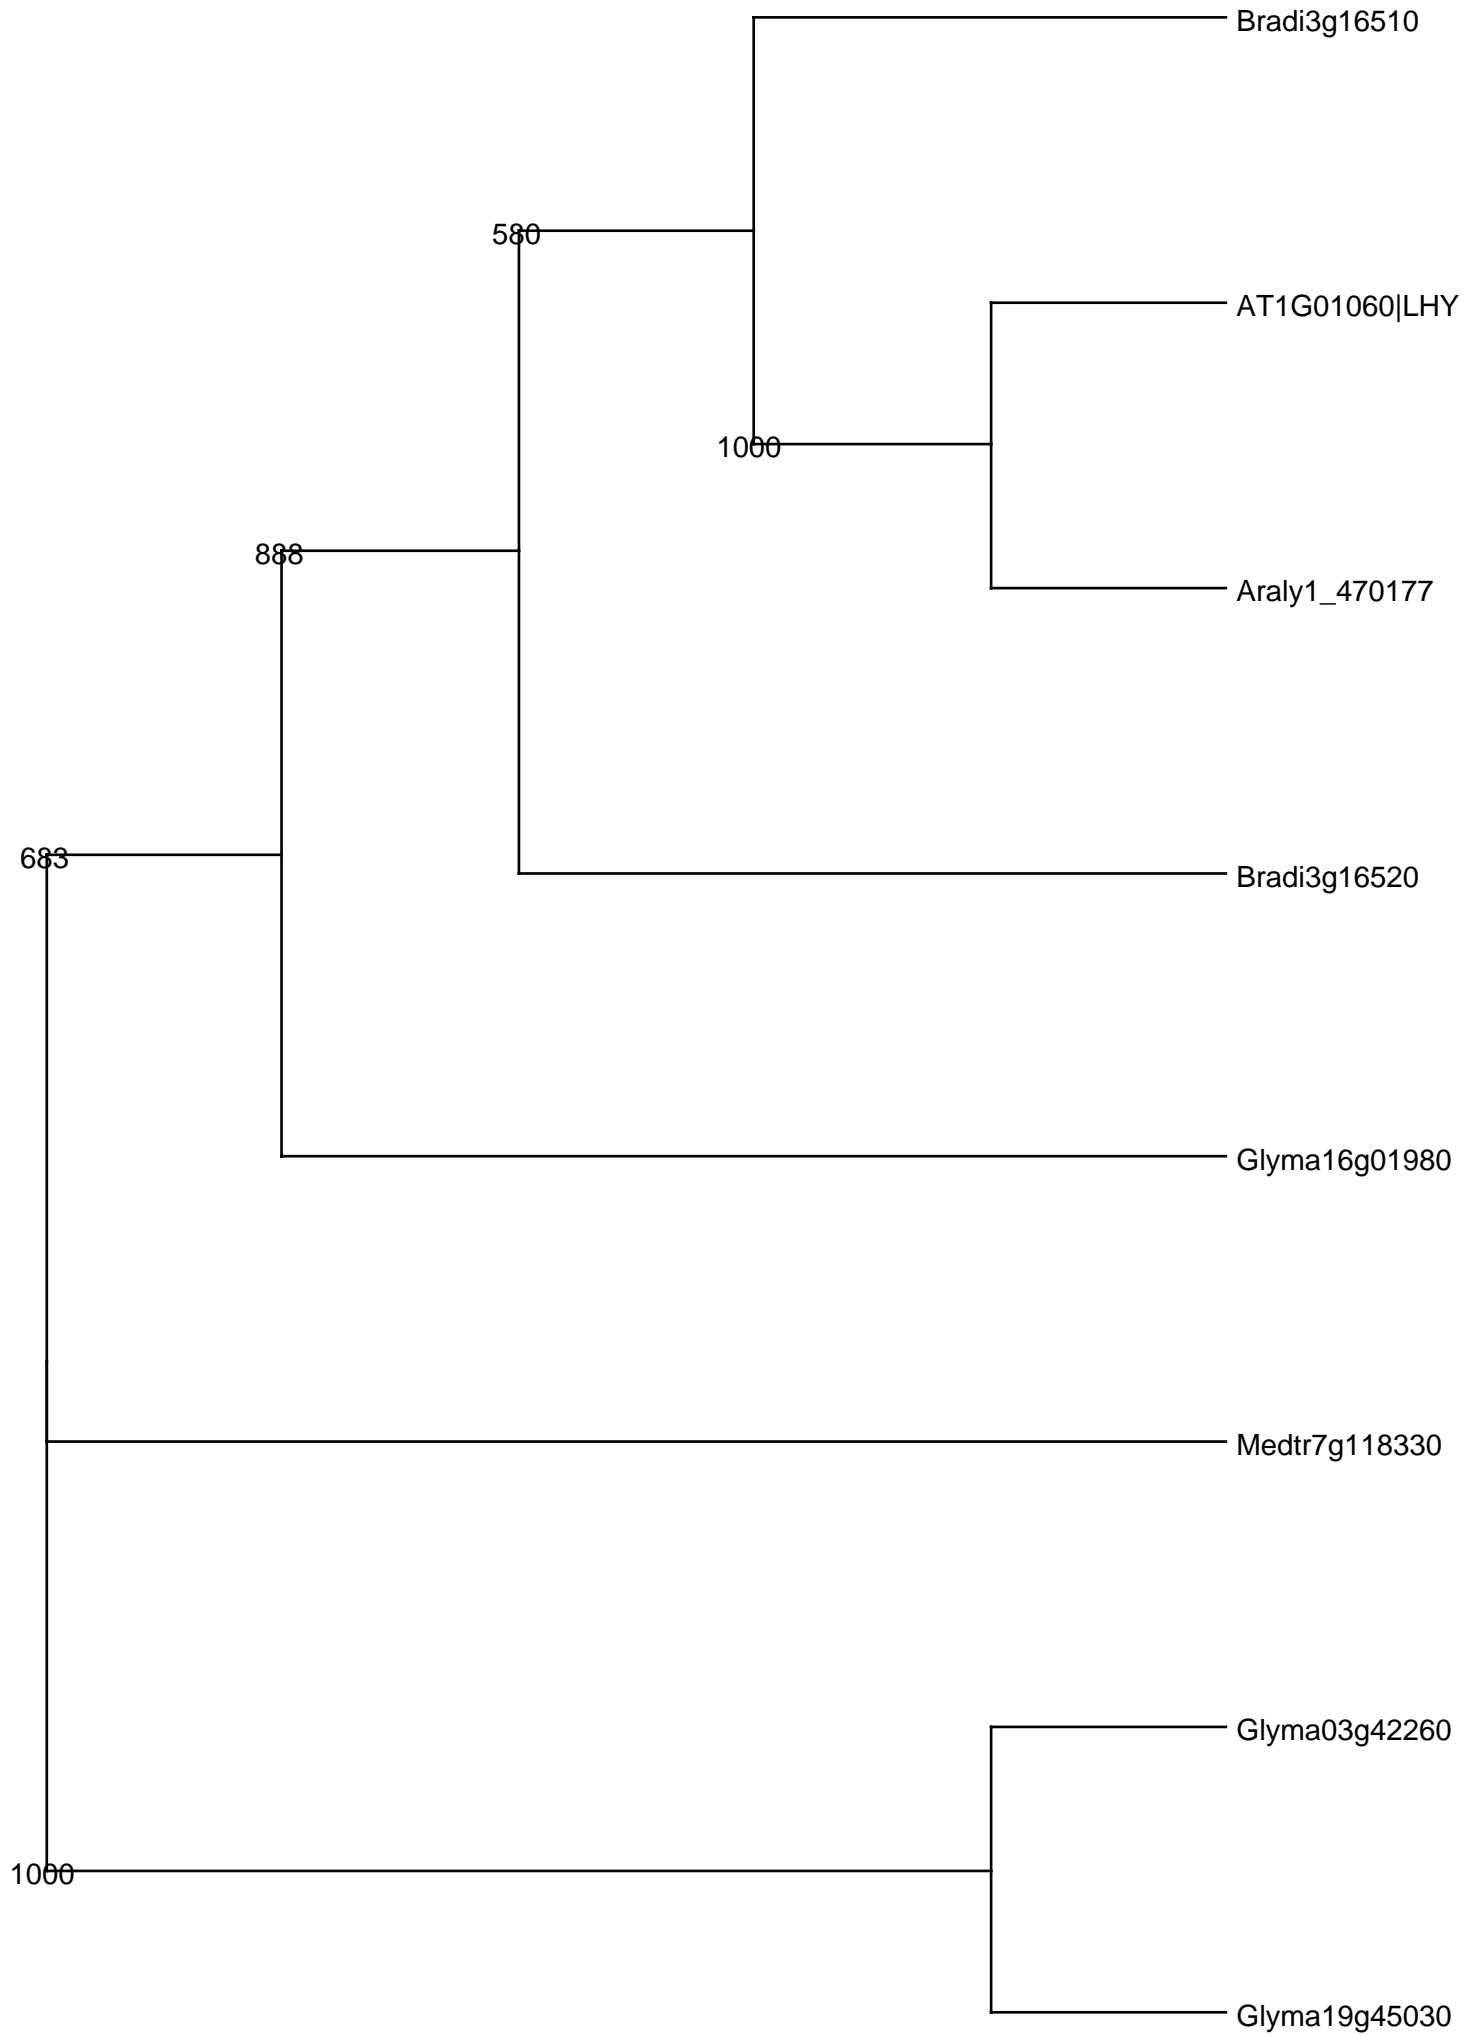

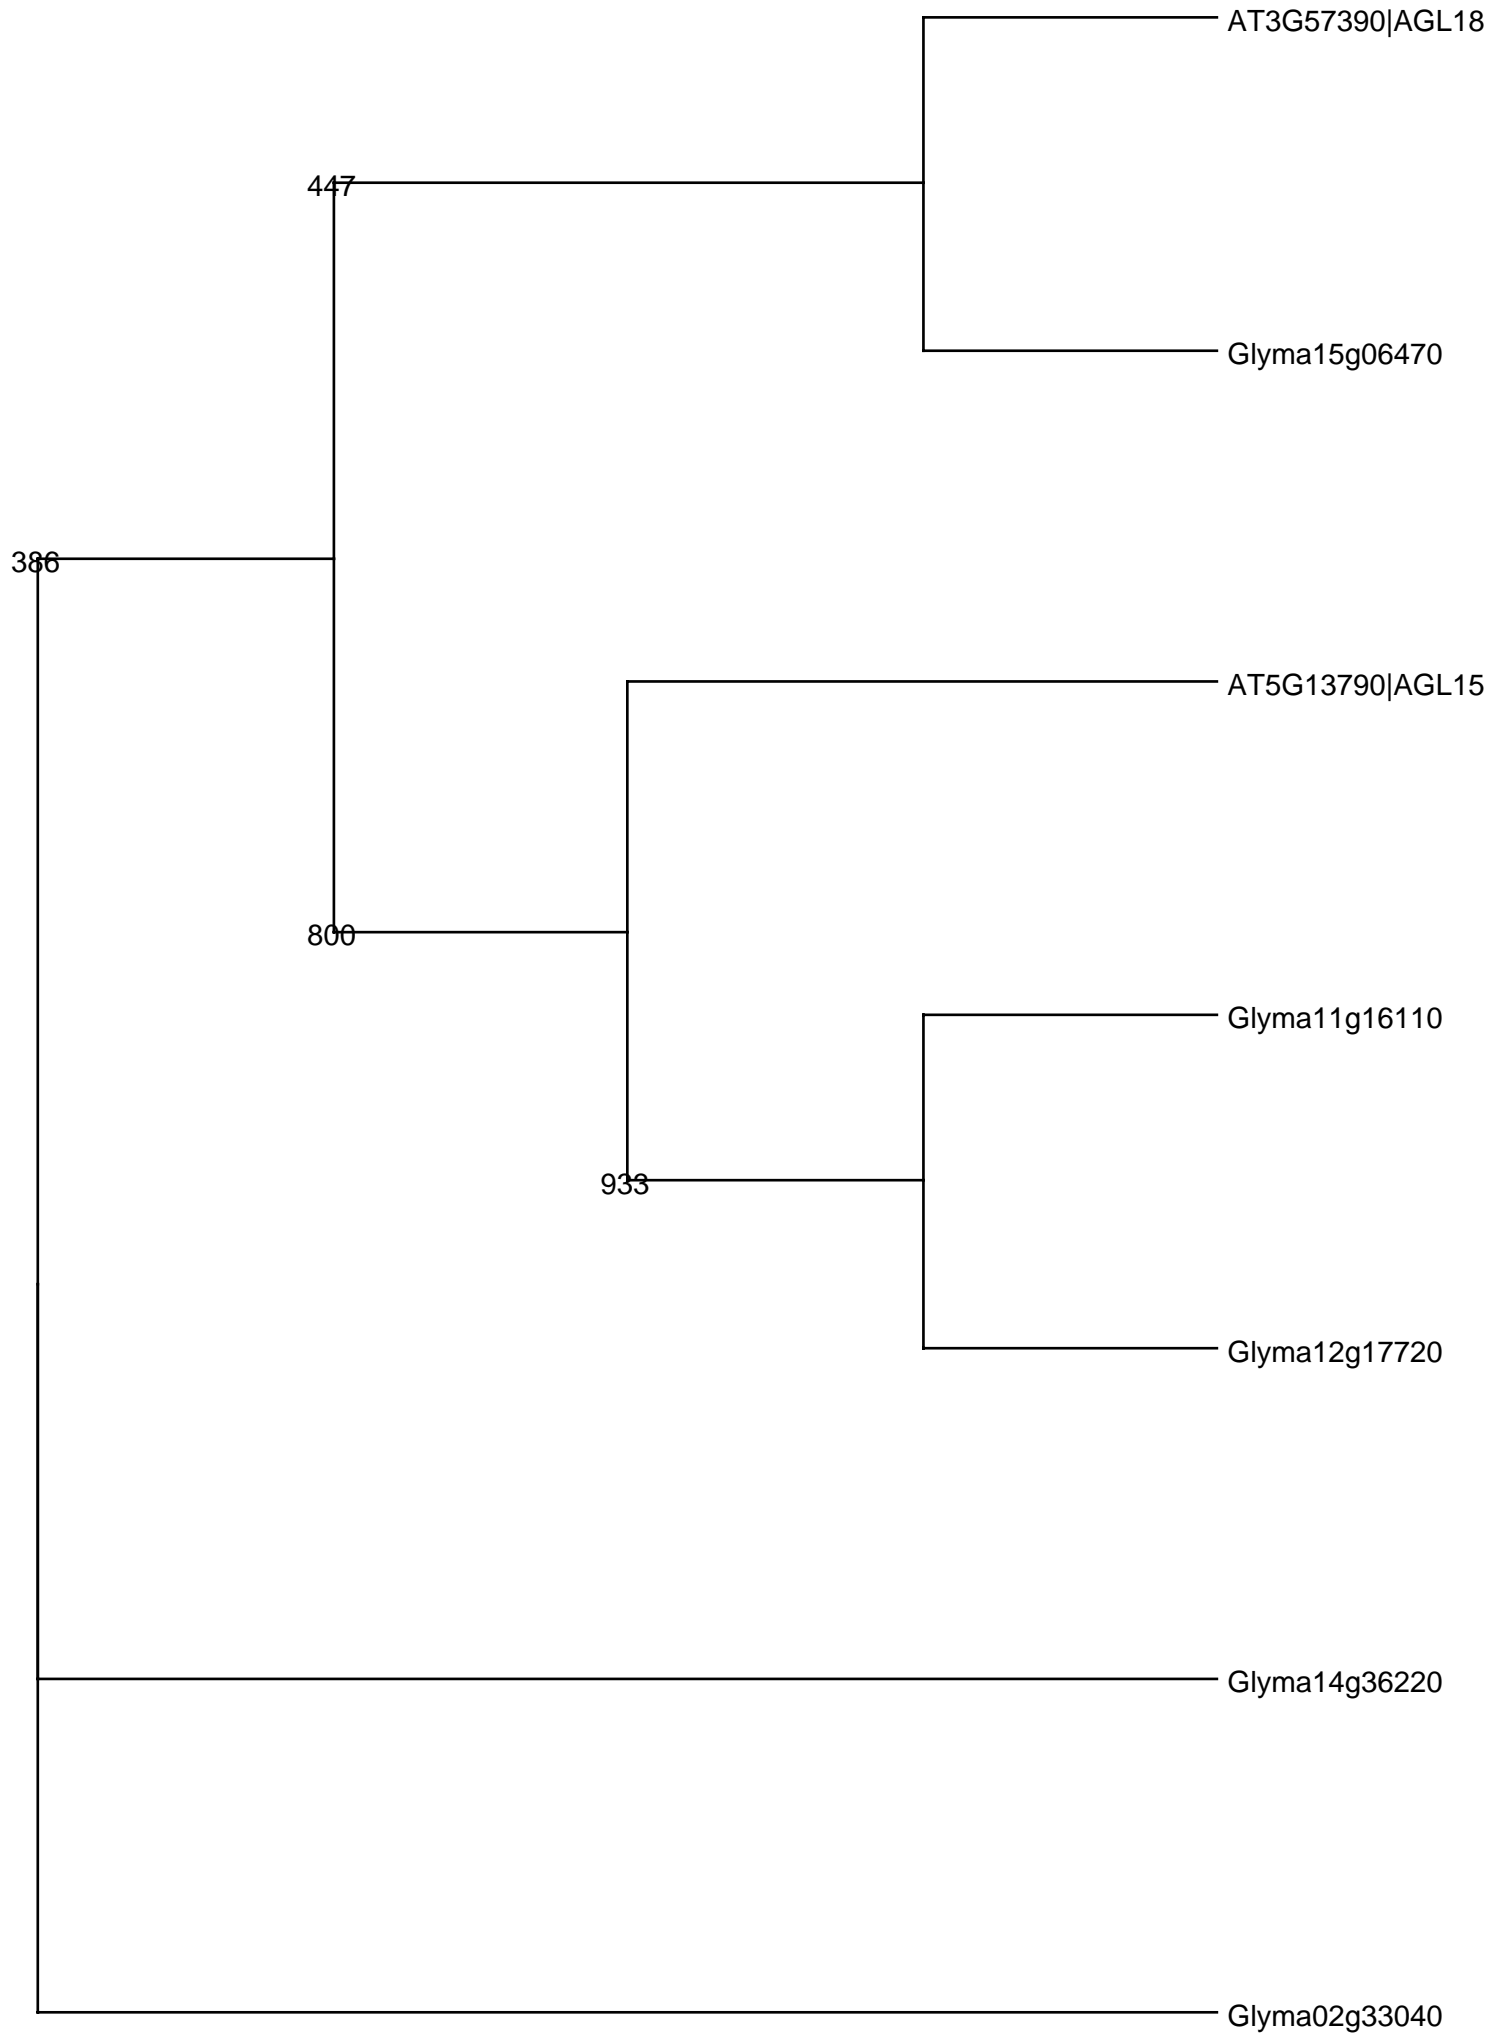

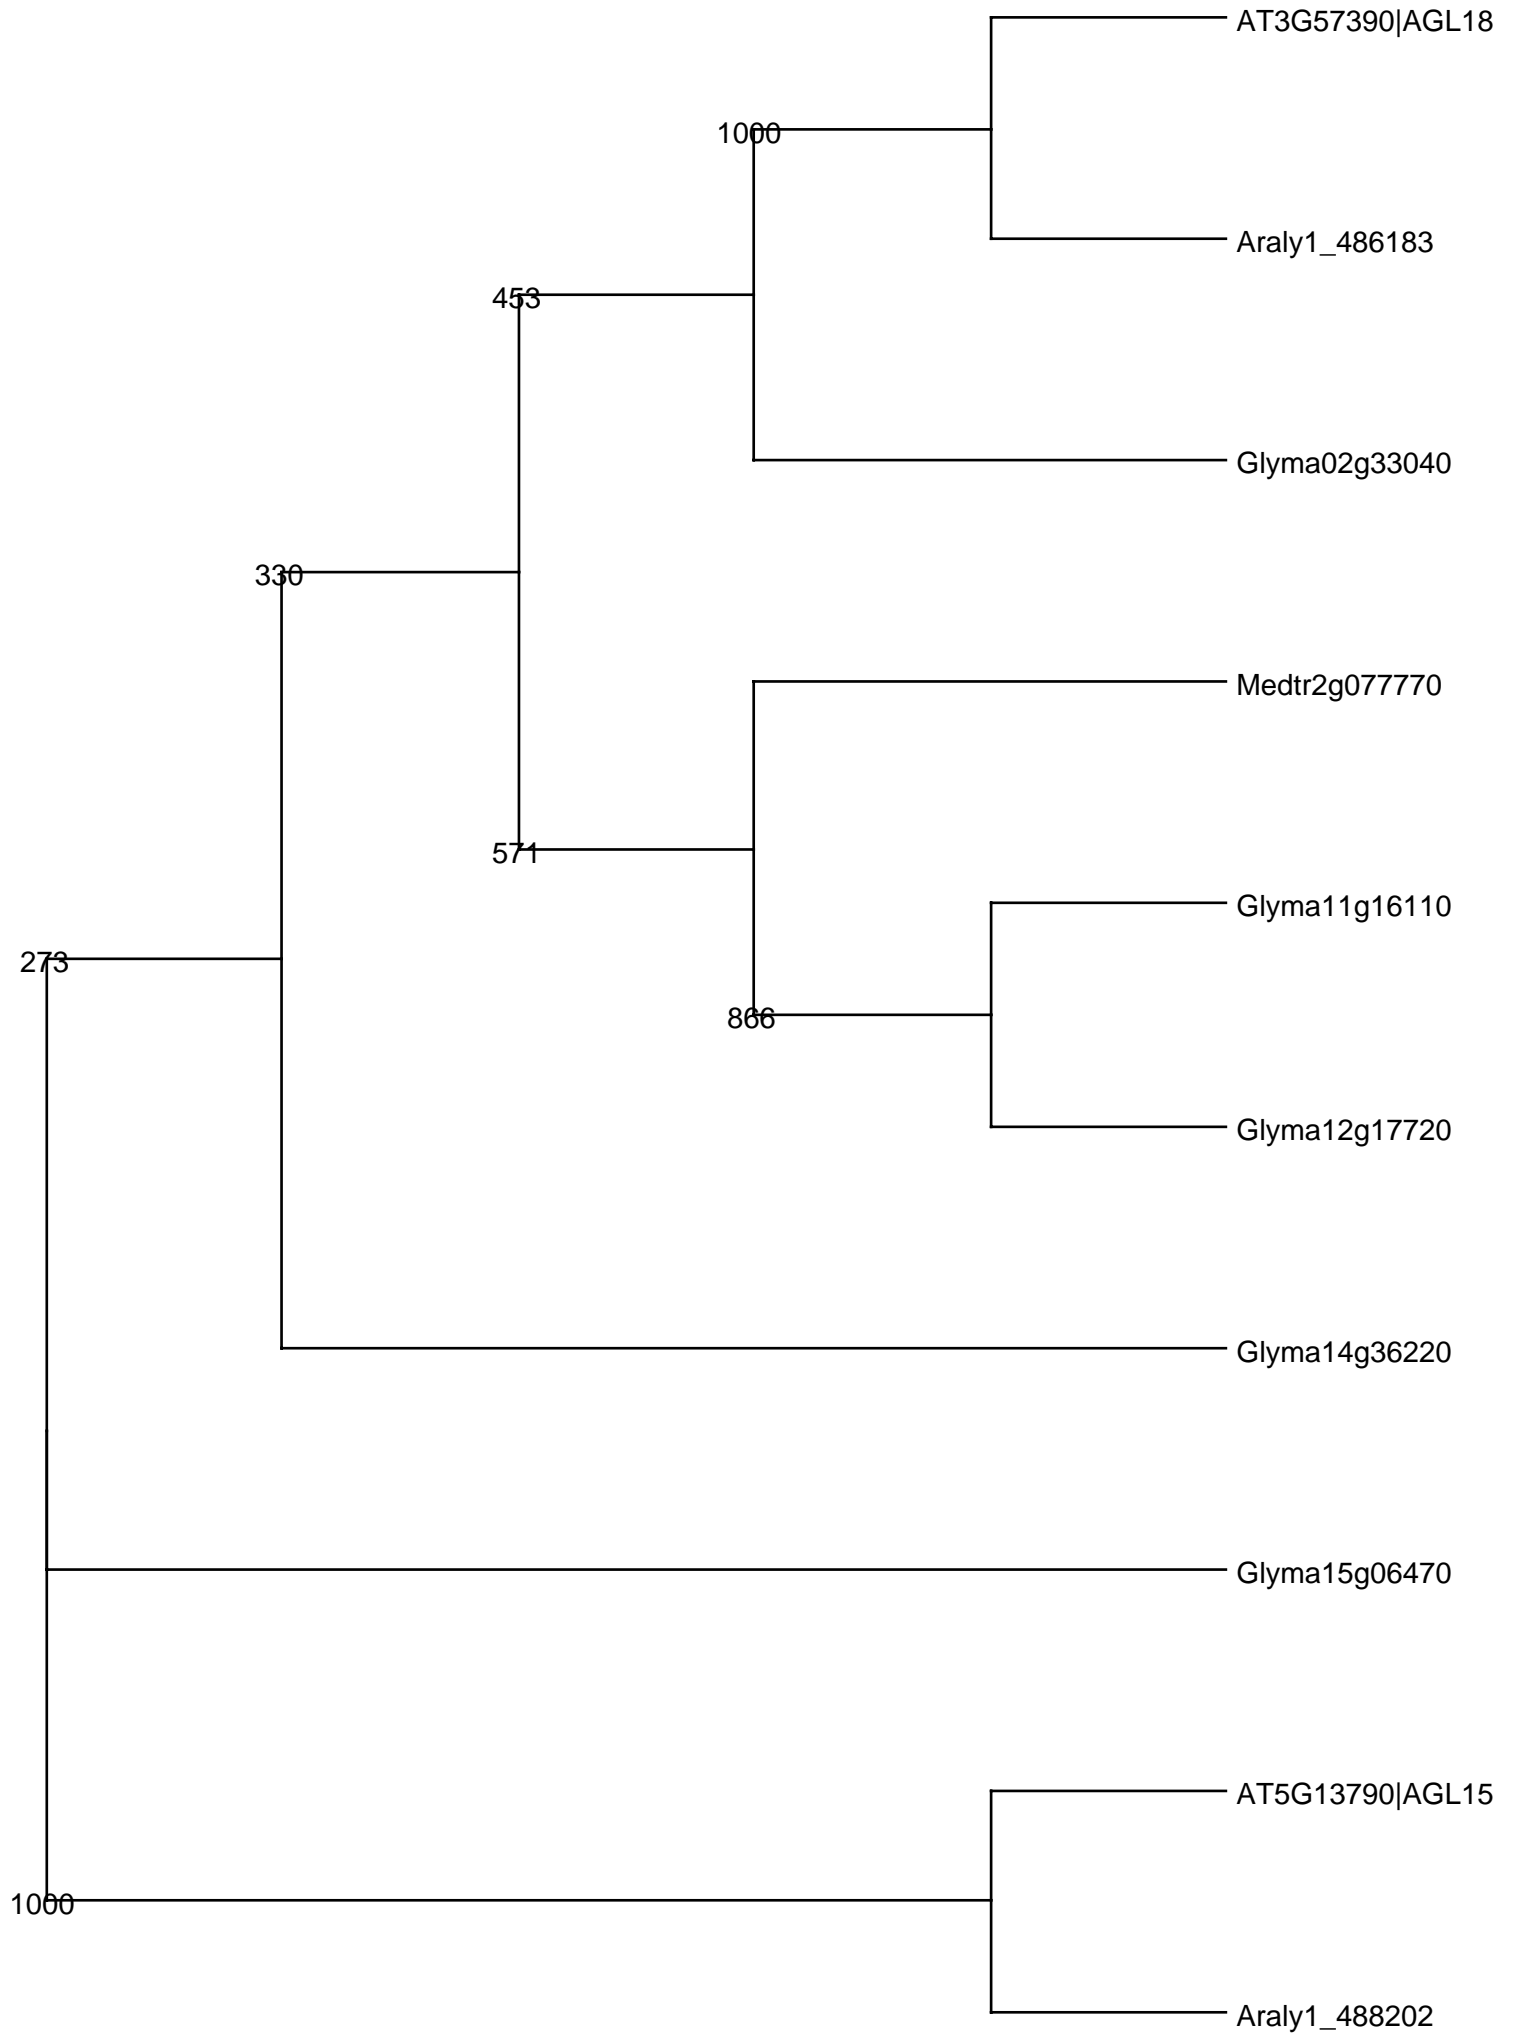

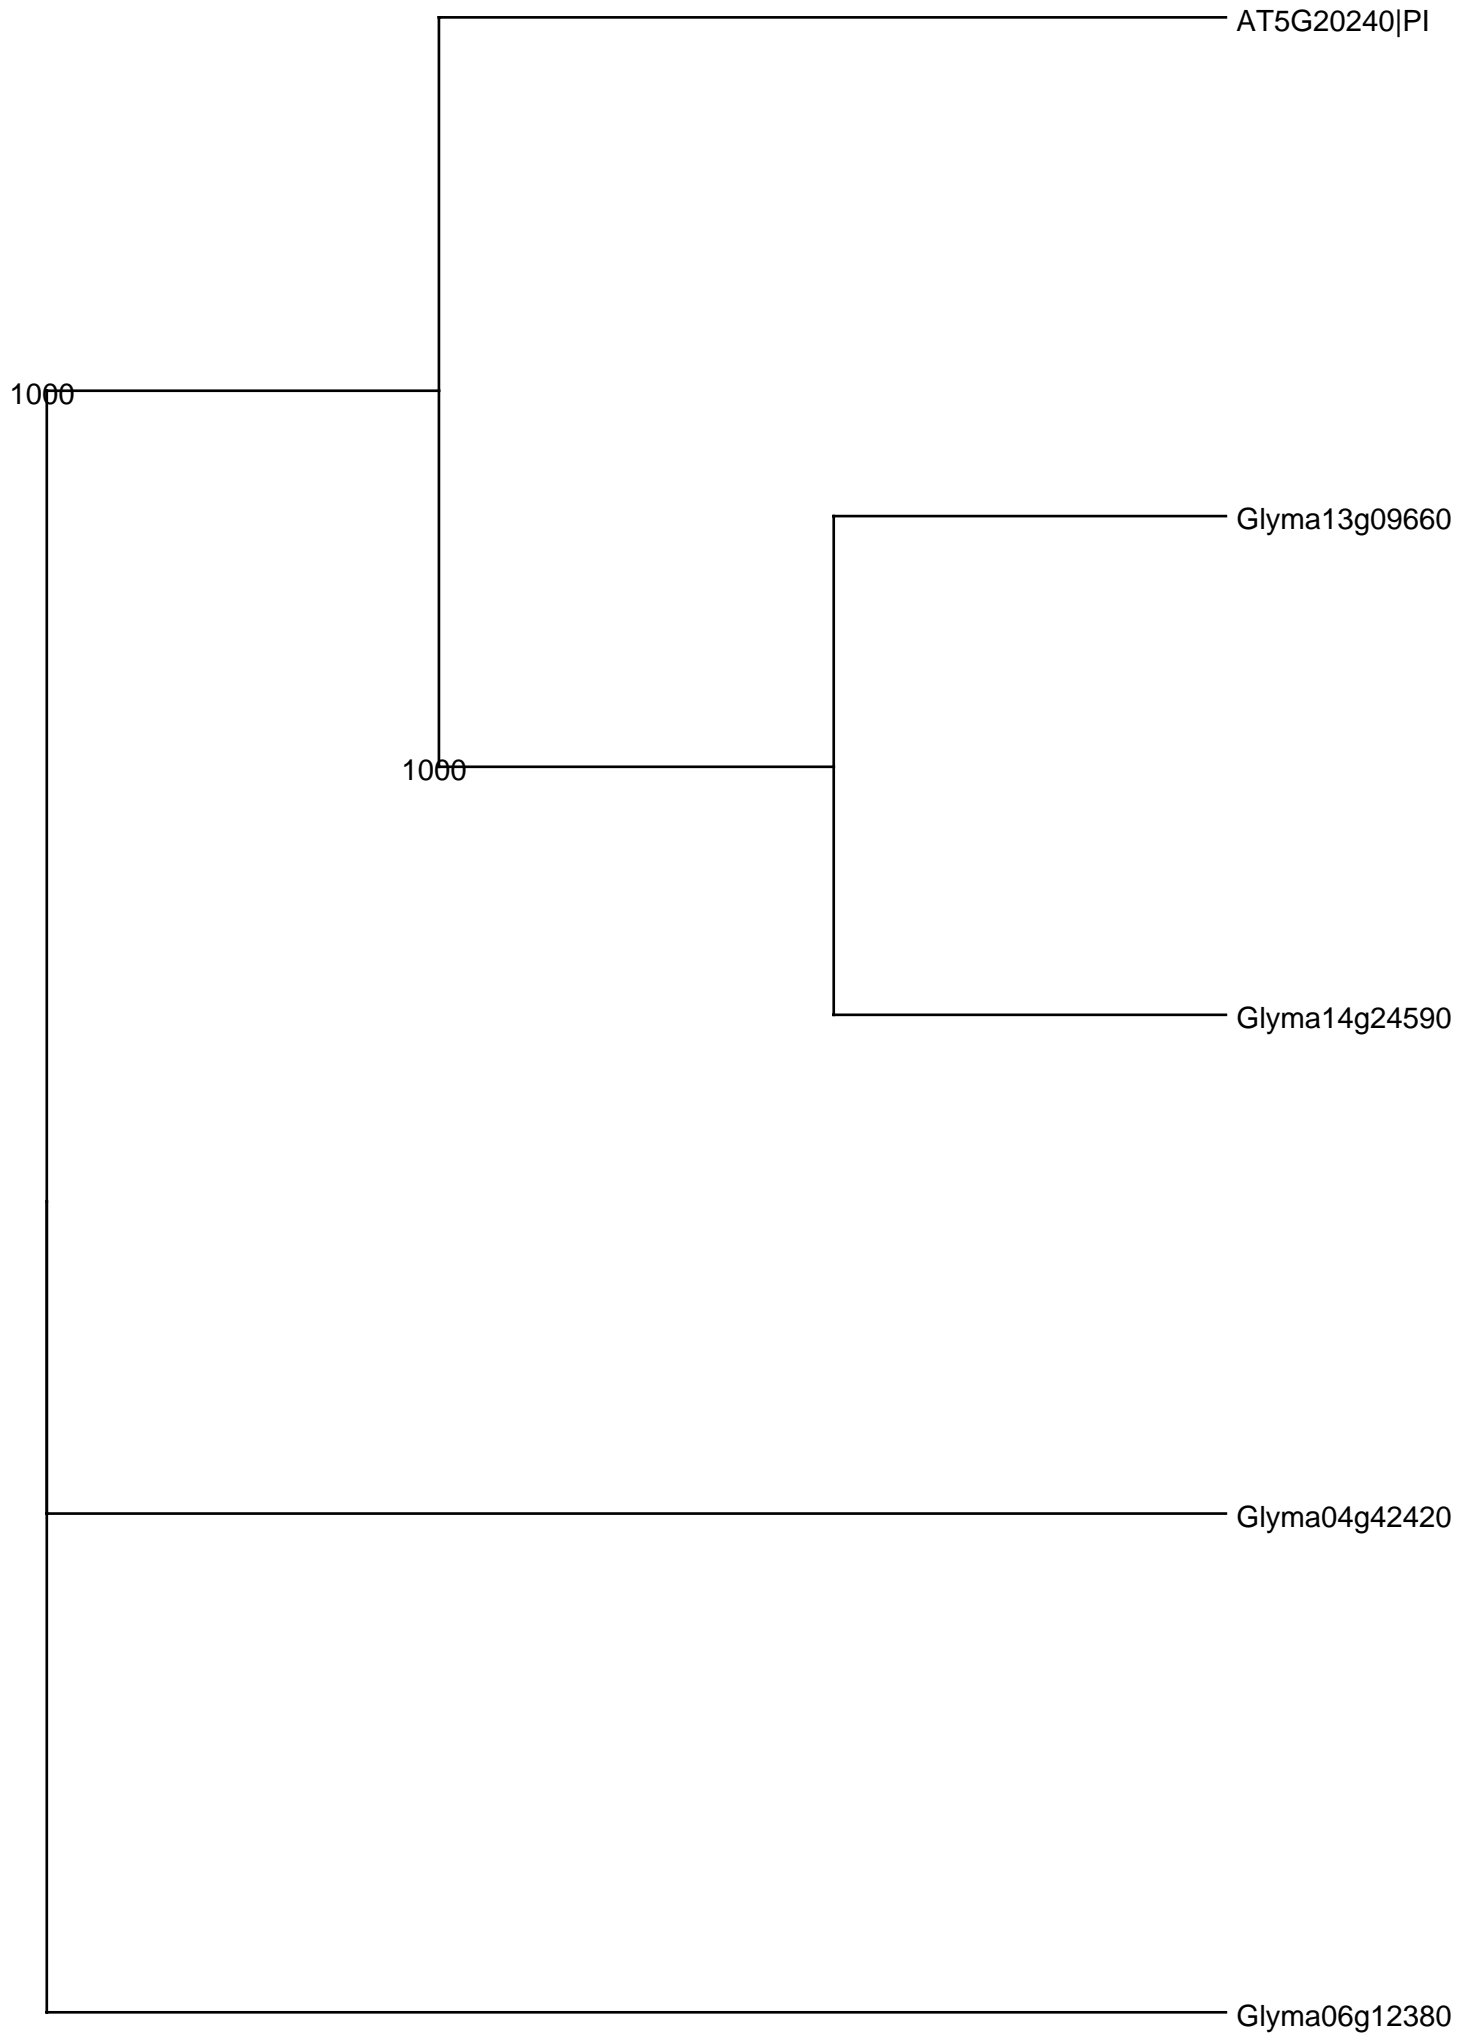

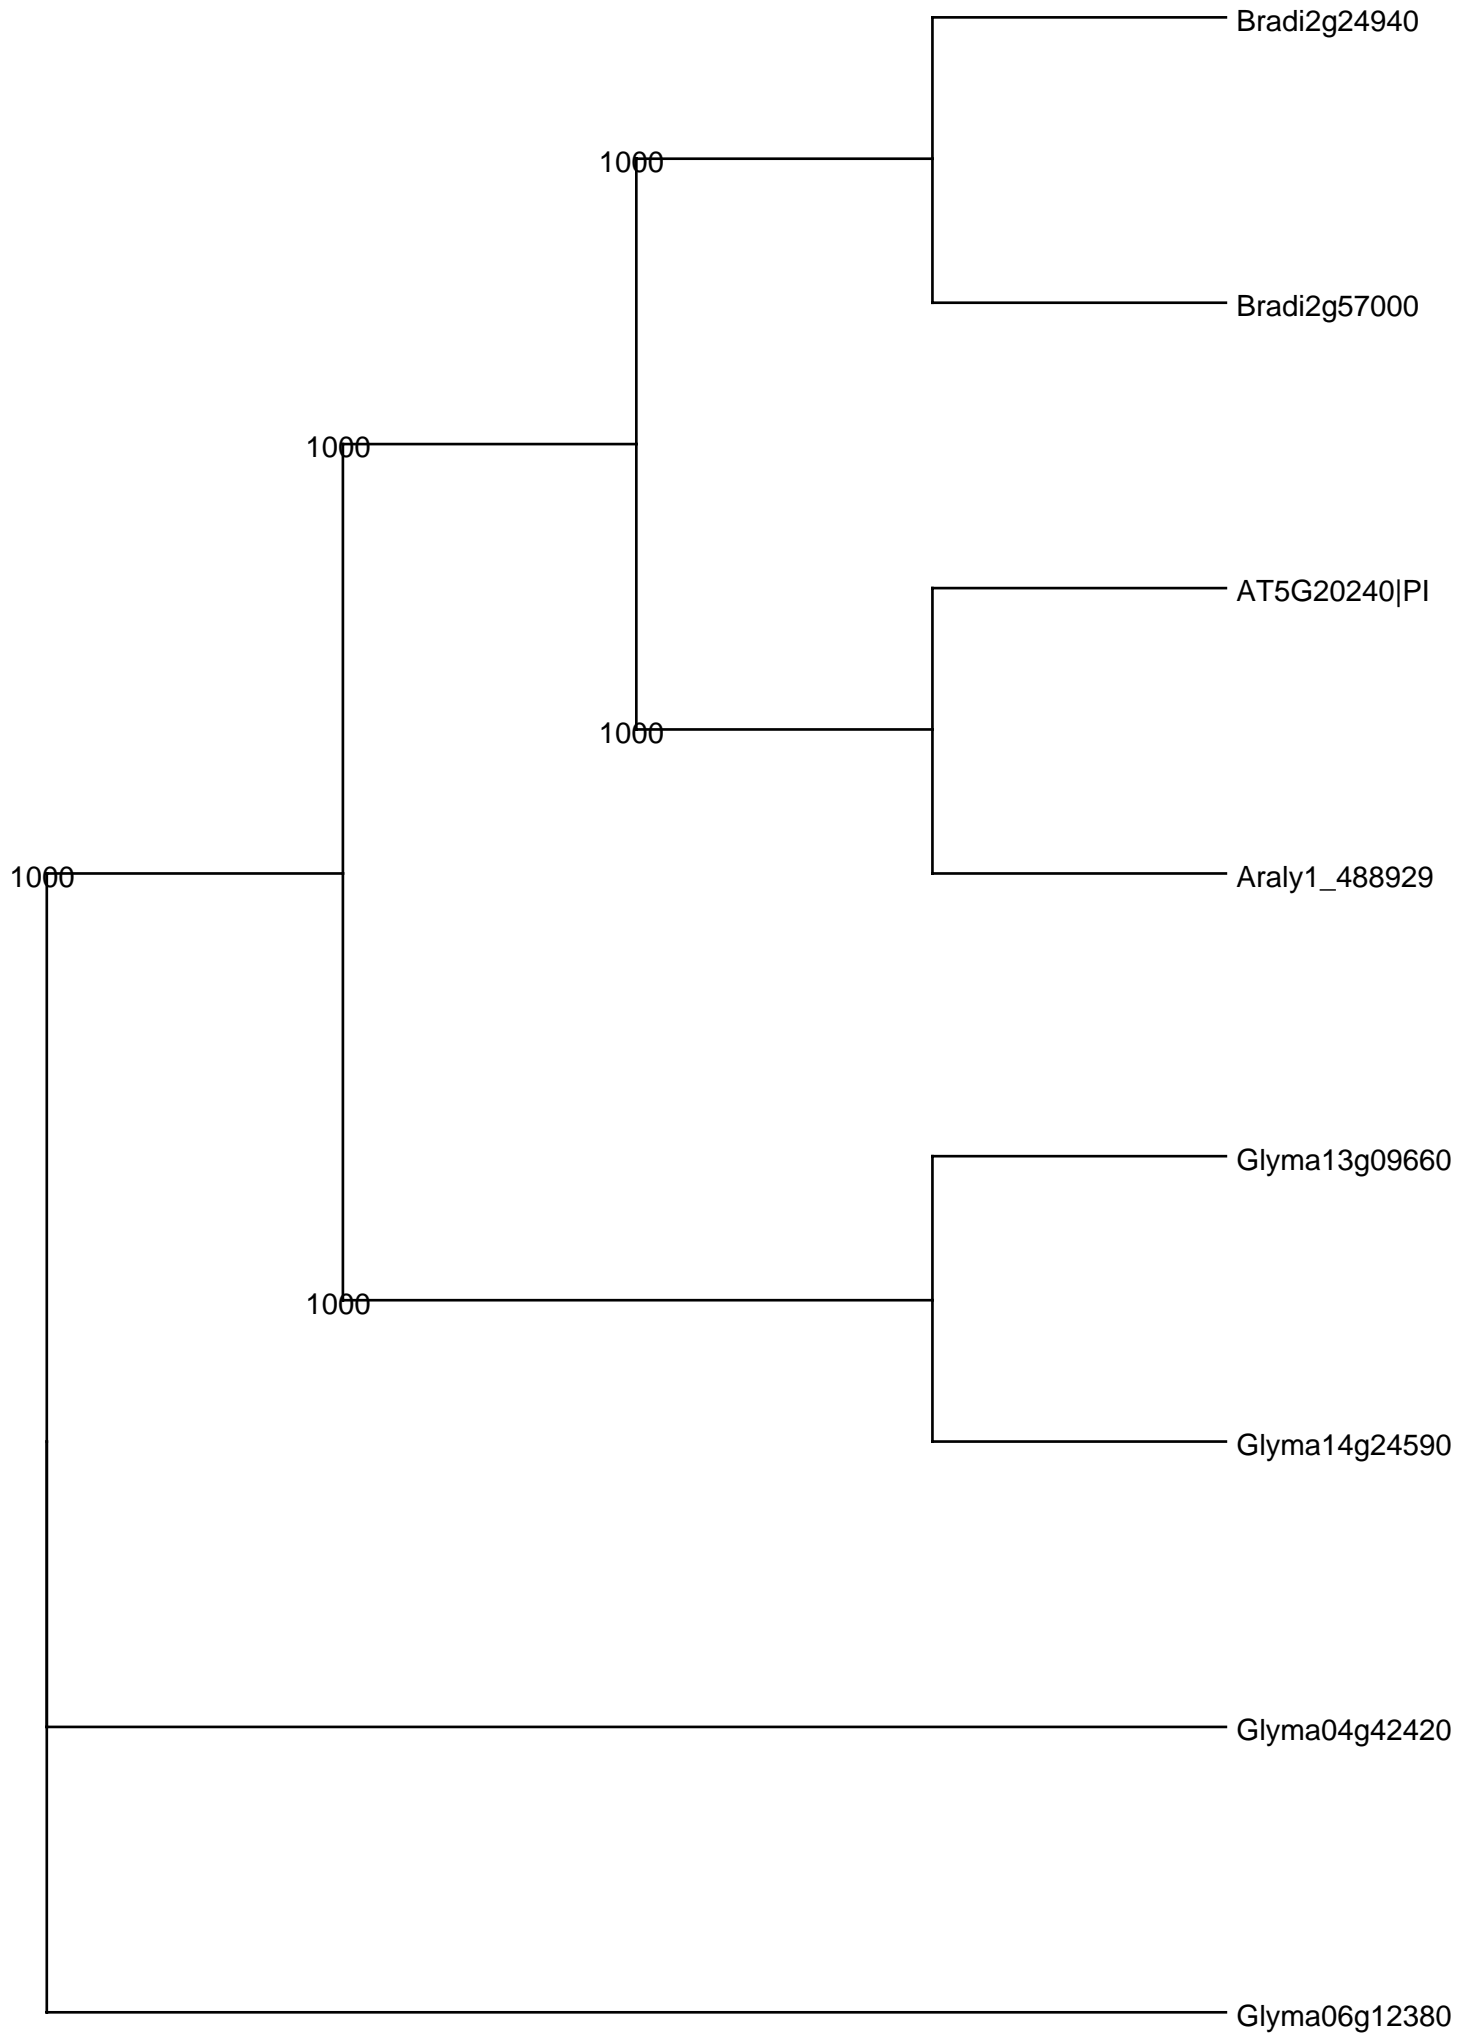

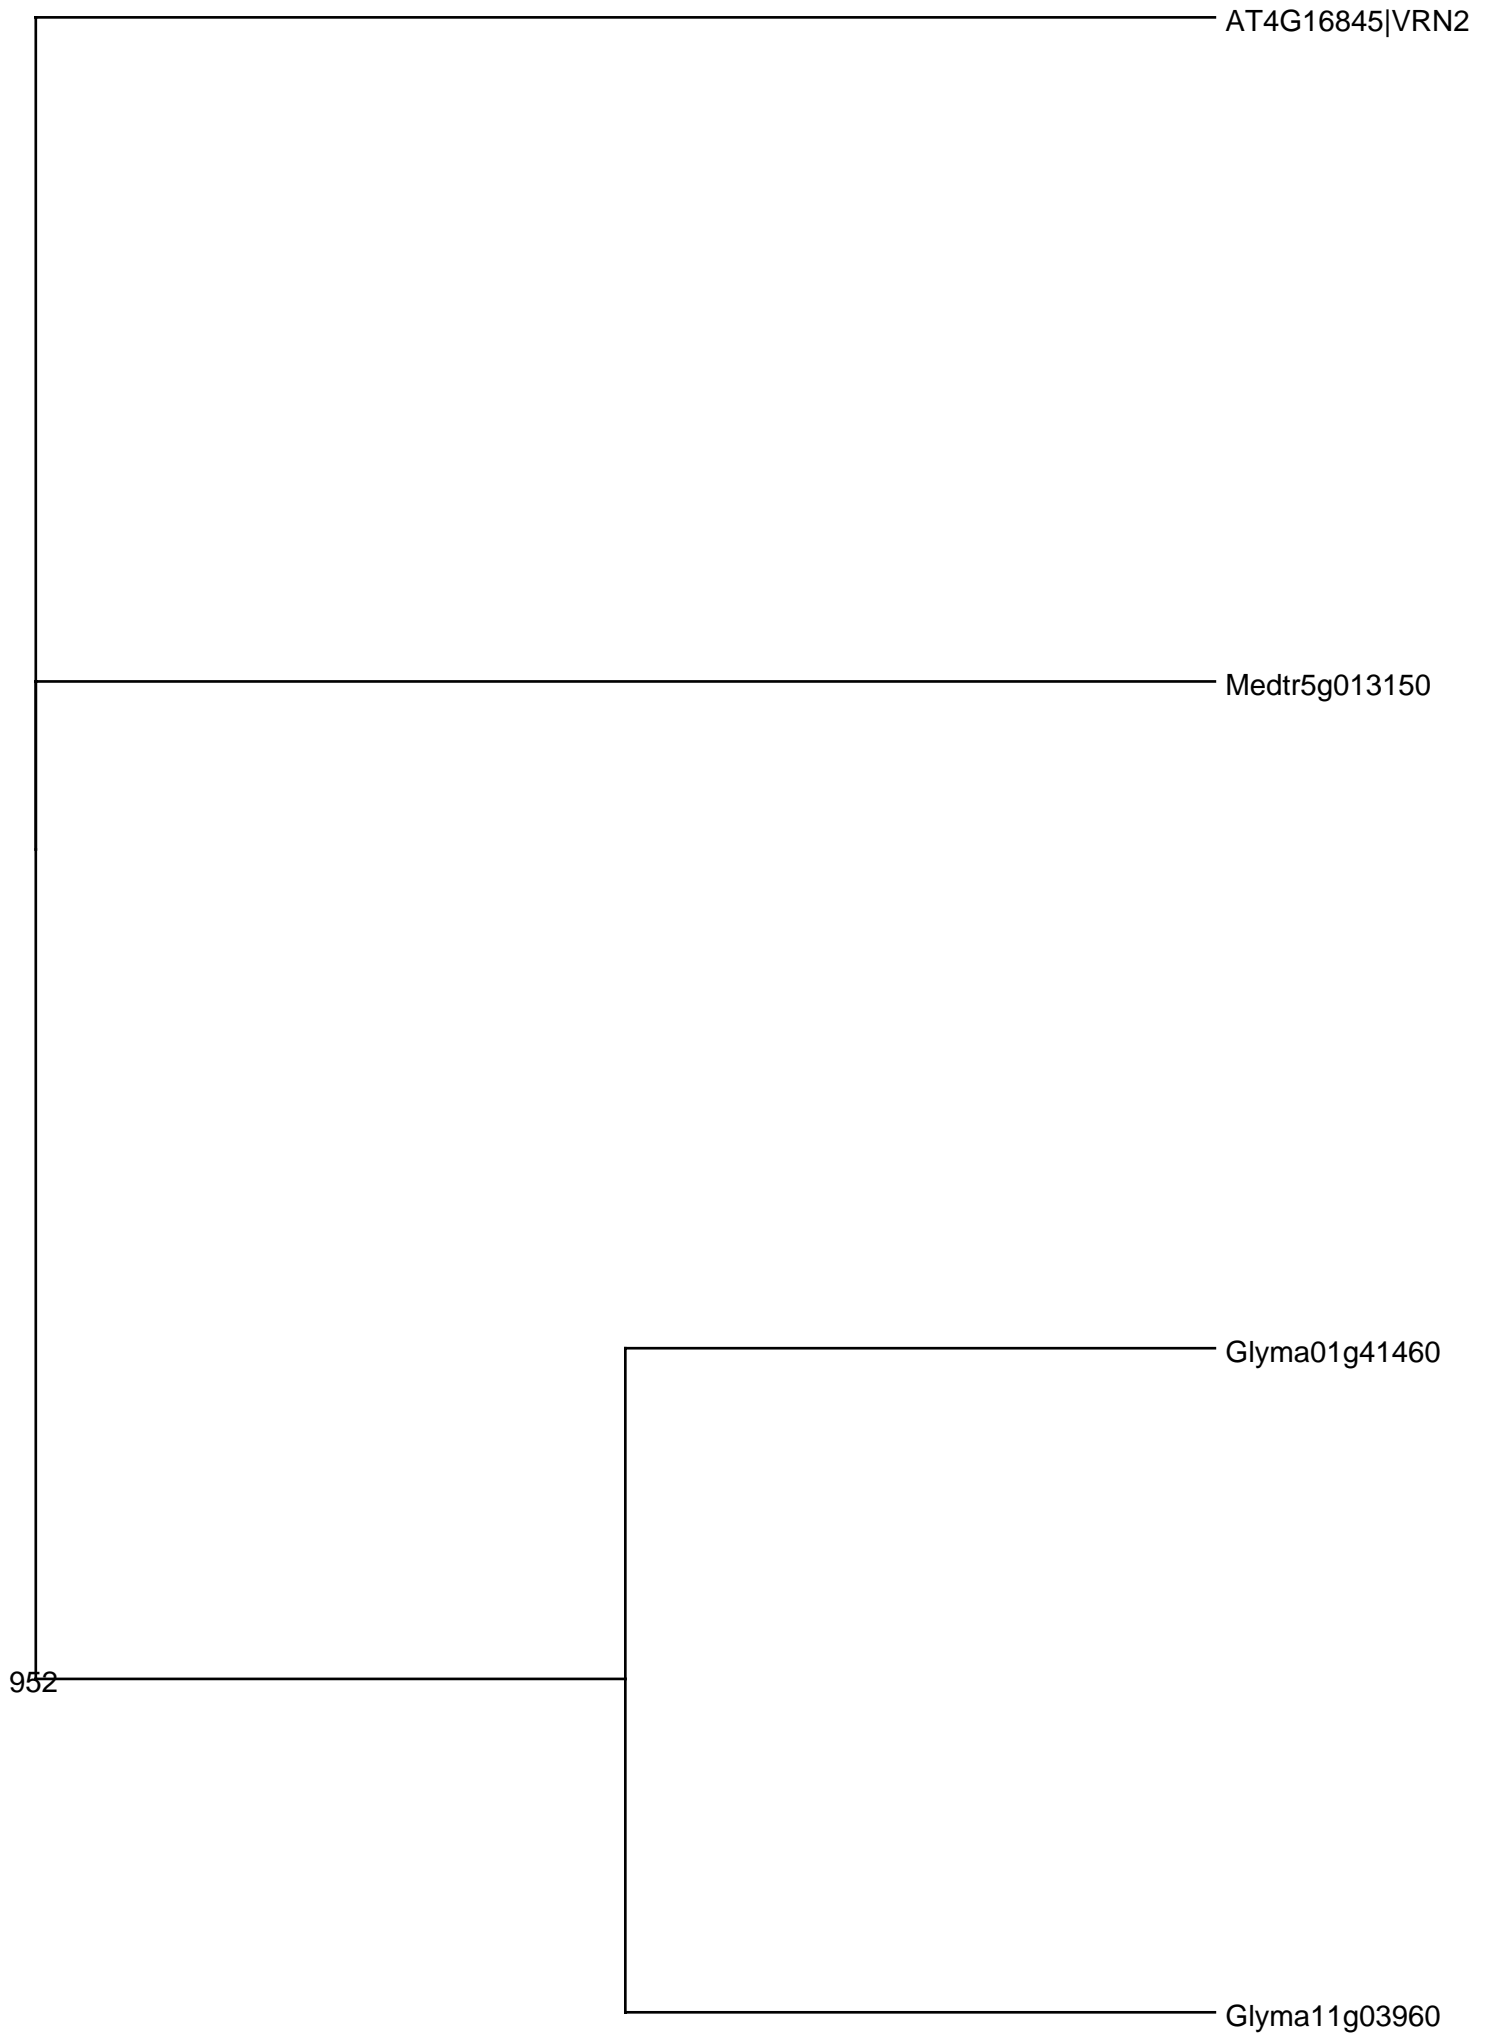

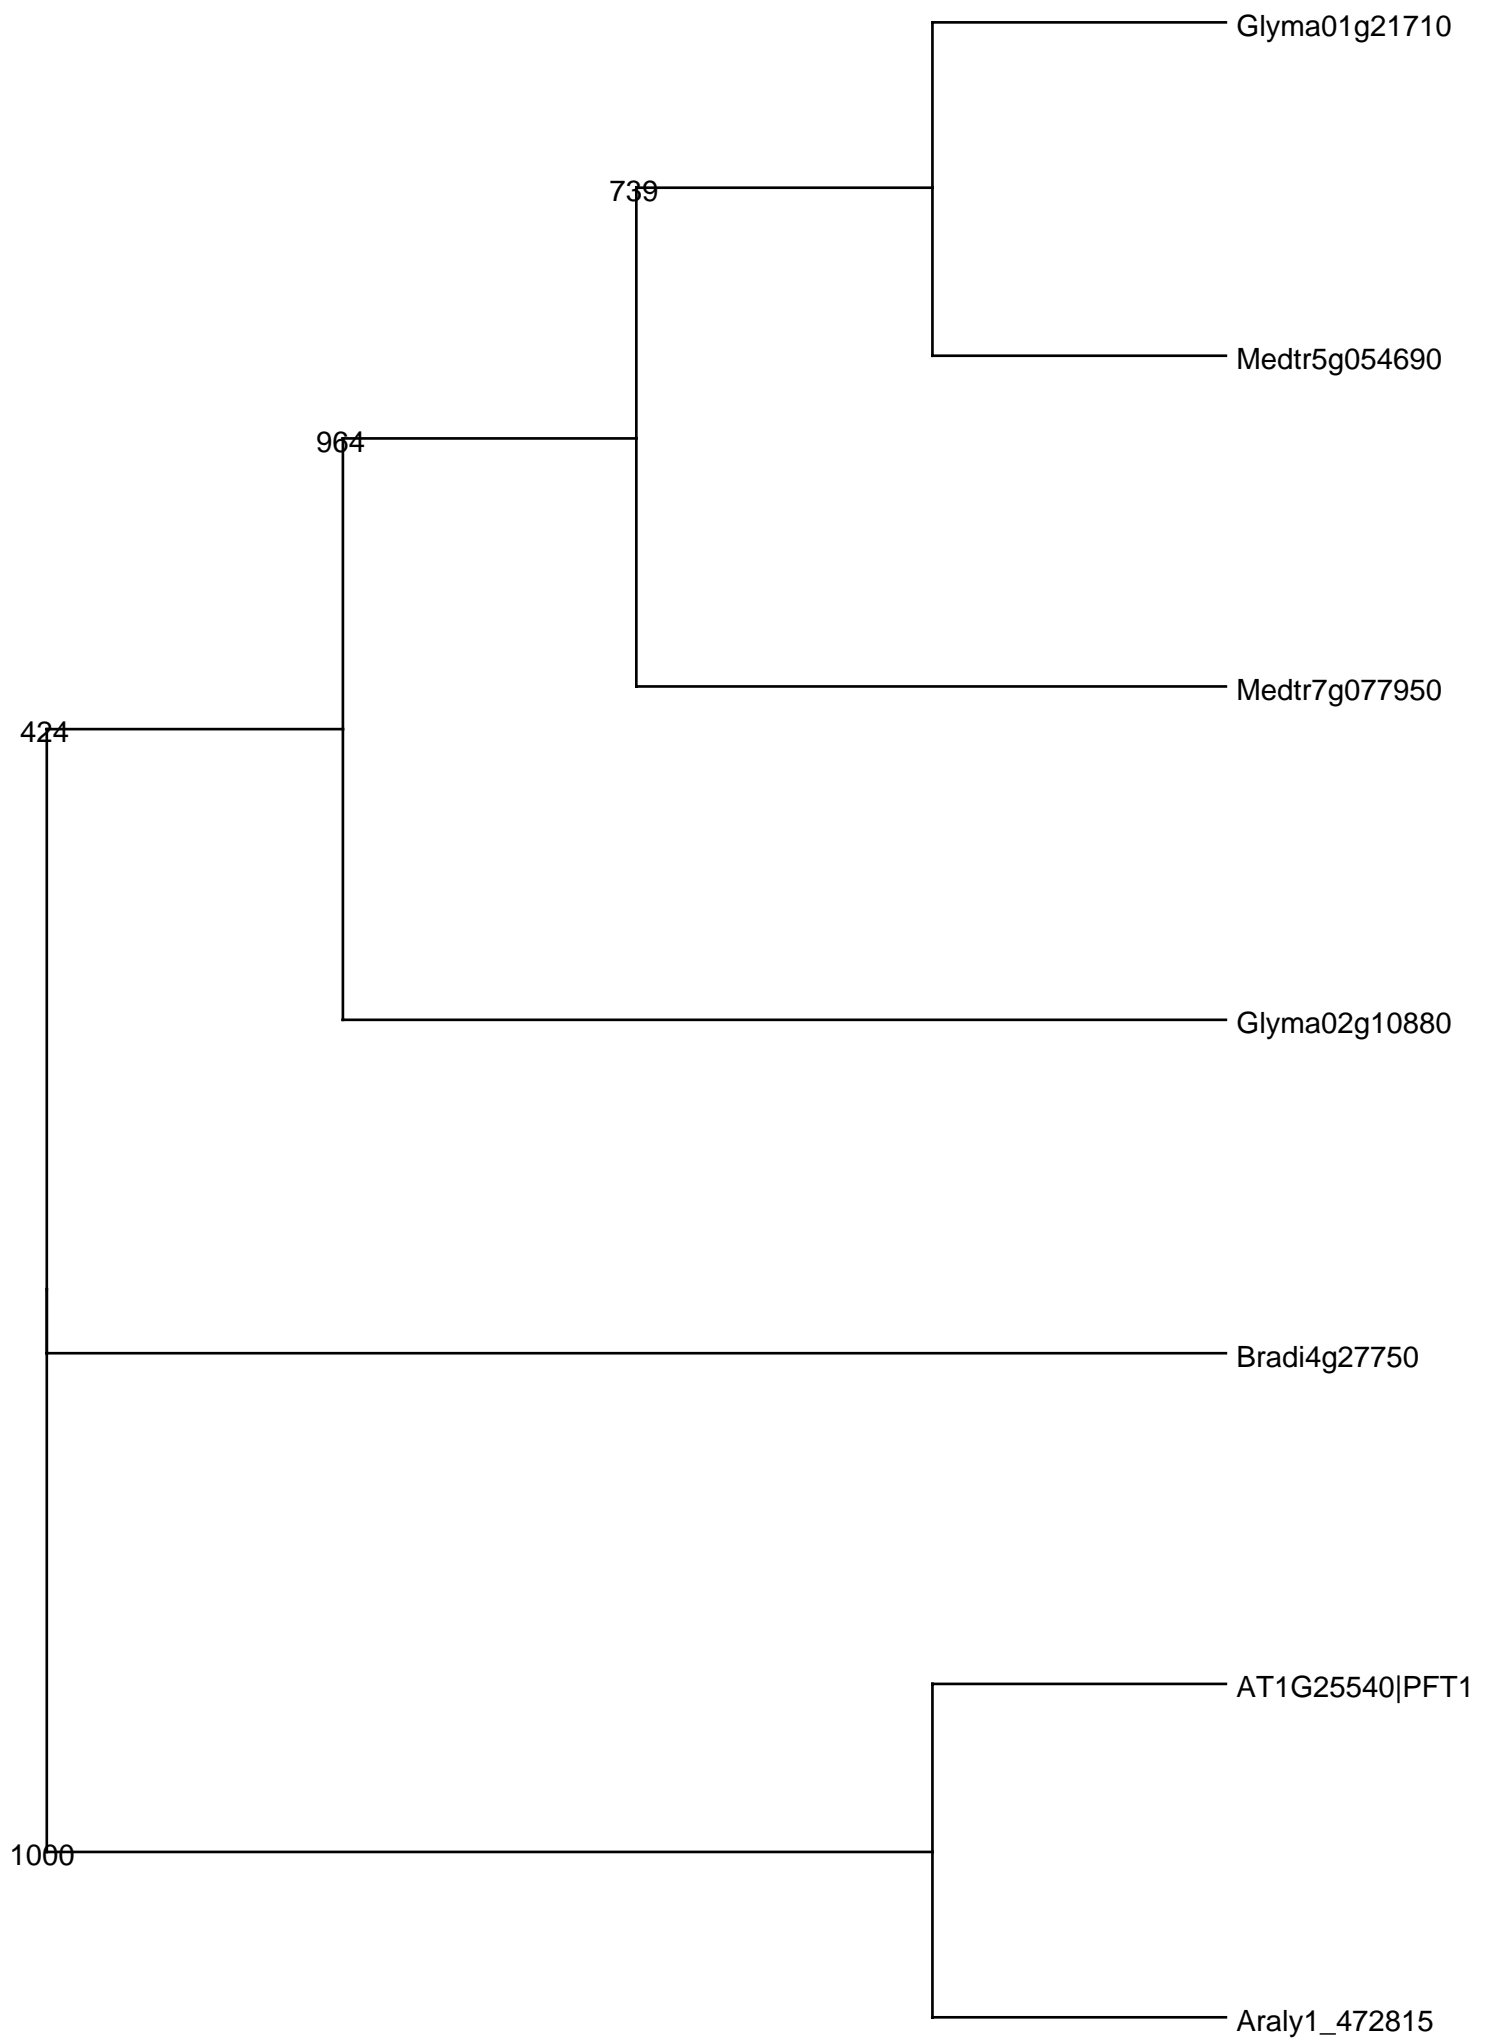



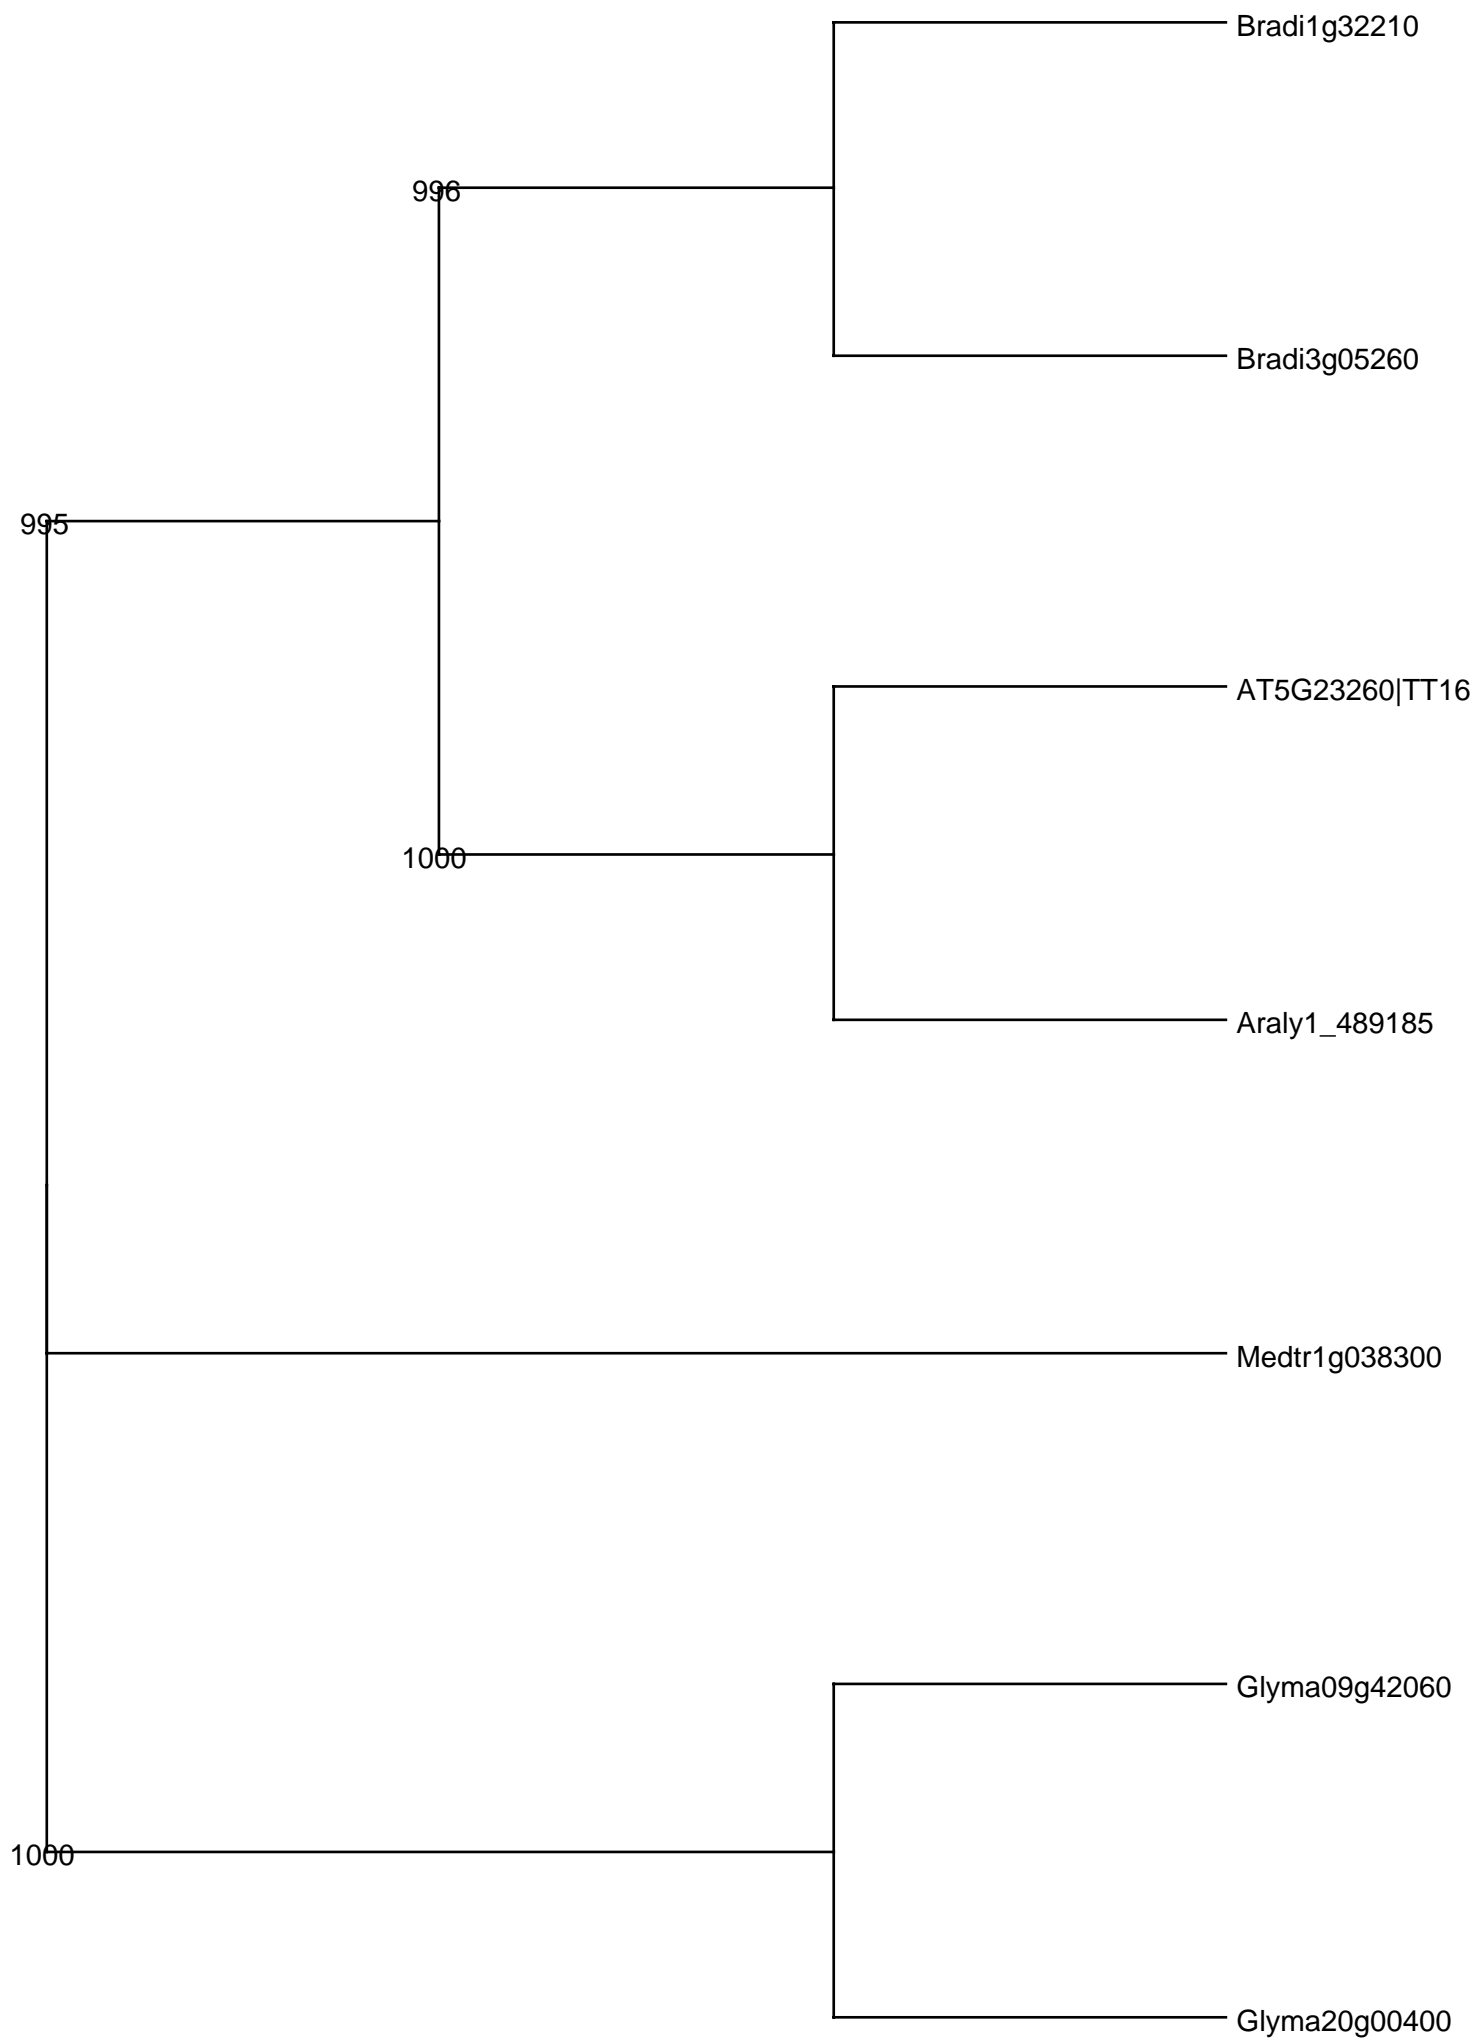

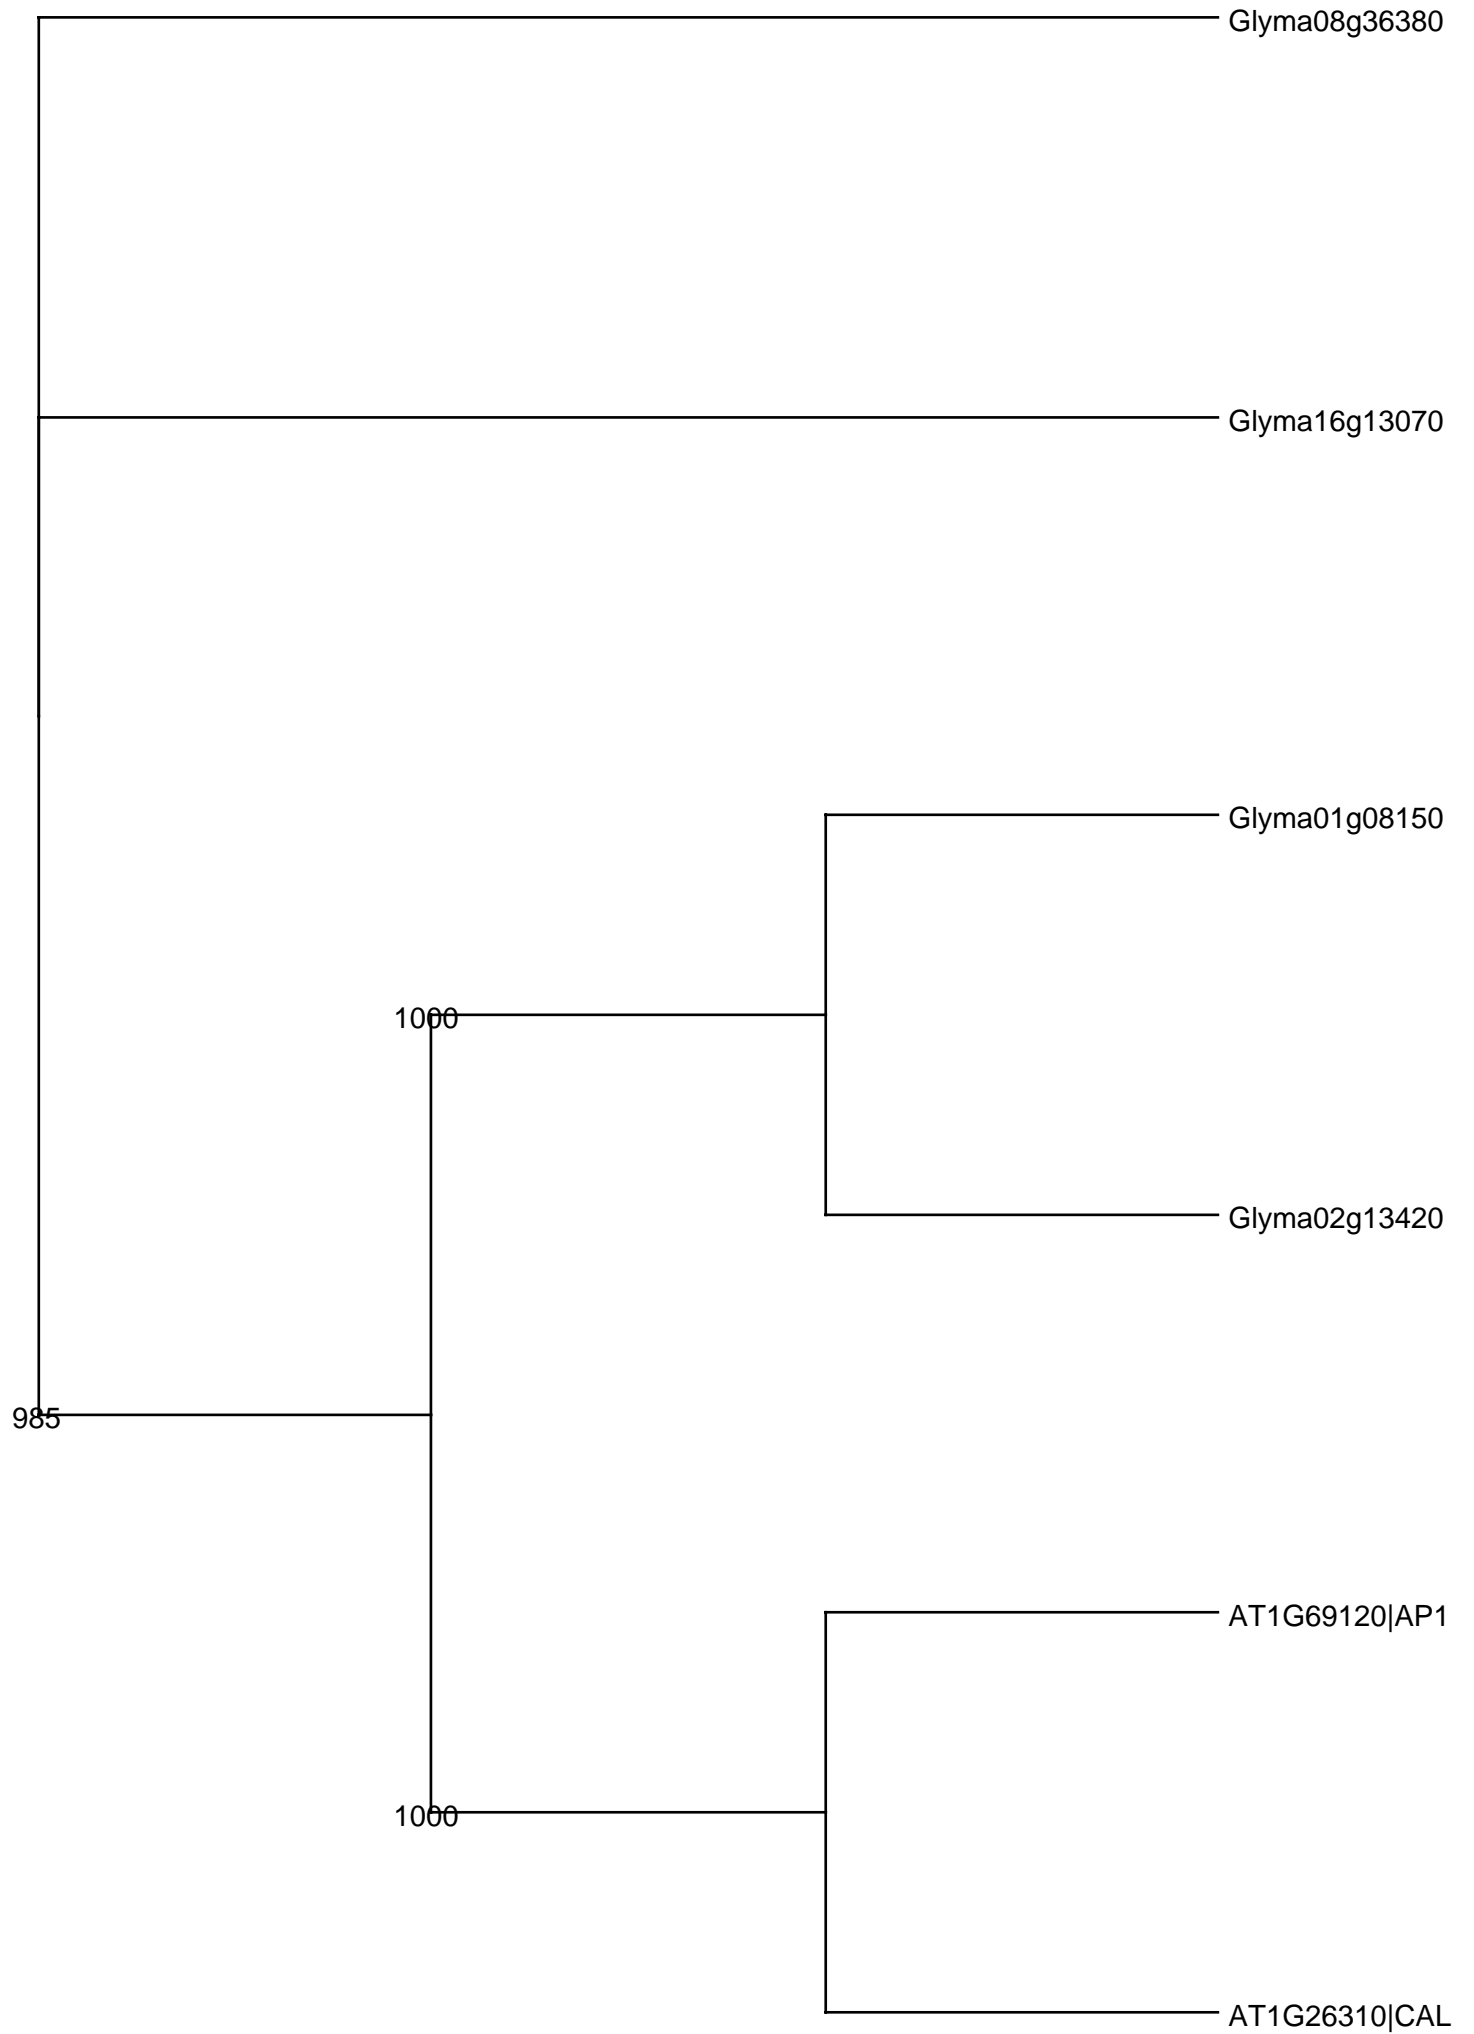

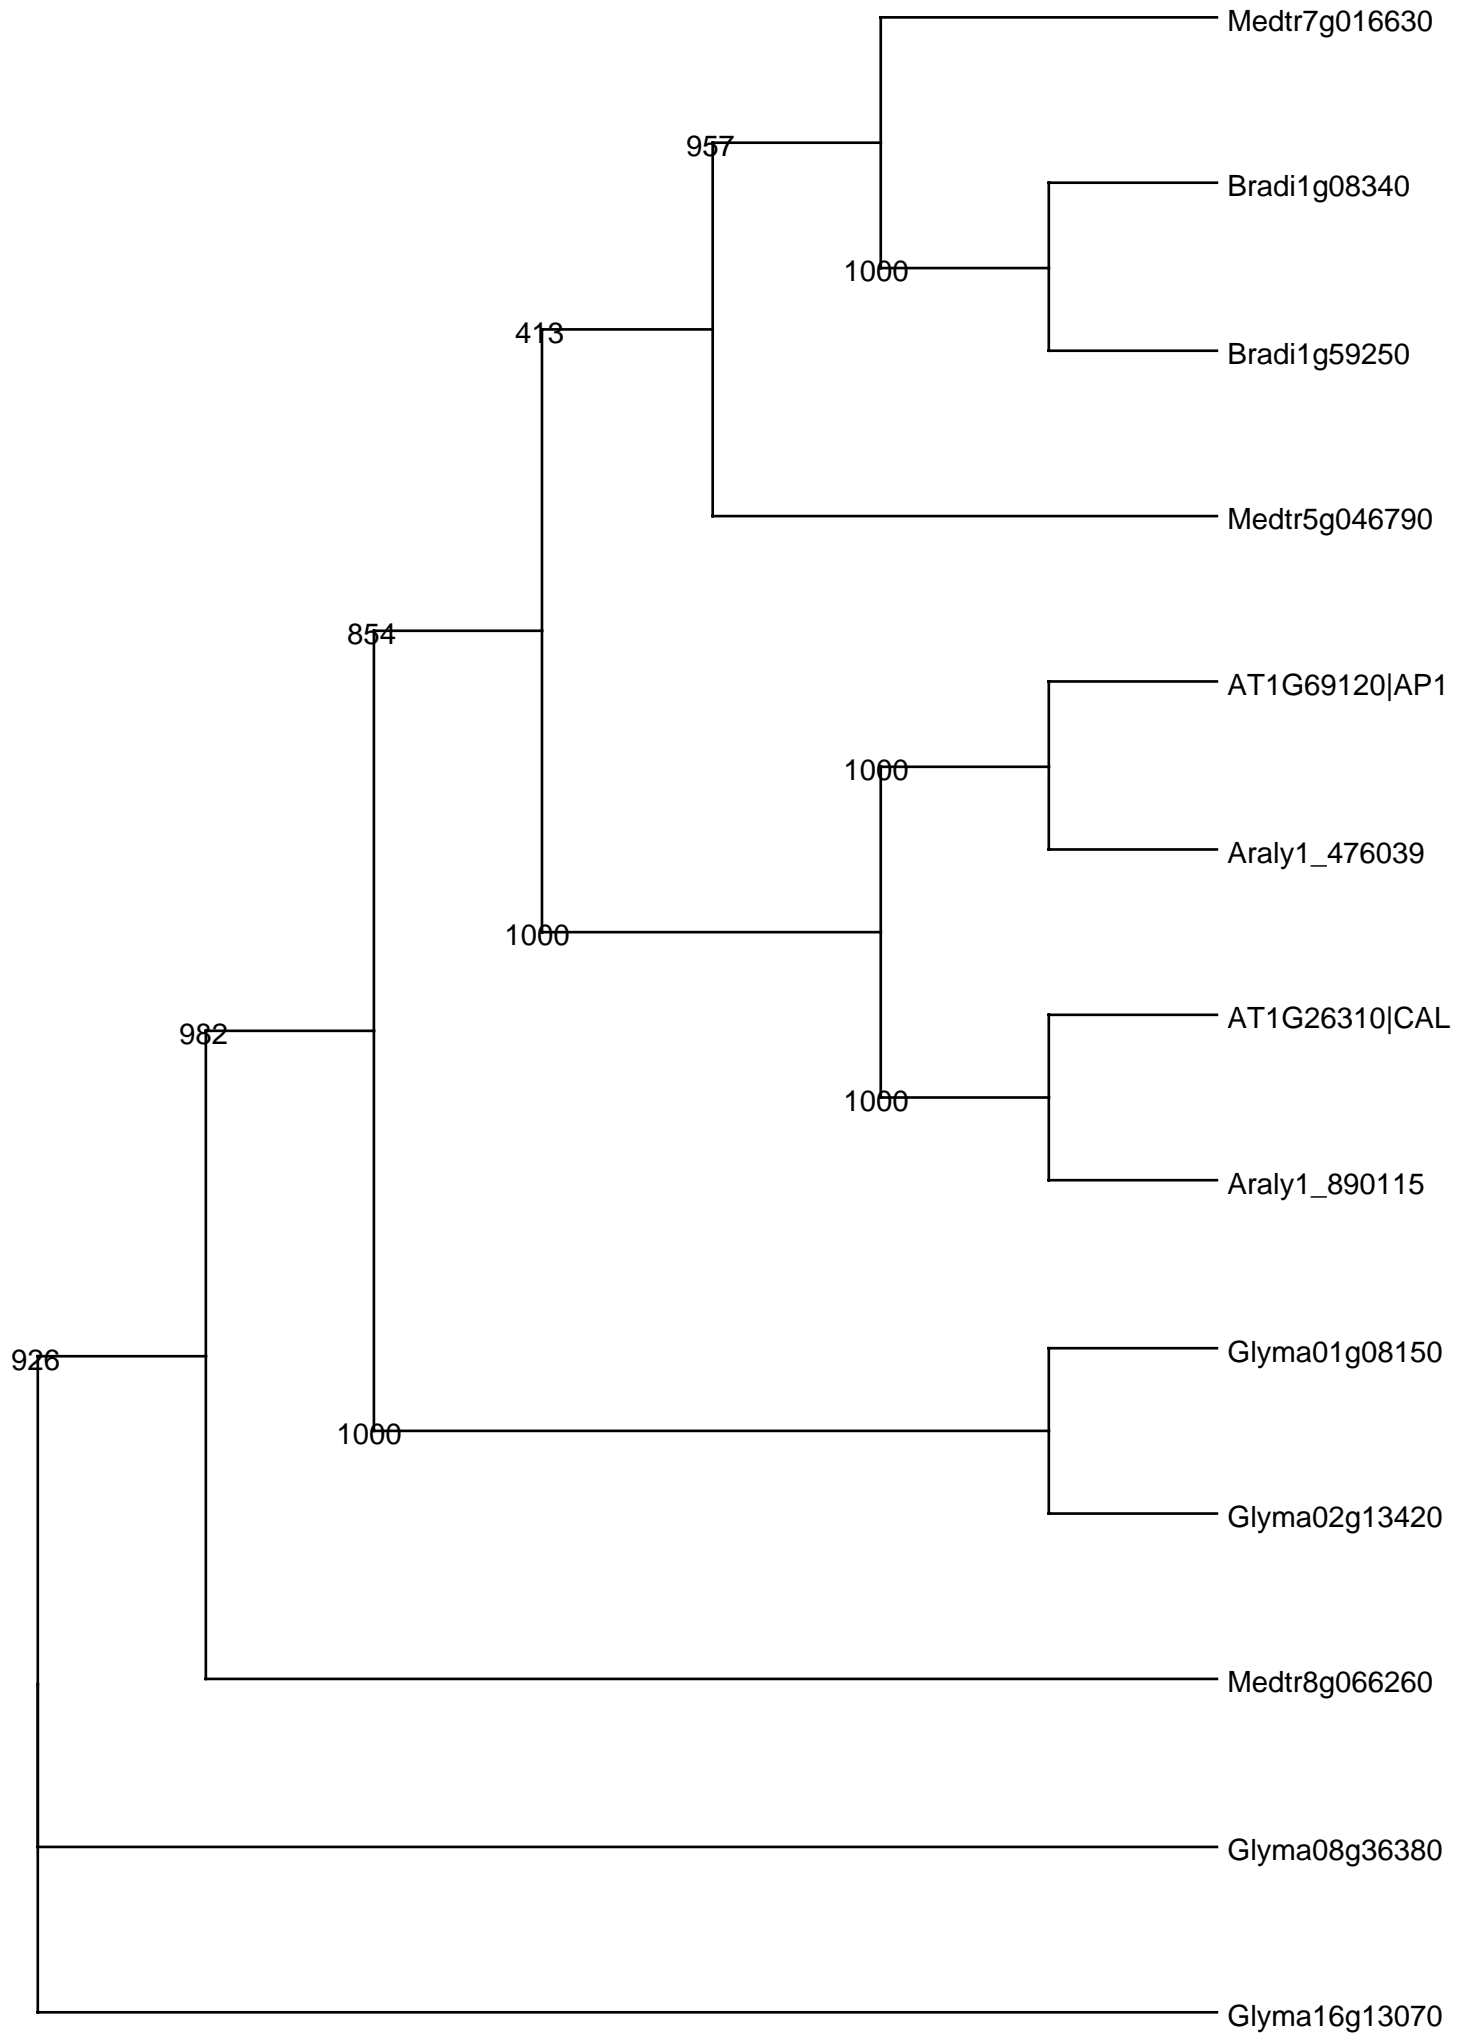

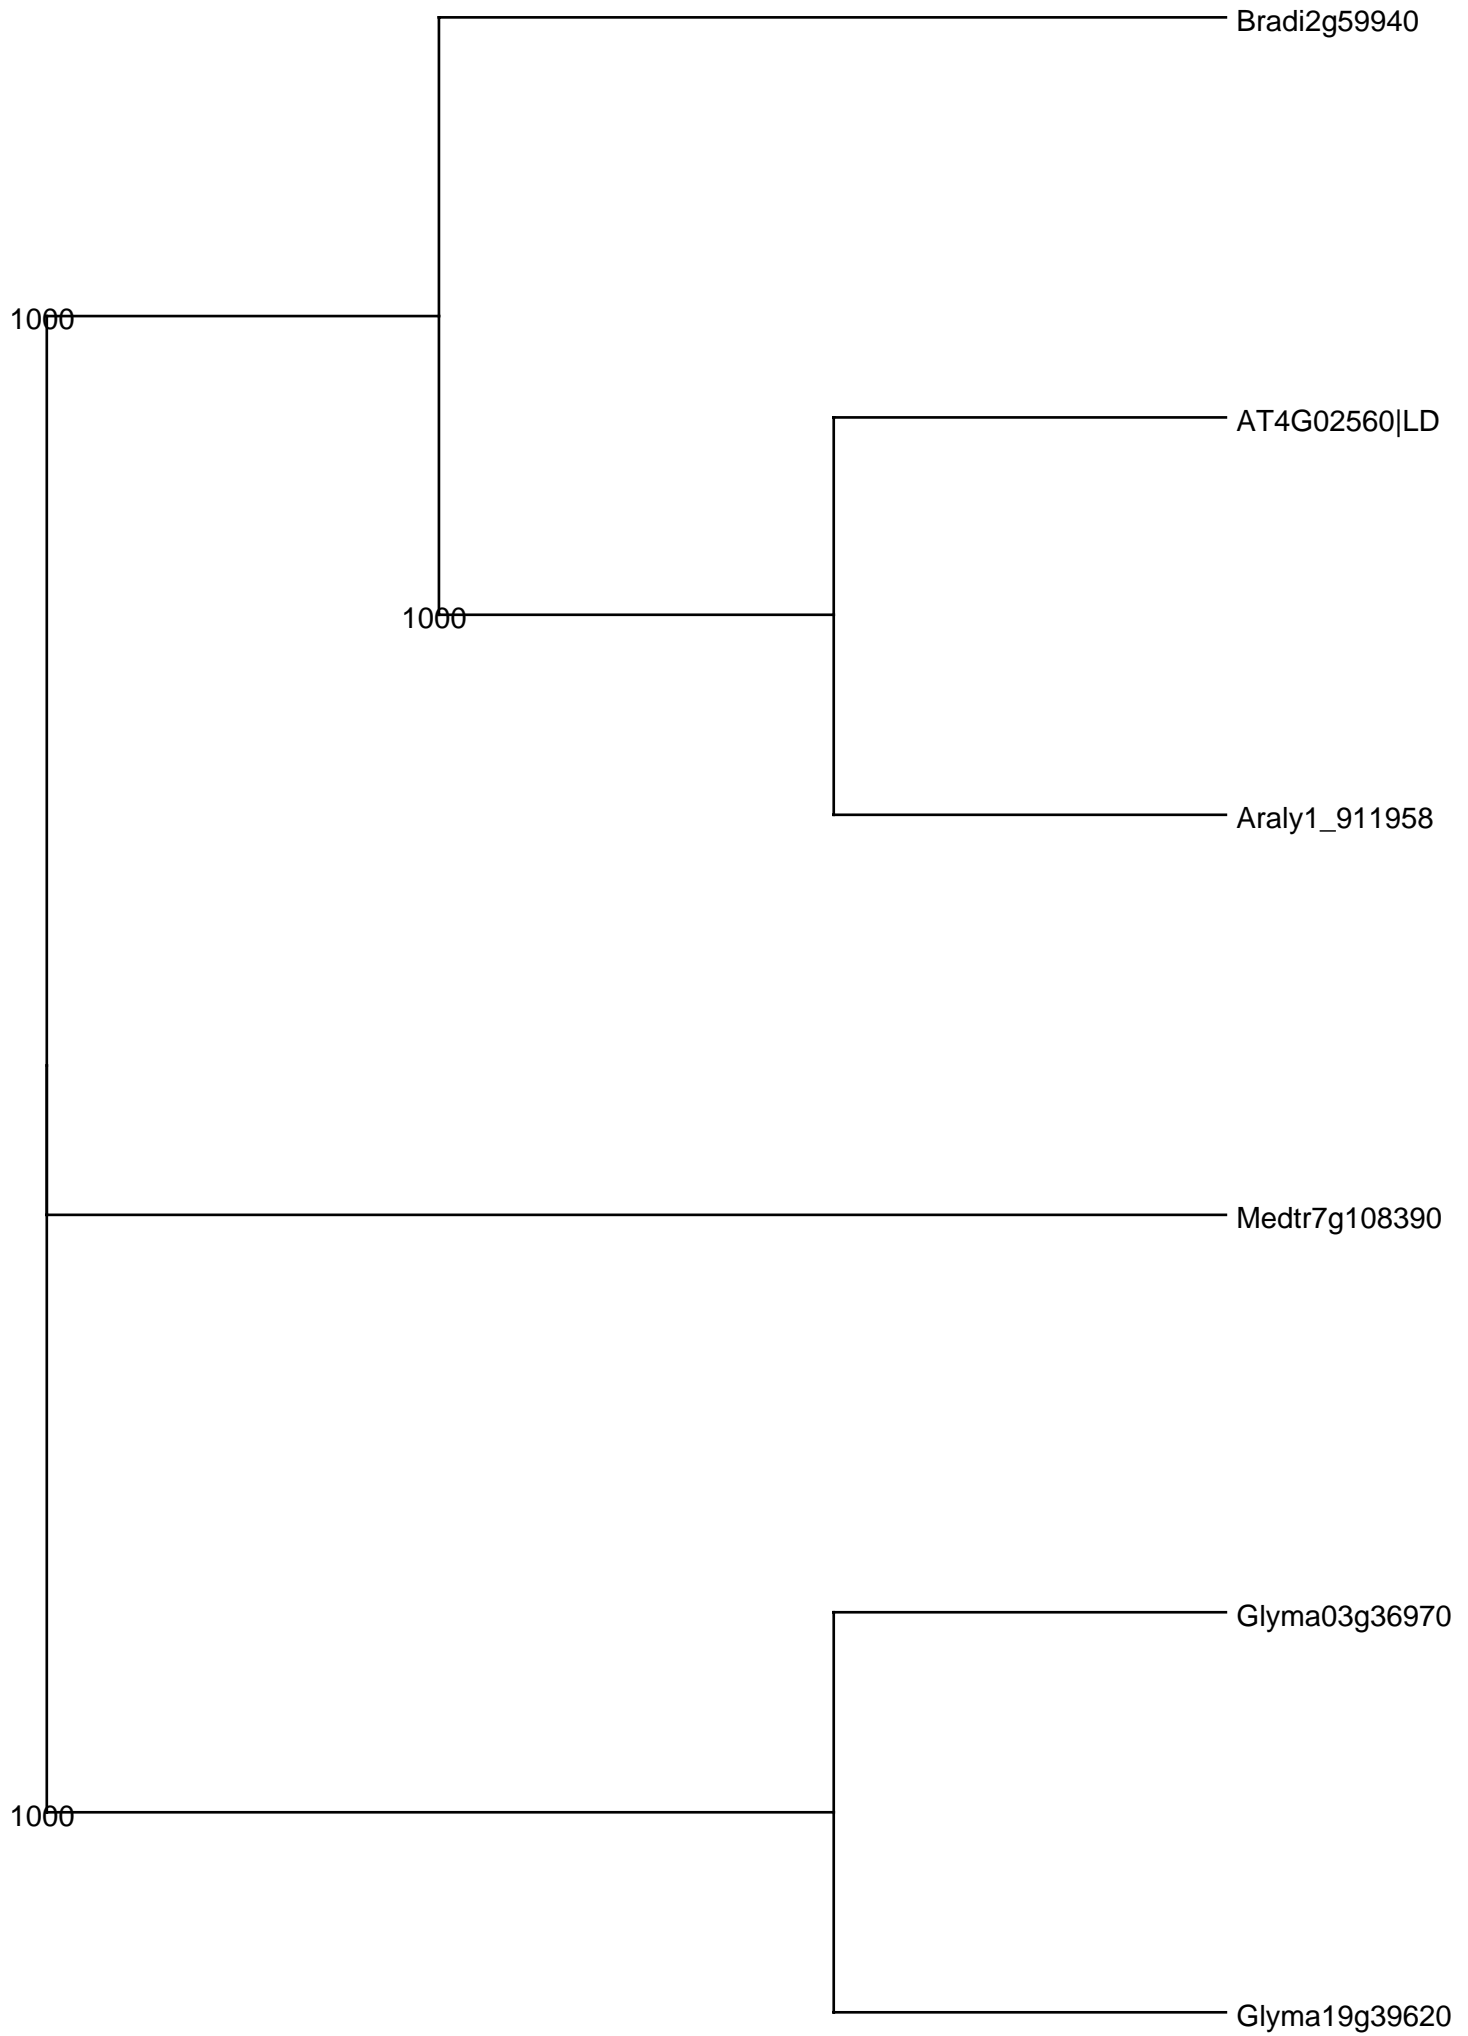

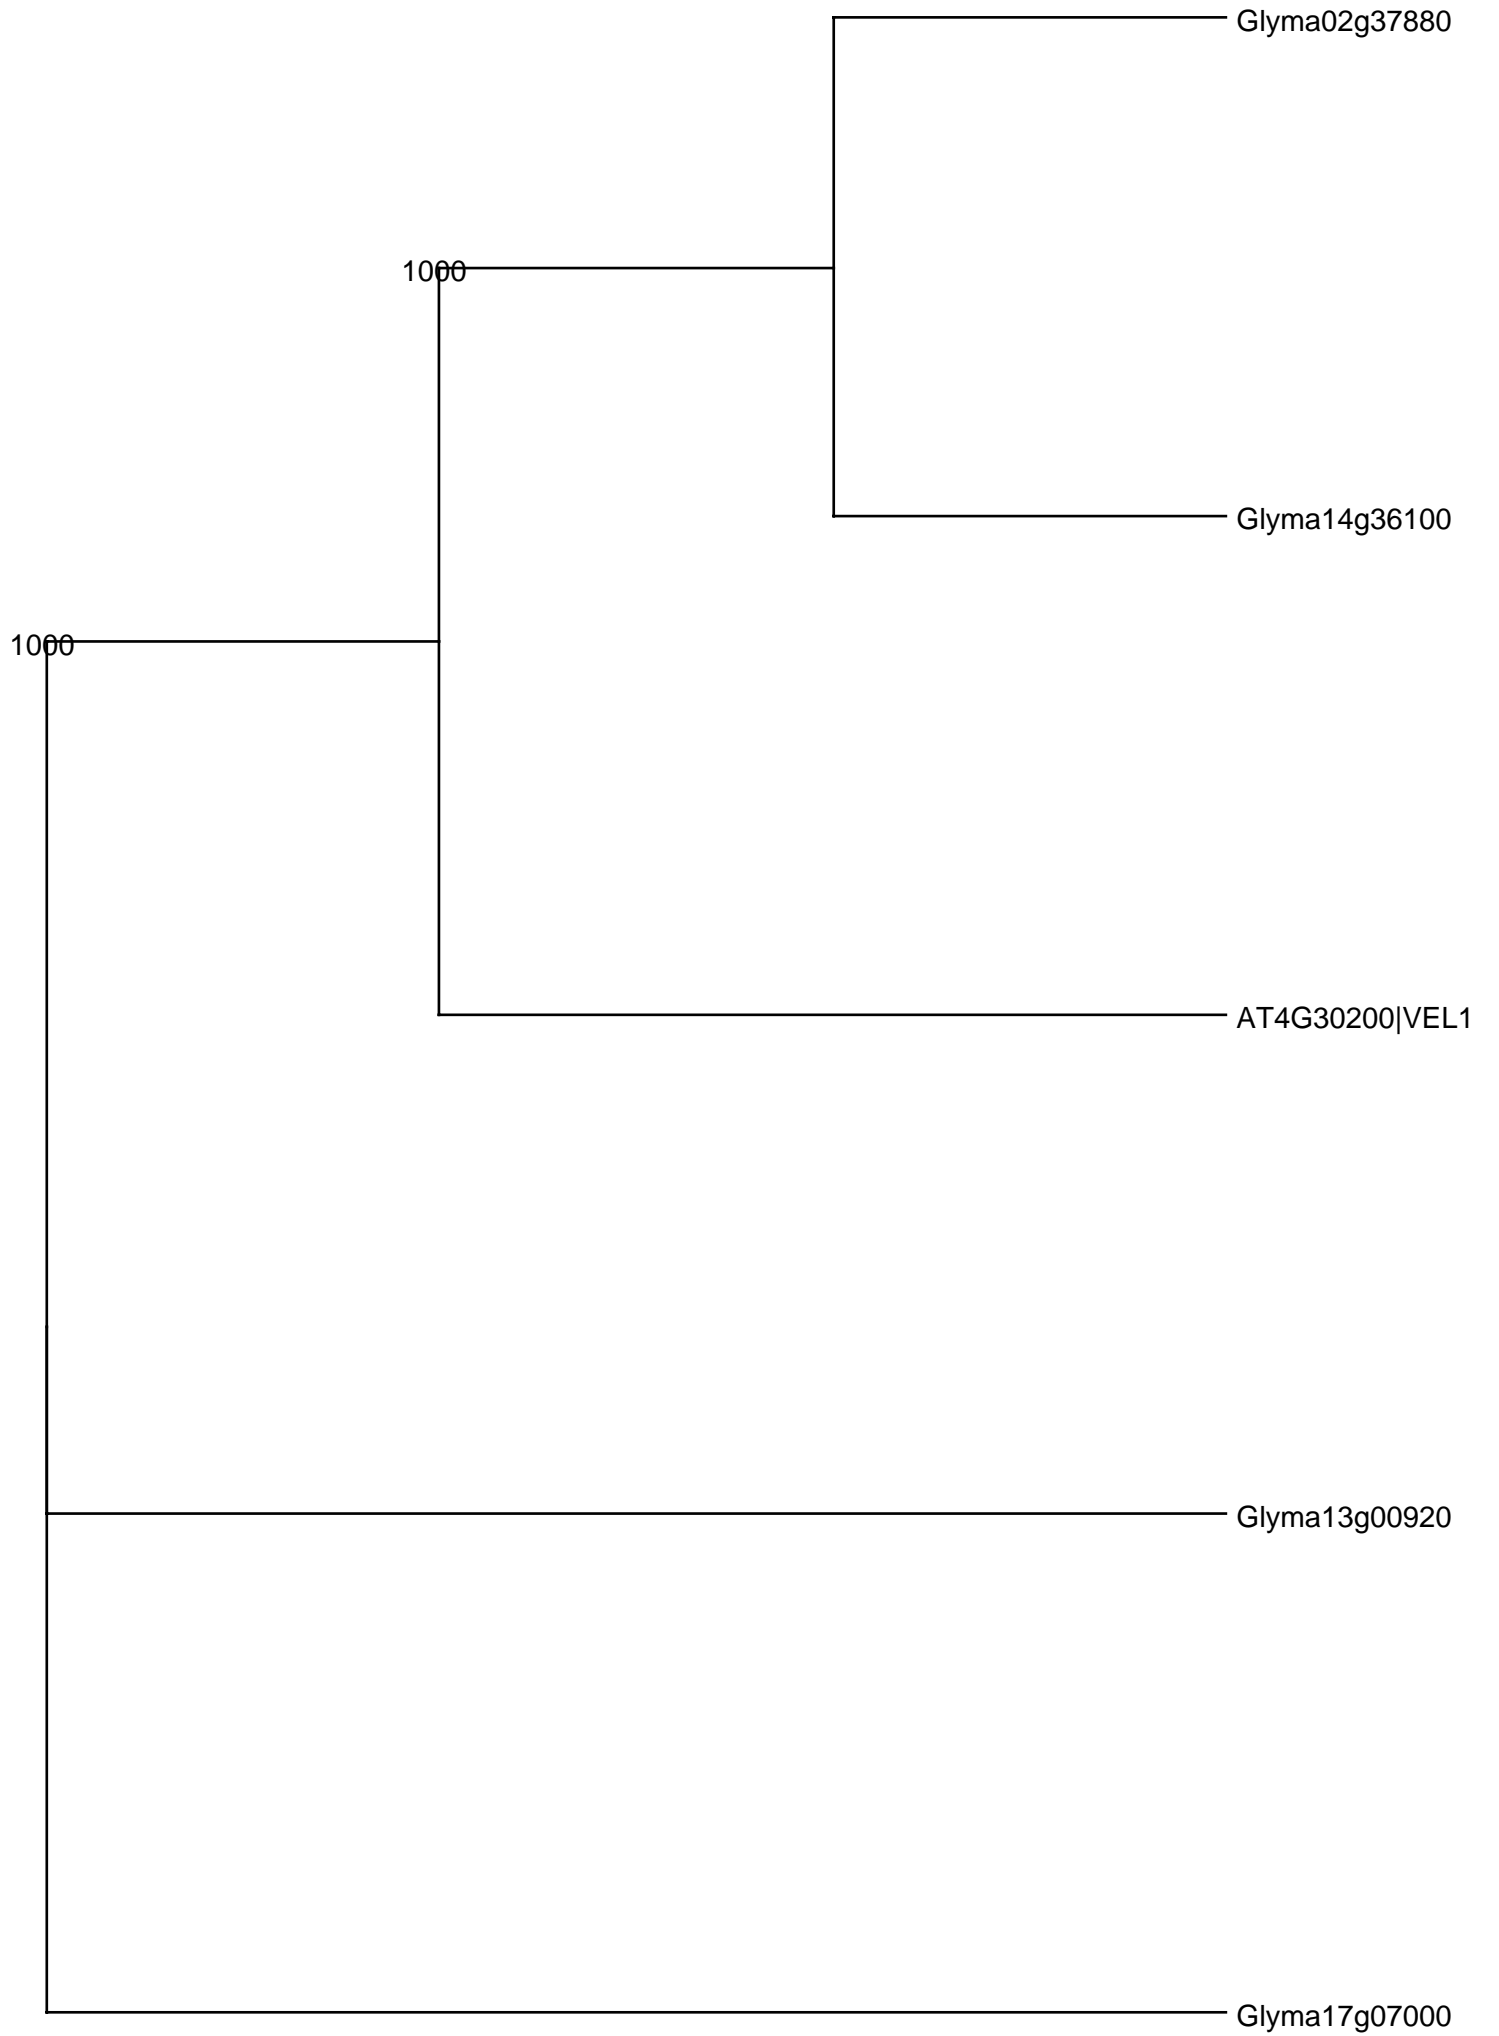

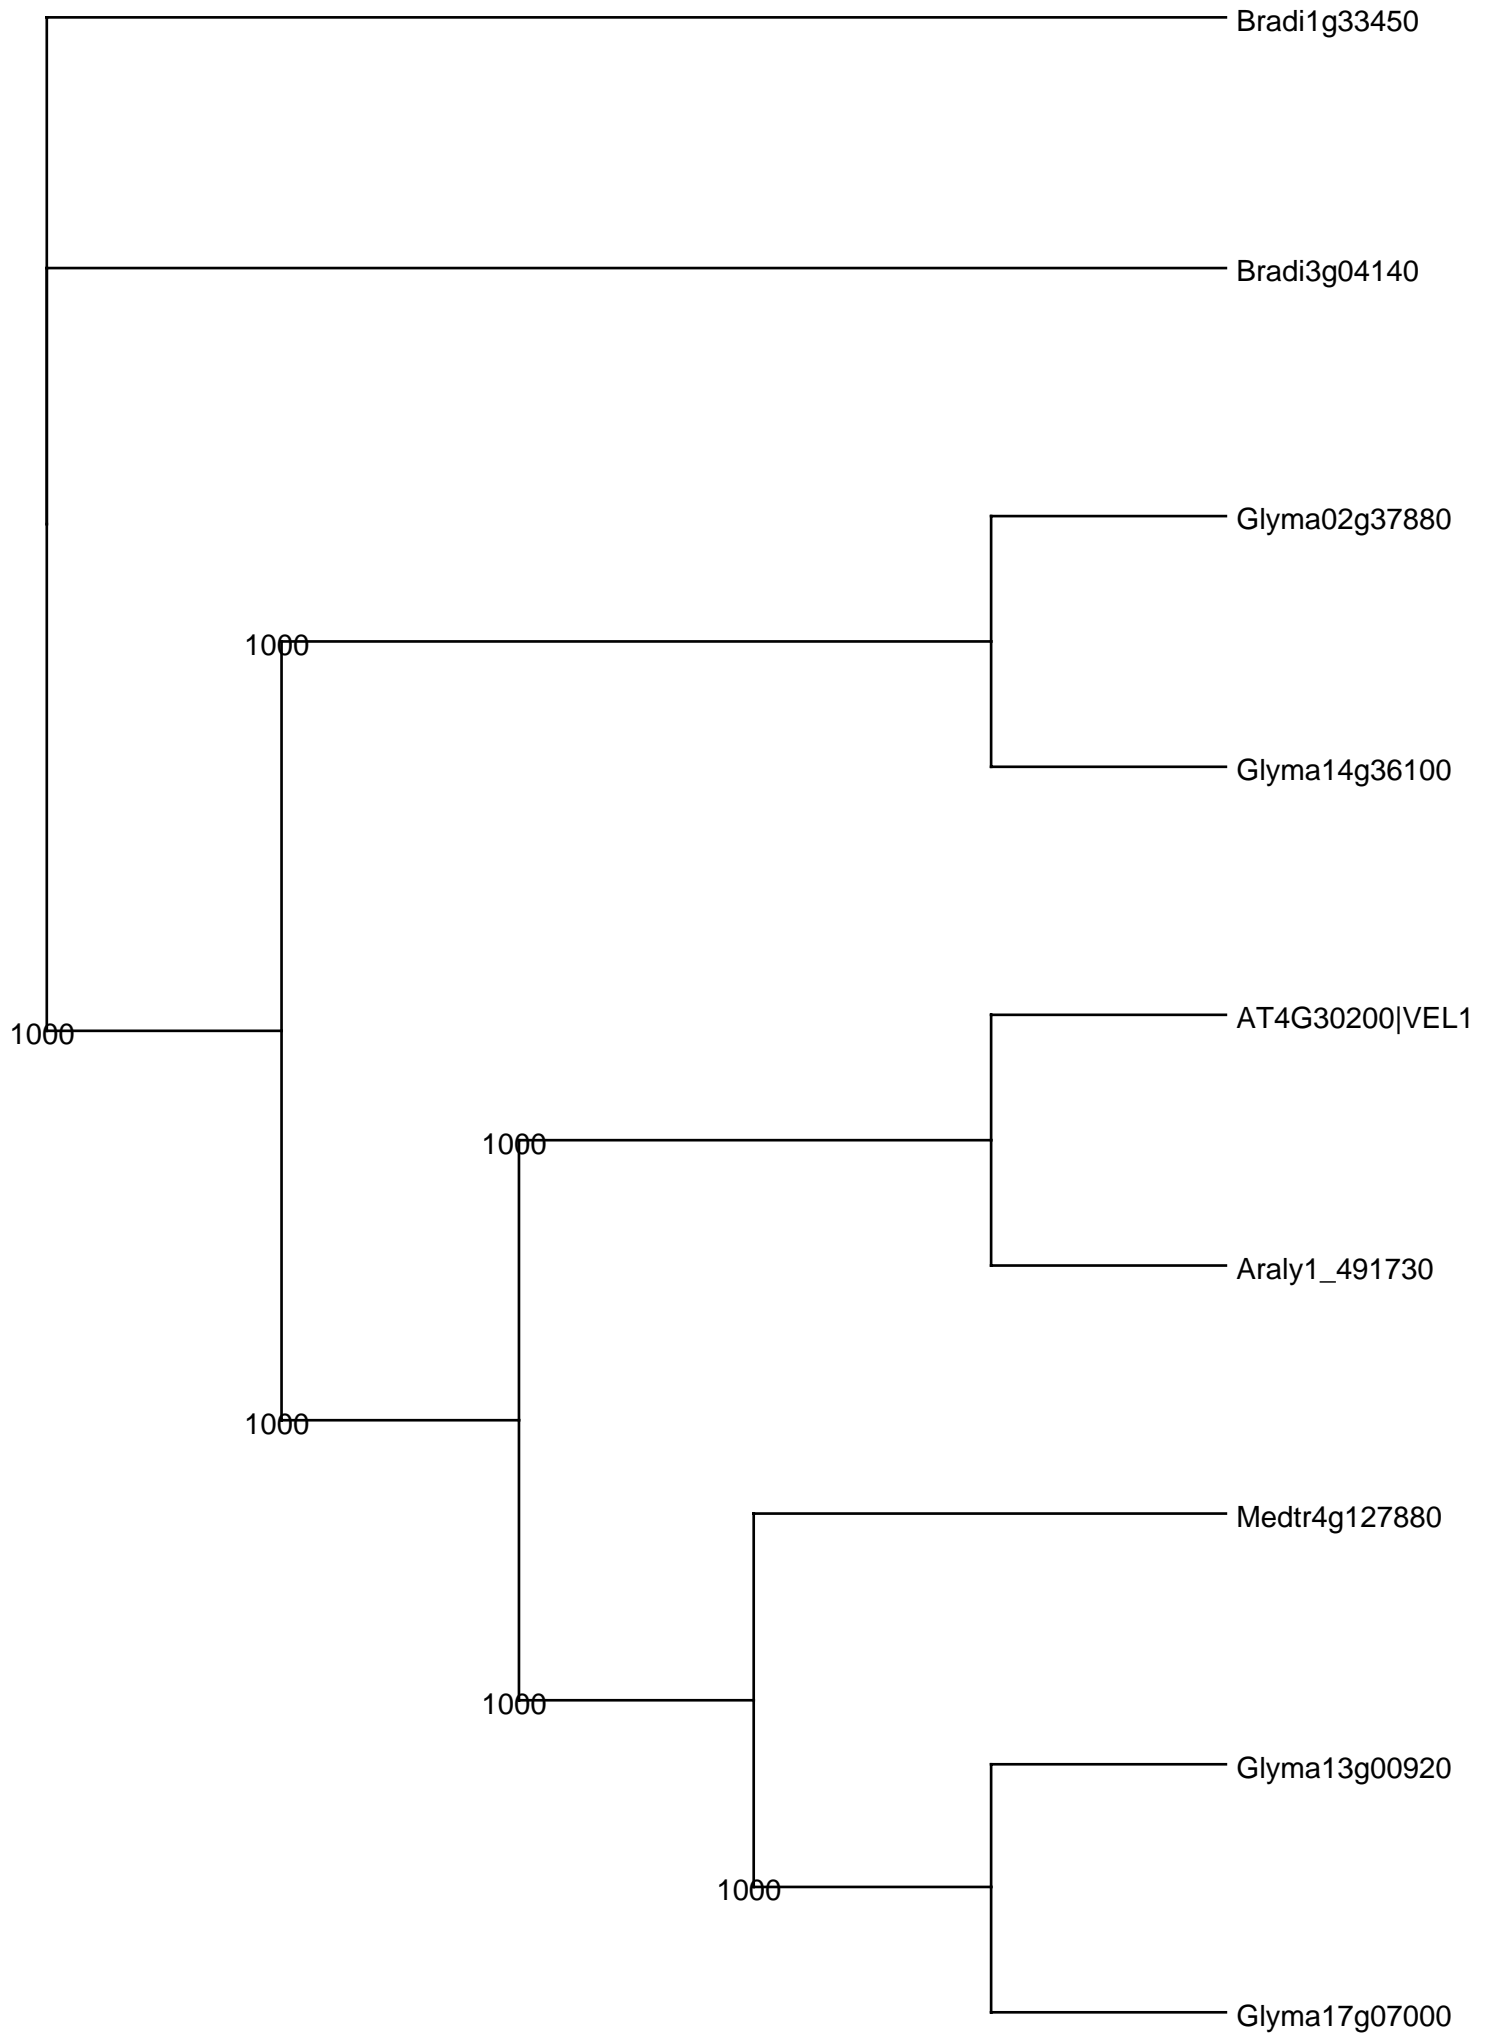

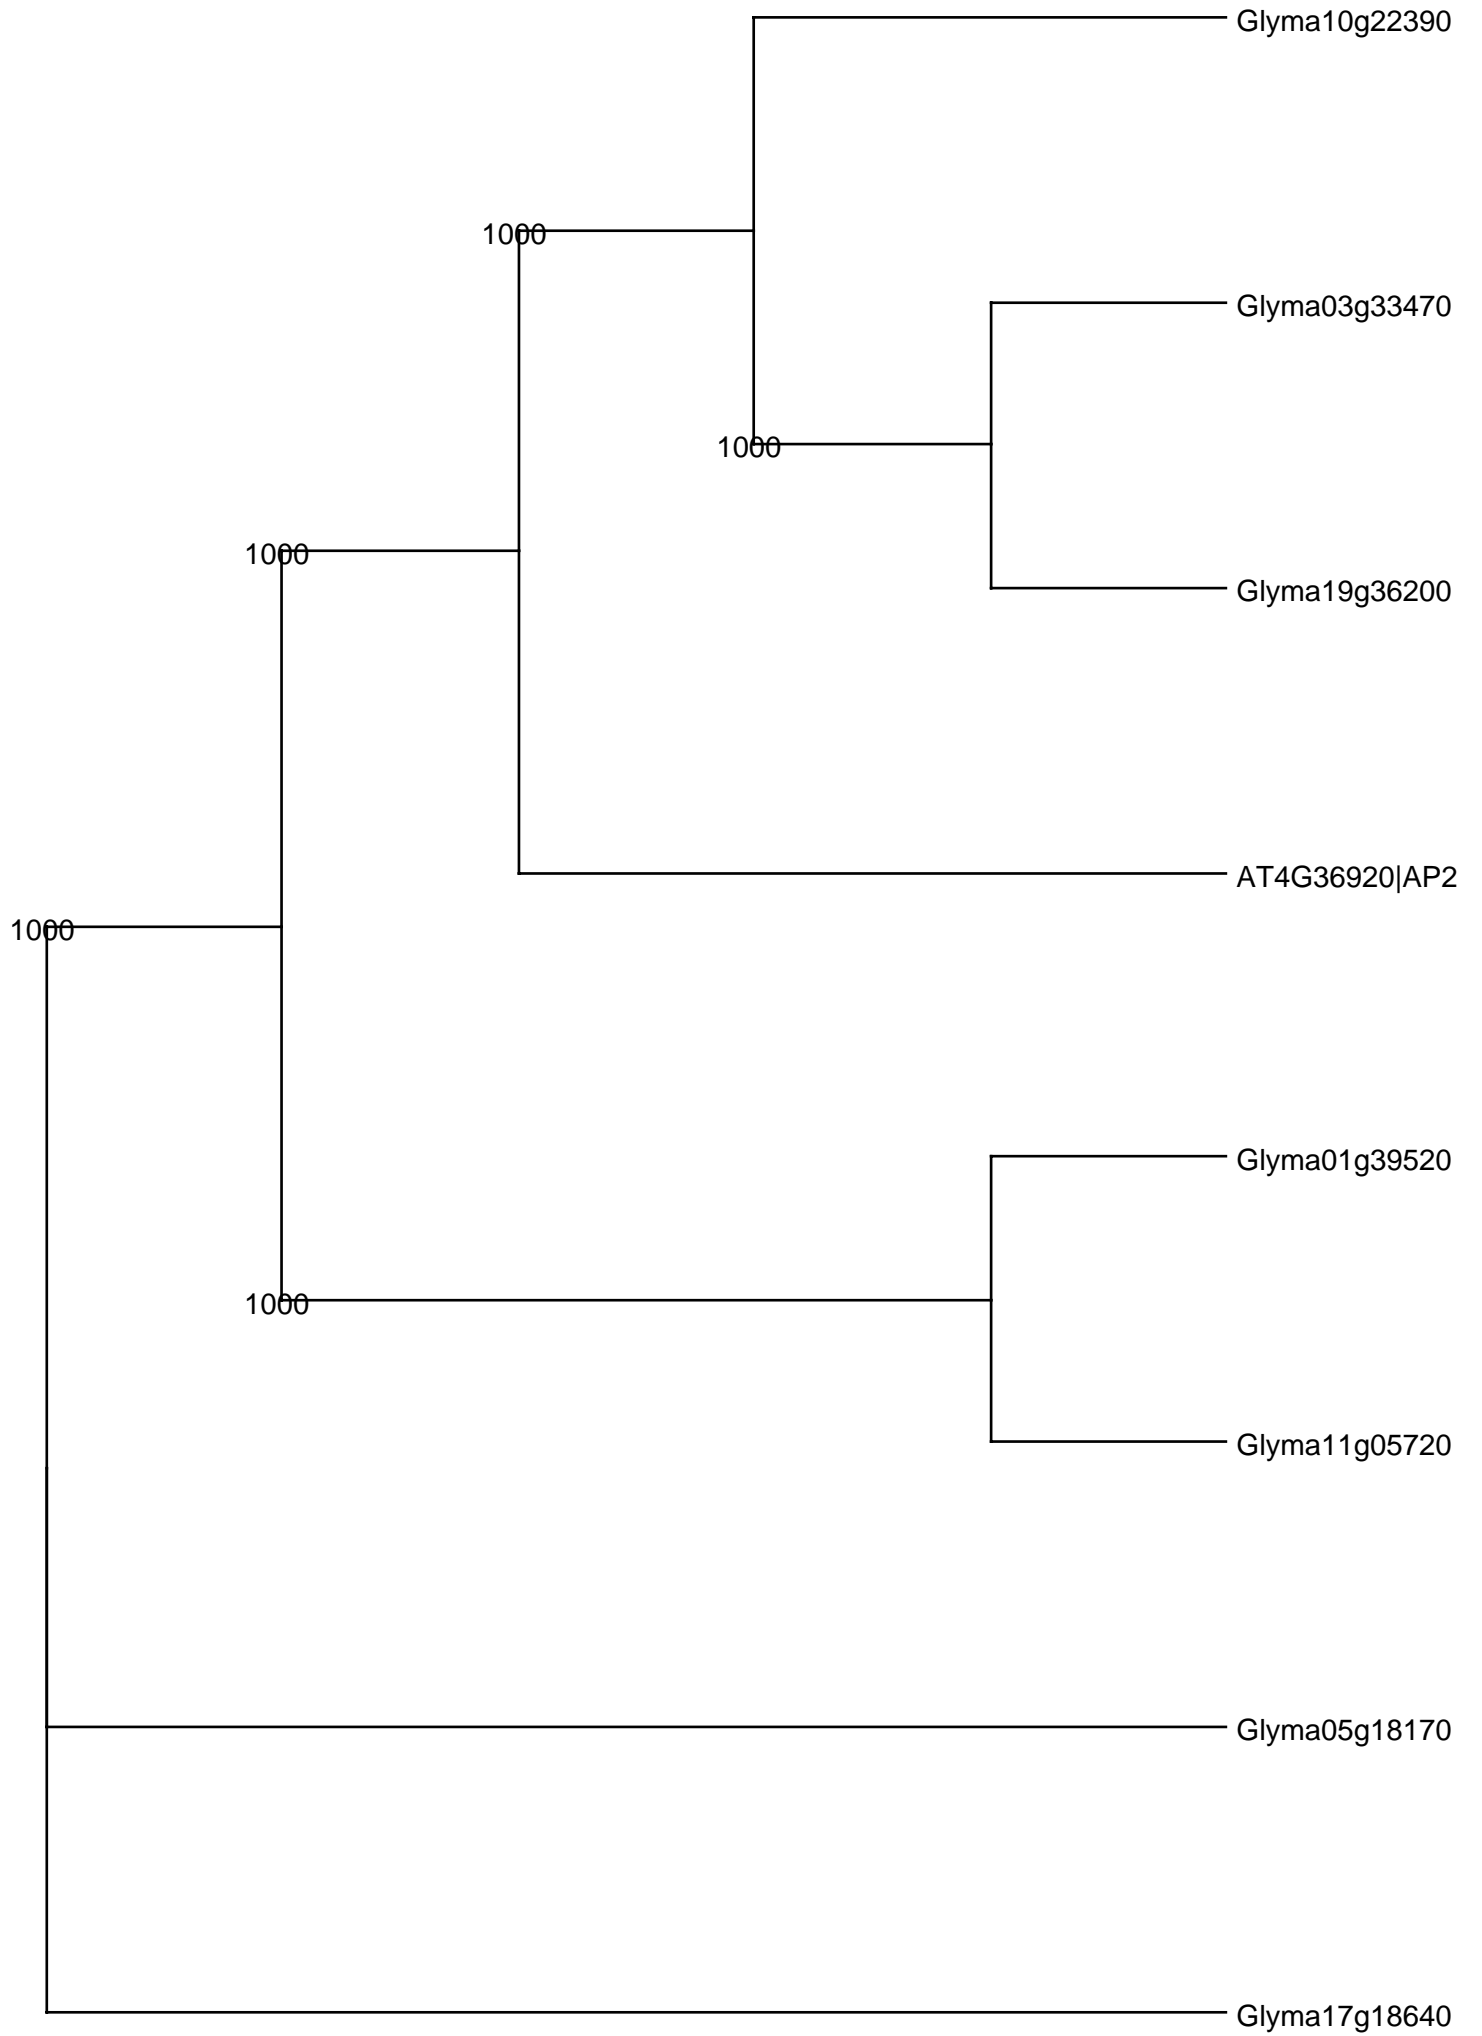

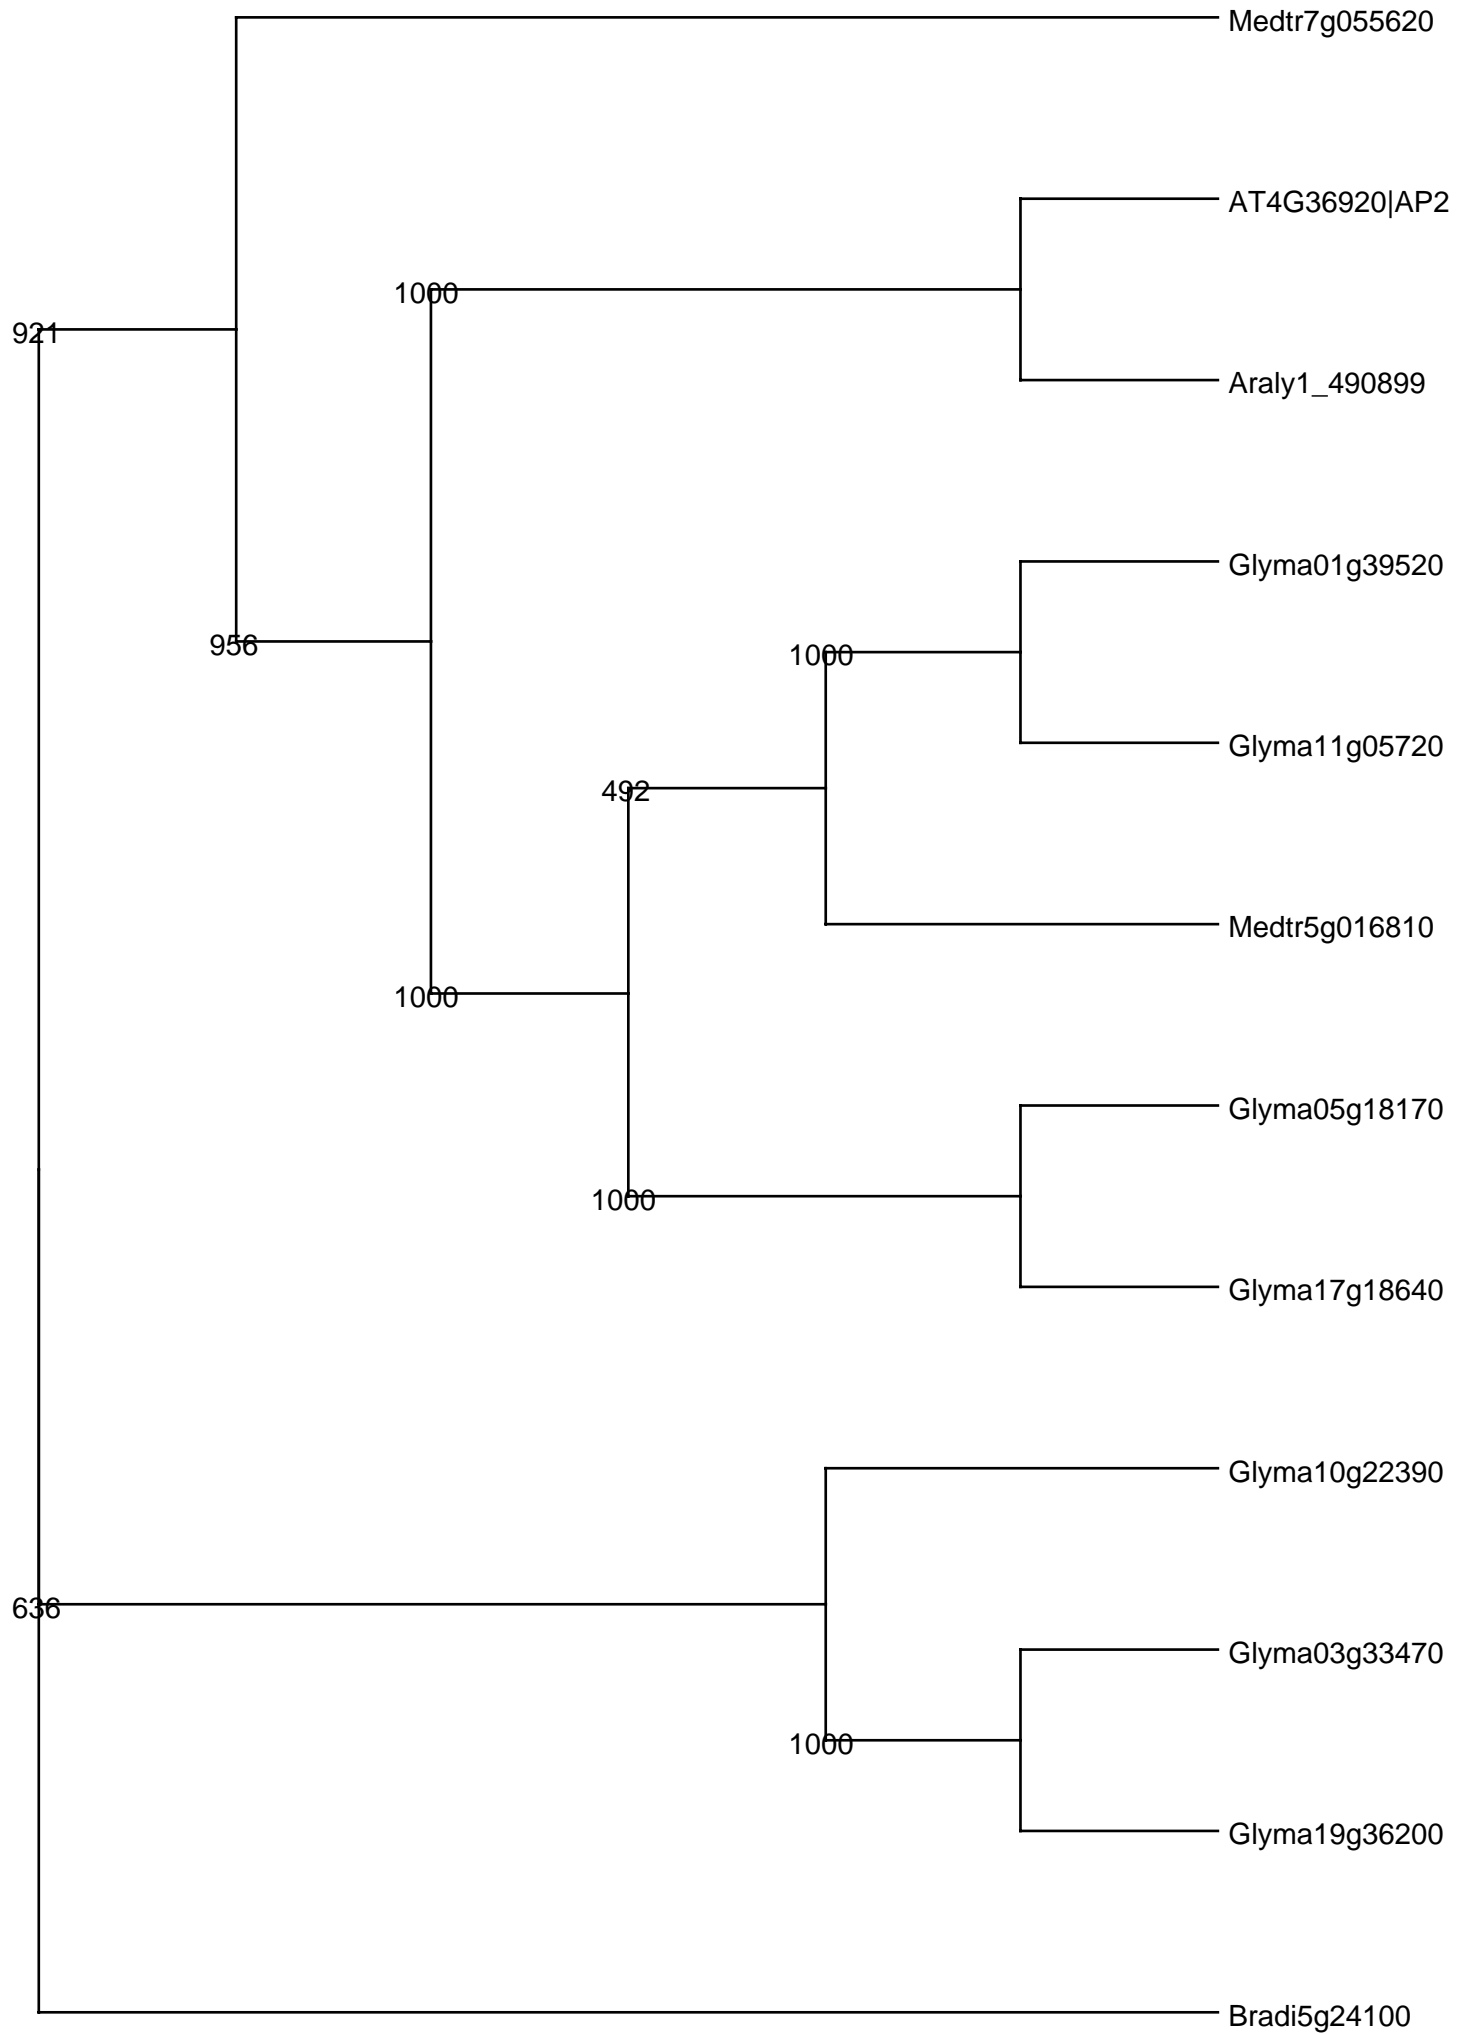



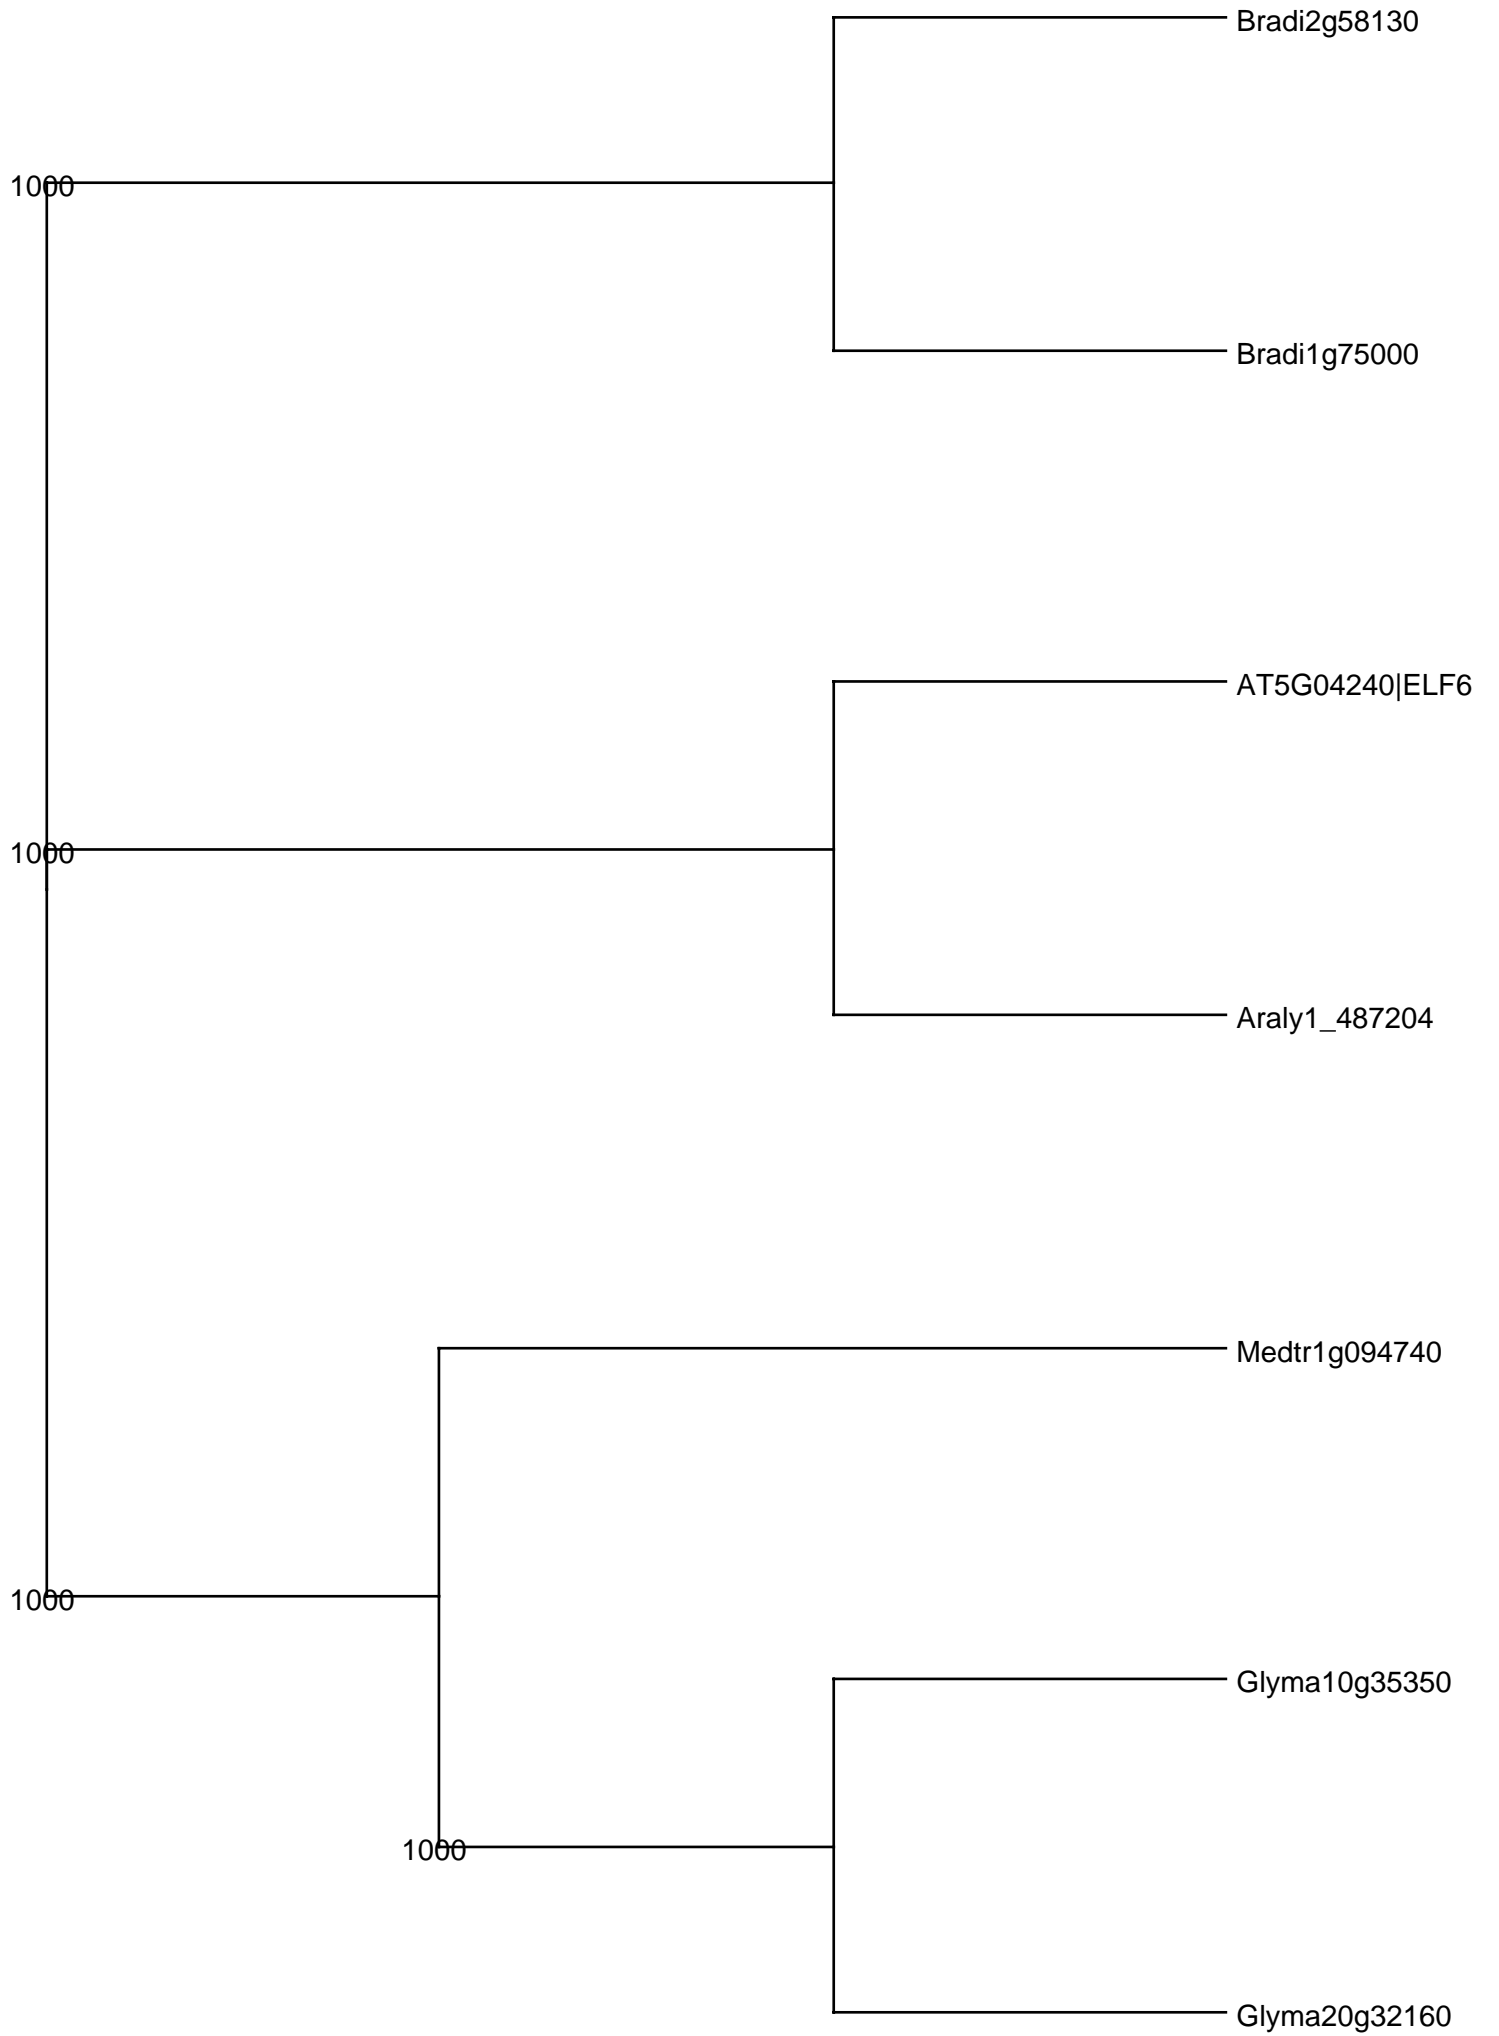

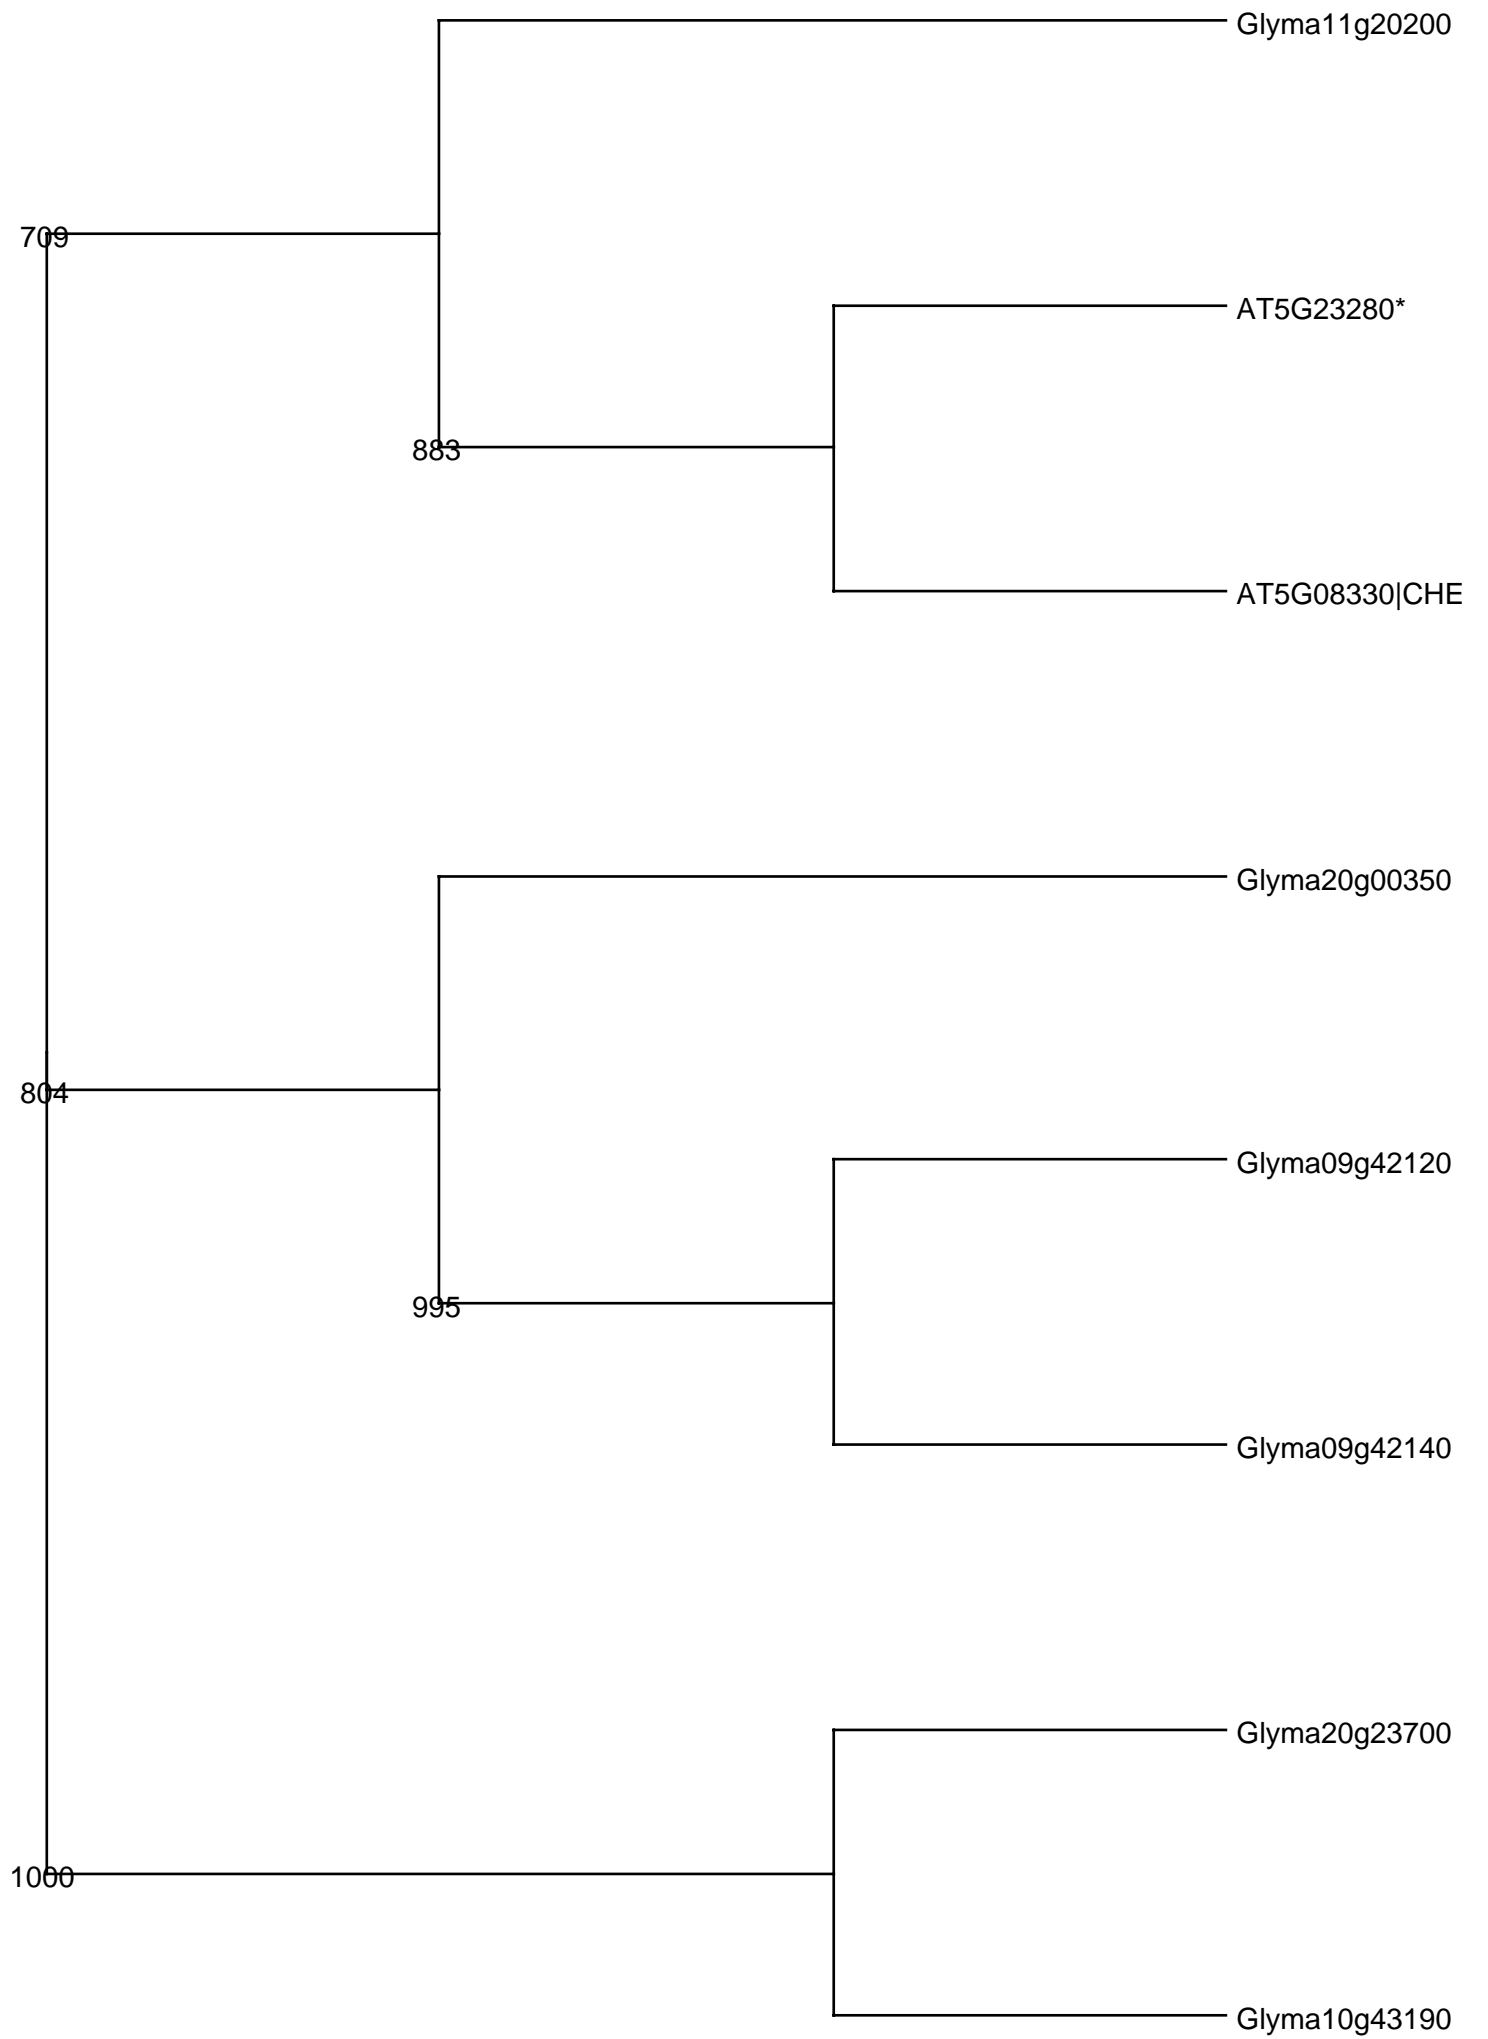

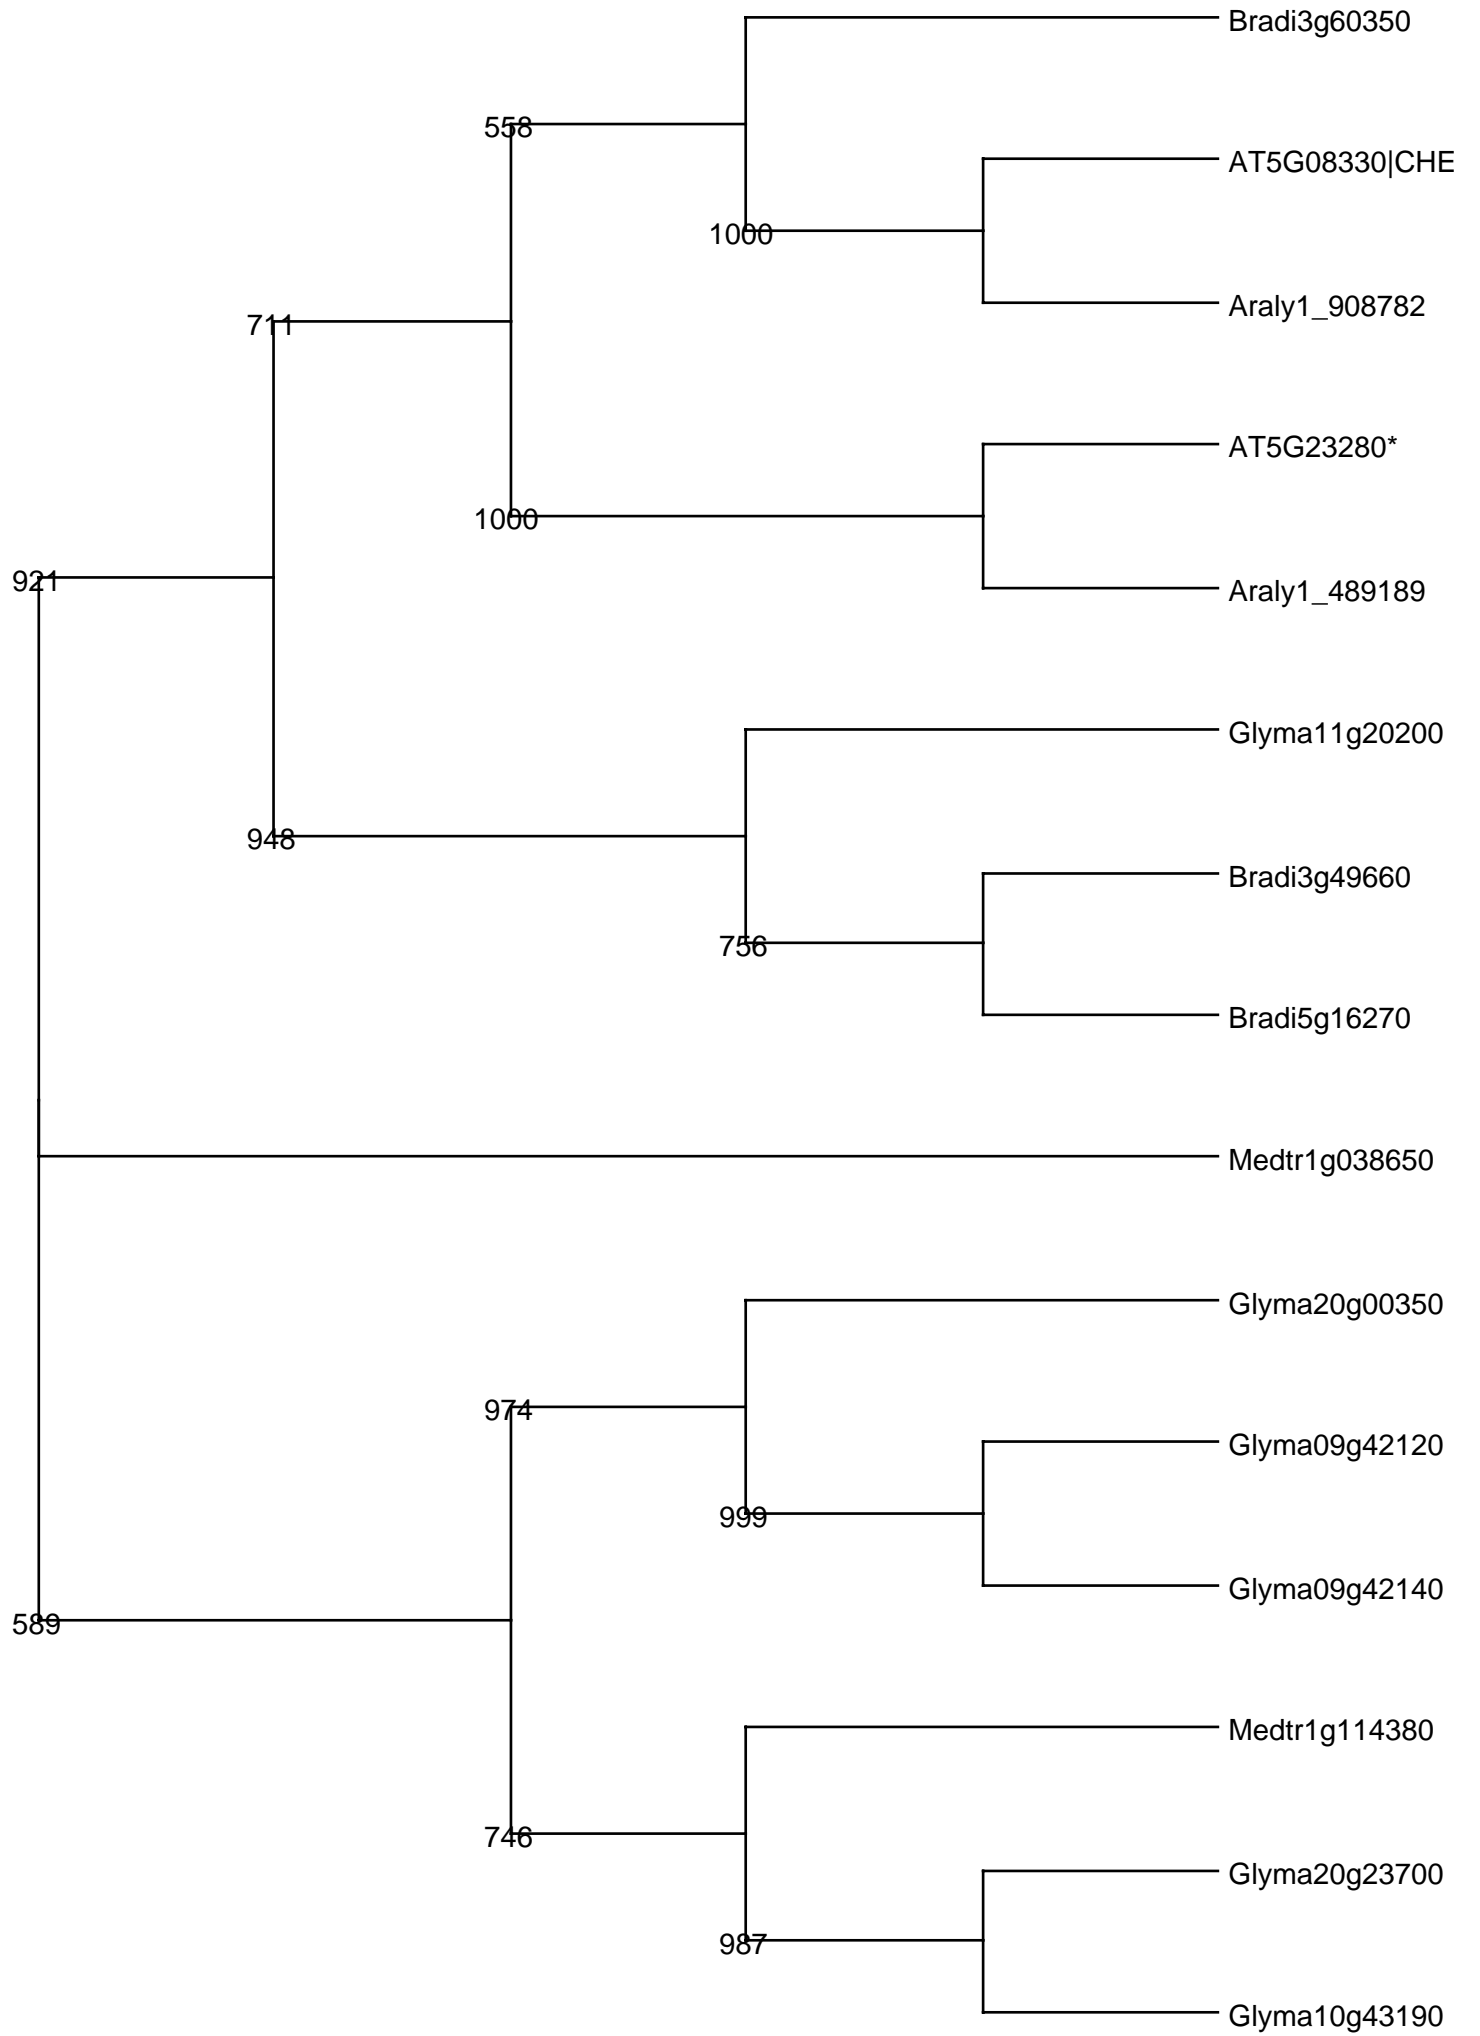

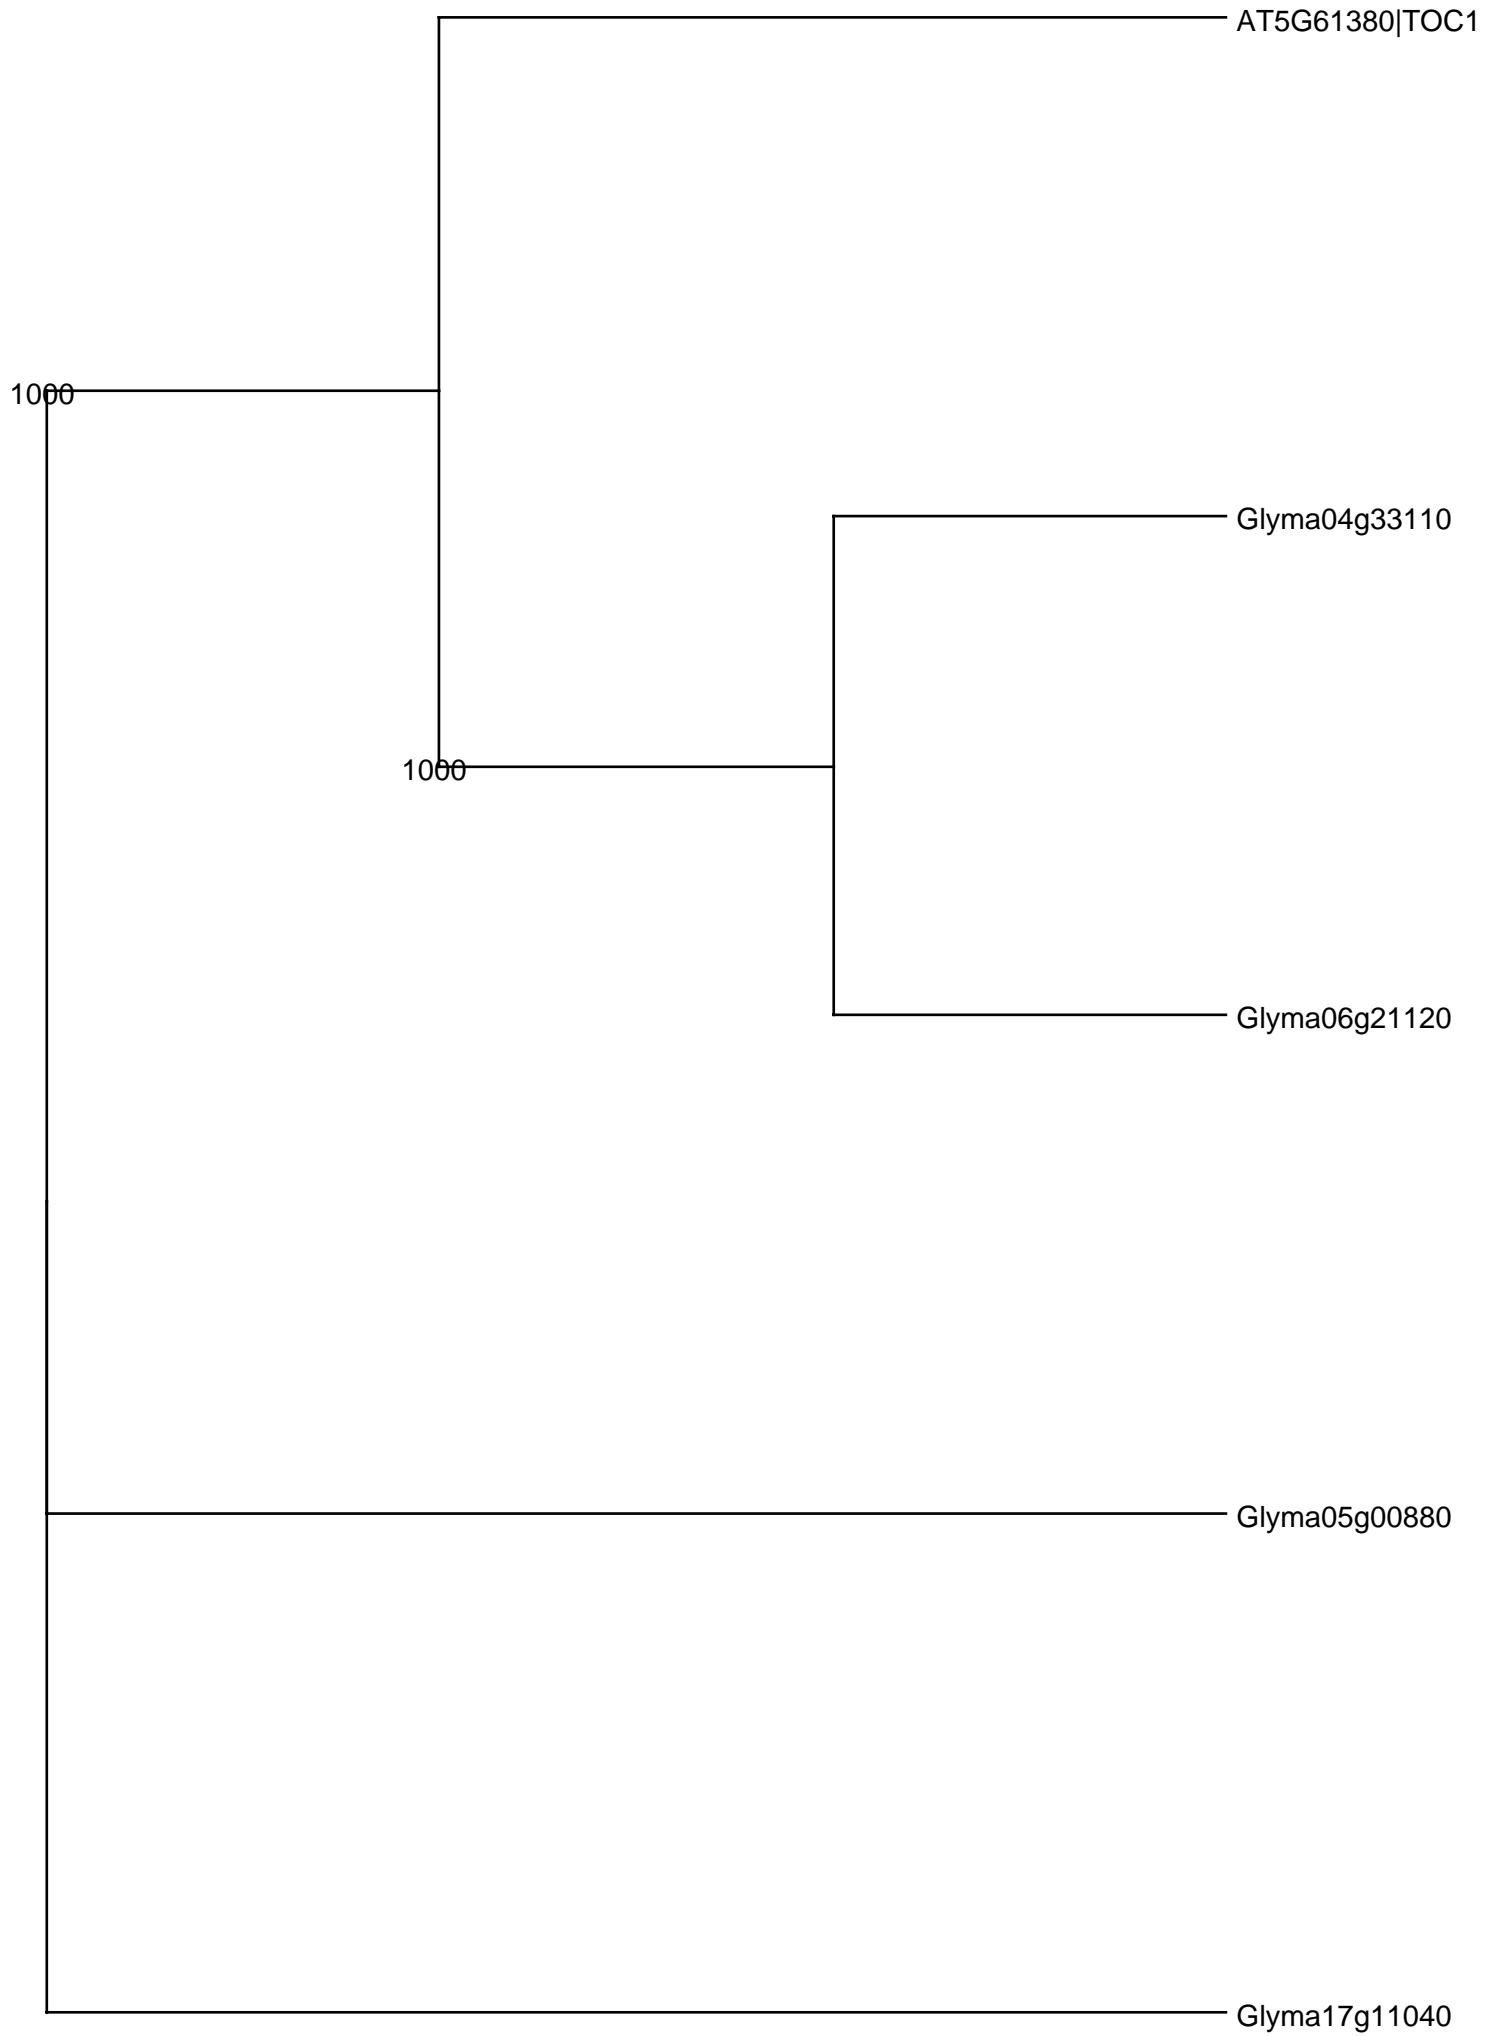

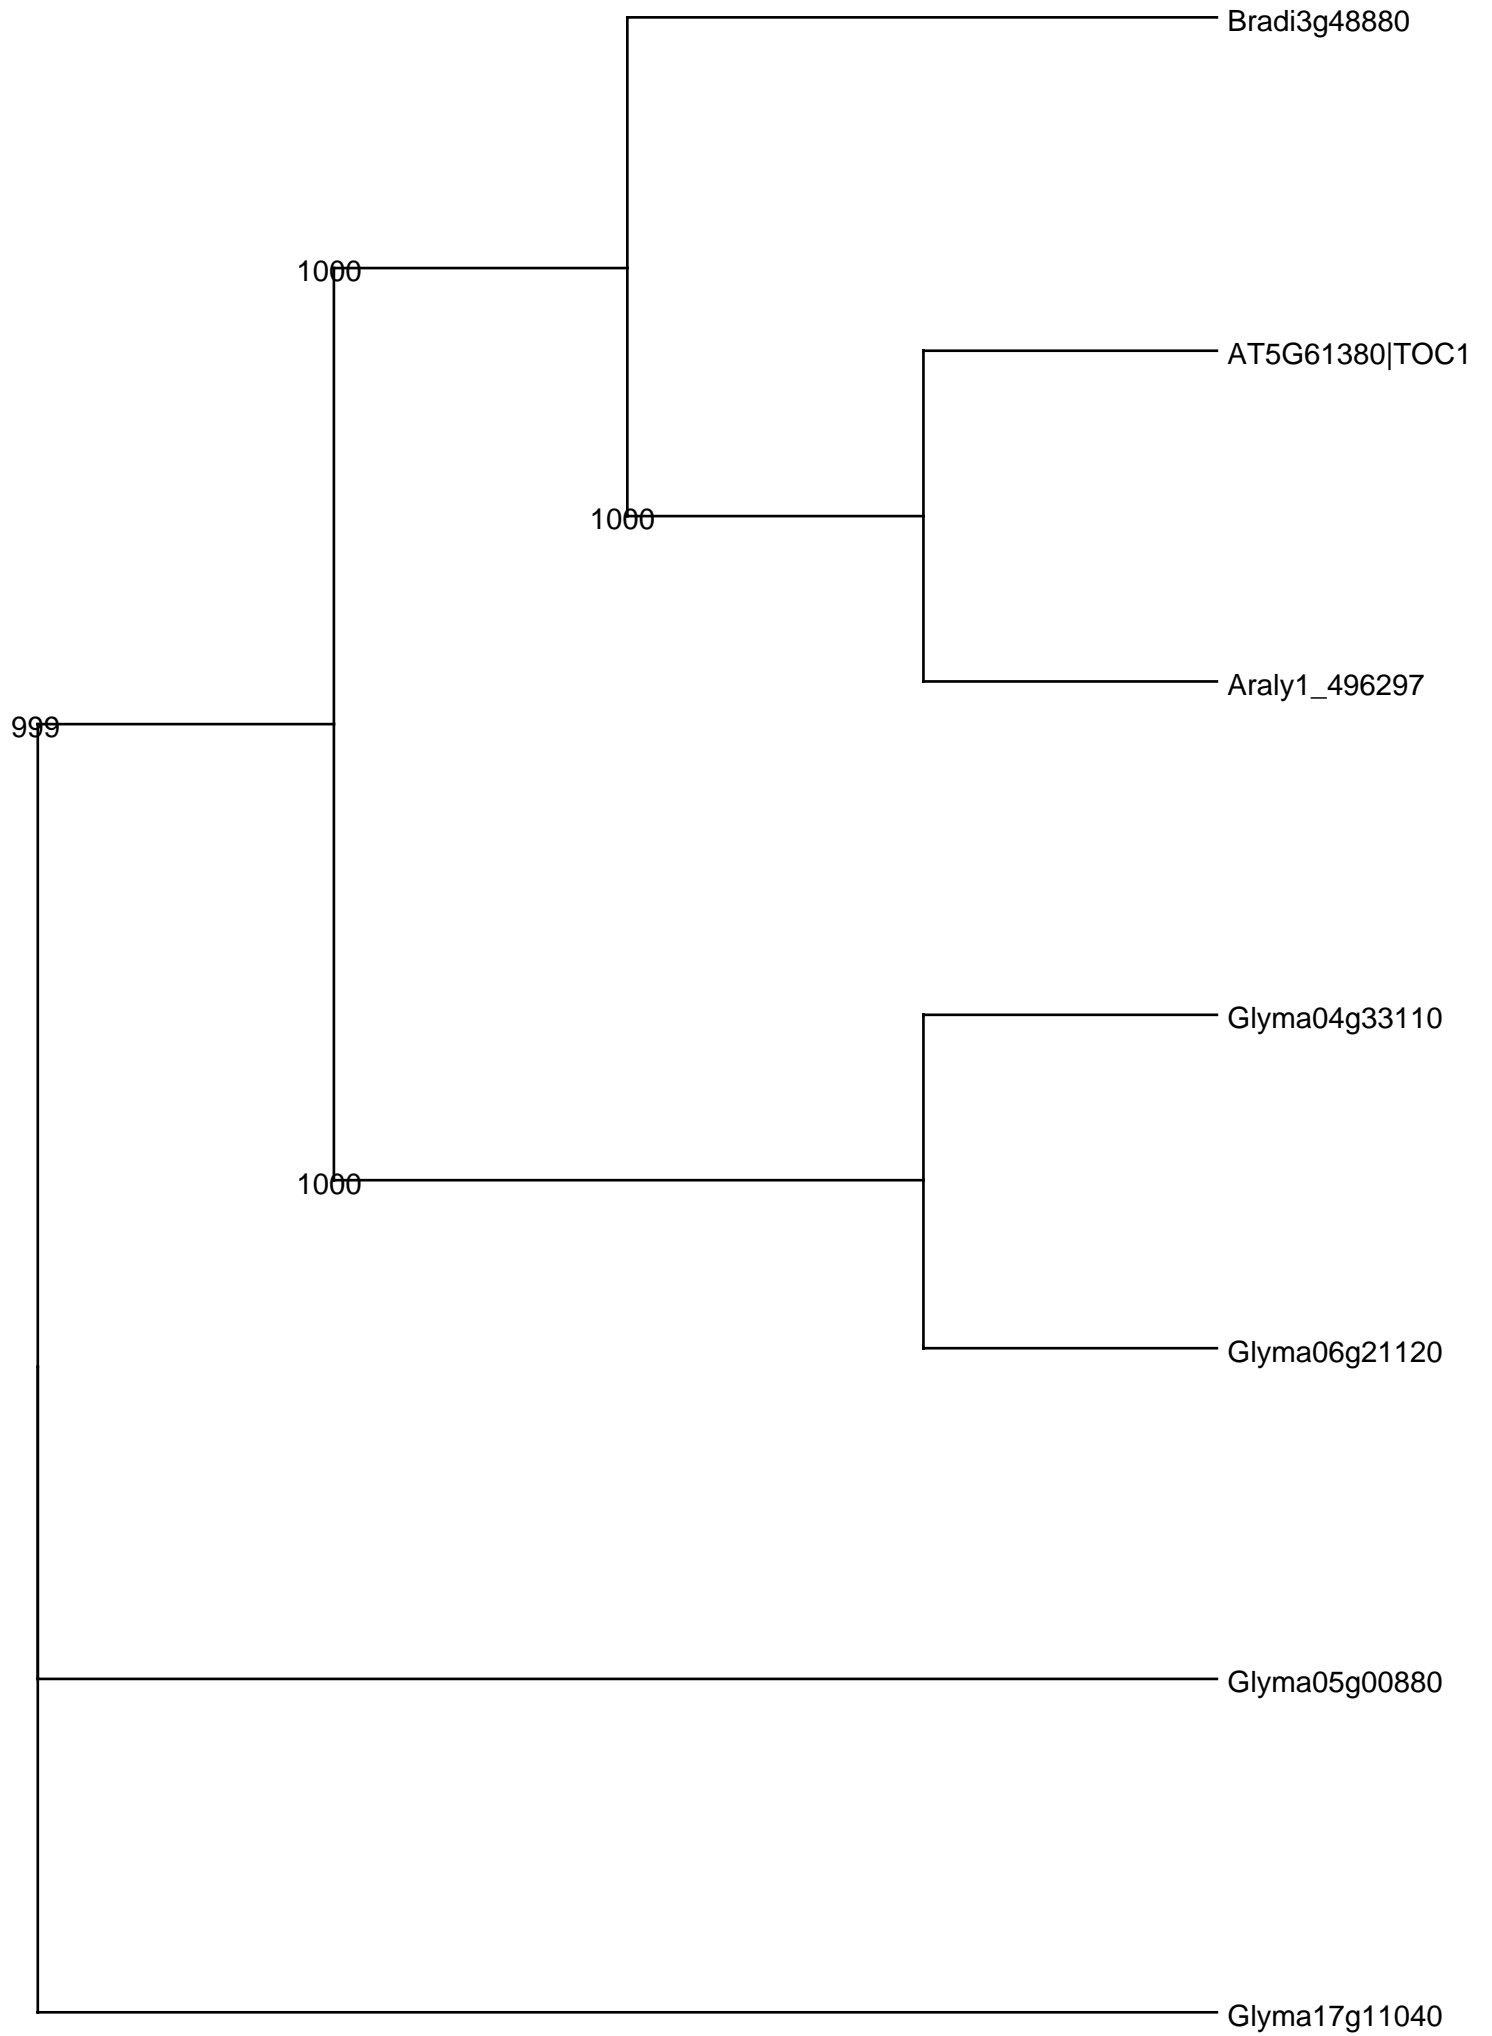

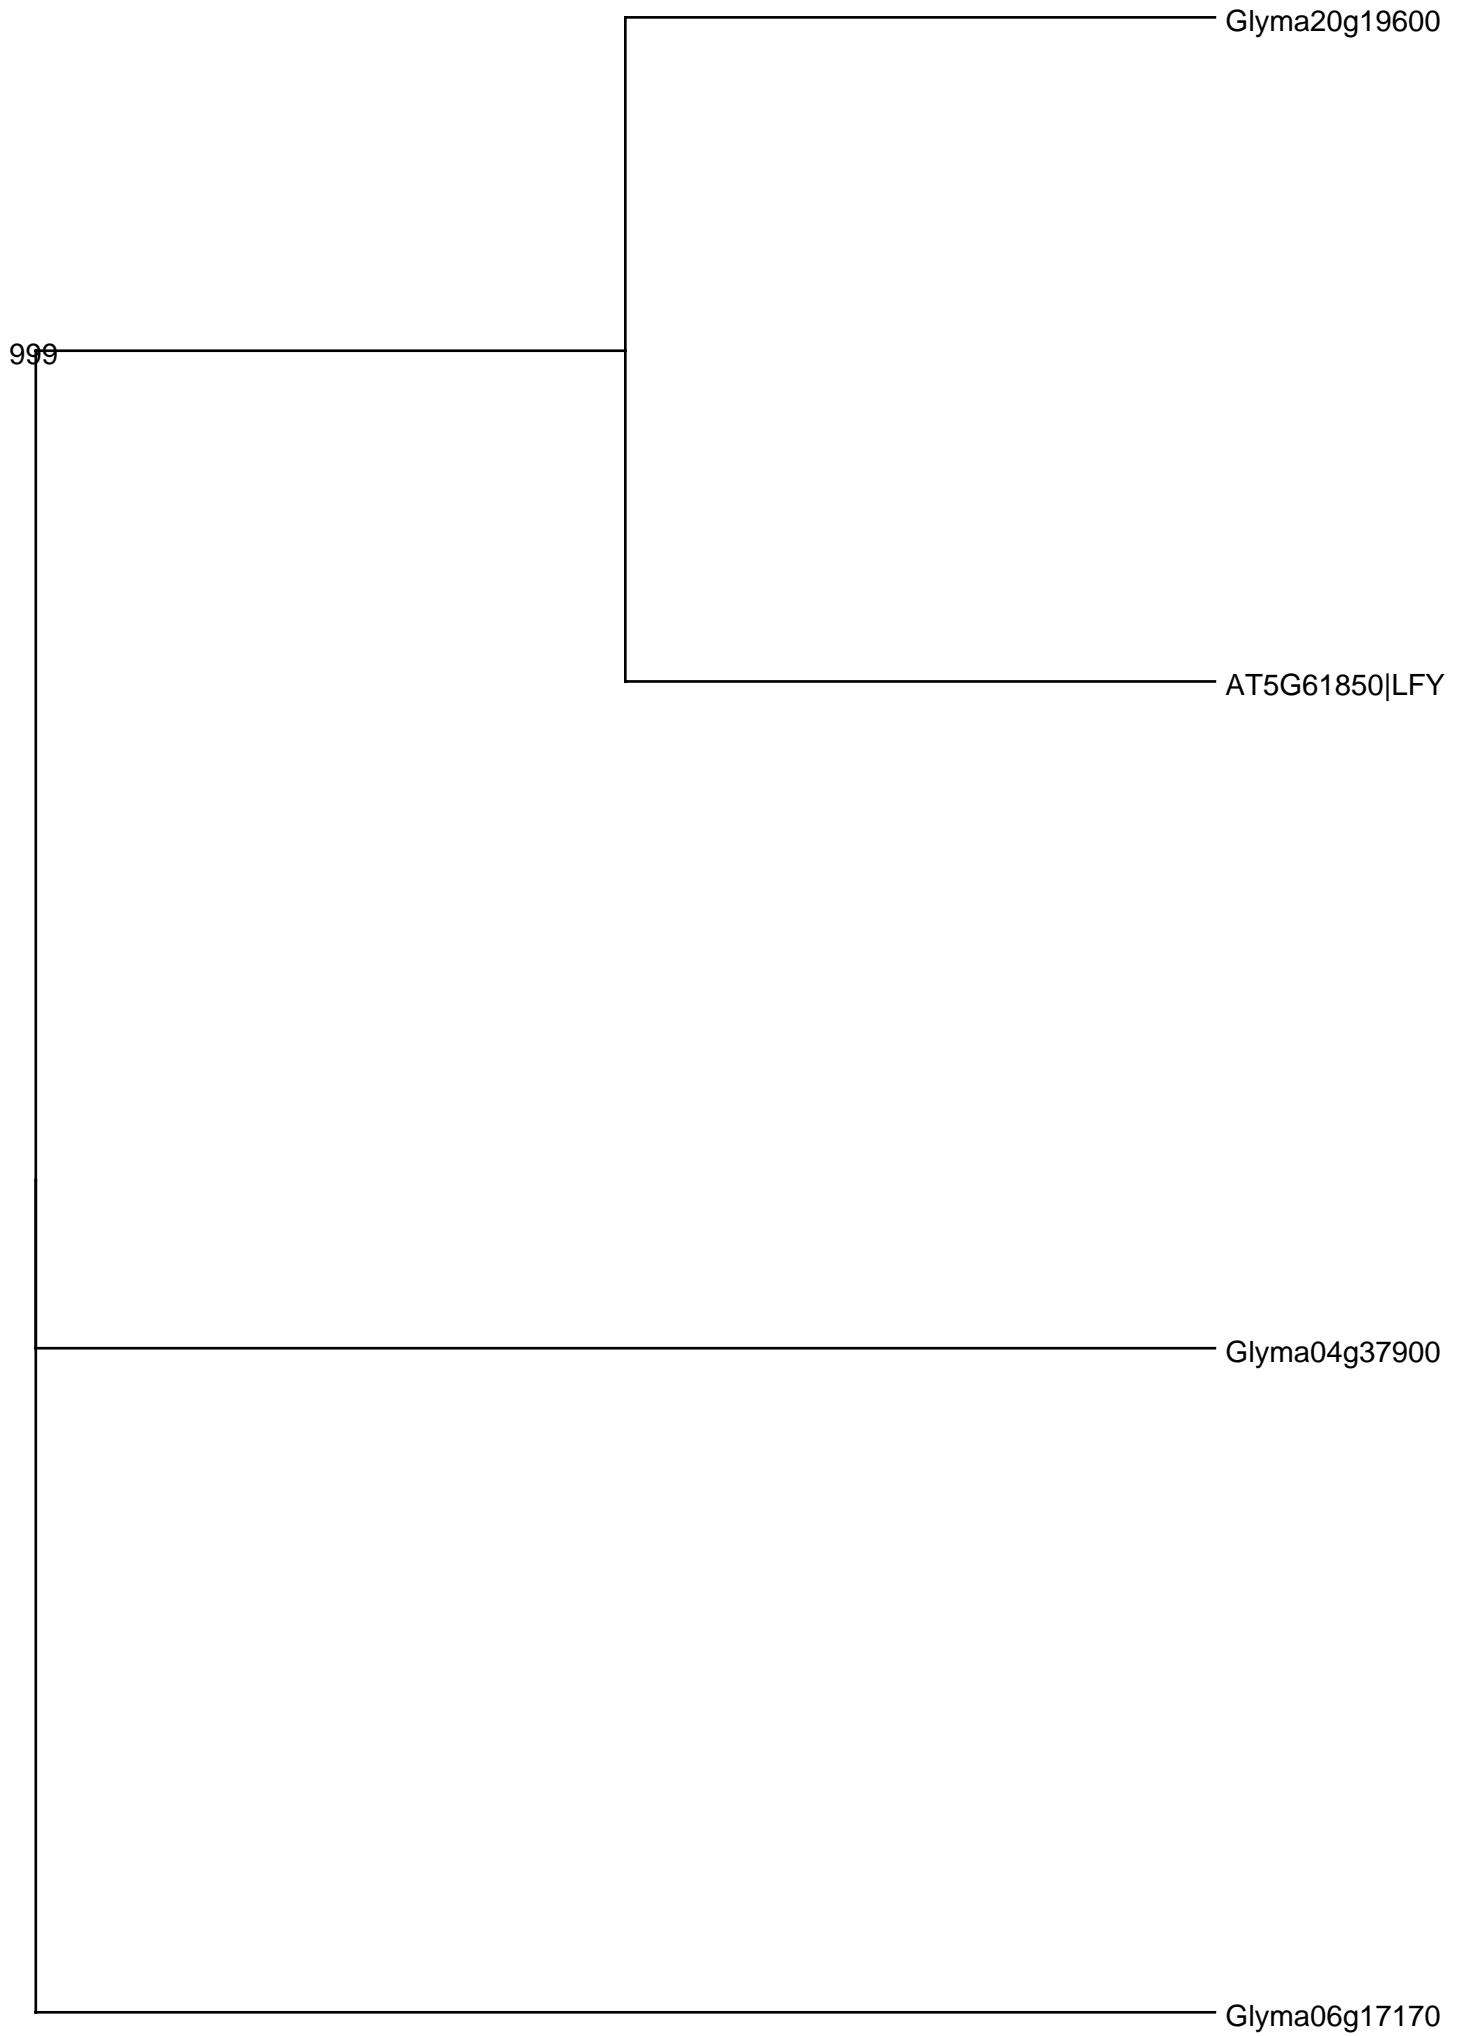

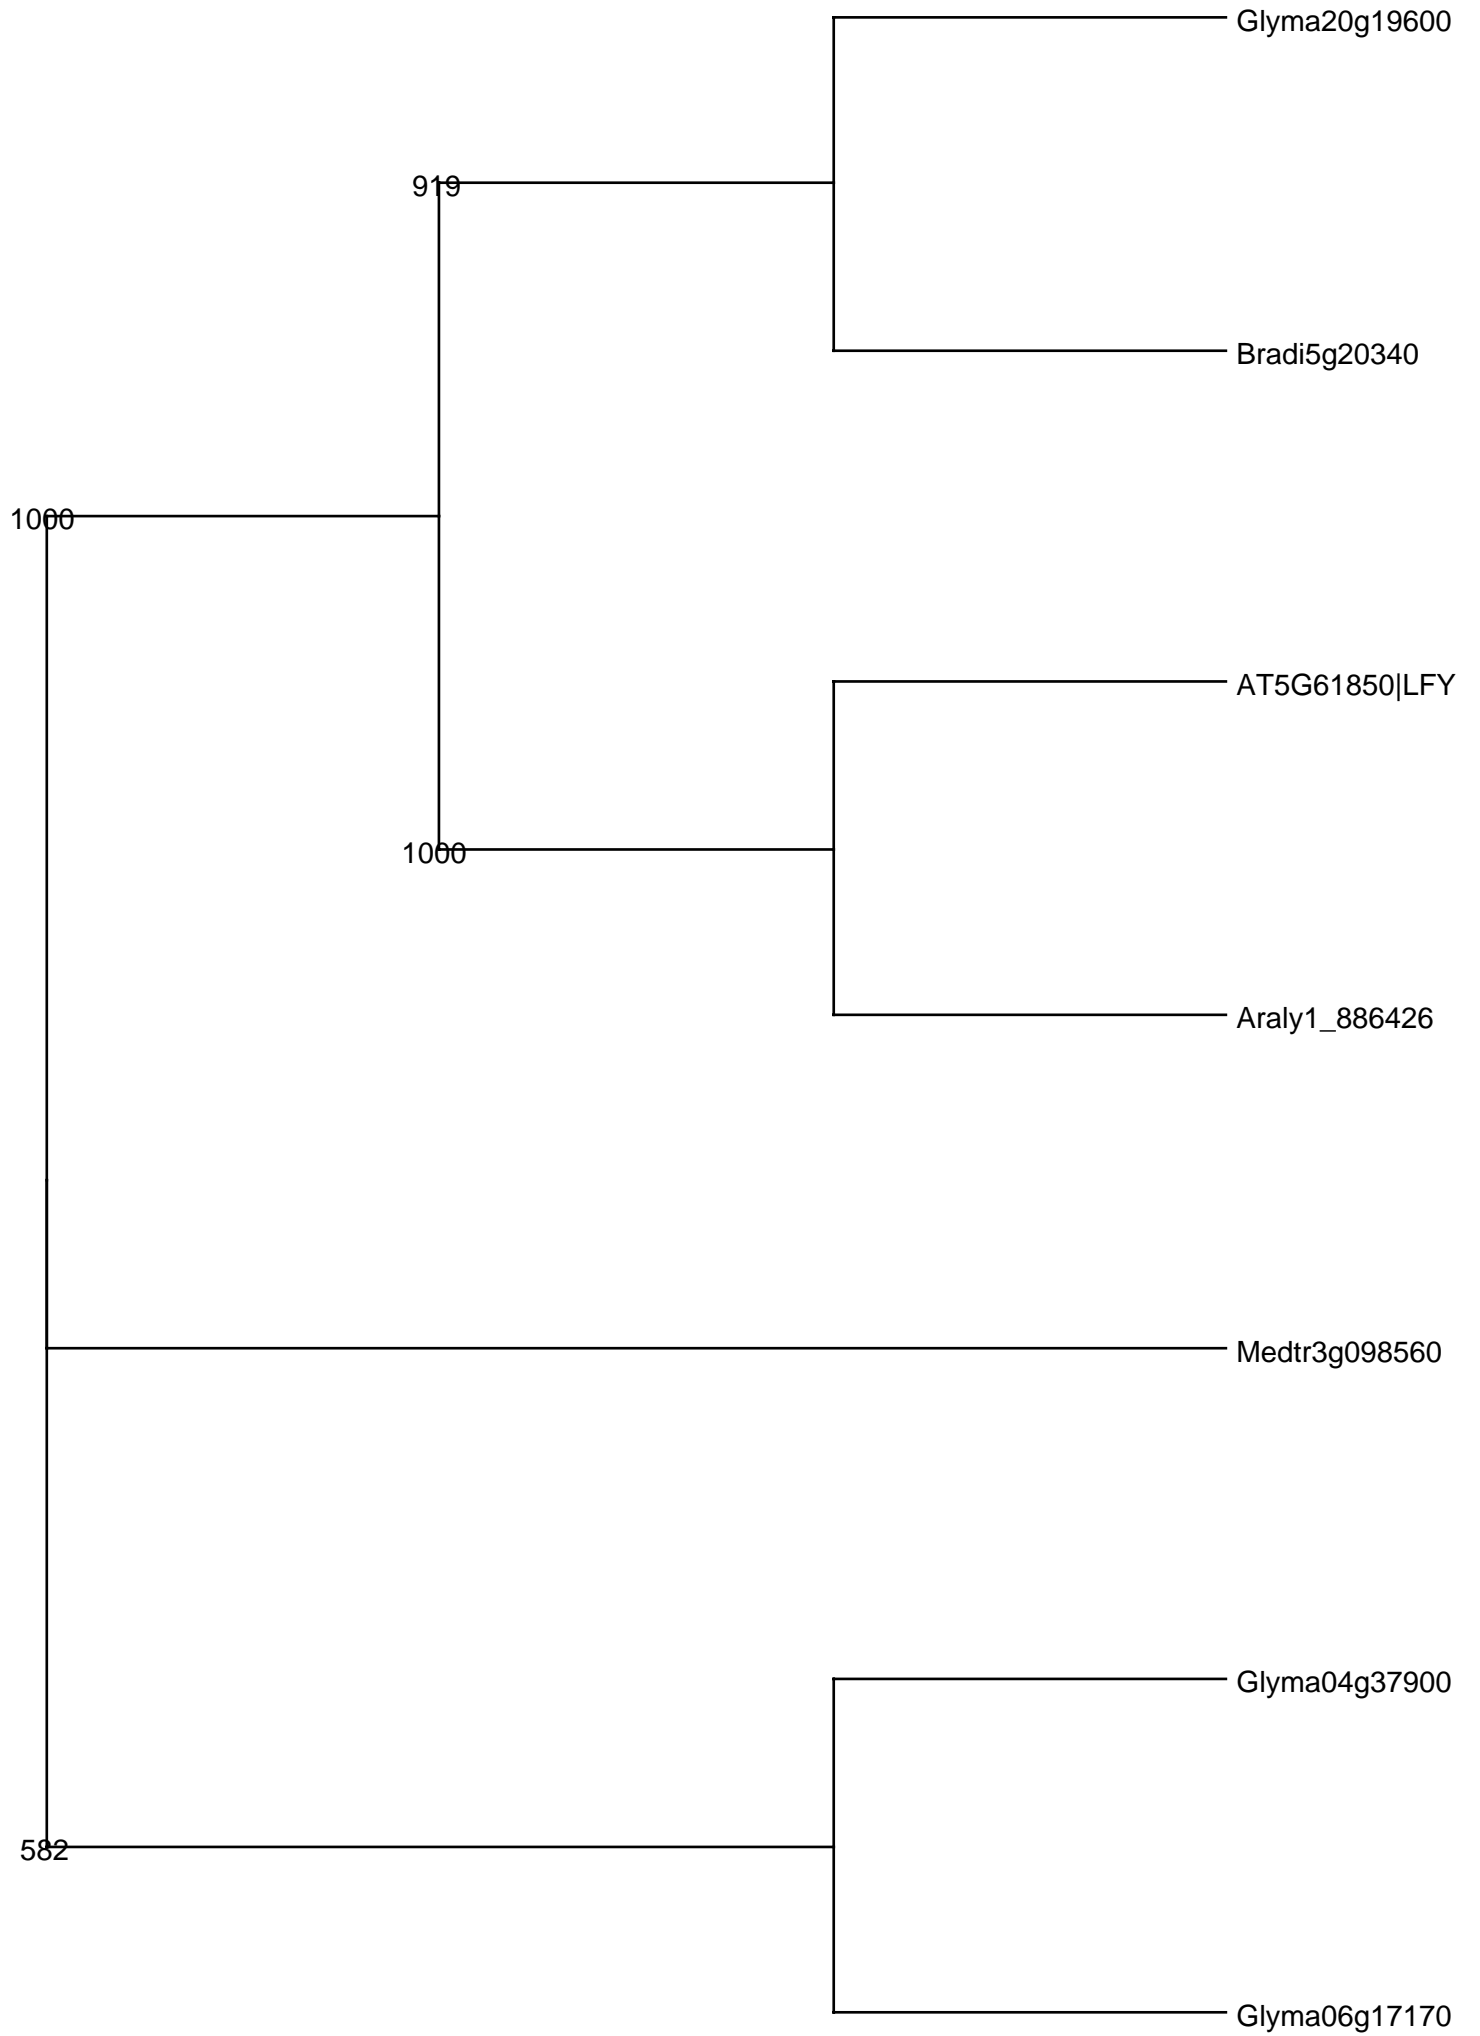

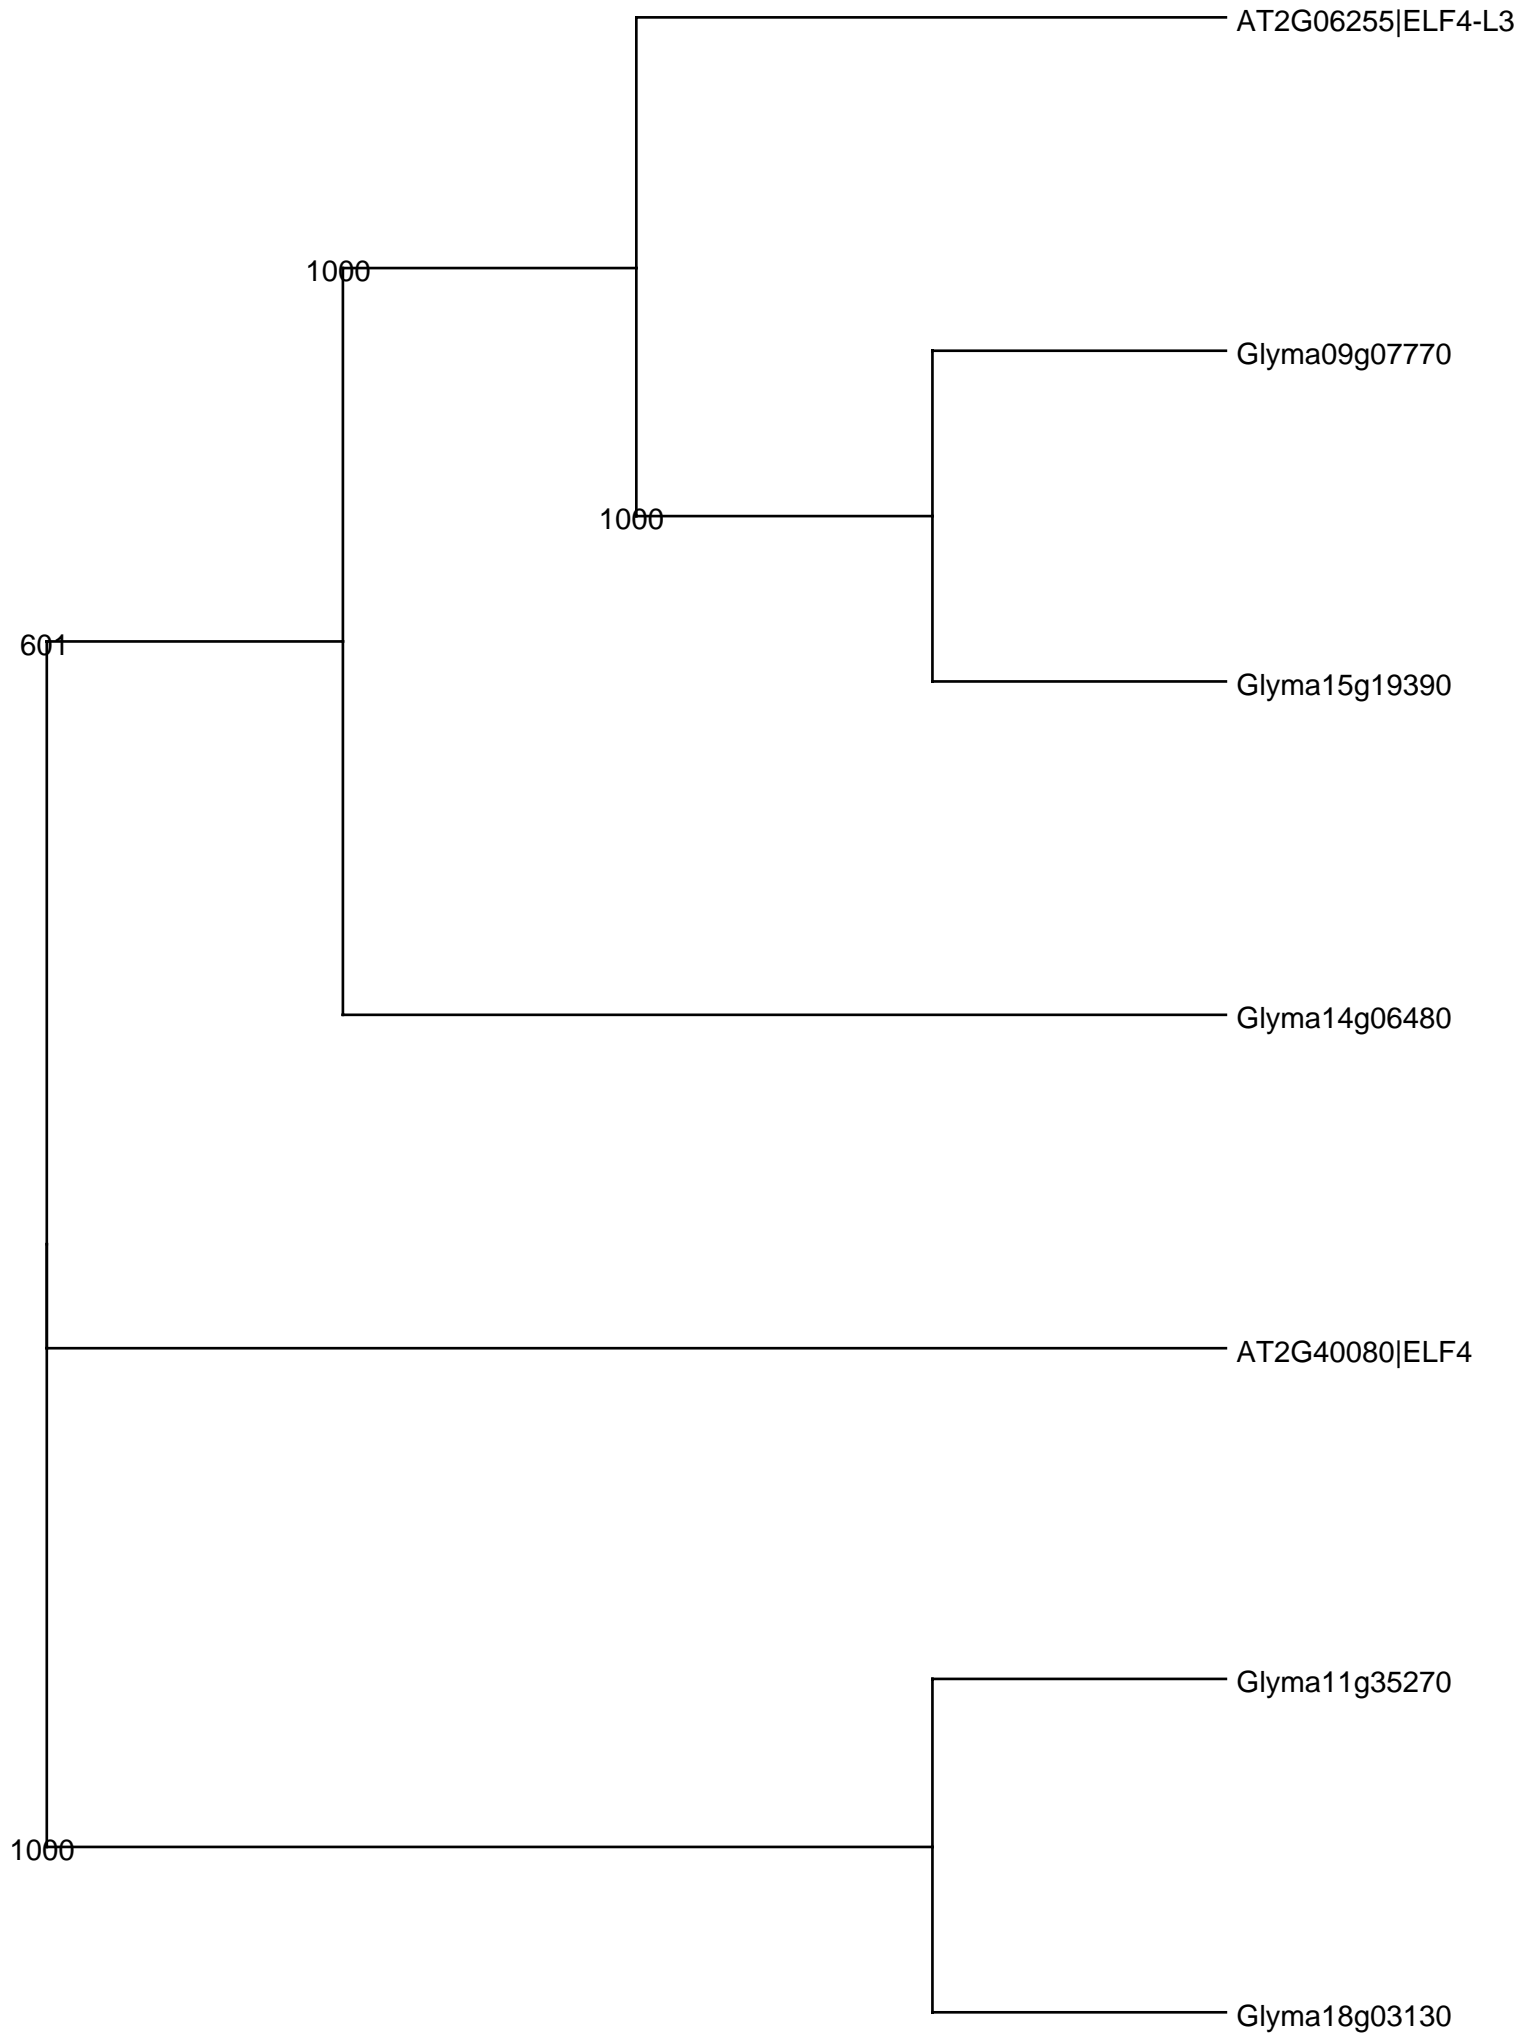



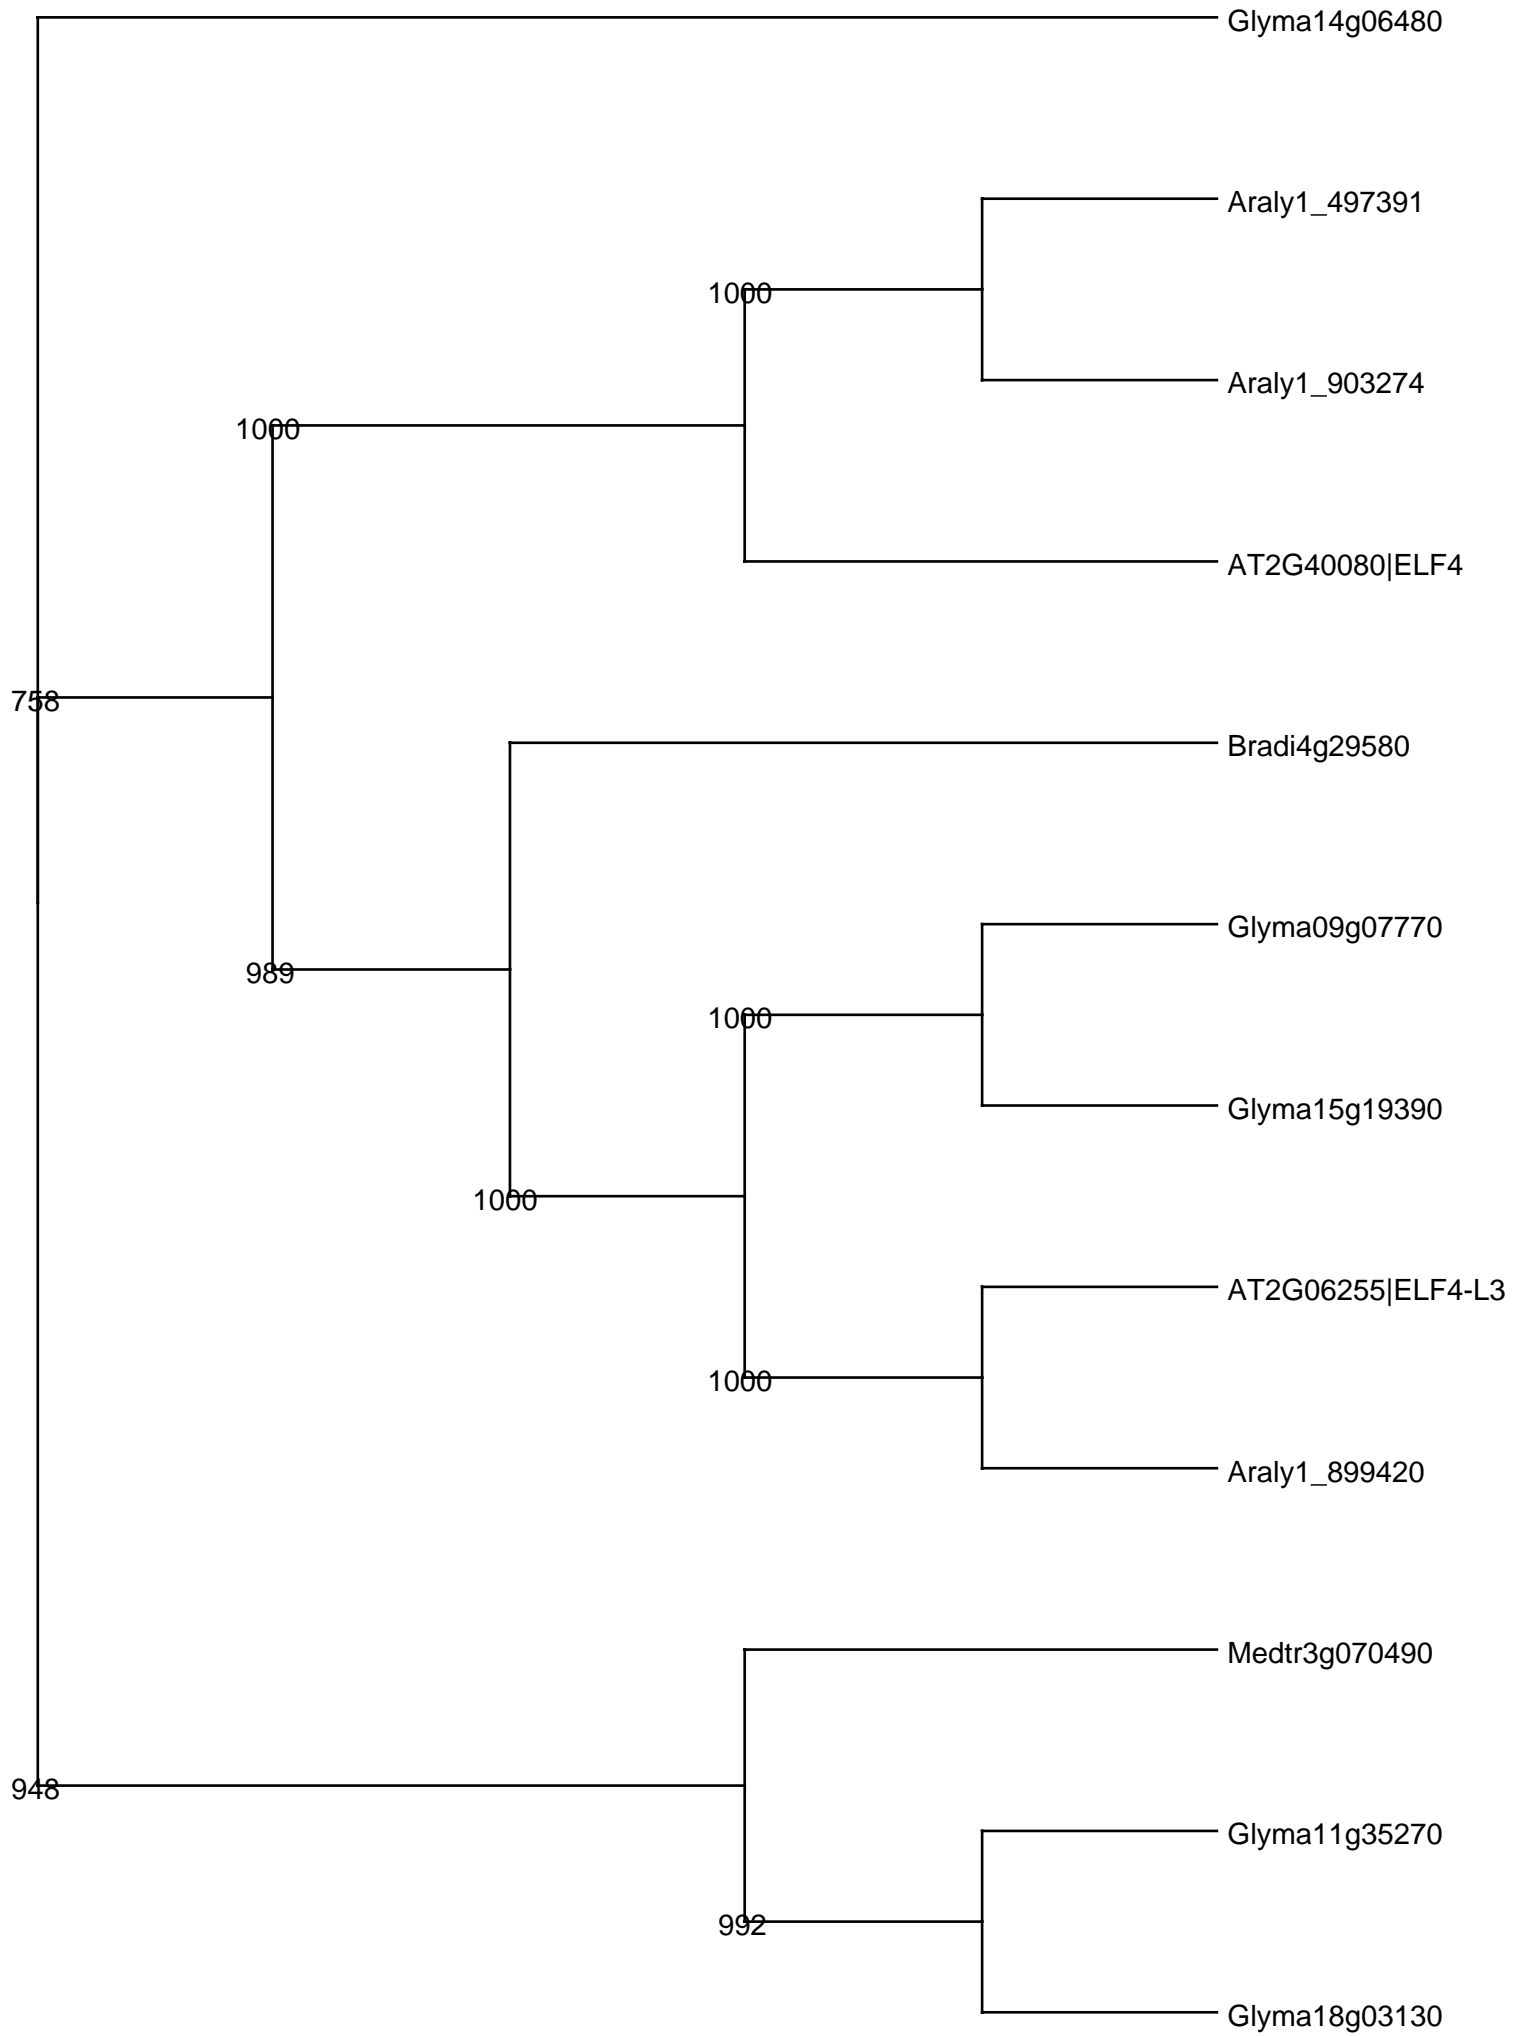

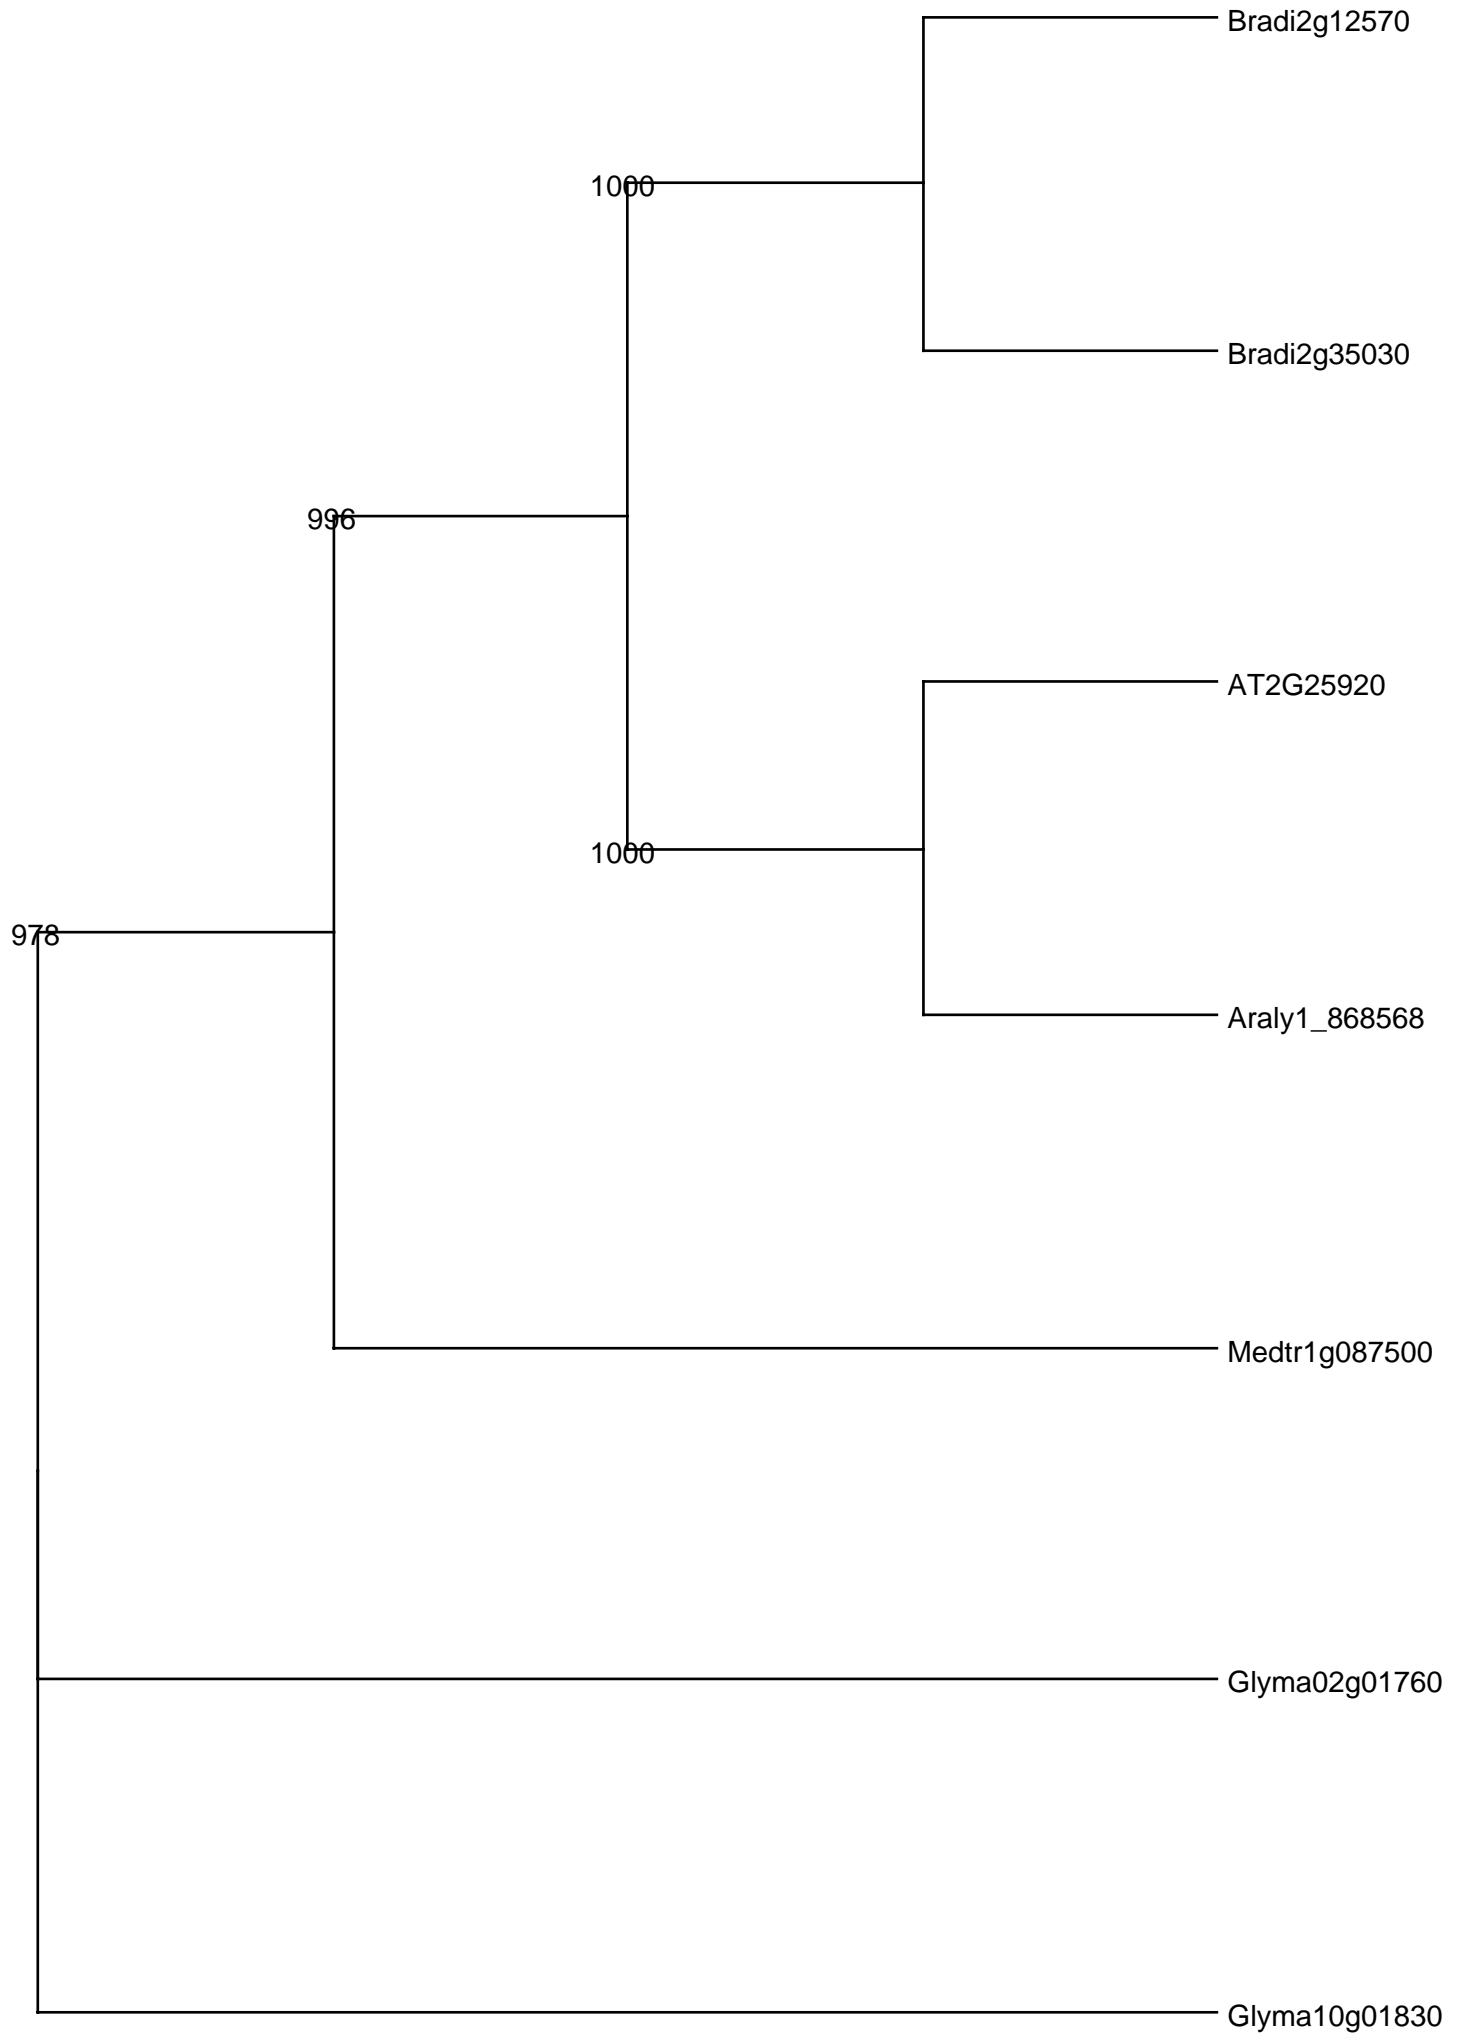

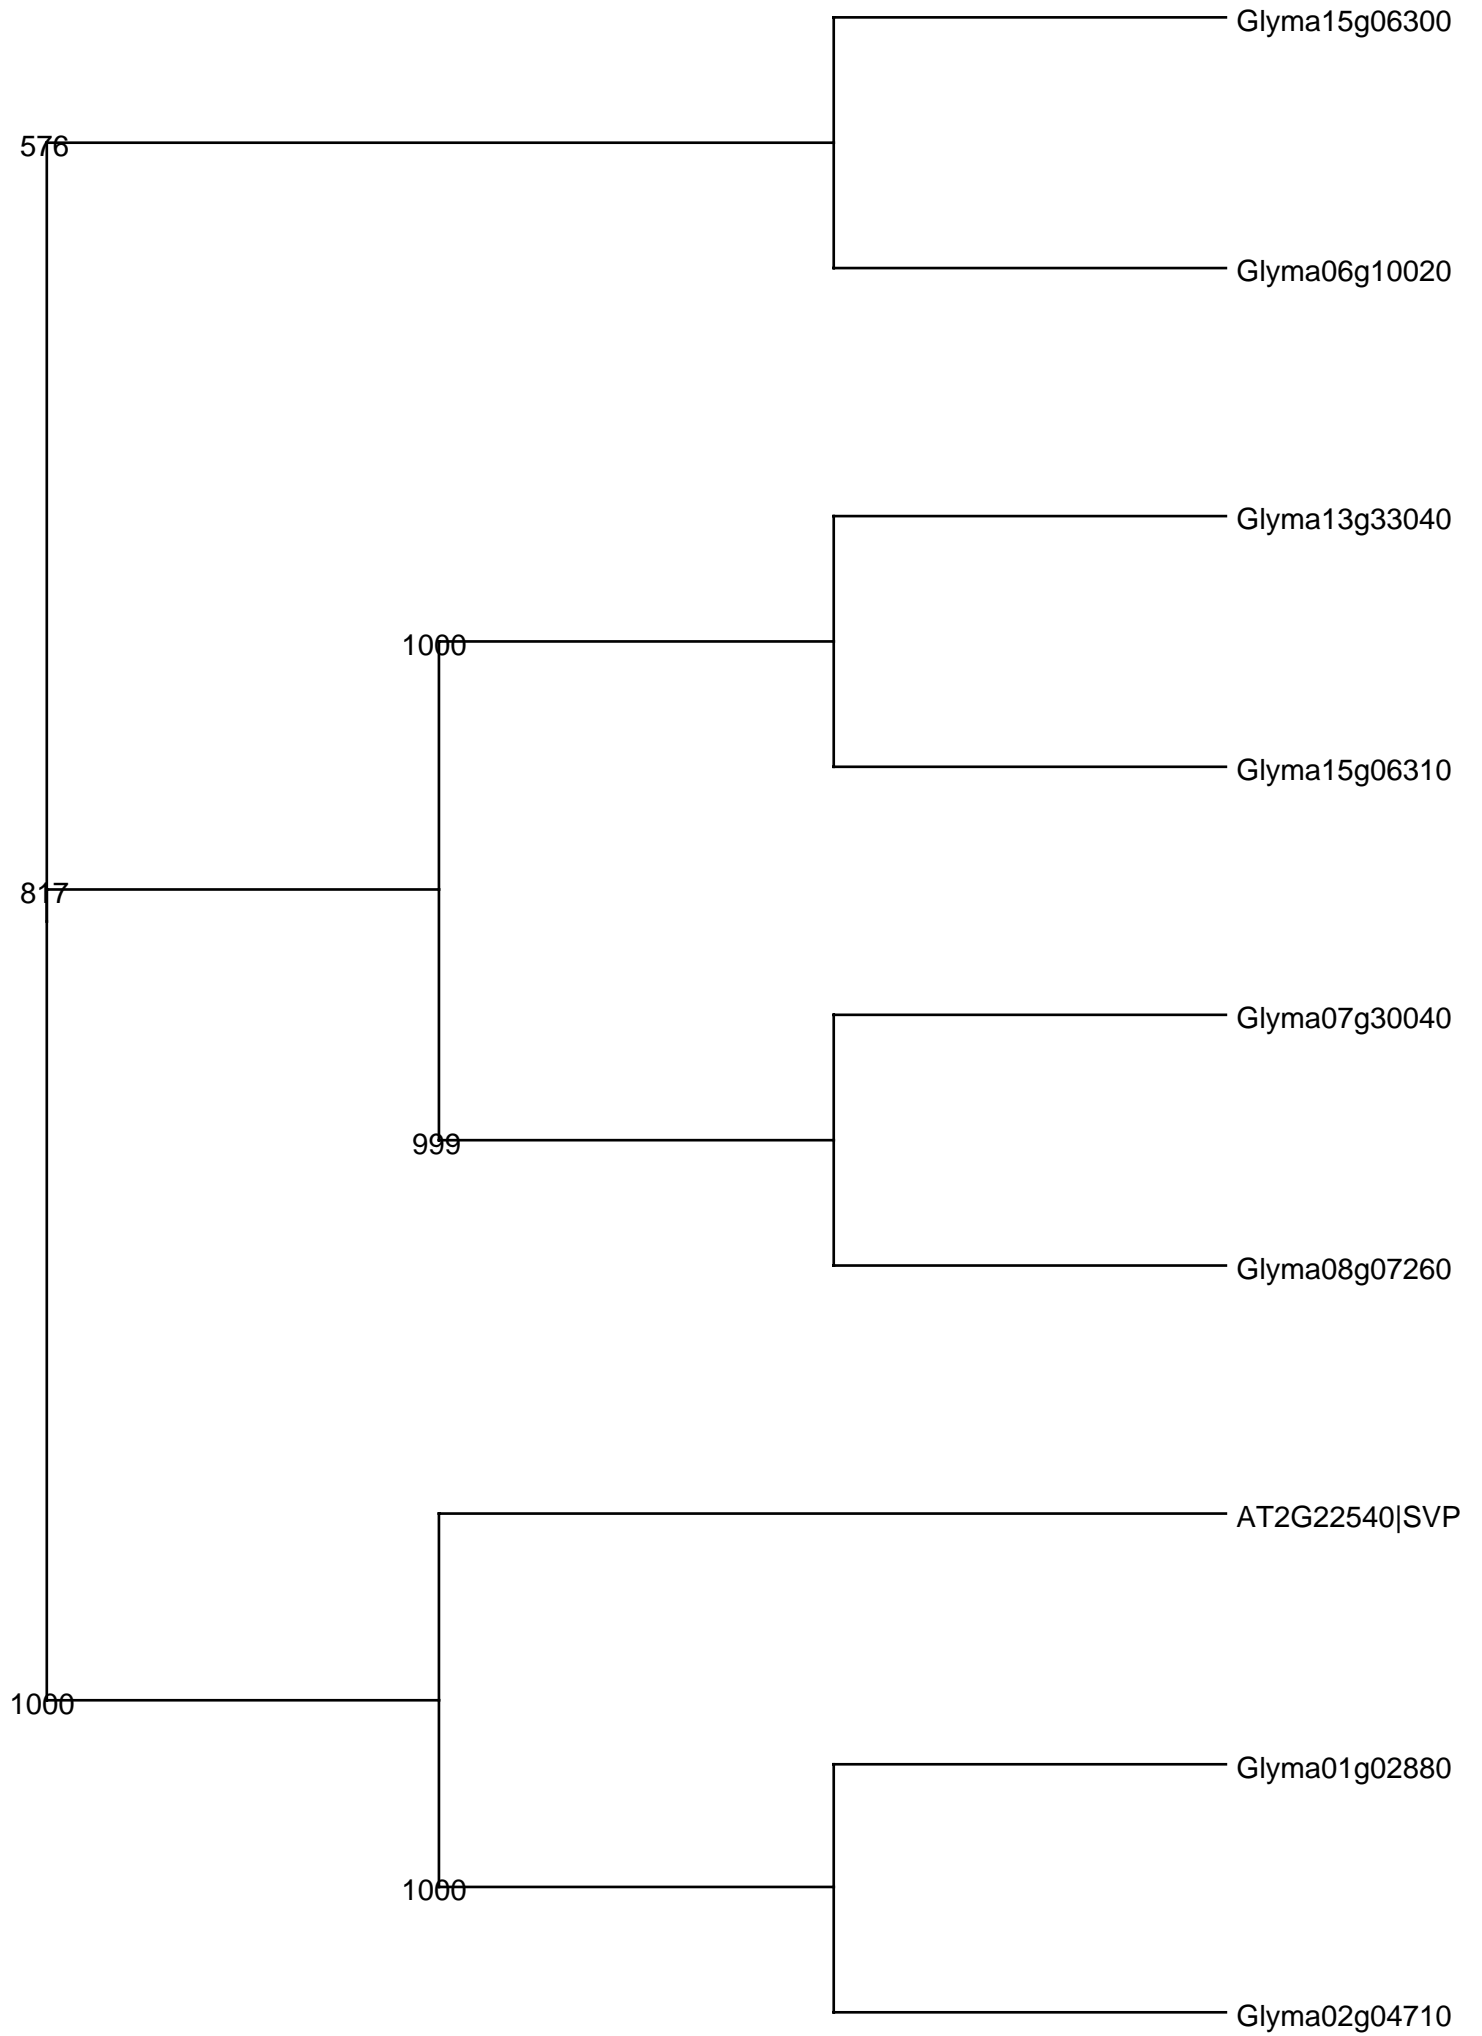

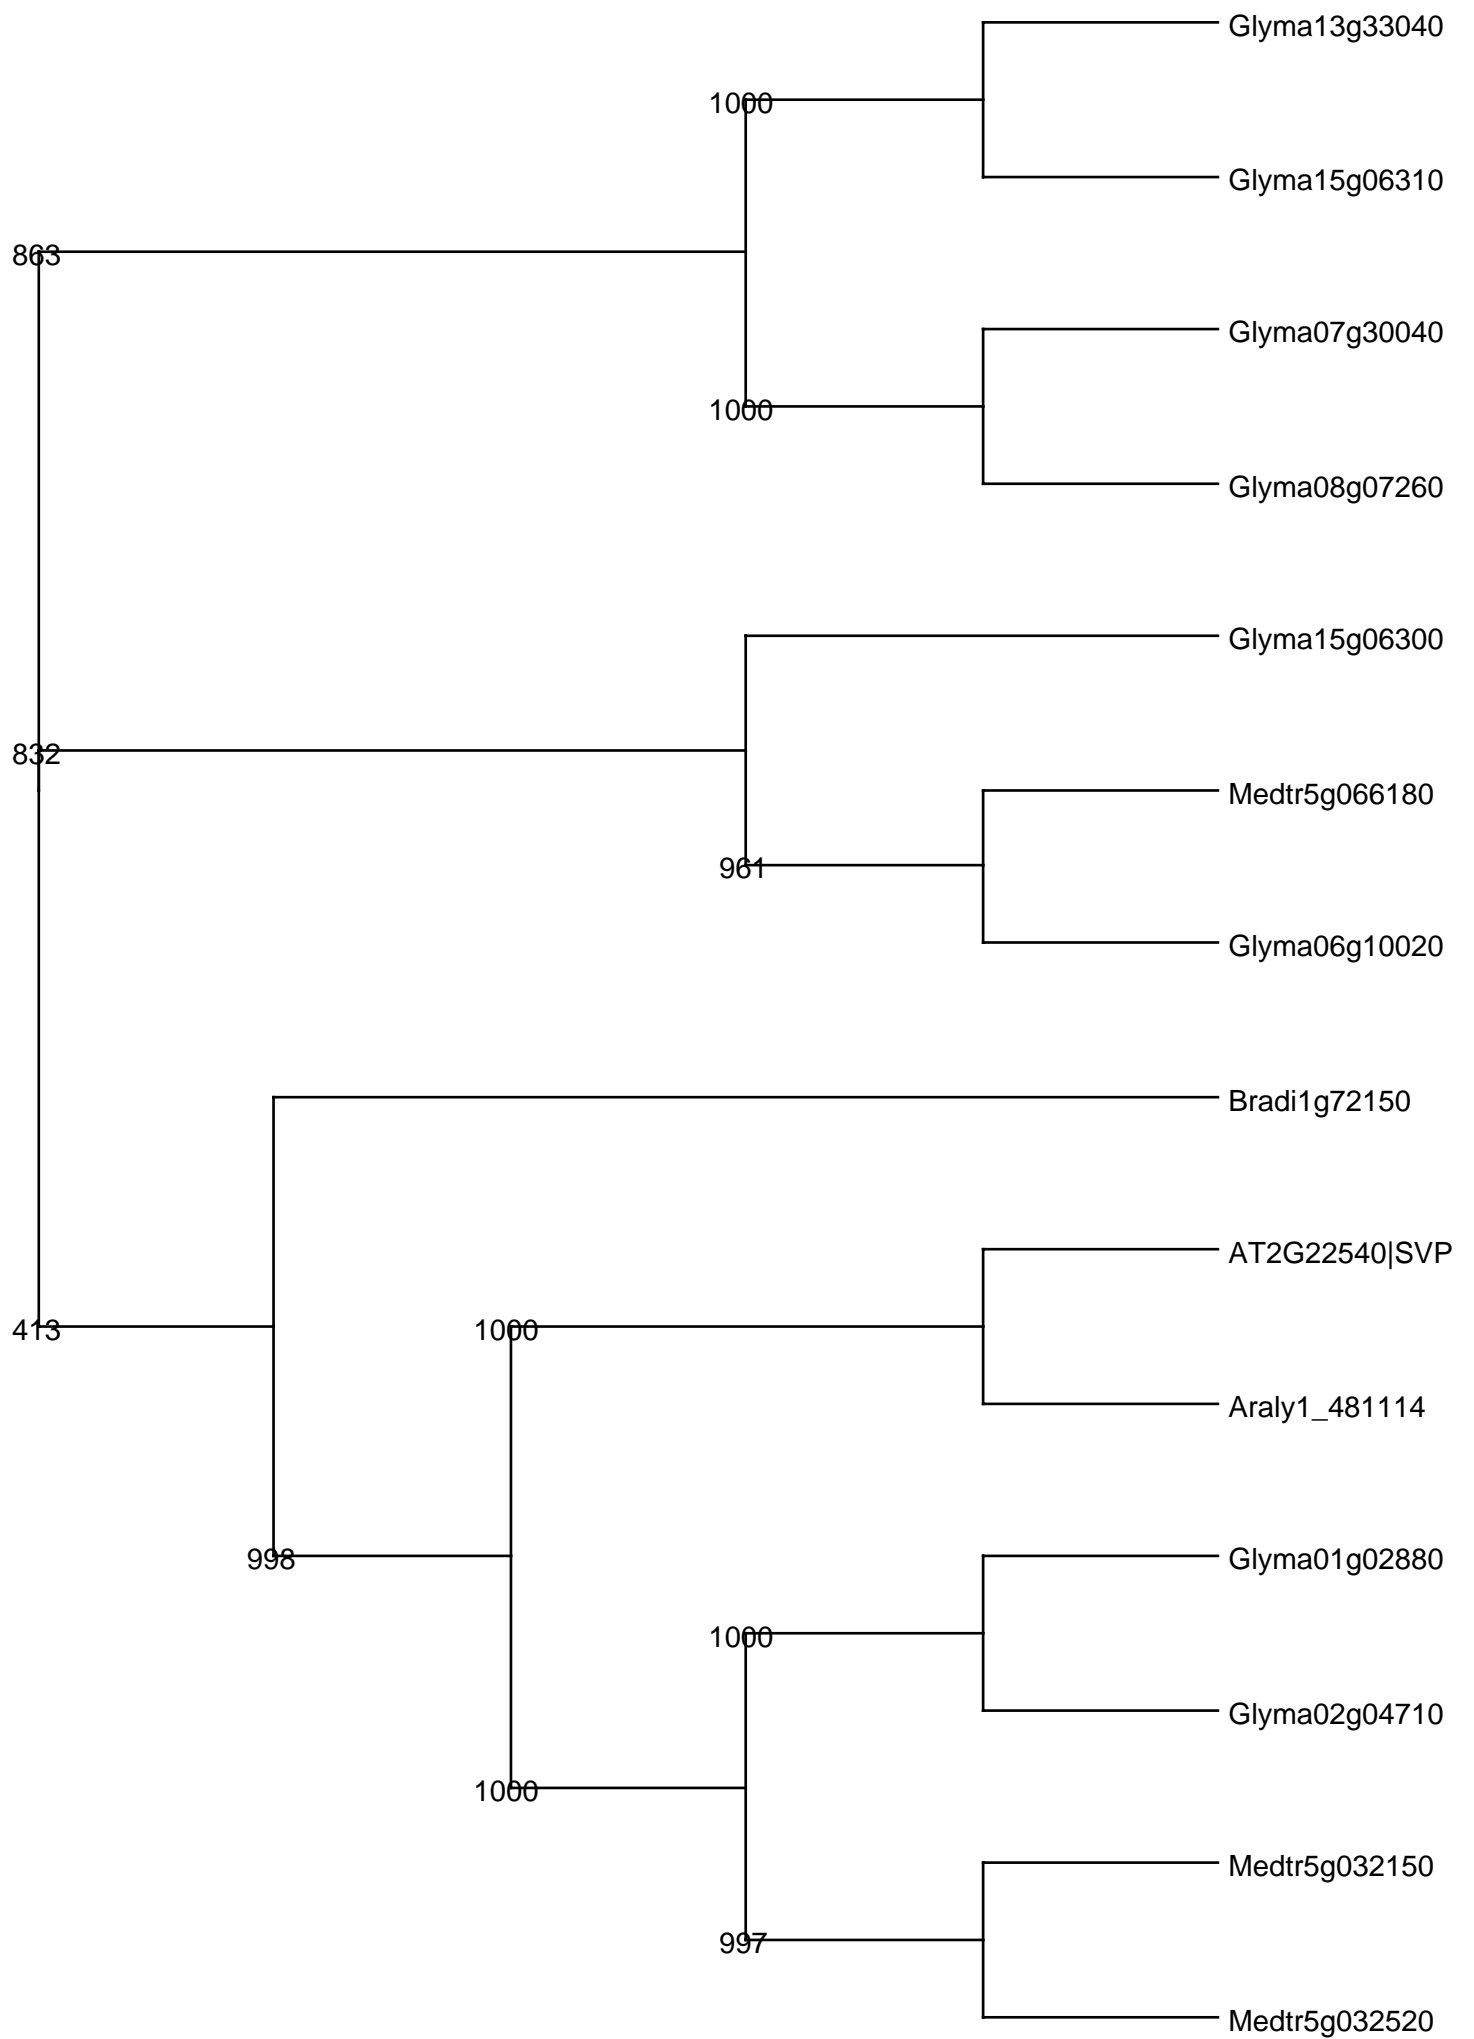

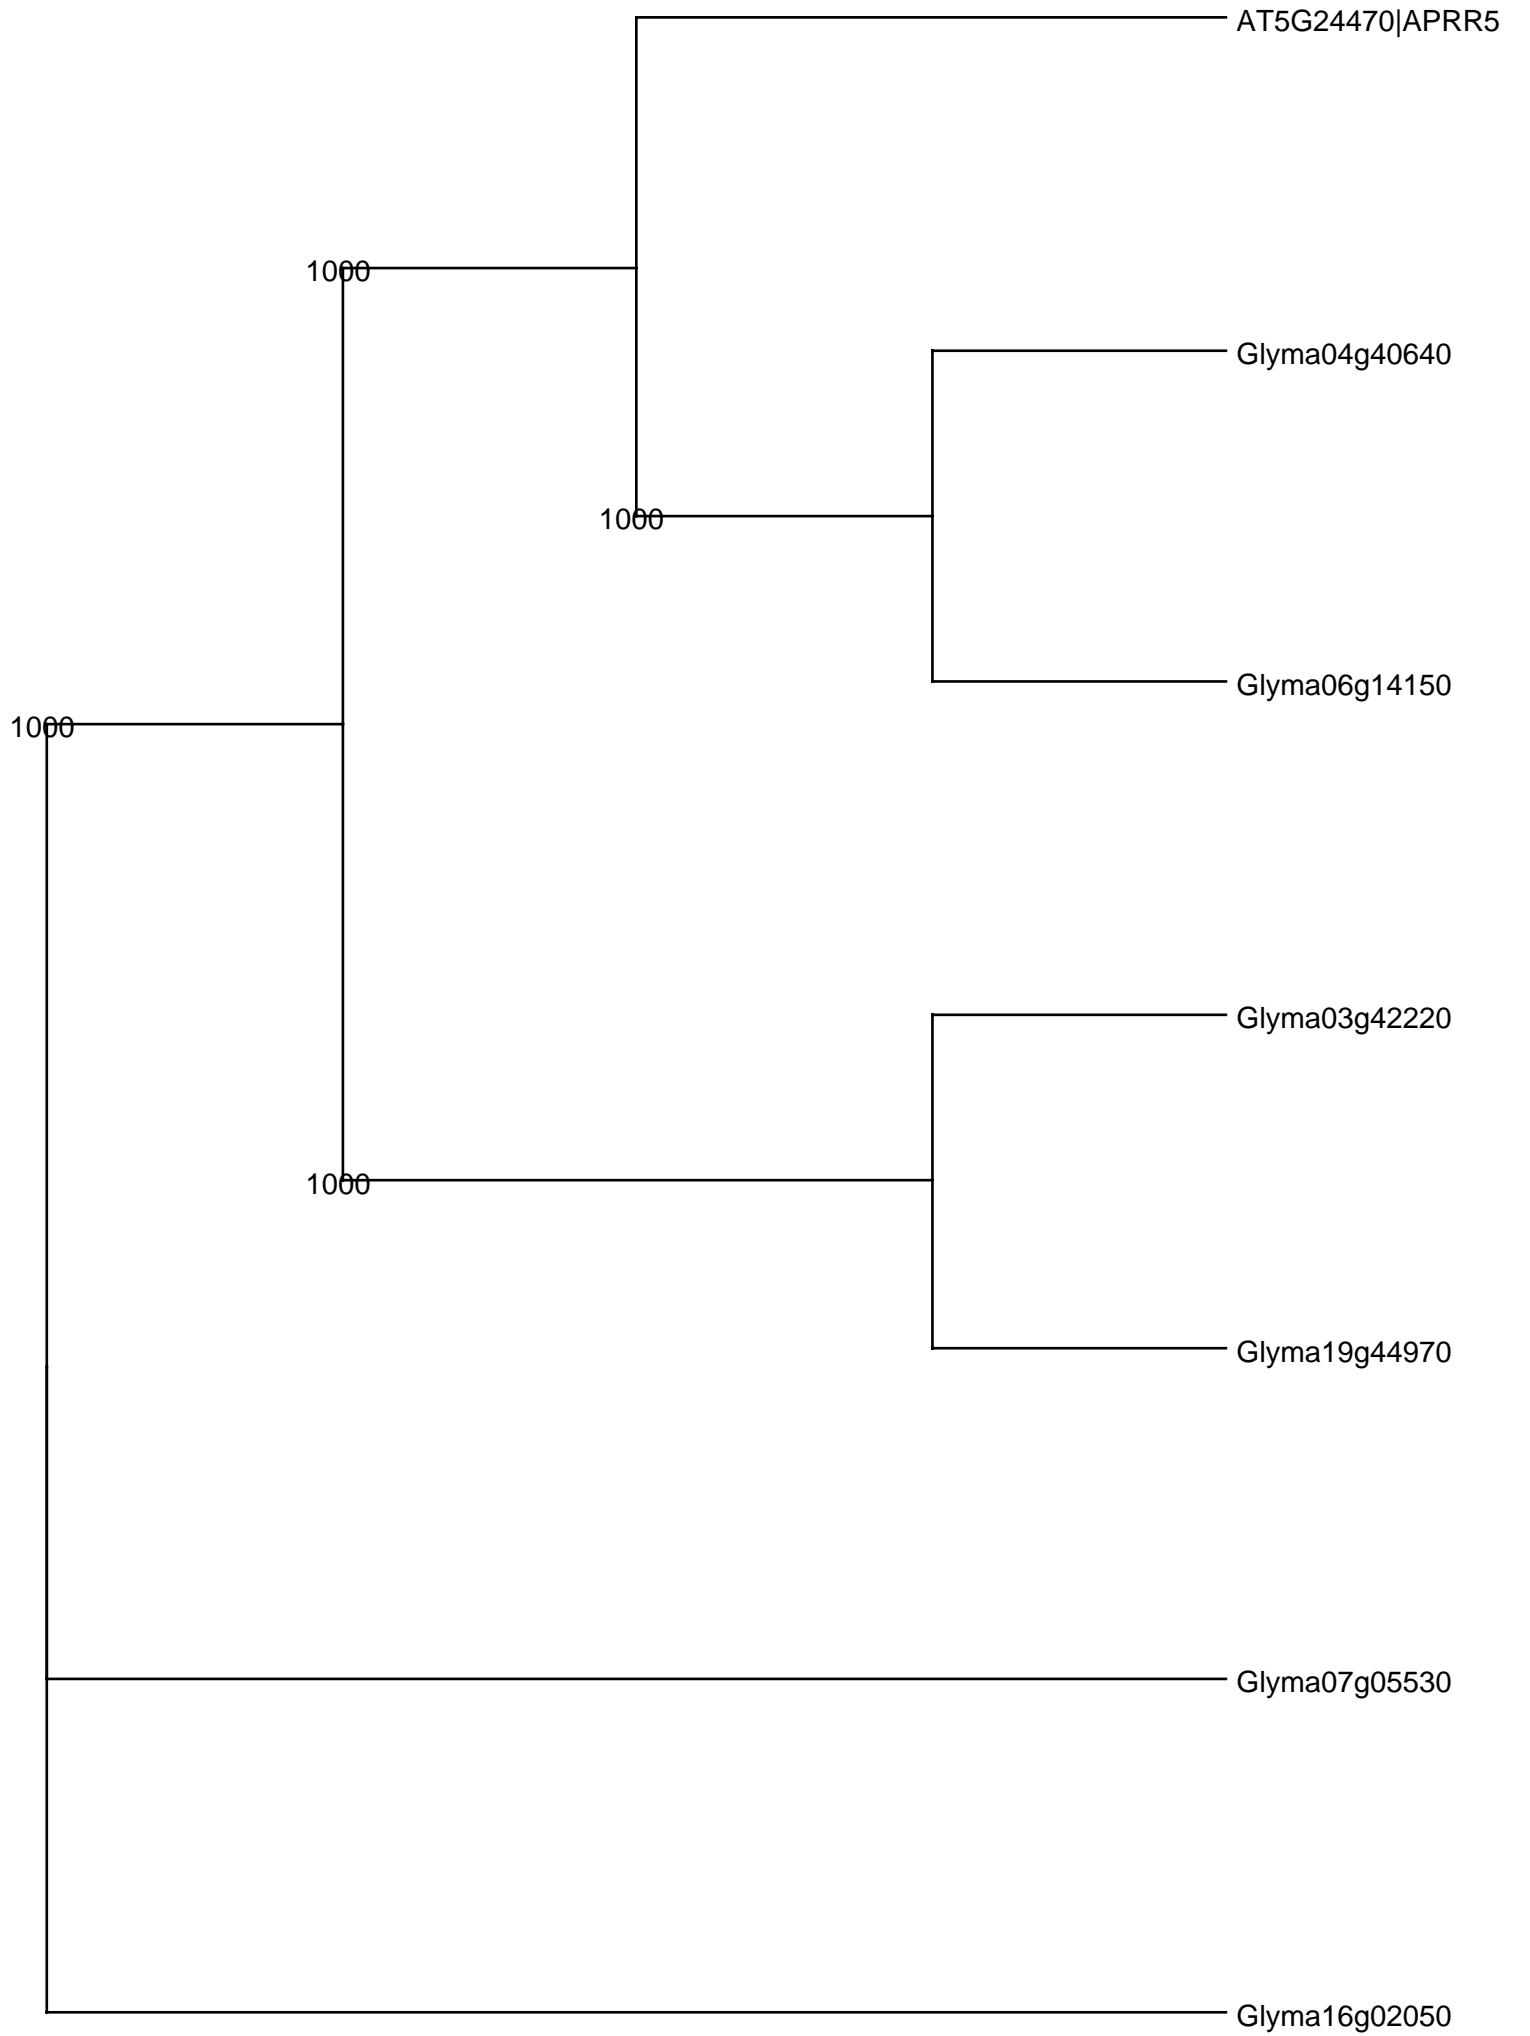

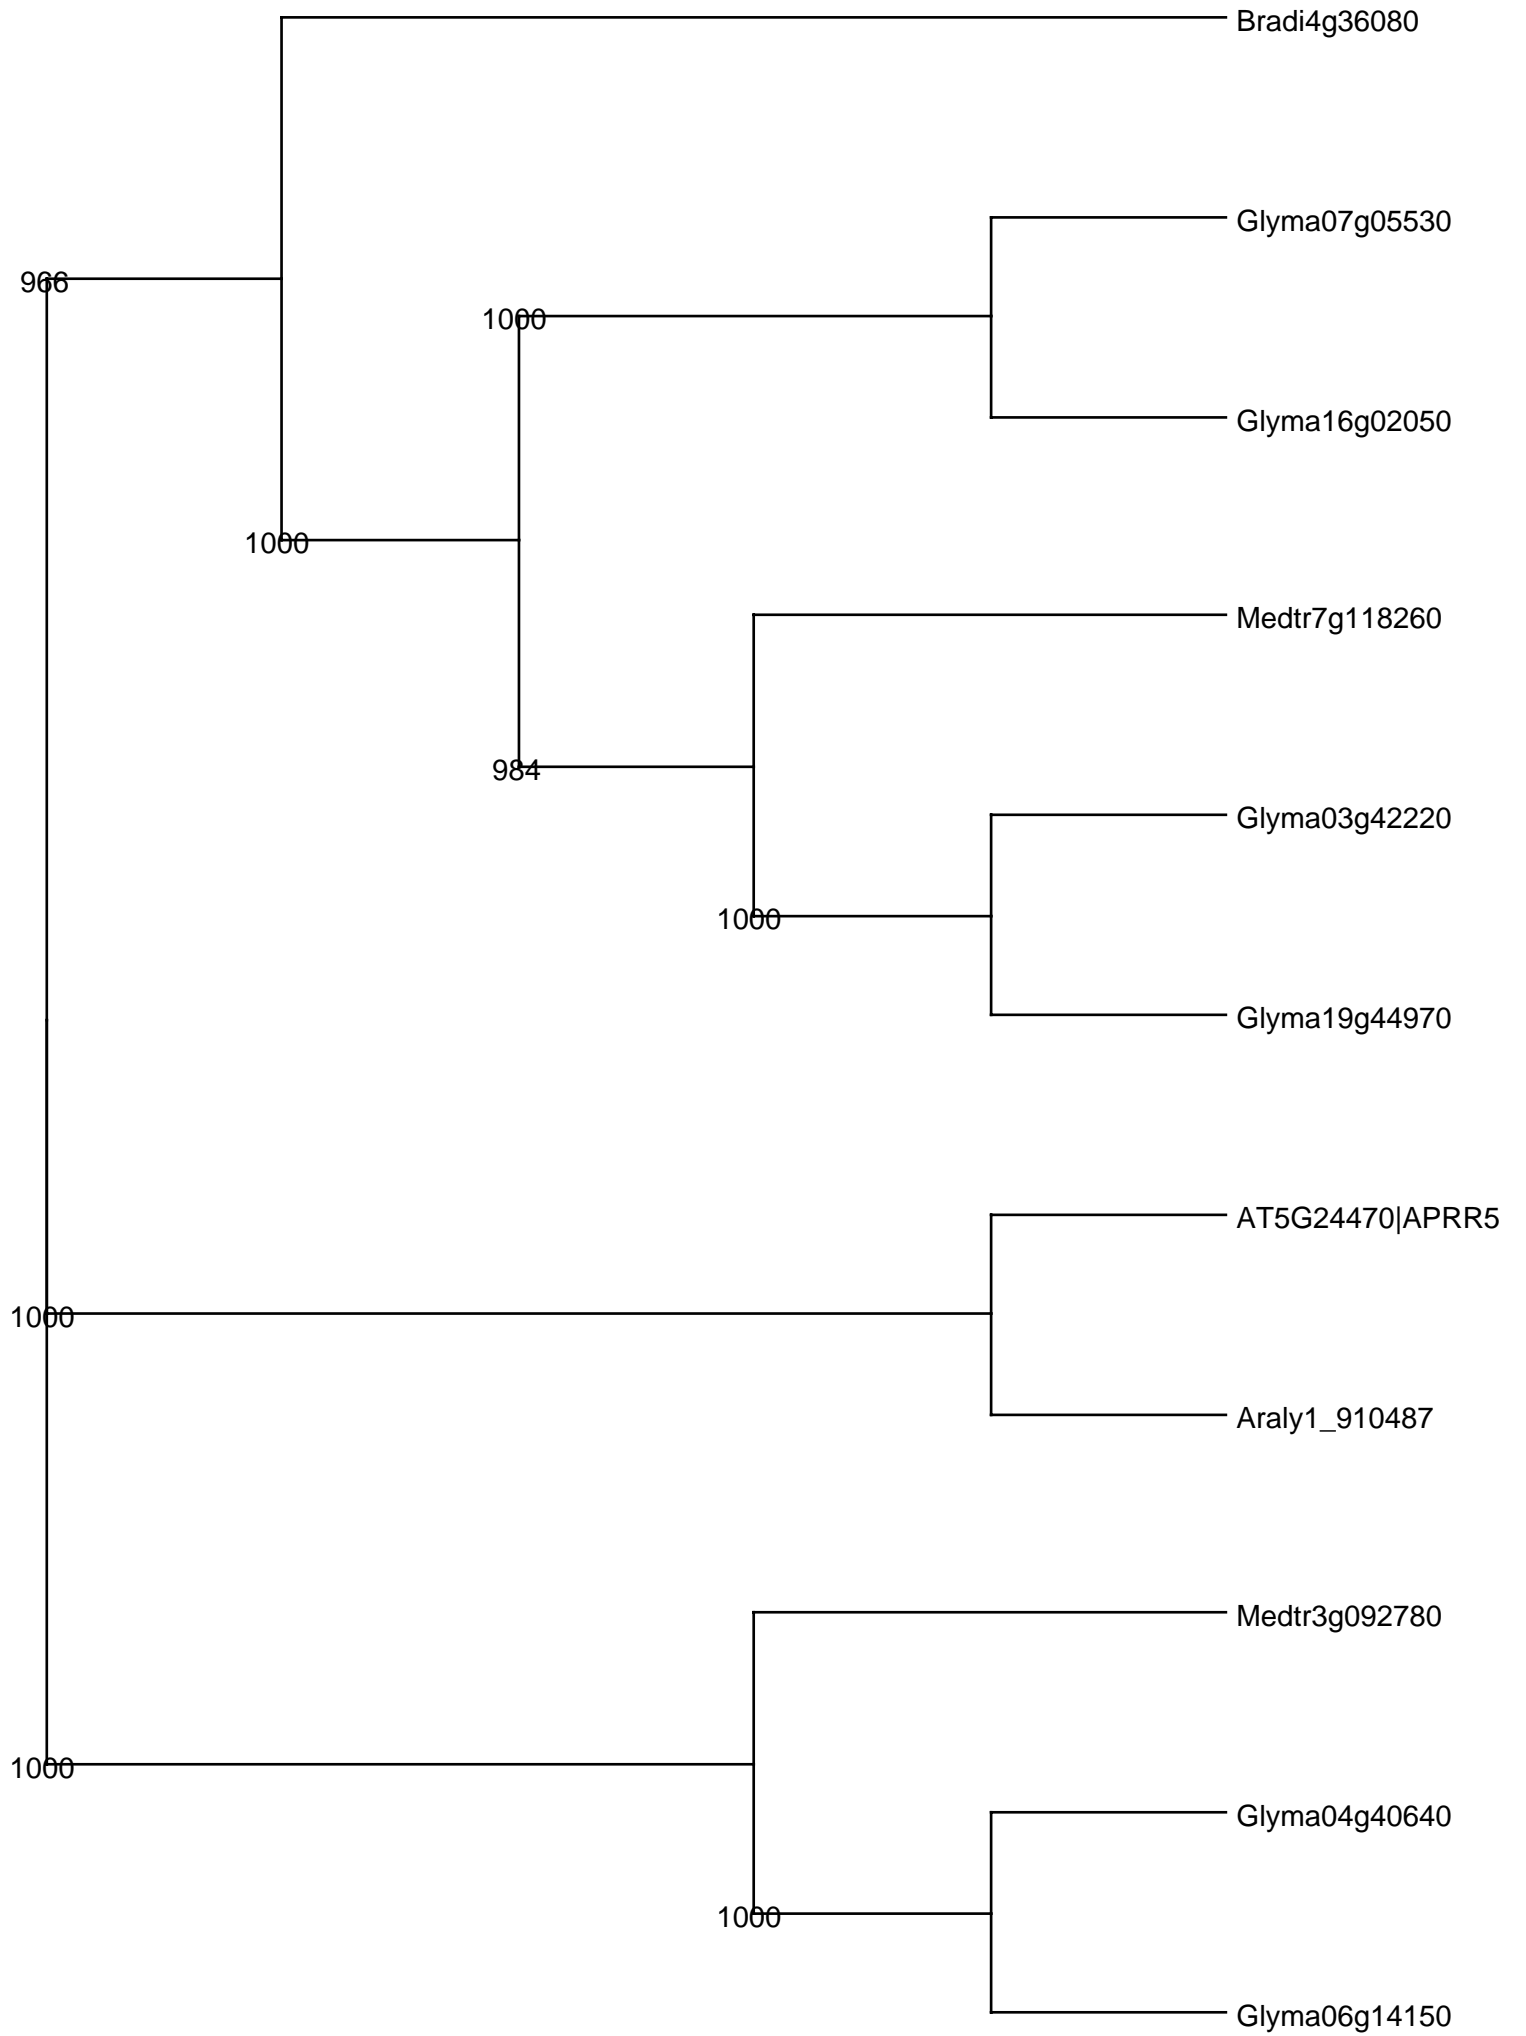

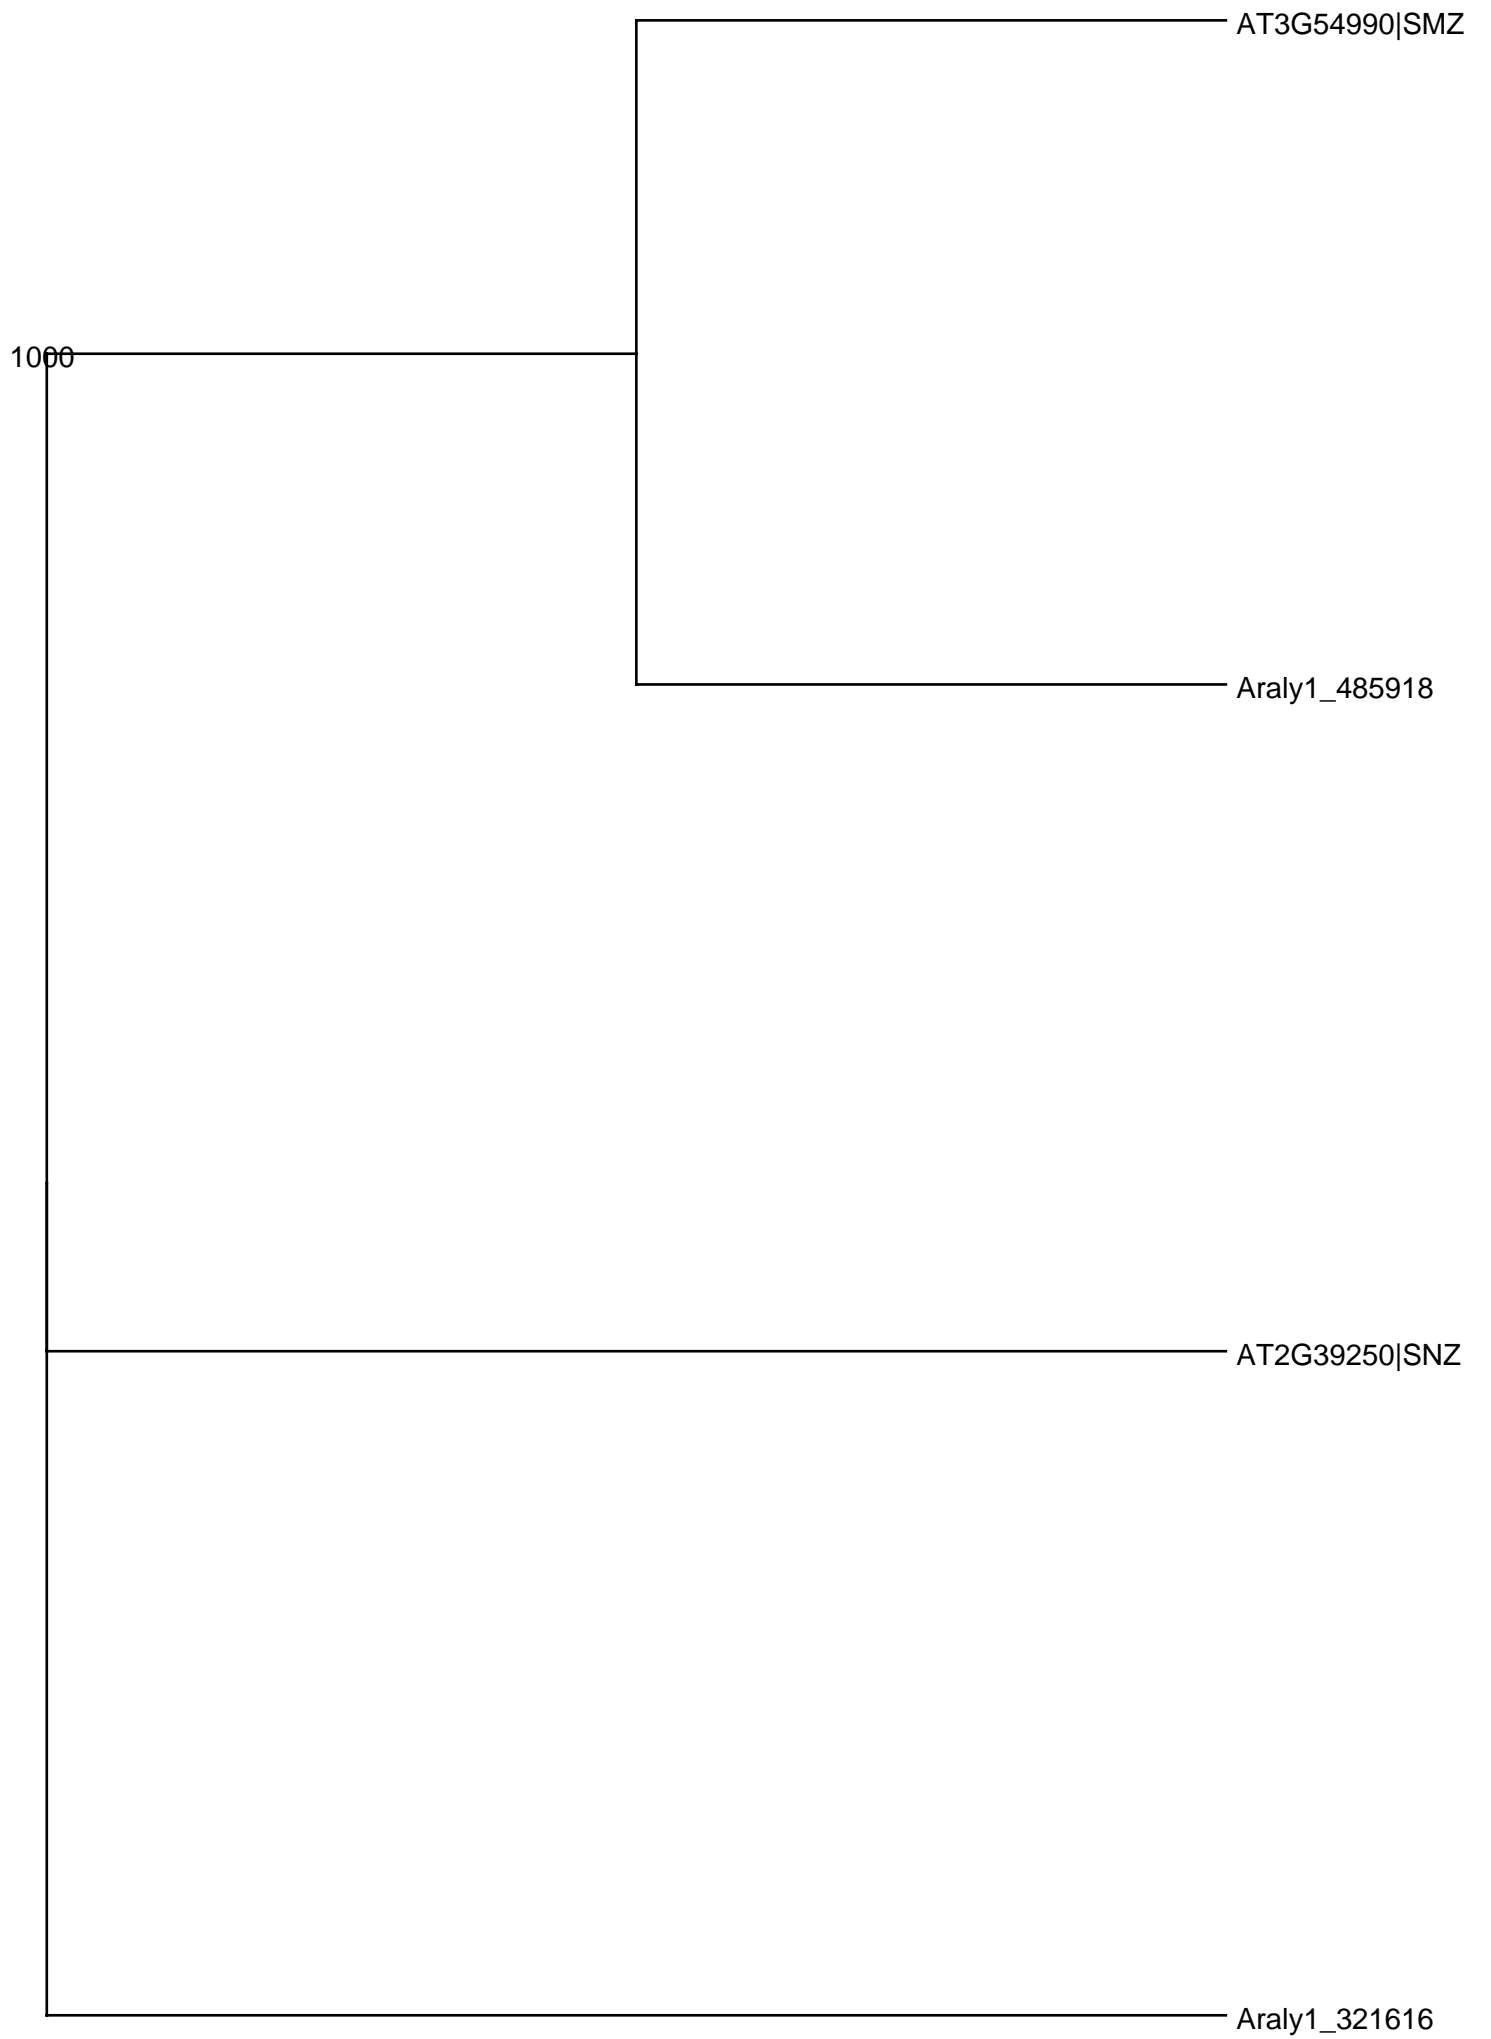

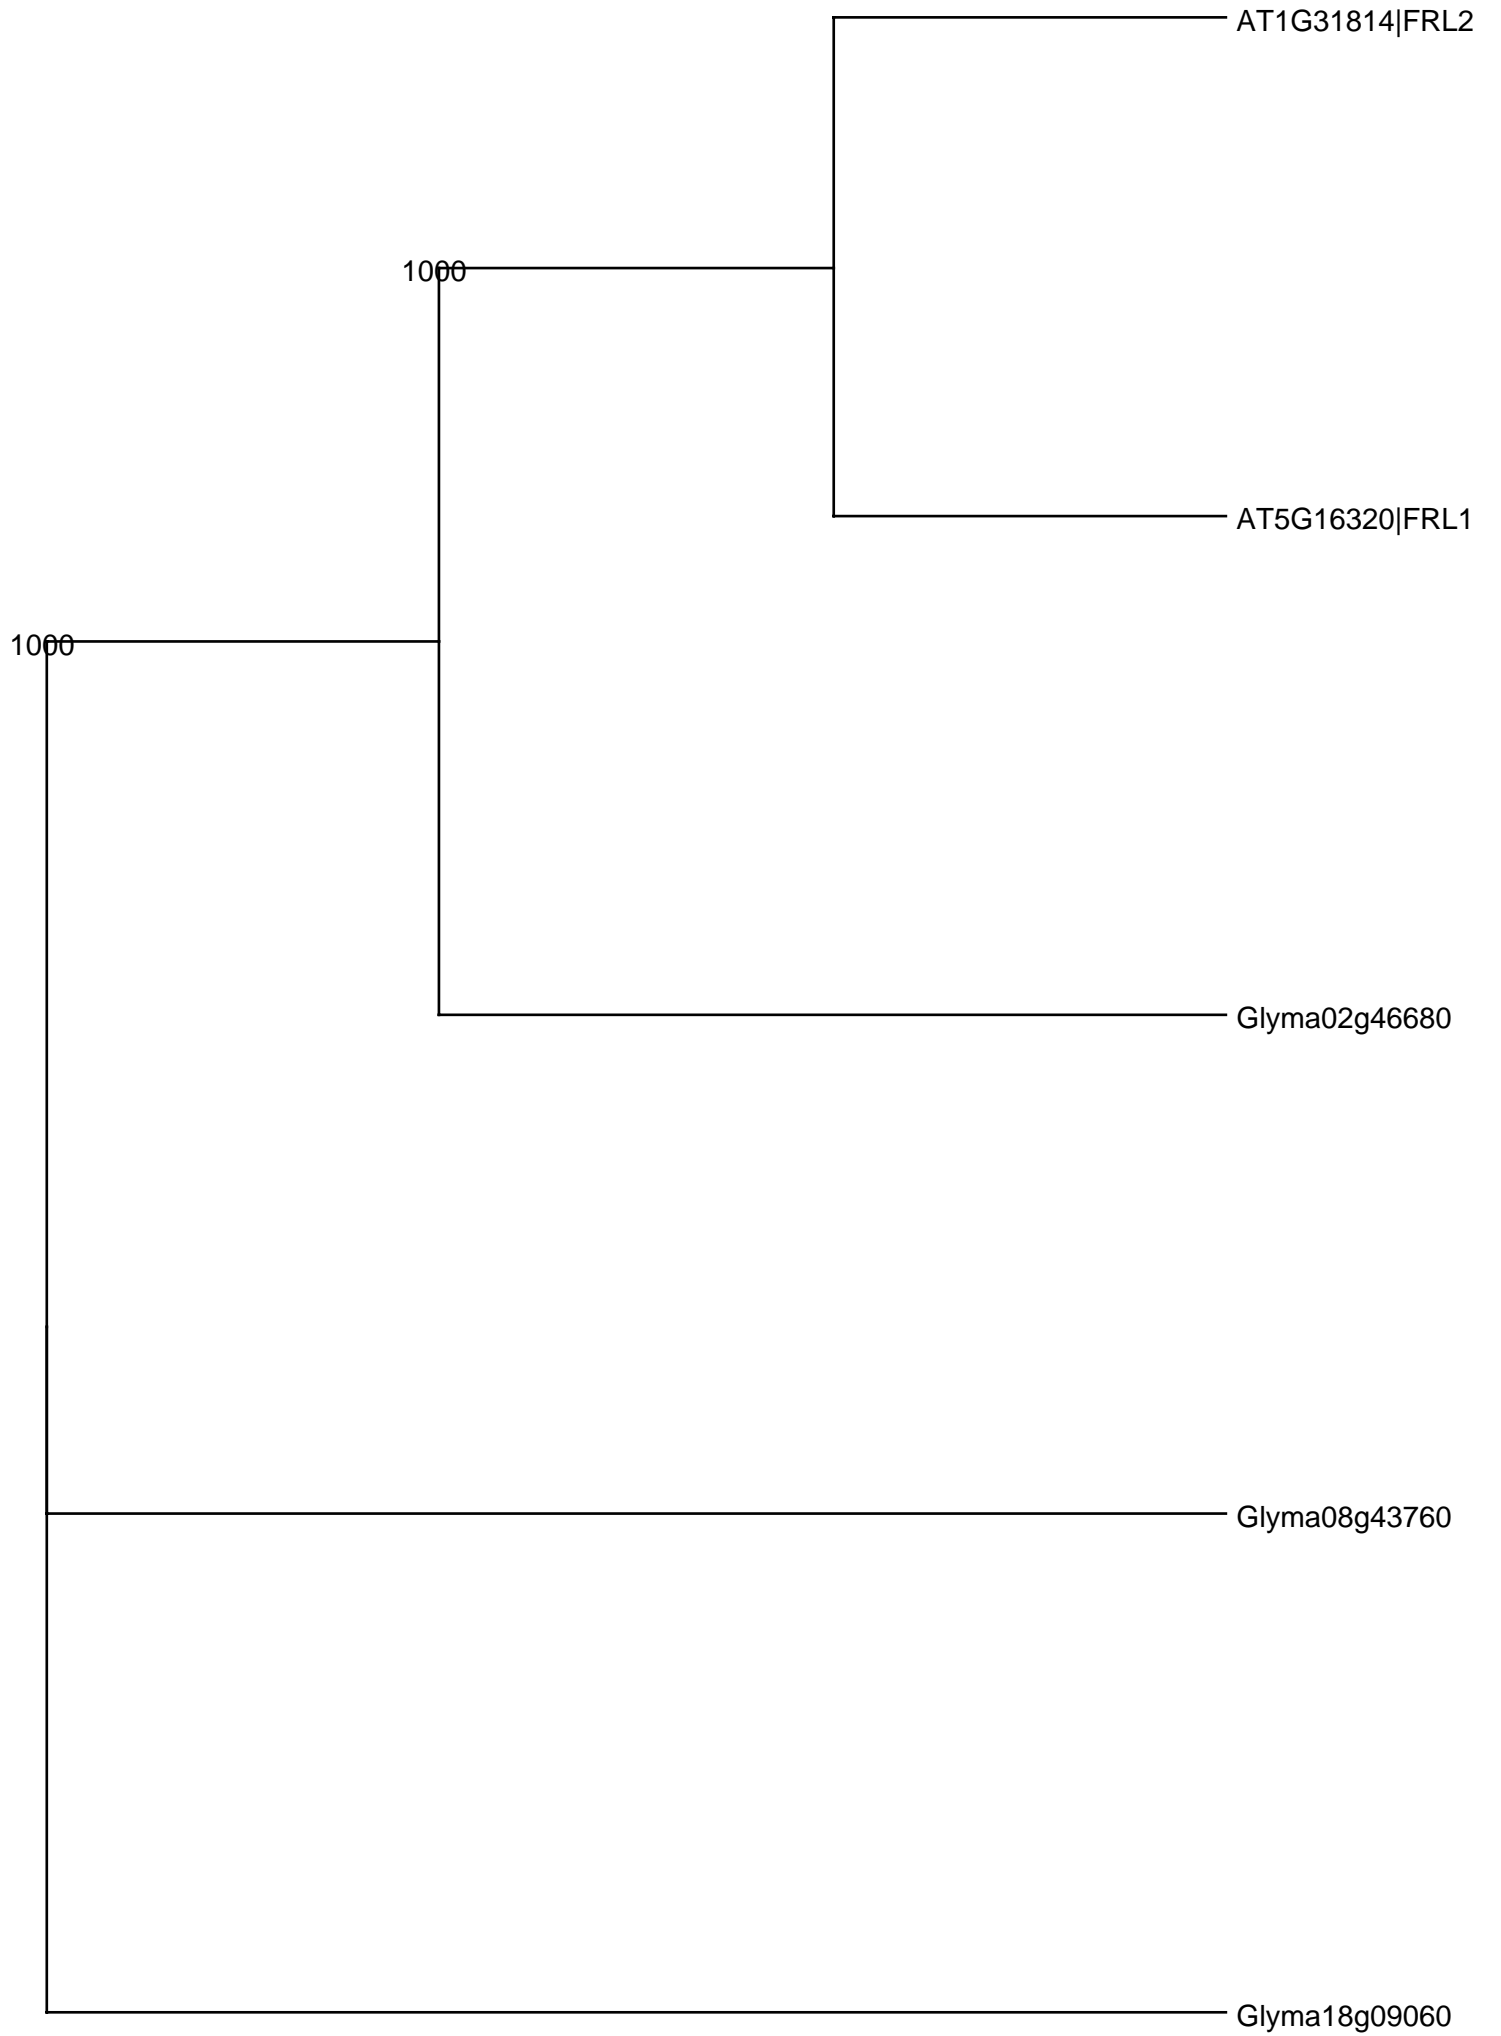



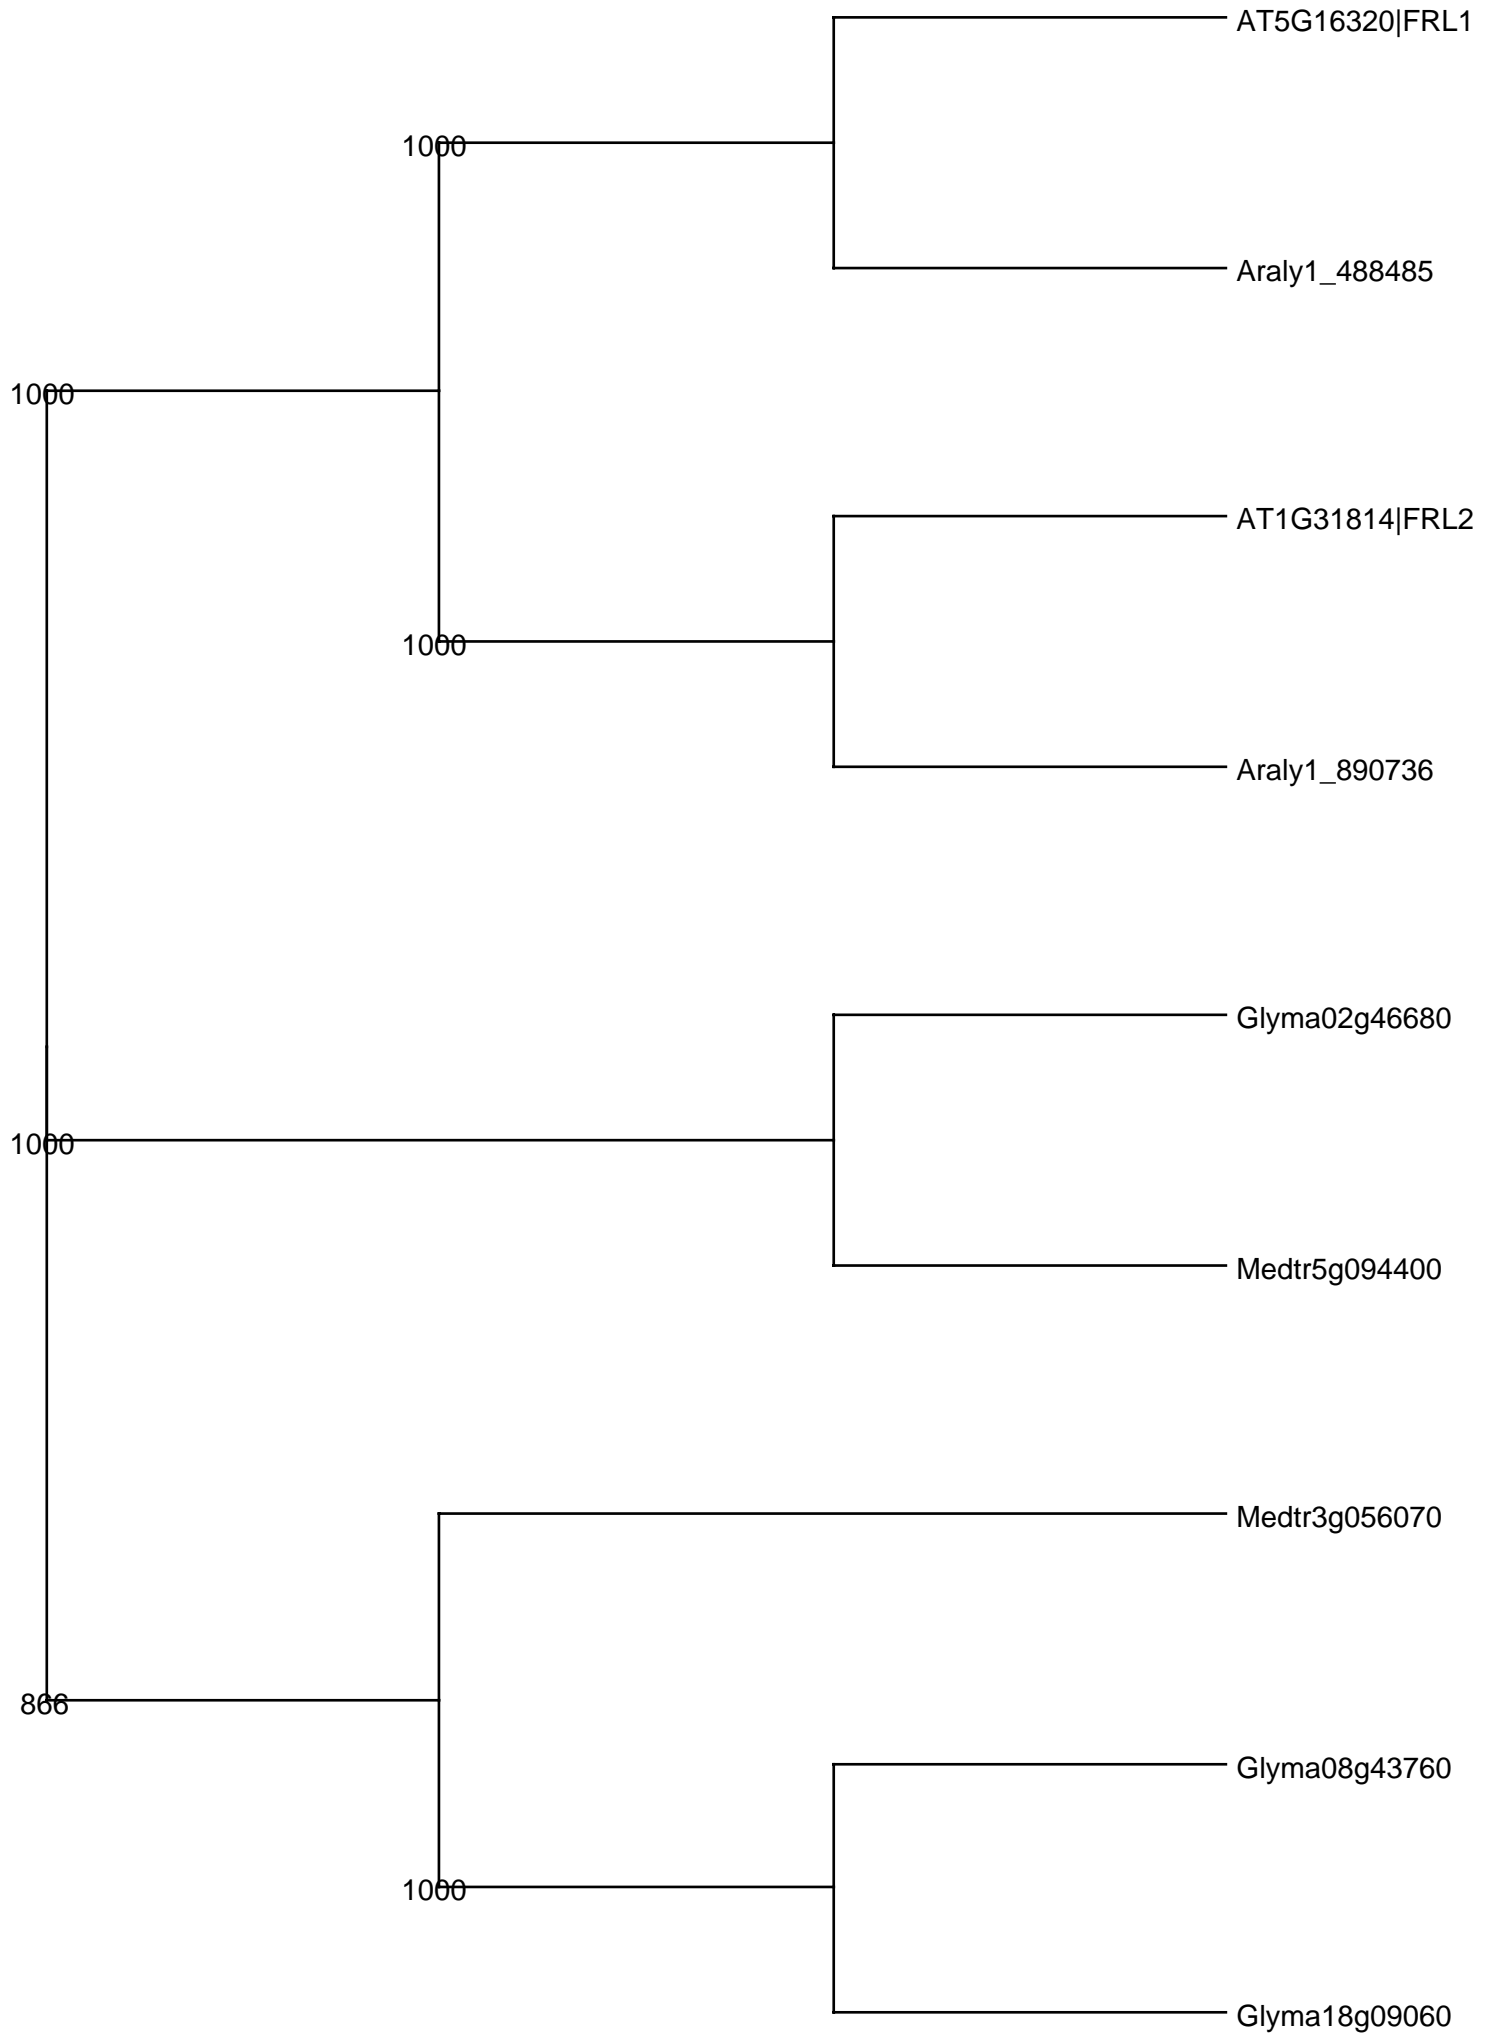

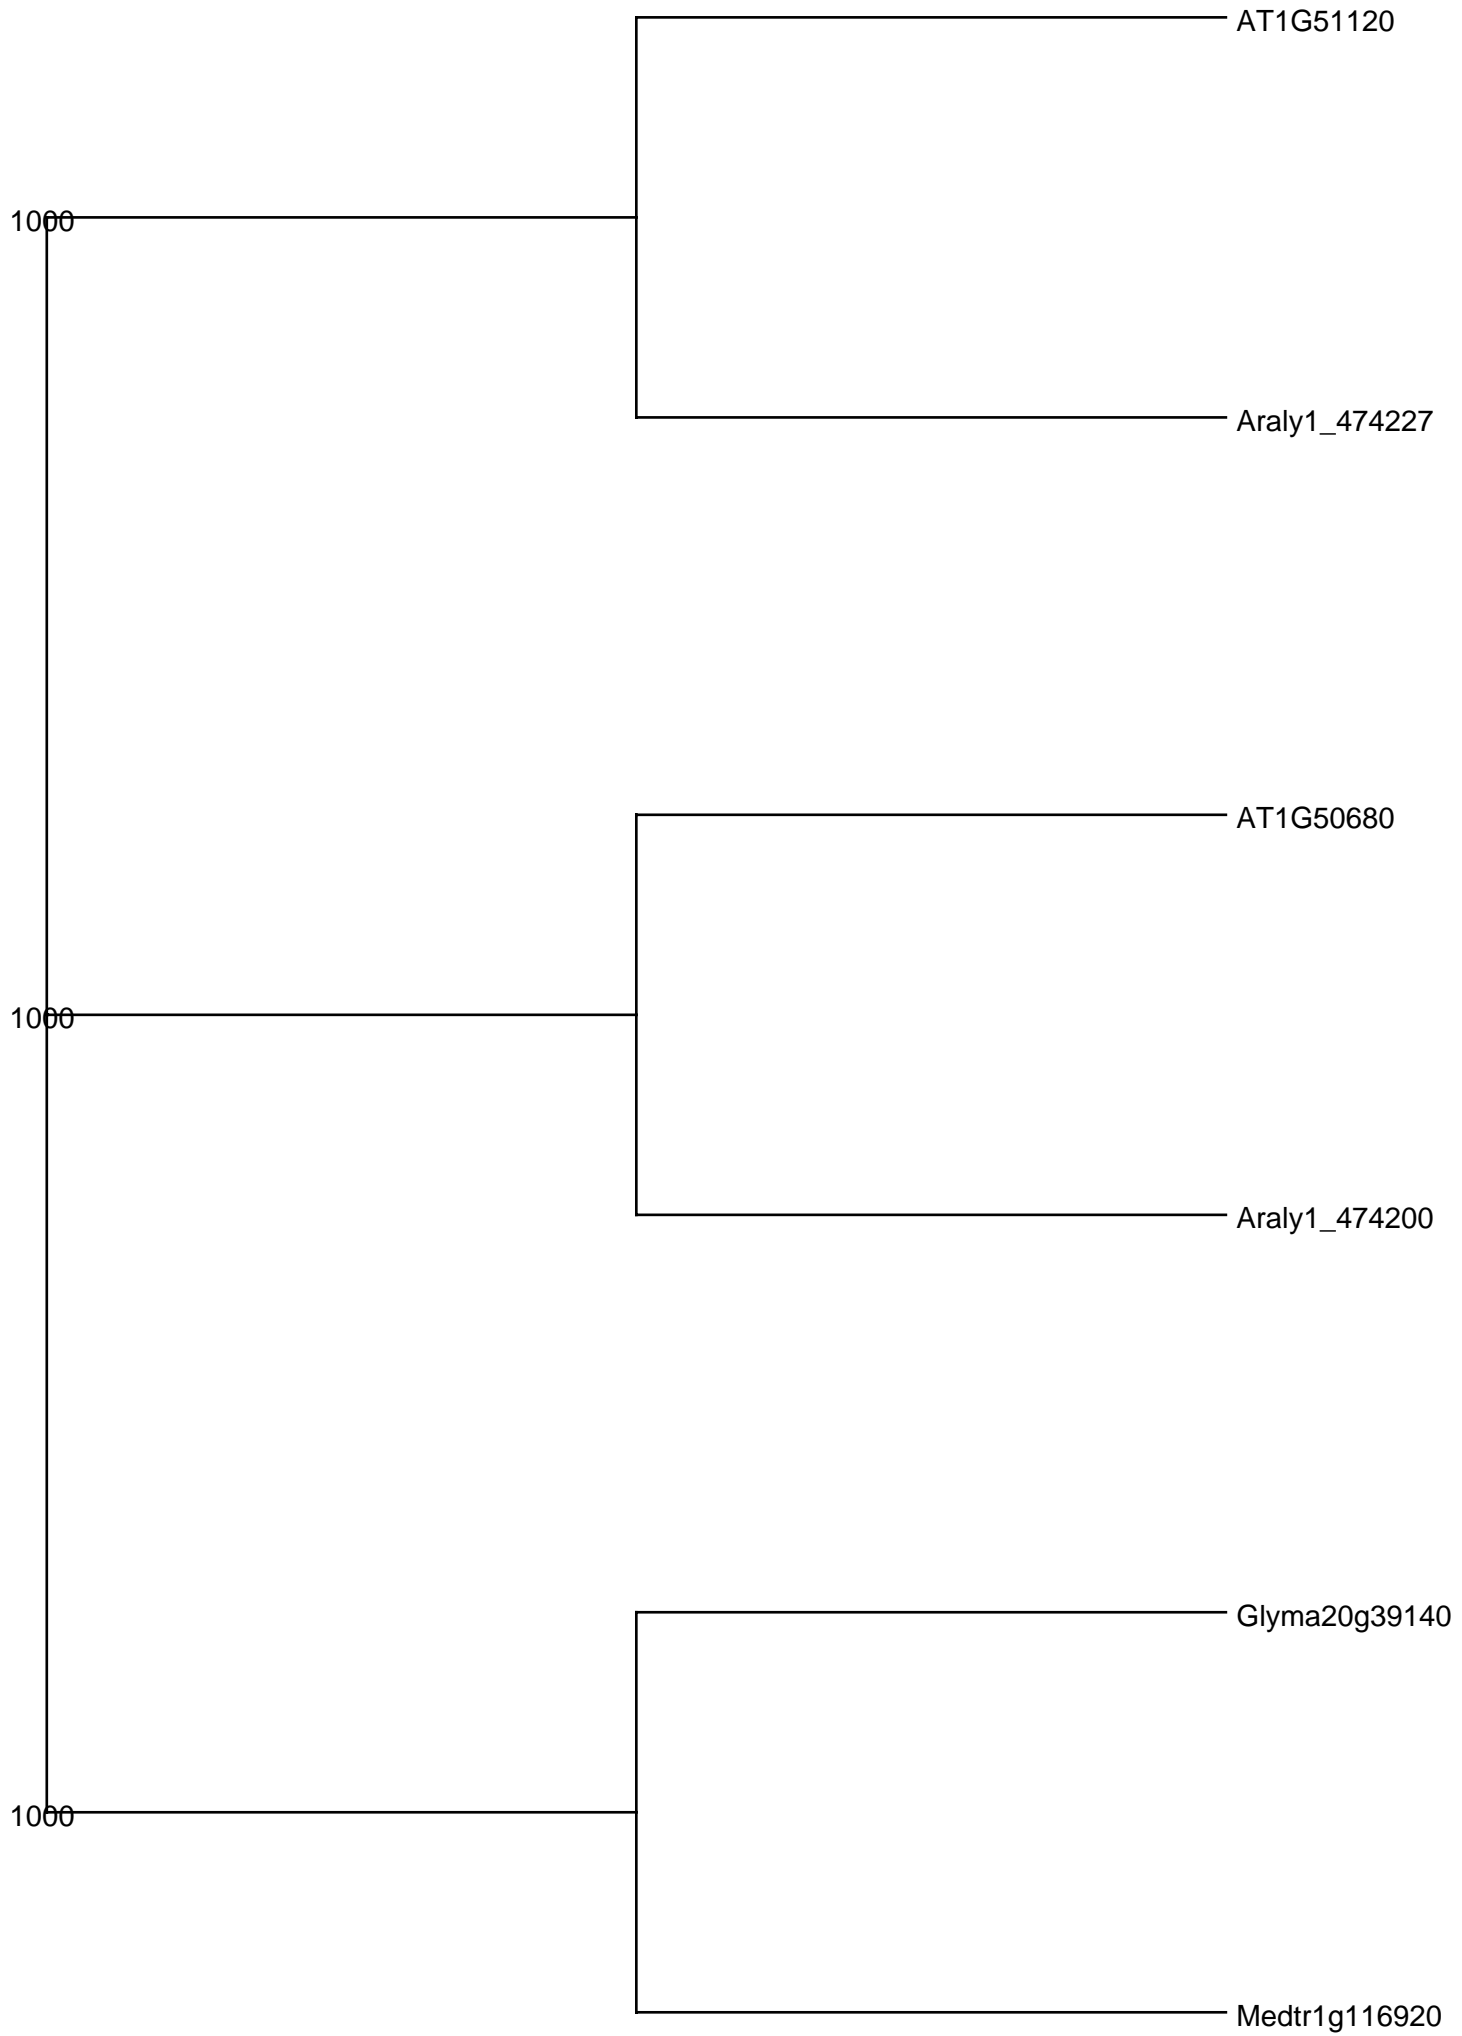

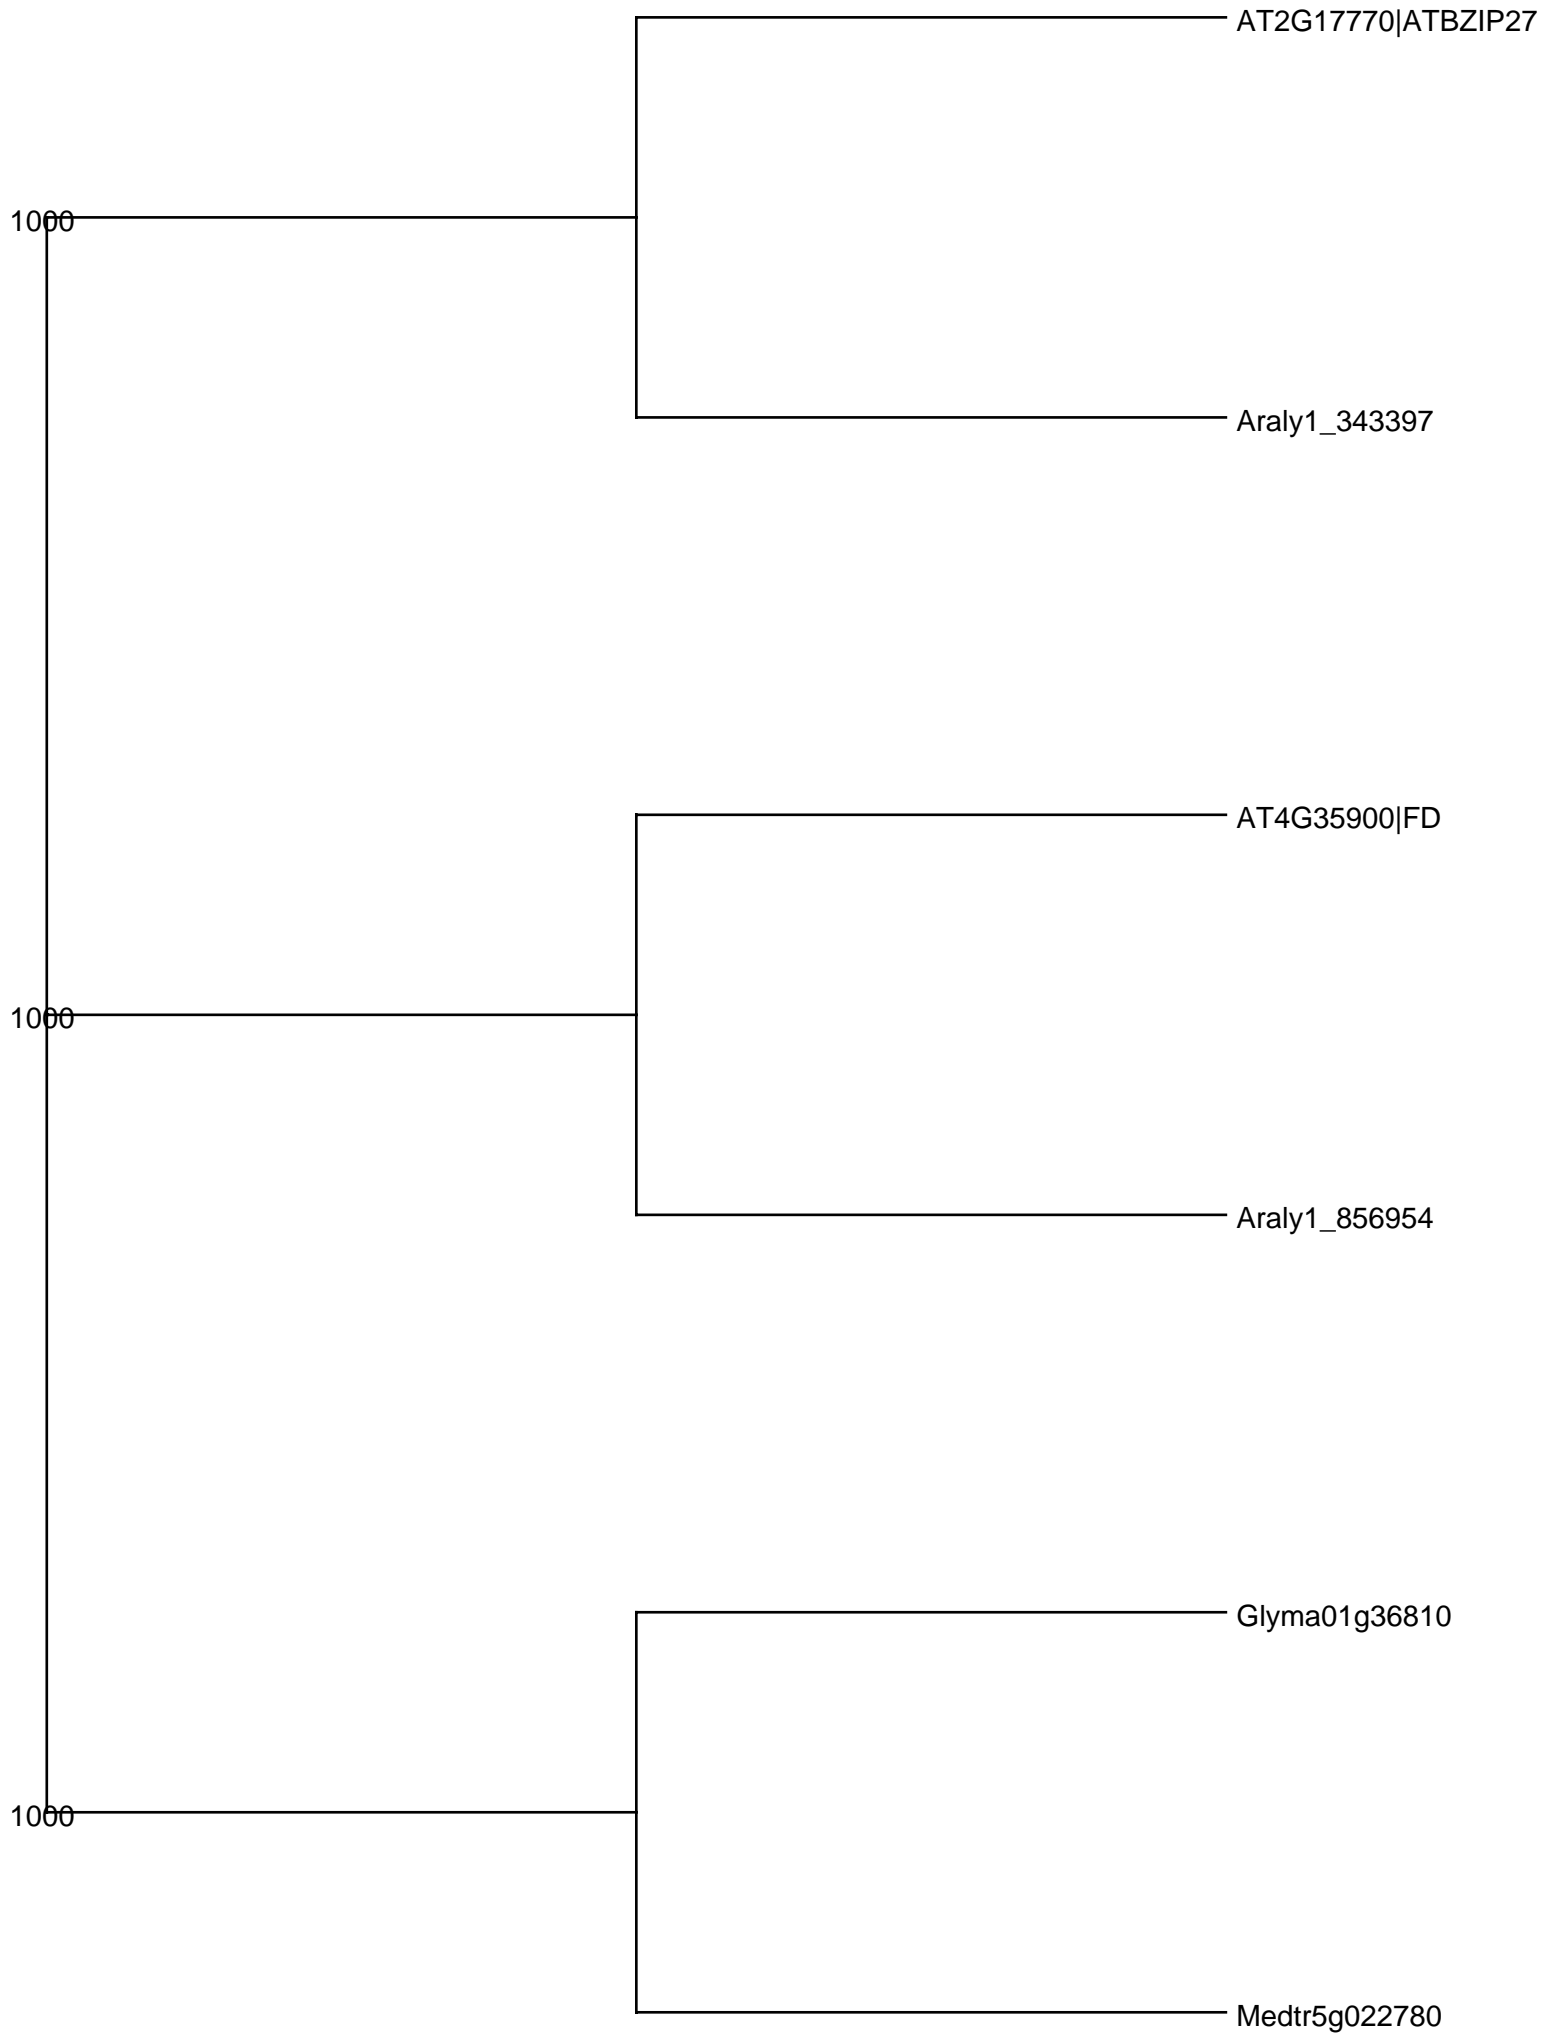

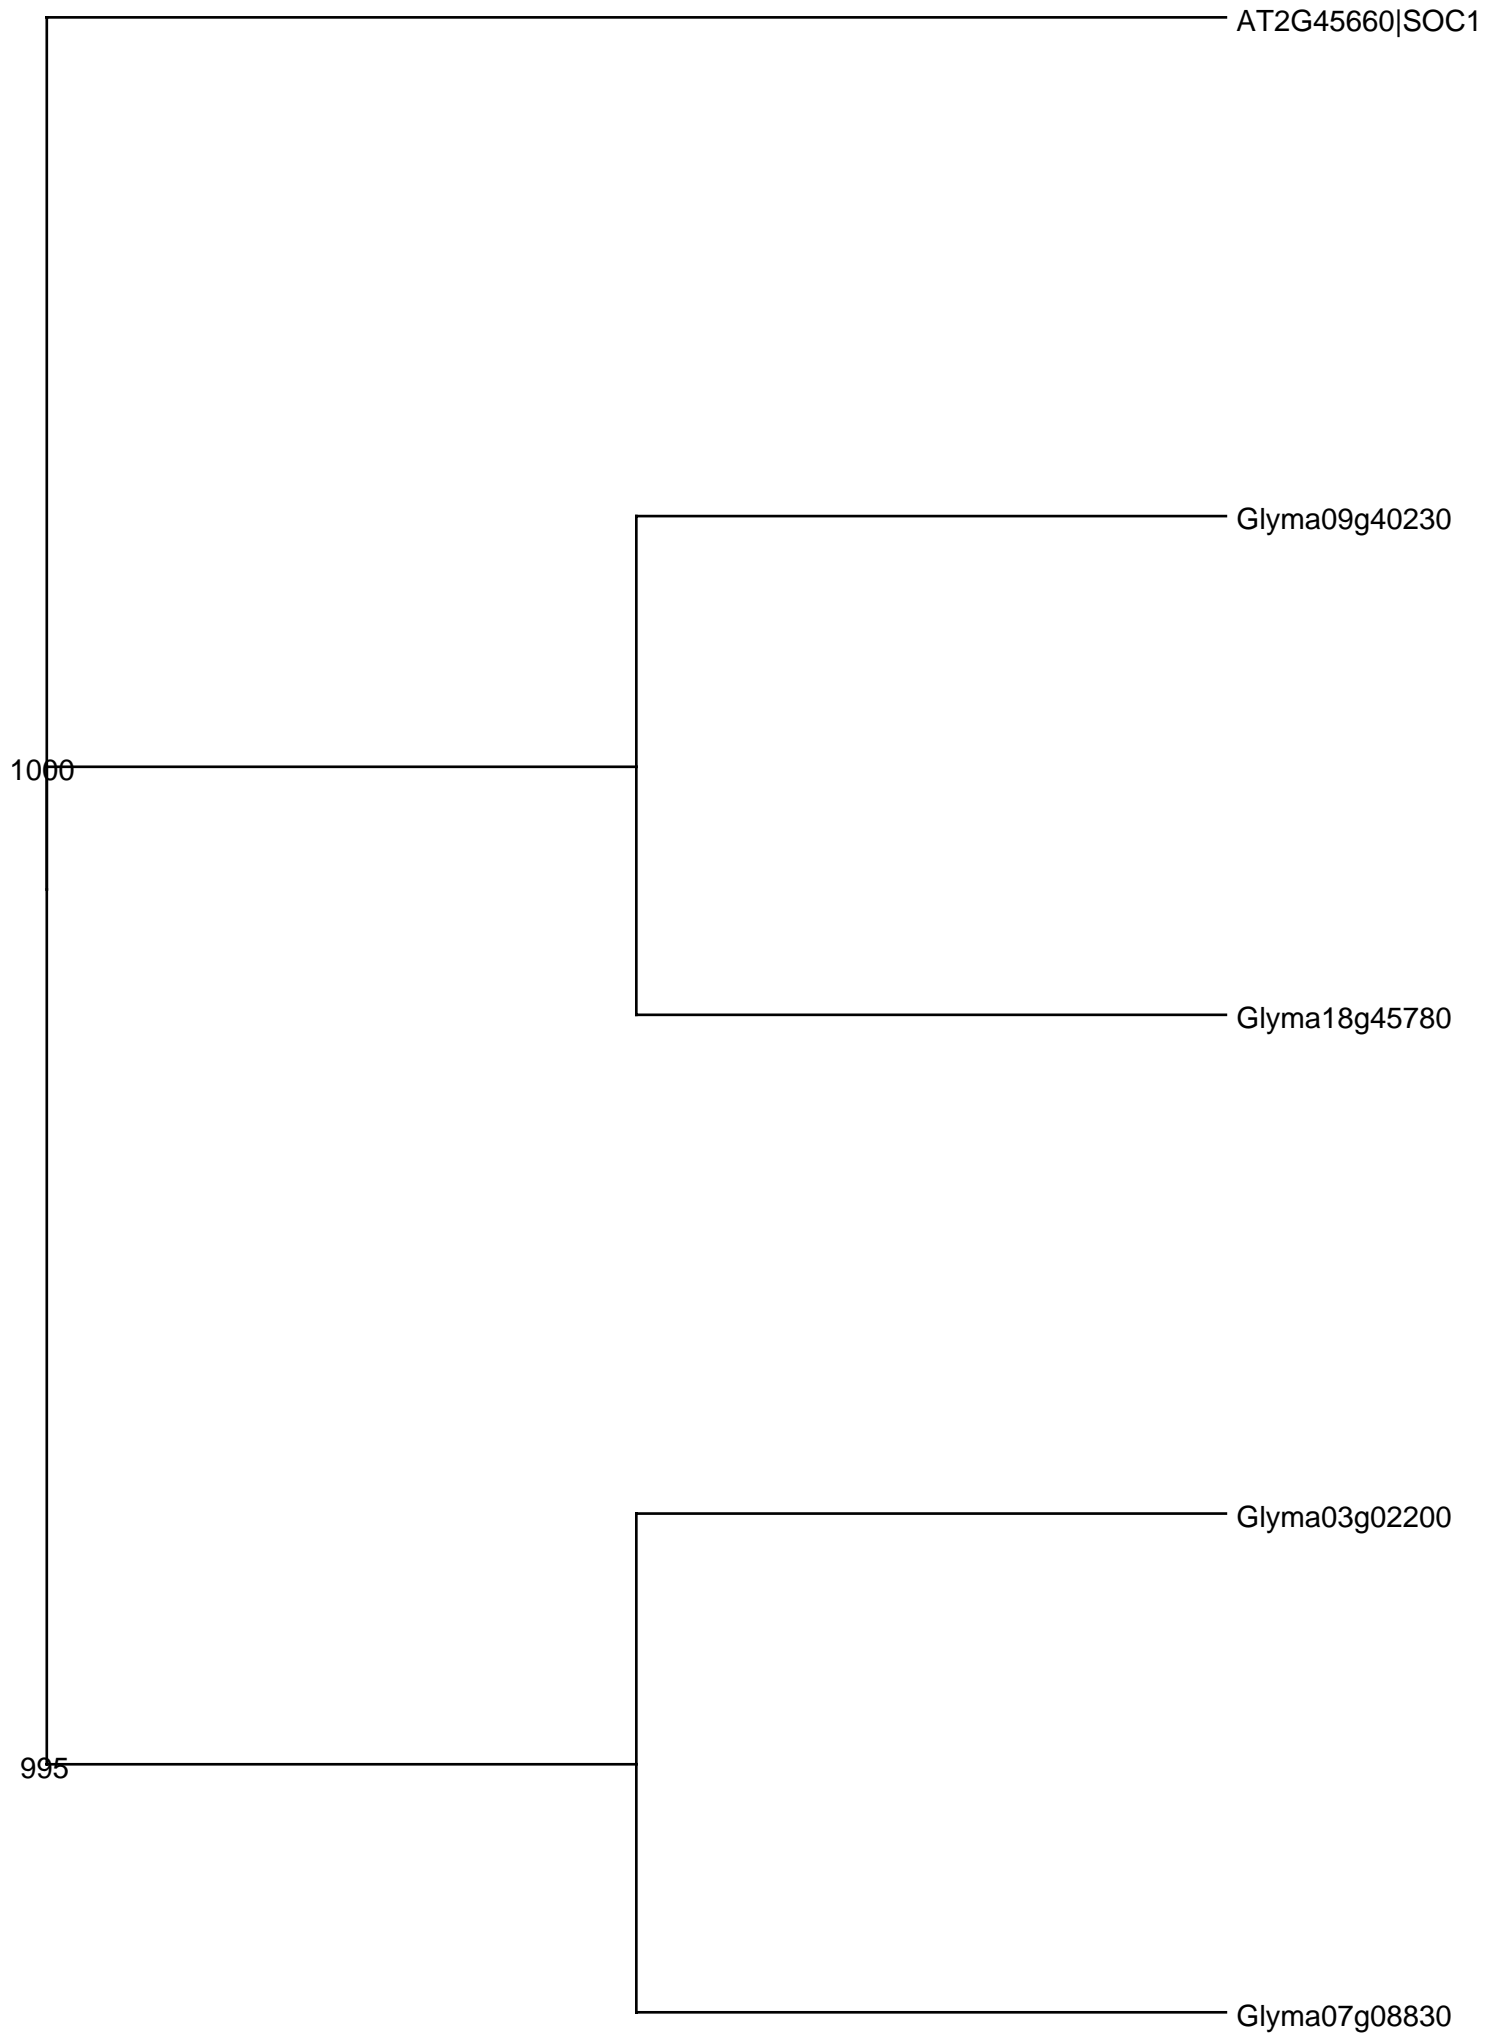

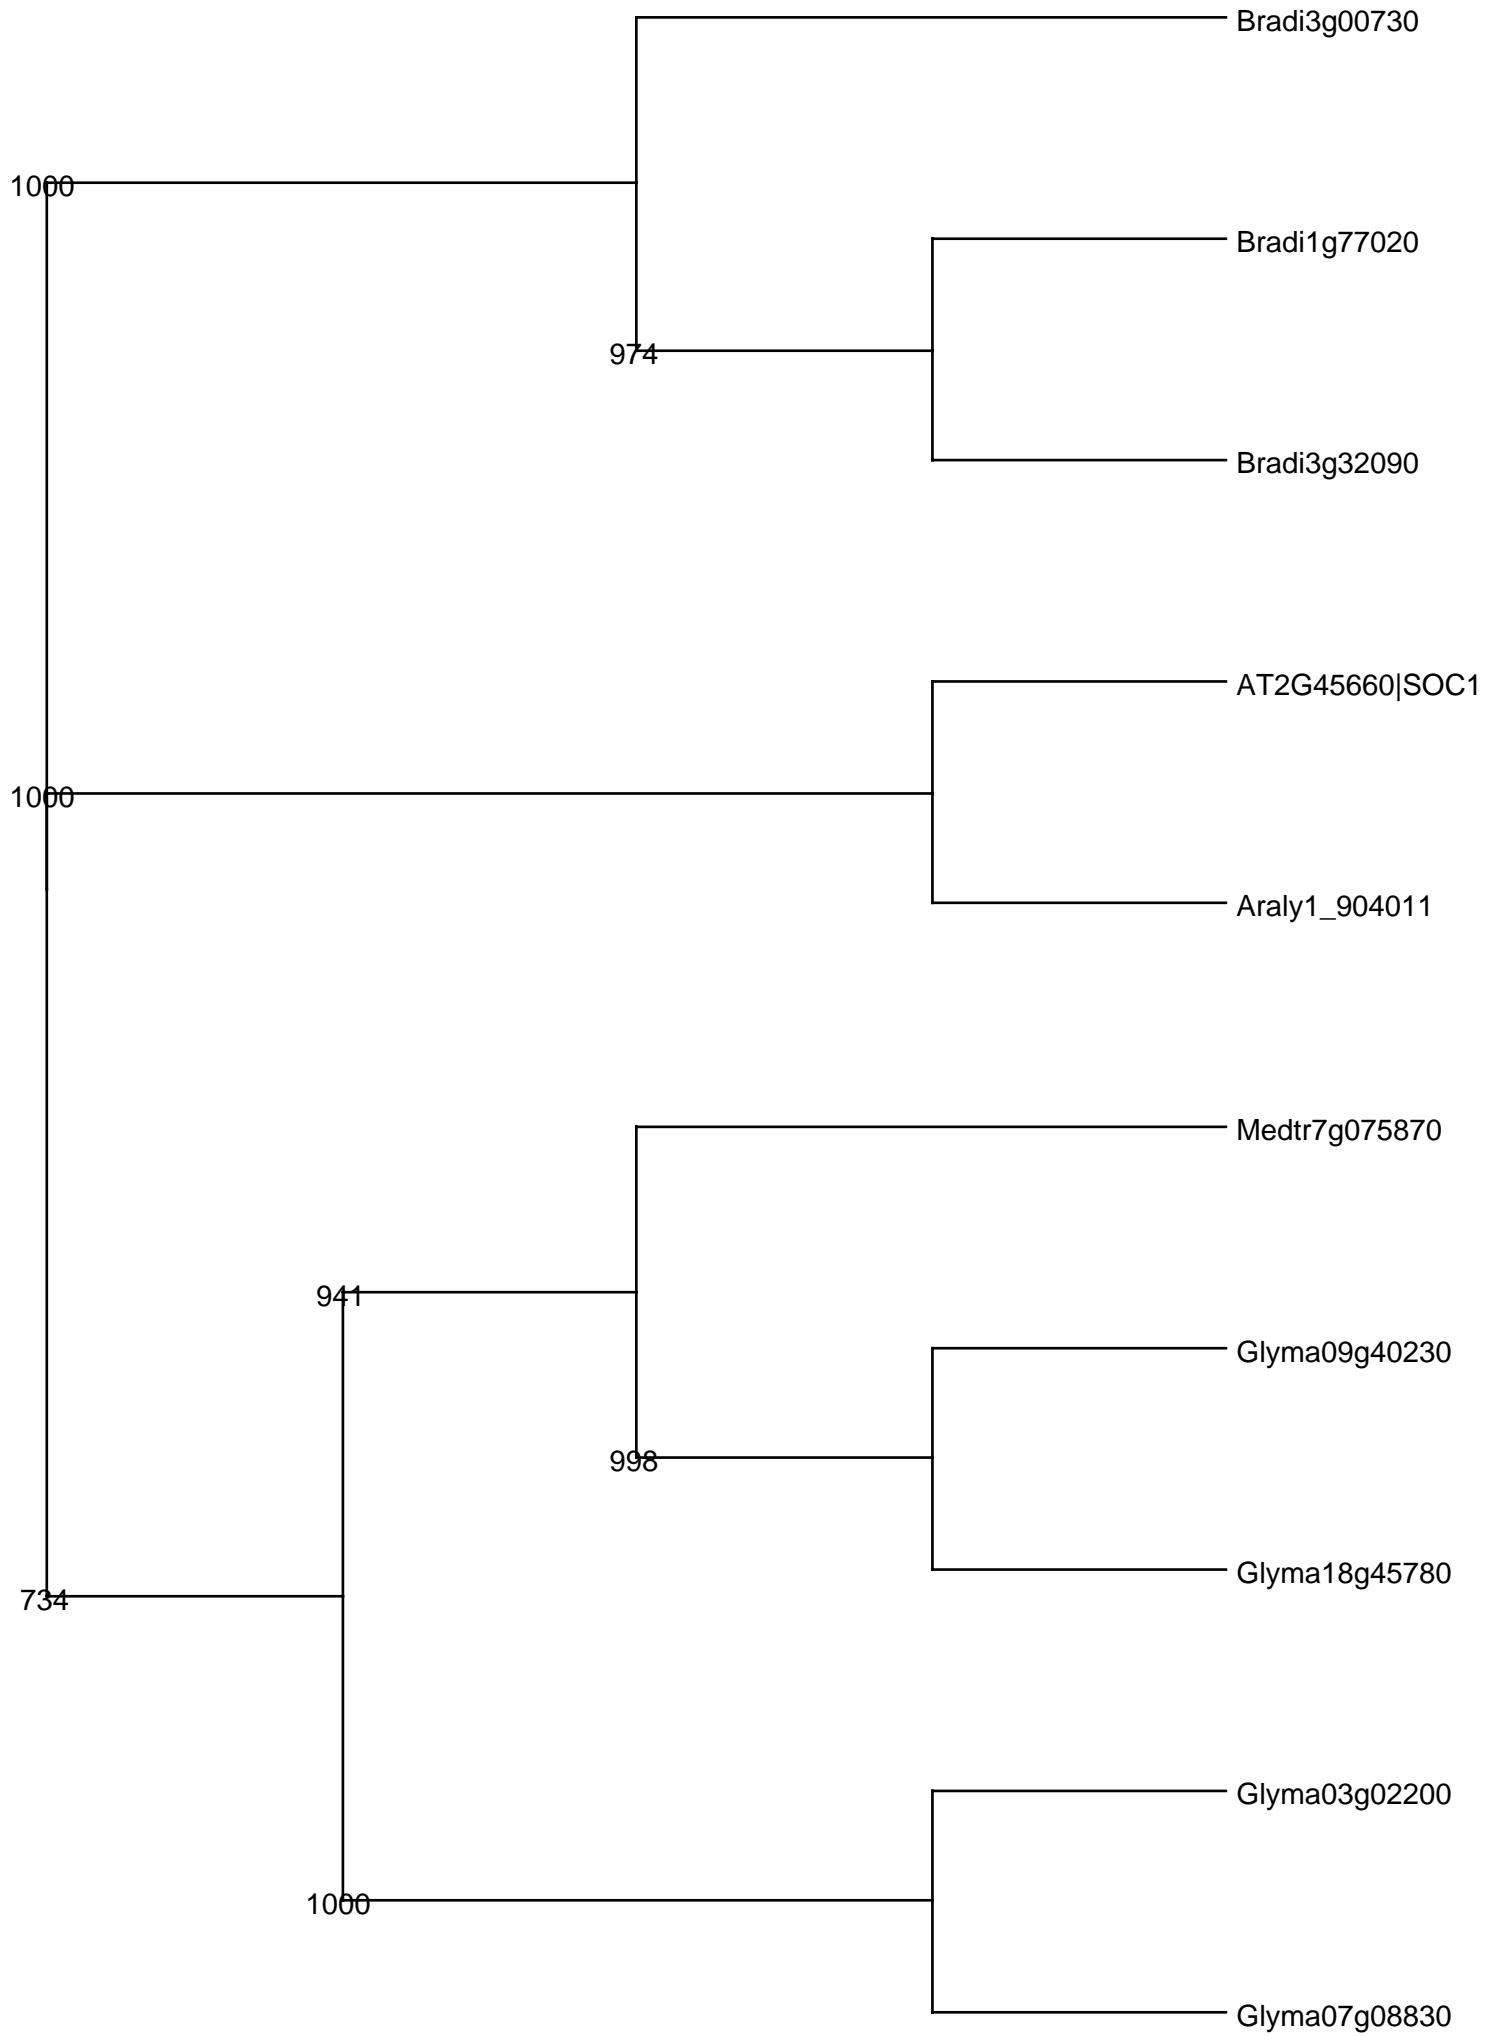

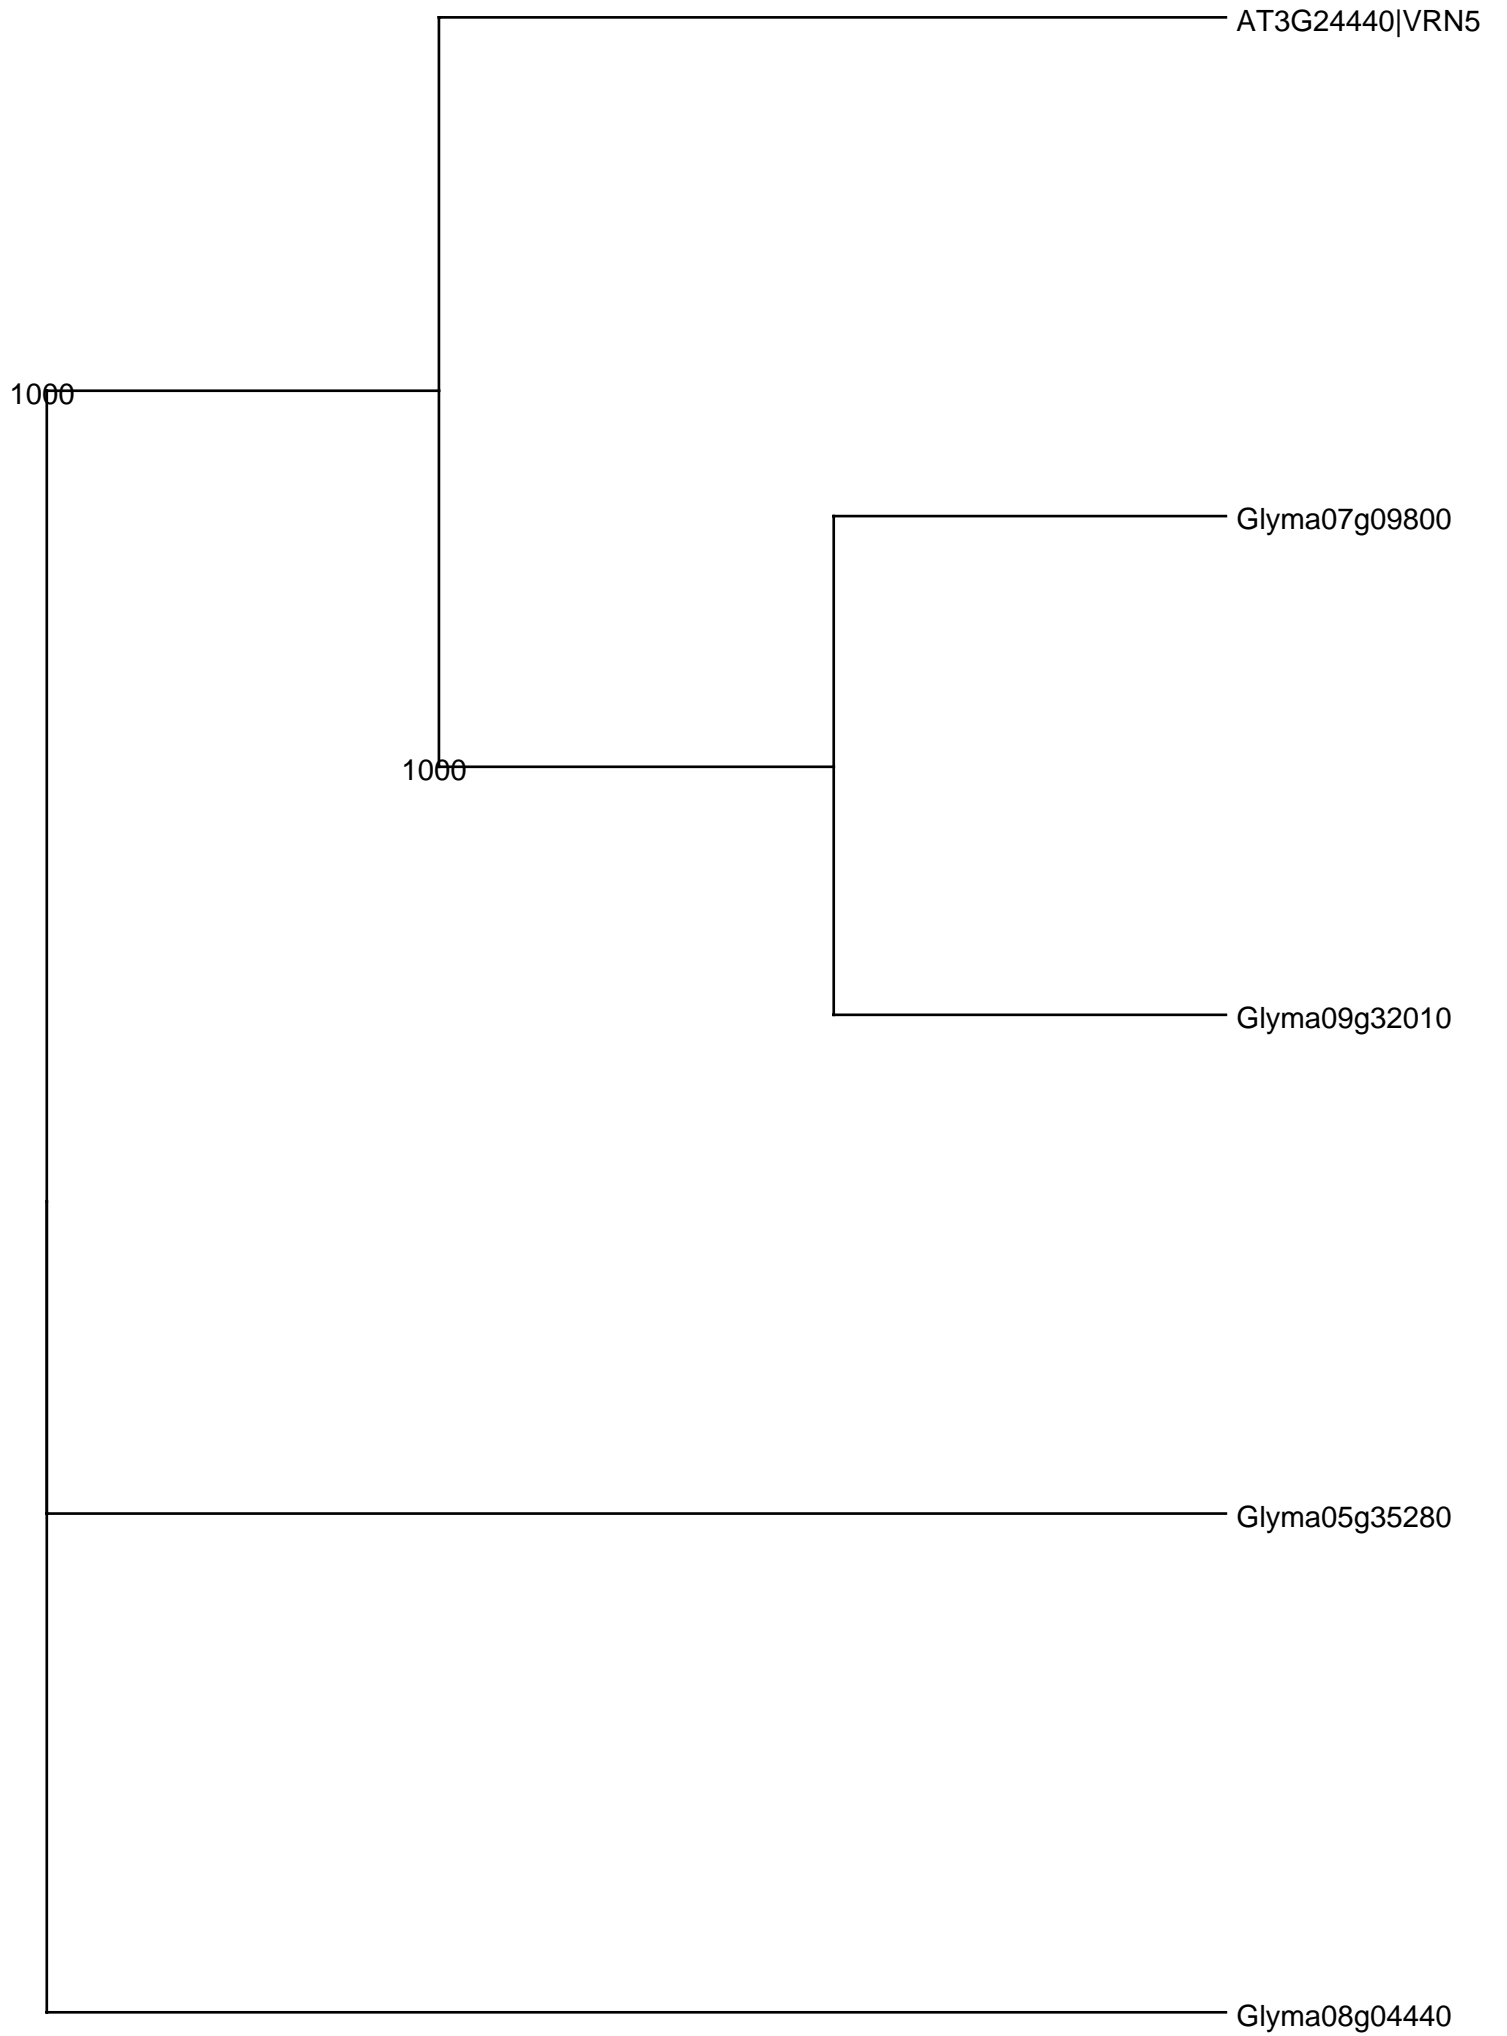

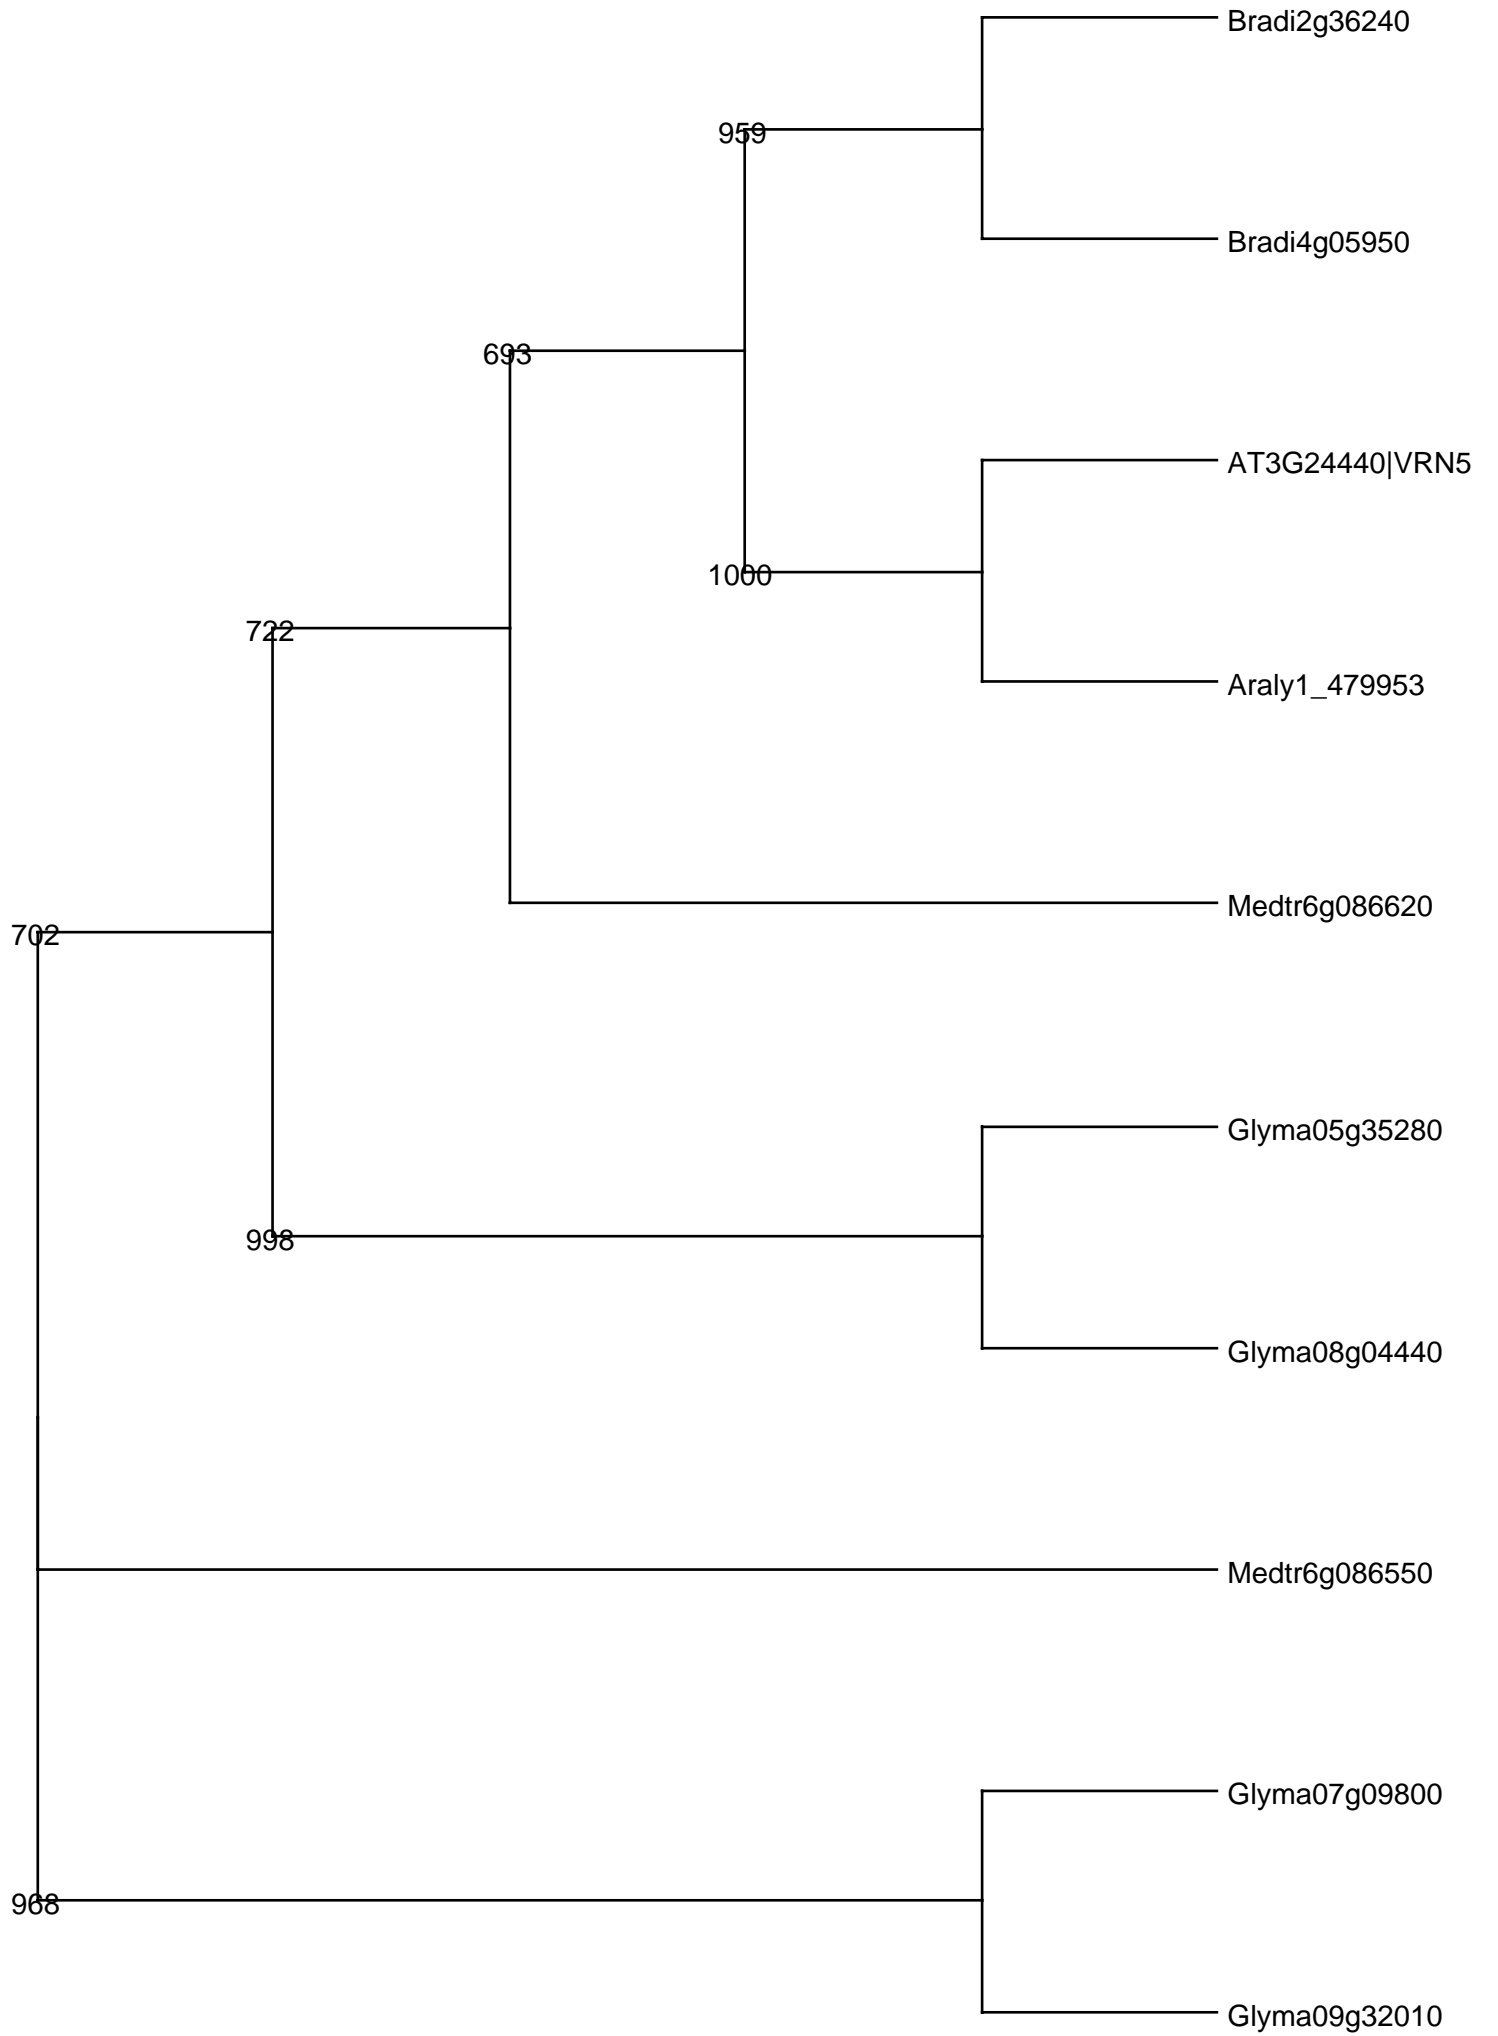

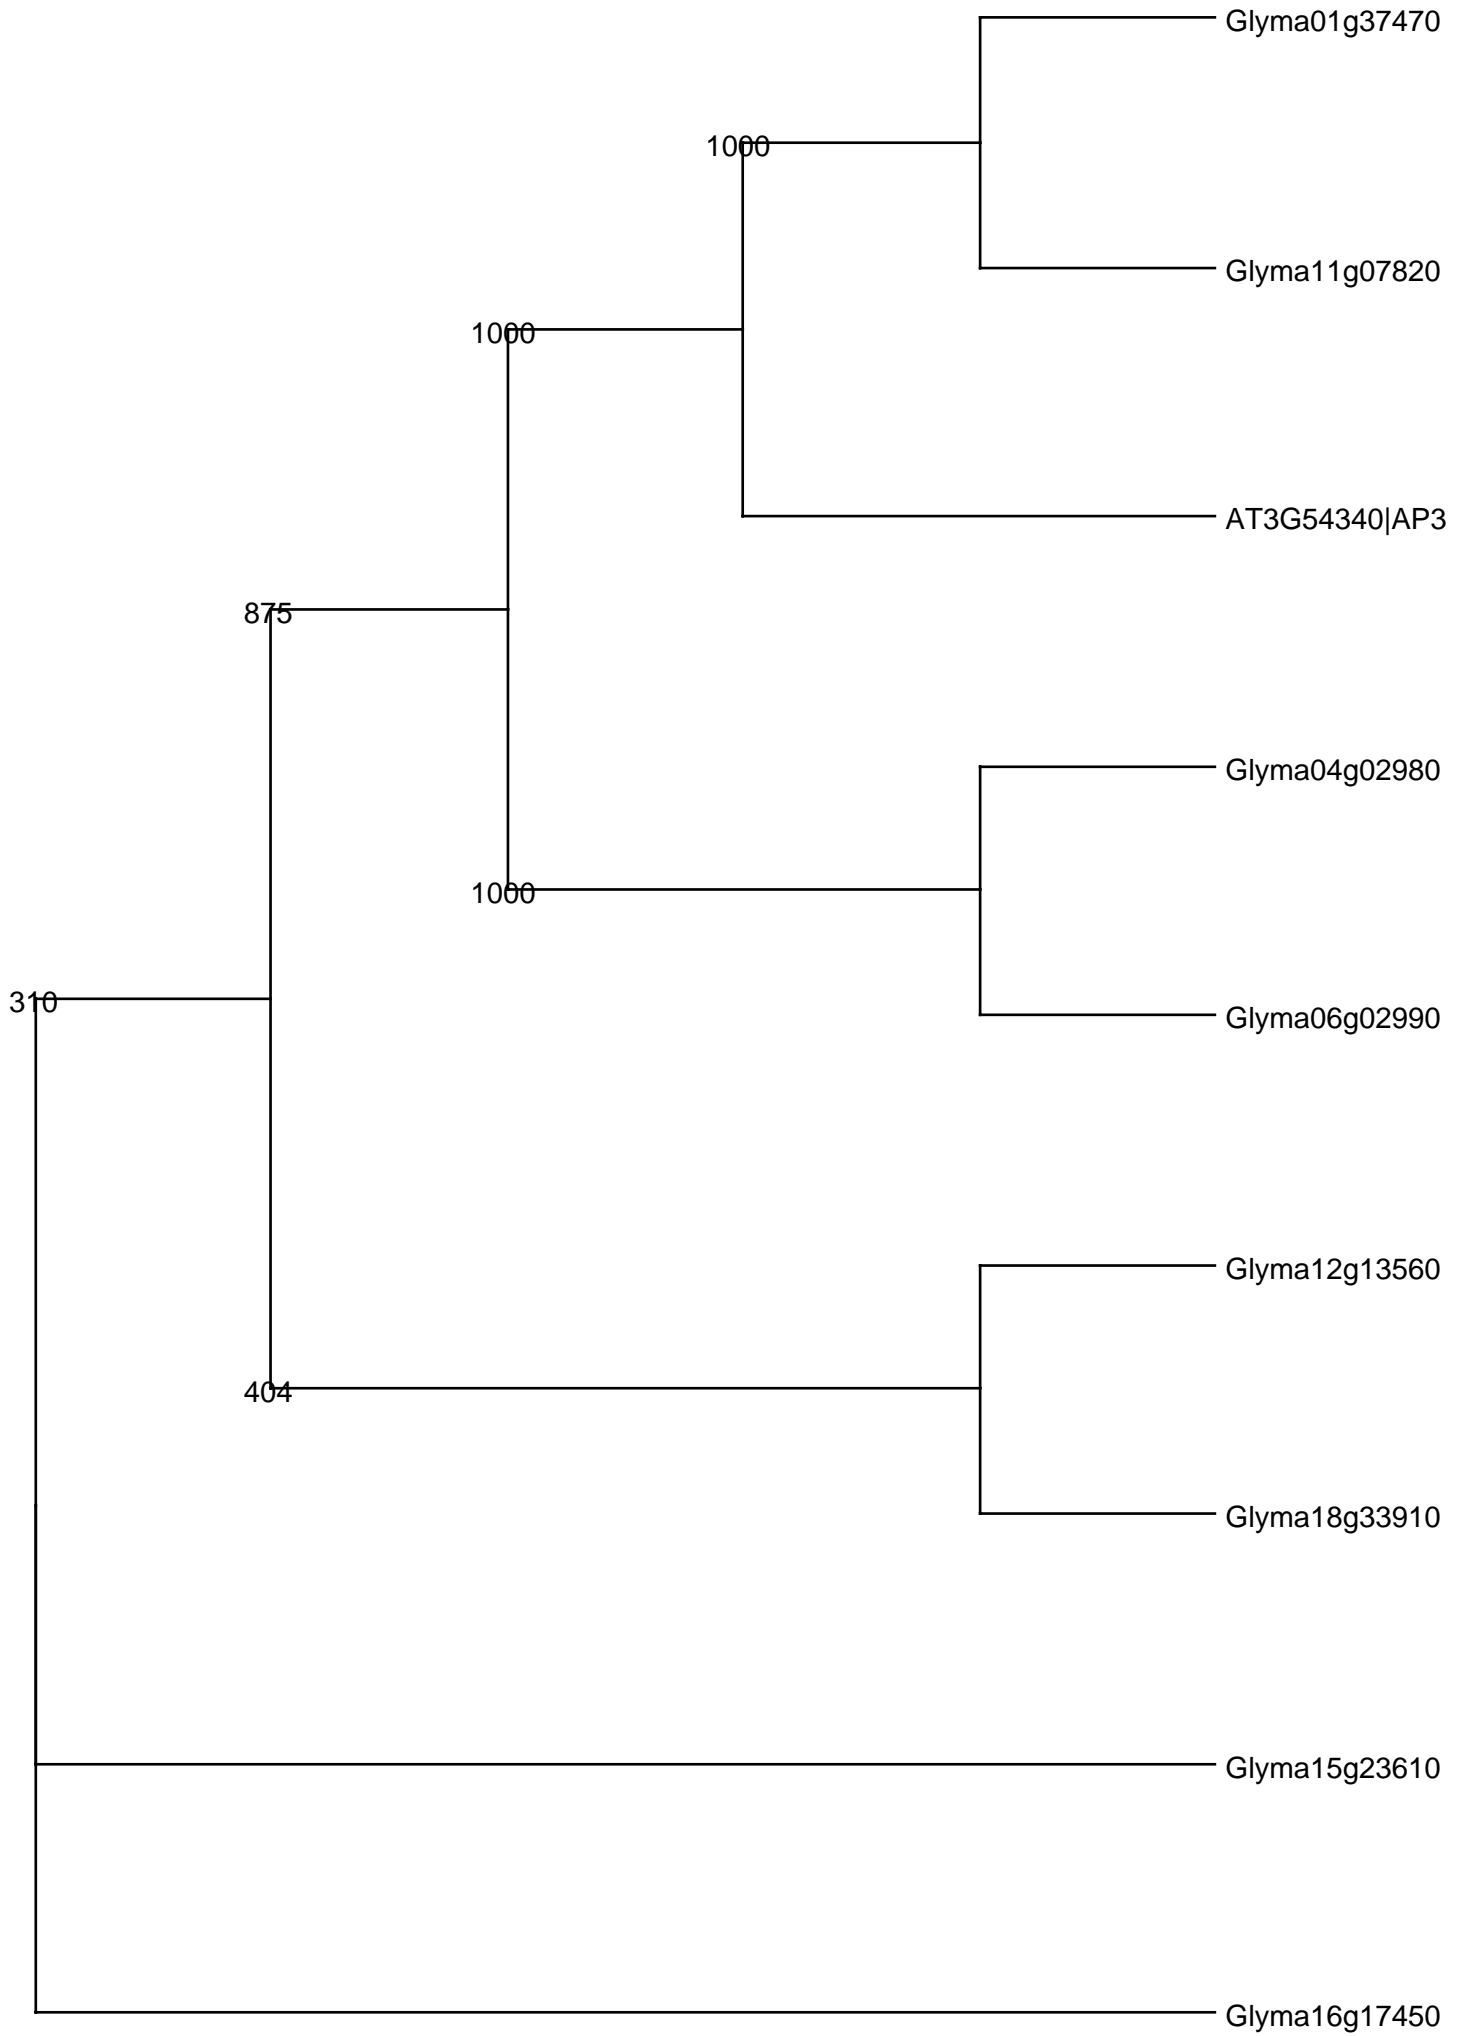



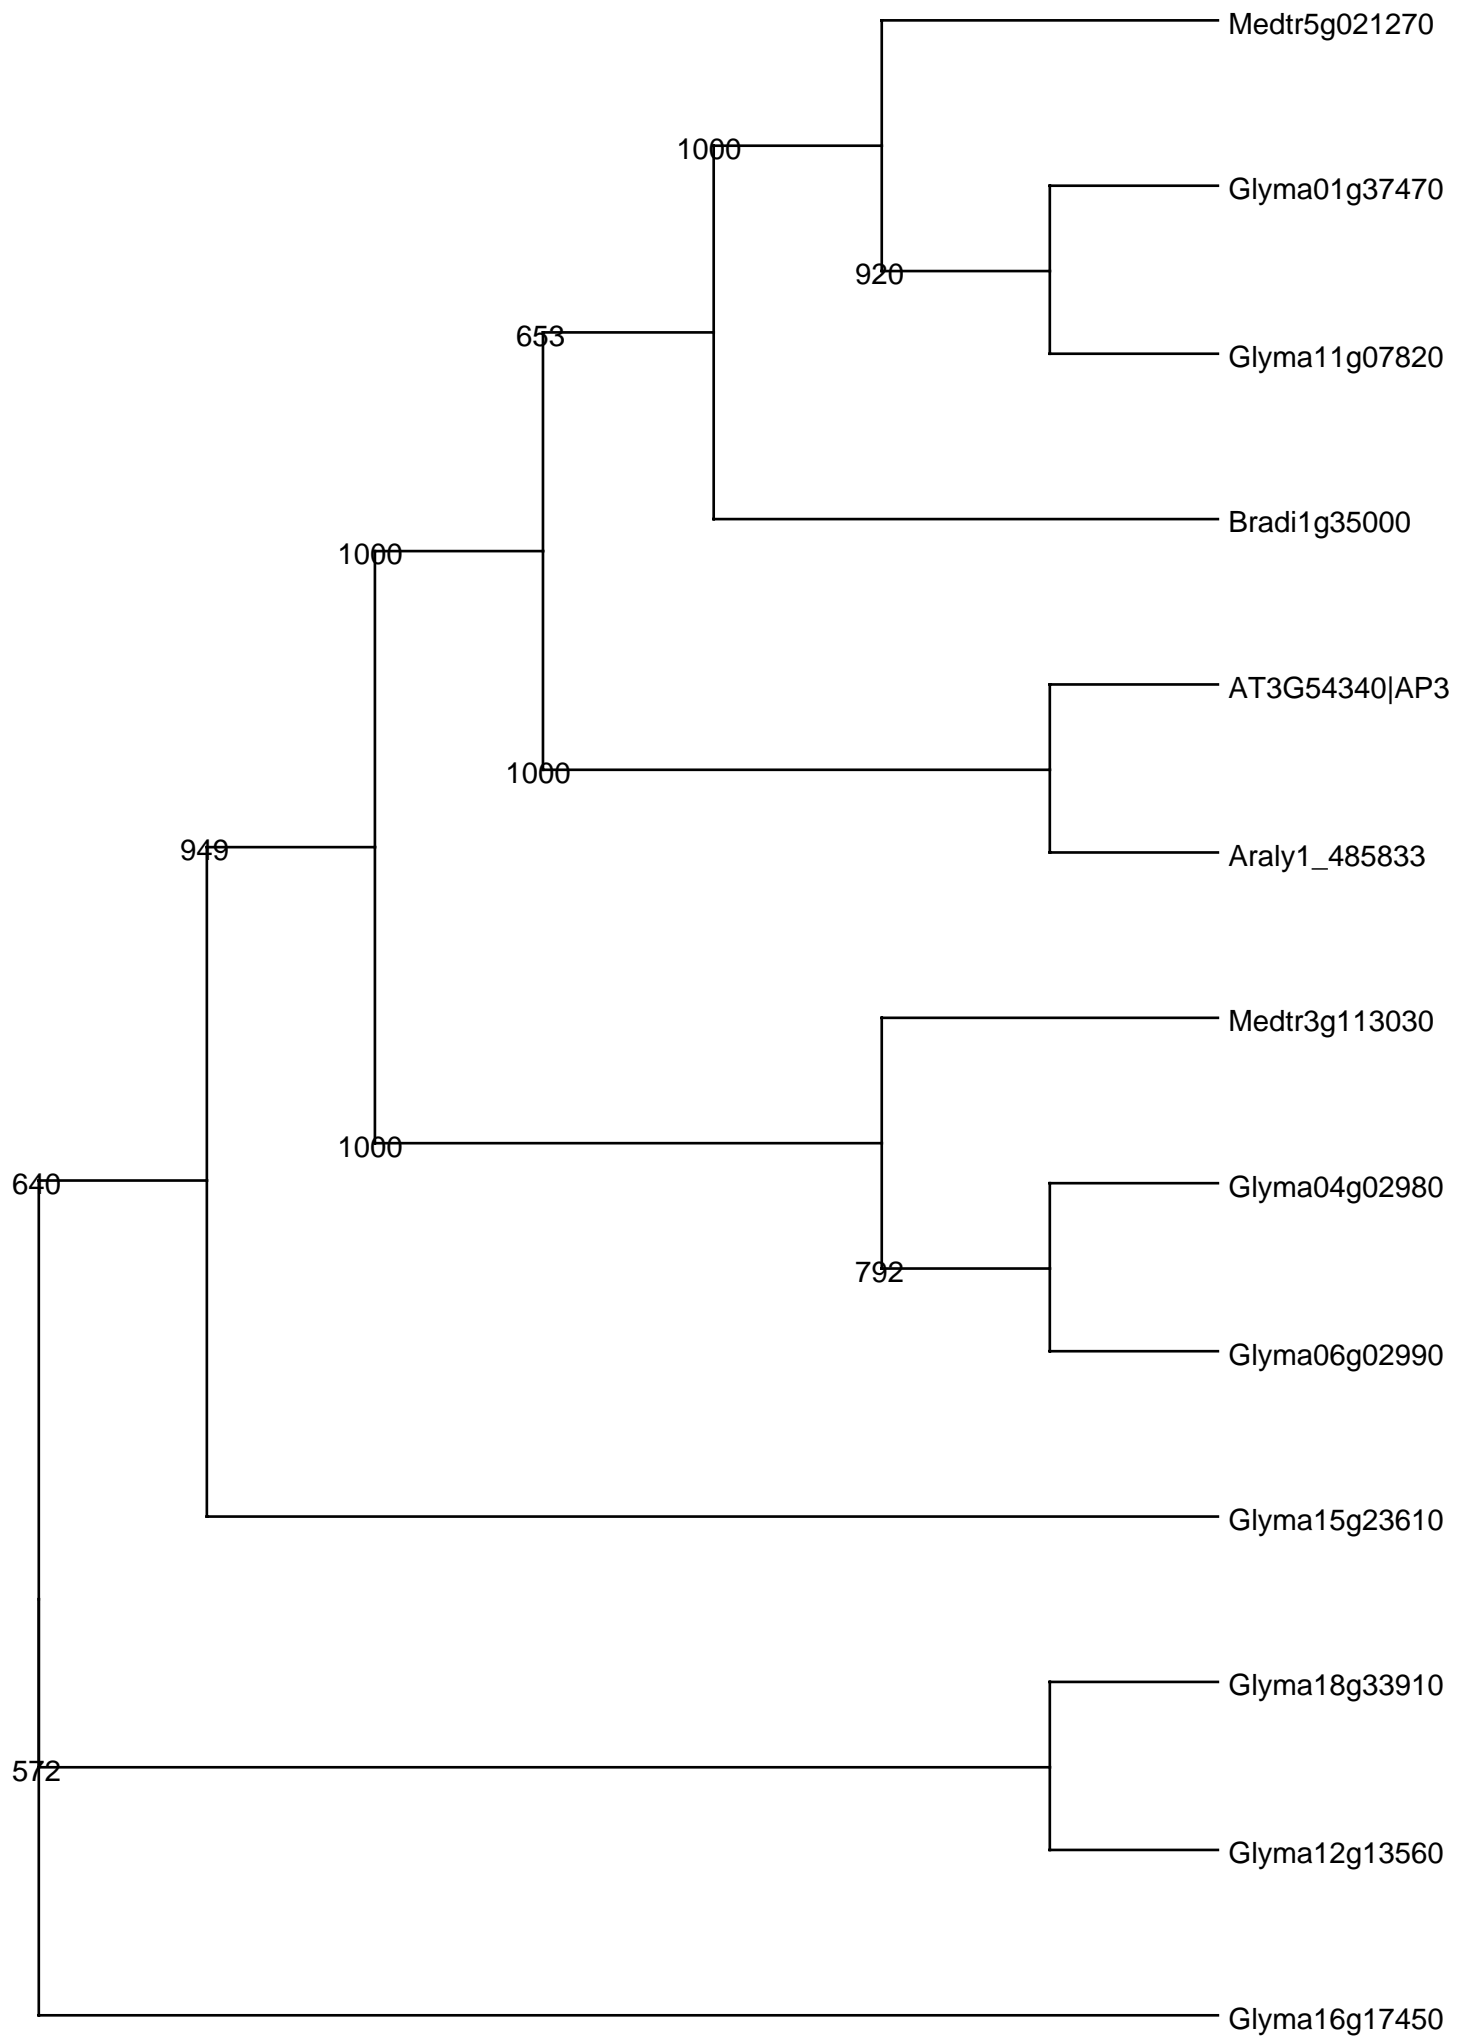

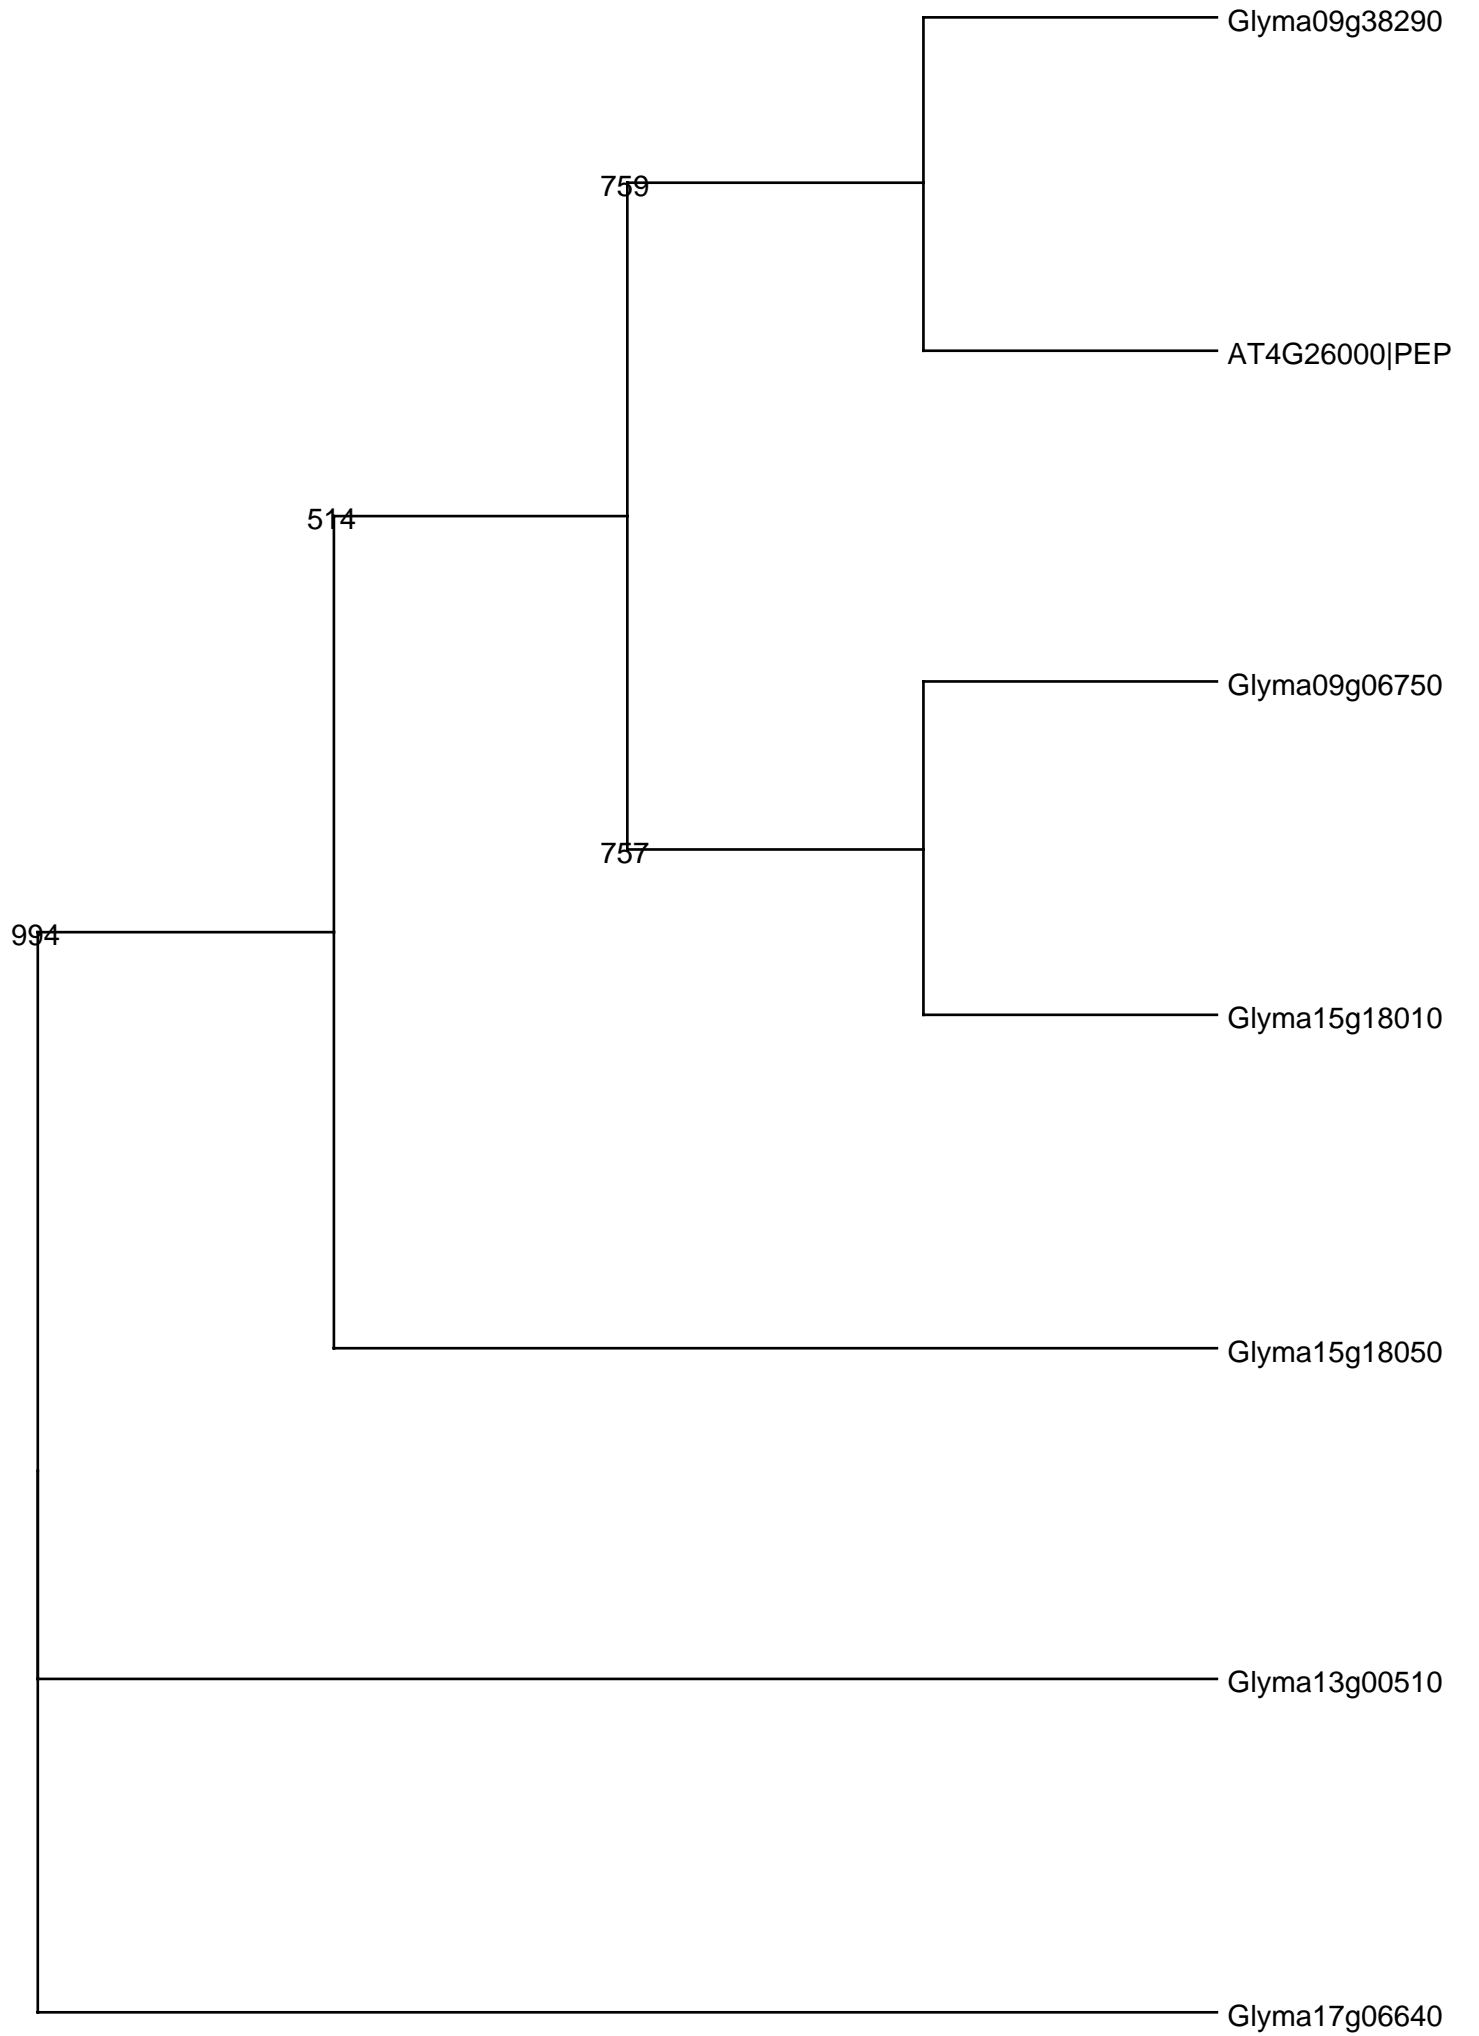

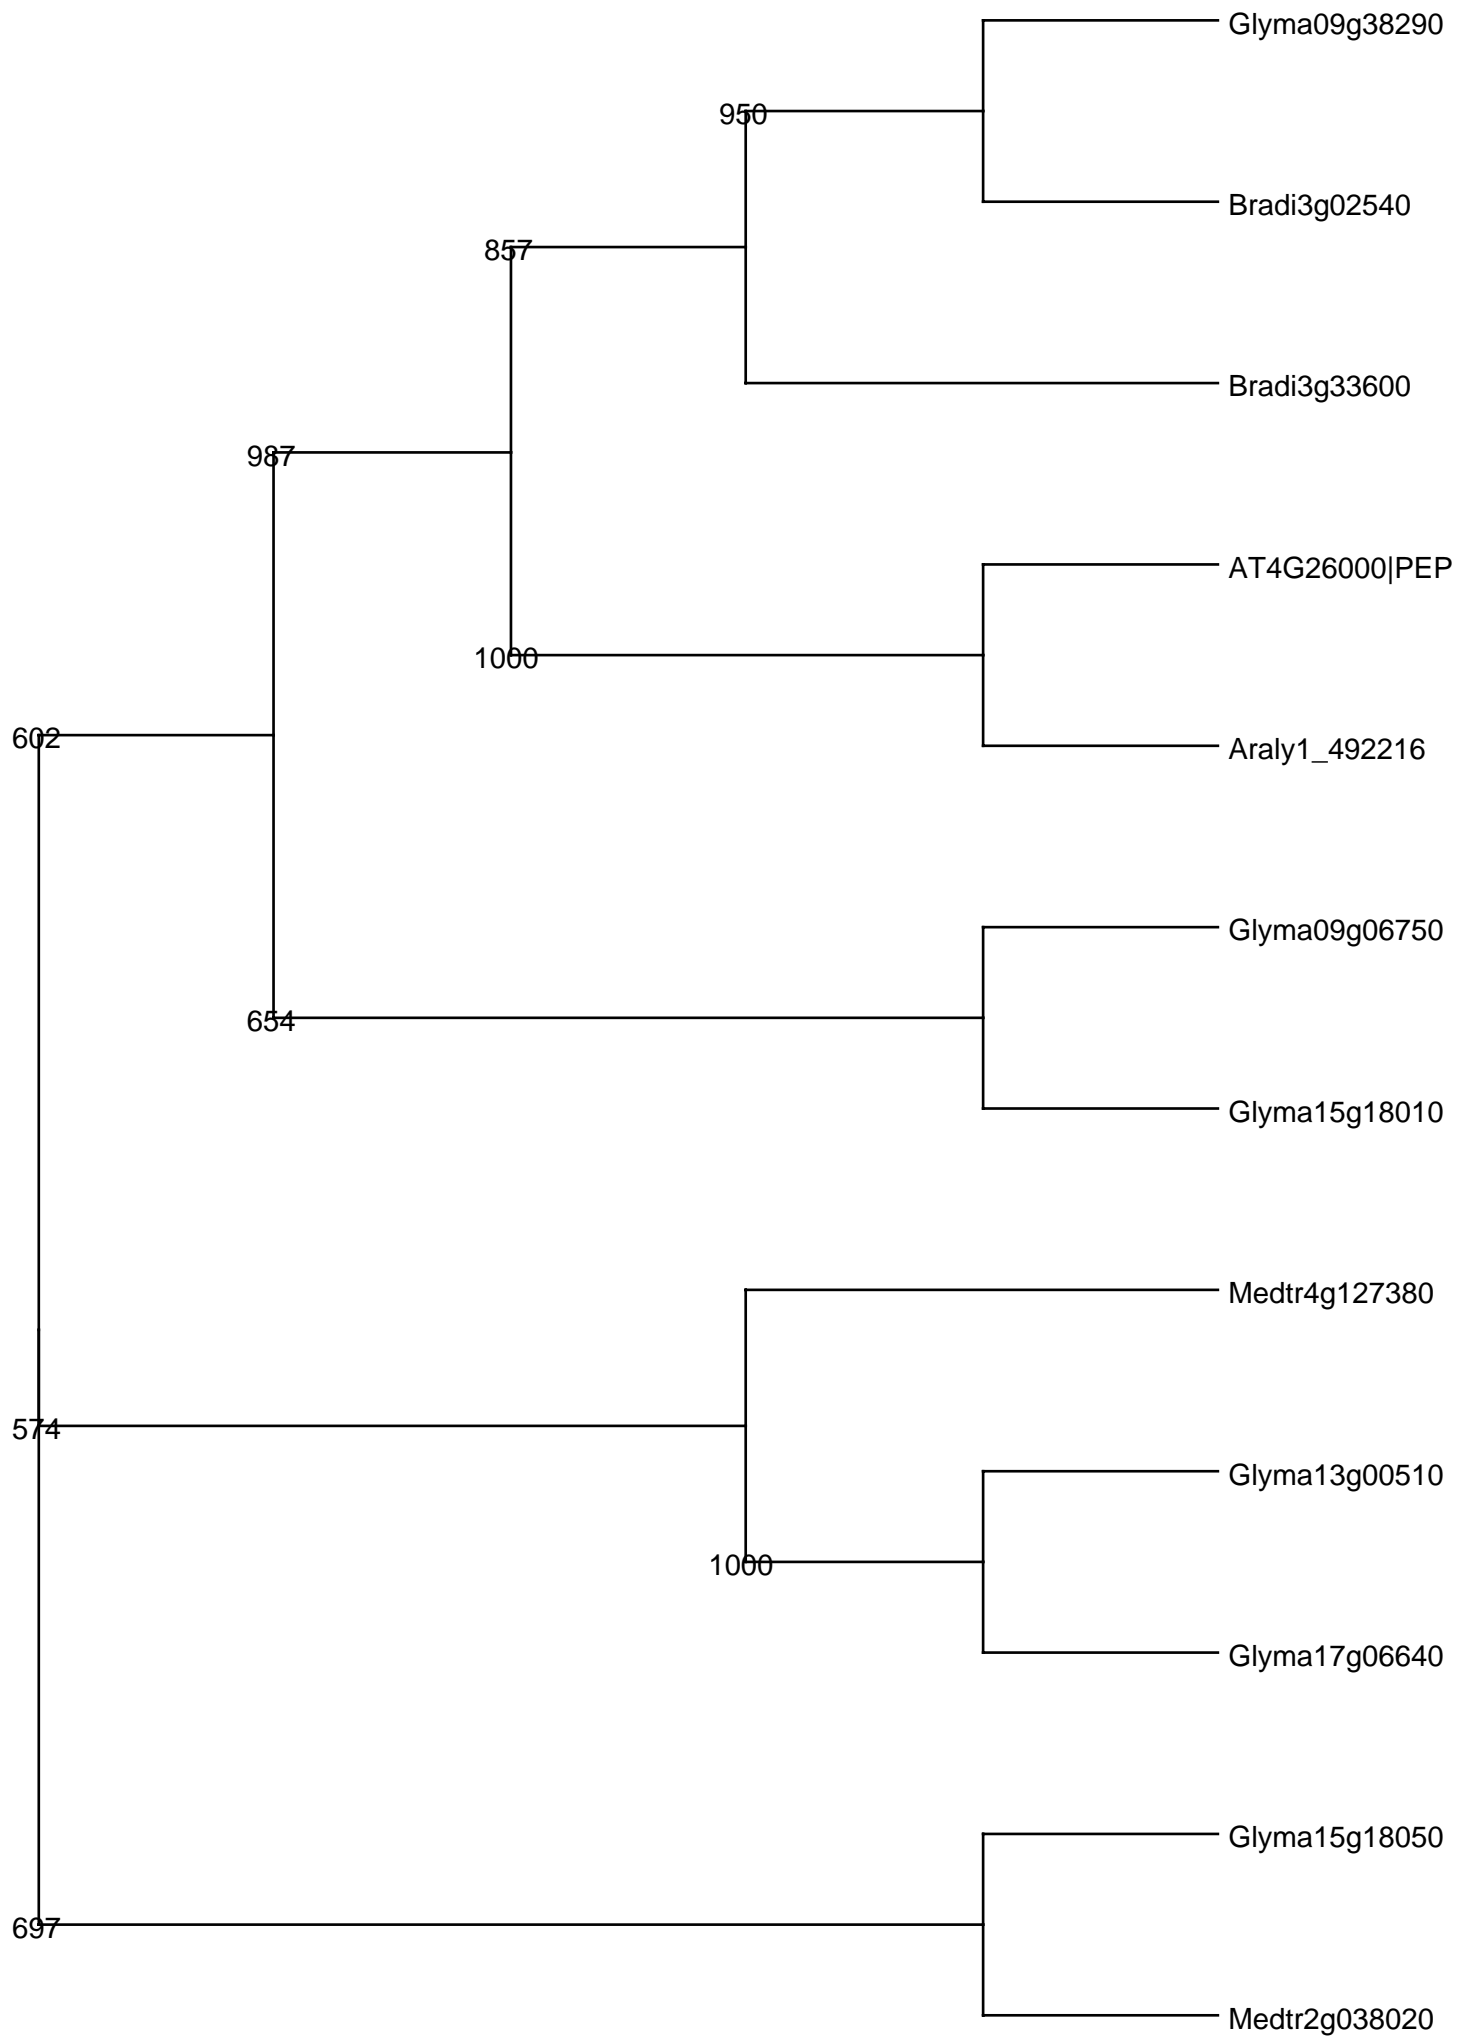

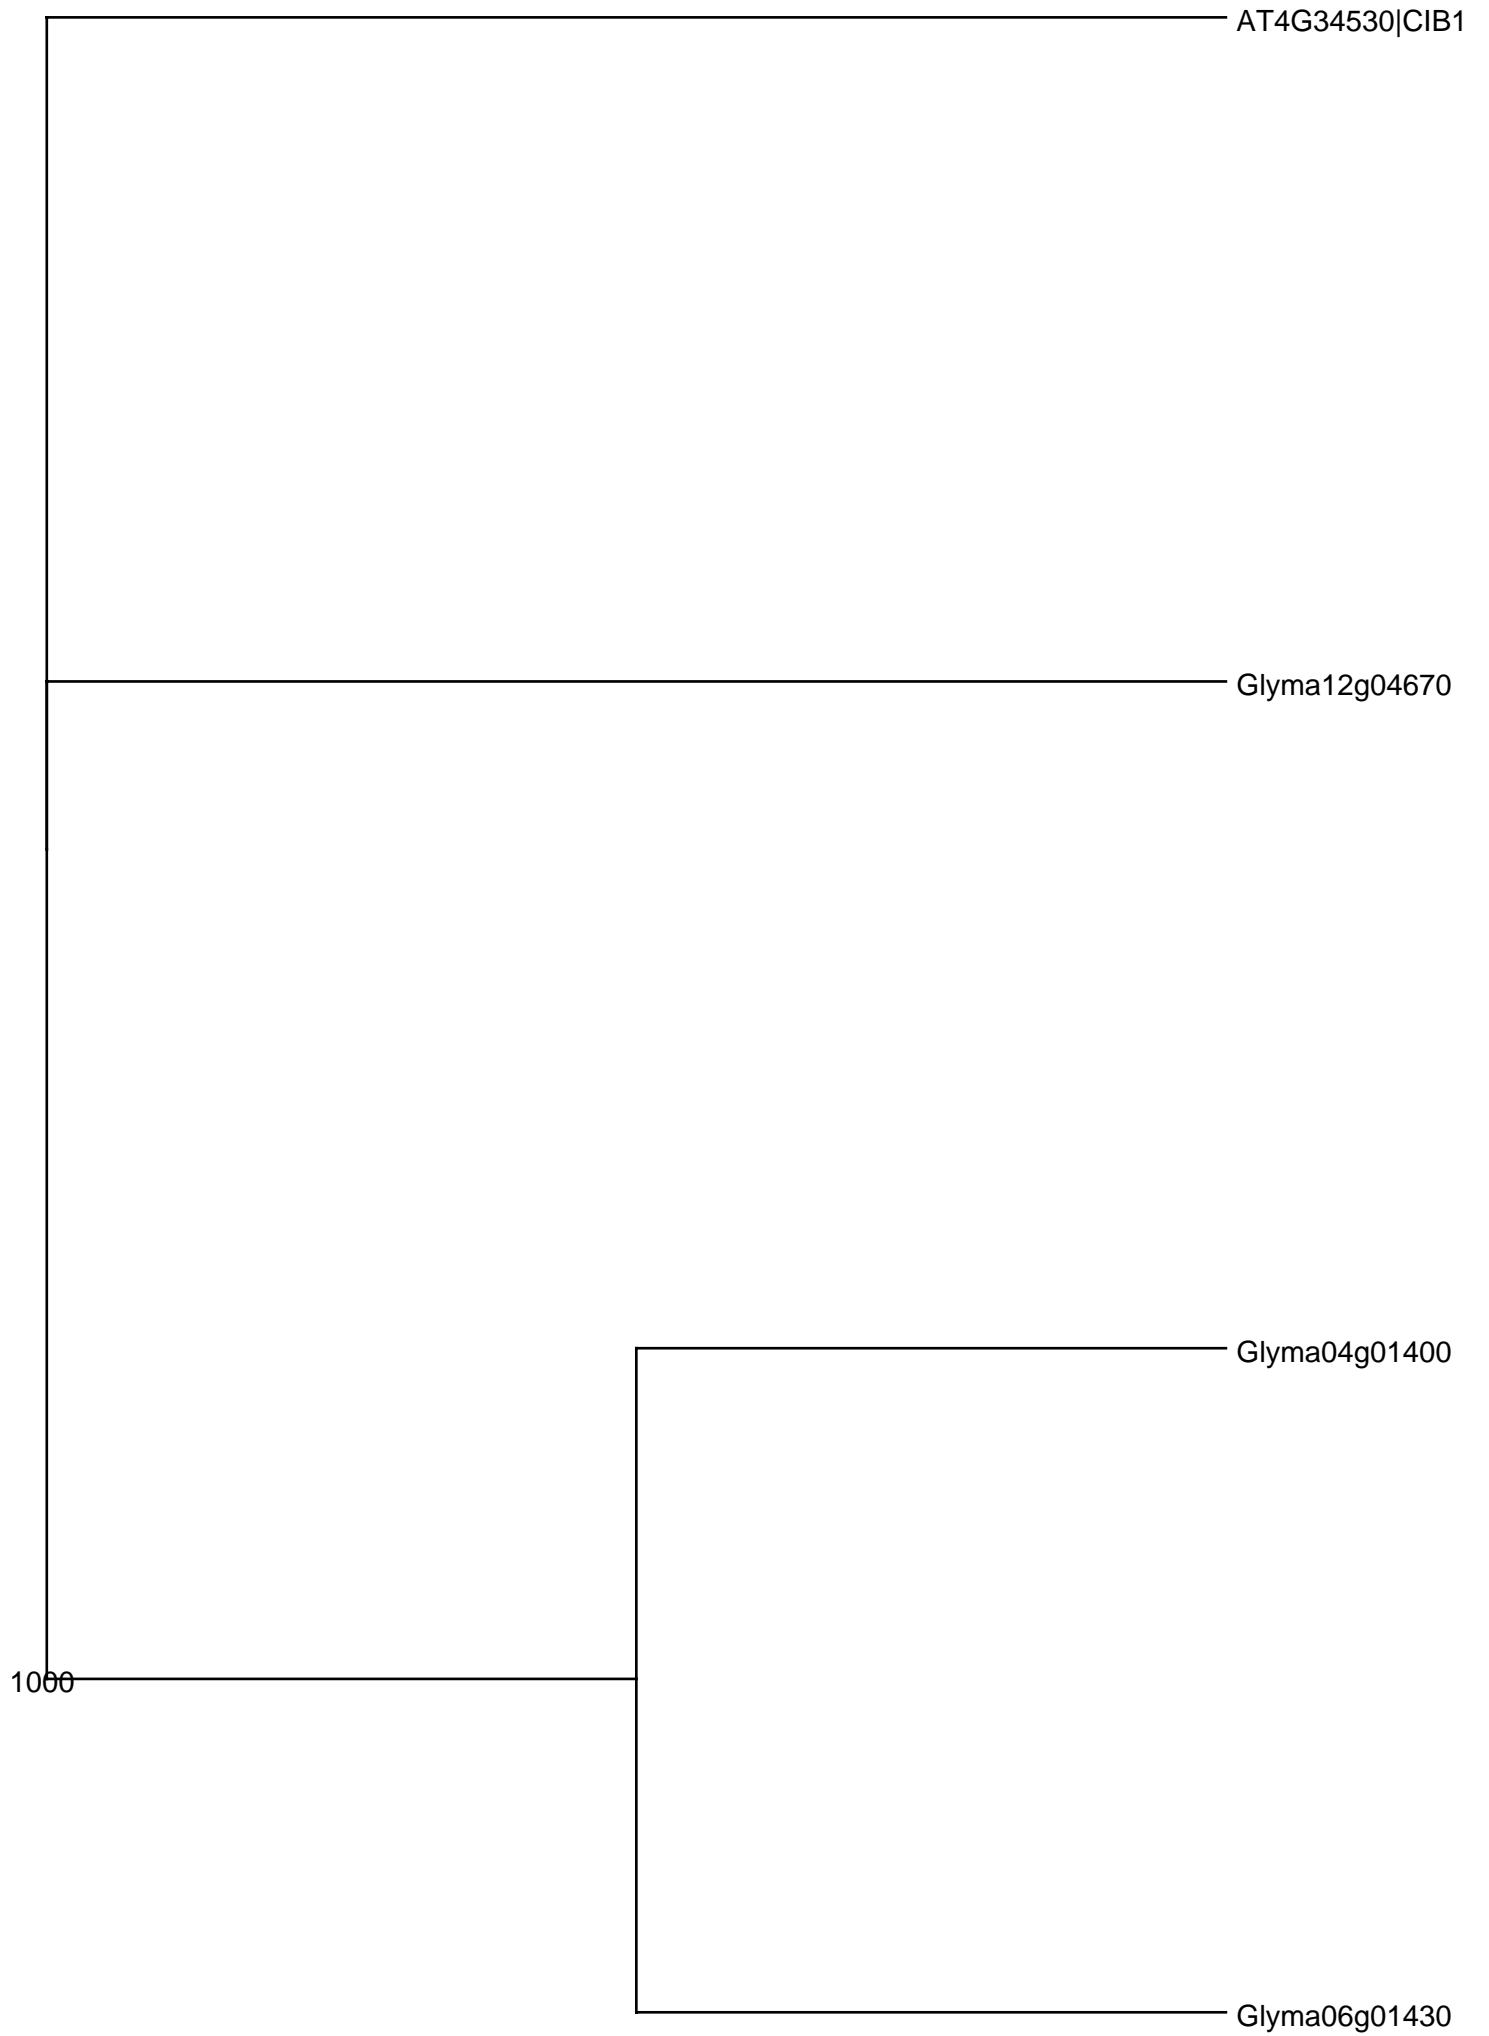

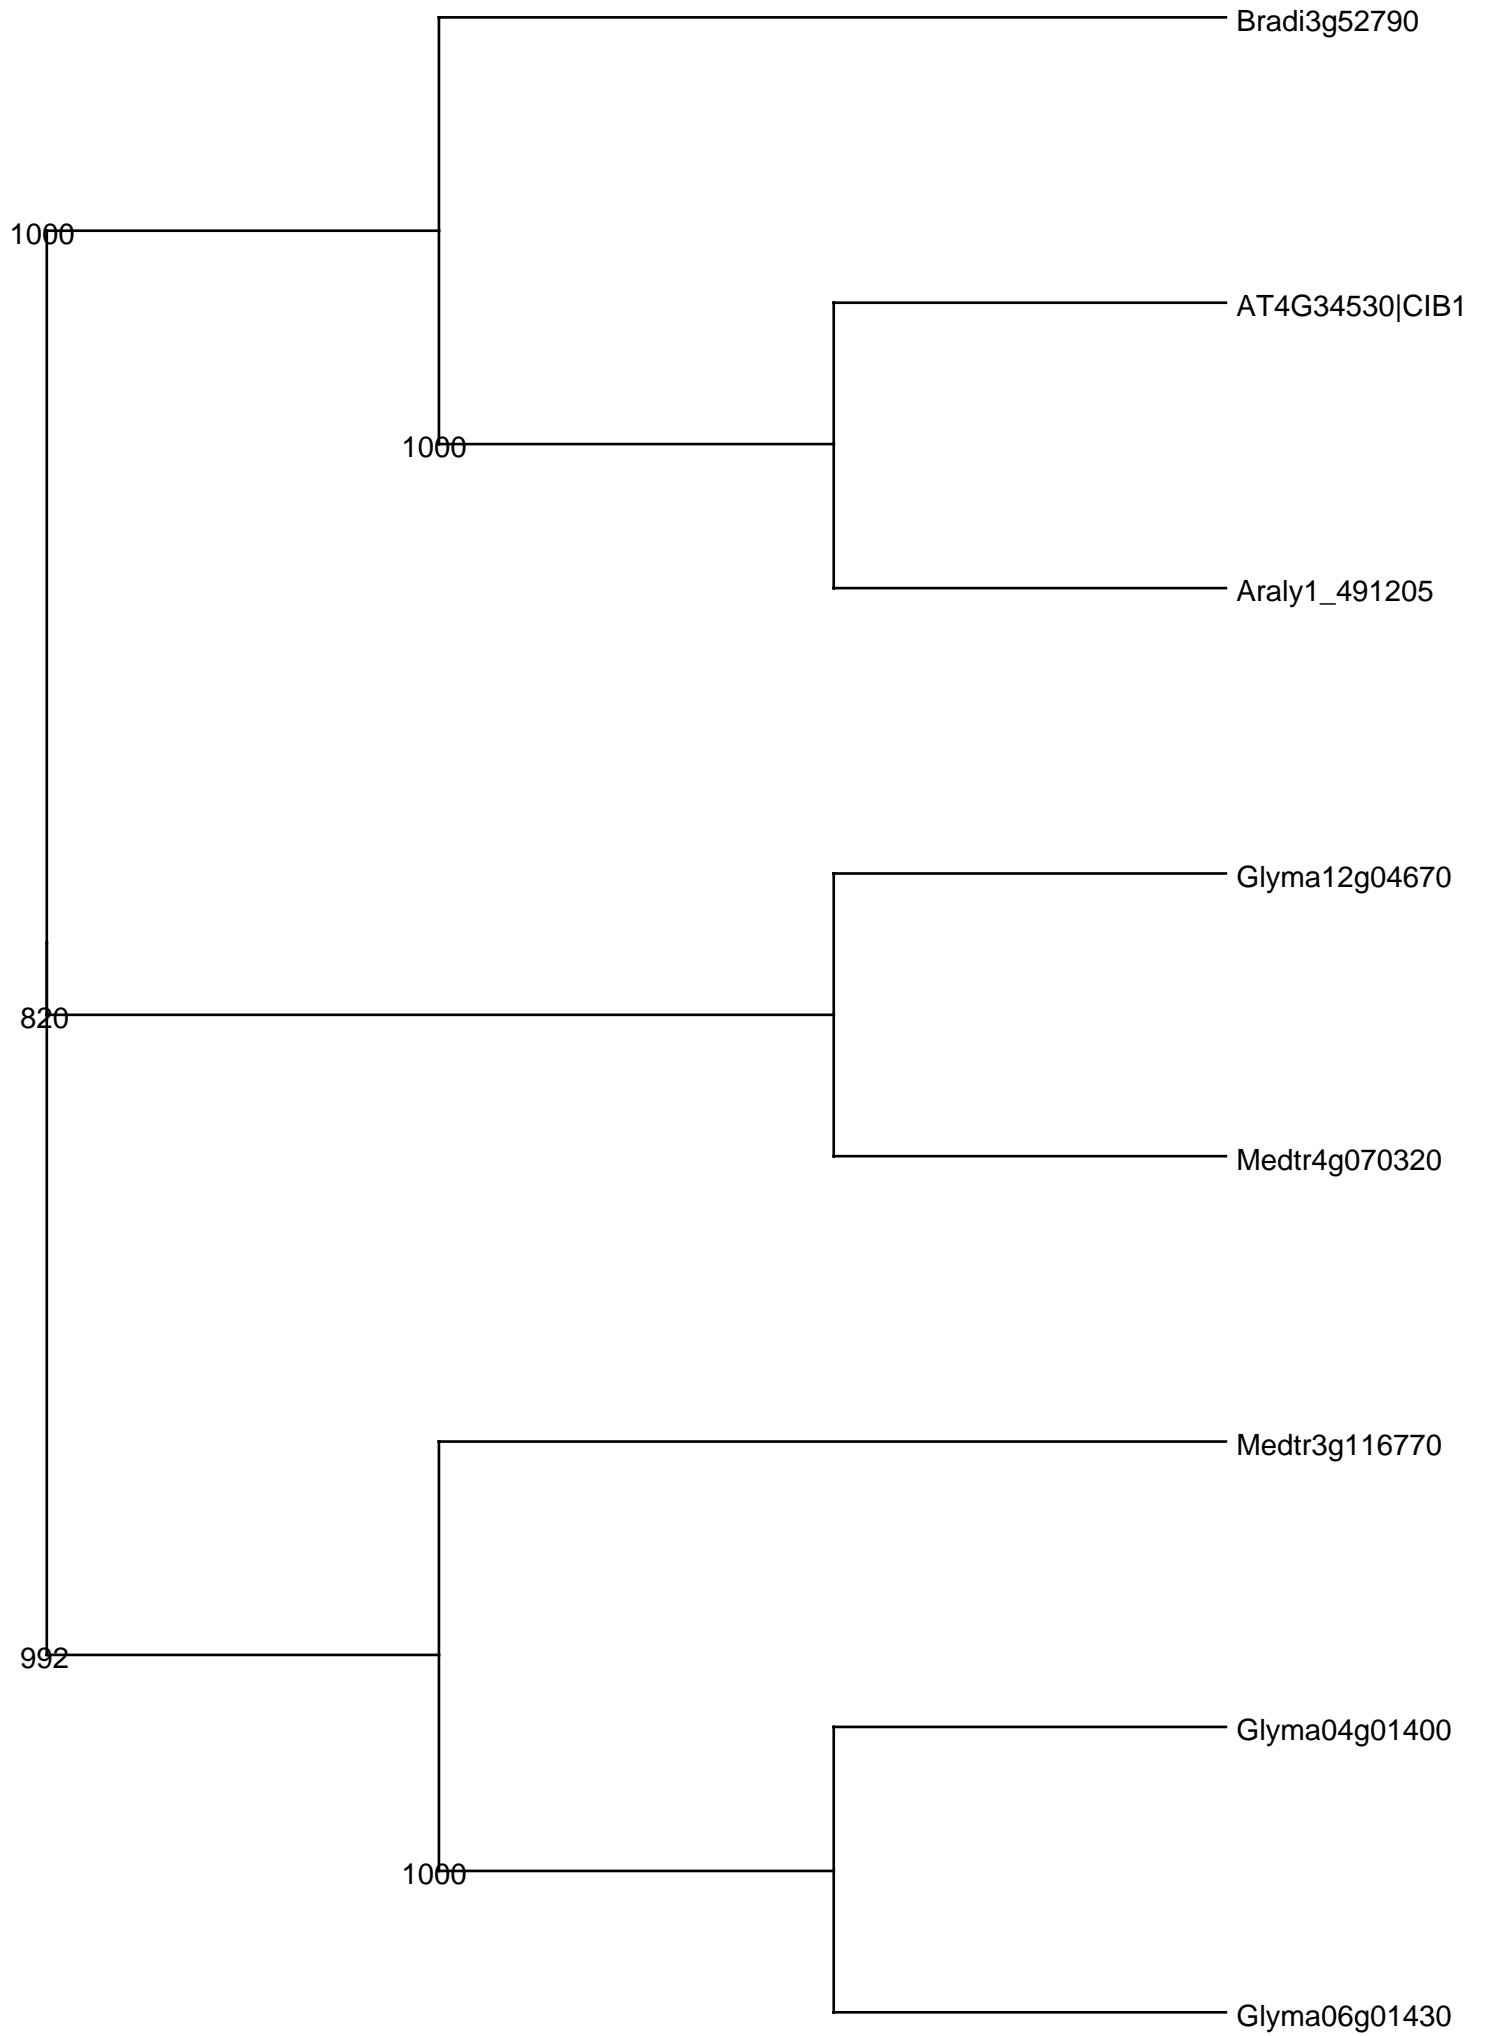

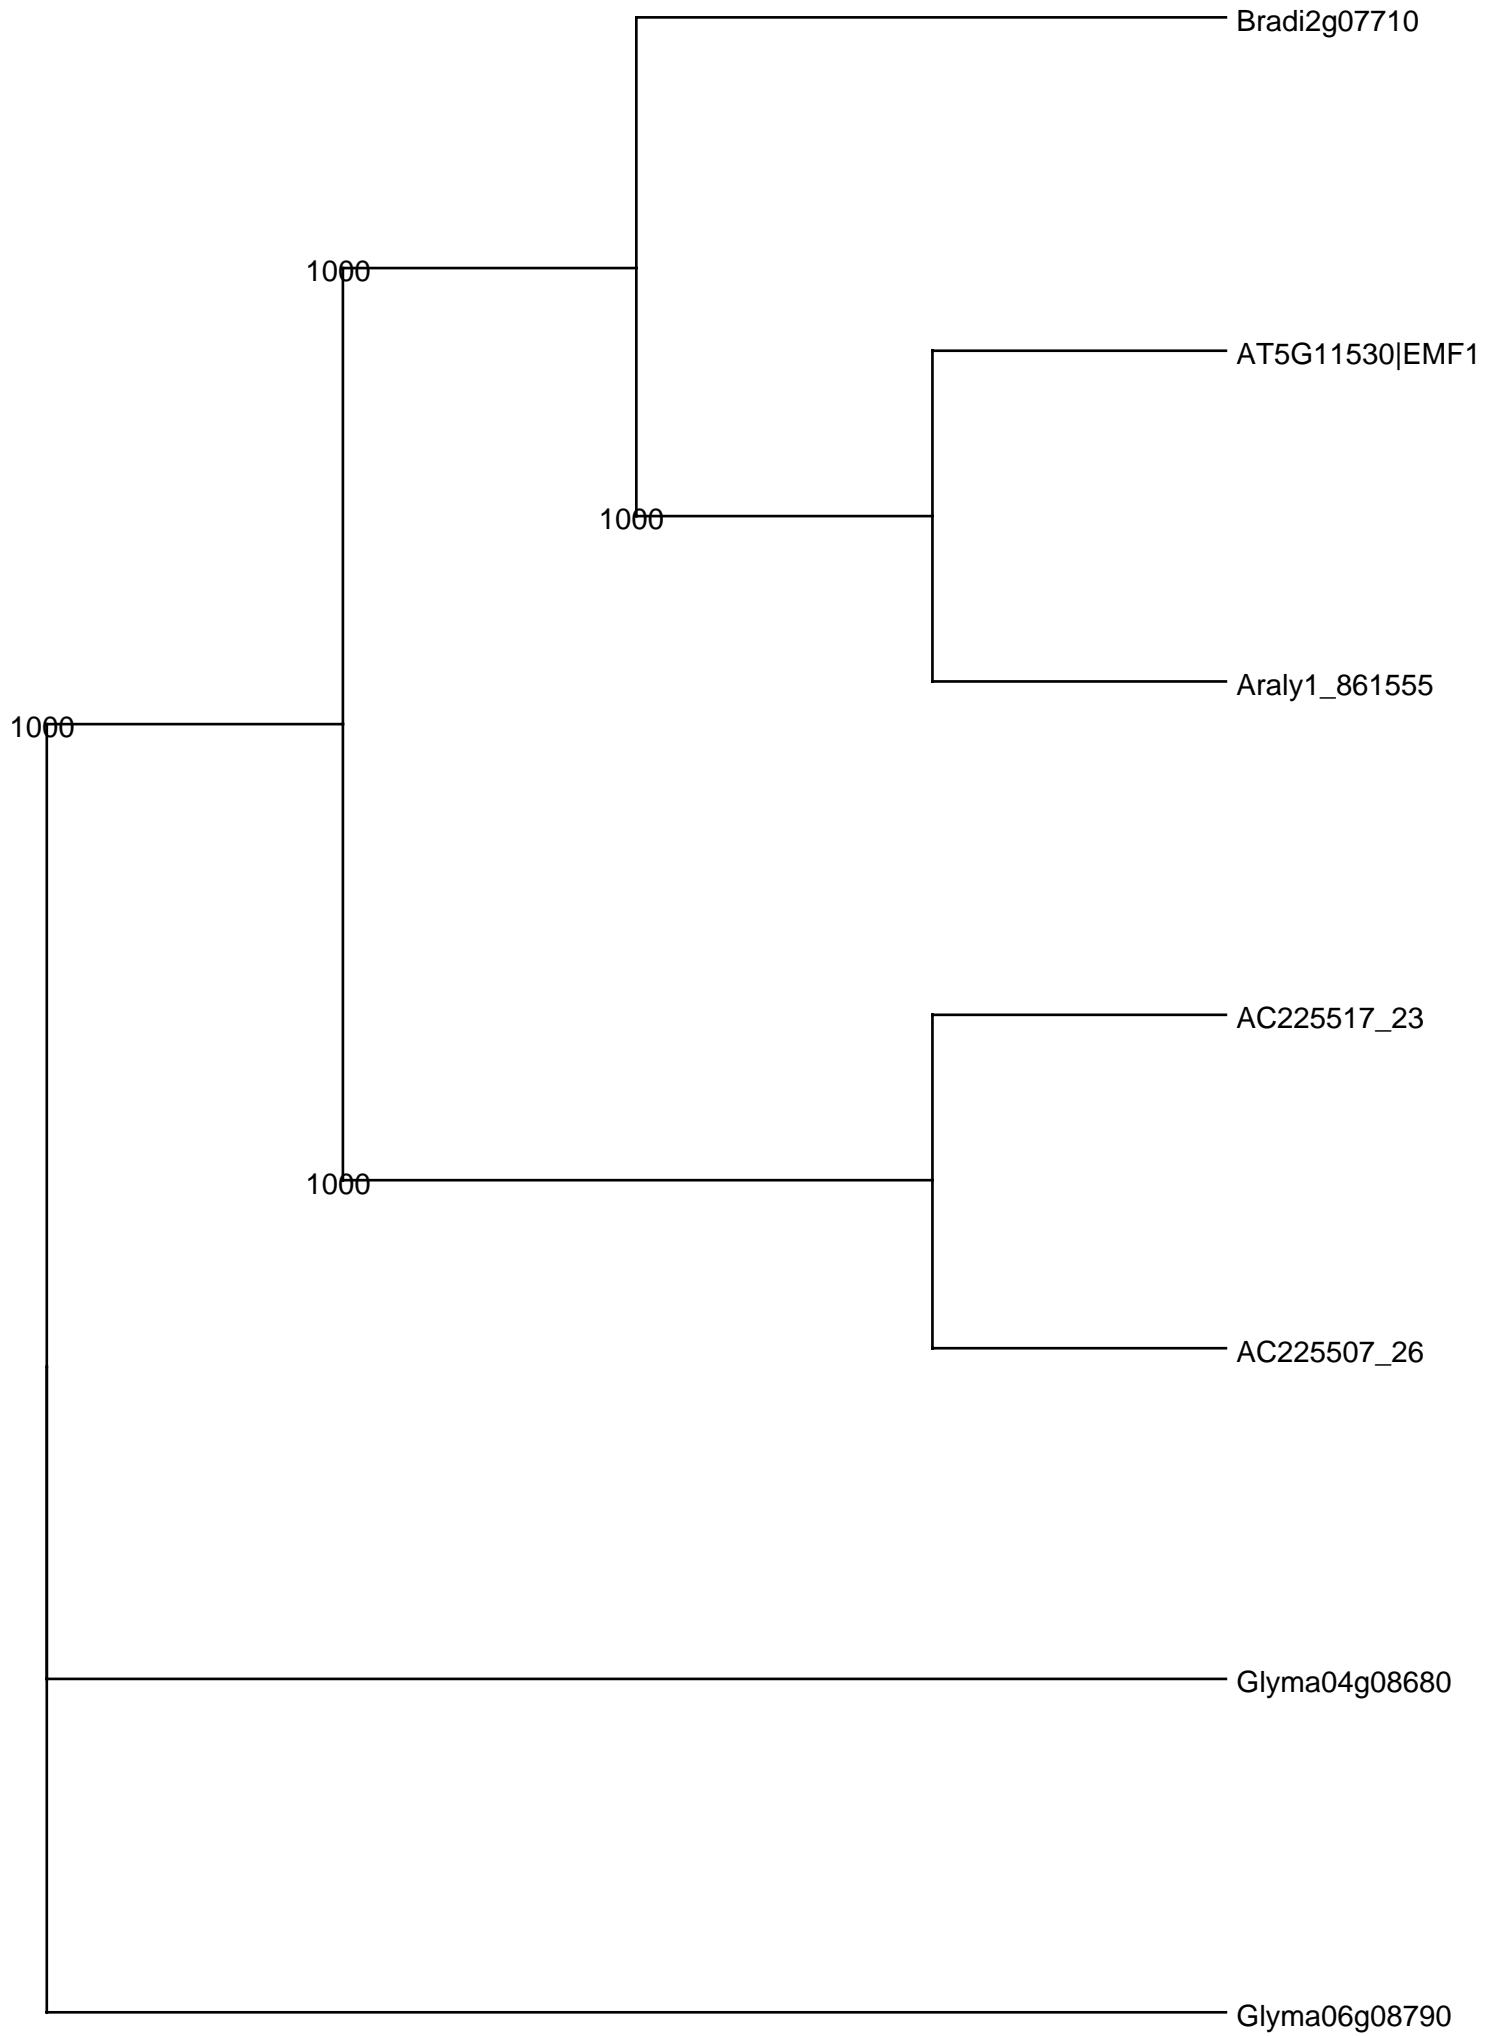

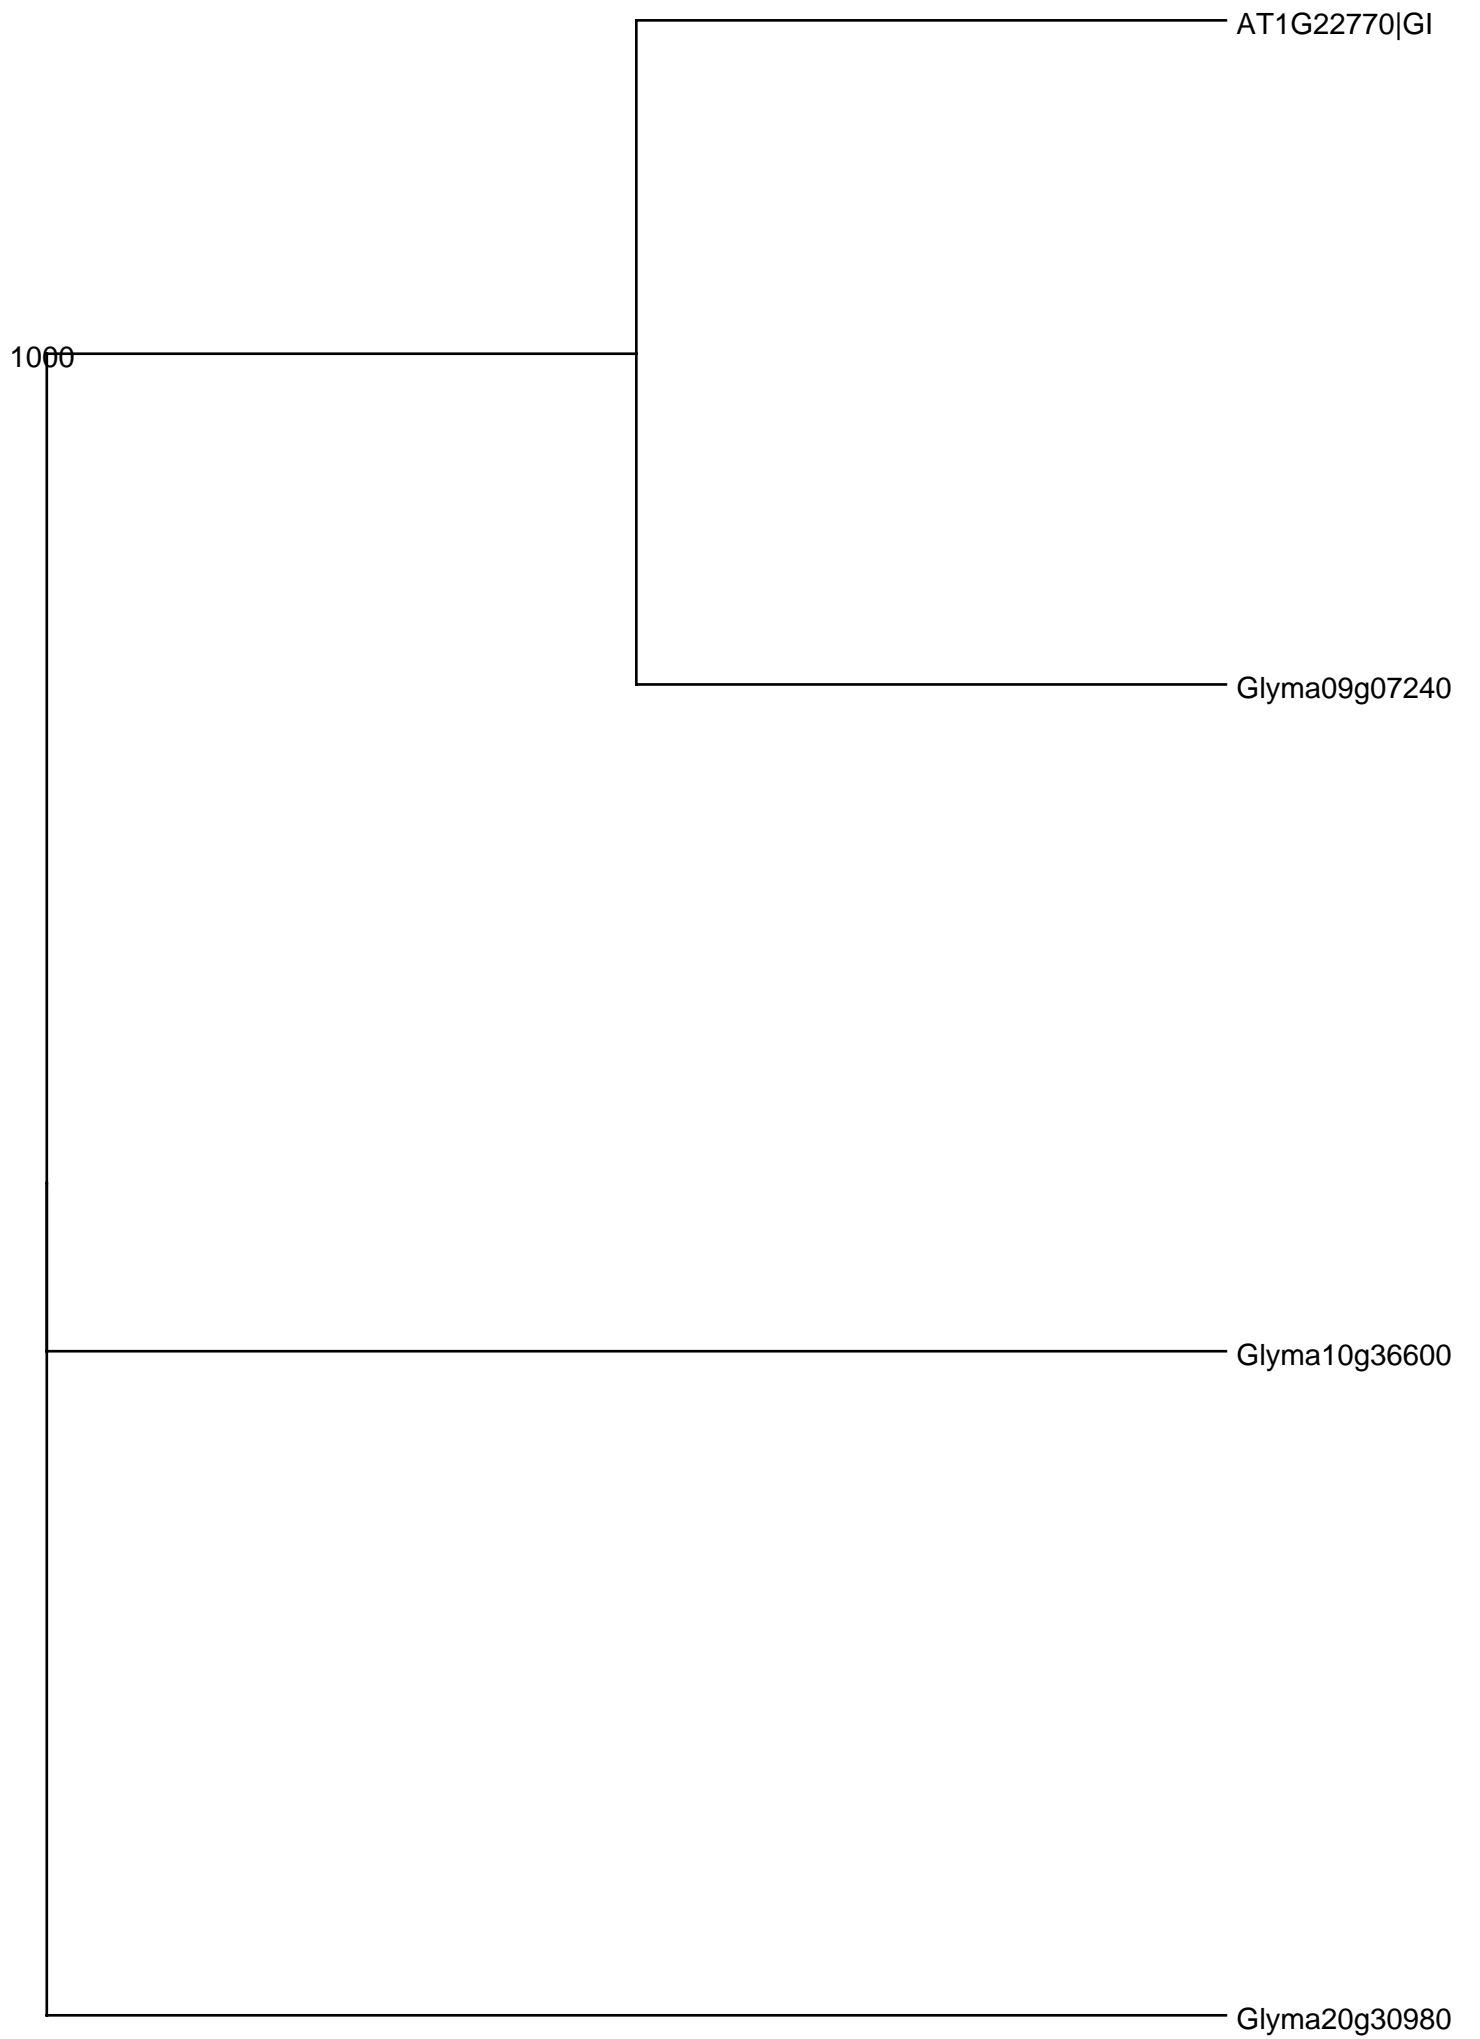

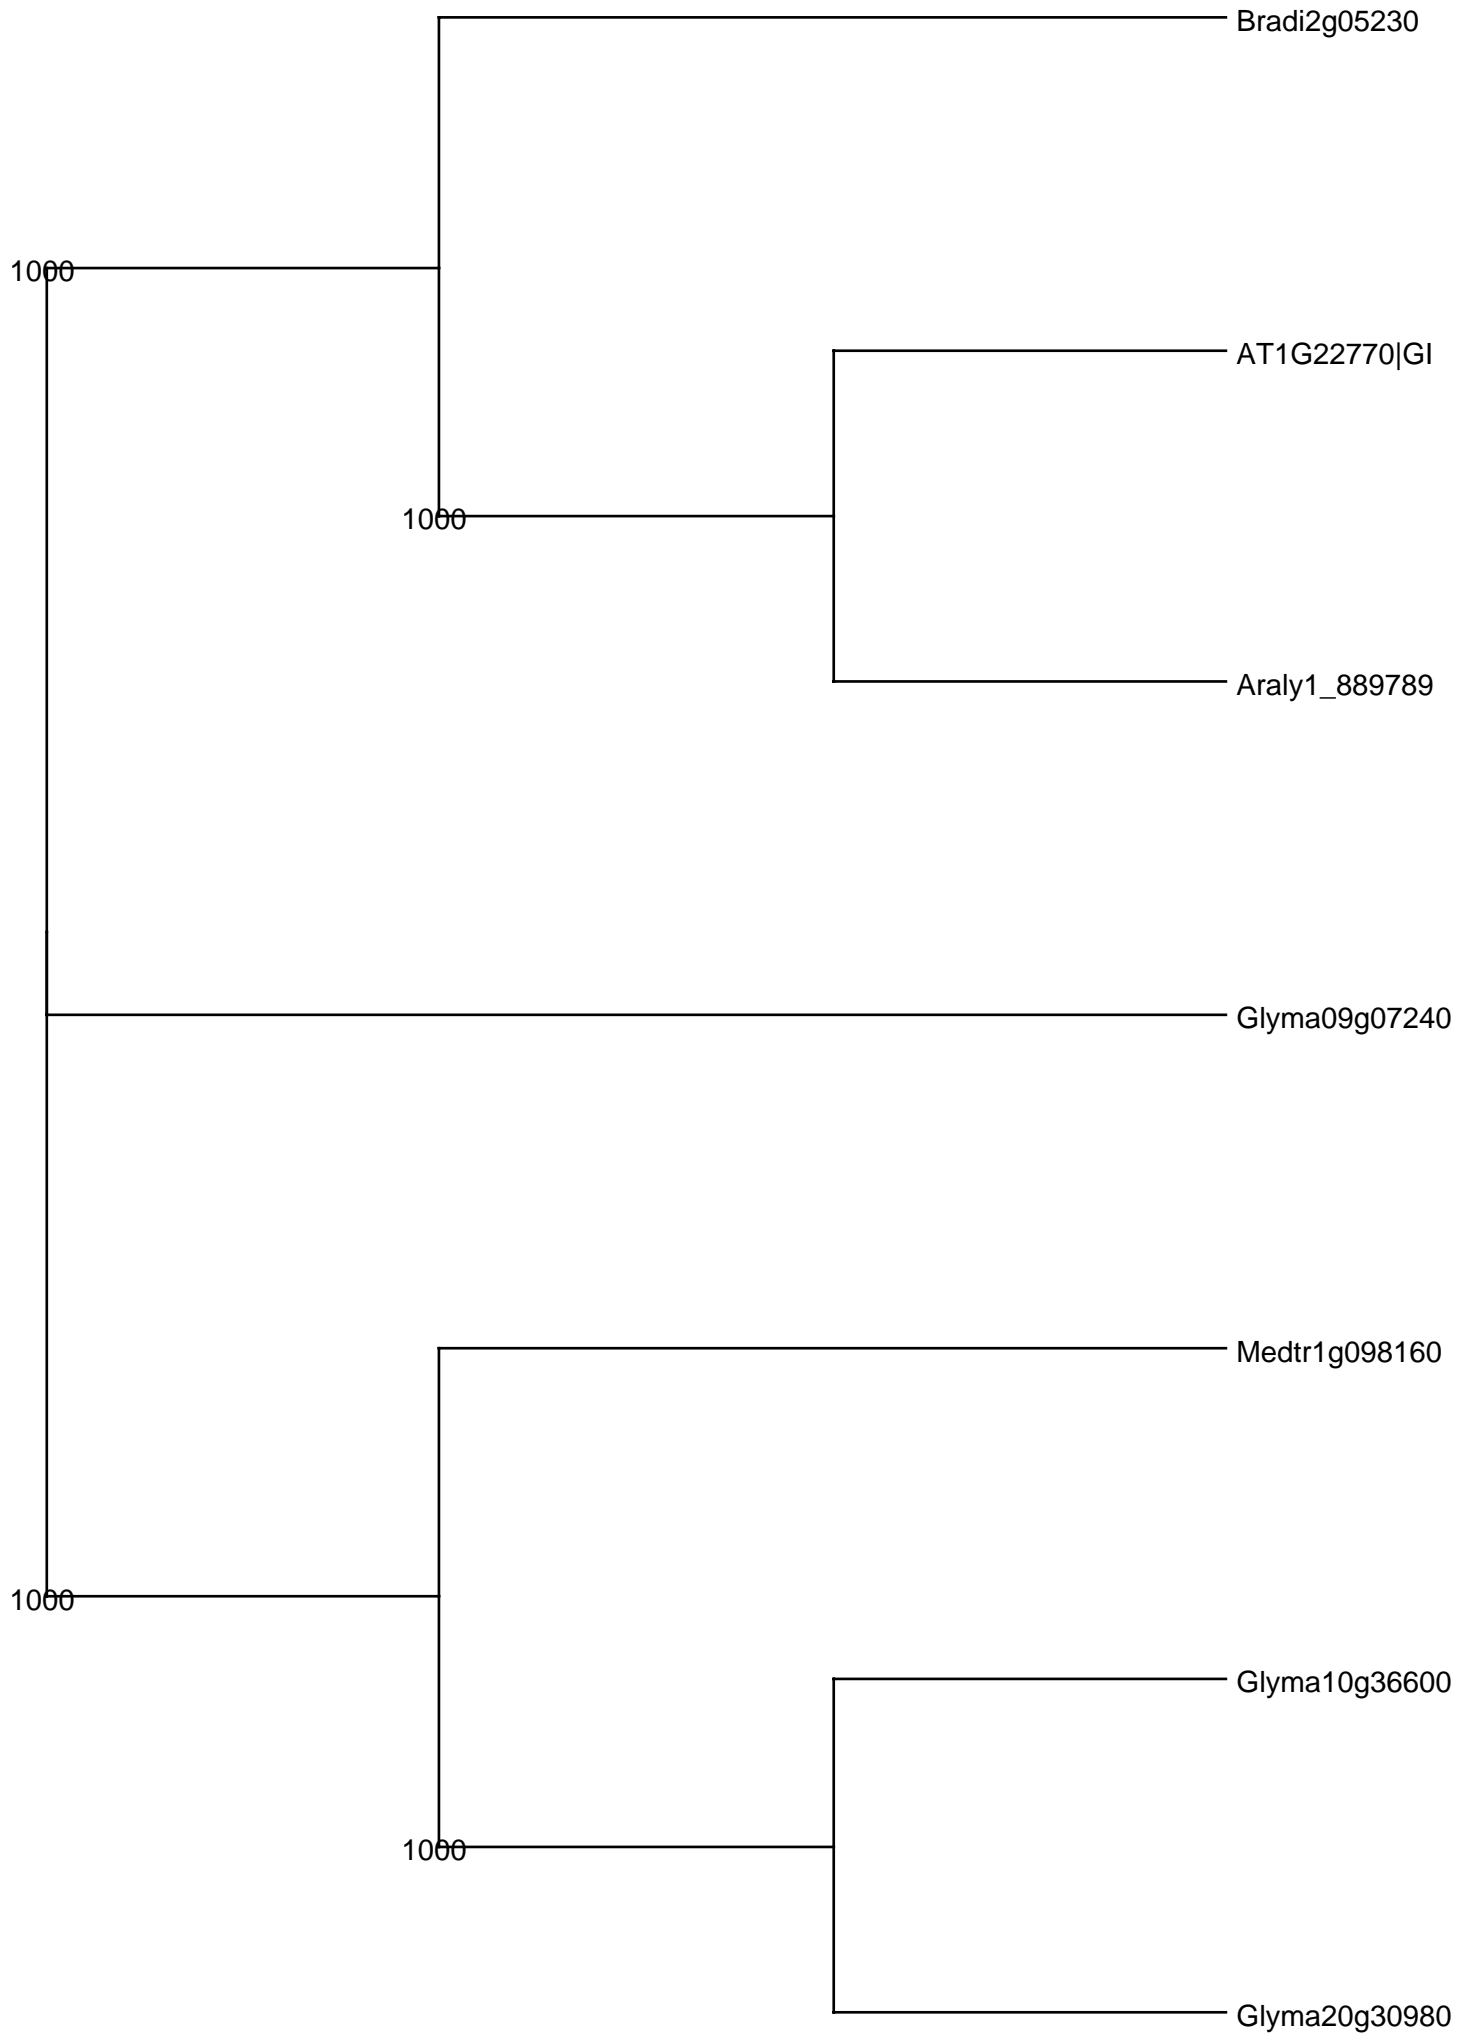



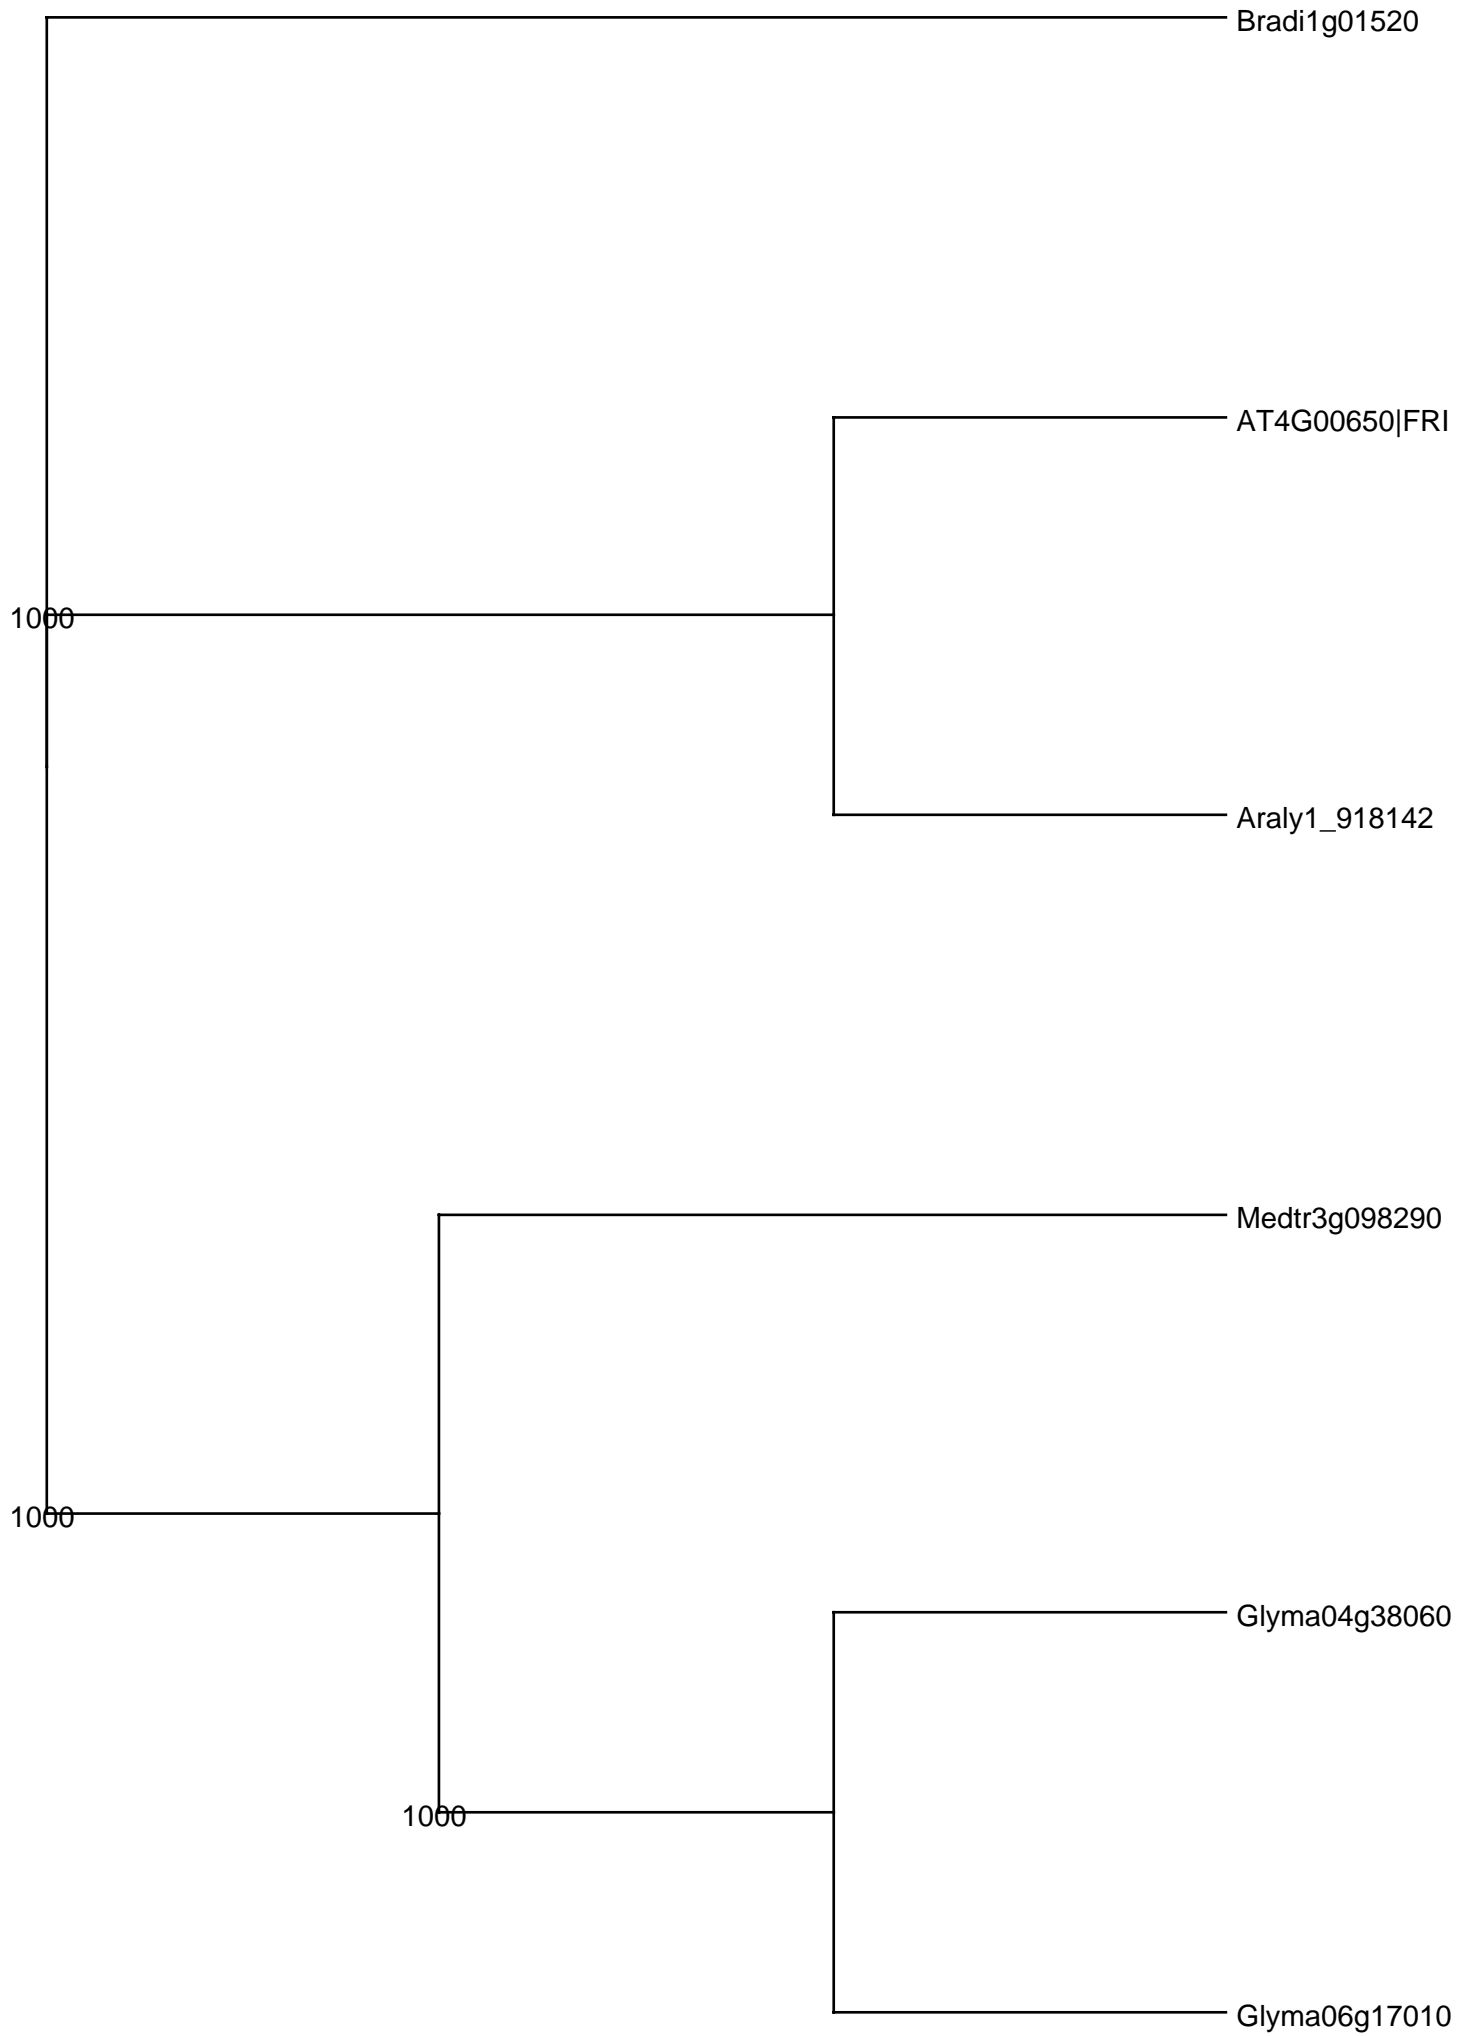

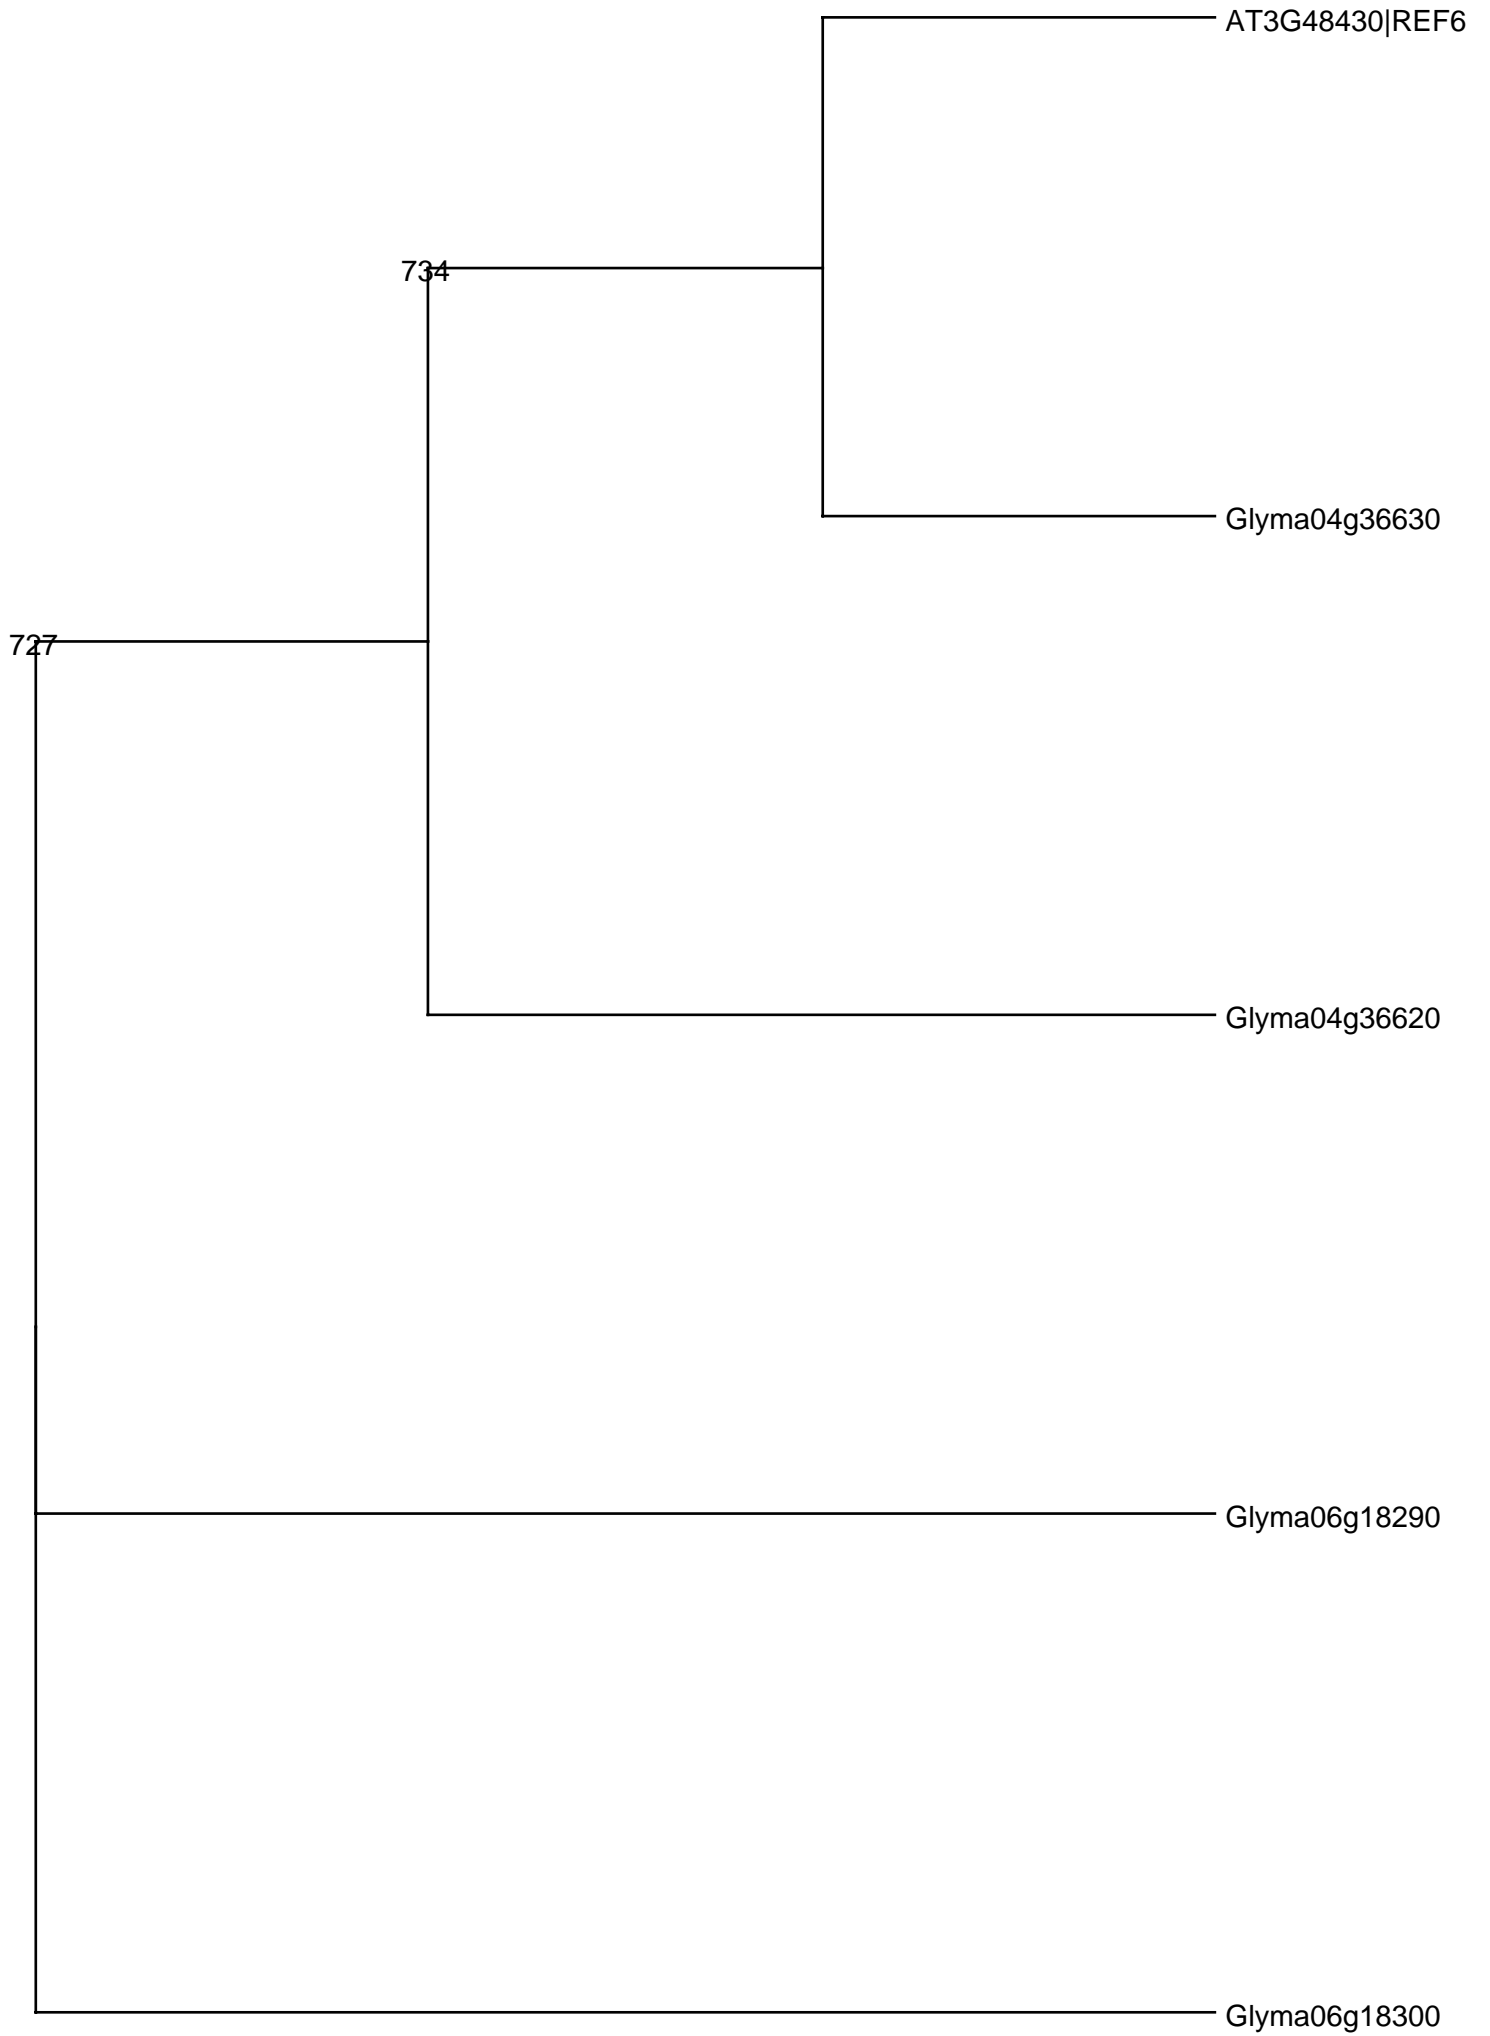

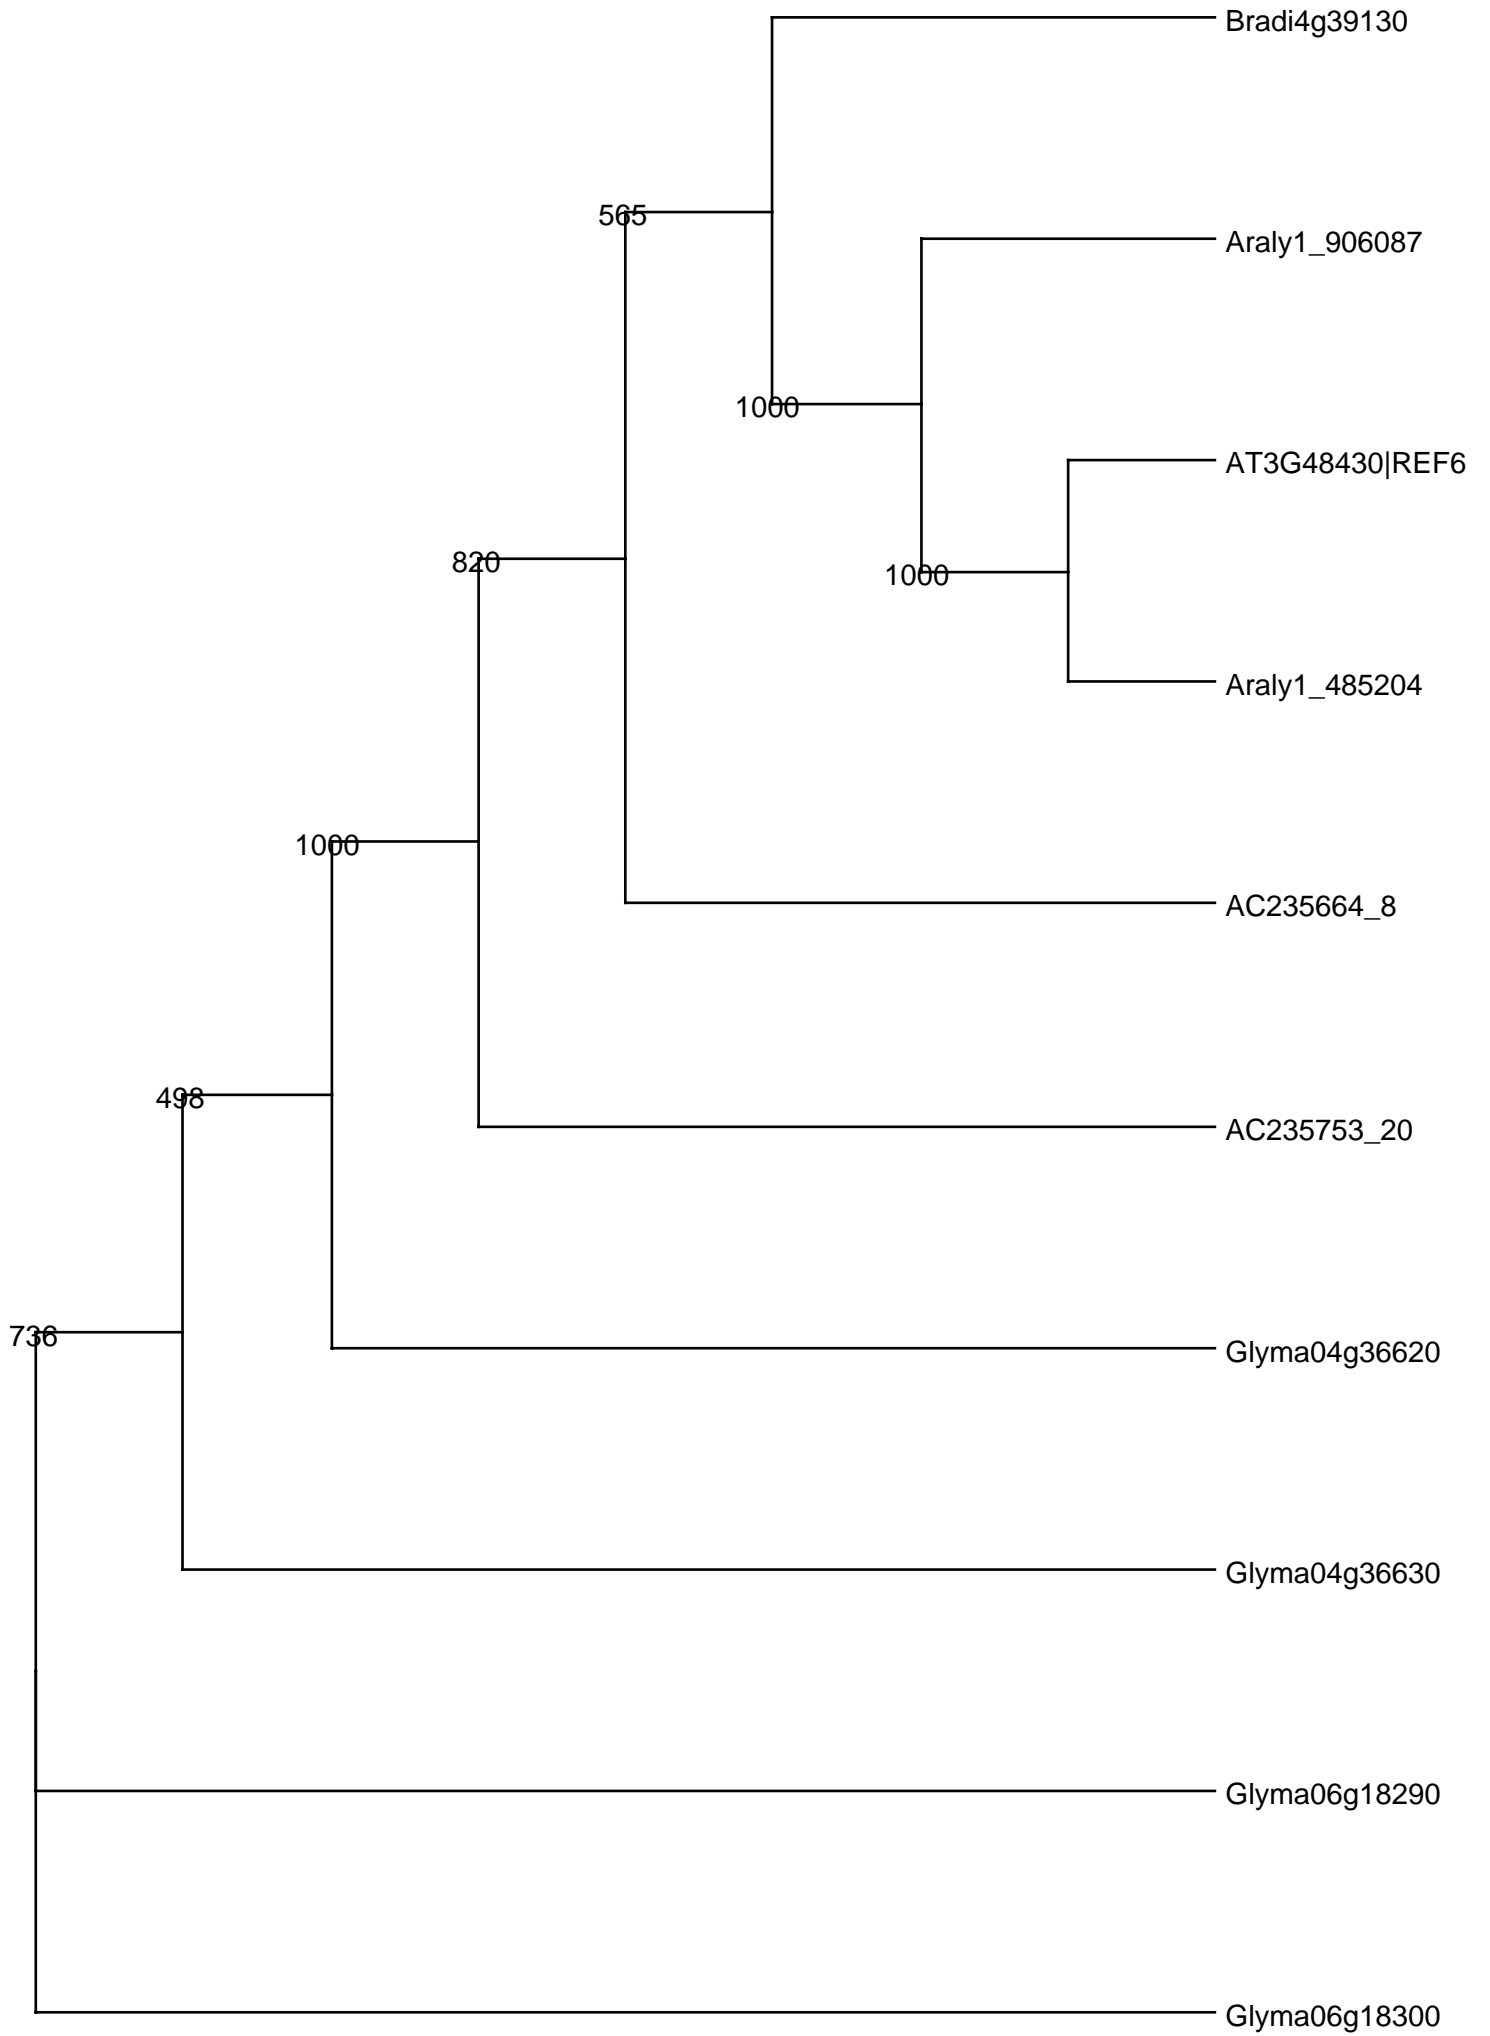

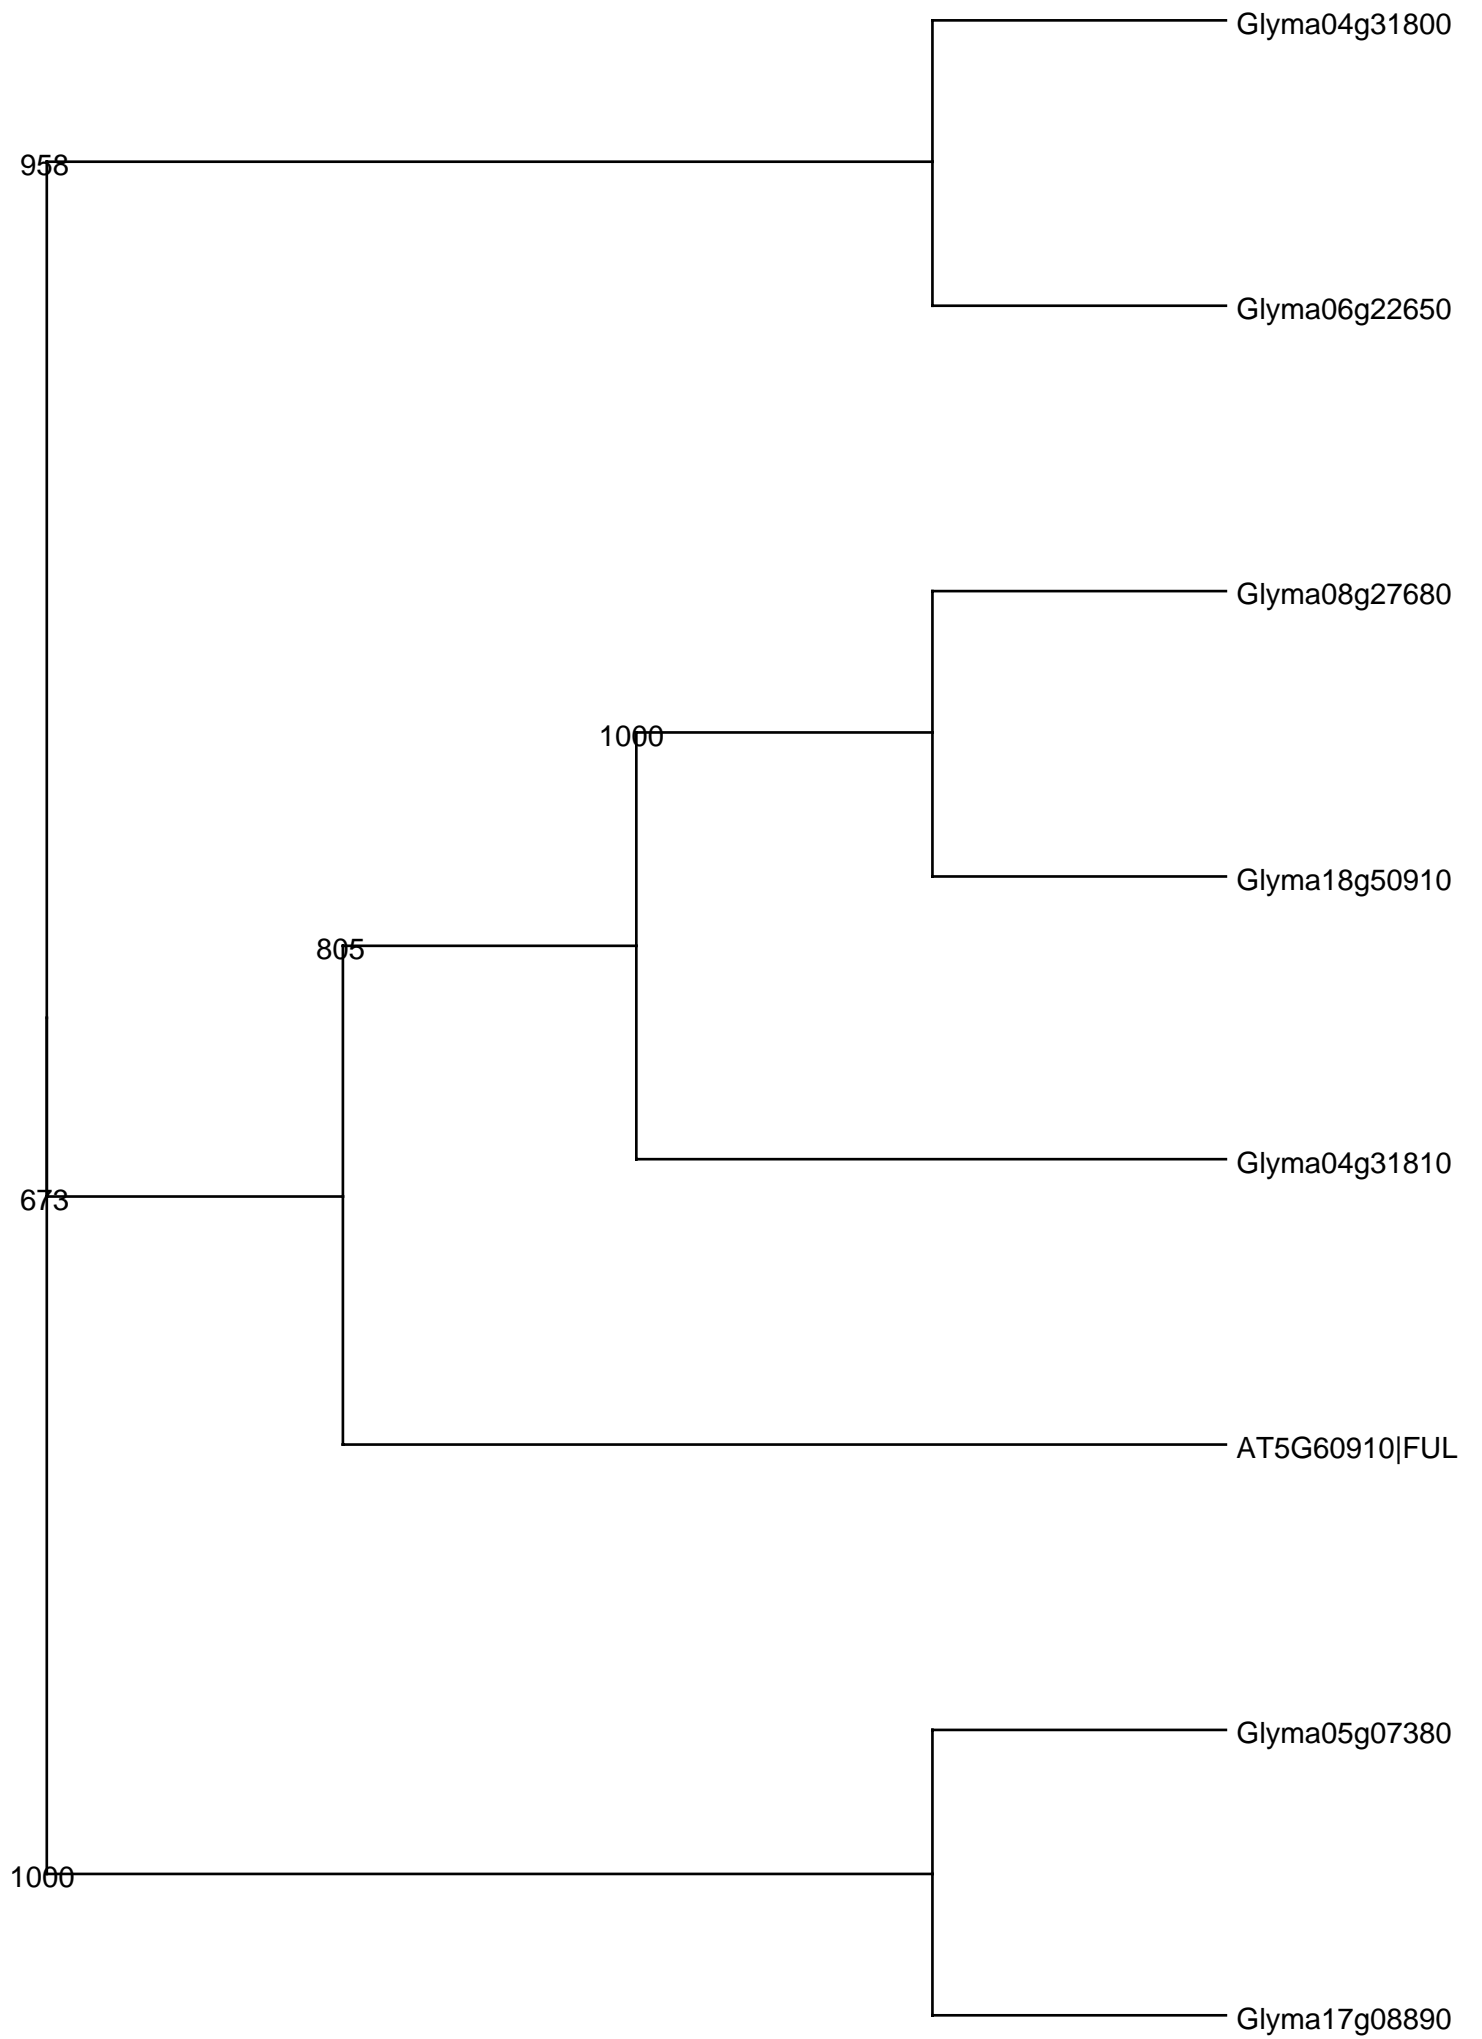

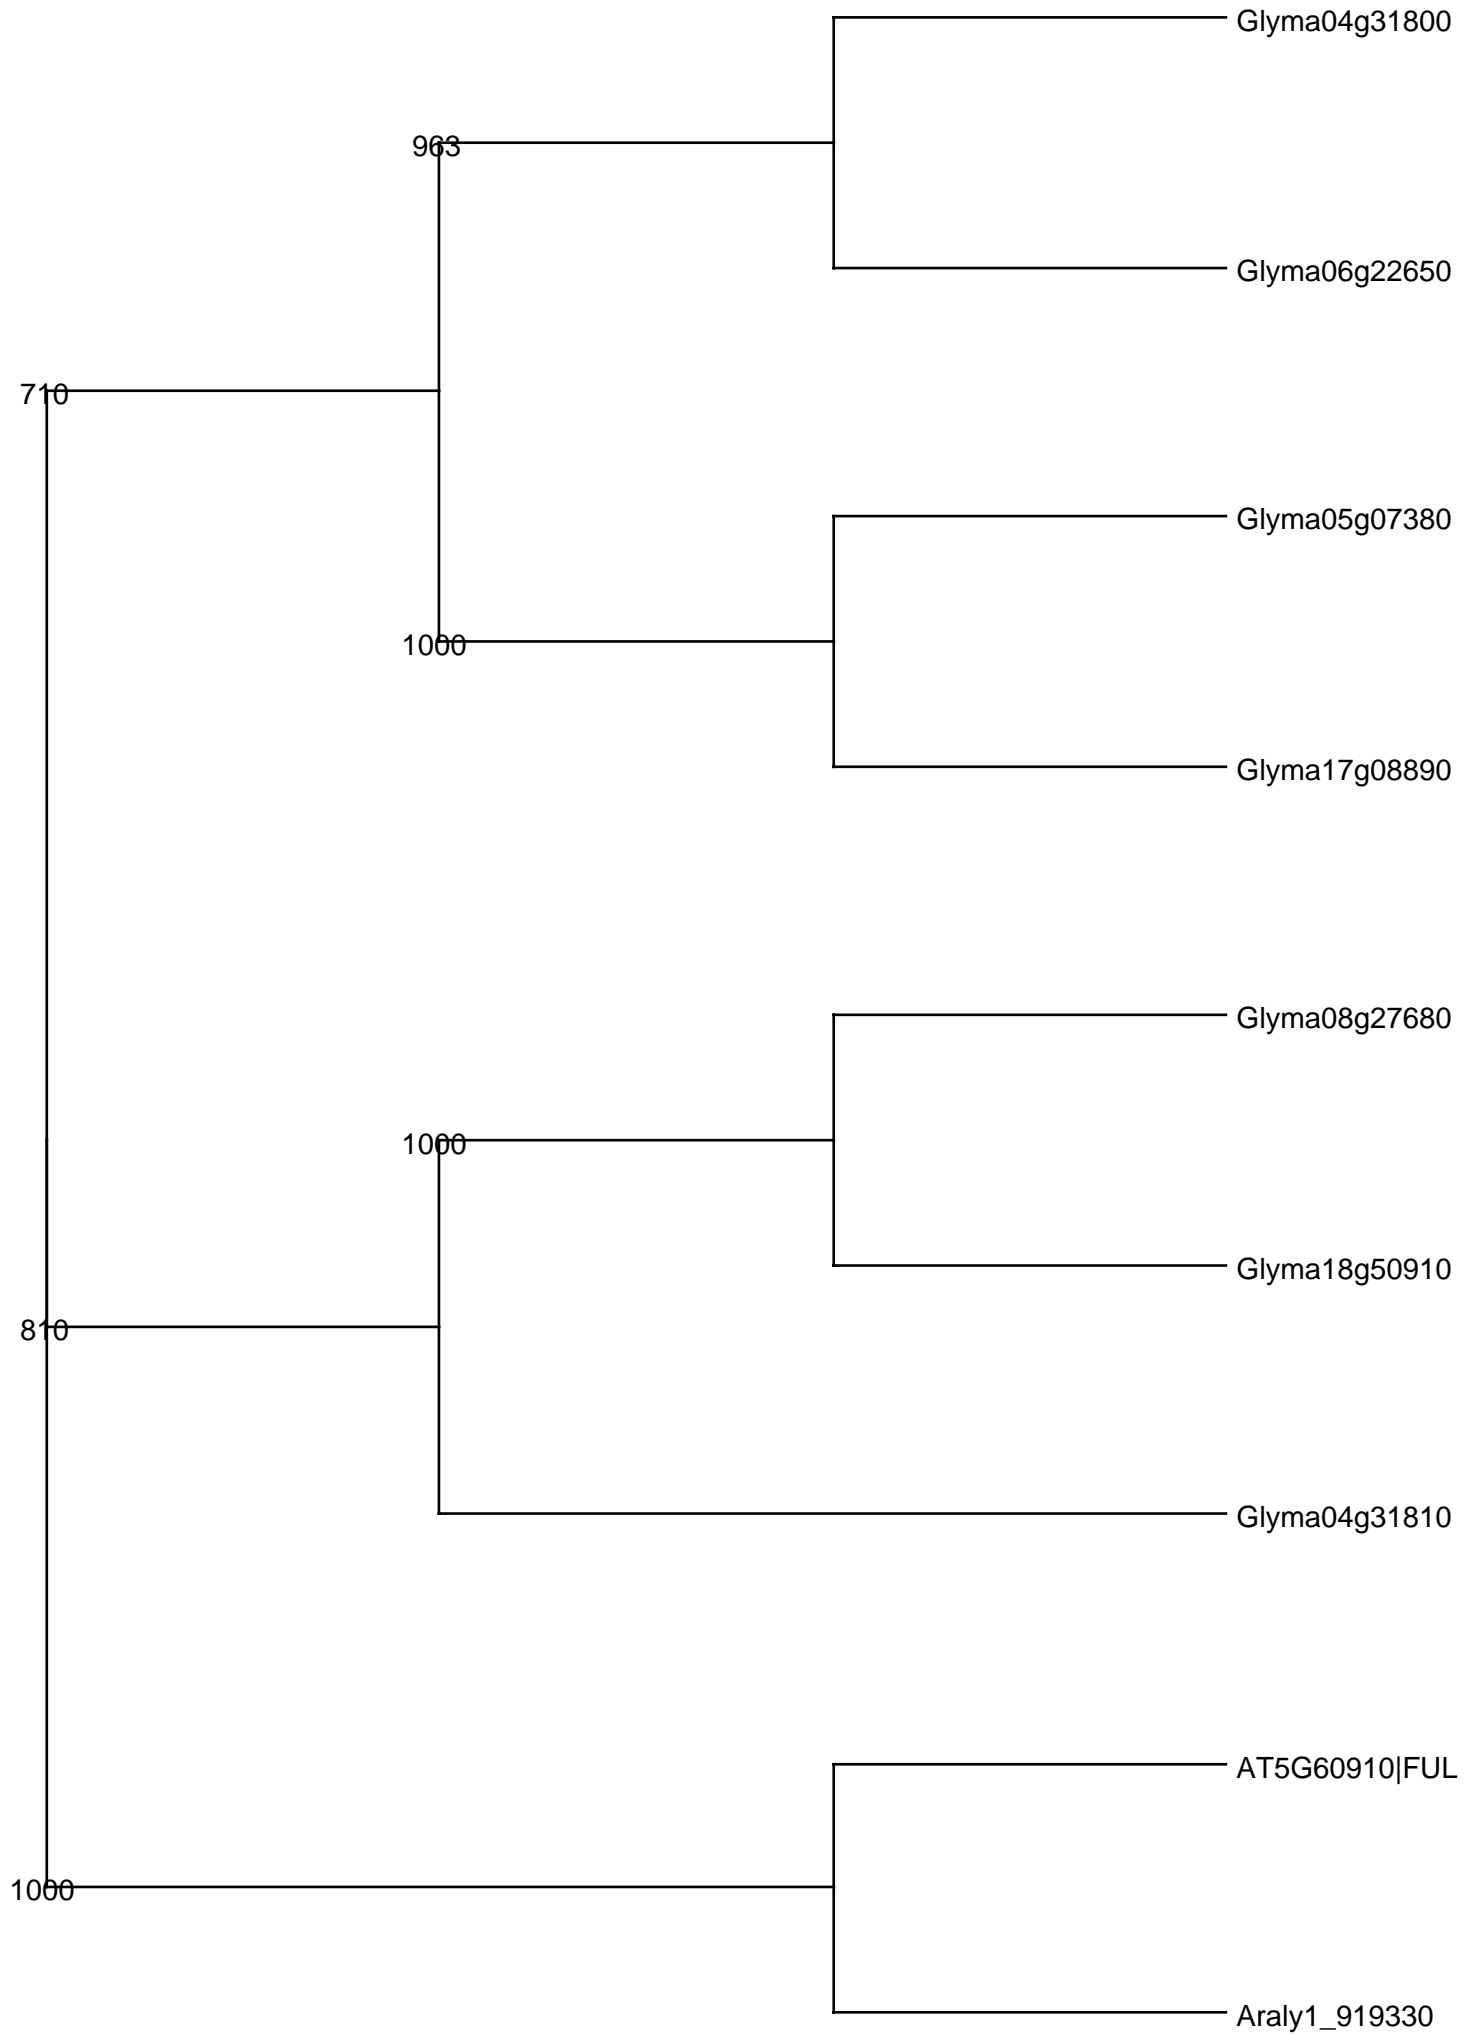

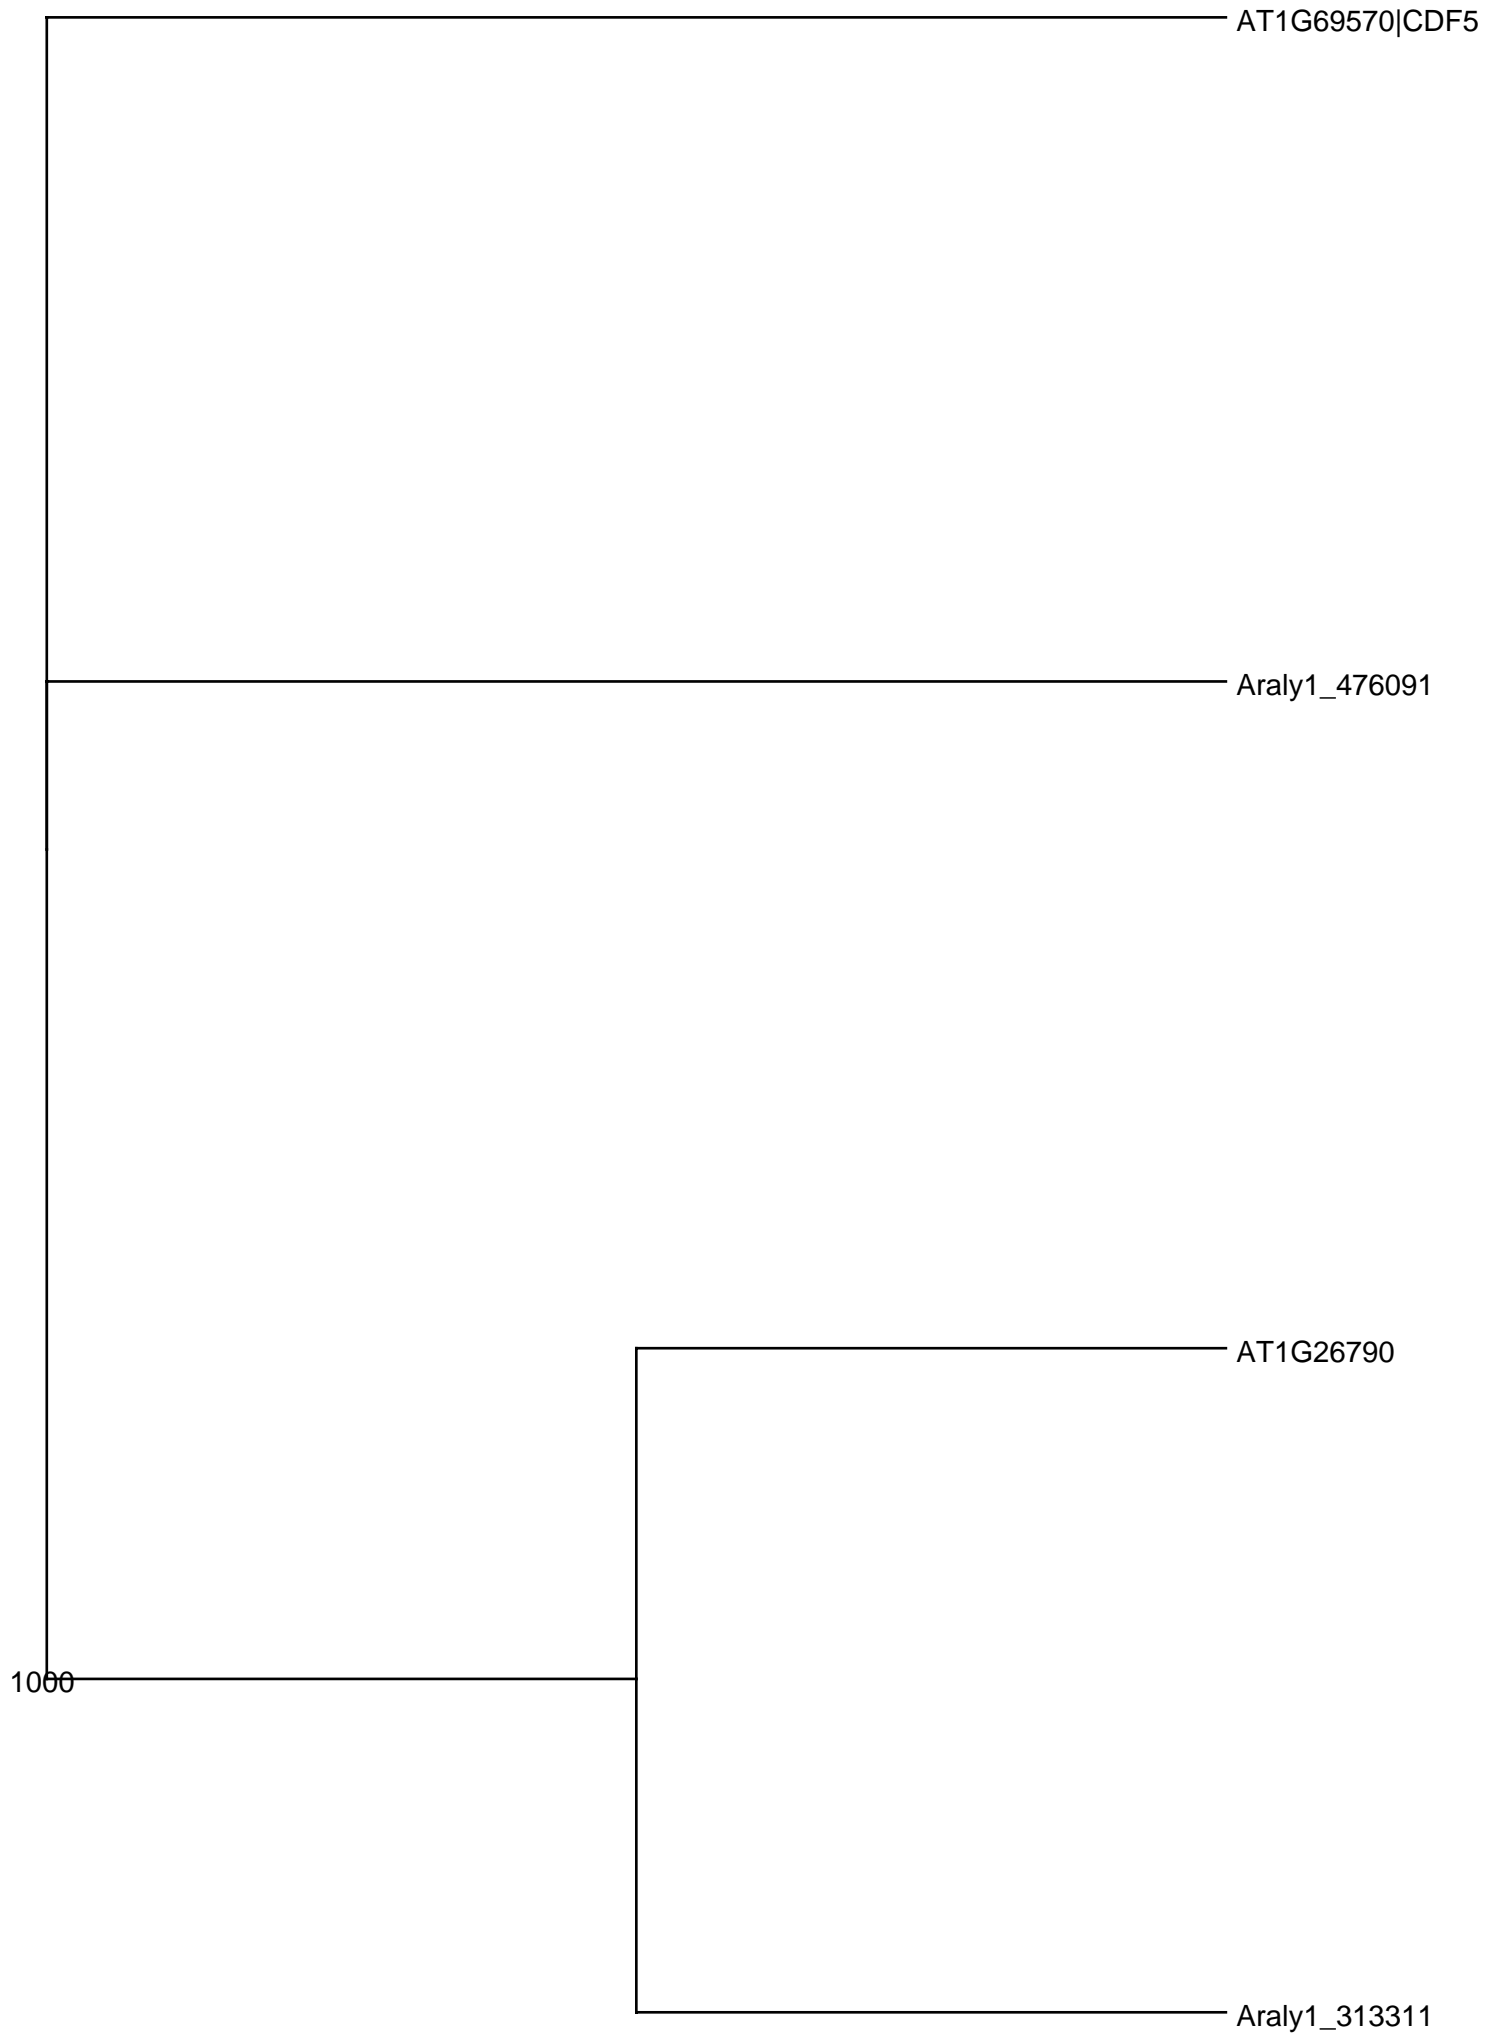

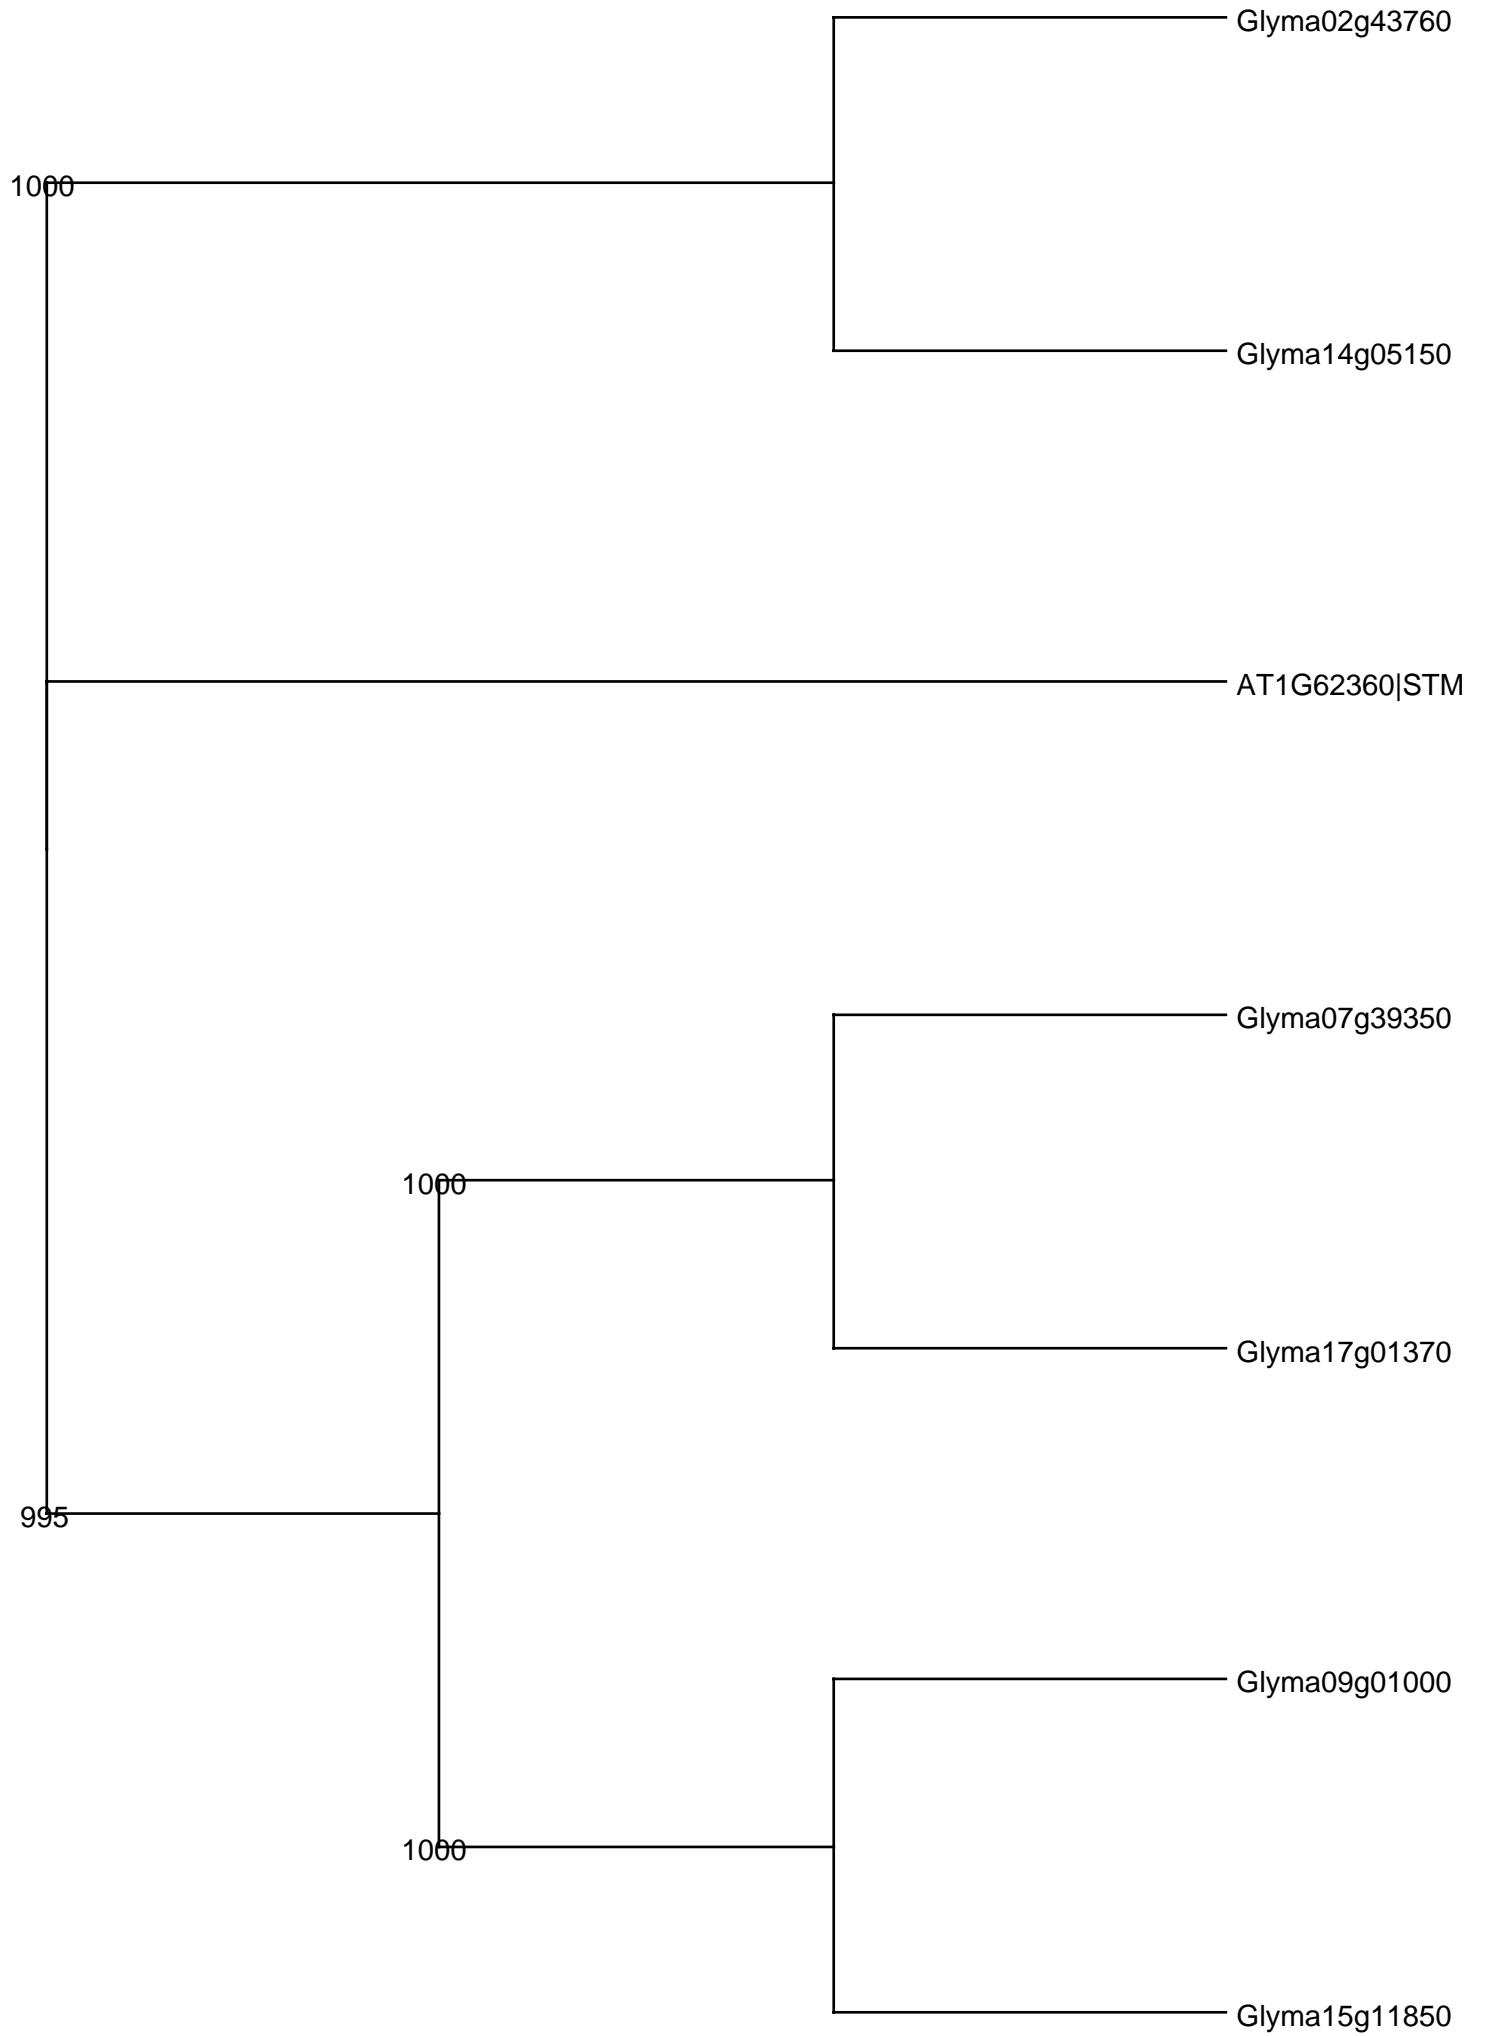

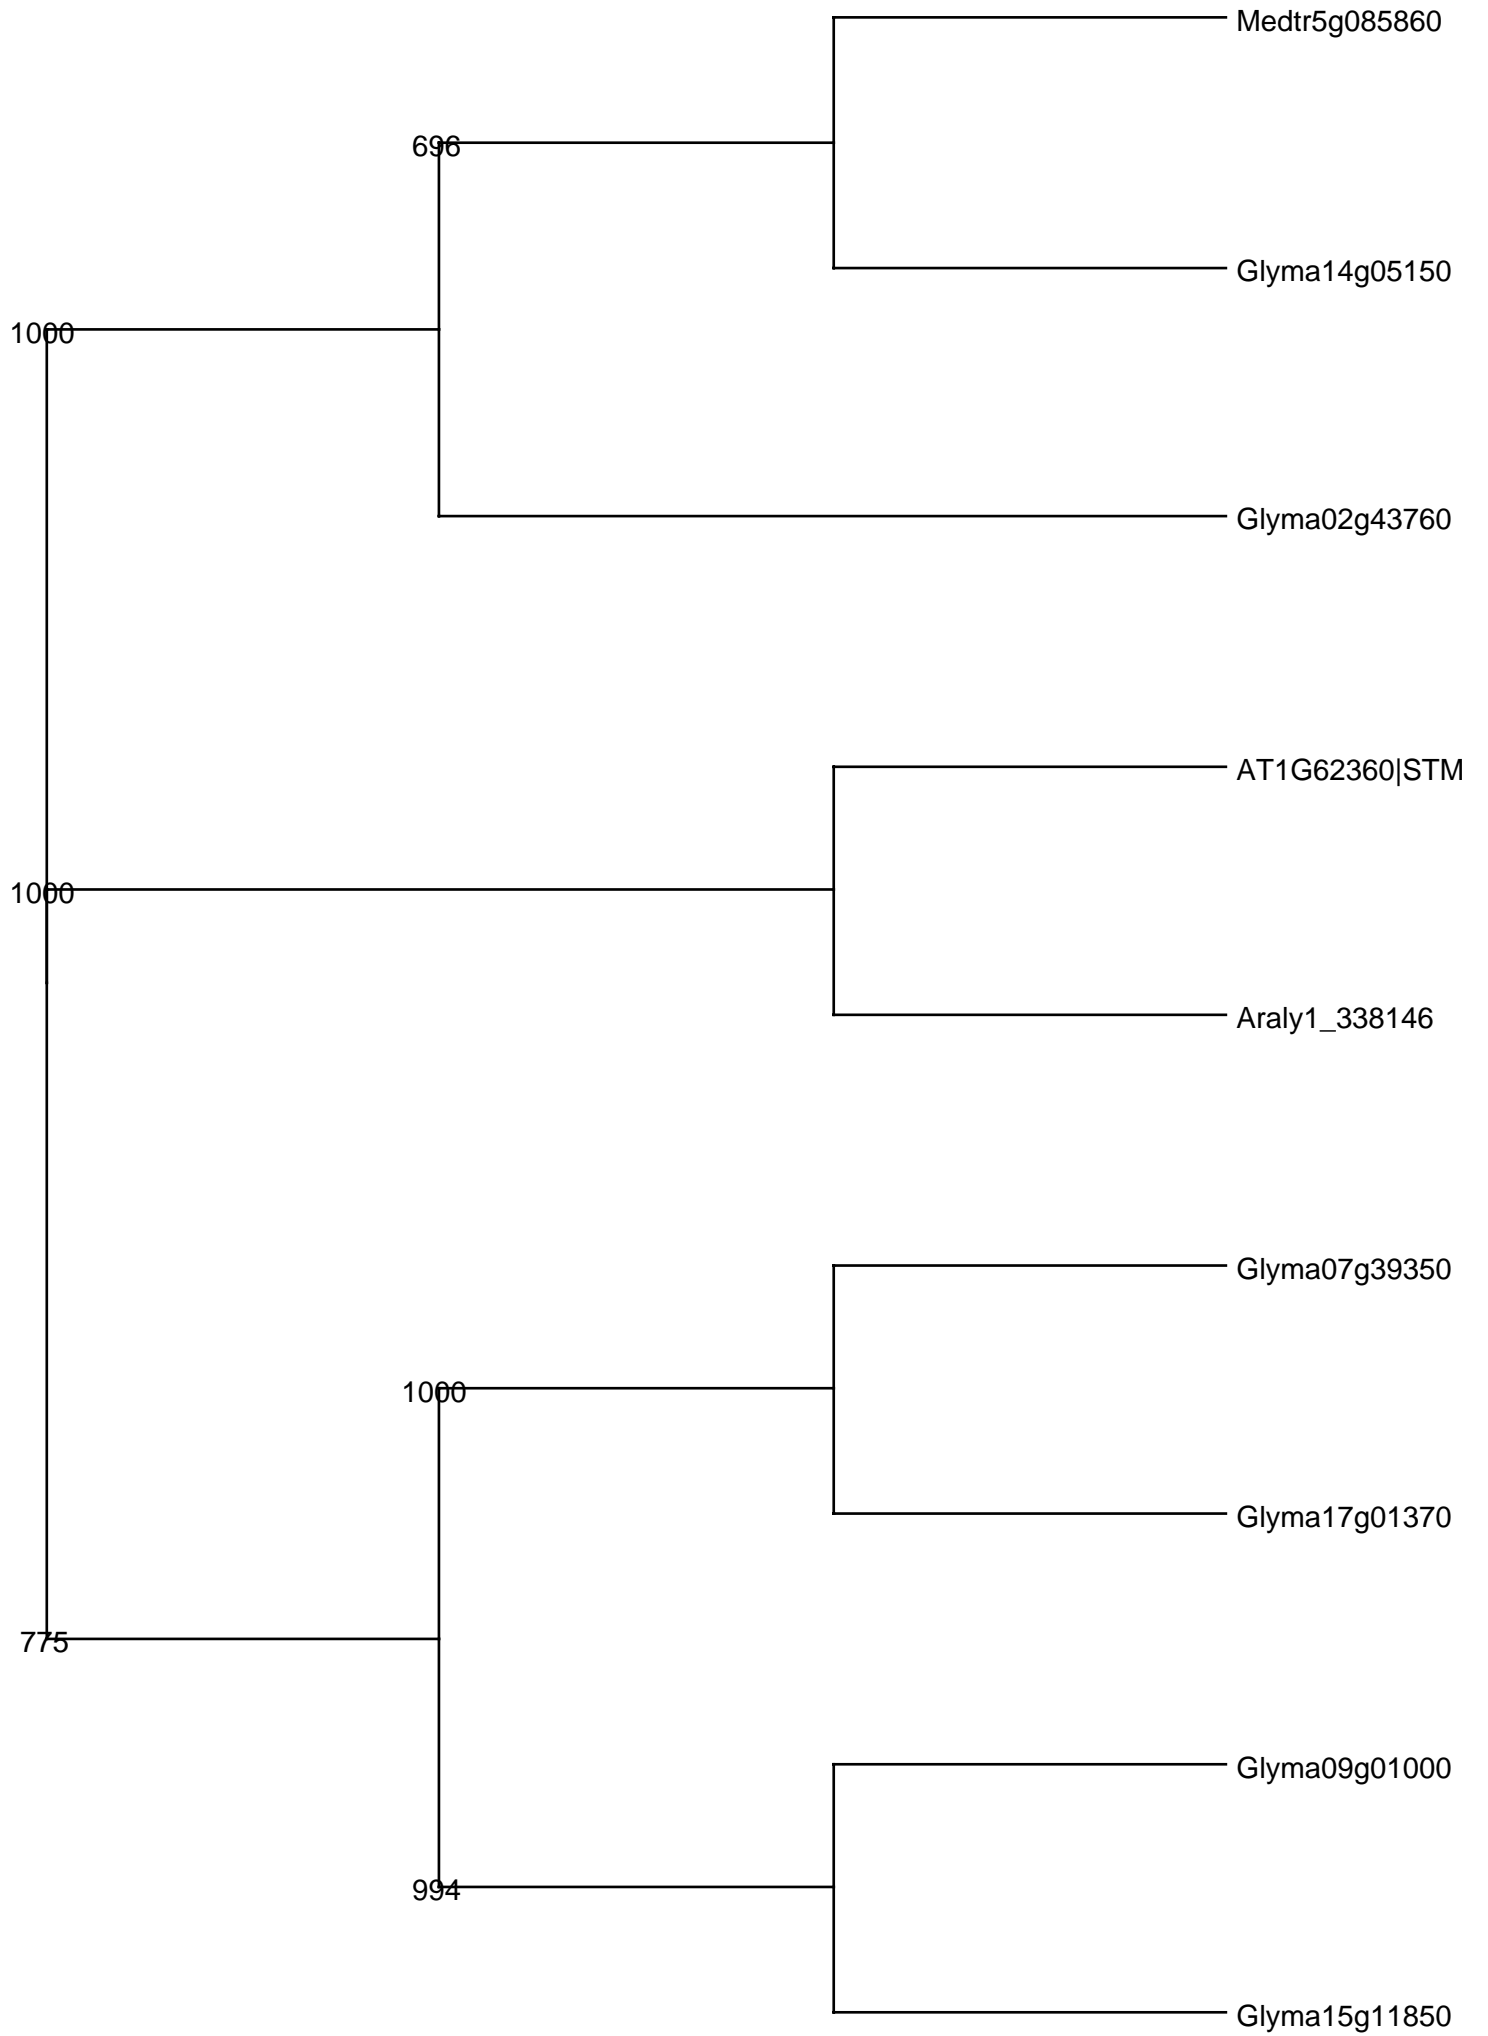



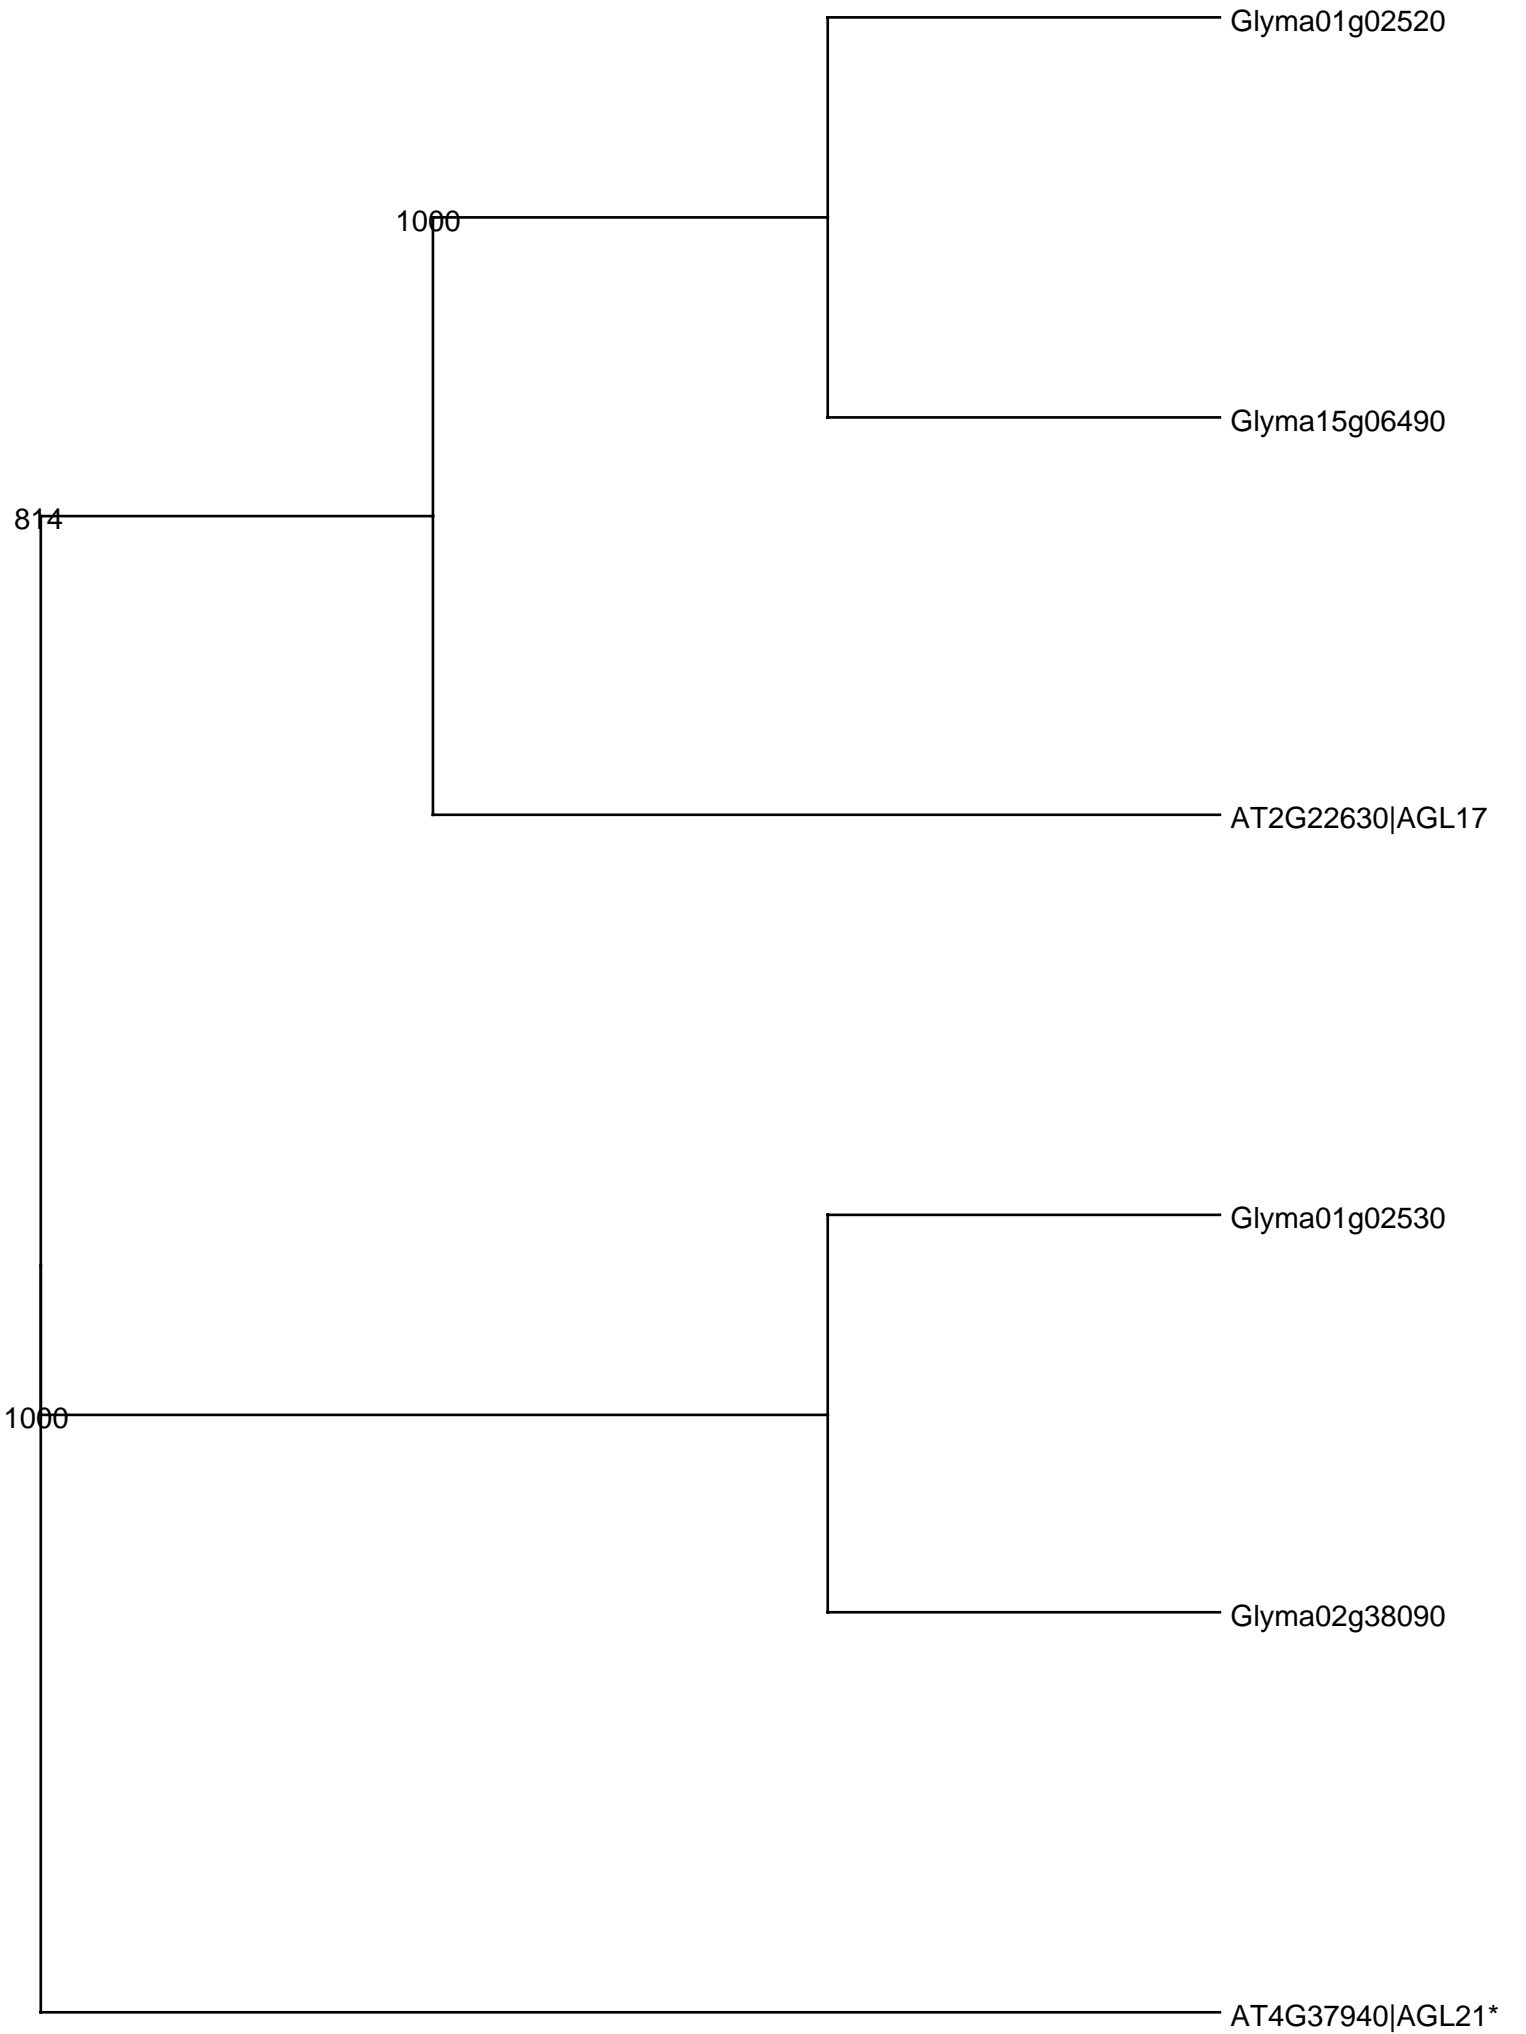

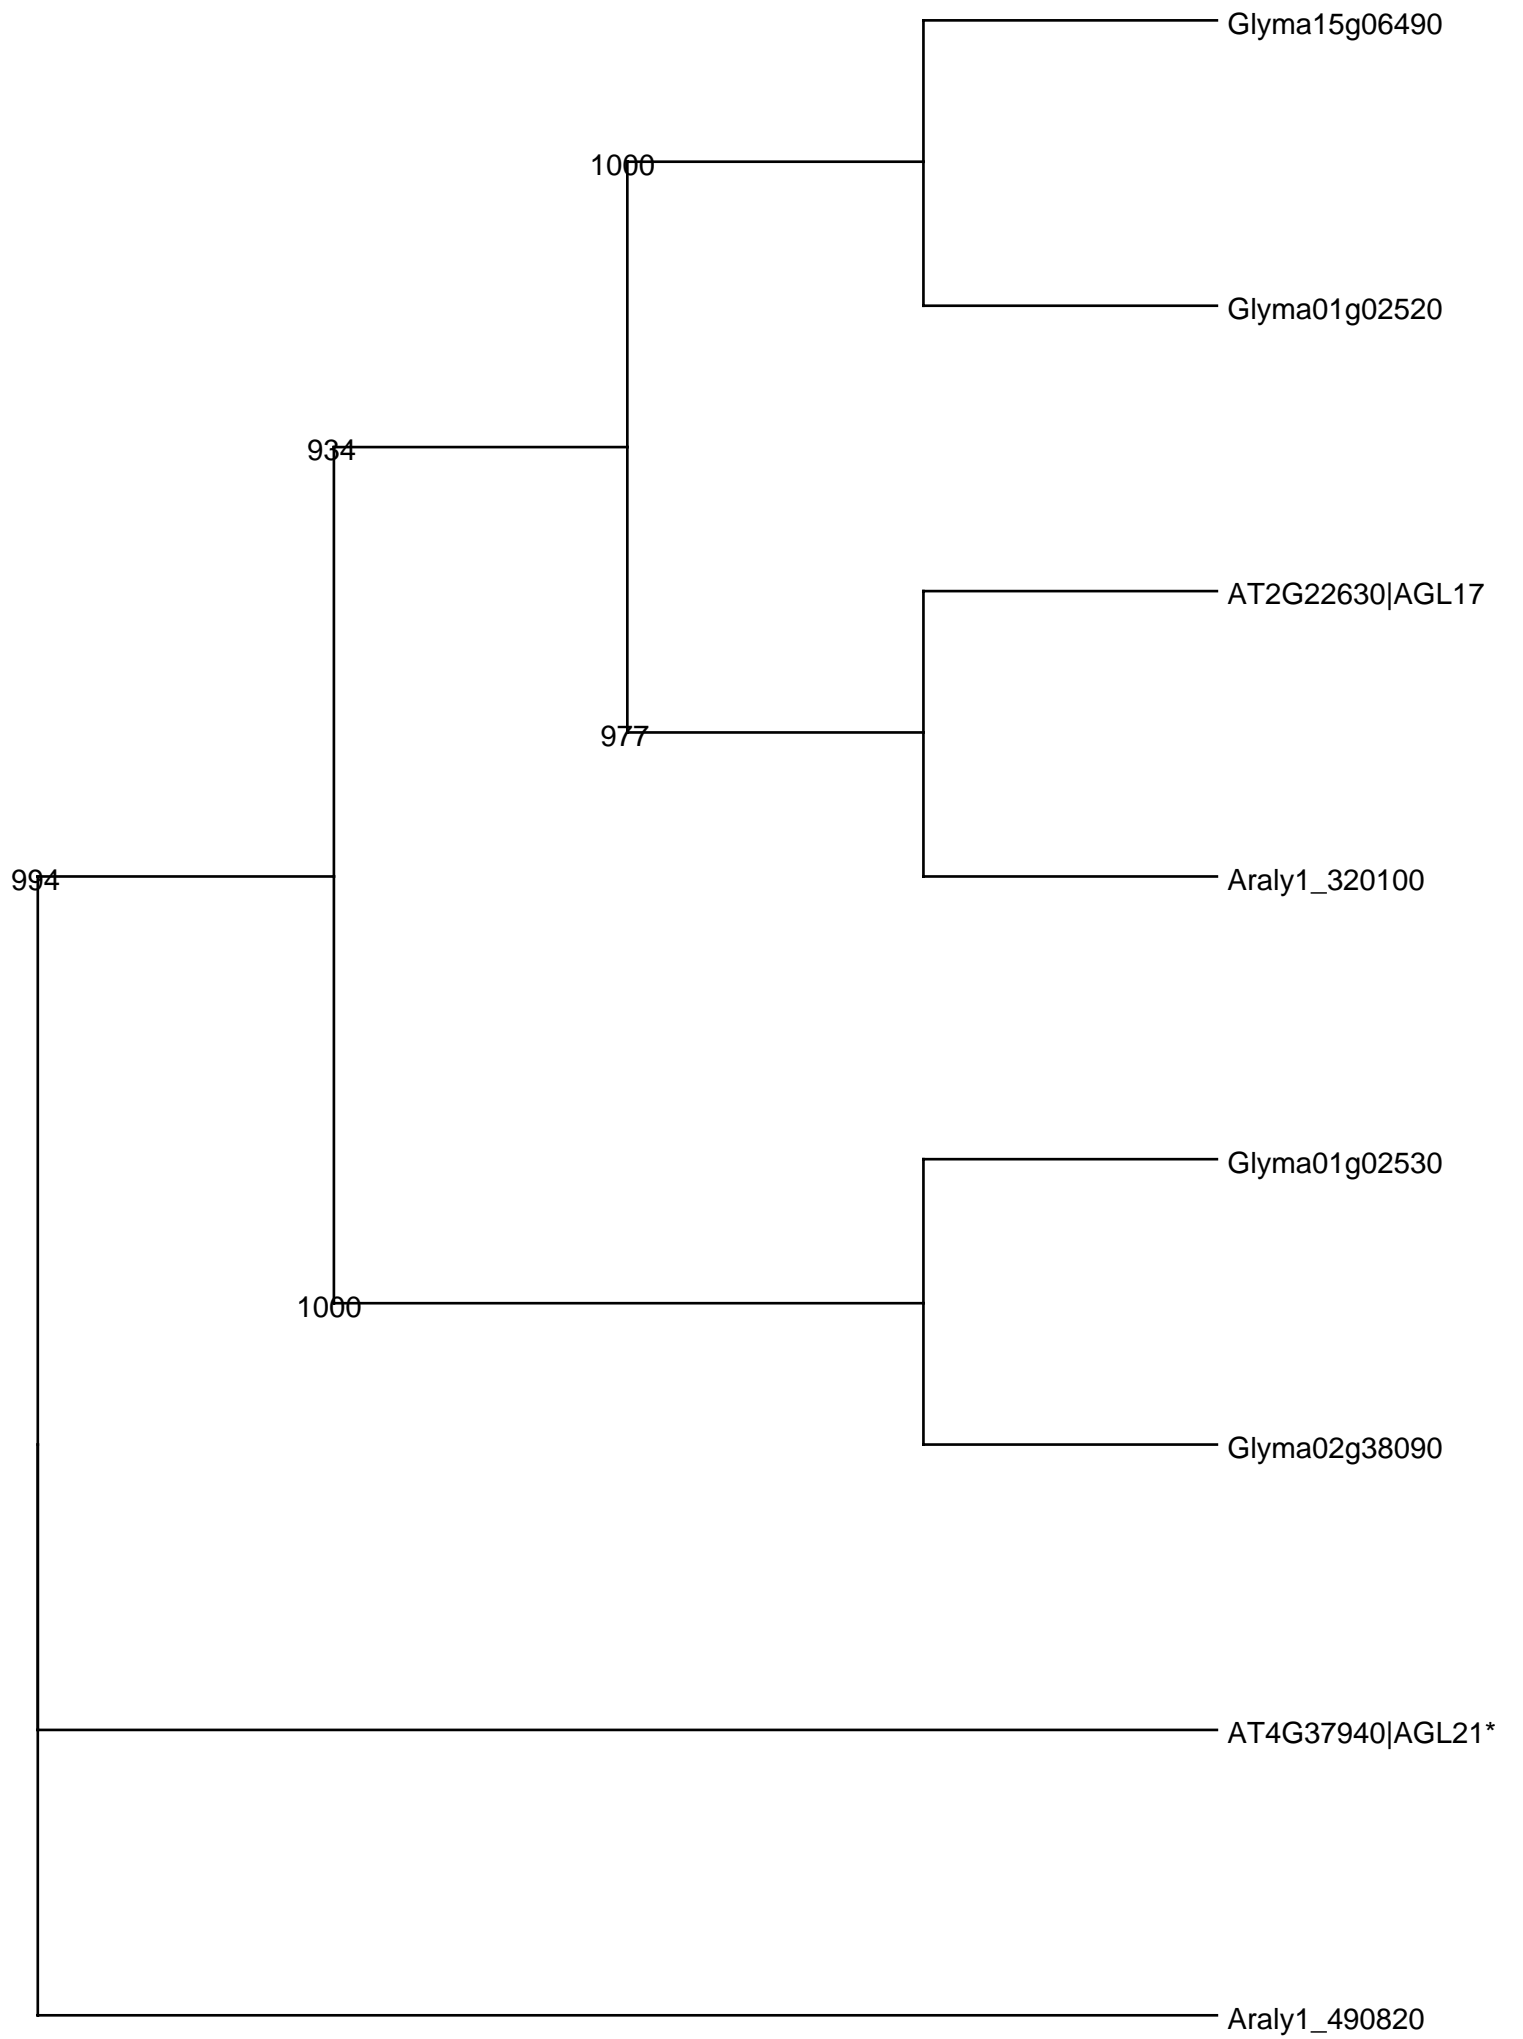

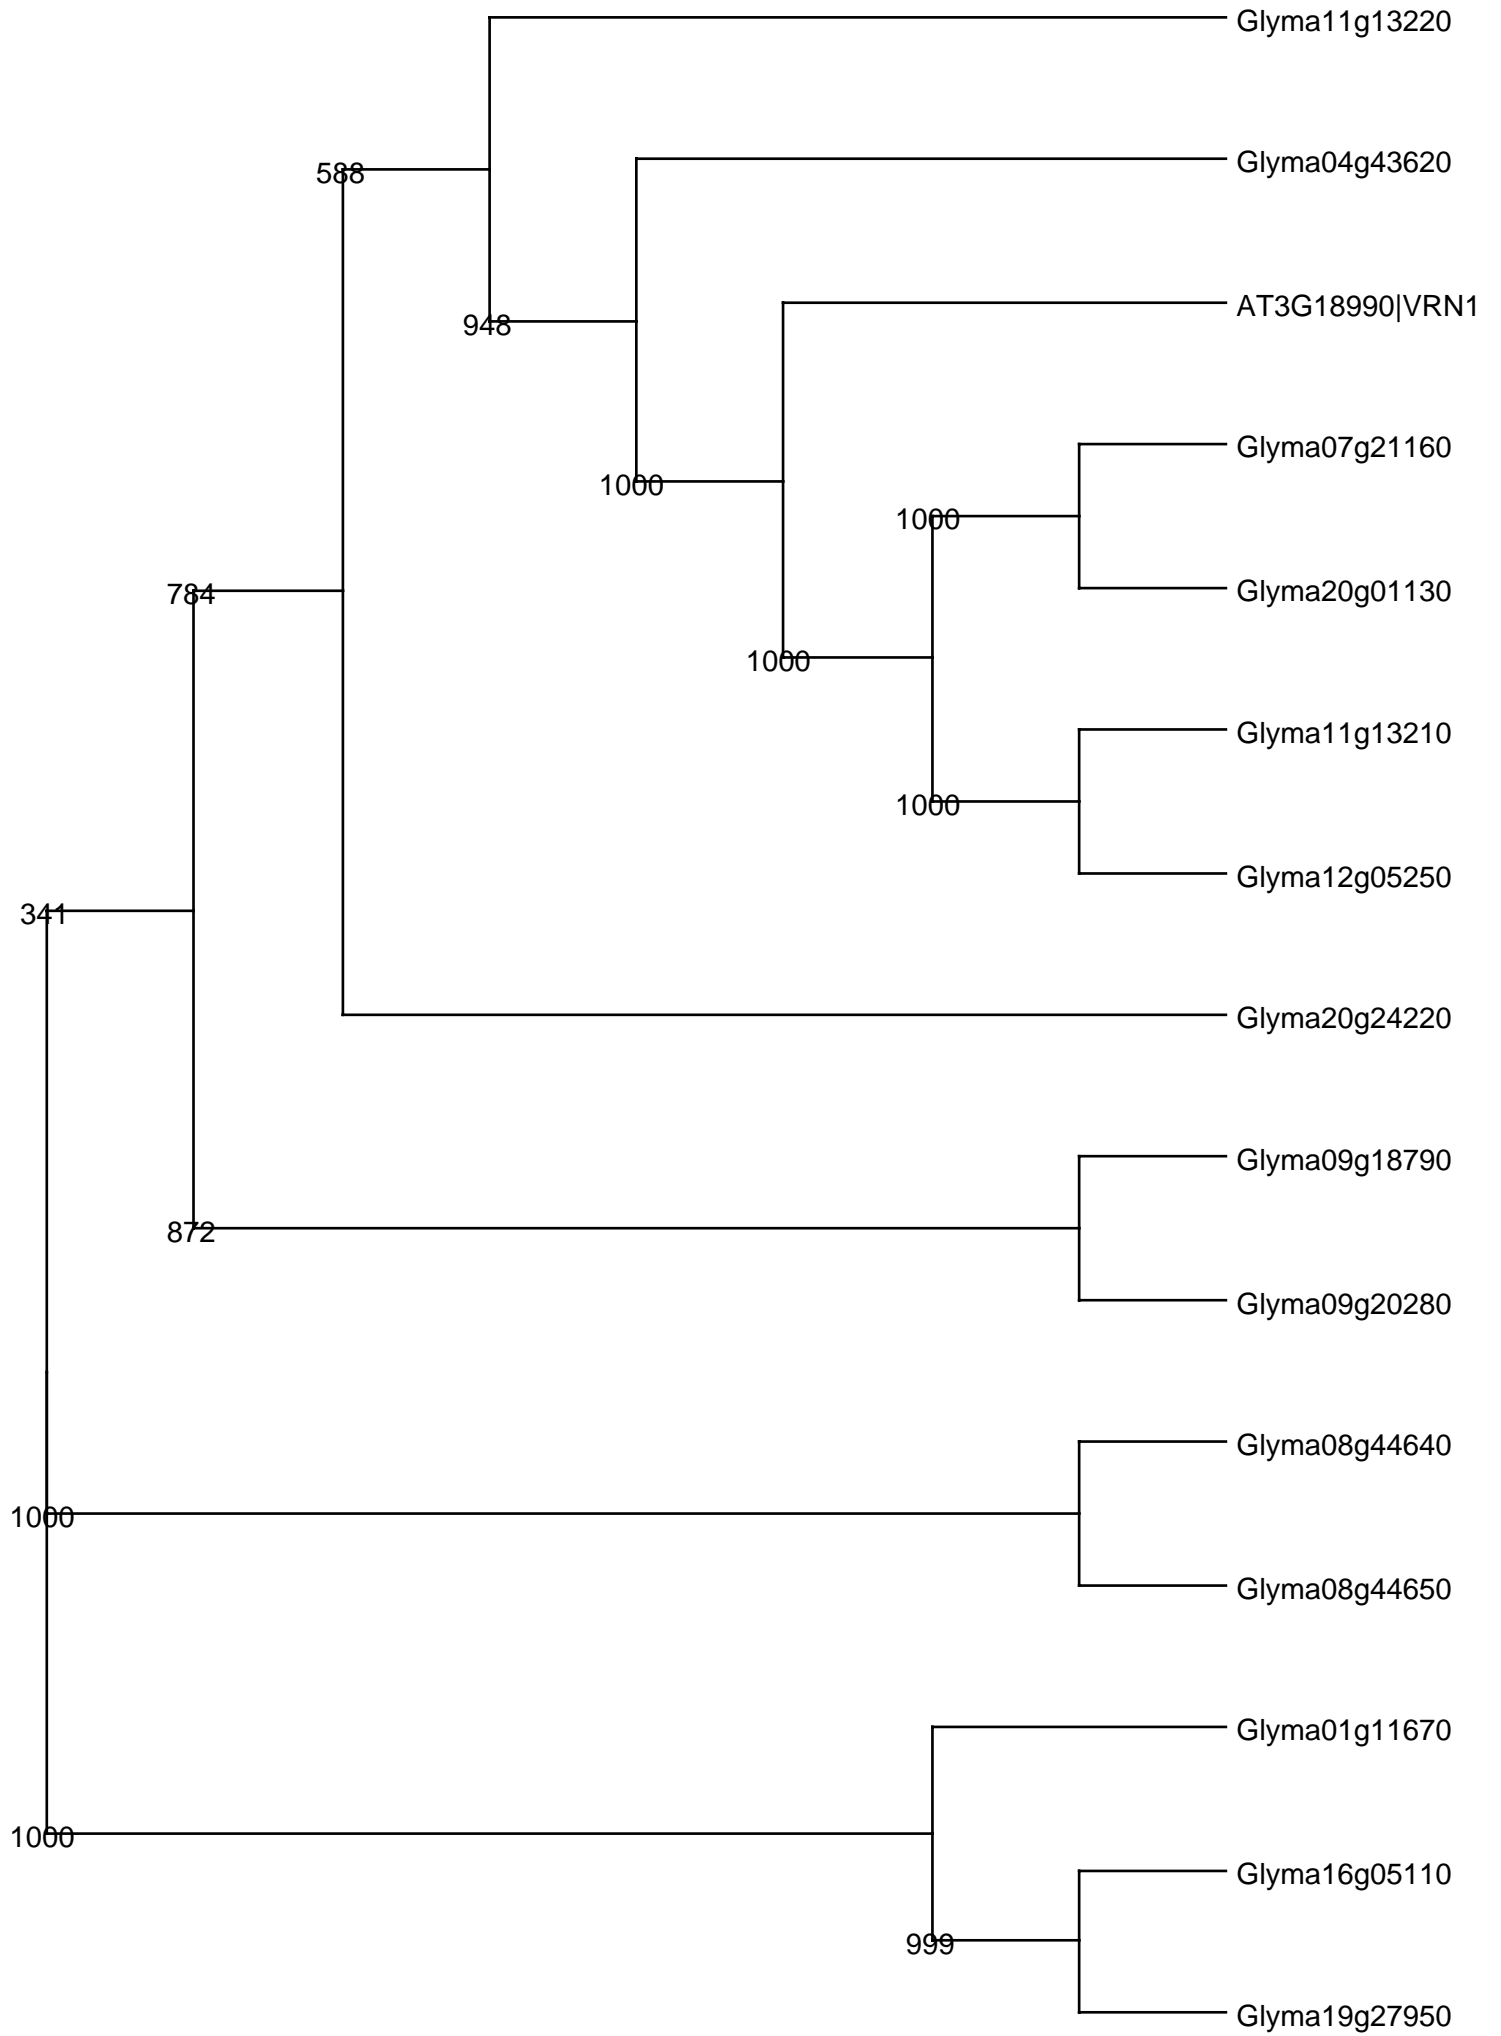

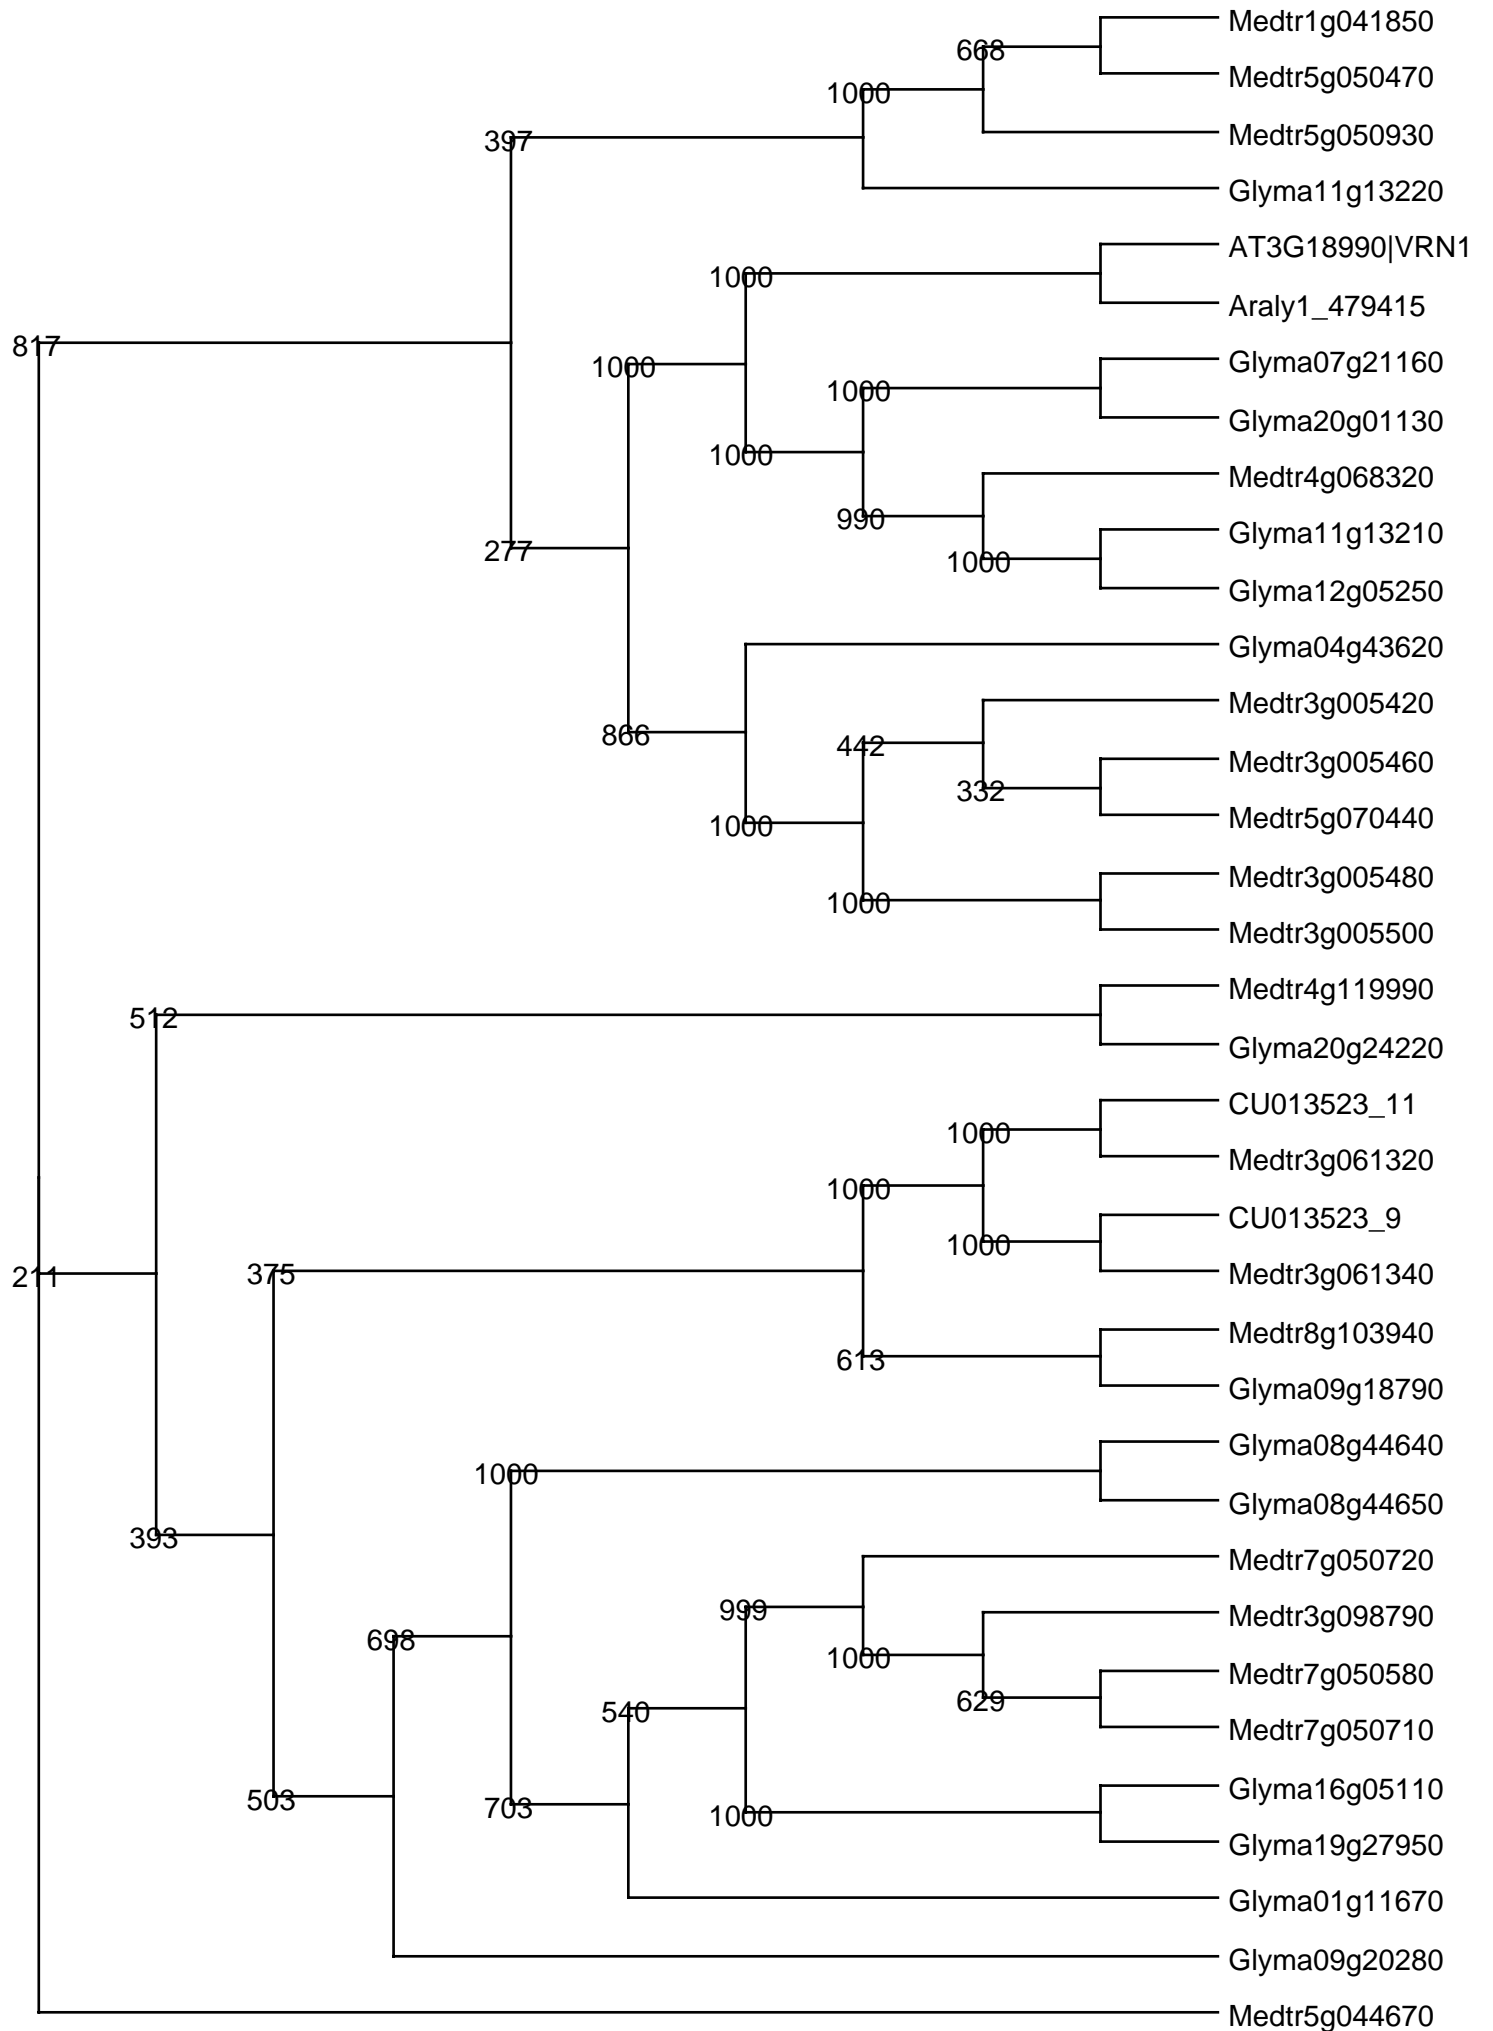

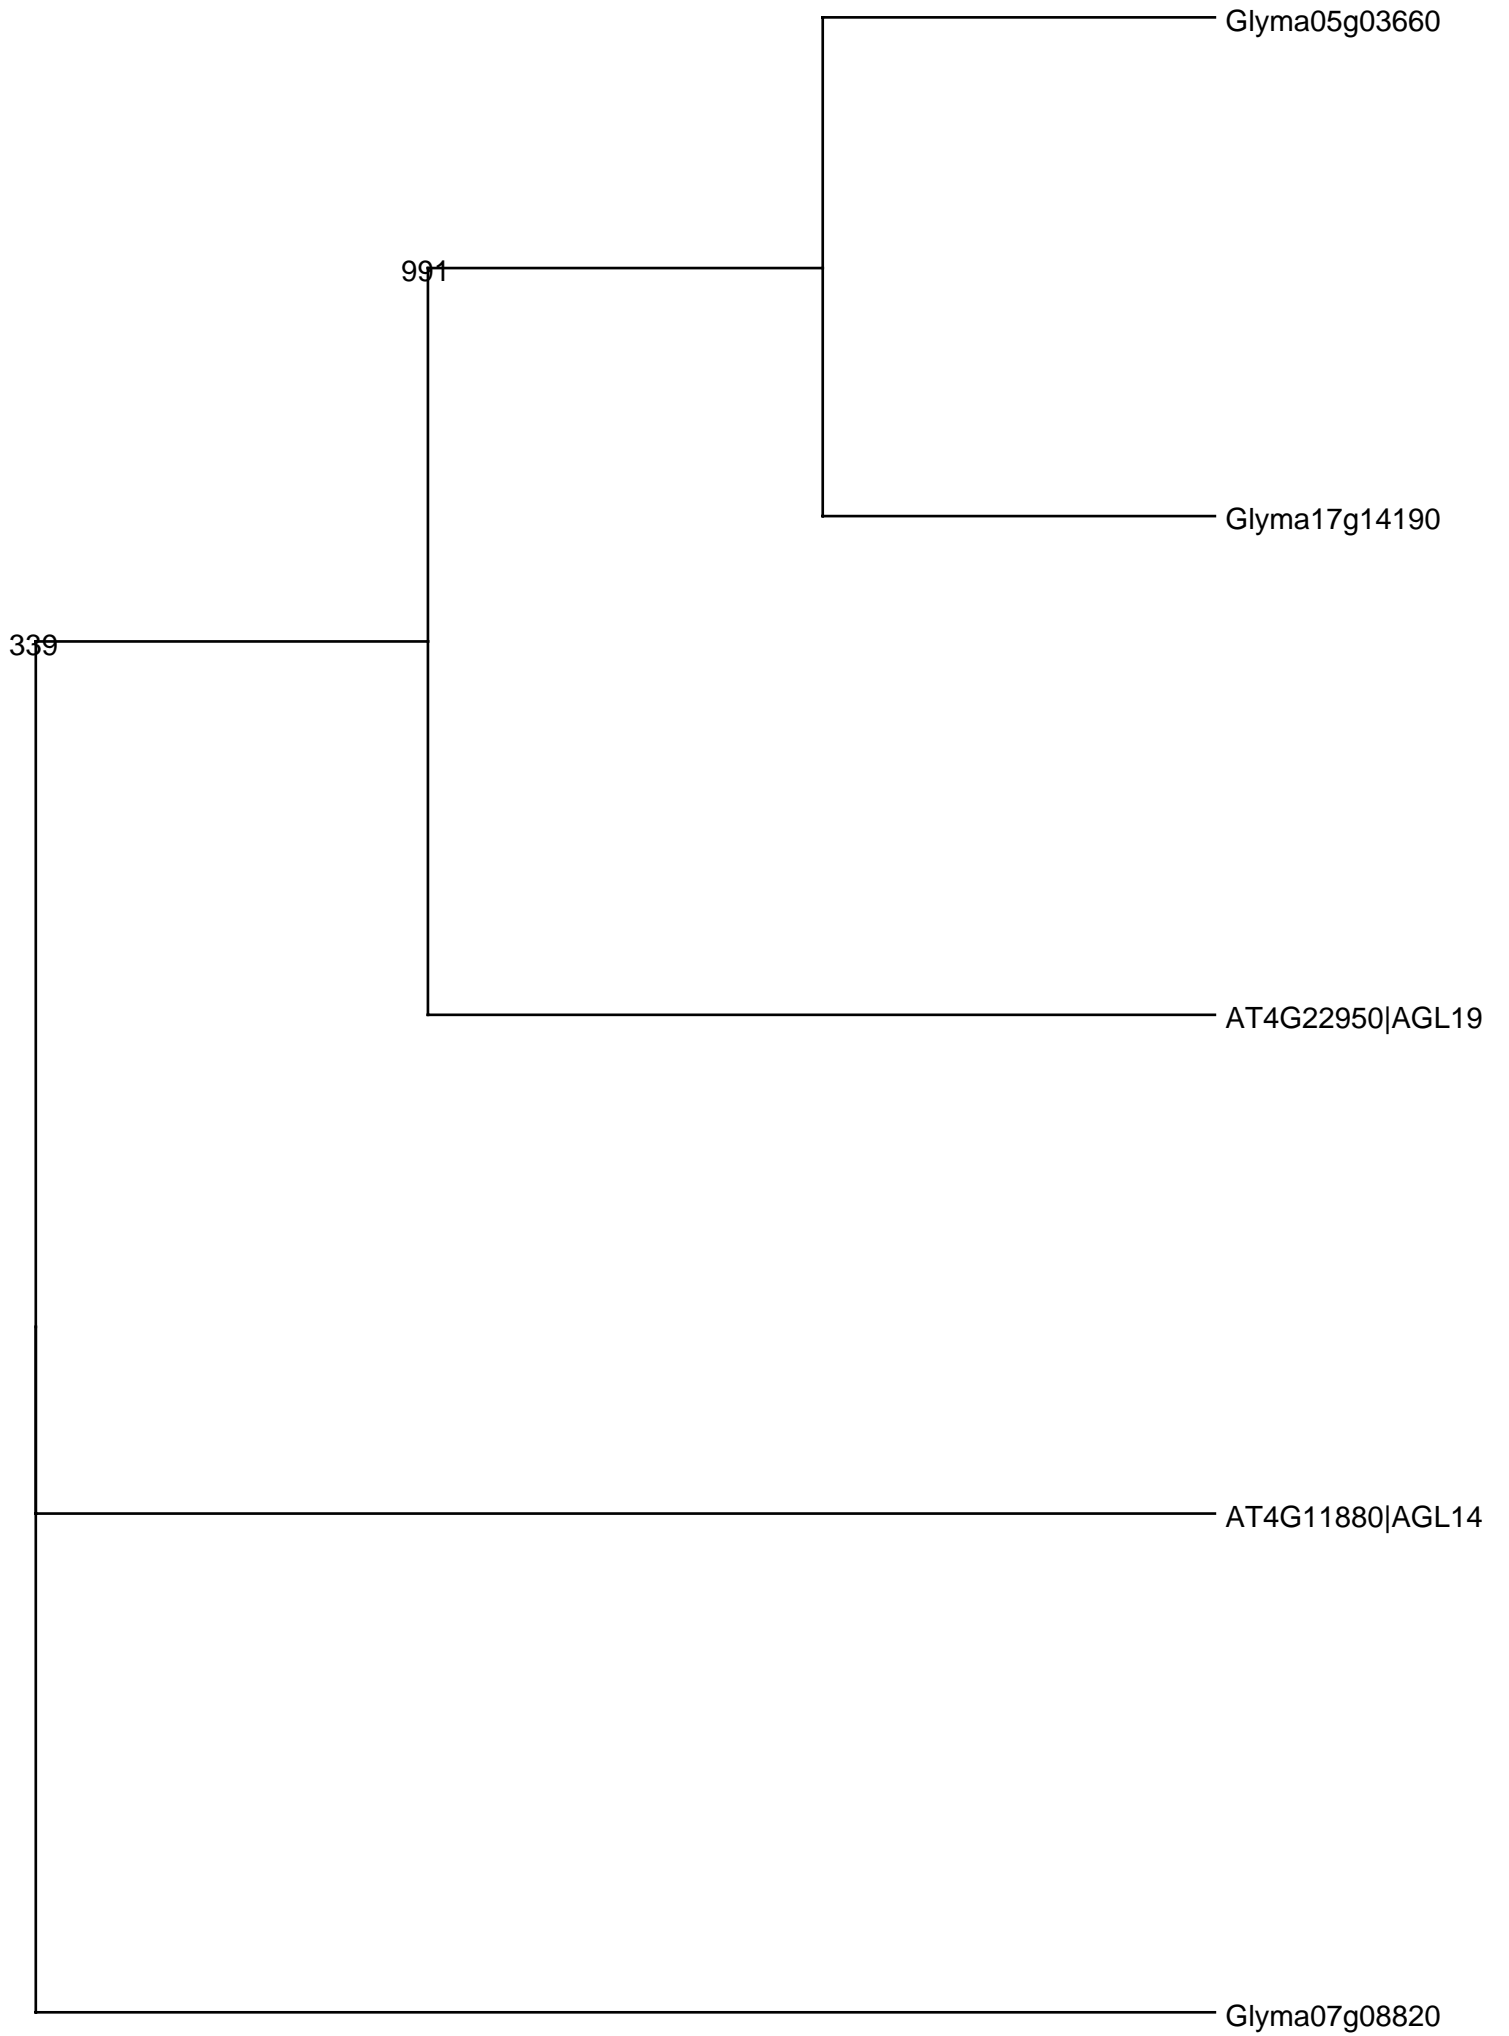

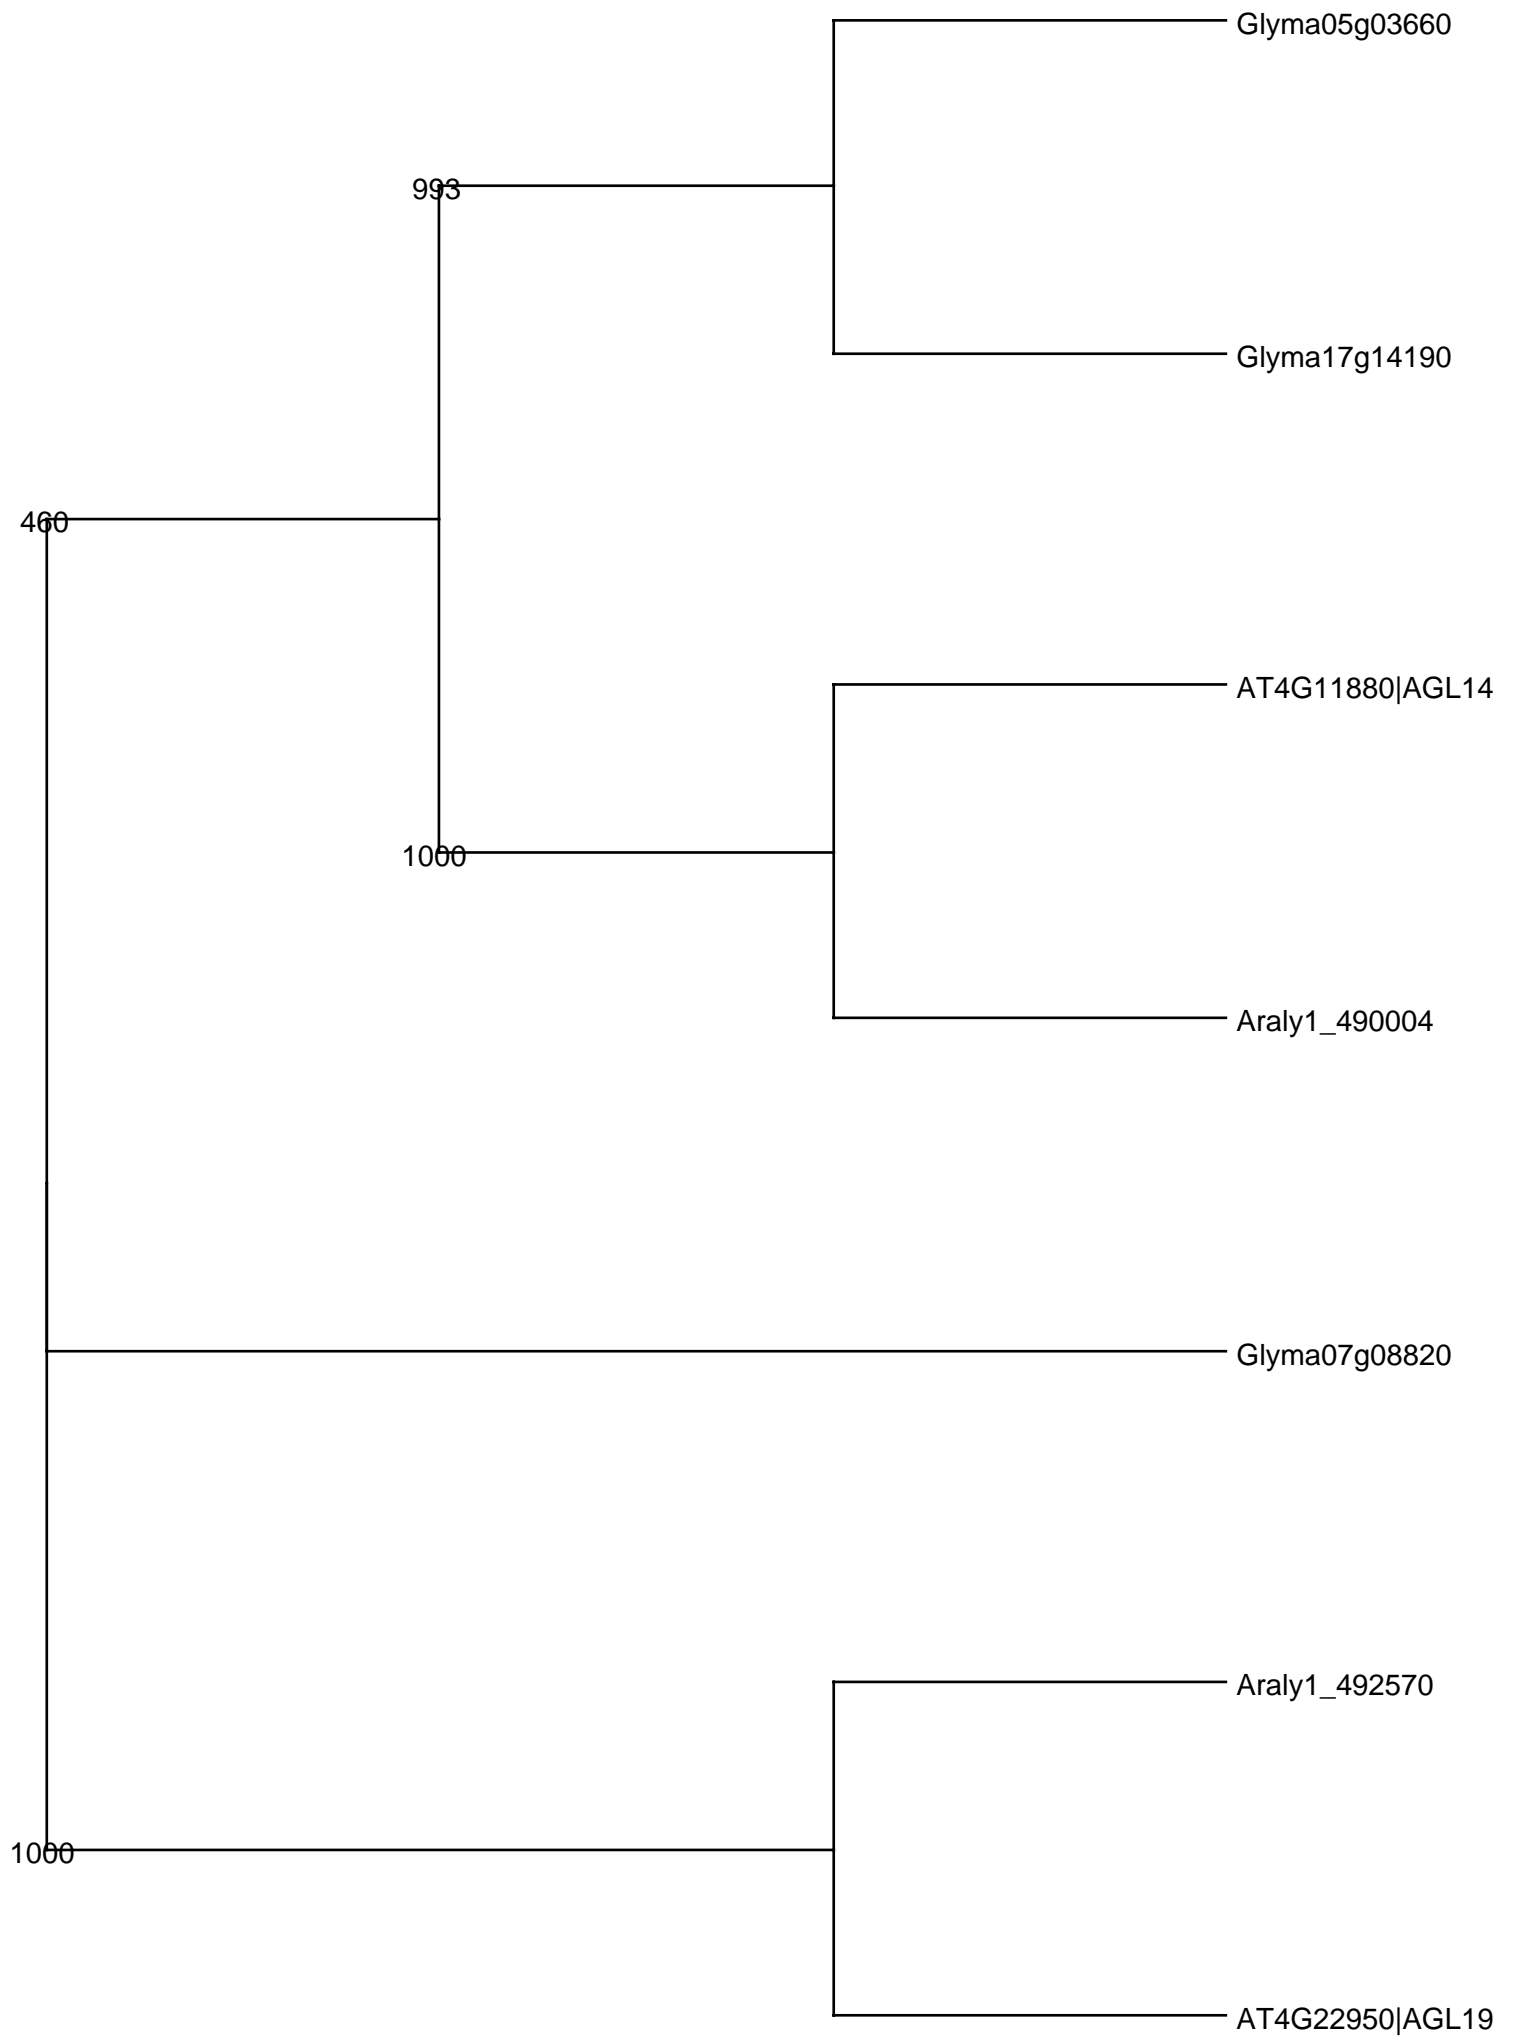

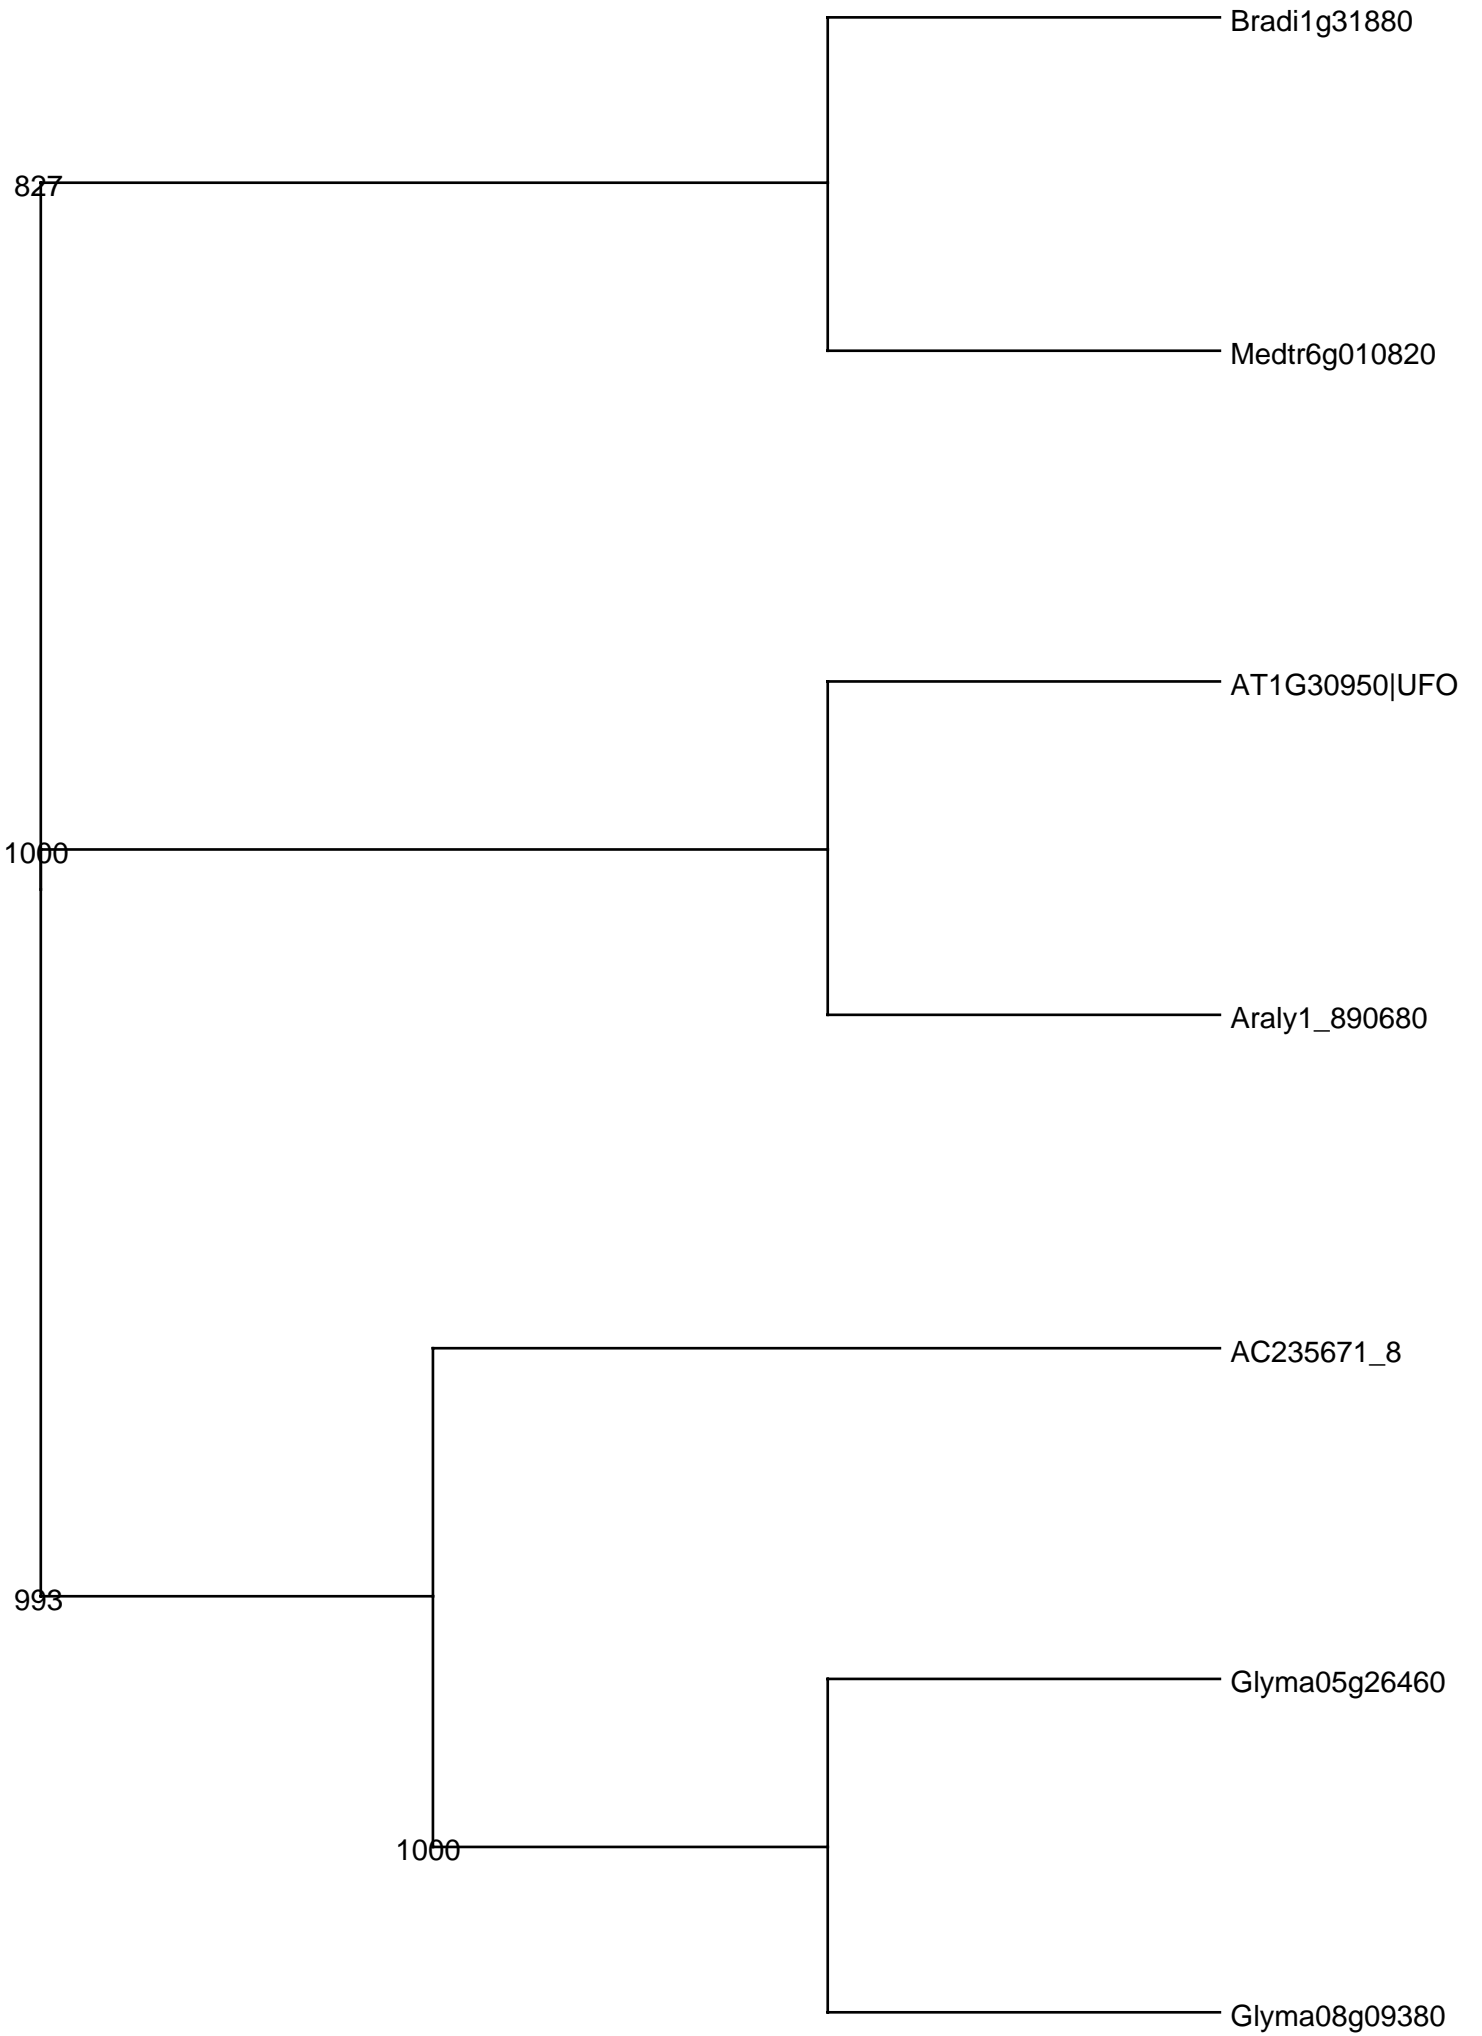

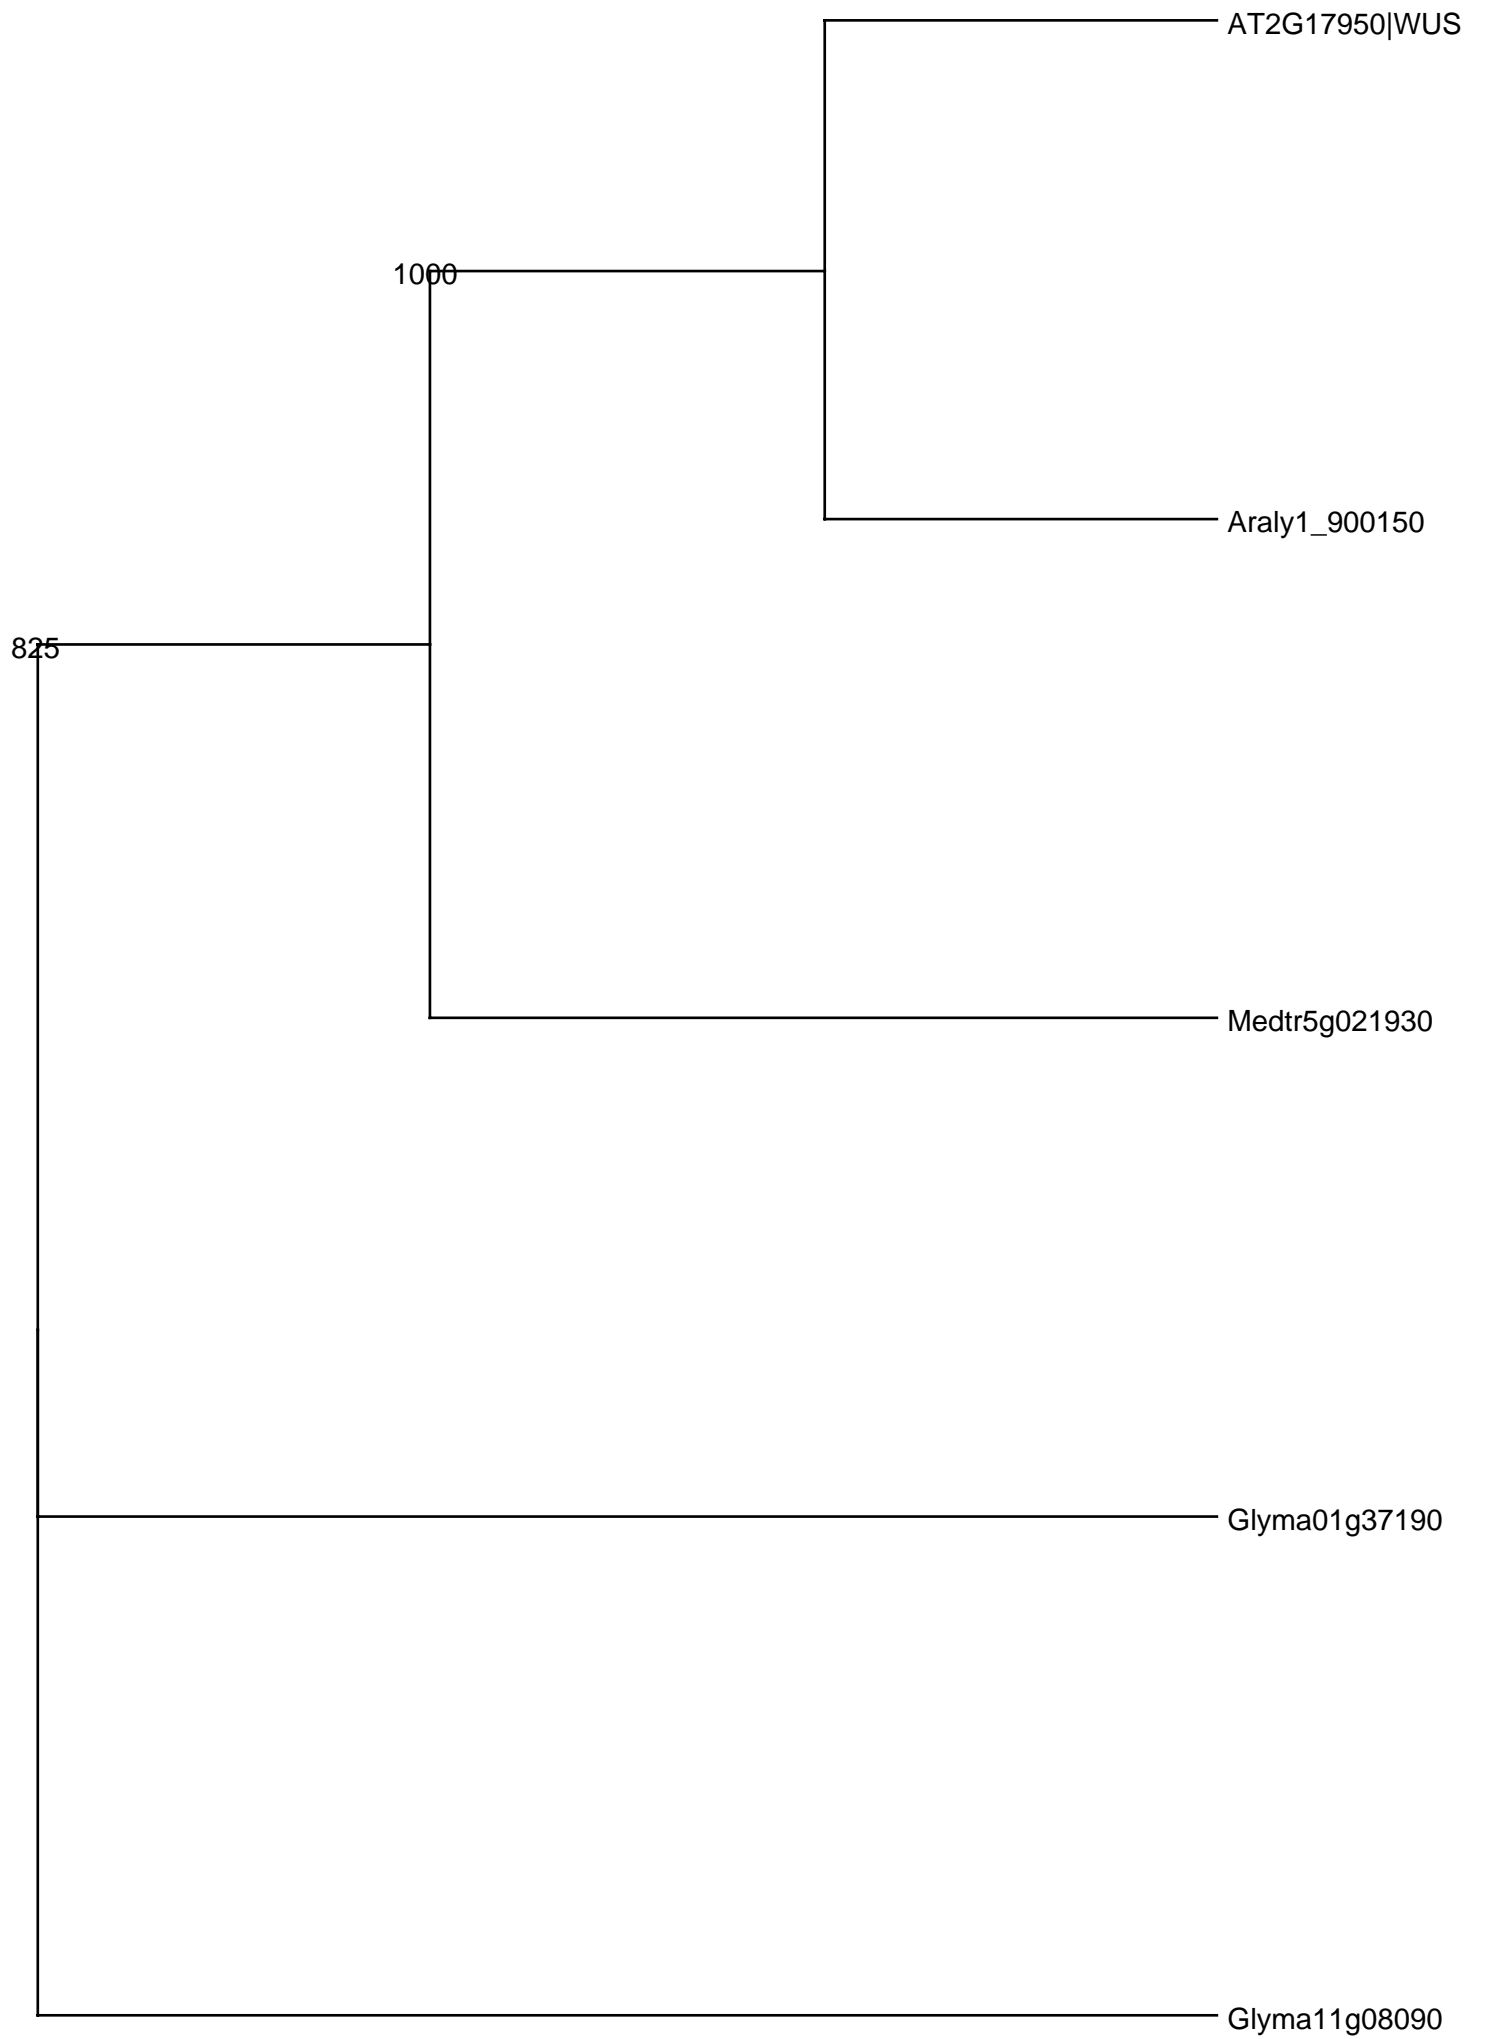



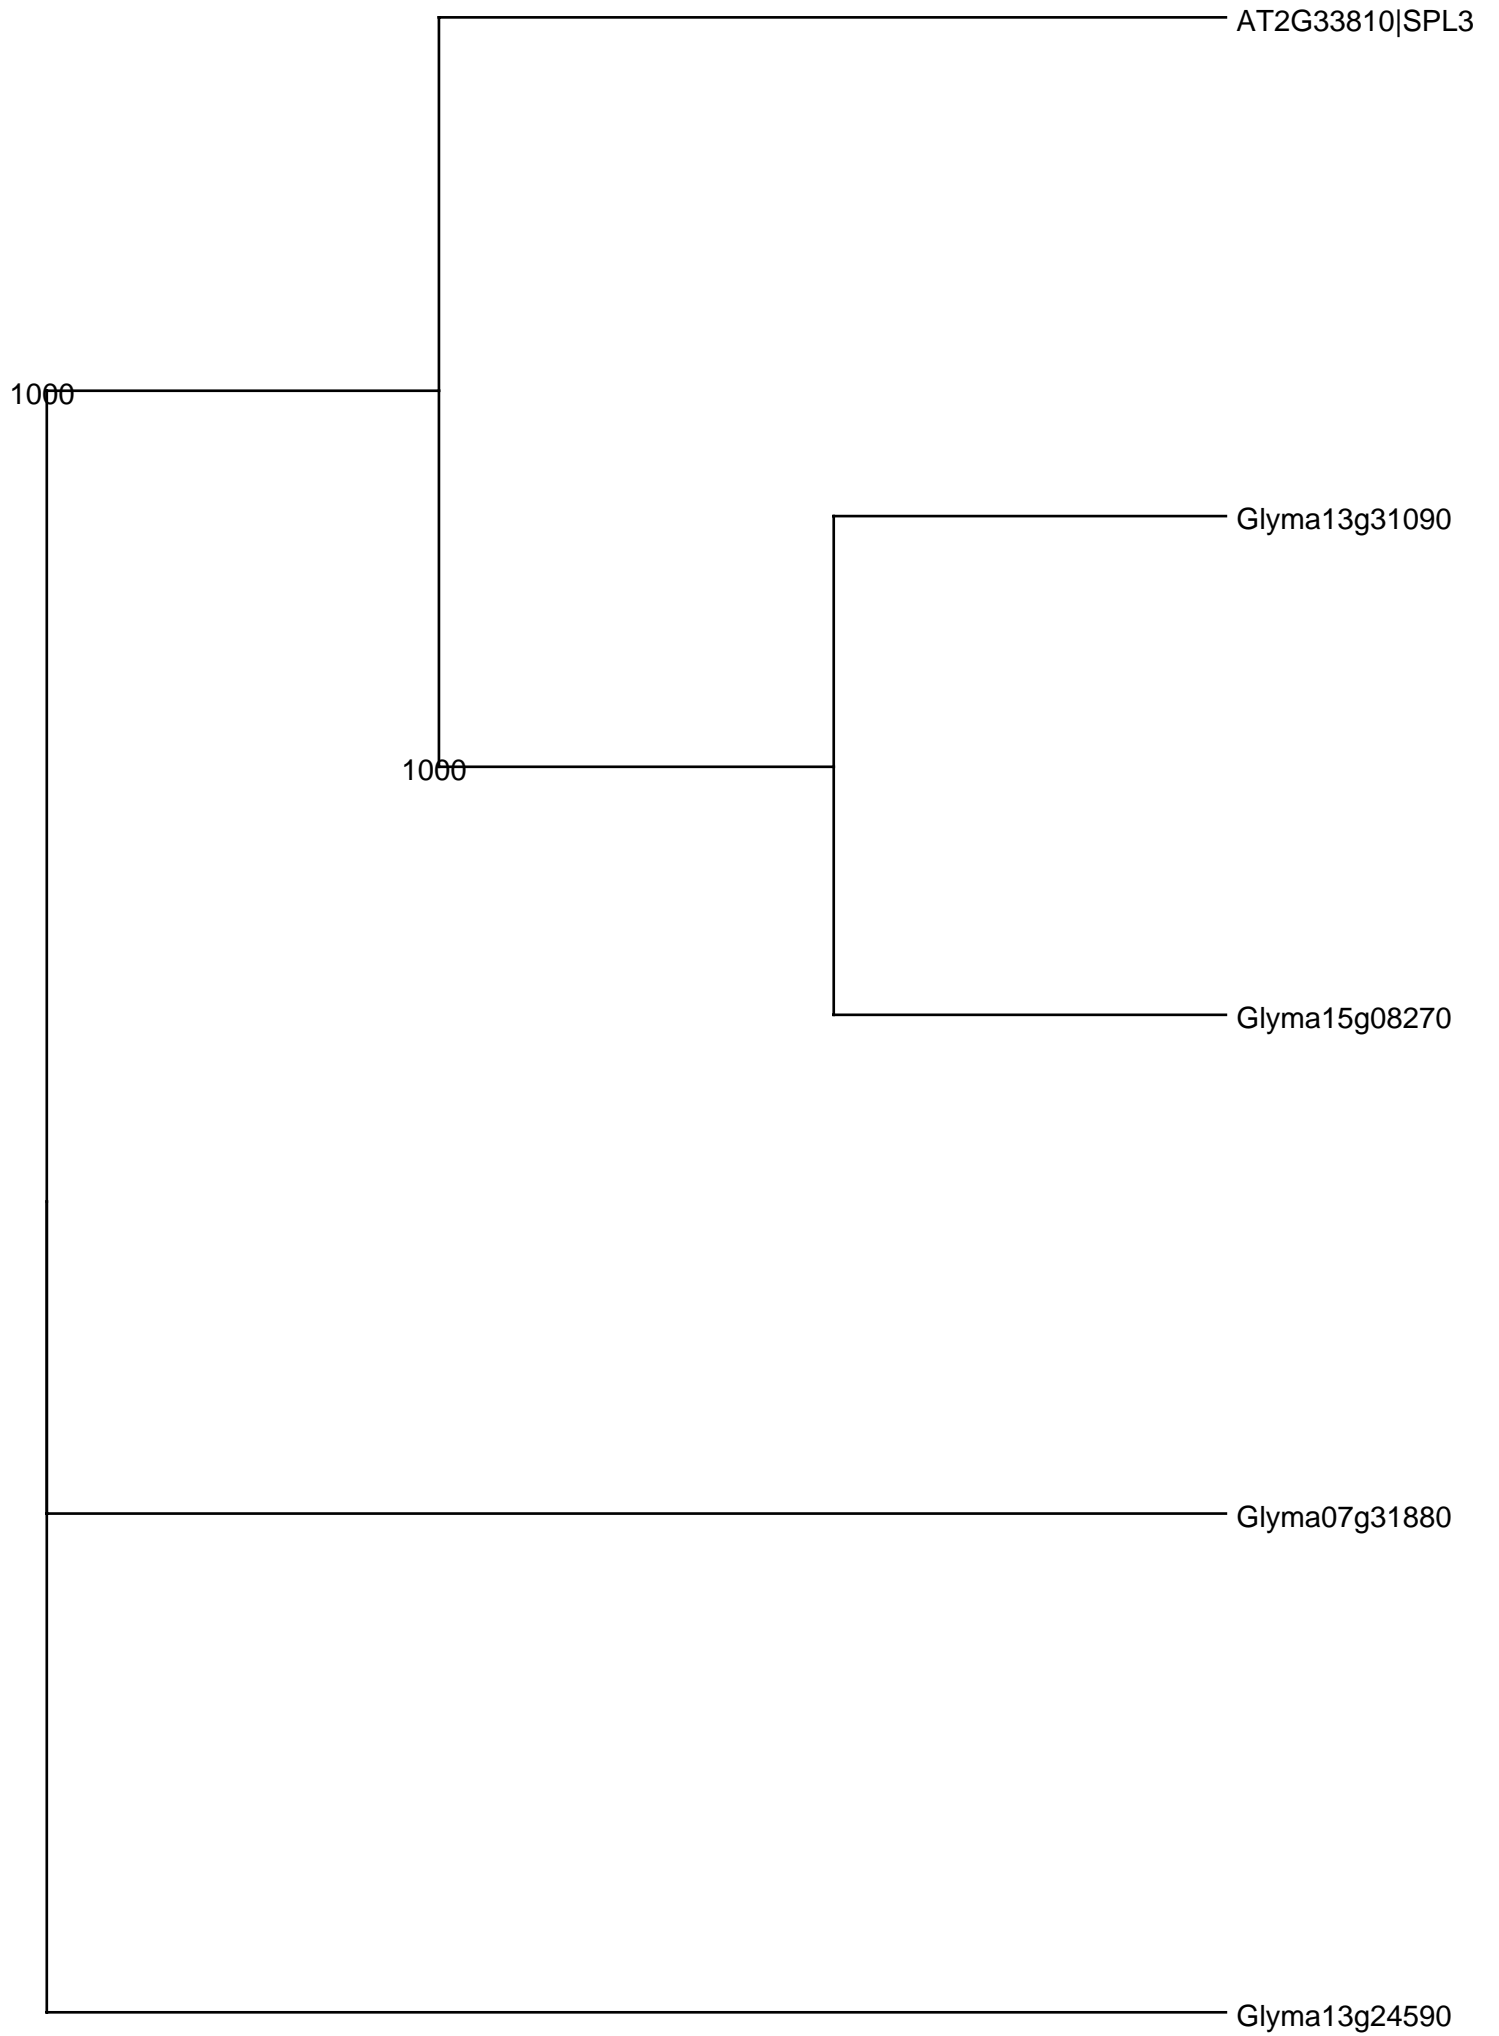

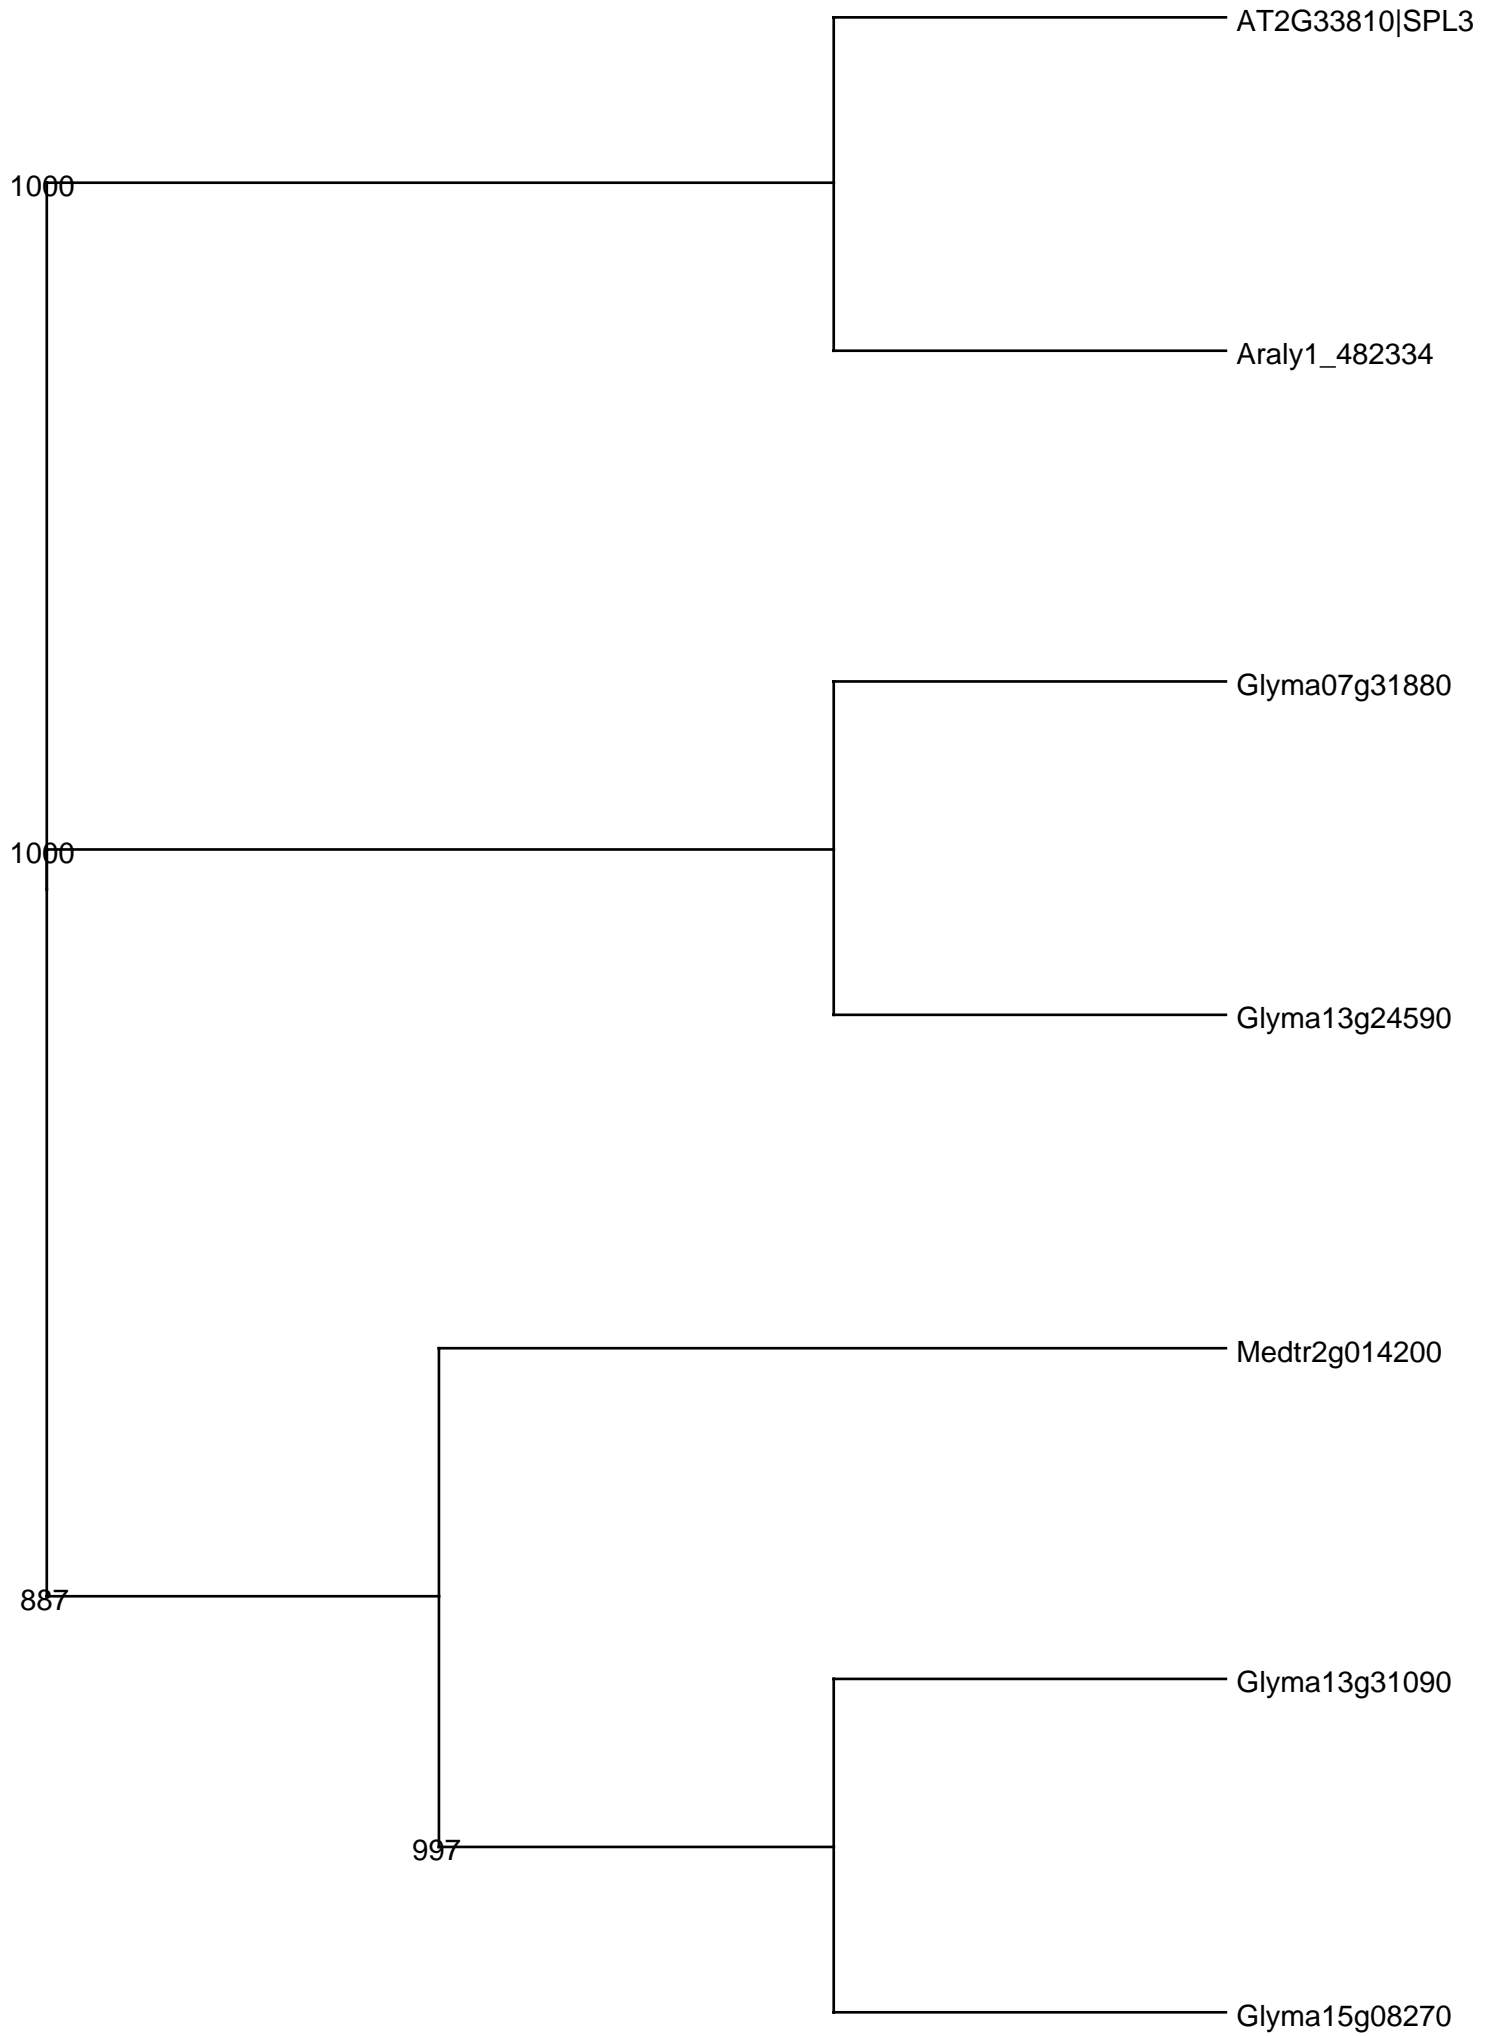

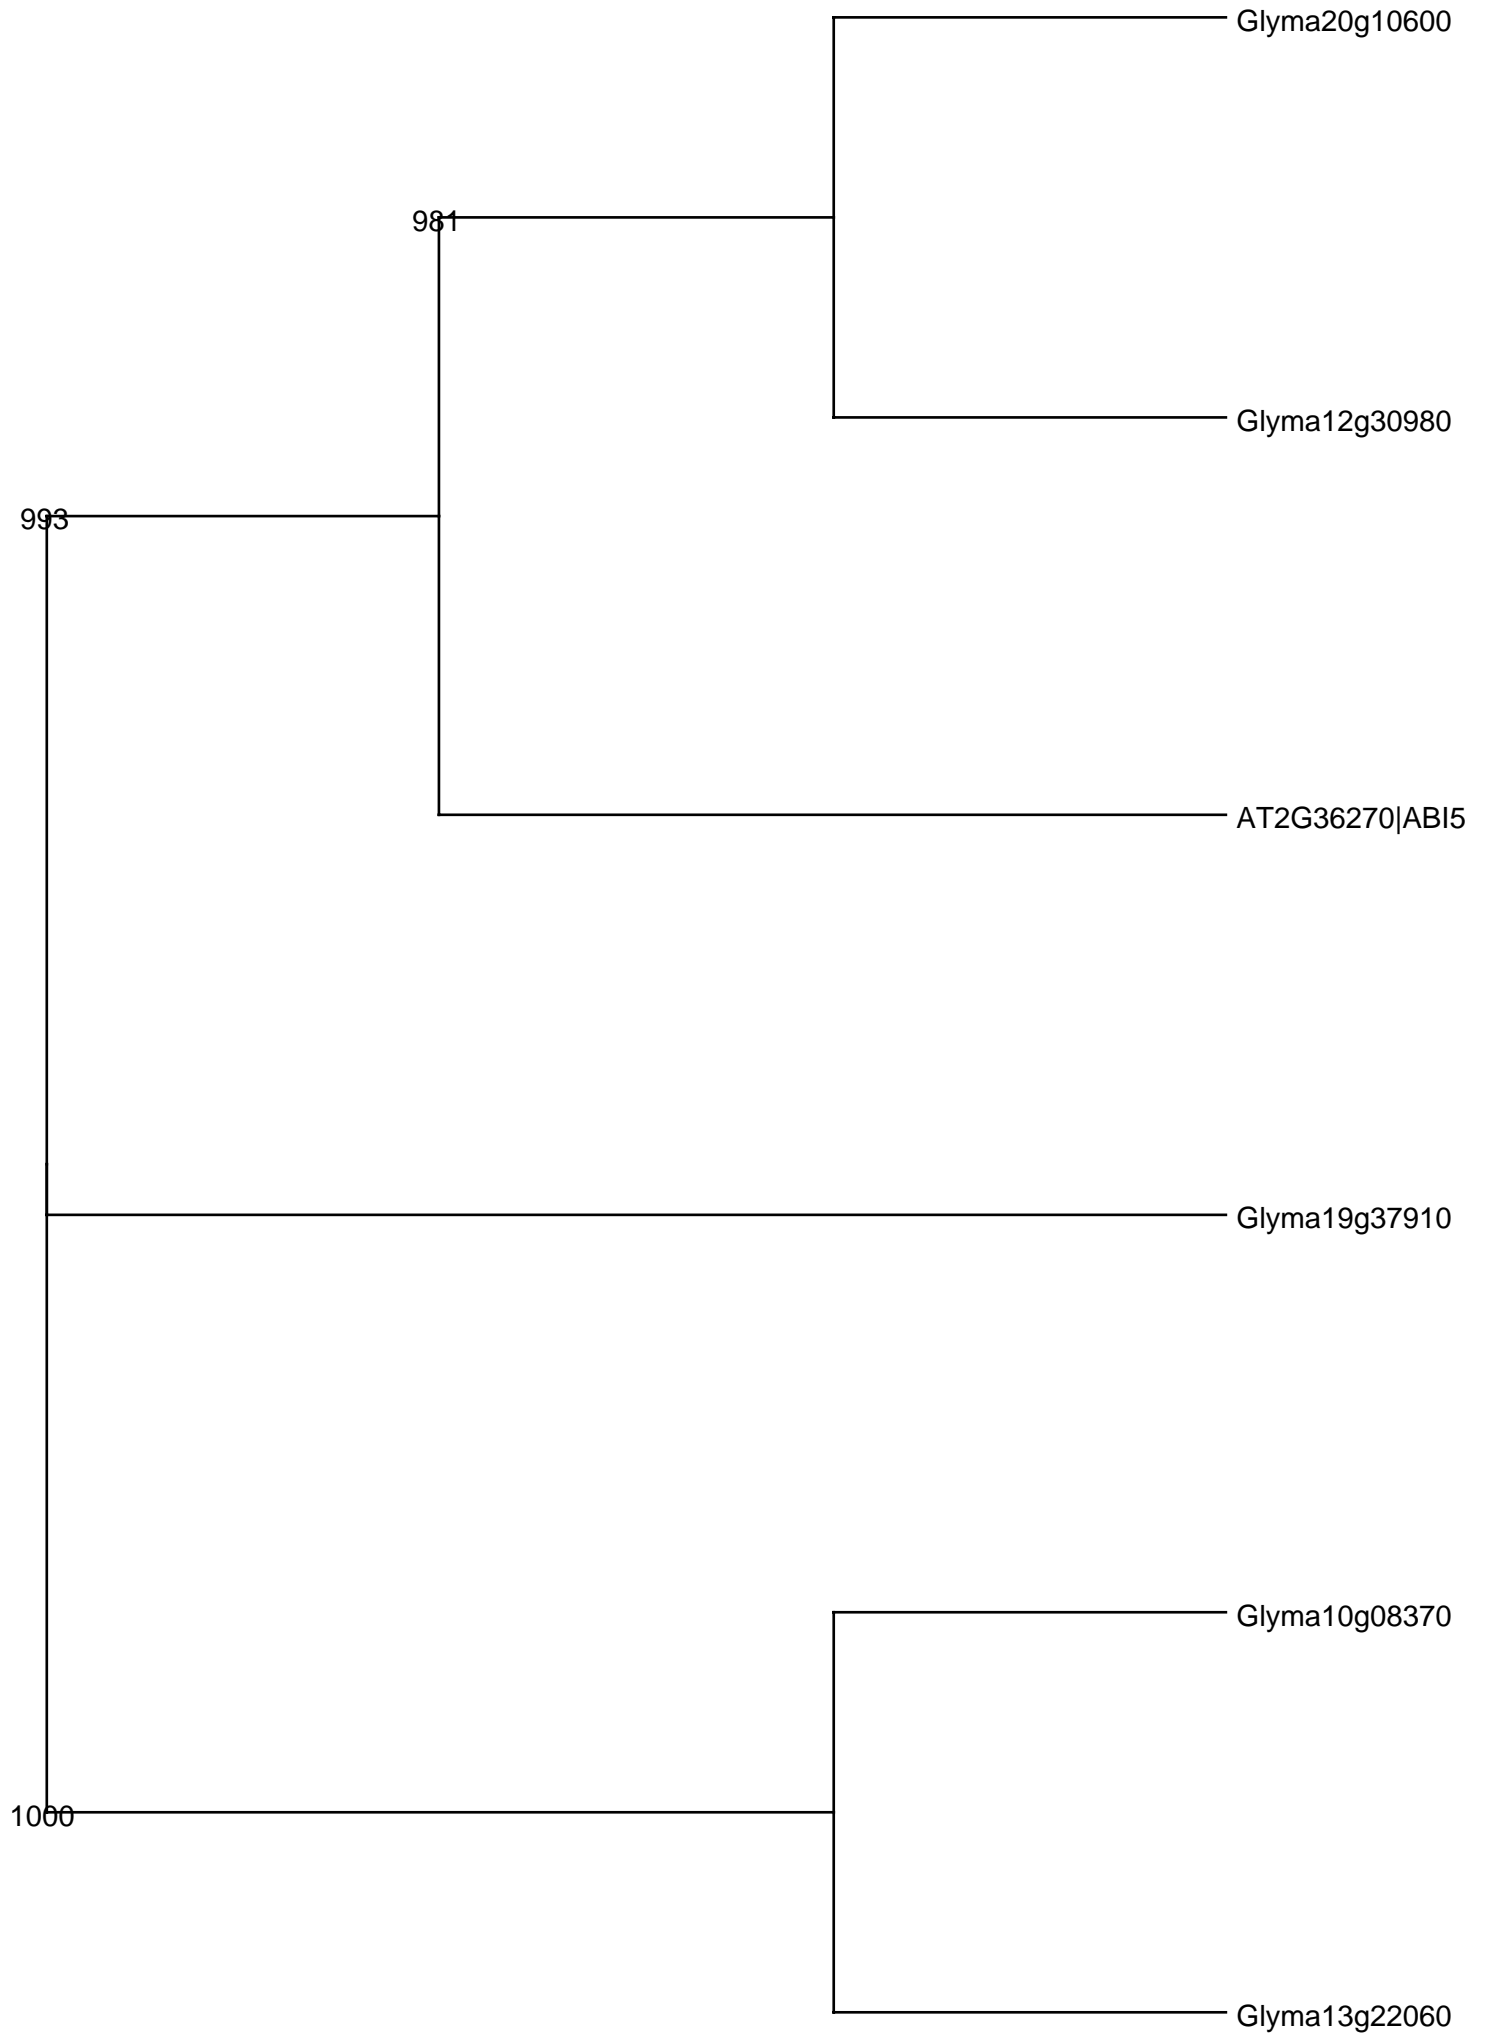

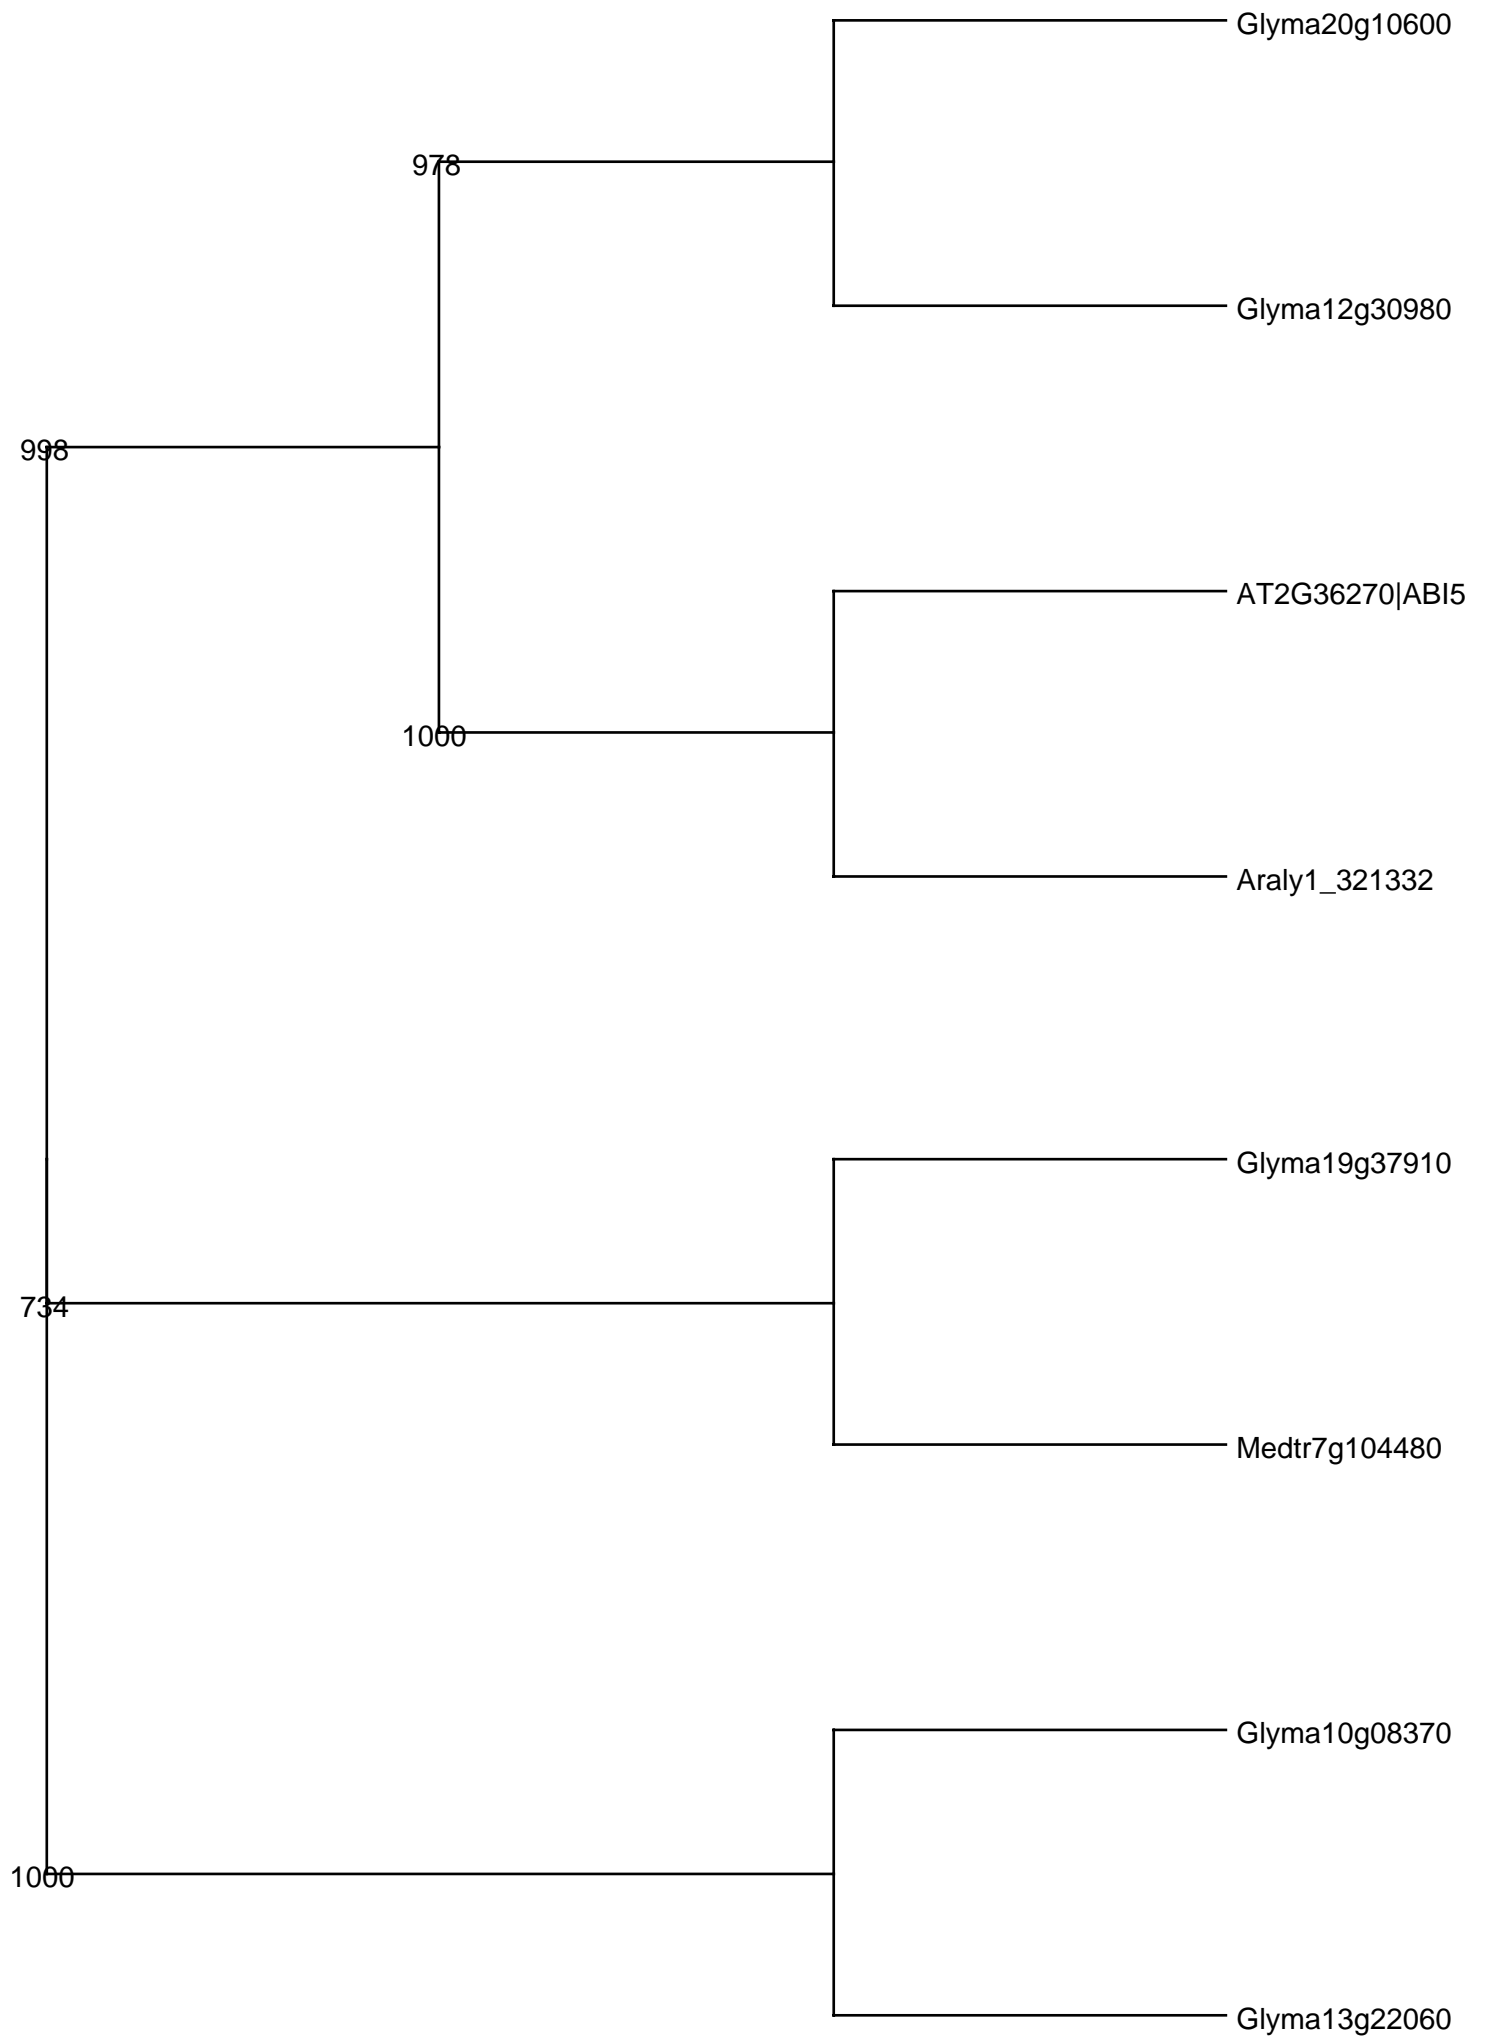

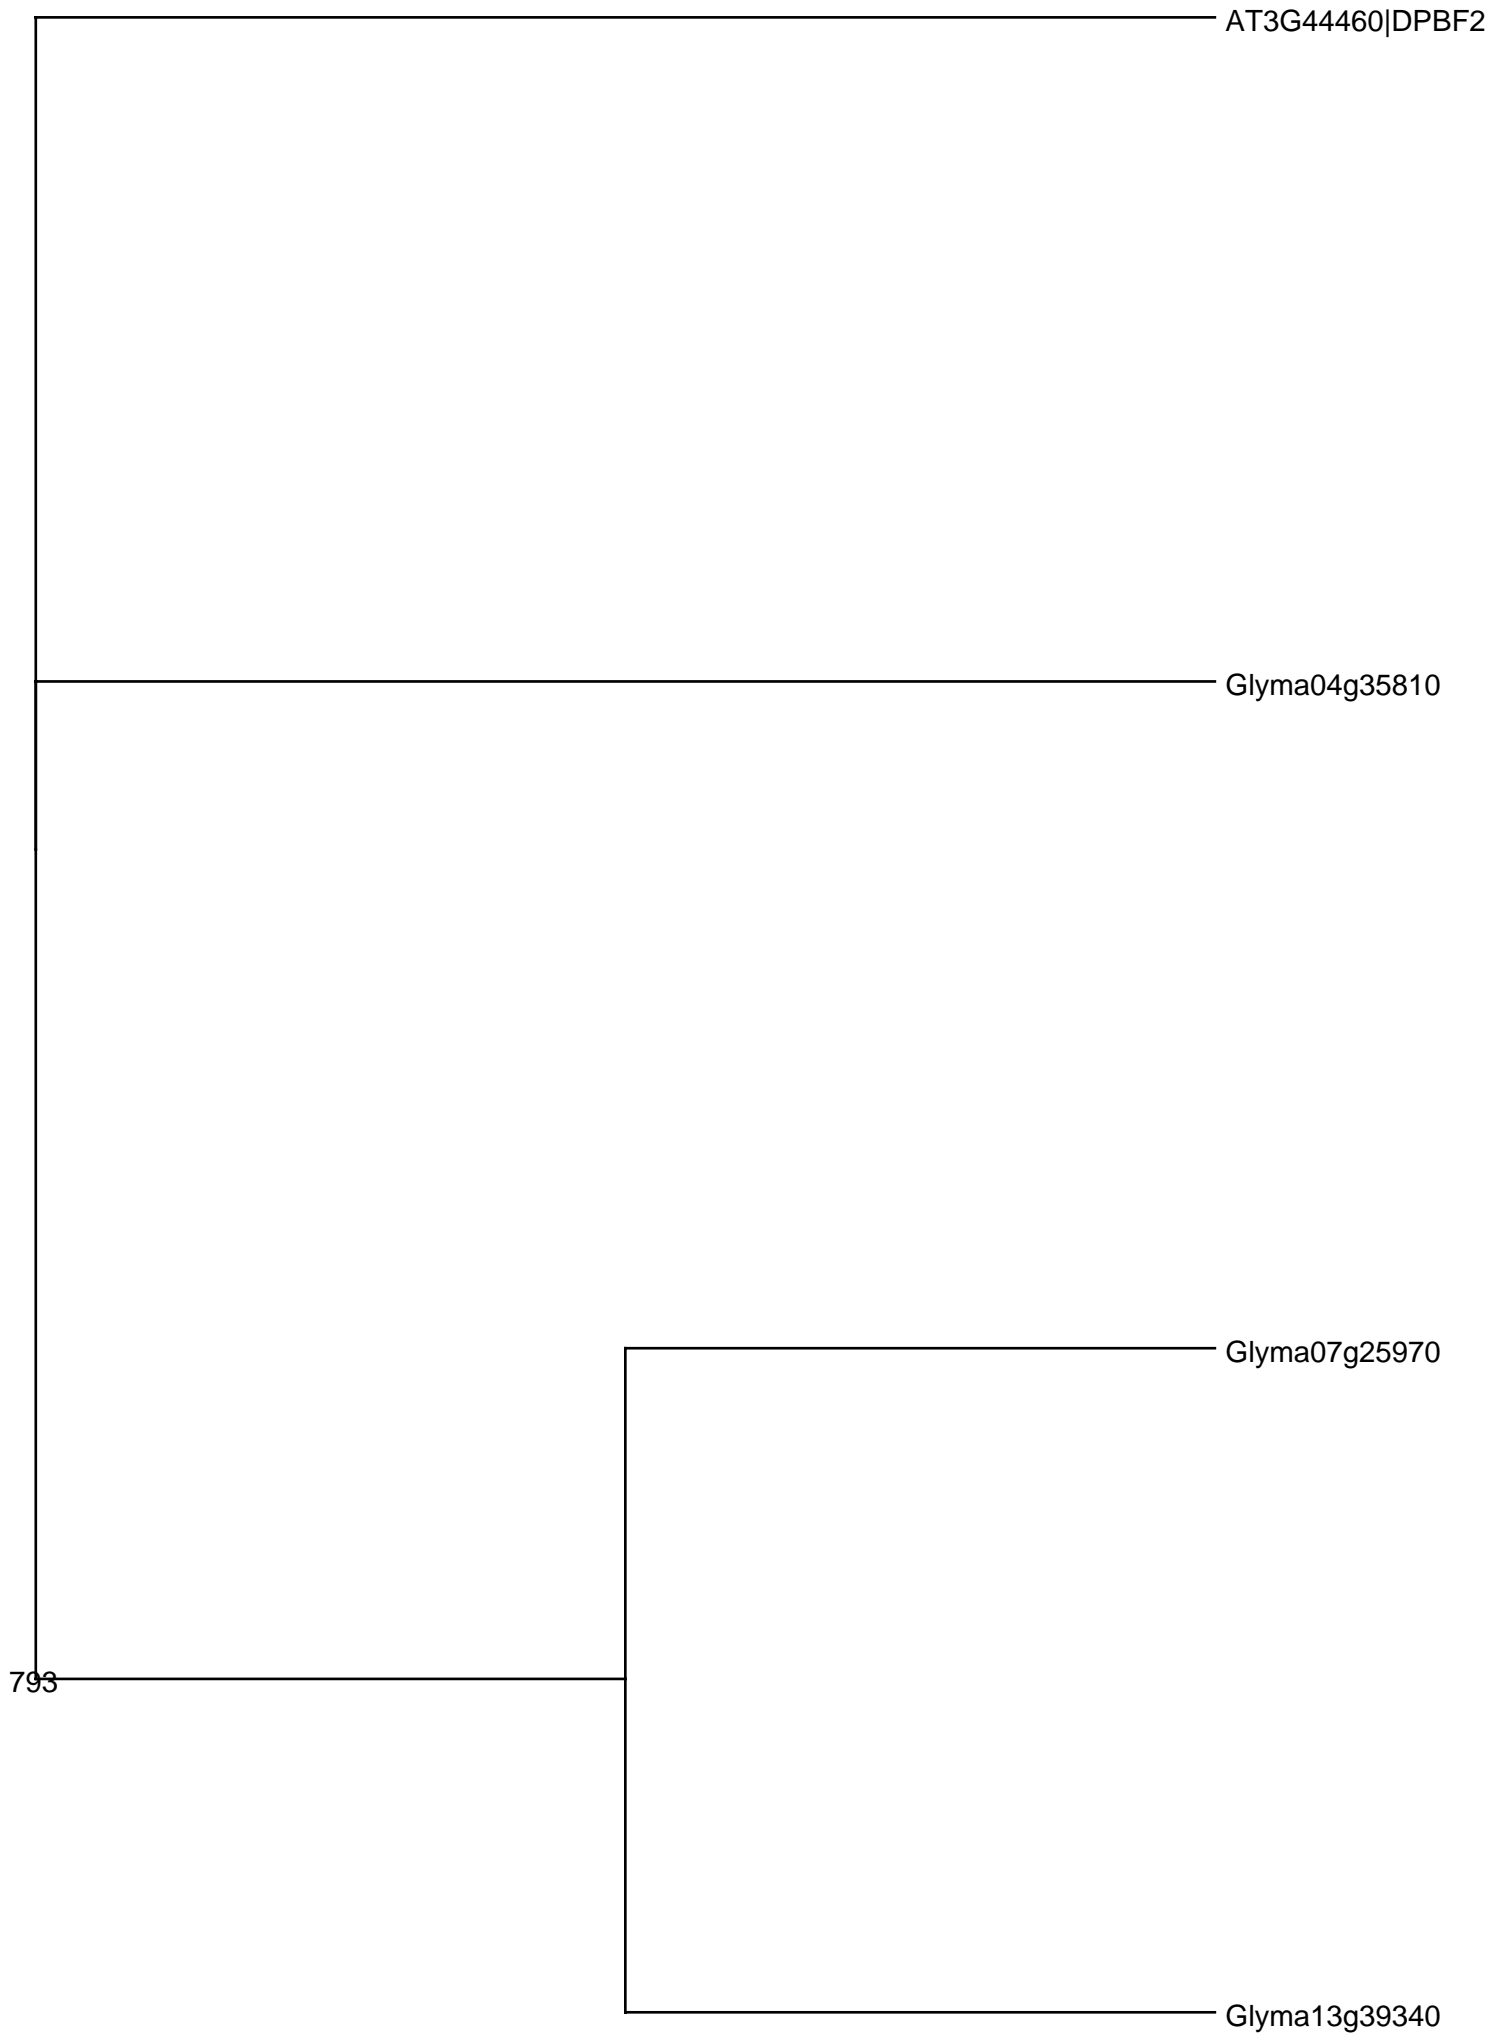

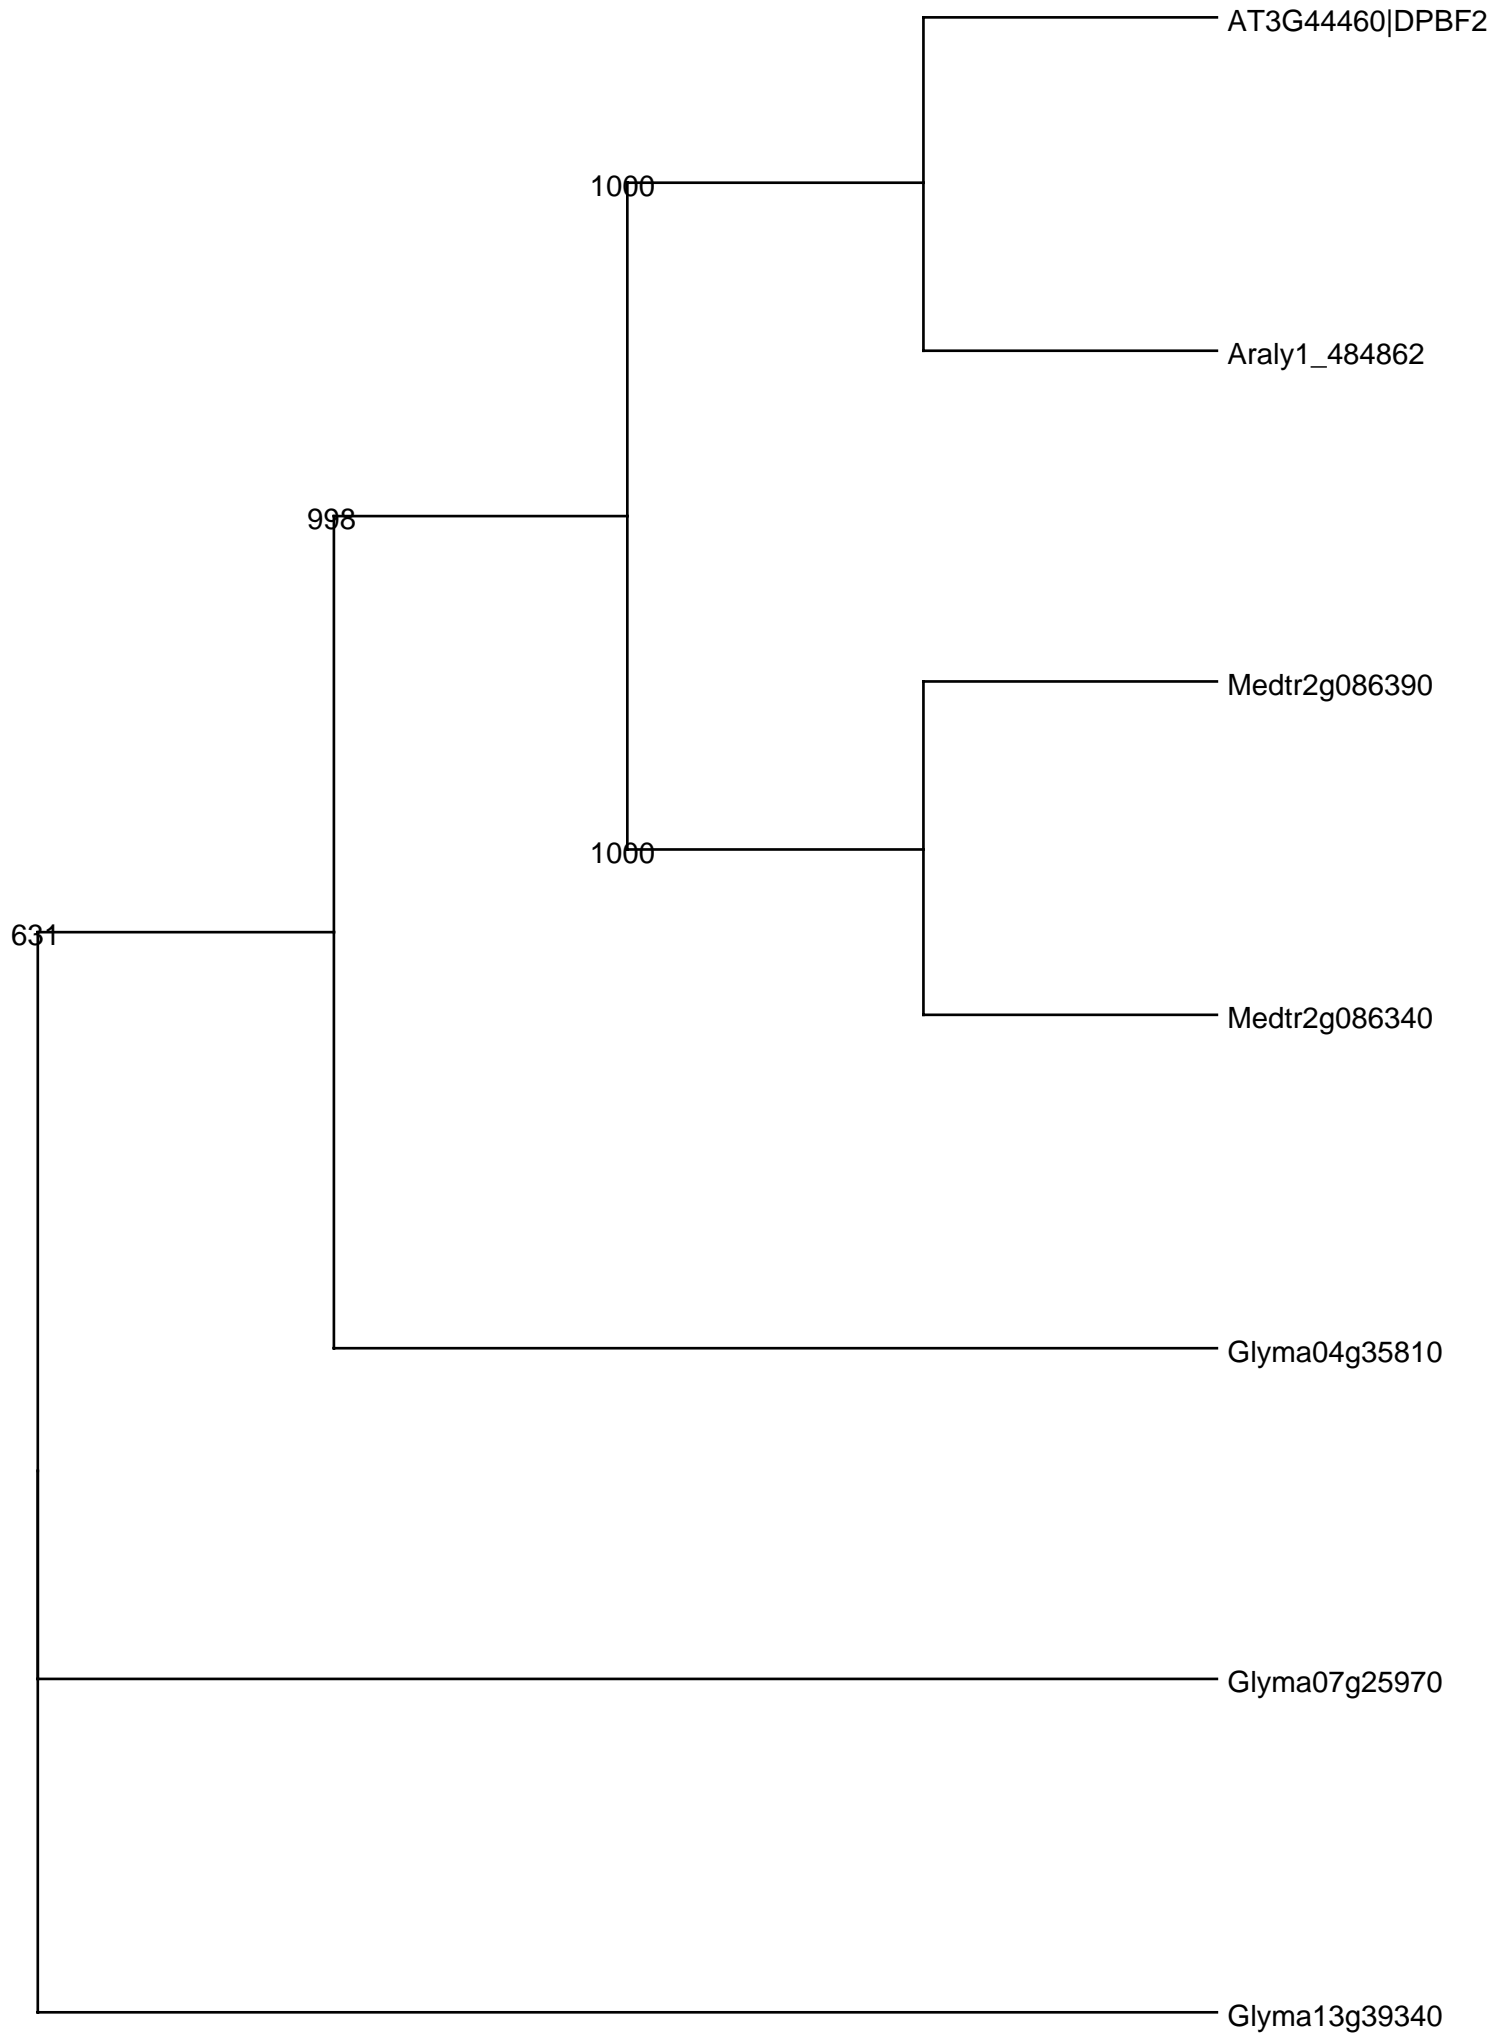

Supplement: pone.0038250.s008.pdf [file pone.0038250.s008.pdf]
