# Supplementary material for: Comparative Genomic Analysis of Soybean Flowering Genes
Source: PubMed Central journal article supplement (PMC3367986; doi:10.1371/journal.pone.0038250), 2012-06-05
Supplement: pone.0038250.s003.pdf [file pone.0038250.s003.pdf]

**Table S2. Soybean flowering genes preferentially or specifically expressed in flower**

| <b>soybean</b> | <b>description</b>                     | <b>OG_ID</b> | <b>Arabidopsis genes</b>                        |
|----------------|----------------------------------------|--------------|-------------------------------------------------|
| Glyma05g32680  | CCAAT-binding factor, subunit A (HAP3) | OG5_127594   | <i>NF-YB7;HAP3A;NF-YB8;NF-YB10;NF-YB3;HAP3B</i> |
| Glyma03g02210  | MADS box transcription factor          | OG5_135817   | <i>SHP2;AGL6;SHP1;STK;AG</i>                    |
| Glyma07g08890  | MADS box transcription factor          |              |                                                 |
| Glyma05g28140  | -                                      | OG5_144912   | <i>SEP3;SEP4;SEP2;SEP1</i>                      |
| Glyma08g11120  | MADS box transcription factor          |              |                                                 |
| Glyma18g00800  | -                                      |              |                                                 |
| Glyma16g32080  | -                                      | OG5_146543   | <i>FT;TSF;TFL1</i>                              |
| Glyma20g07050  | -                                      | OG5_150191   | <i>COL9;AT5G48250</i>                           |
| Glyma02g33040  | MADS box transcription factor          | OG5_164556   | <i>AGL18;AGL15</i>                              |
| Glyma06g12380  | MADS box transcription factor          | OG5_169532   | <i>PI</i>                                       |
| Glyma13g09660  | MADS box transcription factor          |              |                                                 |
| Glyma14g24590  | MADS box transcription factor          |              |                                                 |
| Glyma01g08150  | MADS box transcription factor          | OG5_170388   | <i>AP1;CAL</i>                                  |
| Glyma02g13420  | MADS box transcription factor          |              |                                                 |
| Glyma16g13070  | MADS box transcription factor          |              |                                                 |
| Glyma11g35270  | -                                      | OG5_170827   | <i>ELF4;ELF4-L3</i>                             |
| Glyma04g02980  | MADS box transcription factor          | OG5_190319   | <i>AP3</i>                                      |
| Glyma06g02990  | MADS box transcription factor          |              |                                                 |
| Glyma11g07820  | -                                      |              |                                                 |
