# Supplementary material for: Comparative Genomic Analysis of Soybean Flowering Genes
Source: PubMed Central journal article supplement (PMC3367986; doi:10.1371/journal.pone.0038250), 2012-06-05
Supplement: pone.0038250.s004.pdf [file pone.0038250.s004.pdf]

**Table S3. *G. max* genes containing large structural variation in comparison with *G. soja***

| <b>Large deletion sites</b>  |             |                                                                  |
|------------------------------|-------------|------------------------------------------------------------------|
| <i>G. max</i> genes          | OrthoMCL_ID | key flowering pathways involved                                  |
| Glyma10g32390                | OG5_127186  | light signaling                                                  |
| Glyma18g07770                |             |                                                                  |
| Glyma03g35610                | OG5_127266  | -                                                                |
| Glyma10g08710                |             |                                                                  |
| Glyma14g05430                | OG5_132181  | light signaling                                                  |
| Glyma19g41210                | OG5_136555  | light signaling                                                  |
| Glyma15g23400                |             |                                                                  |
| Glyma05g28130                | OG5_139532  | flowering pathway integrator, vernalization, ambient temperature |
| Glyma08g11110                | OG5_144912  | -                                                                |
| Glyma08g44650                | OG5_212406  | vernalization, meristem identity                                 |
| <b>Large insertion sites</b> |             |                                                                  |
| <i>G. max</i> genes          | OrthoMCL_ID | key flowering pathways involved                                  |
| Glyma01g39950                | OG5_126901  | -                                                                |
| Glyma10g02690                | OG5_130364  | autonomous, vernalization                                        |
| Glyma05g01510                | OG5_131003  | -                                                                |
| Glyma03g02210                | OG5_135817  | -                                                                |
| Glyma15g09500                |             |                                                                  |
| Glyma15g23400                | OG5_136555  | light signaling pathways                                         |
| Glyma15g04260                | OG5_147255  | -                                                                |
| Glyma15g35080                | OG5_153332  | -                                                                |
| Glyma06g17010                | OG5_190987  | Vernalization                                                    |
| Glyma08g44650                | OG5_212406  | vernalization, meristem identity                                 |
| Glyma16g05110                |             |                                                                  |
