# Supplementary material for: Comparative Genomic Analysis of Soybean Flowering Genes
Source: PubMed Central journal article supplement (PMC3367986; doi:10.1371/journal.pone.0038250), 2012-06-05
Supplement: pone.0038250.s005.pdf [file pone.0038250.s005.pdf]

**Table S4. Gene Ontology analysis on soybean genes of different categories**

| <b><i>paralogue-rich</i></b>           |             |                      |
|----------------------------------------|-------------|----------------------|
| GO Term                                | gene count* | p-value <sup>†</sup> |
| GO:0009733; response to auxin stimulus | 23          | 4.80E-19             |
| GO:0006952; defense response           | 23          | 3.66E-09             |
| GO:0009611; response to wounding       | 6           | 0.000388             |
| GO:0006869; lipid transport            | 8           | 0.002977             |

  

| <b><i>paralogue-less</i></b>                                            |             |                      |
|-------------------------------------------------------------------------|-------------|----------------------|
| GO Term                                                                 | gene count* | p-value <sup>†</sup> |
| GO:0008150; biological_process                                          | 880         | 1.77E-24             |
| GO:0006952; defense response                                            | 69          | 2.61E-17             |
| GO:0007242; intracellular signaling cascade                             | 28          | 4.80E-15             |
| GO:0009664; cell wall organization and biogenesis (sensu Magnoliophyta) | 12          | 7.68E-07             |
| GO:0006355; regulation of transcription, DNA-dependent                  | 91          | 3.09E-06             |
| GO:0006629; lipid metabolic process                                     | 29          | 6.90E-05             |
| GO:0006468; protein amino acid phosphorylation                          | 92          | 0.000907             |
| GO:0008152; metabolic process                                           | 58          | 0.001331             |
| GO:0006633; fatty acid biosynthetic process                             | 10          | 0.017789             |

Gene Ontology Term enrichment analysis was carried out by GeneMerge (Castillo-Davis and Hartl, 2003, *Bioinformatics*, 19:891).

\*: Arabidopsis gene counts

†: Adjusted by Bonferroni method
